# Supplementary material for: A framework for automated structure elucidation from routine NMR spectra
Source: Royal Society of Chemistry journal article supplement (doi:10.1039/d1sc04105c), 2021-01-01
Supplement: d1sc04105c3.pdf [file d1sc04105c3.pdf]

## Detailed test dataset results

This document provides details on the framework's performance in predicting for the substructure probabilities and the ranking of candidate molecular structures for each molecule in our test set, as well as the experimental  $^1\text{H}$  and  $^{13}\text{C}$  NMR spectra used as input. The data is ordered by the number of possible constitutional isomers generated by OMG using the molecular formula (SI section 3.5), starting with the largest. For each molecule, the SMILES string and molecular formula corresponding to the true molecular structure are listed first.

“Index of correct structure” denotes the rank of the correct structure as predicted for by our framework, with an index of “0” meaning that the correct structure was ranked as the most likely structure by our framework, “1” meaning the correct structure was the second ranked structure, and so on. An index of “-1” indicates that the correct structure was not generated as part of the ranked list of structures predicted for by our molecular graph generation algorithm. This index is reported alongside the total number of possible constitutional isomers for this molecular formula as generated by OMG.

“True structure loss” is the binary cross-entropy (BCE) loss between the predicted substructure probabilities and the correct structure substructure labels (SI section 3.5). A lower loss indicates better agreement between the ML-predicted substructure probabilities and the true substructure label, with 0 being perfect agreement.

The true structure is shown next along with the experimental  $^{13}\text{C}$  and  $^1\text{H}$  NMR spectra. The solvent in which the NMR spectra was collected in is noted in parentheses when available.

The 10 structures with the lowest BCE loss generated by our framework, sorted from lowest (most likely) to highest, are shown next. For each of the top 10 predicted molecular structures, the BCE loss between its ML-predicted substructure probabilities and the true structure's substructure label is displayed below an image of the predicted molecule's 2D structure.

For each molecule, additional details for the substructure predictions are shown on the following page. First, the top 10 highest probability substructures predicted for by our ML model are shown as SMARTS strings alongside their respective predicted probabilities. Next, the 10 highest probability true positive substructures (“best positives”) are shown. These are the substructures present in the true structure that the model predicted to be present with a high probability. Substructures listed under “best negatives”, “worst negatives”, and “worst positives” correspond to the lowest probability true negatives, highest probability false positives, and lowest probability false negatives, respectively.

In [129...]

Example 0 true smiles: O=C(O)C=Cc1c[nH]cn1 formula: C6H6N2O2  
Index of correct structure: -1 of 319796  
True structure loss: 0.084946  
True structure:

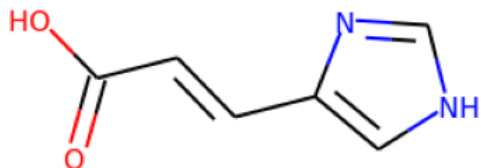

Experimental <sup>13</sup>C NMR (solvent: DMSO)

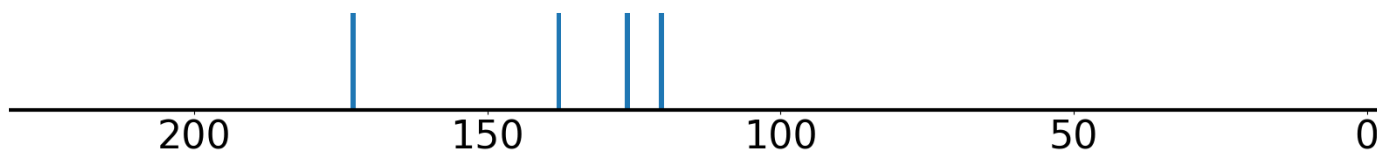

Experimental <sup>1</sup>H NMR (solvent: D2O)

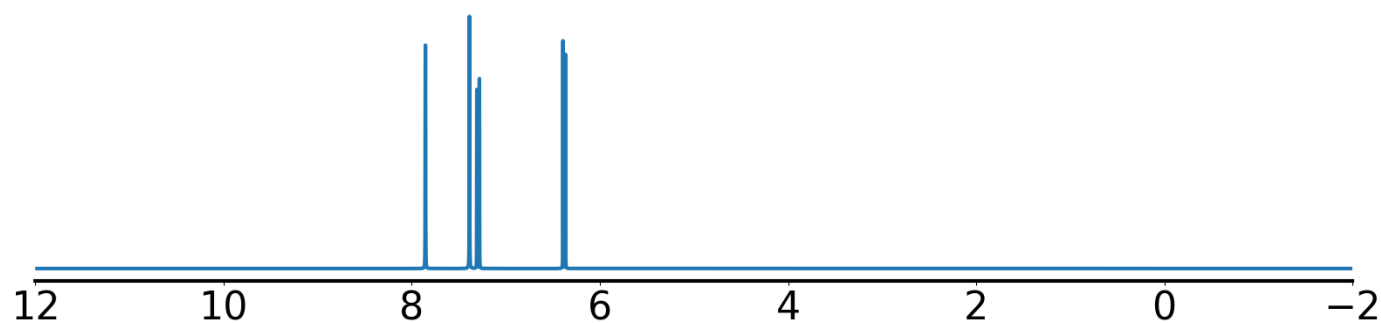

Top predicted structures (loss):

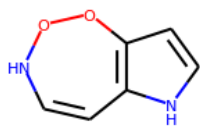

0.02923

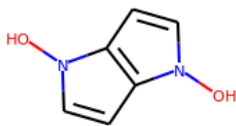

0.031375

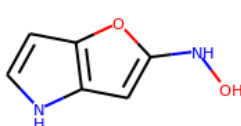

0.032855

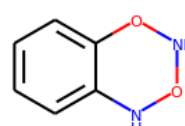

0.034147

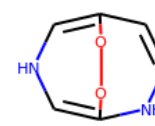

0.034643

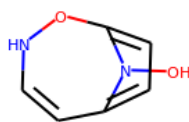

0.034753

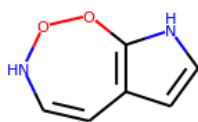

0.035312

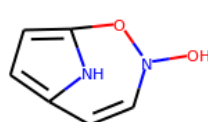

0.035873

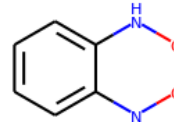

0.036152

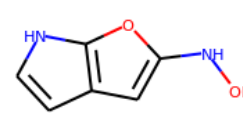

0.036976

| Top predicted substructures | prob   |                                              |  |        |
|-----------------------------|--------|----------------------------------------------|--|--------|
| [#6H1]                      | 0.9994 | O=[#6][#6][#6X3]                             |  | 0.8946 |
| [#6X3][#6X3]                | 0.9945 | [cH][cH]                                     |  | 0.7357 |
| [#6X3H1][#6X3H0]            | 0.9782 | [#7][#6X3H0][#6X3H1]                         |  | 0.7178 |
| [cH]                        | 0.9777 | [#6X3][#6X3][#6X3][#6X3]                     |  | 0.7158 |
| [#7][#6][#6X3]              | 0.9358 | [#7][#6][#6][#6X3]                           |  | 0.7103 |
| best positives              | prob   | best negatives                               |  | prob   |
| [#6H1]                      | 0.9994 | {OX2H0}[CX4H1][CX4H1]({CX4H2}[CX4H1])[CX4H1] |  | 0.0    |
| [#6X3][#6X3]                | 0.9945 | {OX2H0}[CX4H2][CX4H1]({CX4H1})[CX4H1]        |  | 0.0    |
| [#6X3H1][#6X3H0]            | 0.9782 | {OX2H0}1[CX4H2][CX4H2][CX4H1][CX4H1]1        |  | 0.0    |
| [cH]                        | 0.9777 | [CX4H0]({OX2H1})({CX4H3})({CX4H2})[CX4H1]    |  | 0.0    |
| [#7][#6][#6X3]              | 0.9358 | [CX4H0]({CX4H3})({CX4H2})({CX4H1})[CX4H1]    |  | 0.0    |
| [#7][#6X3H0][#6X3H1]        | 0.7178 | [CX4H0]({CX4H3})({CX4H2})({CX4H2})[CX3H0]    |  | 0.0    |
| [#7][#6][#6][#6X3]          | 0.7103 | [CX4H0]({CX4H3})({CX4H2})({CX4H1})[CX3H1]    |  | 0.0    |
| [#6X3][#7][#6X3]            | 0.7075 | [CX4H0]({OX2H0})({CX4H3})({CX4H2})[CX3H1]    |  | 0.0    |
| [#7][#6H0][#6H1]            | 0.6872 | {OX2H0}[CX4H2][CX4H1]({CX4H1})[CX4H3]        |  | 0.0    |
| {OX2H1}                     | 0.5786 | {OX2H1}[CX4H2][CX4H1]({CX4H2})[CX4H2]        |  | 0.0    |
| worst negatives             | prob   | worst positives                              |  | prob   |
| O=[#6][#6][#6X3]            | 0.8946 | [#6X3][#6X3]=[#6X3][#6X3]                    |  | 0.0091 |
| [cH][cH]                    | 0.7357 | [#7][#6][#6]=[#6X3]                          |  | 0.0166 |
| [#6X3][#6X3][#6X3][#6X3]    | 0.7158 | [CX3H1]([CX3H1])[cX3H0]                      |  | 0.0167 |
| [#8][#6][#6][#6X3]          | 0.5835 | [CX3H1]([CX3H1])[CX3H0]                      |  | 0.0196 |
| [cX3H1]([cX3H1])[cX3H0]     | 0.5425 | [#6X3H1]=[#6X3H1][#6X3H0][#6X3H1]            |  | 0.0201 |
| [#6H1][#6H1]                | 0.5238 | [#6X3][#6X3][#6X3]=[#6X3]                    |  | 0.0234 |
| [#7][#6][#6][#6][#7]        | 0.3947 | [CHX3](=C)C                                  |  | 0.0257 |
| [#7X3H0]                    | 0.3928 | {OX1H0}=[CX3H0][CX3H1]=[CX3H1]               |  | 0.0412 |
| [#6X3H2]                    | 0.3403 | [CHX3]=[CHX3]                                |  | 0.0521 |
| [#7][#7]                    | 0.2663 | [#6]1[#6][#7][#6][#7]1                       |  | 0.0653 |

---

Example 1 true smiles: Nc1ccccc1C(=O)O formula: C7H7NO2  
Index of correct structure: 0 of 141060  
True structure loss: 0.020632  
True structure:

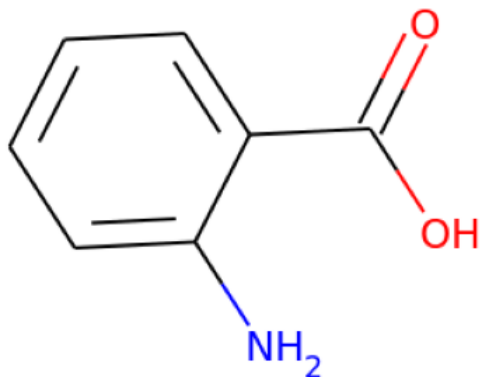

Experimental <sup>13</sup>C NMR (solvent: DMSO-d6)

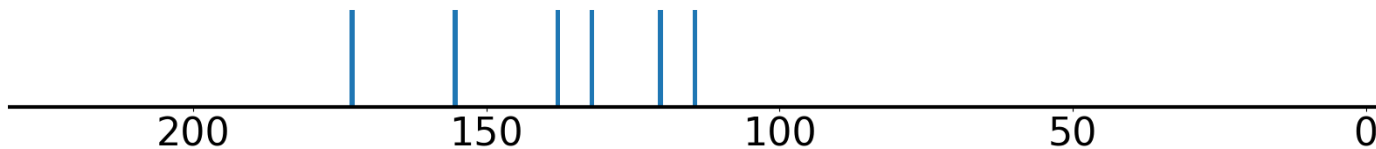

Experimental <sup>1</sup>H NMR (solvent: MeOD)

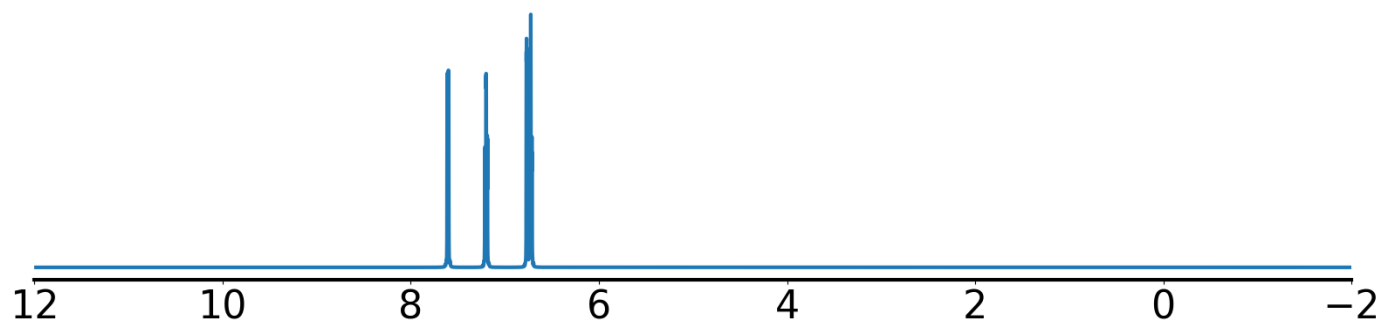

Top predicted structures (loss):

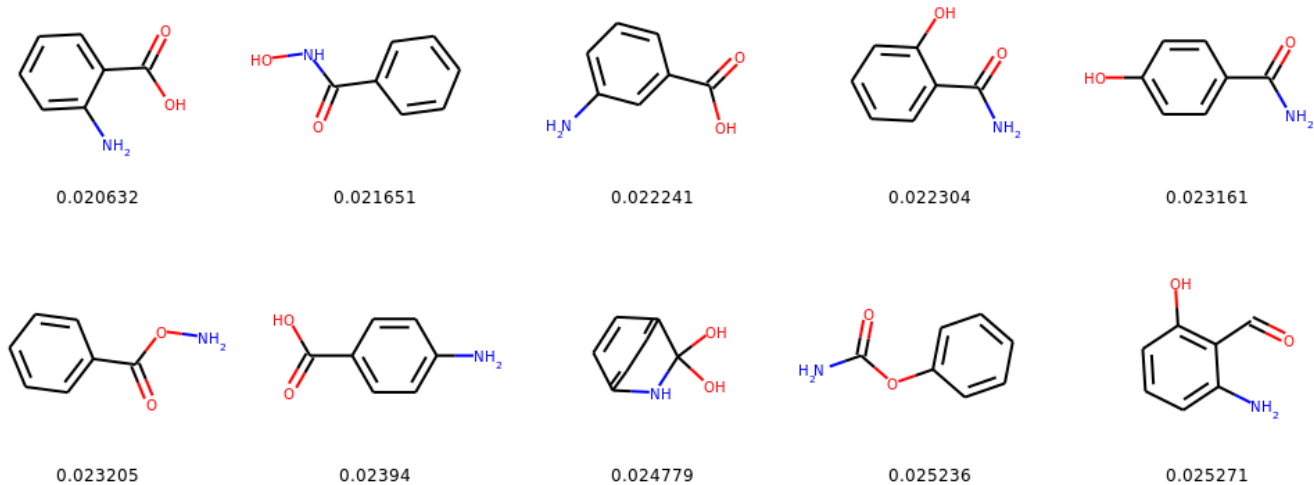

|                                  |        |                                           |        |
|----------------------------------|--------|-------------------------------------------|--------|
| Top predicted substructures      | prob   |                                           |        |
| [#6H1]                           | 0.9998 | [cH]                                      | 0.9823 |
| [#6X3][#6X3]                     | 0.9996 | [cX3H1]([cX3H1])[cX3H0]                   | 0.9653 |
| [cH][cH]                         | 0.9919 | [cX3H1]([cX3H1])[cX3H1]                   | 0.9234 |
| [#6X3H1][#6X3H0]                 | 0.9886 | O=[#6][#6][#6X3]                          | 0.9193 |
| [#6X3][#6X3][#6X3][#6X3]         | 0.984  | [#6H1][#6H1]                              | 0.9028 |
| best positives                   | prob   | best negatives                            | prob   |
| [#6H1]                           | 0.9998 | [OX2H0]1[CX4H2][CX4H2][CX4H1][CX4H1]1     | 0.0    |
| [#6X3][#6X3]                     | 0.9996 | [OX2H0][CX4H2][CX4H1]([CX4H1])[CX4H1]     | 0.0    |
| [cH][cH]                         | 0.9919 | [CX4H1]([CX4H3])([CX4H2])[CX4H0]          | 0.0    |
| [#6X3H1][#6X3H0]                 | 0.9886 | [CX4H0]([NX3H1])([CX4H3])([CX4H2])[CX4H1] | 0.0    |
| [#6X3][#6X3][#6X3][#6X3]         | 0.984  | [CX4H0]([OX2H1])([CX4H3])([CX4H2])[CX4H1] | 0.0    |
| [cH]                             | 0.9823 | [OX2H0][CX4H2][CX4H2][CX4H1][OX2H0]       | 0.0    |
| [cX3H1]([cX3H1])[cX3H0]          | 0.9653 | [CX4H0]([OX2H0])([CX4H3])([CX4H2])[CX4H2] | 0.0    |
| [cX3H1]([cX3H1])[cX3H1]          | 0.9234 | [CX4H1]([OX2H1])([CX4H2])[CX2H0]          | 0.0    |
| O=[#6][#6][#6X3]                 | 0.9193 | [CX4H0]([CX4H3])([CX4H2])([CX4H2])[CX3H0] | 0.0    |
| [#6H1][#6H1]                     | 0.9028 | [OX2H1][CX4H2][CX4H1]([CX4H2])[CX4H2]     | 0.0    |
| worst negatives                  | prob   | worst positives                           | prob   |
| [#8][#6H0][#6H1]                 | 0.7522 | [CX3](=[OX1])O                            | 0.2177 |
| [#6X3H1][#6X3H1][#6X3H0][#6X3H1] | 0.658  | [CX3](=O)[OX2H1]                          | 0.3572 |
| [#6]1[#6][#6][#6][#6][#7]1       | 0.5493 | [#7H2][#6H0]                              | 0.3611 |
| [#6X3][#7][#6X3]                 | 0.5284 | [#7X3H2]                                  | 0.4027 |
| [cH]cO                           | 0.4873 | [#6]1[#6][#6][#6][#6][#6]1                | 0.4328 |
| O=[cX3]                          | 0.4022 | [#8]=[#6][#8]                             | 0.4892 |
| [OX2H][cX3]:[c]                  | 0.3668 | [#7][#6][#6X3]                            | 0.6413 |
| [#8]=[#6H0][#6H1]                | 0.3135 | [#7][#6X3H0][#6X3H1]                      | 0.6701 |
| [OX1H0]=[cX3H0][cX3H1]           | 0.3133 | [#7][#6H0][#6H1]                          | 0.7249 |
| [#8]=[#6][#6H1][#6H1]            | 0.2988 | [#7][#6][#6][#6X3]                        | 0.7321 |

---

Example 2 true smiles: Nc1ccc(C(=O)O)c1 formula: C7H7NO2  
Index of correct structure: 5 of 141060  
True structure loss: 0.024241  
True structure:

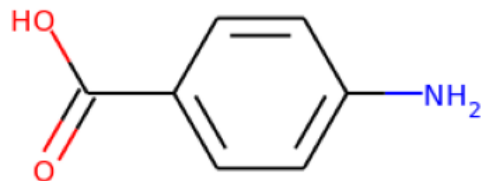

Experimental <sup>13</sup>C NMR (solvent: D<sub>2</sub>O)

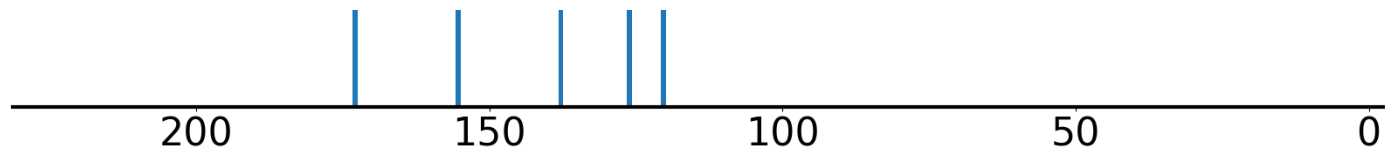

Experimental <sup>1</sup>H NMR (solvent: d<sub>2</sub>o)

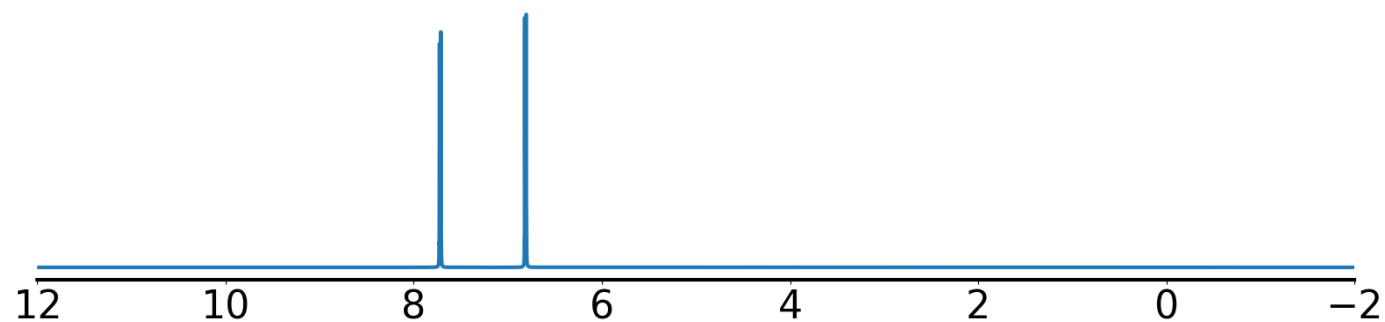

Top predicted structures (loss):

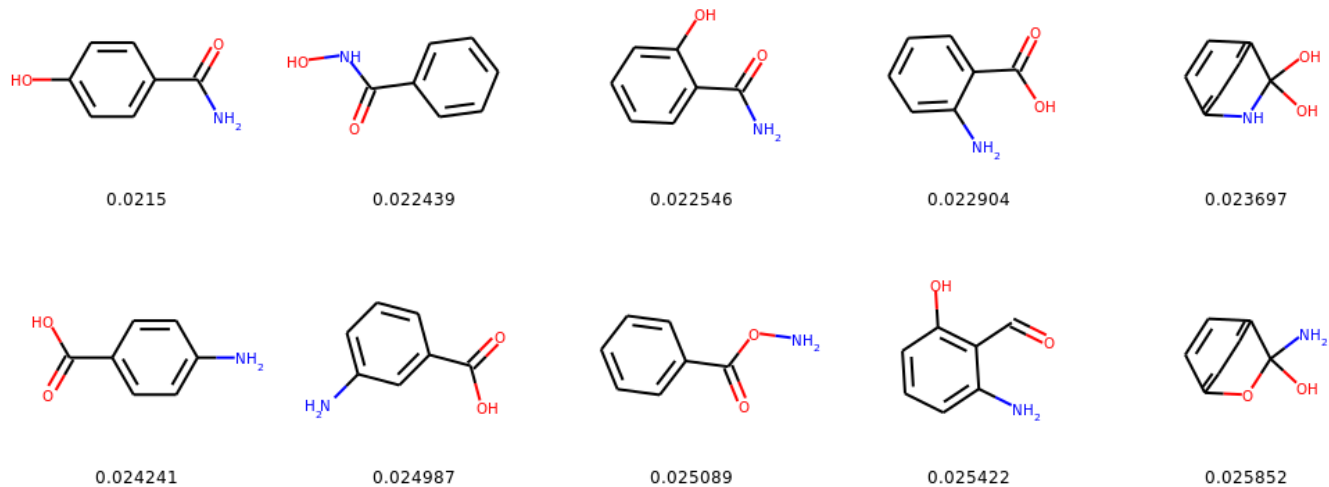

| Top predicted substructures | prob   |                                           |        |
|-----------------------------|--------|-------------------------------------------|--------|
| [#6X3][#6X3]                | 0.9994 | [cH]                                      | 0.9609 |
| [#6H1]                      | 0.9982 | [cX3H1]([cX3H1])[cX3H0]                   | 0.9395 |
| [#6X3H1][#6X3H0]            | 0.9873 | [#6H1][#6H1]                              | 0.8885 |
| [#6X3][#6X3][#6X3][#6X3]    | 0.9721 | O=[#6][#6][#6X3]                          | 0.8463 |
| [cH][cH]                    | 0.9673 | [#7][#6][#6X3]                            | 0.8193 |
| best positives              | prob   | best negatives                            | prob   |
| [#6X3][#6X3]                | 0.9994 | [CX4H0]([NX3H1])([CX4H3])([CX4H2])[CX4H1] | 0.0    |
| [#6H1]                      | 0.9982 | [CX4H1]([CX4H3])([CX4H2])[CX4H0]          | 0.0    |
| [#6X3H1][#6X3H0]            | 0.9873 | [CX4H0]([CX4H3])([CX4H2])([CX4H2])[CX4H1] | 0.0    |
| [#6X3][#6X3][#6X3][#6X3]    | 0.9721 | [CX4H0]([CX4H3])([CX4H2])([CX4H2])[CX3H0] | 0.0    |
| [cH][cH]                    | 0.9673 | [OX2H0][CX4H2][CX4H1]([CX4H1])[CX4H1]     | 0.0    |
| [cH]                        | 0.9609 | [CX4H1]([NX3H1])([CX4H3])[CX4H2]          | 0.0    |
| [cX3H1]([cX3H1])[cX3H0]     | 0.9395 | [OX2H1][CX4H2][CX4H1]([CX4H2])[CX4H2]     | 0.0    |
| [#6H1][#6H1]                | 0.8885 | [OX2H0][CX4H2][CX4H1]([CX4H2])[CX4H1]     | 0.0    |
| O=[#6][#6][#6X3]            | 0.8463 | [OX1H0]=[CX3H0]1[CX4H1][CX4H1][CX4H2]1    | 0.0    |
| [#7][#6][#6X3]              | 0.8193 | [OX2H0]1[CX4H2][CX4H2][CX4H1][CX4H1]1     | 0.0    |
| worst negatives             | prob   | worst positives                           | prob   |
| [cX3H1]([cX3H1])[cX3H1]     | 0.7249 | [CX3](=O)[OX2H1]                          | 0.23   |
| [#8][#6H0][#6H1]            | 0.6587 | [CX3](=[OX1])O                            | 0.2396 |
| [cH]cO                      | 0.6406 | [#7X3H2]                                  | 0.2599 |
| [#6]1[#6][#6][#6][#6][#7]1  | 0.6403 | [cX3H0][cX3H1][cX3H1][cX3H0]              | 0.2996 |
| [#6X3][#7][#6X3]            | 0.5149 | [#6]1[#6][#6][#6][#6][#6]1                | 0.3605 |
| [OX2H][cX3]:[c]             | 0.3907 | [#7H2][#6H0]                              | 0.395  |
| O=[cX3]                     | 0.3635 | [#8]=[#6][#8]                             | 0.4668 |
| [cX3H1]([nX2H0])[cX3H1]     | 0.34   | [#7][#6H0][#6H1]                          | 0.5704 |
| [#8]=[#6H0][#6H1]           | 0.3119 | [#7][#6X3H0][#6X3H1]                      | 0.594  |
| [OX1H0]=[cX3H0][cX3H1]      | 0.2823 | [#6X3H1][#6X3H1][#6X3H0][#6X3H1]          | 0.6314 |

---

Example 3 true smiles: CN(CC(=O)O)C(=N)N formula: C4H9N3O2  
 Index of correct structure: -1 of 108327  
 True structure loss: 0.058628  
 True structure:

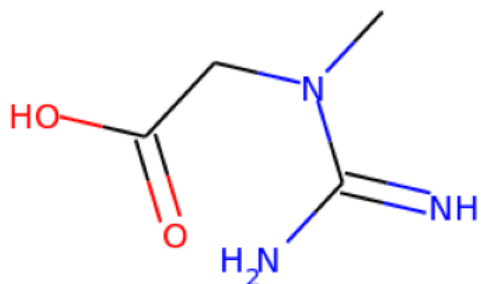

Experimental <sup>13</sup>C NMR (solvent: D2O)

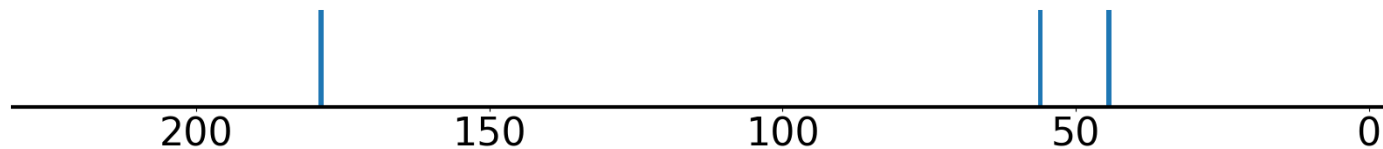

Experimental <sup>1</sup>H NMR (solvent: D2O)

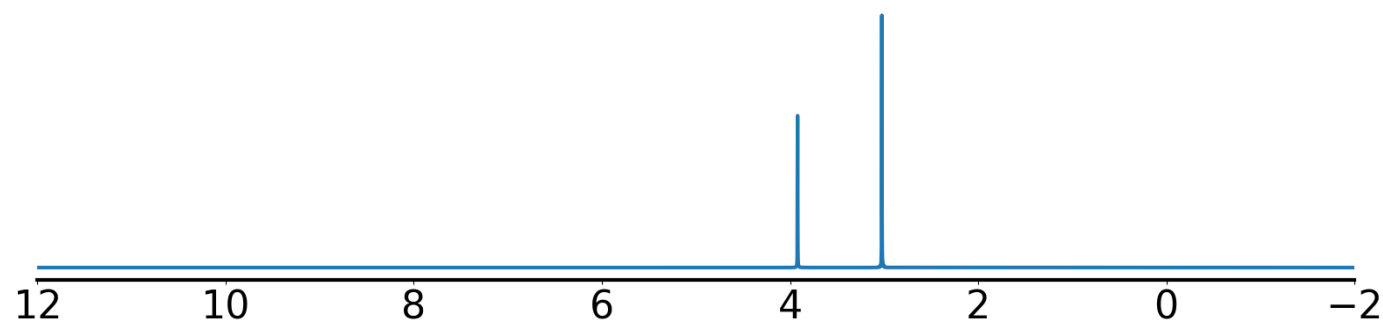

Top predicted structures (loss):

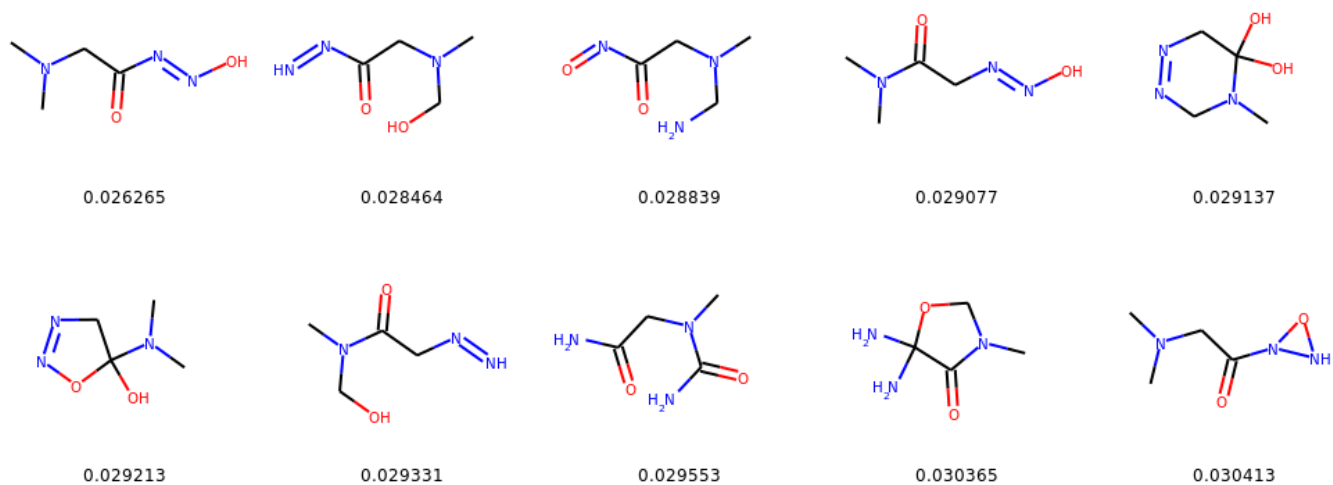



|                             |        |                                   |        |
|-----------------------------|--------|-----------------------------------|--------|
| Top predicted substructures | prob   |                                   |        |
| [CX3](=[OX1])C              | 0.9128 | [#7X3H2]                          | 0.7896 |
| [#7][#6][#6][#7]            | 0.8608 | [#7X3][#6H3]                      | 0.7794 |
| [CX4H3]                     | 0.838  | [#7][#6][#6][#6][#7]              | 0.7379 |
| [#7][#6][#6X3]              | 0.7978 | [#6H3][#7]                        | 0.674  |
| [#7][#6H2]                  | 0.7944 | [#7X3][#6H2]                      | 0.6623 |
| best positives              | prob   | best negatives                    | prob   |
| [CX3](=[OX1])C              | 0.9128 | CC=CC#C                           | 0.0    |
| [CX4H3]                     | 0.838  | C=CC=CC#C                         | 0.0    |
| [#7][#6][#6X3]              | 0.7978 | CC=CCC#C                          | 0.0    |
| [#7][#6H2]                  | 0.7944 | [CX2H1]#[CX2H0][CX3H1]=[CX3H0]    | 0.0    |
| [#7X3H2]                    | 0.7896 | CCC=CC#C                          | 0.0    |
| [#7X3][#6H3]                | 0.7794 | [CX3H0](=[CX3H1])([CX4H2])[CX2H0] | 0.0    |
| [#6H3][#7]                  | 0.674  | [CX3H0](=[CX3H1])([CX4H3])[CX3H1] | 0.0    |
| [#7X3][#6H2]                | 0.6623 | CC#CCC=C                          | 0.0    |
| [CX4H3][NX3H0]              | 0.5483 | [CX3H0](=[CX3H1])([OX2H0])[CX2H0] | 0.0    |
| [#6H3][#7][#6H2]            | 0.5226 | [CX3H0](=[CX3H1])([CX4H1])[CX2H0] | 0.0    |
| worst negatives             | prob   | worst positives                   | prob   |
| [#7][#6][#6][#7]            | 0.8608 | [OX1H0]=[CX3H0]([#8])[CX4H2]      | 0.015  |
| [#7][#6][#6][#6][#7]        | 0.7379 | [#7][#6]([#7])=[#7]               | 0.0251 |
| [#7X3H1]                    | 0.5663 | [CX3H0](=[OX1H0])([OX2H1])[CX4H2] | 0.0375 |
| [#7H2][#6H1]                | 0.4283 | [#7][#6]=[#7]                     | 0.104  |
| [#6H1]                      | 0.3849 | [#7H1]=[#6H0][#7X3][#6H3]         | 0.1049 |
| [CX4H2]CC=O                 | 0.3775 | [#6]=[#7H]                        | 0.1246 |
| [#8]=[#6H0][#6H1]           | 0.3633 | [CX4H2]([NX3H0])[CX3H0]           | 0.1364 |
| O=[CX3][CX4H]               | 0.3399 | [NH1]=[#6][#7]                    | 0.1389 |
| [#7][#6H0][#6H1]            | 0.3063 | [#7][#6H0]=[#7]                   | 0.1562 |
| [#6]1[#6][#7][#6][#7]1      | 0.2866 | [#8]=[#6][#8]                     | 0.1903 |

---

Example 4 true smiles: CC1CNC(=O)NC1=O formula: C5H8N2O2  
Index of correct structure: 1 of 96528  
True structure loss: 0.033156  
True structure:

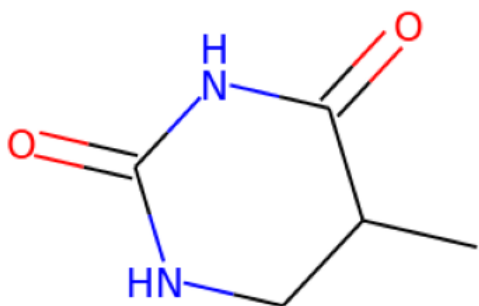

Experimental <sup>13</sup>C NMR (solvent: DMSO)

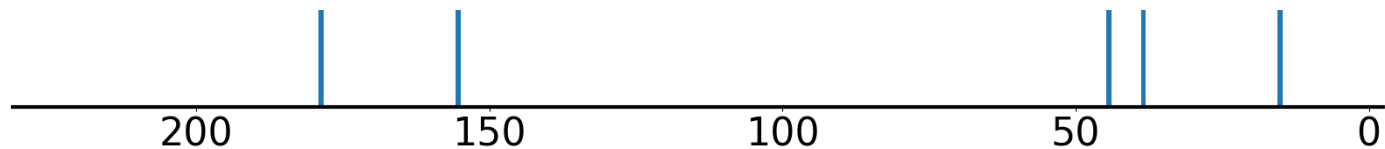

Experimental <sup>1</sup>H NMR (solvent: d2o)

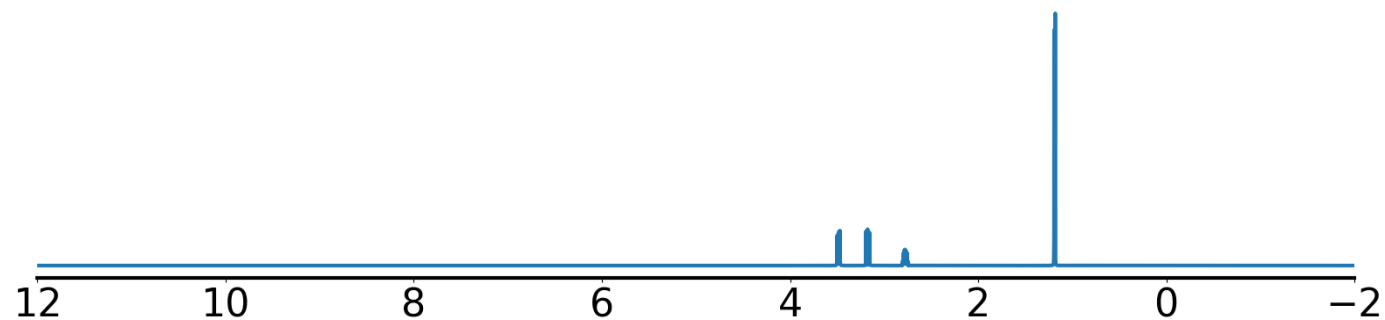

Top predicted structures (loss):

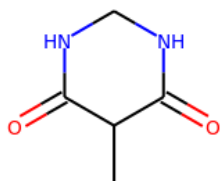

0.030971

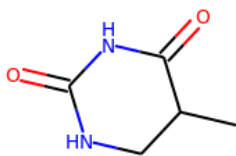

0.033156

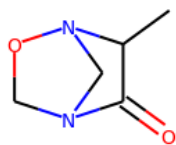

0.038271

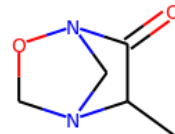

0.038271

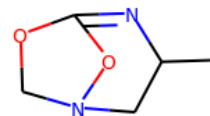

0.042304

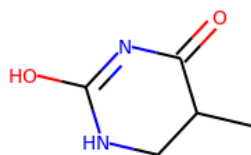

0.043594

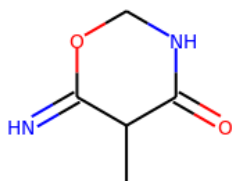

0.044369

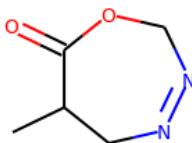

0.046526

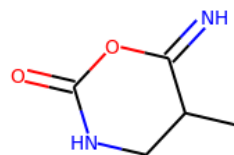

0.047441

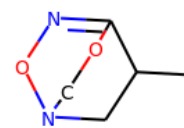

0.048062

| Top predicted substructures | prob   |                                        |        |
|-----------------------------|--------|----------------------------------------|--------|
| [CX4H3]                     | 0.9992 | [#6H3][#6][#6]                         | 0.841  |
| [CX4H3][#6]                 | 0.9739 | [#6H2][#7][#6X3]                       | 0.8402 |
| [CX3](=[OX1])C              | 0.9624 | [#7][#6][#6][#6X3]                     | 0.8164 |
| [#7X3][#6H2]                | 0.9244 | O=[CX3][CX4H]                          | 0.787  |
| [#7][#6H2]                  | 0.9039 | [#6H1]                                 | 0.7465 |
| best positives              | prob   | best negatives                         | prob   |
| [CX4H3]                     | 0.9992 | C=CC=CC#C                              | 0.0    |
| [CX4H3][#6]                 | 0.9739 | [CX2H1]#[CX2H0][CX3H1]=[CX3H0]         | 0.0    |
| [CX3](=[OX1])C              | 0.9624 | [CX2H0](#[CX2H0])[CX2H0]               | 0.0    |
| [#7X3][#6H2]                | 0.9244 | C=CCC#C                                | 0.0    |
| [#7][#6H2]                  | 0.9039 | CC=CCC#C                               | 0.0    |
| [#6H3][#6][#6]              | 0.841  | [#6]1[#6]=[#6][#6][#6]=[#6]1           | 0.0    |
| [#6H2][#7][#6X3]            | 0.8402 | CC=CC#CC                               | 0.0    |
| [#7][#6][#6][#6X3]          | 0.8164 | [CX3H0](=[CX3H2])([CX4H3])[CX4H2]      | 0.0    |
| O=[CX3][CX4H]               | 0.787  | [CX3H1](=[CX3H2])[CX2H0]               | 0.0    |
| [#6H1]                      | 0.7465 | [#6X3H1]=[#6X3H1][#6X3H0]=[#6X3H1]     | 0.0    |
| worst negatives             | prob   | worst positives                        | prob   |
| [#7][#6][#6X3]              | 0.5961 | [CX4H2]([NX3H1])[CX4H1]                | 0.0431 |
| [#7X3H0]                    | 0.5931 | [CX3H0](=[OX1H0])([NX3H1])[CX4H1]      | 0.0633 |
| [CX3](=[OX1])O              | 0.4955 | [NH1][#6][#7]                          | 0.2195 |
| [#8]=[#6][#8]               | 0.4362 | [#7][#6H0][#7]                         | 0.3114 |
| O=[#6][#6][#6X3]            | 0.3658 | [CX4H1]([CX4H3])([CX4H2])[CX3H0]       | 0.3541 |
| [OX2H1]                     | 0.3606 | [OX1H0]=[CX3H0][CX4H1]([CX4H3])[CX4H2] | 0.3611 |
| [CX4H2][CX3]=O              | 0.3383 | [#7][#6][#6][#6][#7]                   | 0.4043 |
| [#7][#6][#6H3]              | 0.3324 | [#7][#6][#7]                           | 0.4481 |
| [#6H3][#6H1r5]              | 0.3066 | [#6H1][#6H2]                           | 0.4902 |
| [#8][#6H0][#6H1]            | 0.2849 | [#7X3H1]                               | 0.4976 |

---

Example 5 true smiles: Cc1c[nH]c(=O)[nH]c1=O formula: C5H6N2O2  
 Index of correct structure: 3 of 62260  
 True structure loss: 0.033961  
 True structure:

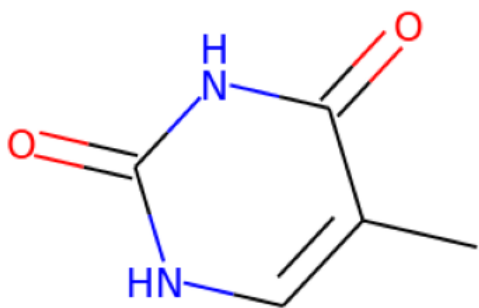

Experimental <sup>13</sup>C NMR (solvent: D2O)

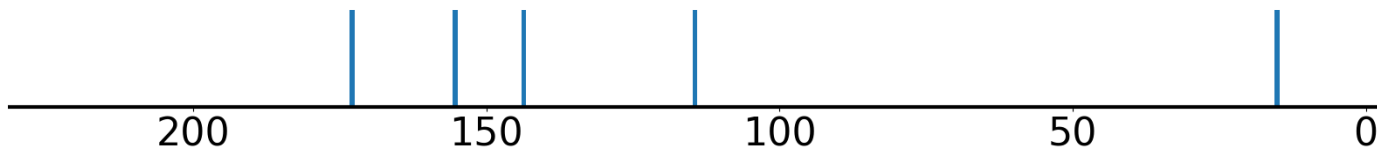

Experimental <sup>1</sup>H NMR (solvent: D2O)

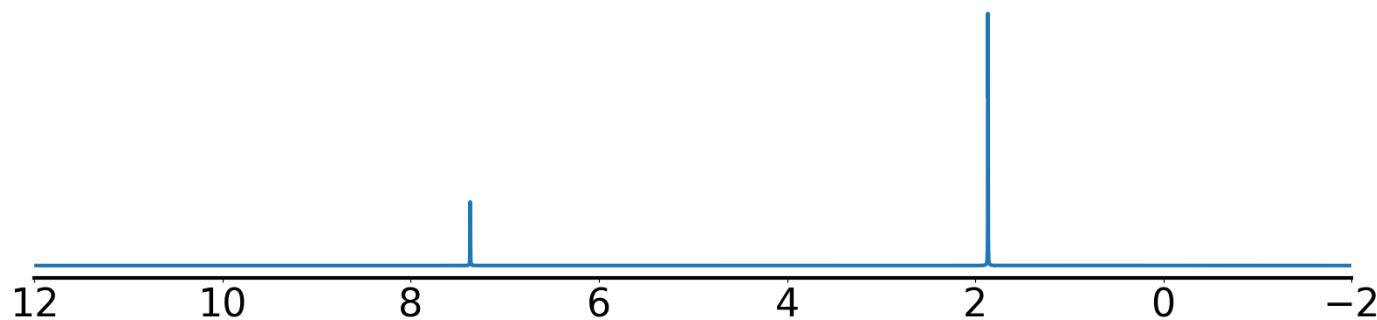

Top predicted structures (loss):

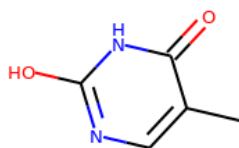

0.032831

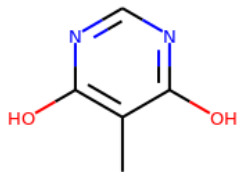

0.033598

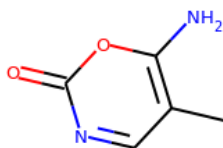

0.033841

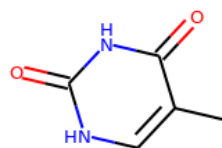

0.033961

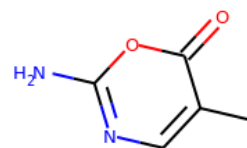

0.034243

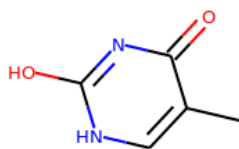

0.034362

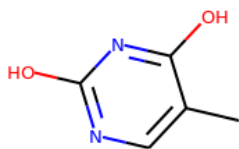

0.034596

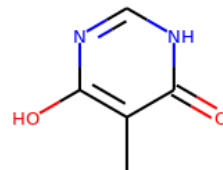

0.035597

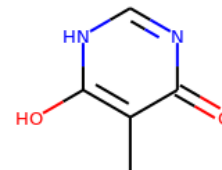

0.035597

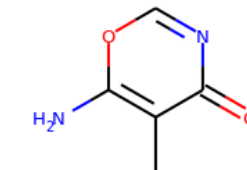

0.036021

|                                   |        |                                              |        |
|-----------------------------------|--------|----------------------------------------------|--------|
| Top predicted substructures       | prob   |                                              |        |
| [CX4H3]                           | 0.9999 | [#6H3][#6][#6]                               | 0.9771 |
| [CX4H3][#6]                       | 0.9993 | [#6H3][#6][#6X3]                             | 0.9423 |
| [#6H3][#6H0]                      | 0.9974 | [#7][#6][#6X3]                               | 0.9153 |
| [#6X3][#6X3]                      | 0.9956 | [cH]                                         | 0.8754 |
| [#6H1]                            | 0.978  | [CX4H3][cX3H0]                               | 0.7591 |
| best positives                    | prob   | best negatives                               | prob   |
| [CX4H3]                           | 0.9999 | [OX2H0][CX4H1][CX4H1]([CX4H2][CX4H1])[CX4H1] | 0.0    |
| [CX4H3][#6]                       | 0.9993 | [OX2H0]1[CX4H2][CX4H2][CX4H1][CX4H1]1        | 0.0    |
| [#6H3][#6H0]                      | 0.9974 | [CX2H0](#[CX2H1])[CX2H0]                     | 0.0    |
| [#6X3][#6X3]                      | 0.9956 | [CX4H1]1[CX4H2][CX4H1][CX4H2]1               | 0.0    |
| [#6H1]                            | 0.978  | [CX4H1]([OX2H1])([CX4H2])[CX2H0]             | 0.0    |
| [#6H3][#6][#6]                    | 0.9771 | [CX4H0]([CX4H2])([CX4H2])([CX4H1])[CX4H1]    | 0.0    |
| [#6H3][#6][#6X3]                  | 0.9423 | [OX1H0]=[CX3H0]1[CX4H1][CX4H1][CX4H2]1       | 0.0    |
| [#7][#6][#6X3]                    | 0.9153 | [OX2H1][CX4H2][CX4H1]([CX4H2])[CX4H2]        | 0.0    |
| [cH]                              | 0.8754 | [CX4H2]1[CX4H0][CX4H2][CX4H1]1               | 0.0    |
| [CX4H3][cX3H0]                    | 0.7591 | [OX2H0][CX4H2][CX4H1]([CX4H1])[CX4H1]        | 0.0    |
| worst negatives                   | prob   | worst positives                              | prob   |
| [CX3H0](=[CX3H1])([CX4H3])[CX3H0] | 0.6398 | [cX3H1]([nX3H1])[cX3H0]                      | 0.0863 |
| [CX4H3][CX3]                      | 0.5363 | [#7][#6H0][#7]                               | 0.1327 |
| [CX4H3][CX3H0]                    | 0.5285 | [#7H][#6X3H1]                                | 0.174  |
| [#8][#6][#6][#6X3]                | 0.5043 | [#7][#6][#6][#6][#7]                         | 0.21   |
| [#7X3H2]                          | 0.4588 | [#6H3][#6H0][#6H1][#7]                       | 0.2459 |
| [#8]=[#6][#8]                     | 0.4357 | [#7][#6][#7]                                 | 0.3164 |
| [OX1H0]=[CX3H0][CX3H0][CX4H3]     | 0.4099 | [#7X3H1]                                     | 0.3202 |
| [OX2H1]                           | 0.4051 | [#6X3][#7X3][#6X3]                           | 0.3724 |
| [#6H3][#6]=[#6X3]                 | 0.364  | [#6X3][#7][#6X3]                             | 0.4391 |
| [#7][#6H0][#6H1]                  | 0.3537 | O=[cX3]                                      | 0.4949 |

---

Example 6 true smiles: Cc1cc(C)nc(N)n1 formula: C6H9N3  
 Index of correct structure: 1 of 51623  
 True structure loss: 0.035975  
 True structure:

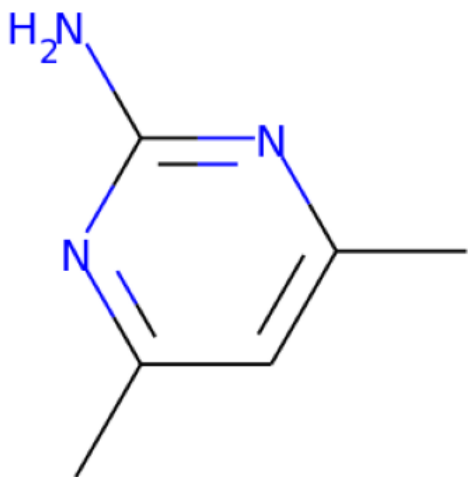

Experimental <sup>13</sup>C NMR (solvent: CDCl<sub>3</sub>)

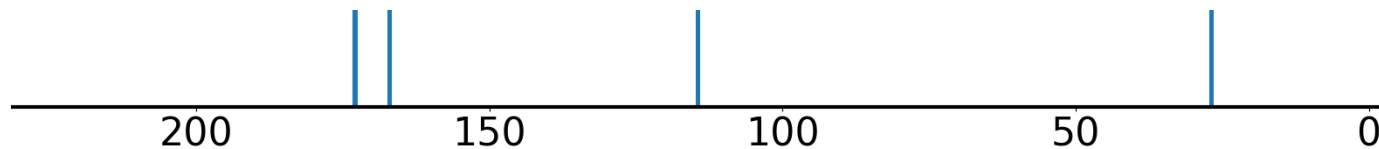

Experimental <sup>1</sup>H NMR (solvent: CDCl<sub>3</sub>)

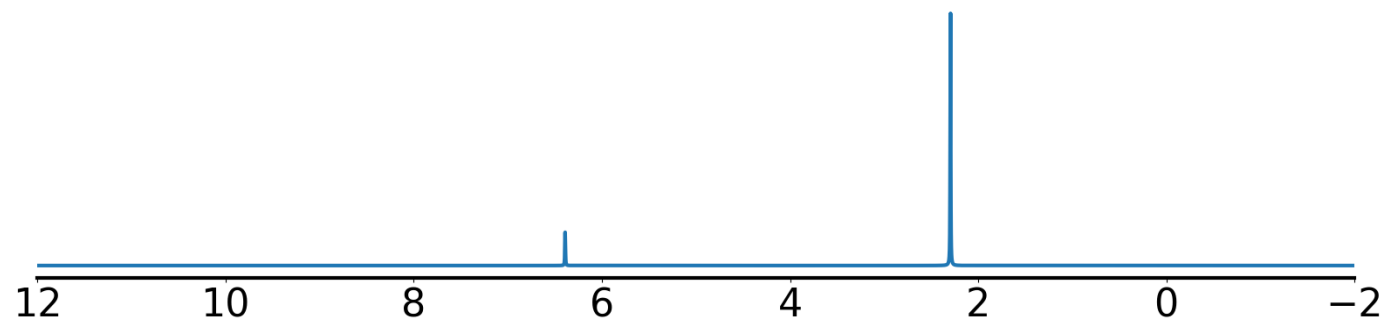

Top predicted structures (loss):

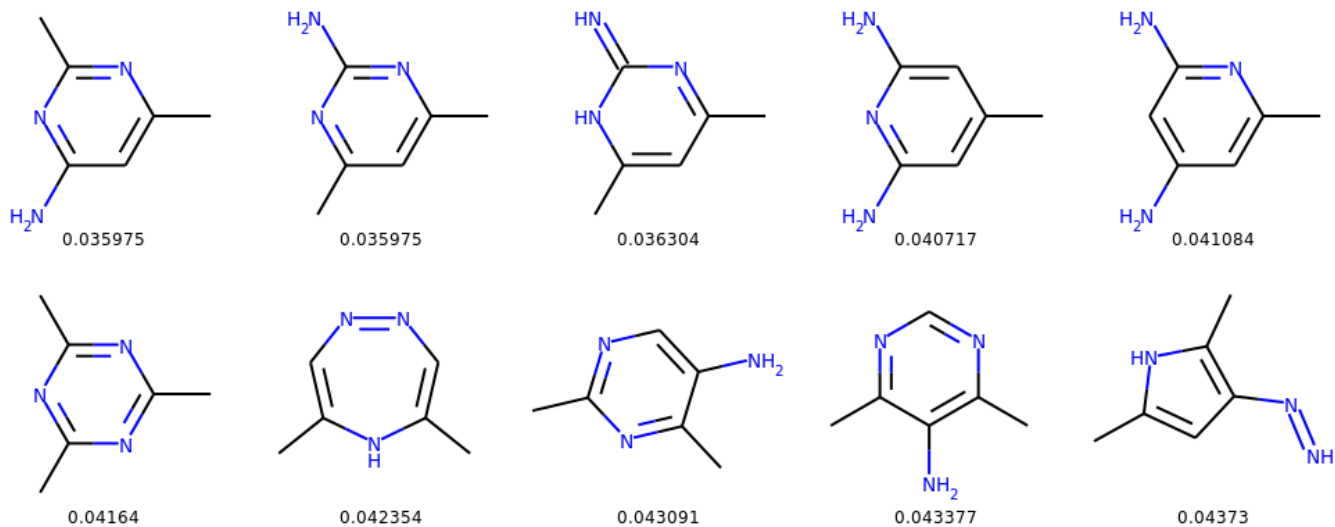

| Top predicted substructures | prob        |                                       |  |             |
|-----------------------------|-------------|---------------------------------------|--|-------------|
| [#6H3][#6H0]                | 0.9833      | [#7][#6][#6H3]                        |  | 0.8367      |
| [CX4H3]                     | 0.9427      | [#6X3H1][#6X3H0]                      |  | 0.8047      |
| [#7][#6][#6X3]              | 0.9397      | [CX4H3][#6]                           |  | 0.788       |
| [#6X3][#6X3]                | 0.9394      | [#7][#6H0]=[#7]                       |  | 0.7858      |
| [#6H1]                      | 0.8559      | [#6]=[#7H]                            |  | 0.72        |
| <b>best positives</b>       | <b>prob</b> | <b>best negatives</b>                 |  | <b>prob</b> |
| [#6H3][#6H0]                | 0.9833      | [OX2H0]1[CX4H2][CX4H2][CX4H1][CX4H1]1 |  | 0.0         |
| [CX4H3]                     | 0.9427      | [OX2H1][CX4H2][CX4H1]([OX2H0])[CX4H1] |  | 0.0         |
| [#7][#6][#6X3]              | 0.9397      | [OX2H0][CX4H2][CX4H1]([CX4H1])[CX4H1] |  | 0.0         |
| [#6X3][#6X3]                | 0.9394      | [OX2H1][CX4H1]1[CX4H1][CX4H2][CX4H1]1 |  | 0.0         |
| [#6H1]                      | 0.8559      | [OX2H0r5][CX4H2][OX2H0r5]             |  | 0.0         |
| [#7][#6][#6H3]              | 0.8367      | [OX2H1][CX4H1][CX4H1]([CX4H2])[CX4H2] |  | 0.0         |
| [#6X3H1][#6X3H0]            | 0.8047      | [OX2H0][CX3H1]=[#6X3H0][#8X2H0]       |  | 0.0         |
| [CX4H3][#6]                 | 0.788       | [OX2H0][CX4H2][CX4H2][CX4H1][OX2H0]   |  | 0.0         |
| [#7][#6X3H0][#6X3H1]        | 0.6724      | [OX2H0][CX4H2][CX4H0][OX2H0]          |  | 0.0         |
| [#7X3H2]                    | 0.665       | [CX4H1]([OX2H1])([CX4H2])[CX2H0]      |  | 0.0         |
| <b>worst negatives</b>      | <b>prob</b> | <b>worst positives</b>                |  | <b>prob</b> |
| [#7][#6H0]=[#7]             | 0.7858      | [#6H3][#6][#6X3]                      |  | 0.1936      |
| [#6]=[#7H]                  | 0.72        | [cX3H1]([cX3H0])[cX3H0]               |  | 0.1954      |
| [NH1]=[#6][#7]              | 0.6746      | [#7][#6][#6][#6][#7]                  |  | 0.254       |
| [CX4H3][CX3H0]              | 0.6368      | [#6X3][#6][#6][#6H3]                  |  | 0.2772      |
| [#7][#6]=[#7]               | 0.6093      | [#6H3][#6H0][#7H0][#6H0]              |  | 0.2874      |
| [#7X3H1]                    | 0.5878      | [CX4H3][cX3H0]                        |  | 0.3318      |
| [CHX3](=C)C                 | 0.48        | [#6X3][#7][#6X3]                      |  | 0.3394      |
| [#6X3H1]=[#6X3H0]           | 0.4224      | [#7][#6][#7]                          |  | 0.3575      |
| [cH][cH]                    | 0.3864      | [#6H3][#6][#6]                        |  | 0.3949      |
| [#6X3][#7X3][#6X3]          | 0.3835      | [#7][#6H0][#7]                        |  | 0.3971      |

---

Example 7 true smiles: O=C(O)C1CCCCN1 formula: C6H11NO2  
Index of correct structure: 0 of 35172  
True structure loss: 0.028661  
True structure:

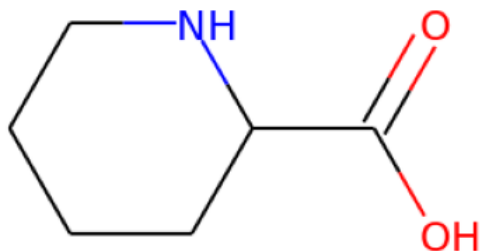

Experimental <sup>13</sup>C NMR (solvent: D<sub>2</sub>O)

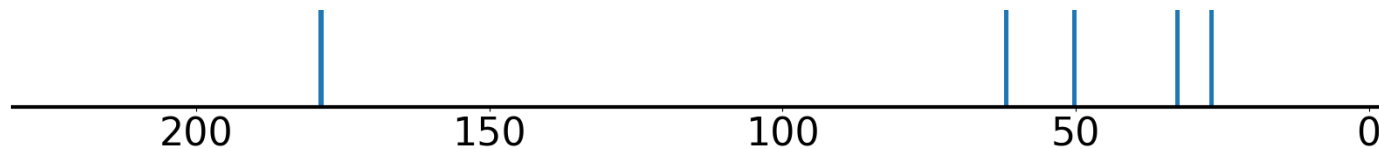

Experimental <sup>1</sup>H NMR (solvent: D<sub>2</sub>O)

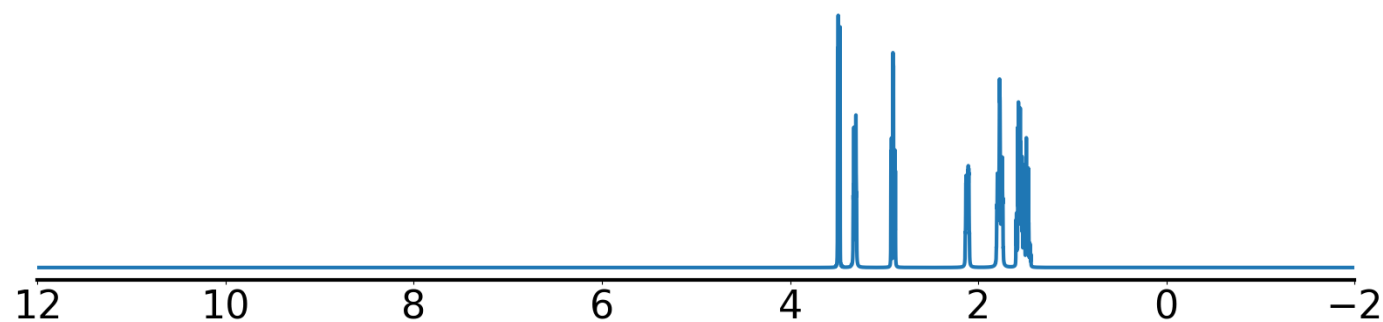

Top predicted structures (loss):

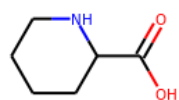

0.028661

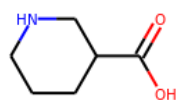

0.034049

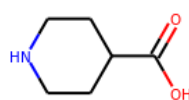

0.035513

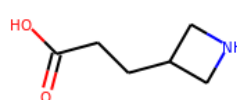

0.043542

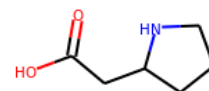

0.04653

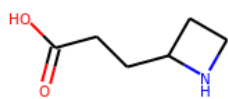

0.049435

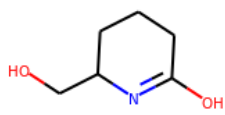

0.049899

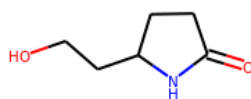

0.050267

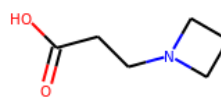

0.050356

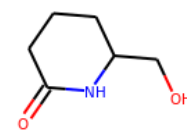

0.050651



|                             |        |                                   |        |
|-----------------------------|--------|-----------------------------------|--------|
| Top predicted substructures | prob   |                                   |        |
| [CX4H2]([#6])[#6]           | 0.9998 | OCC[CH2]                          | 0.9393 |
| [CX4H2]([CX4H2])[#6]        | 0.9892 | [#7][#6H2]                        | 0.9392 |
| [CX4H2]([CX4H2])[CX4H1]     | 0.9835 | [#6H1]                            | 0.9286 |
| [CX3](=[OX1])C              | 0.9721 | [OX2H1]                           | 0.909  |
| [CX4H2][CX4H2]              | 0.9464 | [#6H1][#6H2]                      | 0.8923 |
| [#7X3][#6H2]                |        |                                   |        |
| best positives              | prob   | best negatives                    | prob   |
| [CX4H2]([#6])[#6]           | 0.9998 | [CX2H1]#[CX2H0][CX3H1]=[CX3H0]    | 0.0    |
| [CX4H2]([CX4H2])[CX4H1]     | 0.9892 | [CX3H0](=[CX3H1])([OX2H0])[CX2H0] | 0.0    |
| [CX3](=[OX1])C              | 0.9835 | CC#CCC=C                          | 0.0    |
| [CX4H2][CX4H2]              | 0.9721 | [CX3H0](=[CX3H1])([CX4H2])[CX2H0] | 0.0    |
| [#7X3][#6H2]                | 0.9464 | [CX4H2]([CX4H3])[CX2H0]           | 0.0    |
| OCC[CH2]                    | 0.9393 | [CX2H0]([#CX2H1])[CX3H0]          | 0.0    |
| [#7][#6H2]                  | 0.9392 | C=CCCC#C                          | 0.0    |
| [#6H1]                      | 0.9286 | CC=CCC#C                          | 0.0    |
| [OX2H1]                     | 0.909  | C=CC=CC#C                         | 0.0    |
| [#6H1][#6H2]                | 0.8923 | [CX3H1](=[CX3H1])[CX2H0]          | 0.0    |
| worst negatives             | prob   | worst positives                   | prob   |
| [#7][#6H1][#6H2r5]          | 0.6369 | [CX4H1]([NX3H1])([CX4H2])[CX3H0]  | 0.0878 |
| [#8][#6][#6H2]              | 0.5651 | [#7H1][#6X4H1][#6X3]              | 0.1329 |
| [#6H1][#6H2][#6][#6][#7]    | 0.5252 | [#7][#6][#6X3]                    | 0.2719 |
| [CX4H2][CX3]=O              | 0.5189 | [#6][#6][#6][#6][#6][#7]1         | 0.3346 |
| [#6]1[#6][#6][#6][#7]1      | 0.5154 | [CX4H2][CX4H2][CX4H2][CX4H2]      | 0.3923 |
| [#6H1]([#6H2])[#6H2]        | 0.4658 | [#8][#6H0][#6H1]                  | 0.4241 |
| [#6H1r5][#7]                | 0.4086 | CCCCC                             | 0.4379 |
| [#7][#6H2][#6H1]            | 0.3915 | [#7][#6H2][#6H2]                  | 0.4389 |
| O=[CX3H0][CX4H2][CX4H2]     | 0.364  | [#7X3H1]                          | 0.4434 |
| [CX4H2]([CX4H2])[CX3H0]     | 0.3197 | [CX3](=[OX1])O                    | 0.5374 |

---

Example 8 true smiles: NCCCC(N)C(=O)O formula: C5H12N2O2  
 Index of correct structure: 0 of 32944  
 True structure loss: 0.02186  
 True structure:

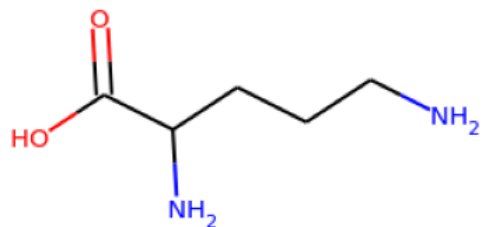

Experimental  $^{13}\text{C}$  NMR (solvent:  $\text{D}_2\text{O}$ )

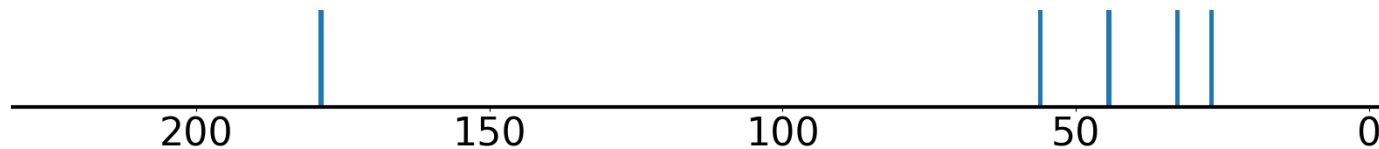

Experimental  $^1\text{H}$  NMR (solvent:  $\text{D}_2\text{O}$ )

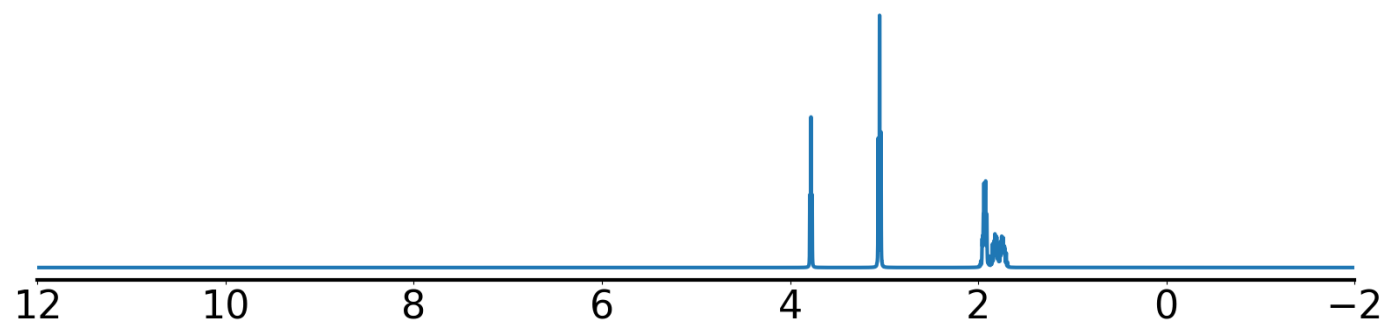

Top predicted structures (loss):

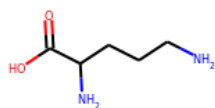

0.02186

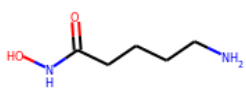

0.028496

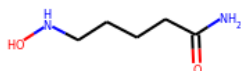

0.029016

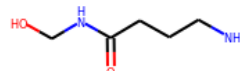

0.030358

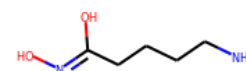

0.030825

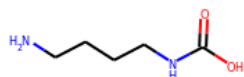

0.031303

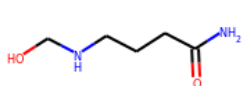

0.034377

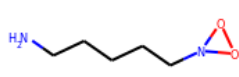

0.03841

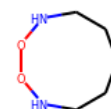

0.042354

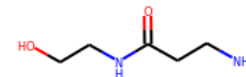

0.042625

|                              |        |                                   |        |
|------------------------------|--------|-----------------------------------|--------|
| Top predicted substructures  | prob   |                                   |        |
| [CX4H2]([#6])[#6]            | 0.9999 | [CX4H2][CX4H2]                    | 0.9618 |
| [#7X3H2]                     | 0.9906 | [#7][#6H2]                        | 0.9149 |
| [OX2H1]                      | 0.9859 | [CX4H2]CC=O                       | 0.9079 |
| [CX3](=[OX1])C               | 0.973  | [CX4H2]([CX4H2])[CX4H2]           | 0.899  |
| [#7][#6H2][#6H2]             | 0.9624 | [#7X3][#6H2]                      | 0.8755 |
| best positives               | prob   | best negatives                    | prob   |
| [CX4H2]([#6])[#6]            | 0.9999 | [CX2H1]#[CX2H0][CX3H1]=[CX3H0]    | 0.0    |
| [#7X3H2]                     | 0.9906 | [CX3H0](=[CX3H1])([CX4H2])[CX2H0] | 0.0    |
| [OX2H1]                      | 0.9859 | CCC=CC#C                          | 0.0    |
| [CX3](=[OX1])C               | 0.973  | [CX2H0](#[CX2H1])[CX4H2]          | 0.0    |
| [#7][#6H2][#6H2]             | 0.9624 | [CX2H0](#[CX2H1])[CX3H0]          | 0.0    |
| [CX4H2][CX4H2]               | 0.9618 | CC=CC#CC                          | 0.0    |
| [#7][#6H2]                   | 0.9149 | C=CCCC#C                          | 0.0    |
| [CX4H2]CC=O                  | 0.9079 | CCC#CC#C                          | 0.0    |
| [CX4H2]([CX4H2])[CX4H2]      | 0.899  | [CX2H0](#[CX2H0])[CX2H0]          | 0.0    |
| [#7X3][#6H2]                 | 0.8755 | CC=CCC#C                          | 0.0    |
| worst negatives              | prob   | worst positives                   | prob   |
| [CX4H2][CX3]=O               | 0.5232 | [#8][#6H0][#6H1]                  | 0.1534 |
| O=[CX3H0][CX4H2][CX4H2]      | 0.4807 | [#6H1][#6H2][#6][#6][#7]          | 0.2114 |
| [CX4H2][CX4H2][CX4H2][CX4H2] | 0.4418 | [#6H1][#6H2]                      | 0.2443 |
| [#7X3H1]                     | 0.4071 | [#7][#6][#6][#6][#6][#7]          | 0.2867 |
| [#8][#6][#6H2]               | 0.3773 | [CX3H0](=[OX1H0])([OX2H1])[CX4H1] | 0.3746 |
| [#7][#6][#6][#7]             | 0.3759 | [#6H1]                            | 0.3784 |
| [CX4H2]([NX3H1])[CX4H2]      | 0.3642 | [CX3](=[OX1])O                    | 0.521  |
| [#7H2][#6H0]                 | 0.3526 | [CX4H2]([CX4H2])[CX4H1]           | 0.6082 |
| [#7][#6][#6][#6][#7]         | 0.2537 | O=[CX3][CX4H]                     | 0.6101 |
| [#6H2][#7][#6X3]             | 0.2489 | [#7H2][#6H1]                      | 0.6526 |

---

Example 9 true smiles: Cn1ccc2ccccc21 formula: C9H9N  
Index of correct structure: 0 of 29511  
True structure loss: 0.013237  
True structure:

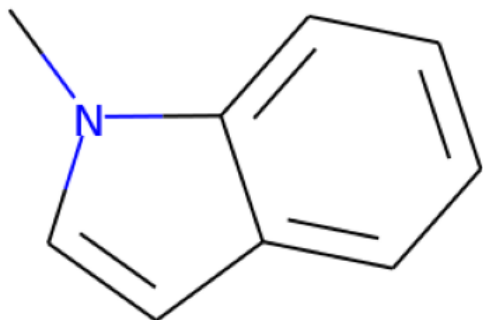

Experimental <sup>13</sup>C NMR (solvent: CDCl<sub>3</sub>)

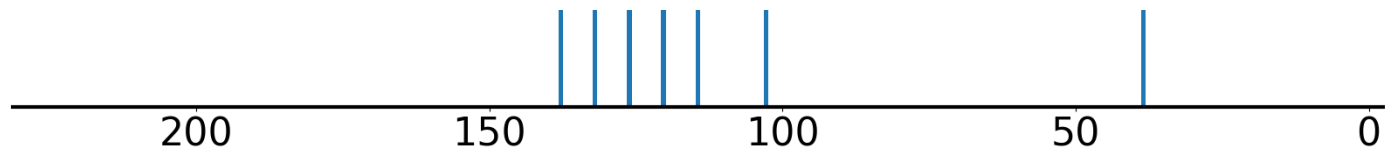

Experimental <sup>1</sup>H NMR (solvent: CD<sub>3</sub>OD)

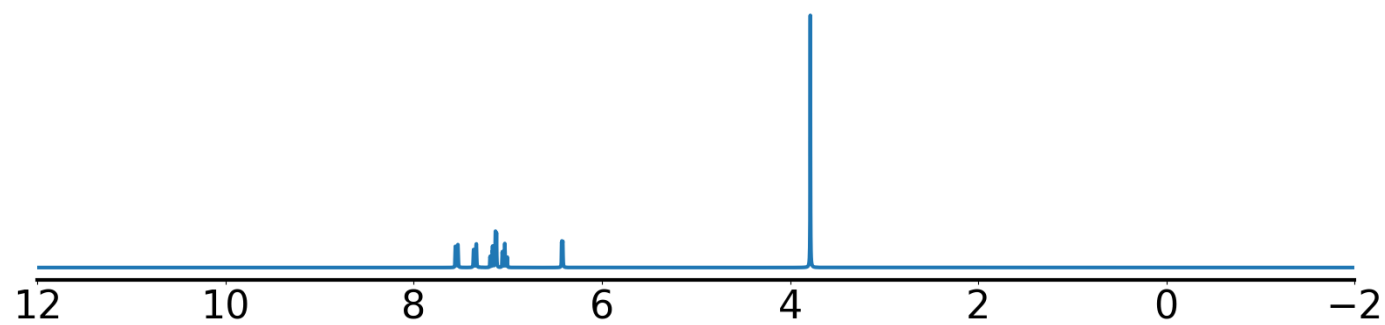

Top predicted structures (loss):

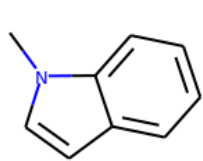

0.013237

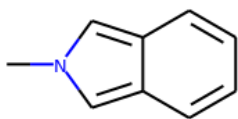

0.018262

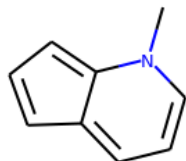

0.026289

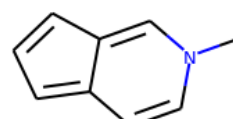

0.031304

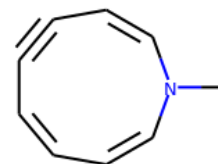

0.034869

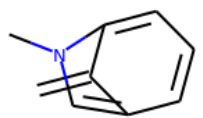

0.034901

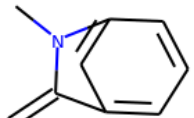

0.037159

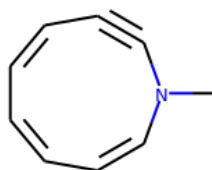

0.039331

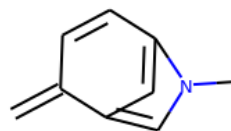

0.040262

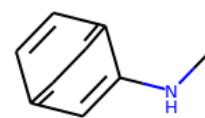

0.041778

|                             |        |                                           |        |
|-----------------------------|--------|-------------------------------------------|--------|
| Top predicted substructures | prob   |                                           |        |
| [#6H1]                      | 0.9999 | [cH][cH]                                  | 0.9938 |
| [#6X3][#6X3][#6X3][#6X3]    | 0.9981 | [#6X3H1][#6X3H0]                          | 0.9883 |
| [#7][#6][#6X3]              | 0.9977 | [cX3H1]([cX3H1])[cX3H0]                   | 0.9882 |
| [#6X3][#6X3]                | 0.9952 | [#7][#6][#6][#6X3]                        | 0.9819 |
| [cH]                        | 0.9945 | [#6H1][#6H1]                              | 0.9583 |
| best positives              | prob   | best negatives                            | prob   |
| [#6H1]                      | 0.9999 | [CX4H0]([OX2H1])([CX4H3])([CX4H2])[CX4H1] | 0.0    |
| [#6X3][#6X3][#6X3][#6X3]    | 0.9981 | [#8][#6H1][#6H2][#6H1]=[#8]               | 0.0    |
| [#7][#6][#6X3]              | 0.9977 | [OX2H0][CX4H2][CX4H2][CX4H1][OX2H0]       | 0.0    |
| [#6X3][#6X3]                | 0.9952 | [OX2H0]1[CX4H2][CX4H2][CX4H1][CX4H1]1     | 0.0    |
| [cH]                        | 0.9945 | [OX2H0]1[CX4H2][CX4H1][CX4H1]1            | 0.0    |
| [cH][cH]                    | 0.9938 | [OX2H0][CX4H2][CX4H1]([CX4H1])[CX4H3]     | 0.0    |
| [#6X3H1][#6X3H0]            | 0.9883 | [OX2H0]1[CX4H2][CX4H1]1[CX4H1]            | 0.0    |
| [cX3H1]([cX3H1])[cX3H0]     | 0.9882 | [CX4H0]([OX2H0])([CX4H3])([CX4H2])[CX4H1] | 0.0    |
| [#7][#6][#6][#6X3]          | 0.9819 | [CX4H1]([OX2H0])([CX4H3])[CX4H0]          | 0.0    |
| [#6H1][#6H1]                | 0.9583 | [OX2H1][CX4H0][CX4H1]([CX4H2])[CX4H1]     | 0.0    |
| worst negatives             | prob   | worst positives                           | prob   |
| [#6X3][#6H2][#6X3]          | 0.7329 | [#6]1[#6][#6][#6][#6]1                    | 0.2976 |
| [#6H1][#7][#6H1]            | 0.5529 | [cX3H1]([nX3H0])[cX3H1]                   | 0.5026 |
| [#7H][#6X3H1]               | 0.3855 | [#7][#6X3H0][#6X3H1]                      | 0.6196 |
| [cX3H1]([nX3H1])[cX3H1]     | 0.3189 | [CX4H3][nX3H0]                            | 0.6924 |
| [#7X3H1]                    | 0.3102 | [#6H3][#7]                                | 0.7252 |
| [#7][#6H2]                  | 0.2576 | [#6X3H1][#7X3H0]                          | 0.7276 |
| [#6]1[#6][#6][#6][#6][#7]1  | 0.2081 | [#6X3H1][#6X3H1][#6X3H0][#6X3H1]          | 0.731  |
| O=[#6][#6][#6X3]            | 0.1962 | [CX4H3]                                   | 0.7366 |
| [#6X3][#6H2][#7]            | 0.1776 | [#7][#6H0][#6H1]                          | 0.7521 |
| [cX3H1]([nX3H1])[cX3H0]     | 0.1684 | [#7X3][#6H3]                              | 0.7782 |

---

Example 10 true smiles: O=C1CCC(C(=O)O)N1 formula: C5H7NO3  
 Index of correct structure: 0 of 28551  
 True structure loss: 0.033519  
 True structure:

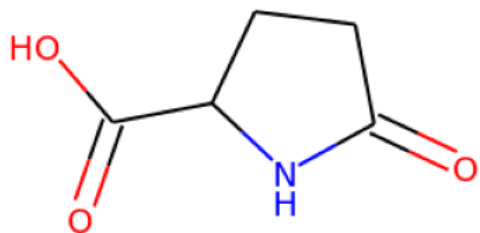

Experimental <sup>13</sup>C NMR (solvent: DMSO)

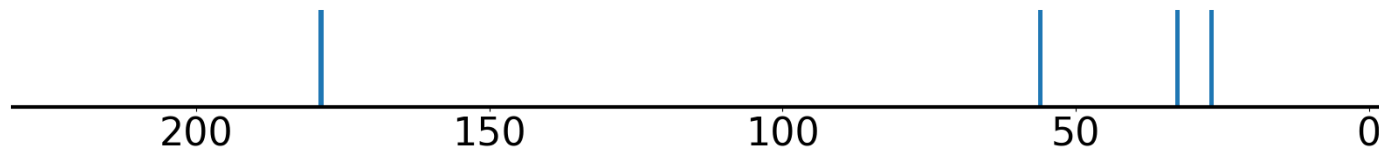

Experimental <sup>1</sup>H NMR (solvent: D2O)

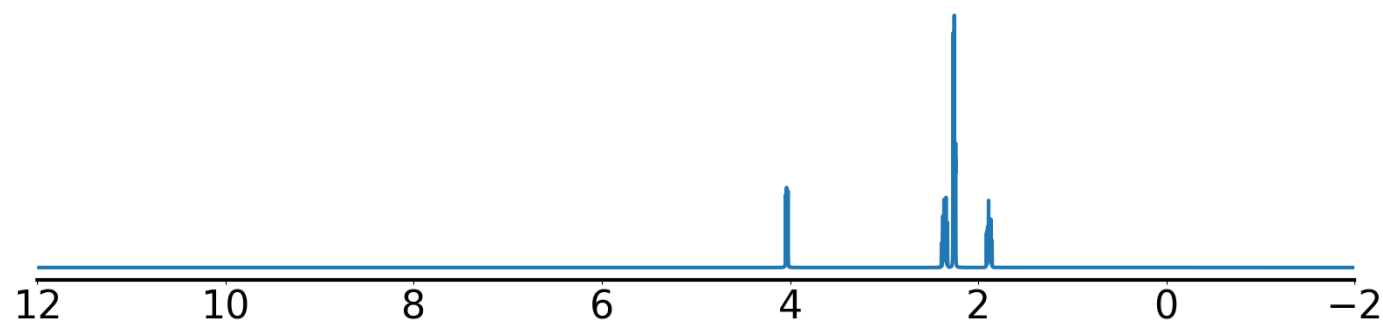

Top predicted structures (loss):

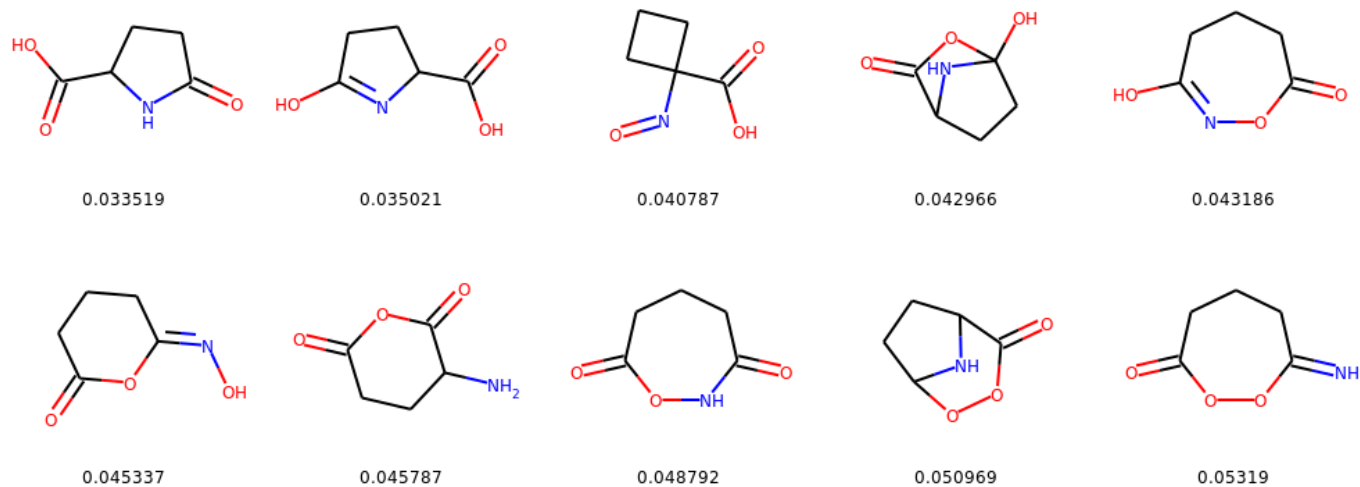

|                                  |        |                                    |        |
|----------------------------------|--------|------------------------------------|--------|
| Top predicted substructures      | prob   |                                    |        |
| [CX3](=[OX1])C                   | 0.9949 | [CX4H2]CC=O                        | 0.8911 |
| [CX4H2]([#6])[#6]                | 0.9872 | OCC[CH2]                           | 0.8885 |
| [#8]=[#6][#8]                    | 0.975  | [#6H1]                             | 0.8743 |
| [CX3](=[OX1])O                   | 0.9461 | [#6H1][#6H2]                       | 0.8295 |
| [OX2H1]                          | 0.8954 | [#7][#6][#6X3]                     | 0.7966 |
| best positives                   | prob   | best negatives                     | prob   |
| [CX3](=[OX1])C                   | 0.9949 | CC=CC#CC                           | 0.0    |
| [CX4H2]([#6])[#6]                | 0.9872 | [#6X3H1]=[#6X3H1][#6X3H0]=[#6X3H1] | 0.0    |
| [#8]=[#6][#8]                    | 0.975  | [CX3H0](=[CX3H2])([CX4H3])[CX4H0]  | 0.0    |
| [CX3](=[OX1])O                   | 0.9461 | [CX2H1]#[CX2H0][CX3H1]=[CX3H0]     | 0.0    |
| [OX2H1]                          | 0.8954 | CCC=CC#C                           | 0.0    |
| [CX4H2]CC=O                      | 0.8911 | CCC#CC=C                           | 0.0    |
| OCC[CH2]                         | 0.8885 | [#6X3H2]=[#6][#6H2][#8H]           | 0.0    |
| [#6H1]                           | 0.8743 | [#6H3][#6X3][#6X3]=[#6X3H2]        | 0.0    |
| [#6H1][#6H2]                     | 0.8295 | [CX3H0](=[CX3H1])([CX4H2])[CX2H0]  | 0.0    |
| [#7][#6][#6X3]                   | 0.7966 | [CX3H0](=[CX3H2])([CX4H3])[CX4H2]  | 0.0    |
| worst negatives                  | prob   | worst positives                    | prob   |
| [#6H1][#6H1]                     | 0.7038 | [CX3H0](=[OX1H0])([NX3H1])[CX4H2]  | 0.0664 |
| [#8][#6][#6][#6][#6]=[#8]        | 0.4216 | [#6]1[#6][#6][#6][#7]1             | 0.1477 |
| [CX4H](O)([CH])[CH]              | 0.4155 | [CX4H1]([NX3H1])([CX4H2])[CX3H0]   | 0.1642 |
| [#8][#6H1][#6H1]                 | 0.4011 | [#7H1][#6X4H1][#6X3]               | 0.1664 |
| [CX4H]O                          | 0.3761 | [#6H1r5][#7]                       | 0.252  |
| [#8][#6][#6H2]                   | 0.3638 | [CX3H0](=[OX1H0])([OX2H1])[CX4H1]  | 0.3141 |
| [#7X3H0]                         | 0.3569 | [#7X3H1]                           | 0.3602 |
| [CX4H1]([OX2H1])([CX4H1])[CX4H1] | 0.3542 | [CX4H2][CX3]=O                     | 0.4067 |
| [OX2H1][CX4H1]1[CX4H1][CX4H1]1   | 0.3382 | O=[CX3H0][CX4H2][CX4H2]            | 0.4439 |
| [#6]1[#6][#6][#6][#6][#7]1       | 0.3115 | [CX4H2]([CX4H2])[CX3H0]            | 0.4722 |

---

Example 11 true smiles: CC(=O)NCCCCN formula: C6H14N2O  
Index of correct structure: 0 of 22876  
True structure loss: 0.019508  
True structure:

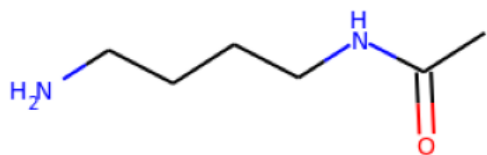

Experimental <sup>13</sup>C NMR (solvent: D<sub>2</sub>O)

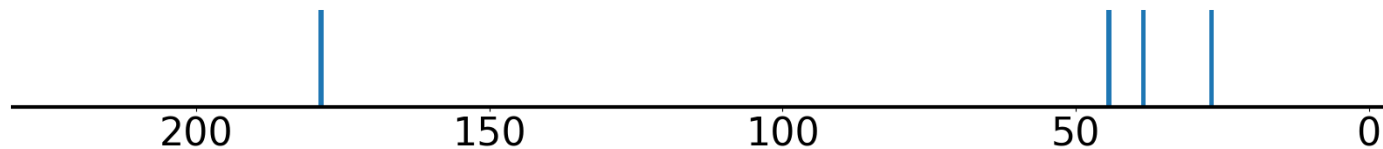

Experimental <sup>1</sup>H NMR (solvent: D<sub>2</sub>O)

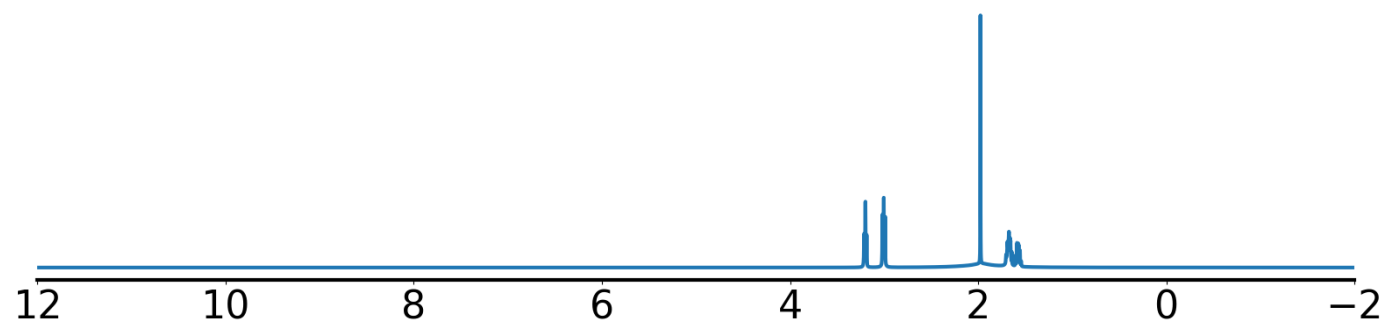

Top predicted structures (loss):

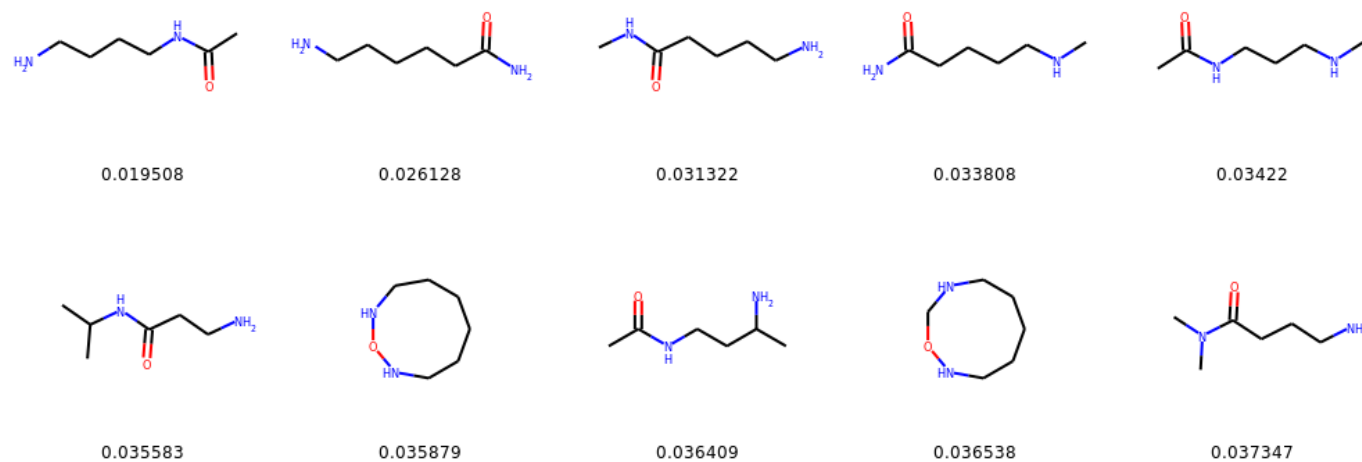



| Top predicted substructures | prob   |                                   |        |
|-----------------------------|--------|-----------------------------------|--------|
| [CX4H2]([#6])[#6]           | 0.9965 | [CX4H3]                           | 0.9361 |
| [#7X3][#6H2]                | 0.981  | [CX4H2][CX4H2]                    | 0.9265 |
| [#7][#6H2][#6H2]            | 0.9598 | [#7][#6H2]                        | 0.9    |
| [#7X3H2]                    | 0.9584 | [CX4H2]([NX3H2])[CX4H2]           | 0.883  |
| [CX3](=[OX1])C              | 0.9396 | [CX4H2]([CX4H2])[CX4H2]           | 0.8786 |
| best positives              | prob   | best negatives                    | prob   |
| [CX4H2]([#6])[#6]           | 0.9965 | [CX2H0](#[CX2H1])[CX3H0]          | 0.0    |
| [#7X3][#6H2]                | 0.981  | [CX3H0](=[CX3H1])([OX2H0])[CX2H0] | 0.0    |
| [#7][#6H2][#6H2]            | 0.9598 | C=CC=CC#C                         | 0.0    |
| [#7X3H2]                    | 0.9584 | [CX2H0](#[CX2H0])[CX2H0]          | 0.0    |
| [CX3](=[OX1])C              | 0.9396 | [CX2H1]#[CX2H0][CX3H1]=[CX3H0]    | 0.0    |
| [CX4H3]                     | 0.9361 | [CX3H0](=[CX3H1])([CX4H2])[CX2H0] | 0.0    |
| [CX4H2][CX4H2]              | 0.9265 | CC#CCC=C                          | 0.0    |
| [#7][#6H2]                  | 0.9    | [CX3H1](=[CX3H1])[CX2H0]          | 0.0    |
| [CX4H2]([NX3H2])[CX4H2]     | 0.883  | CC=CCC#C                          | 0.0    |
| [CX4H2]([CX4H2])[CX4H2]     | 0.8786 | [#6X2][#6H1][#6X2]                | 0.0    |
| worst negatives             | prob   | worst positives                   | prob   |
| [CX4H2][CX3]=O              | 0.6277 | [#7][#6][#6][#6][#6][#7]          | 0.2054 |
| [CX4H2]CC=O                 | 0.6044 | [CX4H2][CX4H2][CX4H2][CX4H2]      | 0.2632 |
| O=[CX3H0][CX4H2][CX4H2]     | 0.4071 | [CX4H2]([NX3H1])[CX4H2]           | 0.3182 |
| [#7H2][#6H0]                | 0.3995 | [#6H3][#6H0]                      | 0.4135 |
| [CX4H2]([CX4H2])[CX4H1]     | 0.3928 | [#7][#6][#6H3]                    | 0.4473 |
| [#6H1][#6H2]                | 0.3893 | [OX1H0]=[CX3H0][CX4H3]            | 0.4637 |
| [#6H3][#6][#6]              | 0.3394 | [#7X3H1]                          | 0.466  |
| [#6H1]                      | 0.3259 | [#6H2][#7][#6X3]                  | 0.5651 |
| [CX4H2]([CX4H2])[CX3H0]     | 0.3133 | [CX4H3][CX3]                      | 0.6452 |
| [#7][#6][#6][#6][#7]        | 0.3    | [CX4H3][CX3H0]                    | 0.6962 |

---

Example 12 true smiles: CC(C)(CC(=O)O)C(=O)O formula: C6H10O4  
 Index of correct structure: 0 of 19323  
 True structure loss: 0.018492  
 True structure:

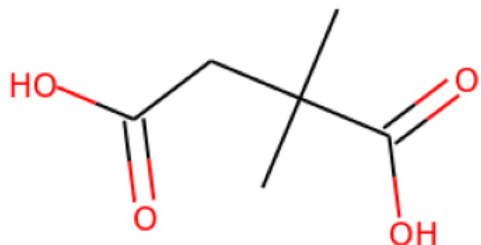

Experimental <sup>13</sup>C NMR (solvent: DMSO)

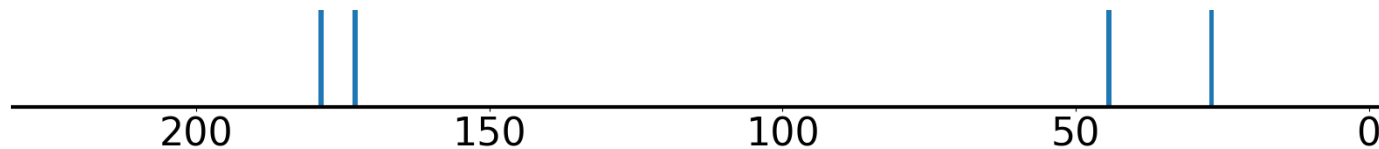

Experimental <sup>1</sup>H NMR (solvent: D2O)

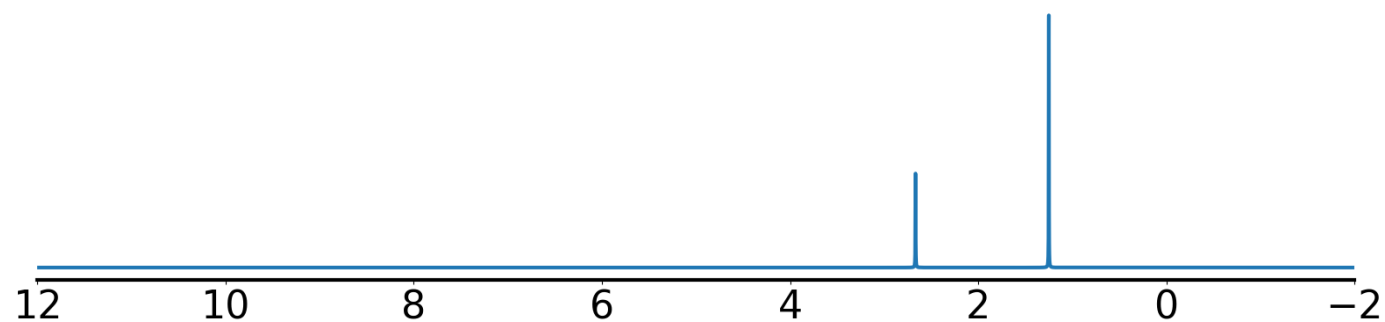

Top predicted structures (loss):

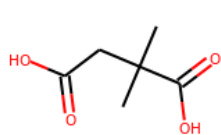

0.018492

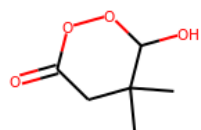

0.04651

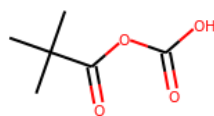

0.047561

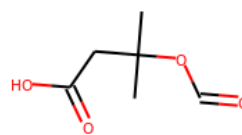

0.050277

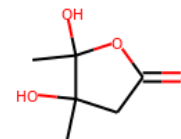

0.050498

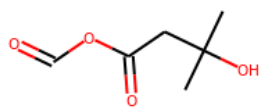

0.051003

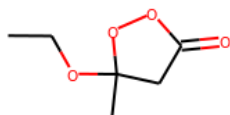

0.051862

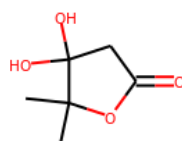

0.052008

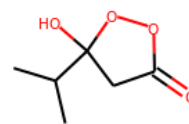

0.054245

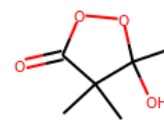

0.057978

| Top predicted substructures     | prob        |                                  |             |
|---------------------------------|-------------|----------------------------------|-------------|
| [#8]=[#6][#8]                   | 1.0         | [CX3](=O)[OX2H1]                 | 0.9954      |
| [CX3](=[OX1])O                  | 1.0         | [OX1H0]=[CX3H0]([#8])[CX4H2]     | 0.9932      |
| [#6H3][#6][#6]                  | 0.9998      | [CX4H2]([#6])[#6]                | 0.9904      |
| [CX3](=[OX1])C                  | 0.9997      | [CX4H3][CX4H0]                   | 0.9884      |
| [CX4H3]                         | 0.9996      | [#6H3][#6H0]                     | 0.9853      |
| <b>best positives</b>           | <b>prob</b> | <b>best negatives</b>            | <b>prob</b> |
| [#8]=[#6][#8]                   | 1.0         | C=CC=CC#C                        | 0.0         |
| [CX3](=[OX1])O                  | 1.0         | [#6X2][#6H1][#6X2]               | 0.0         |
| [#6H3][#6][#6]                  | 0.9998      | CC#CCC#C                         | 0.0         |
| [CX3](=[OX1])C                  | 0.9997      | [CX3H0]([#6H1])([OX2H0])[CX2H0]  | 0.0         |
| [CX4H3]                         | 0.9996      | CCC#CC#C                         | 0.0         |
| [CX3](=O)[OX2H1]                | 0.9954      | [CX2H1]#[CX2H0][CX3H1]=[CX3H0]   | 0.0         |
| [OX1H0]=[CX3H0]([#8])[CX4H2]    | 0.9932      | [CX2H0]([#6H1])[CX4H0]           | 0.0         |
| [CX4H2]([#6])[#6]               | 0.9904      | CCC=CC#C                         | 0.0         |
| [CX4H3][CX4H0]                  | 0.9884      | [CX4H1]([CX4H1])([CX4H1])[CX2H0] | 0.0         |
| [#6H3][#6H0]                    | 0.9853      | CC=CCC#C                         | 0.0         |
| <b>worst negatives</b>          | <b>prob</b> | <b>worst positives</b>           | <b>prob</b> |
| [OX2H0][CX3H0][CX4H2]           | 0.6632      | [#8][#6][#6][#6][#8]             | 0.1451      |
| [CX3H0]([#6H1])([OX2H0])[CX4H2] | 0.5578      | [#8][#6][#6][#6][#6]=[#8]        | 0.1897      |
| [#8][#6][#6][#6X3]              | 0.4815      | [CH3]CC[OH]                      | 0.2266      |
| [#8]=[#6][#6H2][#6H1]           | 0.2654      | [CX4H2]CC=O                      | 0.2849      |
| [#6H1]                          | 0.2399      | [#8]=[#6][#6][#6][#6]=[#8]       | 0.3414      |
| [#6X3][#6H2][#6X3]              | 0.2339      | [OX1H0]=[CX3H0][CX4H0][CX4H3]    | 0.3519      |
| [CH3][#6][#8]                   | 0.1937      | [#6H3][#6][#6X3]                 | 0.4082      |
| [CX3H0]([#6H1])([OX2H1])[CX4H1] | 0.1861      | OCC[CH2]                         | 0.514       |
| [CX4H3][CX4]O                   | 0.1801      | [OX1H0]=[CX3H0][CX4H2][CX4H0]    | 0.6716      |
| [CX3H0]([#6H1])([OX2H1])[CX3H0] | 0.1433      | [CX4H3][CX4H0][CX4H3]            | 0.7456      |

---

Example 13 true smiles: O=C(O)c1ccccc1O formula: C7H6O3  
Index of correct structure: 0 of 15458  
True structure loss: 0.016306  
True structure:

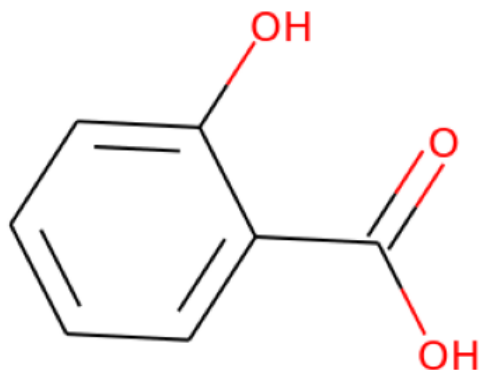

Experimental <sup>13</sup>C NMR (solvent: N/A)

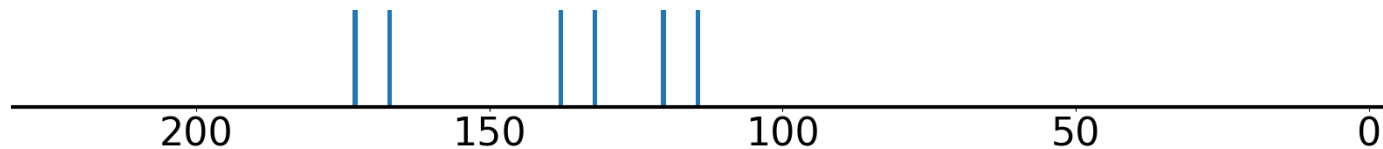

Experimental <sup>1</sup>H NMR (solvent: D2O)

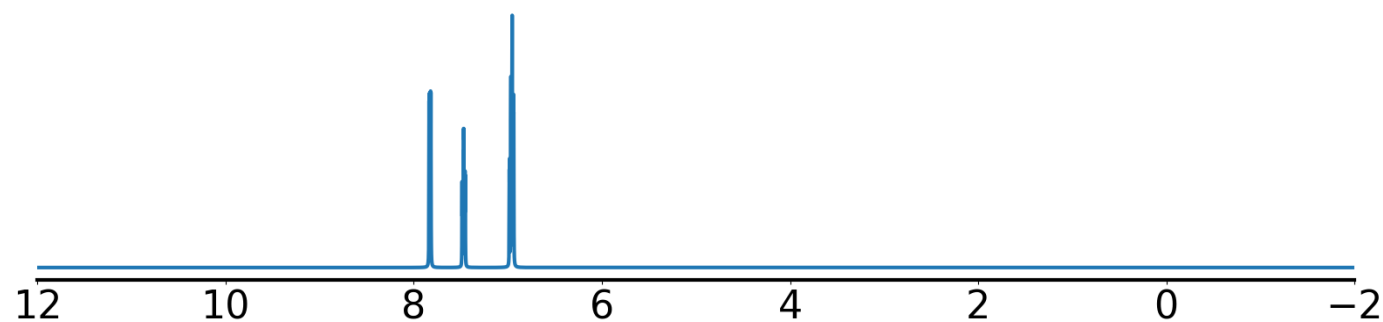

Top predicted structures (loss):

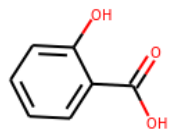

0.016306

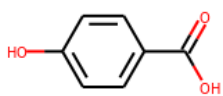

0.016401

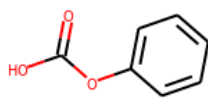

0.017178

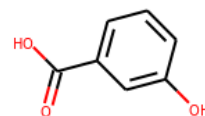

0.023257

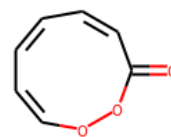

0.023758

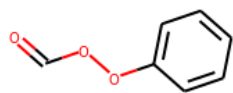

0.028966

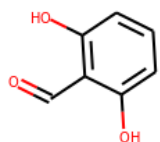

0.030215

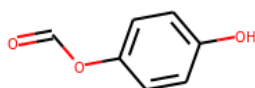

0.03252

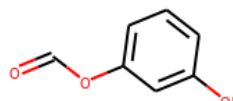

0.033484

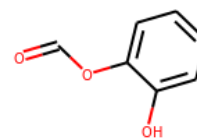

0.033797

| Top predicted substructures      | prob   |                                           |        |
|----------------------------------|--------|-------------------------------------------|--------|
| [#6H1]                           | 0.9999 | [#6X3H1][#6X3H0]                          | 0.99   |
| [#6X3][#6X3]                     | 0.9998 | [cX3H1]([cX3H1])[cX3H0]                   | 0.9856 |
| [cH][cH]                         | 0.9968 | O=[#6][#6][#6X3]                          | 0.9786 |
| [#6X3][#6X3][#6X3][#6X3]         | 0.9952 | [CX3](=[OX1])O                            | 0.9734 |
| [#8]=[#6][#8]                    | 0.9925 | [cH]                                      | 0.9489 |
|                                  |        |                                           |        |
| best positives                   | prob   | best negatives                            | prob   |
| [#6H1]                           | 0.9999 | [CX4H0]([NX3H1])([CX4H2])([CX4H2])[CX4H1] | 0.0    |
| [#6X3][#6X3]                     | 0.9998 | [#6H3][#7][#6X4H1][#6H3]                  | 0.0    |
| [cH][cH]                         | 0.9968 | [OX2H0]1[CX4H2][CX4H2][CX4H1][CX4H1]1     | 0.0    |
| [#6X3][#6X3][#6X3][#6X3]         | 0.9952 | [CX4H1]([NX3H1])([CX4H3])[CX4H2]          | 0.0    |
| [#8]=[#6][#8]                    | 0.9925 | [CX4H1]([NX3H2])([CX4H2])[CX3H1]          | 0.0    |
| [#6X3H1][#6X3H0]                 | 0.99   | [CX4H0]([NX3H1])([CX4H3])([CX4H2])[CX4H1] | 0.0    |
| [cX3H1]([cX3H1])[cX3H0]          | 0.9856 | [CX4H1]([NX3H2])([CX4H2])[CX4H0]          | 0.0    |
| O=[#6][#6][#6X3]                 | 0.9786 | [CX4H0]([NX3H2])([CX4H2])([CX4H1])[CX4H1] | 0.0    |
| [CX3](=[OX1])O                   | 0.9734 | [CX4H1]([NX3H0])([CX4H2])[CX4H0]          | 0.0    |
| [cH]                             | 0.9489 | [CX4H2]([NX3H0])[CX4H3]                   | 0.0    |
|                                  |        |                                           |        |
| worst negatives                  | prob   | worst positives                           | prob   |
| [#8]=[#6][#6H1][#6H1]            | 0.6906 | [cX3H0]([cX3H1])([cX3H0])[OX2H1]          | 0.1005 |
| [OX1H0]=[cX3H0][cX3H1]           | 0.6486 | [OX2H][cX3]:[c]                           | 0.4525 |
| [#6X3H1][#6X3H1][#6X3H0][#6X3H1] | 0.6475 | [cH]cO                                    | 0.4689 |
| [#8]=[#6H0][#6H1]                | 0.6392 | [#6]1[#6][#6][#6][#6]1                    | 0.5237 |
| O=[cX3]                          | 0.6267 | [CX3](=O)[OX2H1]                          | 0.7912 |
| [CX3](=[OX1])C                   | 0.5293 | [OX2H1]                                   | 0.8534 |
| [#8][#6H1][#6H1]                 | 0.4076 | [#6H1][#6H1]                              | 0.8561 |
| [cX3H0][cX3H1][cX3H1][cX3H0]     | 0.3796 | [#8][#6][#6][#6X3]                        | 0.8807 |
| [cX3H1]([cX2H0])[cX3H1]          | 0.1907 | [#8][#6H0][#6H1]                          | 0.8978 |
| [#8][#6][#6][#6][#6]=[#8]        | 0.1862 | [cX3H1]([cX3H1])[cX3H1]                   | 0.9167 |

---

Example 14 true smiles: CCCCC(N)C(=O)O formula: C6H13NO2  
Index of correct structure: 0 of 14628  
True structure loss: 0.01752  
True structure:

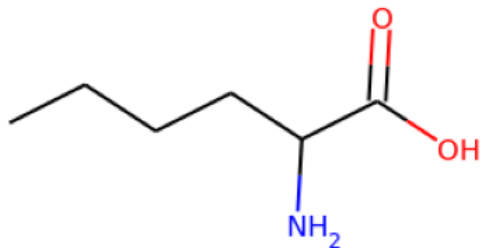

Experimental <sup>13</sup>C NMR (solvent: D<sub>2</sub>O)

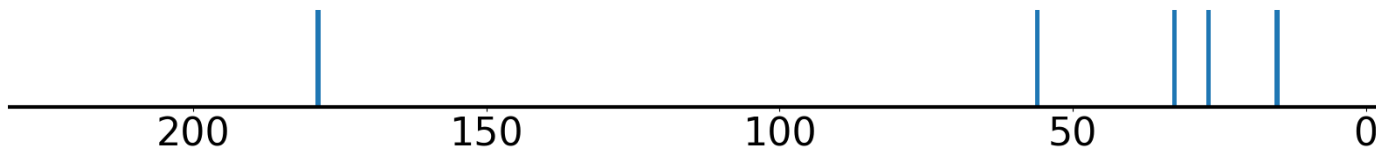

Experimental <sup>1</sup>H NMR (solvent: D<sub>2</sub>O)

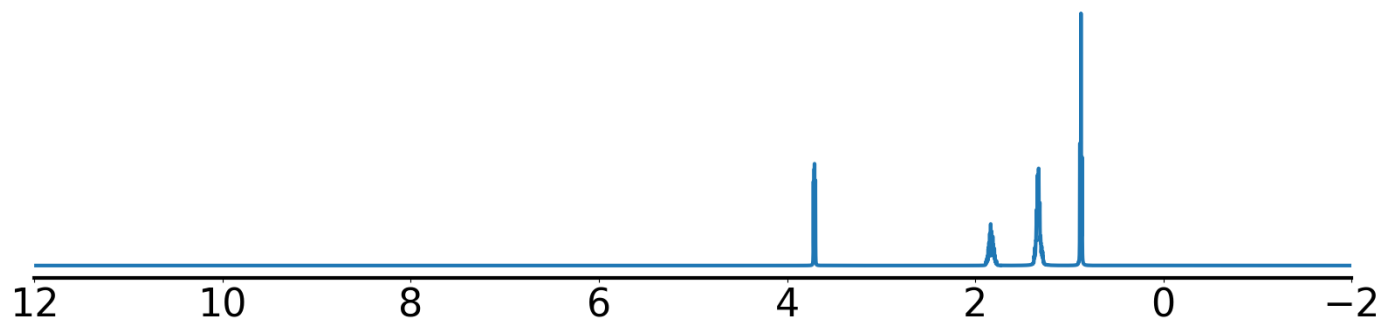

Top predicted structures (loss):

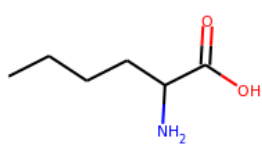

0.01752

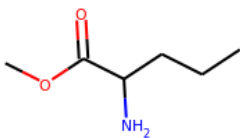

0.030179

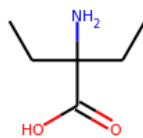

0.033519

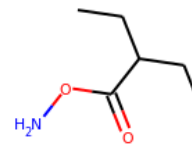

0.035605

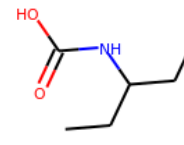

0.041748

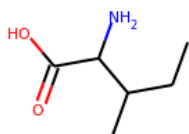

0.043004

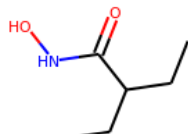

0.046331

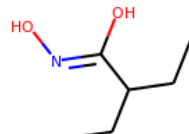

0.050592

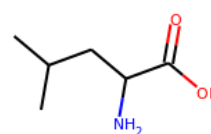

0.0525

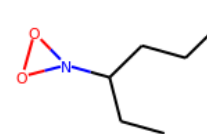

0.052515

|                             |        |                                   |        |
|-----------------------------|--------|-----------------------------------|--------|
| Top predicted substructures | prob   |                                   |        |
| [CX4H2]([#6])[#6]           | 0.9999 | [CX3](=[OX1])C                    | 0.9855 |
| [CX4H3]                     | 0.9994 | [#7X3H2]                          | 0.9563 |
| [CX4H3][CX4H2]              | 0.999  | [#8]=[#6][#8]                     | 0.9523 |
| [#6H3][#6][#6]              | 0.9988 | O=[CX3][CX4H]                     | 0.9346 |
| [CX4H3][#6]                 | 0.9934 | [OX2H1]                           | 0.9136 |
| best positives              | prob   | best negatives                    | prob   |
| [CX4H2]([#6])[#6]           | 0.9999 | [CX2H0](#[CX2H1])[CX3H0]          | 0.0    |
| [CX4H3]                     | 0.9994 | [CX2H1]#[CX2H0][CX3H1]=[CX3H0]    | 0.0    |
| [CX4H3][CX4H2]              | 0.999  | C=CC=CC#C                         | 0.0    |
| [#6H3][#6][#6]              | 0.9988 | [CX2H0](#[CX2H1])[CX4H0]          | 0.0    |
| [CX4H3][#6]                 | 0.9934 | [CX3H0](=[CX3H1])([CX4H2])[CX2H0] | 0.0    |
| [CX3](=[OX1])C              | 0.9855 | [CX3H0](=[CX3H1])([OX2H0])[CX2H0] | 0.0    |
| [#7X3H2]                    | 0.9563 | CCC#CC#C                          | 0.0    |
| [#8]=[#6][#8]               | 0.9523 | CC=CCC#C                          | 0.0    |
| O=[CX3][CX4H]               | 0.9346 | CC#CCC=C                          | 0.0    |
| [OX2H1]                     | 0.9136 | [CX2H0](#[CX2H1])[CX4H2]          | 0.0    |
| worst negatives             | prob   | worst positives                   | prob   |
| [CX4H2]([CX4H3])[CX4H1]     | 0.785  | CCCCC                             | 0.1261 |
| [#6X3][#6][#6][#6H3]        | 0.587  | [#8][#6H0][#6H1]                  | 0.2354 |
| [#7H2][#6H0]                | 0.5192 | [CX4H2]([CX4H2])[CX4H2]           | 0.2711 |
| [#8]=[#6][#6H1][#6H1]       | 0.2955 | [CX4H2][CX4H2]                    | 0.3609 |
| [#7][#6H0][#6H1]            | 0.2873 | [CX4H2]([CX4H2])[CX4H1]           | 0.4169 |
| [#8][#6][#6H2]              | 0.2732 | [CX4H2]([CX4H3])[CX4H2]           | 0.513  |
| [#6H3][#6H2][#6H1][#7]      | 0.1774 | [CX3H0](=[OX1H0])([OX2H1])[CX4H1] | 0.5782 |
| [#7X3H1]                    | 0.1619 | [#7][#6][#6X3]                    | 0.6265 |
| [CX4H2][CX3]=O              | 0.1269 | OCC[CH2]                          | 0.7336 |
| [OH][CX4H]                  | 0.0816 | [#7H2][#6H1]                      | 0.777  |

---

Example 15 true smiles: O=C(O)C=CC=CC(=O)O formula: C6H6O4  
 Index of correct structure: 0 of 14419  
 True structure loss: 0.027355  
 True structure:

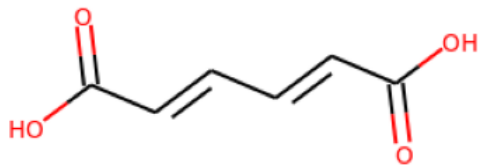

Experimental <sup>13</sup>C NMR (solvent: DMSO)

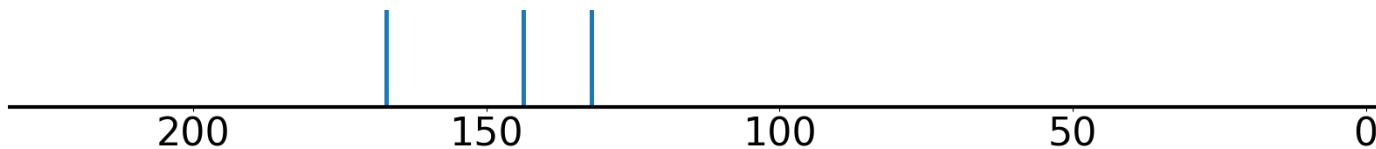

Experimental <sup>1</sup>H NMR (solvent: #N/A)

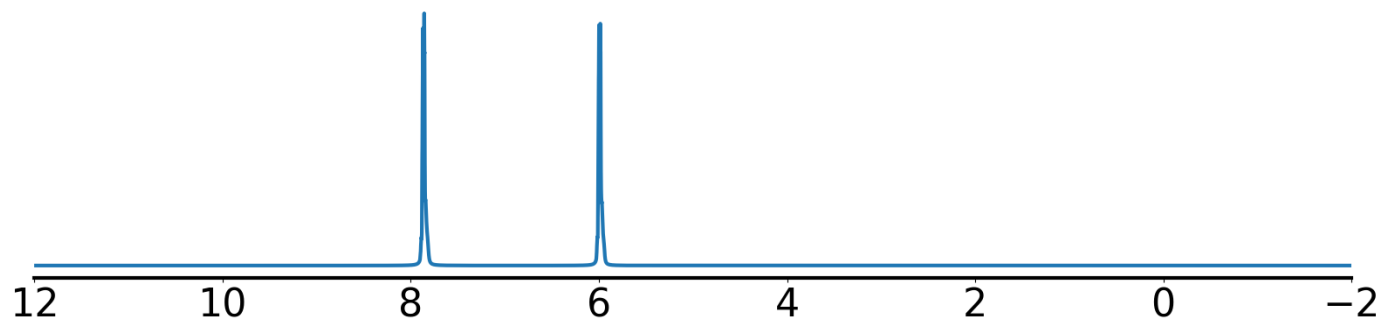

Top predicted structures (loss):

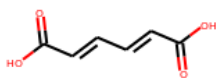

0.027355

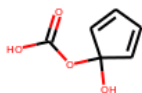

0.041066

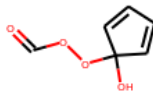

0.047702

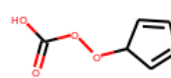

0.051506

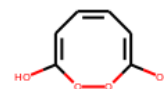

0.05409

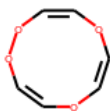

0.054502

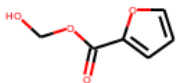

0.054963

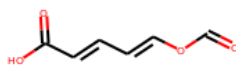

0.055276

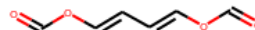

0.056261

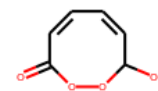

0.058764



| Top predicted substructures       | prob        |                                       | prob        |
|-----------------------------------|-------------|---------------------------------------|-------------|
| [#6H1]                            | 0.9999      | [OX2H1]                               | 0.8686      |
| [#6X3][#6X3]                      | 0.9978      | [CHX3]=[CHX3]                         | 0.8266      |
| [#8]=[#6][#8]                     | 0.9977      | [#6H1][#6H1]                          | 0.818       |
| [CX3](=[OX1])O                    | 0.9953      | O=[#6][#6]=[#6X3]                     | 0.6731      |
| [CHX3](=C)C                       | 0.9616      | [#6X3H1][#6X3H0]                      | 0.673       |
| <b>best positives</b>             | <b>prob</b> | <b>best negatives</b>                 | <b>prob</b> |
| [#6H1]                            | 0.9999      | [OX2H0]1[CX4H2][CX4H2][CX4H1][CX4H1]1 | 0.0         |
| [#6X3][#6X3]                      | 0.9978      | [CX2H0](#[CX2H1])[CX3H0]              | 0.0         |
| [#8]=[#6][#8]                     | 0.9977      | [CX3H0](=[CX3H1])([CX4H2])[CX2H0]     | 0.0         |
| [CX3](=[OX1])O                    | 0.9953      | [#7][#6][#6][#6]#[#7]                 | 0.0         |
| [CHX3](=C)C                       | 0.9616      | [#6H3][#6H0][#7][#6H3]                | 0.0         |
| [OX2H1]                           | 0.8686      | [#6H3][#7][#6X4H1][#6H3]              | 0.0         |
| [CHX3]=[CHX3]                     | 0.8266      | [#7][#6H1][#6X2]                      | 0.0         |
| [#6H1][#6H1]                      | 0.818       | [CX4H2]([NX3H0])[CX4H3]               | 0.0         |
| O=[#6][#6]=[#6X3]                 | 0.6731      | [#7][#6][#6]#[#7]                     | 0.0         |
| [#6X3H1][#6X3H0]                  | 0.673       | [#6H3][#7][#7]                        | 0.0         |
| <b>worst negatives</b>            | <b>prob</b> | <b>worst positives</b>                | <b>prob</b> |
| [#8][#6H1][#6H1]                  | 0.3944      | CC=CC=CC                              | 0.0026      |
| [#8][#6][#6][#8]                  | 0.3279      | [#6X3]=[#6X3][#6X3]=[#6X3]            | 0.0431      |
| [#8][#6][#6]=[#6][#6][#8]         | 0.3082      | [CX3H1](=[CX3H1])[CX3H1]              | 0.157       |
| [CX3H][CX4H]                      | 0.2747      | [CX3H1](=[CX3H1])[CX3H0]              | 0.1874      |
| [CX3H1](=[CX3H1])[CX4H1]          | 0.2425      | [OX1H0]=[CX3H0][CX3H1]=[CX3H1]        | 0.2496      |
| [CX4H](O)([CH])[CH]               | 0.2182      | [#6X3][#6X3]=[#6X3][#6X3]             | 0.2813      |
| [#8][#6][#6][#6X3]                | 0.2066      | [#8]=[#6][#6H1]=[#6H1]                | 0.4025      |
| [CX4H]O                           | 0.1636      | [#8]=[#6H0][#6H1]                     | 0.4633      |
| O=[#6][#6][#6X3]                  | 0.149       | [#8][#6H0][#6H1]                      | 0.4713      |
| [CX3H0](=[OX1H0])([OX2H1])[CX3H0] | 0.1391      | [CX3](=[OX1])C                        | 0.5366      |

---

Example 16 true smiles: O=C(O)c1ccc(CO)ol formula: C6H6O4  
 Index of correct structure: 5 of 14419  
 True structure loss: 0.027503  
 True structure:

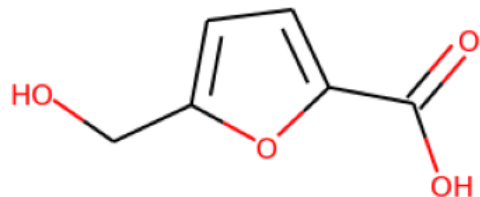

Experimental <sup>13</sup>C NMR (solvent: Acetone-d<sub>6</sub>)

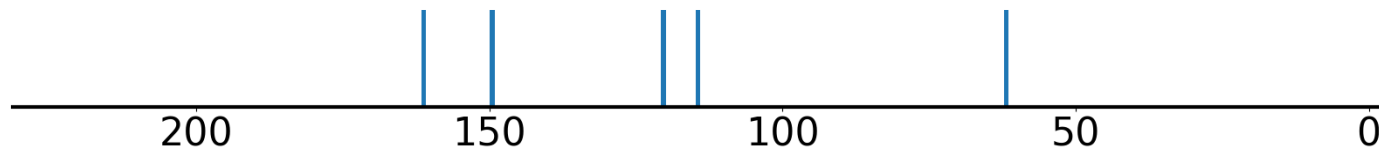

Experimental <sup>1</sup>H NMR (solvent: D<sub>2</sub>O)

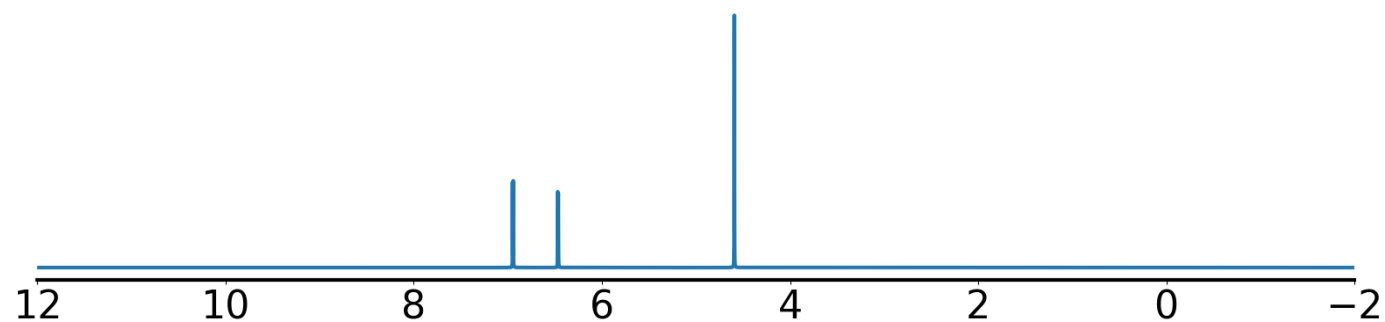

Top predicted structures (loss):

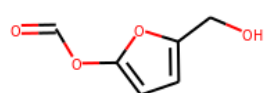

0.023982

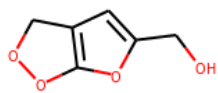

0.025608

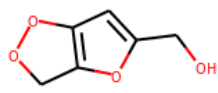

0.027161

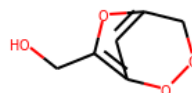

0.027161

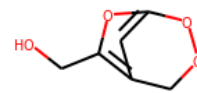

0.027475

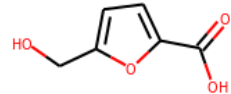

0.027503

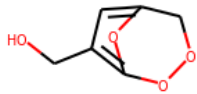

0.027658

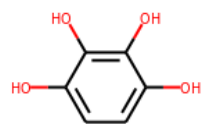

0.029326

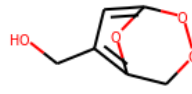

0.029526

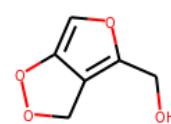

0.031459

|                                  |        |                                           |        |
|----------------------------------|--------|-------------------------------------------|--------|
| Top predicted substructures      | prob   |                                           |        |
| [#6X3][#6X3]                     | 0.9984 | [OX2H1][CX4H2][#6X3H0]                    | 0.9807 |
| [OX2H1]                          | 0.9967 | [#6X3H1][#6X3H0]                          | 0.98   |
| [#6X3][#6X3][#6X3][#6X3]         | 0.9962 | [CX4H2]( [#6] ) [O]                       | 0.9639 |
| [#6H1]                           | 0.9955 | [cH]                                      | 0.9406 |
| [#8][#6][#6][#6X3]               | 0.9813 | [CX4H2]([OX2H1])[cX3H0]                   | 0.9278 |
| best positives                   | prob   | best negatives                            | prob   |
| [#6X3][#6X3]                     | 0.9984 | [CX4H0]([NX3H1])([CX4H3])([CX4H2])[CX4H1] | 0.0    |
| [OX2H1]                          | 0.9967 | [CX4H1]([NX3H0])([CX4H2])[CX4H0]          | 0.0    |
| [#6X3][#6X3][#6X3][#6X3]         | 0.9962 | [CX4H1]([NX3H1])([CX4H3])[CX4H2]          | 0.0    |
| [#6H1]                           | 0.9955 | [CX4H1]([NX3H2])([CX4H2])[CX3H1]          | 0.0    |
| [#8][#6][#6][#6X3]               | 0.9813 | [CX4H0]([NX3H1])([CX4H2])([CX4H2])[CX4H1] | 0.0    |
| [OX2H1][CX4H2][#6X3H0]           | 0.9807 | [CX4H2]([NX3H1])[CX4H3]                   | 0.0    |
| [#6X3H1][#6X3H0]                 | 0.98   | [OX1H0]=[CX3H0]1[CX4H1][CX4H1][CX4H2]1    | 0.0    |
| [CX4H2]( [#6] ) [O]              | 0.9639 | [#8][#6H1][#6H2][#6H1]=[#8]               | 0.0    |
| [cH]                             | 0.9406 | [CX4H1]([NX3H0])([CX4H2])[CX3H1]          | 0.0    |
| [CX4H2]([OX2H1])[cX3H0]          | 0.9278 | [CX4H1]([NX3H2])([CX4H2])[CX4H0]          | 0.0    |
| worst negatives                  | prob   | worst positives                           | prob   |
| [OX2H][cX3]:[c]                  | 0.7758 | [#8][#6][#6]=[#8]                         | 0.0076 |
| [#8][#6][#6][#6][#6][#8]         | 0.6978 | [CX3](=O)[OX2H1]                          | 0.0288 |
| [cH]cO                           | 0.6963 | O=[#6][#6][#6X3]                          | 0.0477 |
| [cX3H0]([cX3H1])([cX3H0])[OX2H1] | 0.4846 | [CX3](=[OX1])O                            | 0.2277 |
| [cX3H0]([cX3H1])([cX3H0])[CX4H2] | 0.4254 | [cX3H0][cX3H1][cX3H1][cX3H0]              | 0.3364 |
| o[cH]                            | 0.3731 | [#8][#6][#6H2]                            | 0.3535 |
| [#8][#6H1][#6H1]                 | 0.3526 | [#8]=[#6][#8]                             | 0.4866 |
| [cX3H1]([OX2H0])[cX3H1]          | 0.3159 | [#8][#6][#6H2][#8]                        | 0.6704 |
| [#8][#6][#6]=[#6X3]              | 0.233  | [#6H1][#6H1]                              | 0.6911 |
| [#8][#6][#6]=[#6][#6][#8]        | 0.2187 | [#8][#6H0][#6H1]                          | 0.8119 |

---

Example 17 true smiles: NC(CC(=O)O)C(=O)O formula: C4H7NO4  
Index of correct structure: 0 of 13760  
True structure loss: 0.037025  
True structure:

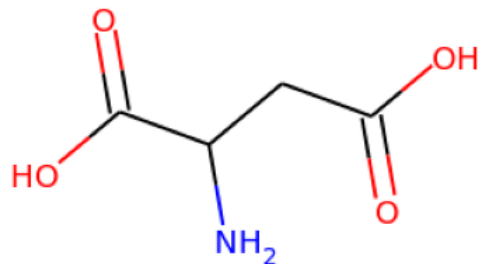

Experimental <sup>13</sup>C NMR (solvent: D2O)

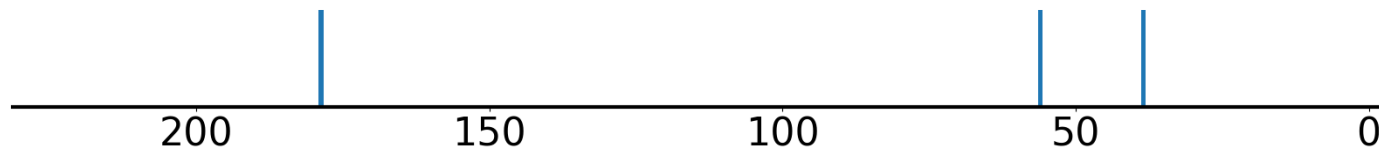

Experimental <sup>1</sup>H NMR (solvent: D2O)

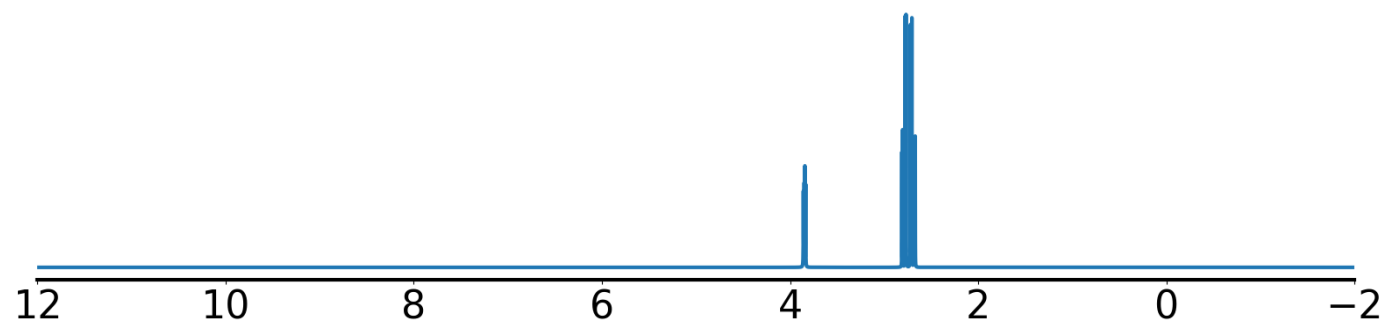

Top predicted structures (loss):

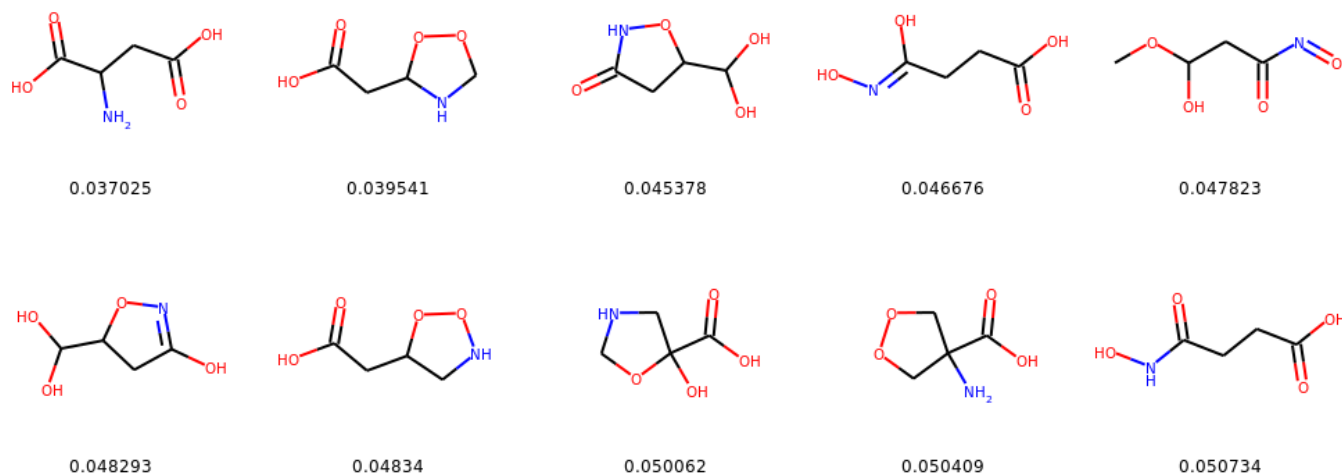

|                             |        |                                    |        |
|-----------------------------|--------|------------------------------------|--------|
| Top predicted substructures | prob   |                                    |        |
| [CX3](=[OX1])C              | 0.9946 | [CX3](=O)[OX2H1]                   | 0.8149 |
| [OX2H1]                     | 0.9837 | [#6H1]                             | 0.7734 |
| [#8]=[#6][#8]               | 0.9751 | [CX4H2][CX3]=O                     | 0.7038 |
| [CX3](=[OX1])O              | 0.9299 | [#6H1][#6H1]                       | 0.6788 |
| OCC[CH2]                    | 0.8344 | [#8][#6][#6][#6X3]                 | 0.674  |
| best positives              | prob   | best negatives                     | prob   |
| [CX3](=[OX1])C              | 0.9946 | [CX2H1]#[CX2H0][CX3H1]=[CX3H0]     | 0.0    |
| [OX2H1]                     | 0.9837 | CC#CCC=C                           | 0.0    |
| [#8]=[#6][#8]               | 0.9751 | [CX3H0](=[CX3H2])([CX4H3])[CX4H2]  | 0.0    |
| [CX3](=[OX1])O              | 0.9299 | CC=CC#CC                           | 0.0    |
| OCC[CH2]                    | 0.8344 | [#6H3][#6X3][#6X3]=[#6X3H2]        | 0.0    |
| [CX3](=O)[OX2H1]            | 0.8149 | CCC=CC#C                           | 0.0    |
| [#6H1]                      | 0.7734 | [#6X3H1]=[#6X3H1][#6X3H0]=[#6X3H1] | 0.0    |
| [CX4H2][CX3]=O              | 0.7038 | C=CCC#C                            | 0.0    |
| [#8][#6][#6H2]              | 0.6337 | CC=CCC#C                           | 0.0    |
| O=[CX3][CX4H]               | 0.6021 | [CX3H1](=[CX3H1])[CX2H0]           | 0.0    |
| worst negatives             | prob   | worst positives                    | prob   |
| [#6H1][#6H1]                | 0.6788 | [CX4H1]([NX3H2])([CX4H2])[CX3H0]   | 0.0278 |
| [#8][#6][#6][#6X3]          | 0.674  | [#8]=[#6][#6][#6][#6]=[#8]         | 0.1507 |
| [CX4H]O                     | 0.5629 | [#7H2][#6X4H1][#6X3]               | 0.2111 |
| O[CX4H][CX4H2]              | 0.504  | [OX1H0]=[CX3H0]([#8])[CX4H2]       | 0.2677 |
| [#7X3H1]                    | 0.5023 | [#8]=[#6][#6H2][#6H1]              | 0.3254 |
| [#8][#6H1][#6H1]            | 0.3657 | [#8][#6H0][#6H1]                   | 0.3468 |
| [CX4H](O)CO                 | 0.3344 | [#8][#6][#6][#6][#6][#8]           | 0.3527 |
| [#8]=[#6][#6H1][#6H1]       | 0.2981 | [#7][#6][#6][#6X3]                 | 0.4039 |
| [#6H2][#6H1r3]              | 0.2649 | O=[CX3H0][CX4H2][CX4H1]            | 0.4315 |
| [CX4H2]([#6])[O]            | 0.2554 | [CX4H2]([CX4H1])[CX3H0]            | 0.4445 |

---

Example 18 true smiles: CC(C)(C)OC(=O)NO formula: C5H11NO3  
Index of correct structure: 1 of 13267  
True structure loss: 0.010181  
True structure:

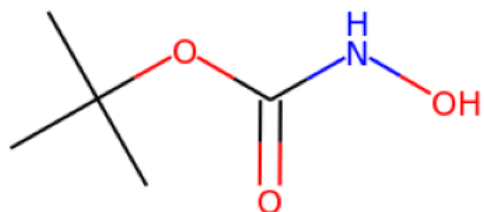

Experimental <sup>13</sup>C NMR (solvent: CDCl<sub>3</sub>)

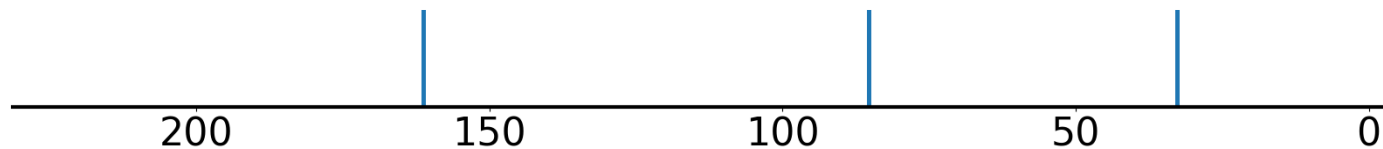

Experimental <sup>1</sup>H NMR (solvent: D<sub>2</sub>O)

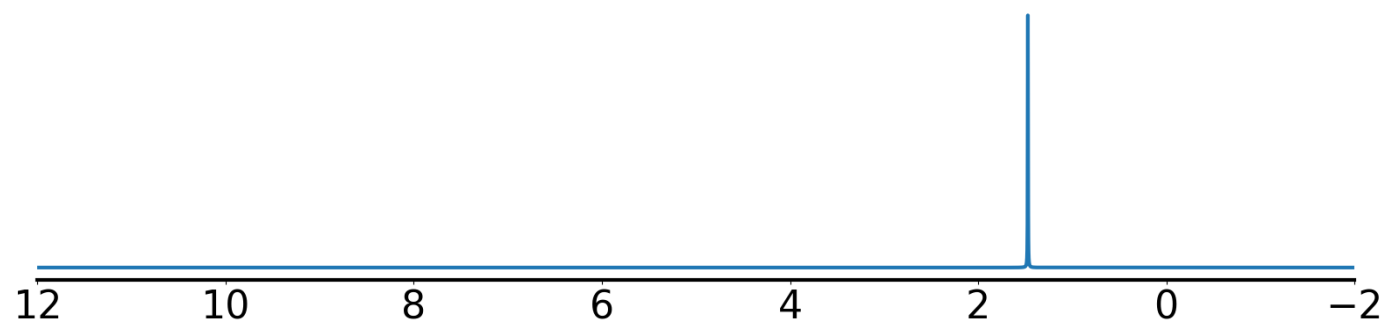

Top predicted structures (loss):

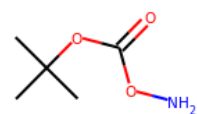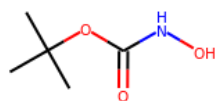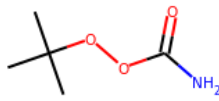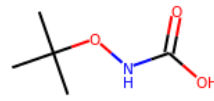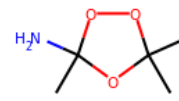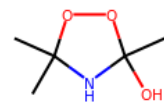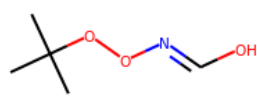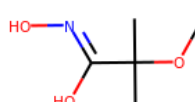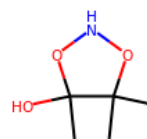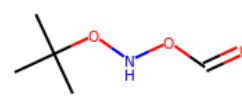

|                                |        |                                       |        |
|--------------------------------|--------|---------------------------------------|--------|
| Top predicted substructures    | prob   |                                       |        |
| [CX4H3]                        | 0.9976 | [#6H3][#6H0]                          | 0.9892 |
| [#6H3][#6][#6]                 | 0.9966 | [CX4H3][#6]                           | 0.9447 |
| [CX4H3][CX4]O                  | 0.9959 | [#6H0]([#6H3])([#6H3])[#8]            | 0.9207 |
| [CX4H3][CX4H0][CX4H3]          | 0.9957 | [CX4H3][CX4H0]([CX4H3])[OX2H0]        | 0.9195 |
| [CX4H3][CX4H0]                 | 0.9949 | [OX2H1]                               | 0.8938 |
| best positives                 | prob   | best negatives                        | prob   |
| [CX4H3]                        | 0.9976 | CCC#CC#C                              | 0.0    |
| [#6H3][#6][#6]                 | 0.9966 | [CX3H1](=[CX3H2])[CX2H0]              | 0.0    |
| [CX4H3][CX4]O                  | 0.9959 | C=CC=CC#C                             | 0.0    |
| [CX4H3][CX4H0][CX4H3]          | 0.9957 | [CX2H1]#[CX2H0][CX3H1]=[CX3H0]        | 0.0    |
| [CX4H3][CX4H0]                 | 0.9949 | CC=CC#CC                              | 0.0    |
| [#6H3][#6H0]                   | 0.9892 | [CX4H1]([CX4H2])([CX4H2])[CX2H0]      | 0.0    |
| [CX4H3][#6]                    | 0.9447 | CC=CCC#C                              | 0.0    |
| [#6H0]([#6H3])([#6H3])[#8]     | 0.9207 | [CX2H0]([#CX2H1])[CX2H0]              | 0.0    |
| [CX4H3][CX4H0]([CX4H3])[OX2H0] | 0.9195 | [#6X2][#6H1][#6X2]                    | 0.0    |
| [OX2H1]                        | 0.8938 | [OX2H0]1[CX4H2][CX4H2][CX4H1][CX4H1]1 | 0.0    |
| worst negatives                | prob   | worst positives                       | prob   |
| [#6X4H3][#6][#8H]              | 0.4604 | [#7X3H1]                              | 0.0367 |
| [#8][#6][#6][#8]               | 0.4109 | [CX4]([CX4H3])([CX4H3])[CX4H3]        | 0.552  |
| [#7X3H2]                       | 0.3457 | [CX3]([OX1])O                         | 0.6945 |
| [#8][#6H0][#6H1]               | 0.2901 | [#8]=[#6][#8]                         | 0.7656 |
| [OX2H1][CX4H0][CX4H3]          | 0.2894 | [CH3][#6][#8]                         | 0.8774 |
| [#7H2][#6H0]                   | 0.2393 | [OX2H1]                               | 0.8938 |
| [#8][#6][#6H2]                 | 0.2199 | [CX4H3][CX4H0]([CX4H3])[OX2H0]        | 0.9195 |
| [CX3](=O)[OX2H1]               | 0.161  | [#6H0]([#6H3])([#6H3])[#8]            | 0.9207 |
| [#6H1]                         | 0.1518 | [CX4H3][#6]                           | 0.9447 |
| [#6H3][#6][#6X3]               | 0.15   | [#6H3][#6H0]                          | 0.9892 |

---

Example 19 true smiles: CN(C)c1ccccc1 formula: C8H11N  
Index of correct structure: 0 of 10820  
True structure loss: 0.018022  
True structure:

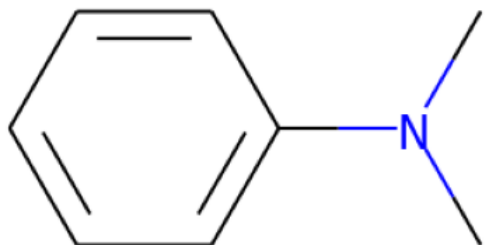

Experimental <sup>13</sup>C NMR (solvent: CDCl<sub>3</sub>)

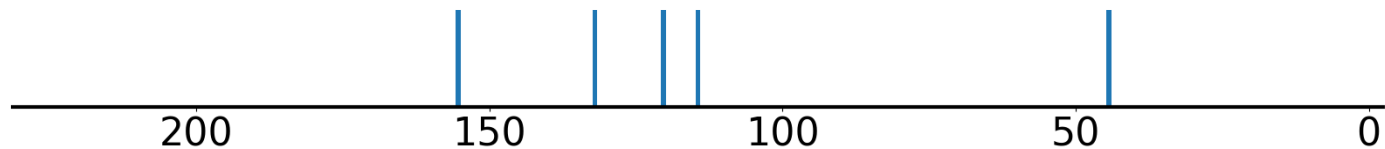

Experimental <sup>1</sup>H NMR (solvent: D<sub>2</sub>O)

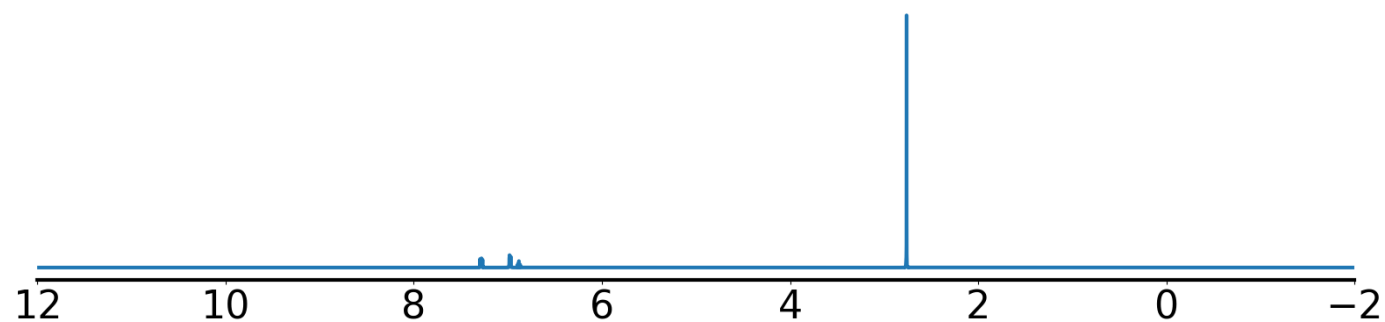

Top predicted structures (loss):

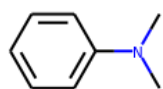

0.018022

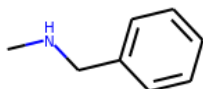

0.024033

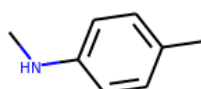

0.044352

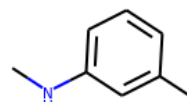

0.045717

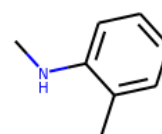

0.048424

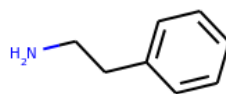

0.051874

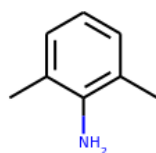

0.052251

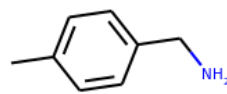

0.052462

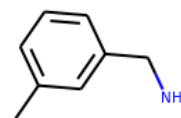

0.053827

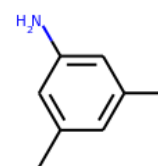

0.055472



|                              |        |                                           |        |
|------------------------------|--------|-------------------------------------------|--------|
| Top predicted substructures  | prob   |                                           |        |
| [#6H1]                       | 0.9908 | [#6H3][#7]                                | 0.9085 |
| [#6X3][#6X3]                 | 0.9895 | [#7][#6][#6][#6X3]                        | 0.9024 |
| [#6X3][#6X3][#6X3][#6X3]     | 0.9707 | [cH]                                      | 0.8996 |
| [#7X3][#6H3]                 | 0.9186 | [cH][cH]                                  | 0.8718 |
| [#6X3H1][#6X3H0]             | 0.9179 | [CX4H3]                                   | 0.861  |
| best positives               | prob   | best negatives                            | prob   |
| [#6H1]                       | 0.9908 | [OX2H0]1[CX4H2][CX4H2][CX4H1][CX4H1]1     | 0.0    |
| [#6X3][#6X3]                 | 0.9895 | [OX2H0]1[CX4H2][CX4H1][CX4H1]1            | 0.0    |
| [#6X3][#6X3][#6X3][#6X3]     | 0.9707 | [OX2H0][CX4H2][CX4H2][CX4H1][OX2H0]       | 0.0    |
| [#7X3][#6H3]                 | 0.9186 | [OX2H1][CX4H1]1[CX4H1][CX4H2][CX4H1]1     | 0.0    |
| [#6X3H1][#6X3H0]             | 0.9179 | [#6]1[#8][#6][#6]1=[#8]                   | 0.0    |
| [#6H3][#7]                   | 0.9085 | [OX2H0][CX4H2][CX4H0][OX2H0]              | 0.0    |
| [#7][#6][#6][#6X3]           | 0.9024 | [OX2H1][CX4H2][CX4H1]([OX2H0])[CX4H1]     | 0.0    |
| [cH]                         | 0.8996 | [CX4H0]([OX2H1])([CX4H3])([CX4H2])[CX4H1] | 0.0    |
| [cH][cH]                     | 0.8718 | [CX4H1]([OX2H0])([CX4H3])[CX4H0]          | 0.0    |
| [CX4H3]                      | 0.861  | [CX4H0]([OX2H0])([CX4H3])([CX4H2])[CX4H1] | 0.0    |
| worst negatives              | prob   | worst positives                           | prob   |
| [#6X3][#6H2][#6X3]           | 0.4836 | [#7X3H0]                                  | 0.1399 |
| [#7X3H1]                     | 0.3138 | [CX4H3][NX3H0]                            | 0.203  |
| [cX3H0][cX3H1][cX3H1][cX3H0] | 0.3119 | [#7][#6X3H0][#6X3H1]                      | 0.2503 |
| [#7X3][#6H2]                 | 0.3078 | [#7][#6H0][#6H1]                          | 0.3137 |
| [#6X3][#7][#6X3]             | 0.2768 | [#6X3H1][#6X3H1][#6X3H0][#6X3H1]          | 0.4022 |
| [#7X3H2]                     | 0.2569 | [#6H3][#7][#6X3]                          | 0.6086 |
| [#7H2][#6H2]                 | 0.2227 | [#6H1][#6H1]                              | 0.6087 |
| [CX4H2][CX3]=C               | 0.1977 | [#6]1[#6][#6][#6][#6][#6]1                | 0.6263 |
| [#6]1[#6][#6][#6][#7]1       | 0.1961 | [cX3H1]([cX3H1])[cX3H1]                   | 0.6802 |
| [#6X3][#7X3][#6X3]           | 0.1922 | [#7][#6][#6X3]                            | 0.7452 |

---

Example 20 true smiles: CCCC(CCC)C(=O)O formula: C<sub>8</sub>H<sub>16</sub>O<sub>2</sub>  
 Index of correct structure: 0 of 9984  
 True structure loss: 0.017342  
 True structure:

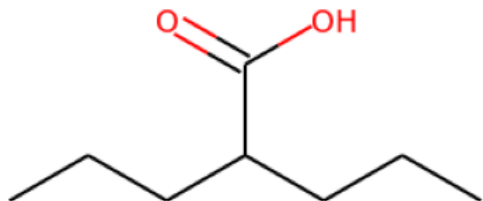

Experimental <sup>13</sup>C NMR (solvent: CDCl<sub>3</sub>)

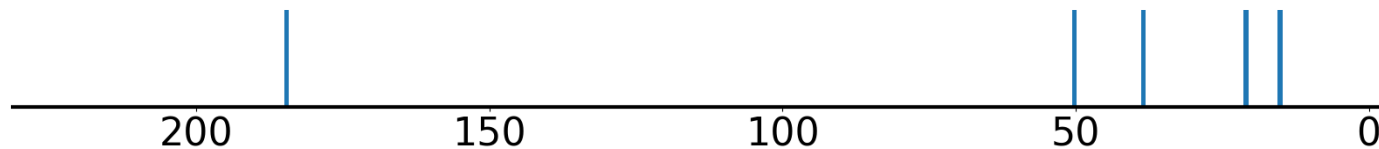

Experimental <sup>1</sup>H NMR (solvent: D<sub>2</sub>O)

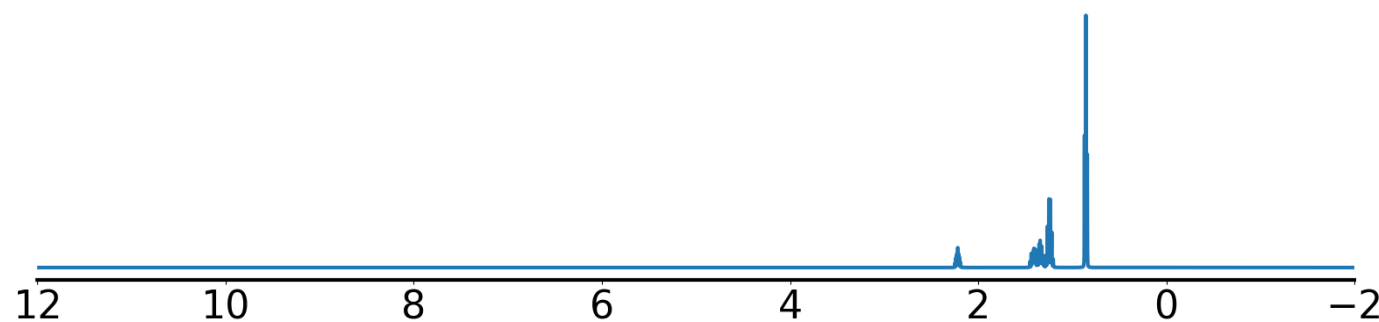

Top predicted structures (loss):

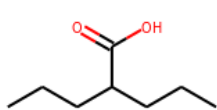

0.017342

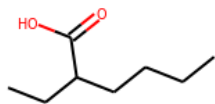

0.022903

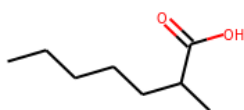

0.026993

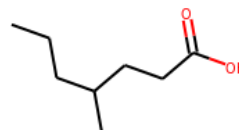

0.031791

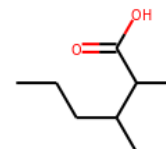

0.032951

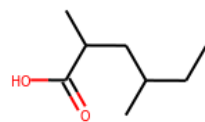

0.0331

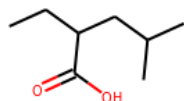

0.035662

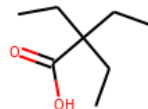

0.037335

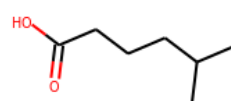

0.041204

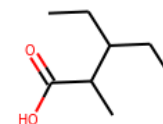

0.042131

| Top predicted substructures            | prob        |                                           |             |
|----------------------------------------|-------------|-------------------------------------------|-------------|
| [CX4H3]                                | 1.0         | [CX4H3][CX4H2]                            | 0.9967      |
| [#6H3][#6][#6]                         | 1.0         | [CX3](=O)[OX2H1]                          | 0.9935      |
| [CX4H3][#6]                            | 0.9999      | [CX3](=[OX1])O                            | 0.9871      |
| [CX4H2]([#6])[#6]                      | 0.9993      | [#8]=[#6][#8]                             | 0.9806      |
| [CX3](=[OX1])C                         | 0.9992      | [OX2H1]                                   | 0.9799      |
| <b>best positives</b>                  | <b>prob</b> | <b>best negatives</b>                     | <b>prob</b> |
| [CX4H3]                                | 1.0         | C=CC=CC#C                                 | 0.0         |
| [#6H3][#6][#6]                         | 1.0         | [CX2H0](#[CX2H1])[CX3H0]                  | 0.0         |
| [CX4H3][#6]                            | 0.9999      | CC=CC#CC                                  | 0.0         |
| [CX4H2]([#6])[#6]                      | 0.9993      | [CX2H1]#[CX2H0][CX3H1]=[CX3H0]            | 0.0         |
| [CX3](=[OX1])C                         | 0.9992      | [CX2H0](#[CX2H1])[CX4H2]                  | 0.0         |
| [CX4H3][CX4H2]                         | 0.9967      | [CX2H0](#[CX2H1])[CX4H0]                  | 0.0         |
| [CX3](=O)[OX2H1]                       | 0.9935      | CC#CCC#C                                  | 0.0         |
| [CX3](=[OX1])O                         | 0.9871      | [CX3H0](=[CX3H1])([OX2H0])[CX2H0]         | 0.0         |
| [#8]=[#6][#8]                          | 0.9806      | CCC=CC#C                                  | 0.0         |
| [OX2H1]                                | 0.9799      | [CX3H0](=[CX3H1])([CX4H2])[CX2H0]         | 0.0         |
| <b>worst negatives</b>                 | <b>prob</b> | <b>worst positives</b>                    | <b>prob</b> |
| [CHX4]( [CH3X4] ) [CH2X4]              | 0.7421      | [OX1H0]=[CX3H0][CX4H1]( [CX4H2] ) [CX4H2] | 0.0493      |
| [CX4H3][CX4H1]                         | 0.6922      | [CX4H1]( [CX4H2] ) ( [CX4H2] ) [CX3H0]    | 0.1727      |
| [#6X3][#6][#6][#6H3]                   | 0.6165      | [#6H1]( [#6H2] ) [#6H2]                   | 0.3844      |
| [CX3H0](=[OX1H0])([OX2H1])[CX4H2]      | 0.4988      | CCCCC                                     | 0.4191      |
| [#6H3][#6][#6X3]                       | 0.3757      | [CX4H2]( [CX4H2] ) [CX4H1]                | 0.6998      |
| [CX4H2][CX3]=O                         | 0.3629      | [CX4H2]CC=O                               | 0.7414      |
| [#6H3][#6][#6][#6H3]                   | 0.3247      | [#6H1]                                    | 0.7691      |
| [CX4H1]( [CX4H3] ) ( [CX4H2] ) [CX3H0] | 0.2418      | [CX3H0](=[OX1H0])([OX2H1])[CX4H1]         | 0.7779      |
| [#8][#6][#6H2]                         | 0.155       | [#6H1][#6H2]                              | 0.8012      |
| [#6H1][#6H1]                           | 0.1488      | [CX4H2][CX4H2]                            | 0.8027      |

---

Example 21 true smiles: Nc1ccnc(=O)[nH]1 formula: C4H5N3O  
Index of correct structure: 1 of 8616  
True structure loss: 0.025688  
True structure:

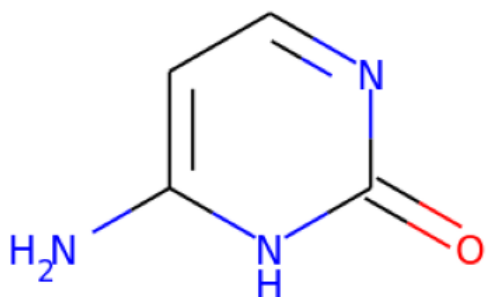

Experimental <sup>13</sup>C NMR (solvent: D2O)

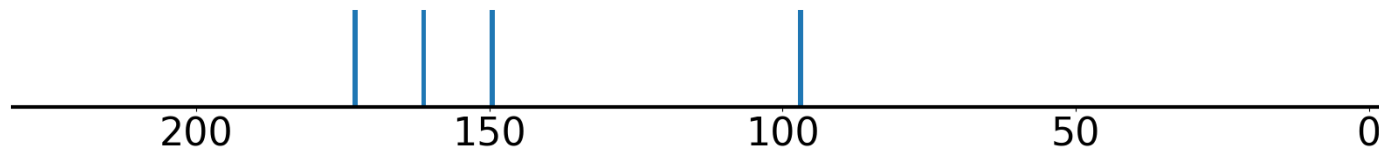

Experimental <sup>1</sup>H NMR (solvent: d2o)

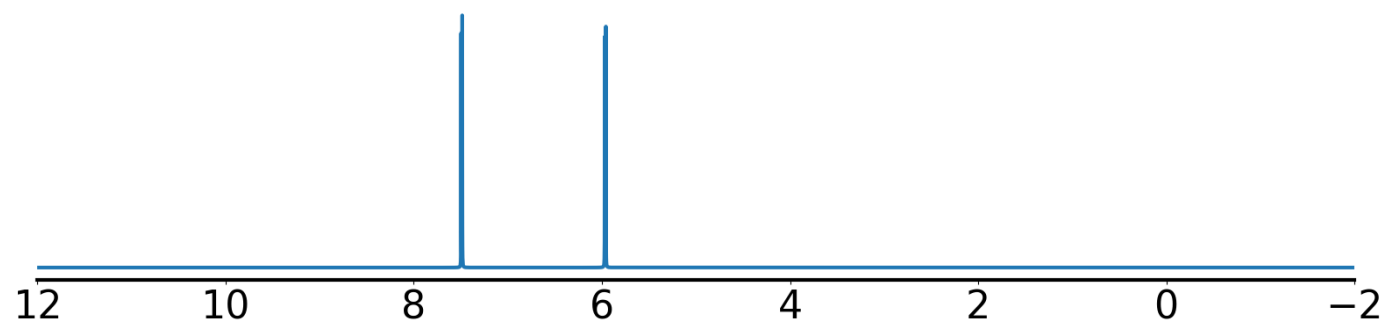

Top predicted structures (loss):

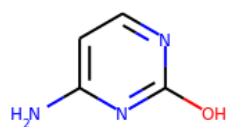

0.02392

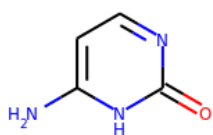

0.025688

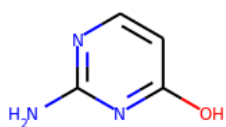

0.026505

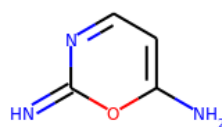

0.026884

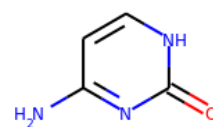

0.027135

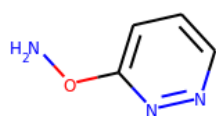

0.030327

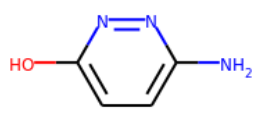

0.030571

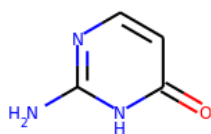

0.030602

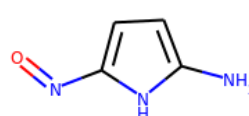

0.030929

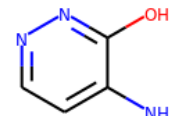

0.031199

|                             |        |                                              |        |
|-----------------------------|--------|----------------------------------------------|--------|
| Top predicted substructures | prob   |                                              |        |
| [#6H1]                      | 0.9905 | [cX3H1]([cX3H1])[cX3H0]                      | 0.8583 |
| [#6X3][#6X3]                | 0.9878 | [cH][cH]                                     | 0.826  |
| [#6X3H1][#6X3H0]            | 0.9355 | [#7][#6H0][#6H1]                             | 0.7848 |
| [#7][#6][#6X3]              | 0.9096 | [#7][#6][#6][#6X3]                           | 0.7703 |
| [#7X3H2]                    | 0.8746 | [cH]                                         | 0.7557 |
| best positives              | prob   | best negatives                               | prob   |
| [#6H1]                      | 0.9905 | [OX2H1][CX4H2][CX4H1]([CX4H2])[CX4H2]        | 0.0    |
| [#6X3][#6X3]                | 0.9878 | [CX4H0]([CX4H3])([CX4H2])([CX4H2])[CX4H1]    | 0.0    |
| [#6X3H1][#6X3H0]            | 0.9355 | [OX2H0][CX4H2][CX4H1]([CX4H1])[CX4H1]        | 0.0    |
| [#7][#6][#6X3]              | 0.9096 | [CX4H1]([CX4H2])([CX4H1])[CX2H0]             | 0.0    |
| [#7X3H2]                    | 0.8746 | [CX4H1]([CX4H3])([CX4H2])[CX4H0]             | 0.0    |
| [cX3H1]([cX3H1])[cX3H0]     | 0.8583 | [OX2H0]1[CX4H2][CX4H1]1[CX4H2]               | 0.0    |
| [cH][cH]                    | 0.826  | [OX1H0]=[CX3H0]1[CX4H1][CX4H1][CX4H2]1       | 0.0    |
| [#7][#6H0][#6H1]            | 0.7848 | [CX4H1]([OX2H0])([CX4H2])[CX2H0]             | 0.0    |
| [#7][#6][#6][#6X3]          | 0.7703 | [OX2H0][CX4H1][CX4H1]([CX4H2][CX4H1])[CX4H1] | 0.0    |
| [cH]                        | 0.7557 | [OX2H0][CX4H2][CX4H1]([CX4H1])[CX4H3]        | 0.0    |
| worst negatives             | prob   | worst positives                              | prob   |
| [#6X3][#6X3][#6X3][#6X3]    | 0.5565 | [cX3H1]([nX2H0])[cX3H1]                      | 0.0774 |
| [#8][#6H0][#6H1]            | 0.5207 | O=[cX3]                                      | 0.1702 |
| [#6]=[#7H]                  | 0.4368 | [#6X3][#7X3][#6X3]                           | 0.2537 |
| [#7][#6H0]=[#7]             | 0.3856 | [#7X3H1]                                     | 0.4398 |
| [NH1]=[#6][#7]              | 0.383  | [#6X3][#7][#6X3]                             | 0.4768 |
| O=[#6][#6][#6X3]            | 0.3528 | [#7][#6][#6][#6][#7]                         | 0.504  |
| [#8][#6][#6][#6X3]          | 0.3478 | [#7][#6H0][#7]                               | 0.5465 |
| [OX1H0]=[cX3H0][cX3H1]      | 0.3236 | [#7][#6][#7]                                 | 0.6236 |
| [CX3H1]([cX3H1])[cX3H0]     | 0.3167 | [#7H2][#6H0]                                 | 0.6323 |
| [CHX3](=C)C                 | 0.3142 | [#6H1][#6H1]                                 | 0.6424 |

---

Example 22 true smiles: CC(O)(CC(=O)O)C(=O)O formula: C5H8O5  
 Index of correct structure: 1 of 8115  
 True structure loss: 0.022315  
 True structure:

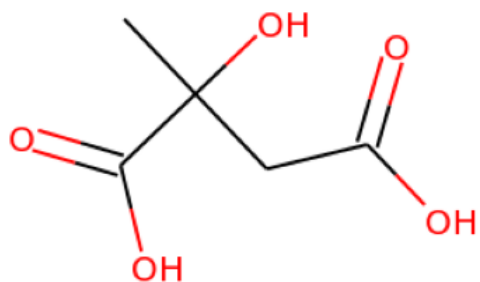

Experimental <sup>13</sup>C NMR (solvent: DMSO)

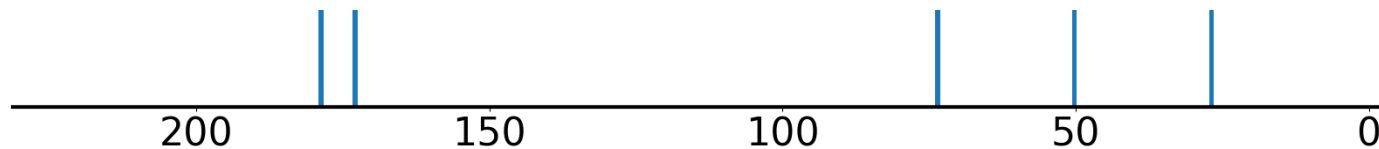

Experimental <sup>1</sup>H NMR (solvent: D2O)

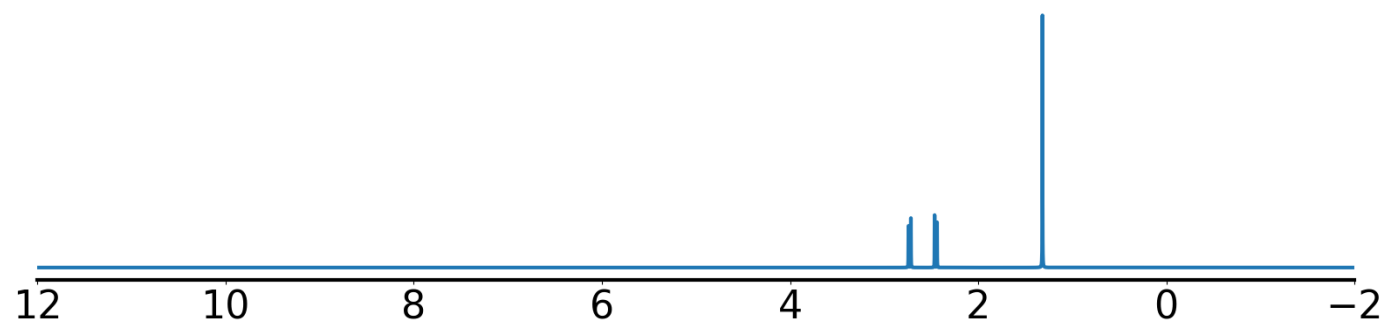

Top predicted structures (loss):

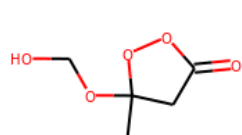

0.020519

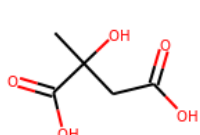

0.022315

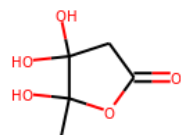

0.024159

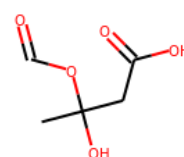

0.029605

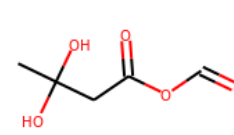

0.032483

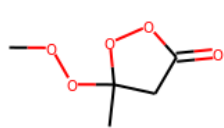

0.032936

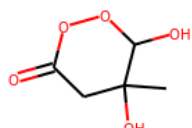

0.035614

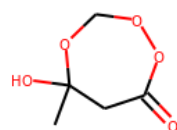

0.039742

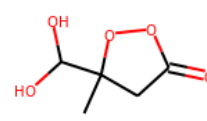

0.040299

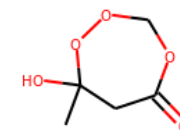

0.056143

|                                  |        |                                    |        |
|----------------------------------|--------|------------------------------------|--------|
| Top predicted substructures      | prob   |                                    |        |
| [#8]=[#6][#8]                    | 1.0    | [CX4H2]([#6])[#6]                  | 0.9995 |
| [CX3](=[OX1])O                   | 1.0    | [#8X1]=[#6X3][#6H2][#6H0]          | 0.9991 |
| [#6H3][#6][#6]                   | 0.9999 | [#8][#6][#6H2]                     | 0.9981 |
| [CX4H3]                          | 0.9999 | [#6H3][#6H0]                       | 0.9944 |
| [CX3](=[OX1])C                   | 0.9998 | [OX2H1]                            | 0.9929 |
| best positives                   | prob   | best negatives                     | prob   |
| [#8]=[#6][#8]                    | 1.0    | [#6X2][#6H1][#6X2]                 | 0.0    |
| [CX3](=[OX1])O                   | 1.0    | CC#CCC#C                           | 0.0    |
| [#6H3][#6][#6]                   | 0.9999 | [CX2H1][#CX2H0][CX3H1]=[CX3H0]     | 0.0    |
| [CX4H3]                          | 0.9999 | [CX4H1]([CX4H1])([CX4H1])[CX2H0]   | 0.0    |
| [CX3](=[OX1])C                   | 0.9998 | CC#CCC=C                           | 0.0    |
| [CX4H2]([#6])[#6]                | 0.9995 | CCC#CC#C                           | 0.0    |
| [#8X1]=[#6X3][#6H2][#6H0]        | 0.9991 | [CX3H0]([CX3H1])([CX4H1])[CX2H0]   | 0.0    |
| [#8][#6][#6H2]                   | 0.9981 | [#7][#6][#6][#7]                   | 0.0    |
| [#6H3][#6H0]                     | 0.9944 | [#6X3H1]=[#6X3H1][#6X3H0]=[#6X3H1] | 0.0    |
| [OX2H1]                          | 0.9929 | C=CC=CC=C                          | 0.0    |
| worst negatives                  | prob   | worst positives                    | prob   |
| [OX2H0][CX3H0][CX4H2]            | 0.7164 | [#8][#6][#6][#8]                   | 0.147  |
| [#6H3][#6H0]([#6H2])[#6H2]       | 0.4355 | [#6H3][#6][#6X3]                   | 0.1573 |
| [CX4H2]([CX4H1])[CX3H0]          | 0.3879 | [#8][#6][#6]=[#8]                  | 0.1857 |
| [CX3H0]([OX1H0])([OX2H0])[CX4H2] | 0.3158 | [#8][#6][#6][#6][#6][#8]           | 0.2144 |
| [#6H1]                           | 0.2752 | [OX1H0]=[CX3H0][CX4H0][CX4H3]      | 0.2147 |
| [CX3H0]([OX1H0])([OX2H1])[CX4H1] | 0.2566 | [#8]=[#6][#6][#6][#6]=[#8]         | 0.2256 |
| [#8][#6H0][#6H1]                 | 0.2381 | [OX2H1][CX4H0][CX4H2][CX3H0]       | 0.3545 |
| [CX4H2]([#6])[O]                 | 0.1961 | [CX4H2]CC=O                        | 0.3627 |
| [CX3H0]([OX1H0])([OX2H0])[CX4H0] | 0.1881 | [CH3]CC[OH]                        | 0.5273 |
| [OX2H0][CX4H2][#6H0]             | 0.1277 | [#8][#6][#6][#6][#6]=[#8]          | 0.5354 |

---

Example 23 true smiles: COC(=O)C=C(C)N formula: C5H9NO2  
 Index of correct structure: 32 of 6935  
 True structure loss: 0.068837  
 True structure:

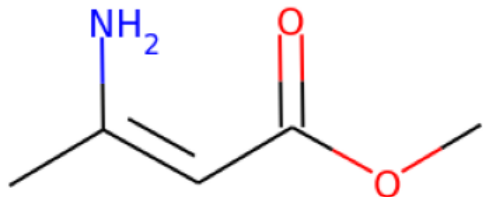

Experimental <sup>13</sup>C NMR (solvent: CDCl<sub>3</sub>)

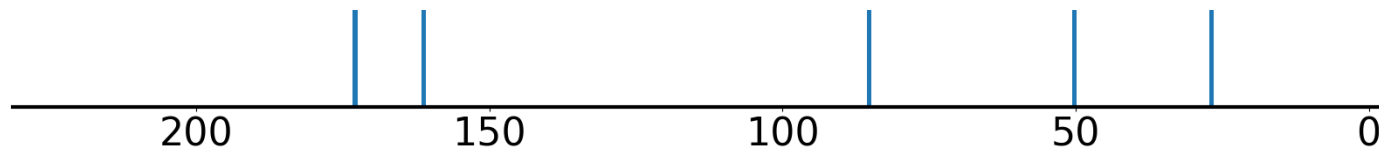

Experimental <sup>1</sup>H NMR (solvent: CDCl<sub>3</sub>)

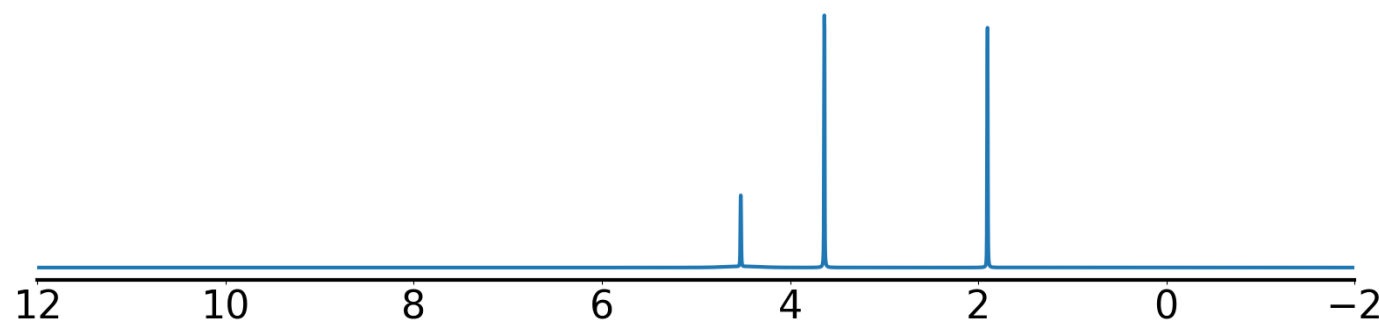

Top predicted structures (loss):

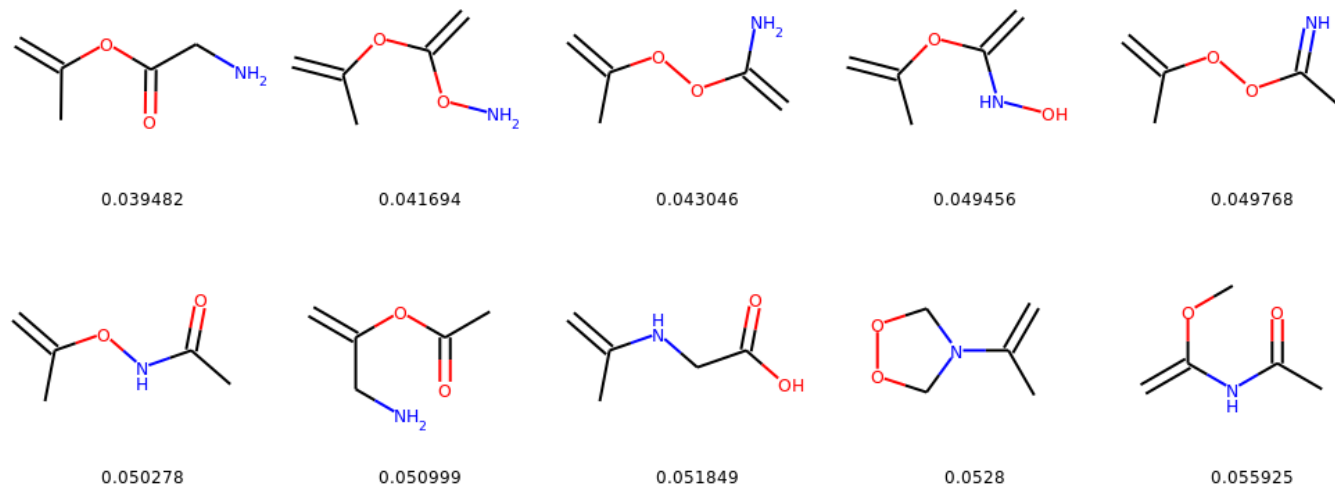



|                             |        |                                   |        |
|-----------------------------|--------|-----------------------------------|--------|
| Top predicted substructures | prob   |                                   |        |
| [CX4H3][CX3]                | 0.9979 | [CX3](=[OX1])C                    | 0.8923 |
| [CX4H3]                     | 0.9929 | [CH2X3](=C)                       | 0.8701 |
| [CX4H3][CX3H0]              | 0.9525 | [CX4H3][#6]                       | 0.8517 |
| [#6H3][#6H0]                | 0.9511 | [#7X3H2]                          | 0.8208 |
| [CX3H2]=[CX3H0]             | 0.9031 | [#8]=[#6][#8]                     | 0.8111 |
| best positives              | prob   | best negatives                    | prob   |
| [CX4H3][CX3]                | 0.9979 | CC#CC#C                           | 0.0    |
| [CX4H3]                     | 0.9929 | [CX2H0](#[CX2H0])[CX2H0]          | 0.0    |
| [CX4H3][CX3H0]              | 0.9525 | [CX2H0](#[CX2H1])[CX2H0]          | 0.0    |
| [#6H3][#6H0]                | 0.9511 | [CX4H1]([CX4H2])([CX4H1])[CX2H0]  | 0.0    |
| [CX3](=[OX1])C              | 0.8923 | [#6X2][#6H1][#6X2]                | 0.0    |
| [CX4H3][#6]                 | 0.8517 | [CX4H2]([CX4H0])[CX2H0]           | 0.0    |
| [#7X3H2]                    | 0.8208 | [CX4H1]([CX4H1])([CX4H1])[CX4H0]  | 0.0    |
| [#8]=[#6][#8]               | 0.8111 | [CX2H0](#[CX2H1])[CX3H0]          | 0.0    |
| [CX3](=[OX1])O              | 0.7836 | [CX3H1](=[CX3H2])[CX2H0]          | 0.0    |
| [#6H3][#6]=[#6X3]           | 0.7706 | [CX2H0](#[CX2H1])[CX4H0]          | 0.0    |
| worst negatives             | prob   | worst positives                   | prob   |
| [CX3H2]=[CX3H0]             | 0.9031 | [OX1H0]=[CX3H0][OX2H0][CX4H3]     | 0.01   |
| [CH2X3](=C)                 | 0.8701 | [#7][#6]=[#6X3]                   | 0.0213 |
| [#8][#6][#6H2]              | 0.8108 | [#7][#6X3H0]=[#6X3H1]             | 0.0458 |
| [CX4H3][CX3H0]=[CX3H2]      | 0.7892 | [CX3H0](=[OX1H0])([OX2H0])[CX3H1] | 0.0829 |
| [#7X3][#6H2]                | 0.7751 | [#6X3H1]=[#6X3H0]                 | 0.0851 |
| [#7][#6H2]                  | 0.7264 | [CX4H3][OX2H0]                    | 0.1684 |
| [#8][#6]=[#6H2]             | 0.6554 | [#6H1]                            | 0.1744 |
| [#7][#6][#6X3]              | 0.6018 | [#7][#6][#6H3]                    | 0.2123 |
| [#6X3H2]                    | 0.5889 | O=C[CX3H]                         | 0.2371 |
| [CX3H2]=CO                  | 0.5568 | [#8][#6][#6]=[#6X3]               | 0.253  |

---

Example 24 true smiles: c1ncc2[nH]cnc2n1 formula: C5H4N4  
Index of correct structure: 3 of 6256  
True structure loss: 0.019535  
True structure:

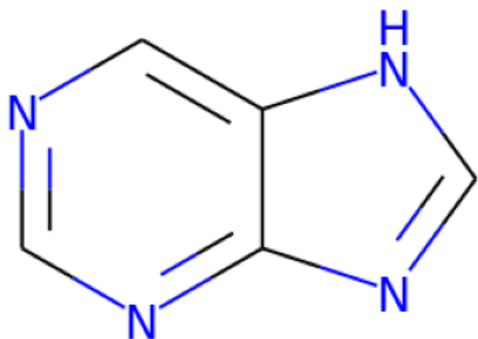

Experimental <sup>13</sup>C NMR (solvent: D2O)

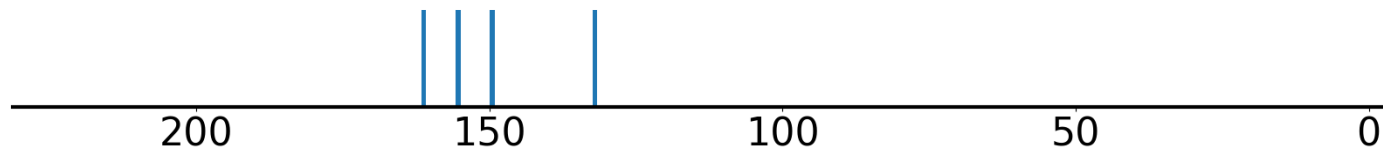

Experimental <sup>1</sup>H NMR (solvent: D2O)

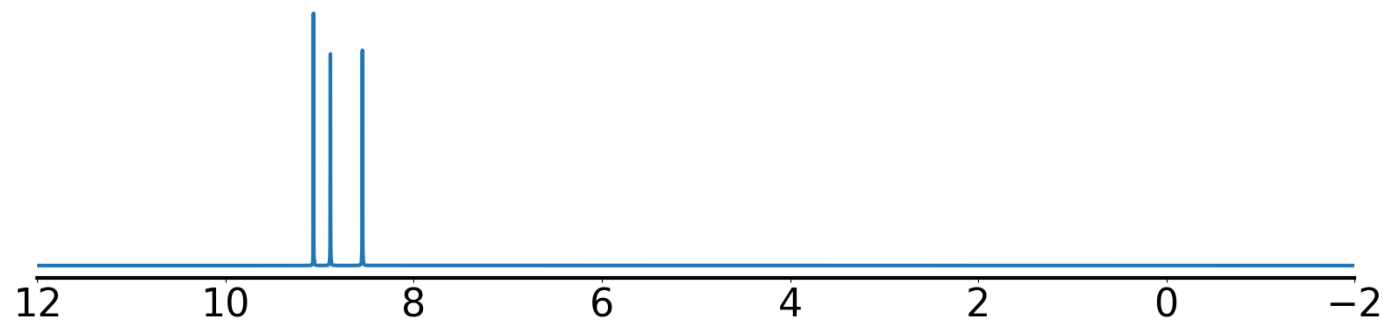

Top predicted structures (loss):

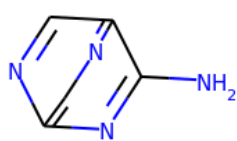

0.018063

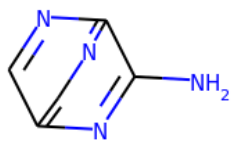

0.018063

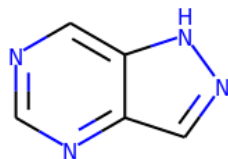

0.01853

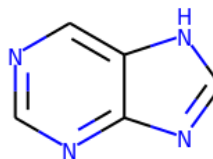

0.019535

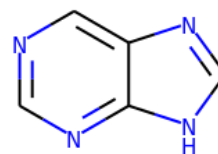

0.019535

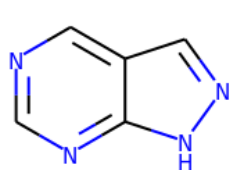

0.021099

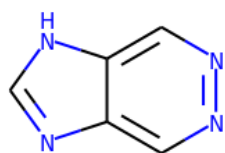

0.021188

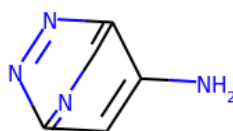

0.022142

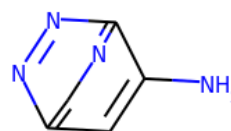

0.022142

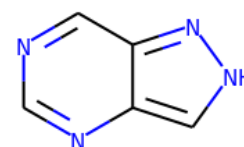

0.02358

| Top predicted substructures | prob        |                                           | prob        |
|-----------------------------|-------------|-------------------------------------------|-------------|
| [#6H1]                      | 0.9995      | [#7][#6][#6][#6X3]                        | 0.972       |
| [#7][#6][#6X3]              | 0.9979      | [cX3H1]([nX2H0])[cX3H0]                   | 0.9328      |
| [#6X3][#6X3]                | 0.9956      | [#7][#6][#7]                              | 0.9151      |
| [cH]                        | 0.9934      | [#6X3][#7][#6X3]                          | 0.9115      |
| [#6X3H1][#6X3H0]            | 0.9906      | [#7][#6][#6][#6][#7]                      | 0.8856      |
| <b>best positives</b>       | <b>prob</b> | <b>best negatives</b>                     | <b>prob</b> |
| [#6H1]                      | 0.9995      | {OX1H0}={CX3H0}1{CX4H1}{CX4H1}{CX4H2}1    | 0.0         |
| [#7][#6][#6X3]              | 0.9979      | [#8][#6H1][#6H2][#6H1]=[#8]               | 0.0         |
| [#6X3][#6X3]                | 0.9956      | {OX2H0}{CX4H2}{CX4H1}({CX4H1}){CX4H1}     | 0.0         |
| [cH]                        | 0.9934      | {OX2H0}{CX4H2}{CX4H2}{CX4H1}{OX2H0}       | 0.0         |
| [#6X3H1][#6X3H0]            | 0.9906      | {OX2H0}1{CX4H2}{CX4H2}{CX4H1}{CX4H1}1     | 0.0         |
| [#7][#6][#6][#6X3]          | 0.972       | {OX2H0}{CX4H2}{CX4H1}({CX4H1}){CX4H3}     | 0.0         |
| [cX3H1]([nX2H0])[cX3H0]     | 0.9328      | {CX4H0}({CX4H3})({CX4H2})({CX4H1}){CX4H1} | 0.0         |
| [#7][#6][#7]                | 0.9151      | {OX2H0}1{CX4H2}{CX4H1}1{CX4H1}            | 0.0         |
| [#6X3][#7][#6X3]            | 0.9115      | {CX4H0}({OX2H0})({CX4H3})({CX4H2}){CX4H1} | 0.0         |
| [#7][#6][#6][#6][#7]        | 0.8856      | {OX2H1}{CX4H1}{CX4H1}({CX4H1}){CX4H1}     | 0.0         |
| <b>worst negatives</b>      | <b>prob</b> | <b>worst positives</b>                    | <b>prob</b> |
| [#6X3][#6X3][#6X3][#6X3]    | 0.699       | [#6]1[#6][#7][#6][#7]1                    | 0.0387      |
| [cH][cH]                    | 0.5086      | [#7H][#6X3H1]                             | 0.1374      |
| [#7][#7]                    | 0.4519      | [#7X3H1]                                  | 0.2139      |
| [cX3H1]([nX2H0])[cX3H1]     | 0.3823      | [#6H1r5][#7]                              | 0.2143      |
| [#7][#6][#6][#6][#6][#7]    | 0.3706      | [#6X3][#7X3][#6X3]                        | 0.4718      |
| [#7X3H2]                    | 0.3652      | [#7][#6][#6][#7]                          | 0.5541      |
| [cX3H1]([cX3H1])[cX3H0]     | 0.3639      | [#7][#6H0][#7]                            | 0.5701      |
| [#7H2][#6H0]                | 0.3256      | [#7][#6H0][#6H1]                          | 0.7341      |
| [#8][#6H0][#6H1]            | 0.2648      | [#7][#6X3H0][#6X3H1]                      | 0.7677      |
| [#6H1][#6H1]                | 0.2312      | [#6H1][#7][#6H1]                          | 0.8053      |

---

Example 25 true smiles: CCC(C)C(=O)C(=O)O formula: C6H10O3  
Index of correct structure: 0 of 6069  
True structure loss: 0.021241  
True structure:

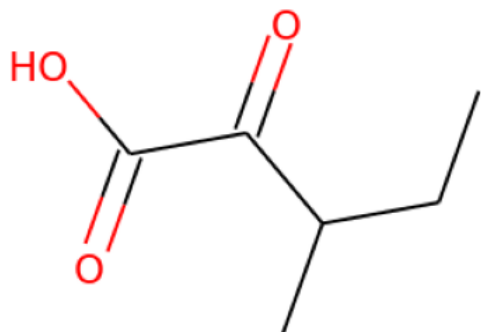

Experimental <sup>13</sup>C NMR (solvent: CDCl<sub>3</sub>)

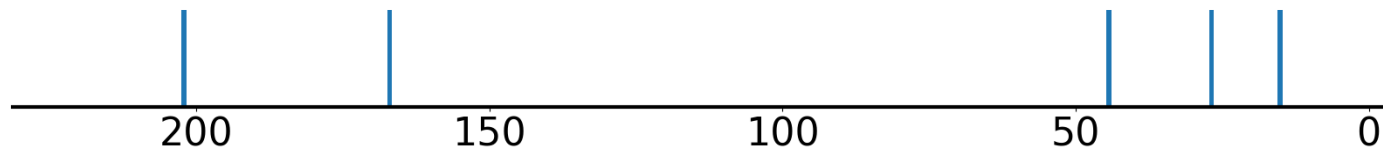

Experimental <sup>1</sup>H NMR (solvent: D<sub>2</sub>O)

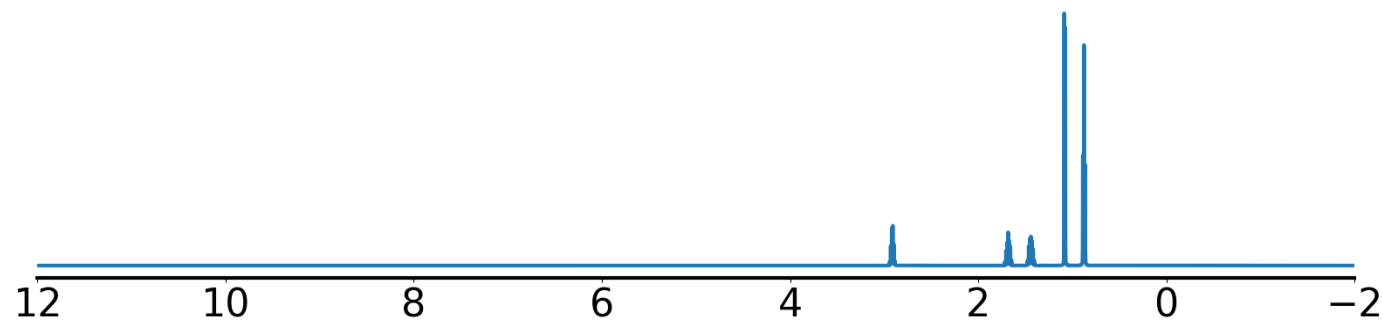

Top predicted structures (loss):

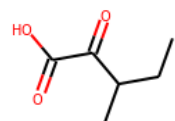

0.021241

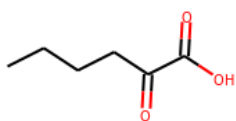

0.034124

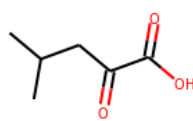

0.038773

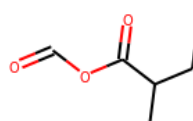

0.052157

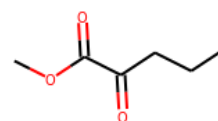

0.052959

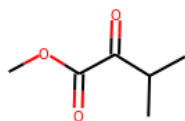

0.061265

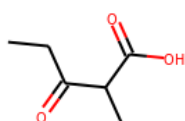

0.065131

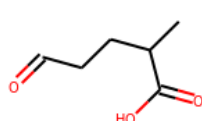

0.066794

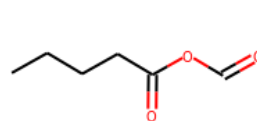

0.071492

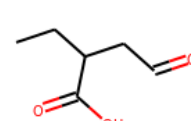

0.073254

|                                   |        |                                        |        |
|-----------------------------------|--------|----------------------------------------|--------|
| Top predicted substructures       | prob   |                                        |        |
| [CX3](=[OX1])C                    | 0.9999 | [CX3](=[OX1])O                         | 0.996  |
| [CX4H3]                           | 0.9993 | [#8]=[#6][#6]=[#8]                     | 0.9951 |
| [#6H3][#6][#6]                    | 0.9983 | [CX4H3][#6]                            | 0.9942 |
| [CX4H2]([#6])[#6]                 | 0.9974 | O=CC=O                                 | 0.9839 |
| [#8]=[#6][#8]                     | 0.9961 | [CX4H2]CC=O                            | 0.9391 |
| best positives                    | prob   | best negatives                         | prob   |
| [CX3](=[OX1])C                    | 0.9999 | [CX2H1]#[CX2H0][CX3H1]=[CX3H0]         | 0.0    |
| [CX4H3]                           | 0.9993 | [CX2H0](#[CX2H1])[CX4H2]               | 0.0    |
| [#6H3][#6][#6]                    | 0.9983 | CCC#CC#C                               | 0.0    |
| [CX4H2]([#6])[#6]                 | 0.9974 | CCC=CC#C                               | 0.0    |
| [#8]=[#6][#8]                     | 0.9961 | CC#CCC#C                               | 0.0    |
| [CX3](=[OX1])O                    | 0.996  | C=CCCC#C                               | 0.0    |
| [#8]=[#6][#6]=[#8]                | 0.9951 | C=CC=CC#C                              | 0.0    |
| [CX4H3][#6]                       | 0.9942 | [#6H2][#6]#[#6X2]                      | 0.0    |
| O=CC=O                            | 0.9839 | [CX2H0](#[CX2H1])[CX4H0]               | 0.0    |
| [CX4H2]CC=O                       | 0.9391 | [CX2H0](#[CX2H1])[CX3H1]               | 0.0    |
| worst negatives                   | prob   | worst positives                        | prob   |
| [CX4H2]([CX4H3])[CX4H2]           | 0.7067 | [#6H3][#6][#6][#6H3]                   | 0.0972 |
| [CX3H0](=[OX1H0])([CX4H2])[CX3H0] | 0.5411 | [CX4H1]([CX4H3])([CX4H2])[CX3H0]       | 0.1664 |
| [OX1H0]=[CX3H0]([#6])[CX4H2]      | 0.5047 | [OX1H0]=[CX3H0][CX4H1]([CX4H3])[CX4H2] | 0.1812 |
| [CX4H2][CX3]=O                    | 0.4796 | [#8][#6][#6]=[#8]                      | 0.3767 |
| [CX4H2][CX4H2]                    | 0.4556 | [CX4H3][CX4H1]                         | 0.4931 |
| [#8][#6][#6H2]                    | 0.3548 | [CX4H2]([CX4H3])[CX4H1]                | 0.5855 |
| [CX3H0](=[OX1H0])([OX2H1])[CX4H1] | 0.3269 | O=[CX3][CX4H]                          | 0.5926 |
| [#8][#6H0][#6H1]                  | 0.256  | [#8]=[#6H0][#6H1]                      | 0.6546 |
| OCC[CH2]                          | 0.2413 | [CHX4]([CH3X4])[CH2X4]                 | 0.6852 |
| CCCCC                             | 0.2125 | [CX3H0](=[OX1H0])([CX4H1])[CX3H0]      | 0.708  |

---

Example 26 true smiles: CCOC(=O)CC(C)=O formula: C6H10O3  
Index of correct structure: 0 of 6069  
True structure loss: 0.020259  
True structure:

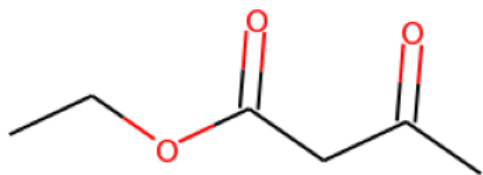

Experimental <sup>13</sup>C NMR (solvent: CDCl<sub>3</sub>)

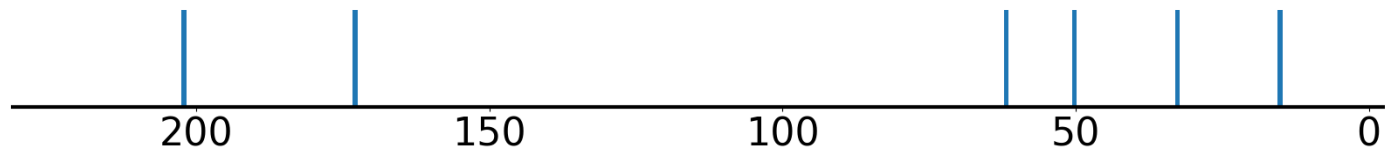

Experimental <sup>1</sup>H NMR (solvent: CDCl<sub>3</sub>)

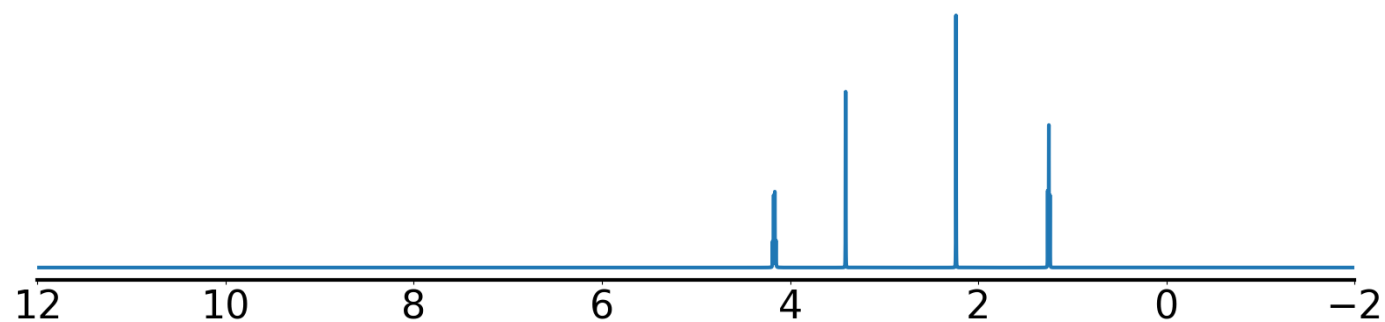

Top predicted structures (loss):

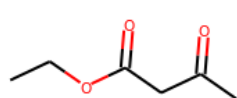

0.020259

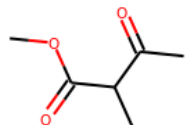

0.053425

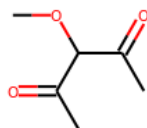

0.056301

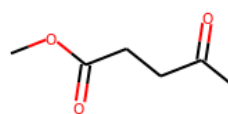

0.058655

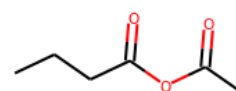

0.058773

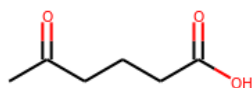

0.063125

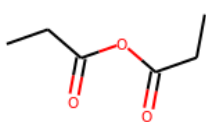

0.065091

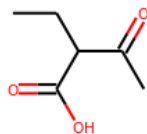

0.066846

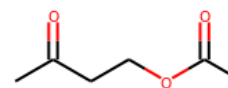

0.066941

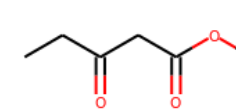

0.069215

| Top predicted substructures | prob        |                                   |             |
|-----------------------------|-------------|-----------------------------------|-------------|
| [CX4H3]                     | 1.0         | [OX1H0]=[CX3H0][CX4H3]            | 0.9894      |
| [CX3](=[OX1])C              | 1.0         | [#6H3][#6H0]                      | 0.9881      |
| [CX4H3][CX3H0]              | 0.9977      | [CX3](=[OX1])O                    | 0.9699      |
| [CX4H3][#6]                 | 0.9968      | [#8]=[#6][#8]                     | 0.9648      |
| [CX4H3][CX3]                | 0.9959      | [#6H3][#6][#6]                    | 0.9262      |
| <b>best positives</b>       | <b>prob</b> | <b>best negatives</b>             | <b>prob</b> |
| [CX4H3]                     | 1.0         | CCC#CC#C                          | 0.0         |
| [CX3](=[OX1])C              | 1.0         | [#6X2][#6H1][#6X2]                | 0.0         |
| [CX4H3][CX3H0]              | 0.9977      | CC=CC#CC                          | 0.0         |
| [CX4H3][#6]                 | 0.9968      | CCC=CC#C                          | 0.0         |
| [CX4H3][CX3]                | 0.9959      | [CX3H1](=[CX3H2])[CX2H0]          | 0.0         |
| [OX1H0]=[CX3H0][CX4H3]      | 0.9894      | [#7][#6]=[#6][#6][#7]             | 0.0         |
| [#6H3][#6H0]                | 0.9881      | [CX2H0](#[CX2H0])[CX2H0]          | 0.0         |
| [CX3](=[OX1])O              | 0.9699      | C=CC=CC#C                         | 0.0         |
| [#8]=[#6][#8]               | 0.9648      | [CX2H0](#[CX2H1])[CX2H0]          | 0.0         |
| [#6H3][#6][#6]              | 0.9262      | [CX2H0](#[CX2H1])[CX4H0]          | 0.0         |
| <b>worst negatives</b>      | <b>prob</b> | <b>worst positives</b>            | <b>prob</b> |
| [#6H3][#6][#6X3]            | 0.6399      | [CX4H2](#[6])[O]                  | 0.2969      |
| [#6H1]                      | 0.507       | [OX2H0][CX3H0][CX4H2]             | 0.3147      |
| [CX4H3][OX2H0]              | 0.4892      | [#6H3][#6X3H0][#6H2]              | 0.3208      |
| [#8]=[#6H0][#6H1]           | 0.3417      | [CX4H3][CX4H2]                    | 0.3337      |
| [CX4H2]CC=O                 | 0.3348      | [CX3H0](=[OX1H0])([CX4H3])[CX4H2] | 0.3771      |
| [#8]=[#6][#6]=[#8]          | 0.2967      | [OX1H0]=[CX3H0](#[6])[CX4H2]      | 0.3901      |
| [#8][#6][#6][#6][#6]=[#8]   | 0.2391      | [CX4H3][CX4]O                     | 0.488       |
| [#8][#6H0][#6H1]            | 0.2331      | [CH3][#6][#8]                     | 0.523       |
| [OX2H1]                     | 0.2226      | [#6X3][#6][#6][#6H3]              | 0.5452      |
| [#6H1][#6H2]                | 0.2034      | [CX4H2]( [OX2H0] ) [CX4H3]        | 0.6337      |

---

Example 27 true smiles: Cc1ccc(O)c(O)c1 formula: C7H8O2  
 Index of correct structure: 2 of 5977  
 True structure loss: 0.017126  
 True structure:

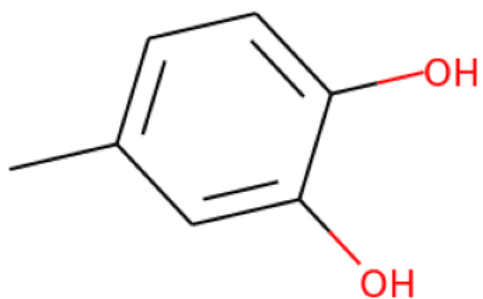

Experimental <sup>13</sup>C NMR (solvent: CDCl<sub>3</sub>)

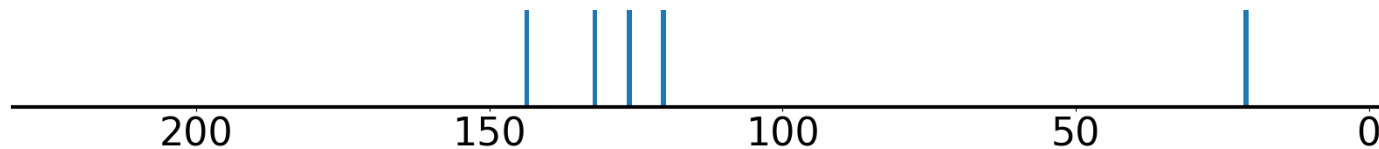

Experimental <sup>1</sup>H NMR (solvent: D<sub>2</sub>O)

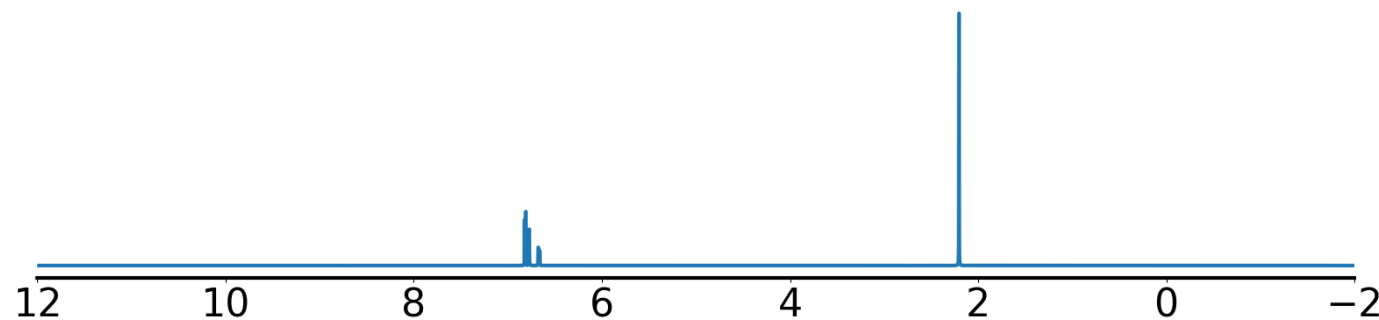

Top predicted structures (loss):

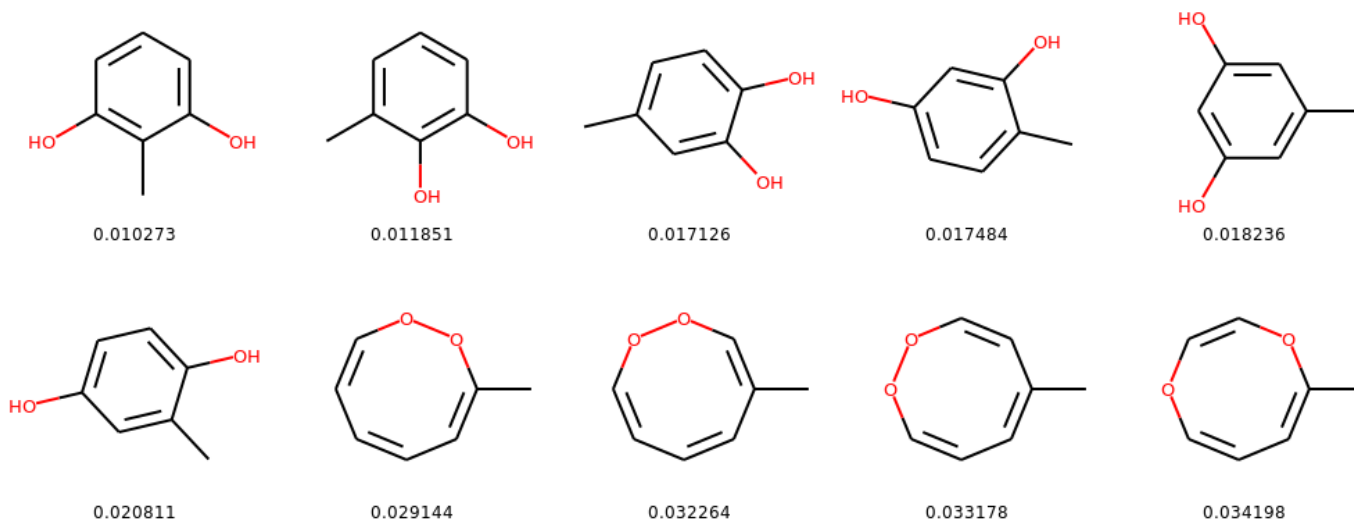



| Top predicted substructures      | prob        |                                           | prob        |
|----------------------------------|-------------|-------------------------------------------|-------------|
| [#6X3][#6X3][#6X3][#6X3]         | 0.9969      | [#6H3][#6H0]                              | 0.9832      |
| [#6X3][#6X3]                     | 0.9952      | [#6X3H1][#6X3H0]                          | 0.9797      |
| [#6H1]                           | 0.9928      | [#6H3][#6][#6]                            | 0.9732      |
| [CX4H3]                          | 0.9919      | [cH]                                      | 0.9326      |
| [CX4H3][#6]                      | 0.984       | [#6X3][#6][#6][#6H3]                      | 0.9161      |
| <b>best positives</b>            | <b>prob</b> | <b>best negatives</b>                     | <b>prob</b> |
| [#6X3][#6X3][#6X3][#6X3]         | 0.9969      | [CX4H1]([NX3H2])([CX4H2])[CX3H1]          | 0.0         |
| [#6X3][#6X3]                     | 0.9952      | [CX4H2]([NX2H0])[CX4H1]                   | 0.0         |
| [#6H1]                           | 0.9928      | [OX1H0]=[CX3H0]1[CX4H1][CX4H1][CX4H2]1    | 0.0         |
| [CX4H3]                          | 0.9919      | [CX4H0]([NX3H1])([CX4H3])([CX4H2])[CX4H1] | 0.0         |
| [CX4H3][#6]                      | 0.984       | [CX4H0]([NX3H1])([CX4H2])([CX4H2])[CX4H1] | 0.0         |
| [#6H3][#6H0]                     | 0.9832      | [#6H3][#6H1][#7][#7]                      | 0.0         |
| [#6X3H1][#6X3H0]                 | 0.9797      | [CX4H1]([NX3H0])([CX4H1])[CX4H1]          | 0.0         |
| [#6H3][#6][#6]                   | 0.9732      | [CX4H1]([NX3H0])([CX4H2])[CX4H0]          | 0.0         |
| [cH]                             | 0.9326      | [CX4H1]([NX3H0])([CX4H2])[CX4H1]          | 0.0         |
| [#6X3][#6][#6][#6H3]             | 0.9161      | [CX3H0](=[NX2H1])([NX3H1])[CX4H1]         | 0.0         |
| <b>worst negatives</b>           | <b>prob</b> | <b>worst positives</b>                    | <b>prob</b> |
| [cX3H1]([cX3H1])[cX3H1]          | 0.3751      | [cX3H0][cX3H1][cX3H0][OX2H1]              | 0.1083      |
| [cX3H0]([cX3H1])([cX3H0])[CX4H3] | 0.2836      | [cX3H0][cX3H1][cX3H1][cX3H0]              | 0.1496      |
| [CH3][#6][#8]                    | 0.2673      | [cX3H1]([cX3H0])[cX3H0]                   | 0.1797      |
| [CHX3]=[CHX3]                    | 0.1661      | [#6X3H1][#6X3H1][#6X3H0][#6X3H1]          | 0.2458      |
| o[cH]                            | 0.1549      | [#8][#6X3][#6X3][#6X3][#6H3]              | 0.3621      |
| [#8]=[#6][#8]                    | 0.1518      | [#8][#6][#6][#8]                          | 0.4955      |
| [CX3H](O)                        | 0.131       | [#6H1][#6H1]                              | 0.558       |
| [#6H3][#6]=[#6X3]                | 0.1016      | [#8][#6H0][#6H1]                          | 0.5874      |
| [#6H][#8][#6H]                   | 0.0997      | [cX3H0]([cX3H1])([cX3H0])[OX2H1]          | 0.6927      |
| [O][CX3H1]=[CX3H1]               | 0.0992      | [#6]1[#6][#6][#6][#6]1                    | 0.7131      |

---

Example 28 true smiles: Nc1ccnc1N formula: C5H7N3  
Index of correct structure: 1 of 5951  
True structure loss: 0.017388  
True structure:

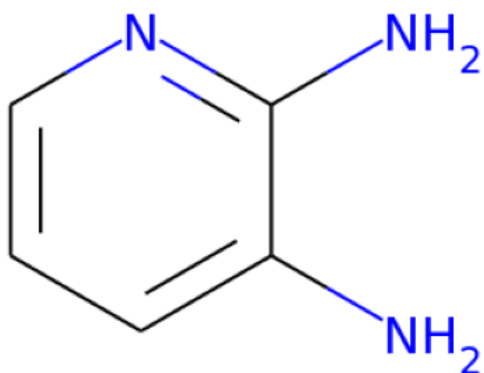

Experimental  $^{13}\text{C}$  NMR (solvent: DMSO)

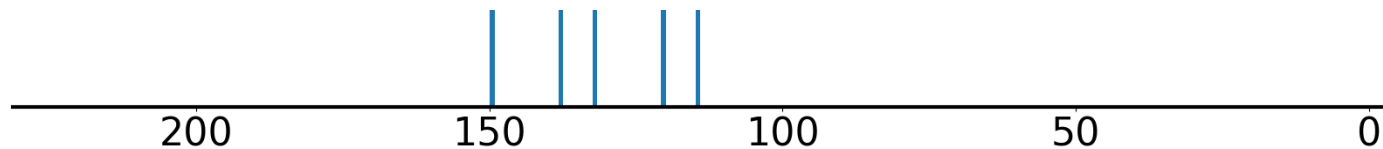

Experimental  $^1\text{H}$  NMR (solvent:  $\text{CDCl}_3$ )

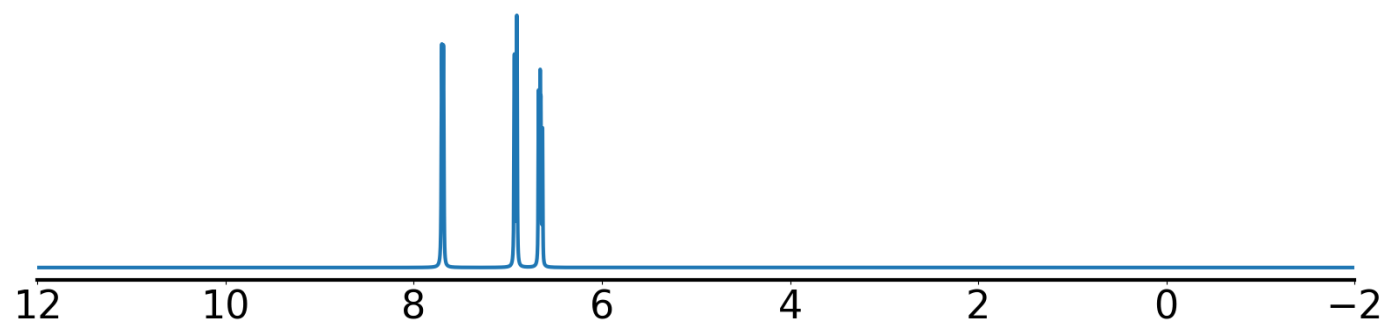

Top predicted structures (loss):

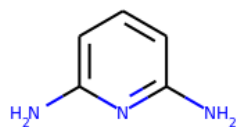

0.014871

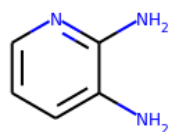

0.017388

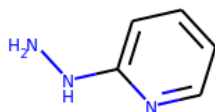

0.021729

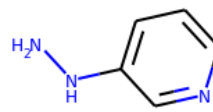

0.024243

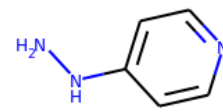

0.024512

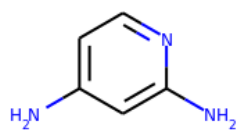

0.024764

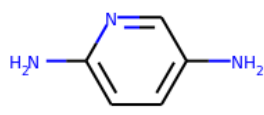

0.026398

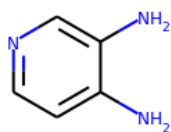

0.027241

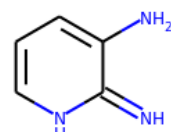

0.031042

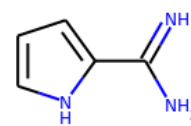

0.033035

| Top predicted substructures      | prob        |                                       | prob        |
|----------------------------------|-------------|---------------------------------------|-------------|
| [#6H1]                           | 0.9999      | [#7][#6][#6X3]                        | 0.9882      |
| [cH][cH]                         | 0.9993      | [cX3H1]([cX3H1])[cX3H1]               | 0.9851      |
| [#6X3][#6X3][#6X3][#6X3]         | 0.9974      | [cH]                                  | 0.9827      |
| [#6X3][#6X3]                     | 0.9965      | [#7][#6][#6][#6X3]                    | 0.9598      |
| [cX3H1]([cX3H1])[cX3H0]          | 0.9895      | [#6X3H1][#6X3H0]                      | 0.9563      |
| <b>best positives</b>            | <b>prob</b> | <b>best negatives</b>                 | <b>prob</b> |
| [#6H1]                           | 0.9999      | [OX2H0]1[CX4H2][CX4H2][CX4H1][CX4H1]1 | 0.0         |
| [cH][cH]                         | 0.9993      | [OX2H0][CX4H2][CX4H2][CX4H1][OX2H0]   | 0.0         |
| [#6X3][#6X3][#6X3][#6X3]         | 0.9974      | [OX2H1][CX4H1]1[CX4H1][CX4H2][CX4H1]1 | 0.0         |
| [#6X3][#6X3]                     | 0.9965      | [OX2H0][CX4H2][CX4H1]([CX4H1])[CX4H3] | 0.0         |
| [cX3H1]([cX3H1])[cX3H0]          | 0.9895      | [#8][#6H1][#6H2][#6H1]=[#8]           | 0.0         |
| [#7][#6][#6X3]                   | 0.9882      | [OX2H0][CX4H1][CX4H1]([CX4H1])[CX4H2] | 0.0         |
| [cX3H1]([cX3H1])[cX3H1]          | 0.9851      | [CX4H1]([OX2H0])([CX4H2])[CX2H0]      | 0.0         |
| [cH]                             | 0.9827      | [OX2H0][CX4H2][CX4H0][OX2H0]          | 0.0         |
| [#7][#6][#6][#6X3]               | 0.9598      | [OX2H0]1[CX4H2][CX4H2][CX4H0]1        | 0.0         |
| [#6X3H1][#6X3H0]                 | 0.9563      | [OX2H0][CX4H2][CX4H1]([CX4H1])[CX4H1] | 0.0         |
| <b>worst negatives</b>           | <b>prob</b> | <b>worst positives</b>                | <b>prob</b> |
| [#6X3][#7X3][#6X3]               | 0.6904      | [cX3H1]([nX2H0])[cX3H1]               | 0.2669      |
| [#6X3H1][#6X3H1][#6X3H0][#6X3H1] | 0.6416      | [#7][#6][#6][#7]                      | 0.2723      |
| [#7][#7]                         | 0.4984      | [#7][#6H0][#7]                        | 0.35        |
| [#7X3H1]                         | 0.4727      | [#7][#6][#6][#6][#6][#7]              | 0.3975      |
| [#7H][#6X3H1]                    | 0.4332      | [#7][#6][#7]                          | 0.5897      |
| [#7]=[#6][#6][#6X3]              | 0.3247      | [#6]1[#6][#6][#6][#6][#7]1            | 0.6015      |
| [#6]1[#6][#6][#6][#6][#6]1       | 0.3178      | [#7H2][#6H0]                          | 0.7063      |
| [#6]1[#6][#6][#6][#7]1           | 0.3151      | [#7][#6H0][#6H1]                      | 0.7875      |
| [NH1]=[#6][#7]                   | 0.2905      | [#6X3][#7][#6X3]                      | 0.8356      |
| [#7][#6][#6][#6][#7]             | 0.2805      | [#7][#6X3H0][#6X3H1]                  | 0.8627      |

---

Example 29 true smiles: Nc1ccncc1N formula: C5H7N3  
Index of correct structure: 5 of 5951  
True structure loss: 0.025336  
True structure:

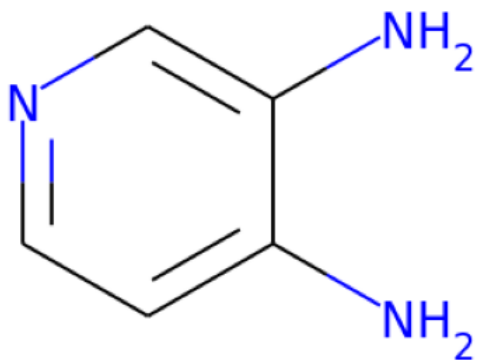

Experimental <sup>13</sup>C NMR (solvent: DMSO)

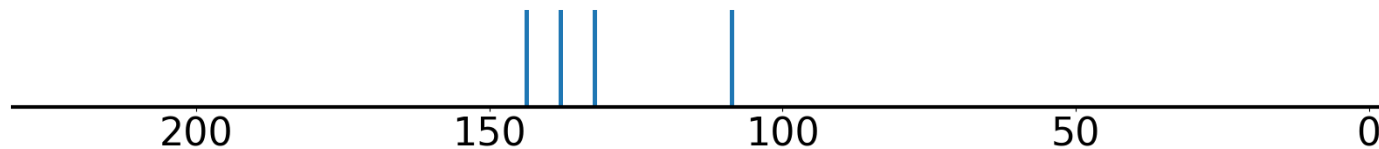

Experimental <sup>1</sup>H NMR (solvent: CDCl<sub>3</sub>)

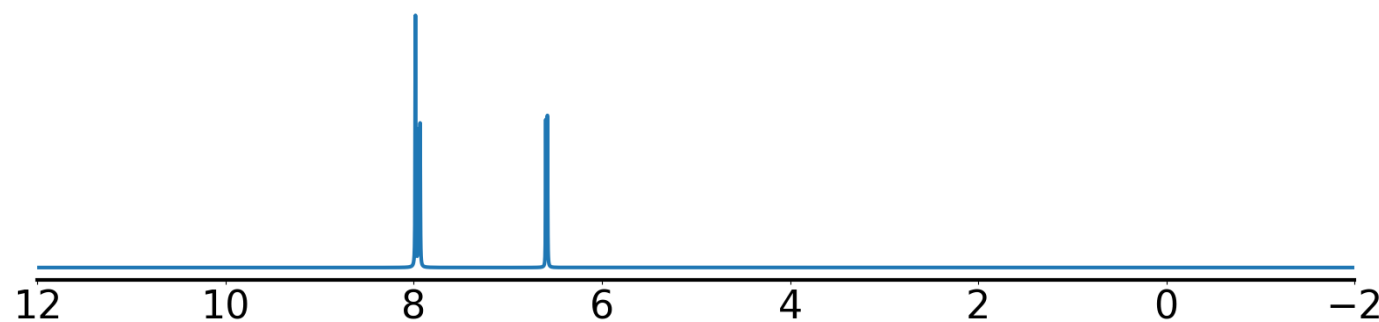

Top predicted structures (loss):

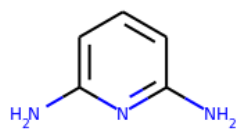

0.019781

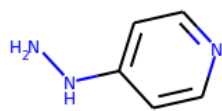

0.021108

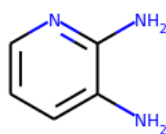

0.02353

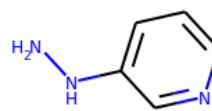

0.024253

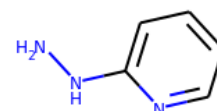

0.024296

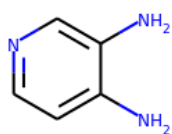

0.025336

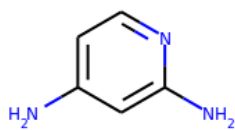

0.025991

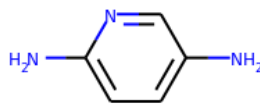

0.02814

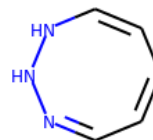

0.02965

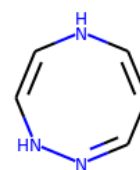

0.031571

| Top predicted substructures      | prob   |                                              |  |        |
|----------------------------------|--------|----------------------------------------------|--|--------|
| [#6H1]                           | 0.9997 | [#6X3H1][#6X3H0]                             |  | 0.9422 |
| [#6X3][#6X3]                     | 0.9953 | [cX3H1]([cX3H1])[cX3H0]                      |  | 0.9216 |
| [cH][cH]                         | 0.9702 | [#7][#6][#6][#6X3]                           |  | 0.9143 |
| [cH]                             | 0.9672 | [#6H1][#6H1]                                 |  | 0.8697 |
| [#7][#6][#6X3]                   | 0.9487 | [#6X3][#7][#6X3]                             |  | 0.7855 |
| best positives                   | prob   | best negatives                               |  | prob   |
| [#6H1]                           | 0.9997 | [OX2H0]1[OX4H2][CX4H2][CX4H1][CX4H1]1        |  | 0.0    |
| [#6X3][#6X3]                     | 0.9953 | [OX2H1][CX4H1]1[OX4H1][CX4H2][CX4H1]1        |  | 0.0    |
| [cH][cH]                         | 0.9702 | [CX4H1]([OX2H0])([CX4H2])[CX2H0]             |  | 0.0    |
| [cH]                             | 0.9672 | [OX2H0][CX4H2][CX4H1]([CX4H1])[CX4H1]        |  | 0.0    |
| [#7][#6][#6X3]                   | 0.9487 | [CX4H0]([OX2H0])([CX4H3])([CX4H2])[CX4H2]    |  | 0.0    |
| [#6X3H1][#6X3H0]                 | 0.9422 | [CX4H1]([OX2H1])([CX4H2])[CX2H0]             |  | 0.0    |
| [cX3H1]([cX3H1])[cX3H0]          | 0.9216 | [OX2H0][CX4H1][CX4H1]([CX4H2][CX4H1])[CX4H1] |  | 0.0    |
| [#7][#6][#6][#6X3]               | 0.9143 | [OX1H0]=[CX3H0]1[OX4H1][CX4H1][CX4H2]1       |  | 0.0    |
| [#6H1][#6H1]                     | 0.8697 | [OX2H0][CX4H2][CX4H0][OX2H0]                 |  | 0.0    |
| [#6X3][#7][#6X3]                 | 0.7855 | [OX2H1][CX4H2][CX4H1]([CX4H2])[CX4H2]        |  | 0.0    |
| worst negatives                  | prob   | worst positives                              |  | prob   |
| [cX3H1]([cX3H1])[cX3H1]          | 0.7634 | [#7][#6][#6][#6][#6][#7]                     |  | 0.107  |
| [#6X3][#7X3][#6X3]               | 0.5853 | [cX3H1]([nX2H0])[cX3H0]                      |  | 0.2153 |
| [#7X3H1]                         | 0.5513 | [#7][#6][#6][#7]                             |  | 0.2168 |
| [#7][#7]                         | 0.5195 | [#7][#6][#6][#6][#7]                         |  | 0.3733 |
| [#7H][#6X3H1]                    | 0.4874 | [#6]1[#6][#6][#6][#6][#7]1                   |  | 0.3814 |
| [#6X3H1][#6X3H1][#6X3H0][#6X3H1] | 0.4676 | [#7H2][#6H0]                                 |  | 0.388  |
| [NH1]=[#6][#7]                   | 0.4448 | [#6H1][#7][#6H1]                             |  | 0.4014 |
| [#6]=[#7H]                       | 0.4223 | [cX3H1]([nX2H0])[cX3H1]                      |  | 0.455  |
| [#7][#6][#7]                     | 0.4072 | [#7][#6H0][#6H1]                             |  | 0.7144 |
| [#7][#6]=[#7]                    | 0.3363 | [#7X3H2]                                     |  | 0.7193 |

---

Example 30 true smiles: Nc1ccccc1N formula: C6H8N2  
Index of correct structure: 0 of 4358  
True structure loss: 0.01771  
True structure:

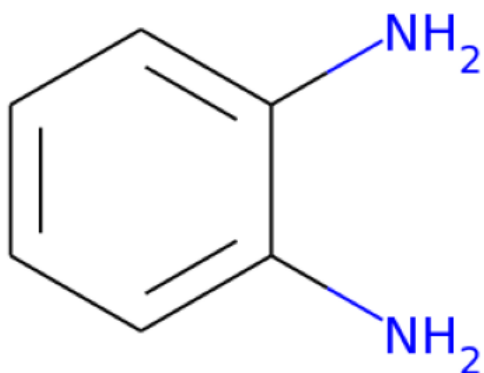

Experimental <sup>13</sup>C NMR (solvent: CDCl<sub>3</sub>)

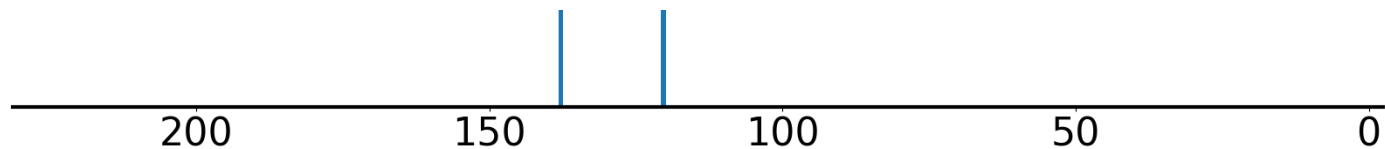

Experimental <sup>1</sup>H NMR (solvent: CDCl<sub>3</sub>)

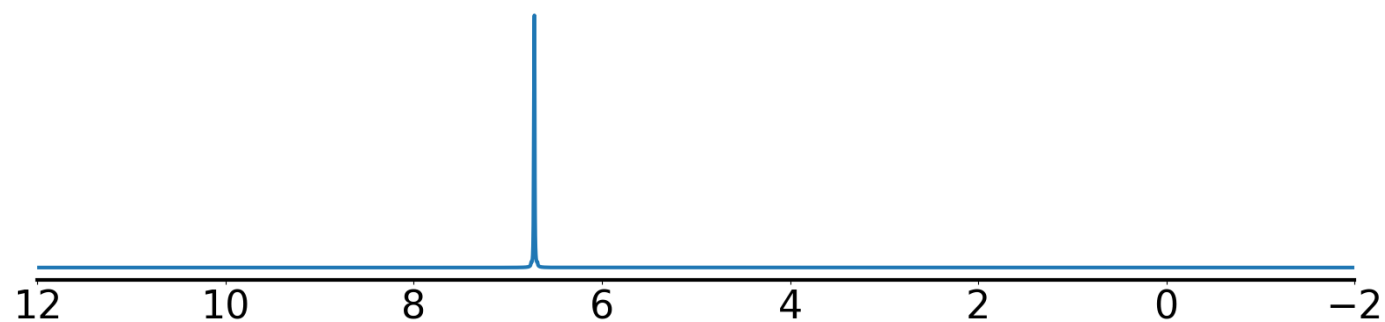

Top predicted structures (loss):

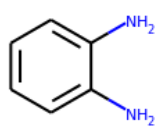

0.01771

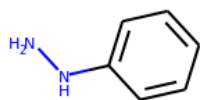

0.019543

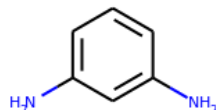

0.021588

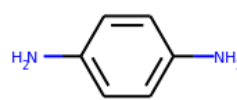

0.021869

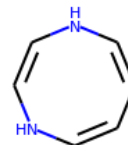

0.023951

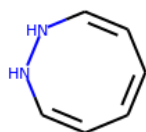

0.024944

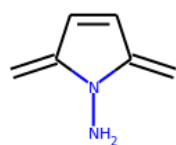

0.032202

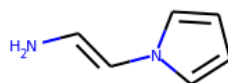

0.036647

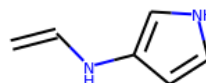

0.037697

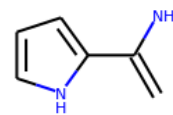

0.041615

|                                  |        |                                           |        |
|----------------------------------|--------|-------------------------------------------|--------|
| Top predicted substructures      | prob   |                                           |        |
| [#6H1]                           | 0.981  | [#7][#6][#6X3]                            | 0.9058 |
| [#6X3][#6X3]                     | 0.9786 | [#6X3H1][#6X3H0]                          | 0.8657 |
| [#6X3][#6X3][#6X3][#6X3]         | 0.9771 | [#7][#6][#6][#6X3]                        | 0.8447 |
| [cH][cH]                         | 0.9317 | [#6H1][#6H1]                              | 0.8107 |
| [cH]                             | 0.9289 | [cX3H1]([cX3H1])[cX3H0]                   | 0.7935 |
| best positives                   | prob   | best negatives                            | prob   |
| [#6H1]                           | 0.981  | [OX2H0]1[CX4H2][CX4H2][CX4H1][CX4H1]1     | 0.0    |
| [#6X3][#6X3]                     | 0.9786 | [OX2H1][CX4H1]1[CX4H1][CX4H2][CX4H1]1     | 0.0    |
| [#6X3][#6X3][#6X3][#6X3]         | 0.9771 | [OX2H0][CX4H2][CX4H2][CX4H1][OX2H0]       | 0.0    |
| [cH][cH]                         | 0.9317 | [OX2H0]1[CX4H2][CX4H1][CX4H1]1            | 0.0    |
| [cH]                             | 0.9289 | [OX2H0][CX4H2][CX4H1]([CX4H1])[CX4H3]     | 0.0    |
| [#7][#6][#6X3]                   | 0.9058 | [#8][#6H1][#6H2][#6H1]=[#8]               | 0.0    |
| [#6X3H1][#6X3H0]                 | 0.8657 | [CX4H0]([OX2H1])([CX4H3])([CX4H2])[CX4H1] | 0.0    |
| [#7][#6][#6][#6X3]               | 0.8447 | [OX1H0]=[CX3H0]1[CX4H1][CX4H1][CX4H2]1    | 0.0    |
| [#6H1][#6H1]                     | 0.8107 | [OX2H0][CX4H2][CX4H0][OX2H0]              | 0.0    |
| [cX3H1]([cX3H1])[cX3H0]          | 0.7935 | [CX4H1]([OX2H0])([CX4H2])[CX2H0]          | 0.0    |
| worst negatives                  | prob   | worst positives                           | prob   |
| [#6H1][#7][#6H1]                 | 0.6072 | [#7][#6][#6][#7]                          | 0.1767 |
| [#6X3][#7][#6X3]                 | 0.5978 | [#6]1[#6][#6][#6][#6][#6]1                | 0.452  |
| [#6X3][#7X3][#6X3]               | 0.5857 | [#7H2][#6H0]                              | 0.4854 |
| [#6]1[#6][#6][#6][#7]1           | 0.5451 | [#7][#6H0][#6H1]                          | 0.5142 |
| [#6X3H1][#6X3H1][#6X3H0][#6X3H1] | 0.5094 | [#7][#6X3H0][#6X3H1]                      | 0.5562 |
| [#7H][#6X3H1]                    | 0.5056 | [#7X3H2]                                  | 0.7118 |
| [#7X3H1]                         | 0.5037 | [cX3H1]([cX3H1])[cX3H1]                   | 0.7809 |
| [#6H1r5][#7]                     | 0.4704 | [cX3H1]([cX3H1])[cX3H0]                   | 0.7935 |
| [cX3H1]([nX3H1])[cX3H0]          | 0.3558 | [#6H1][#6H1]                              | 0.8107 |
| [cX3H1]([nX3H1])[cX3H1]          | 0.2789 | [#7][#6][#6][#6X3]                        | 0.8447 |

---

Example 31 true smiles: CNC(C)(C)C(=O)O formula: C5H11NO2  
 Index of correct structure: 15 of 3703  
 True structure loss: 0.046642  
 True structure:

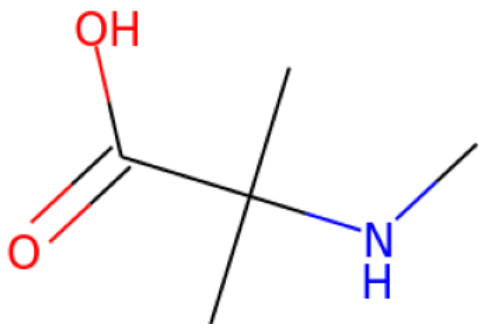

Experimental <sup>13</sup>C NMR (solvent: D<sub>2</sub>O)

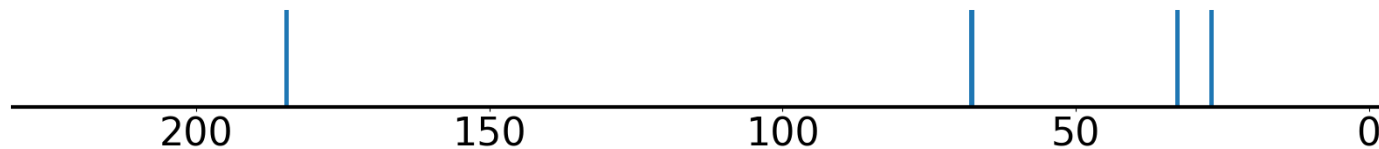

Experimental <sup>1</sup>H NMR (solvent: D<sub>2</sub>O)

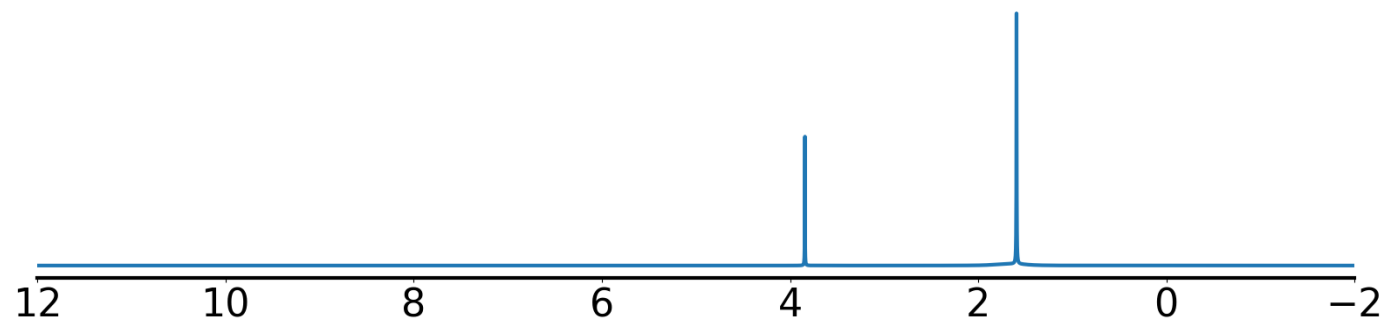

Top predicted structures (loss):

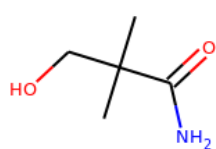

0.02522

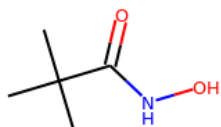

0.027341

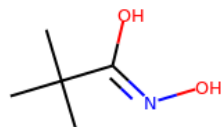

0.031369

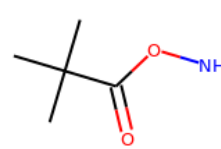

0.032131

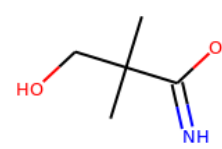

0.032692

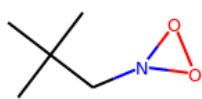

0.033951

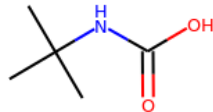

0.036758

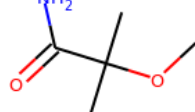

0.03894

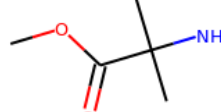

0.040791

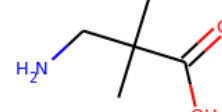

0.041005



|                               |        |                                |        |
|-------------------------------|--------|--------------------------------|--------|
| Top predicted substructures   | prob   |                                |        |
| [CX4H3]                       | 0.9759 | [#6H3][#6H0]                   | 0.8876 |
| [CX4H3][#6]                   | 0.9449 | [OX1H0]=[CX3H0][CX4H0][CX4H3]  | 0.7469 |
| [CX3](=[OX1])C                | 0.9448 | [#7X3H2]                       | 0.7278 |
| [OX2H1]                       | 0.917  | [CX4H2]([#6])[O]               | 0.7191 |
| [#6H3][#6][#6]                | 0.9131 | [#7X3][#6H2]                   | 0.6466 |
| best positives                | prob   | best negatives                 | prob   |
| [CX4H3]                       | 0.9759 | C=CCC#C                        | 0.0    |
| [CX4H3][#6]                   | 0.9449 | [CX2H0](#[CX2H1])[CX3H0]       | 0.0    |
| [CX3](=[OX1])C                | 0.9448 | CCC#CC#C                       | 0.0    |
| [OX2H1]                       | 0.917  | [CX2H0](#[CX2H1])[CX4H2]       | 0.0    |
| [#6H3][#6][#6]                | 0.9131 | C=CC=CC#C                      | 0.0    |
| [#6H3][#6H0]                  | 0.8876 | CCC=CC#C                       | 0.0    |
| [OX1H0]=[CX3H0][CX4H0][CX4H3] | 0.7469 | CC#CCC#C                       | 0.0    |
| [CX4H3][CX4H0]                | 0.5924 | [#6X2][#6H1][#6X2]             | 0.0    |
| [#6H3][#6][#6X3]              | 0.4327 | [CX2H1]#[CX2H0][CX3H1]=[CX3H0] | 0.0    |
| [#8]=[#6][#8]                 | 0.4136 | [CX3H1](=[CX3H1])[CX2H0]       | 0.0    |
| worst negatives               | prob   | worst positives                | prob   |
| [#7X3H2]                      | 0.7278 | [#6H3][#6H0][#7][#6H3]         | 0.0064 |
| [CX4H2]([#6])[O]              | 0.7191 | [#7X3][#6H3]                   | 0.0114 |
| [#7X3][#6H2]                  | 0.6466 | [#7][#6][#6H3]                 | 0.0727 |
| [CH2X4](O)[CX4H2][CX4H2]      | 0.558  | [#6H3][#7]                     | 0.087  |
| [#7H2][#6H0]                  | 0.4795 | [CX4H3][NX3H1]                 | 0.0945 |
| OCC[CH2]                      | 0.444  | [CX3](=O)[OX2H1]               | 0.1341 |
| [#7][#6H2]                    | 0.4421 | [#7X3H1]                       | 0.152  |
| [CX4H2][CX4H2]                | 0.428  | [CH3]CC[OH]                    | 0.161  |
| [CX4H2]([OX2H1])[CX4H0]       | 0.3945 | [#7][#6][#6X3]                 | 0.1724 |
| [#8][#6][#6]=[#8]             | 0.3779 | [CX4H3][CX4H0][CX4H3]          | 0.2059 |

---

Example 32 true smiles: CC(C)C(N)C(=O)O formula: C5H11NO2  
 Index of correct structure: 4 of 3703  
 True structure loss: 0.029994  
 True structure:

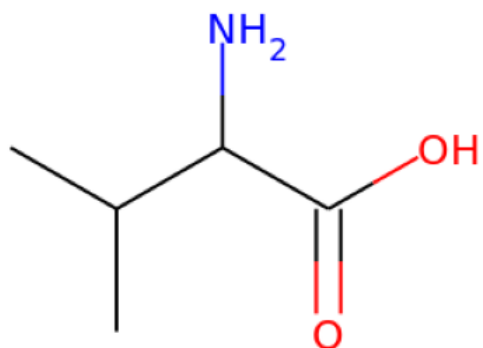

Experimental <sup>13</sup>C NMR (solvent: D2O)

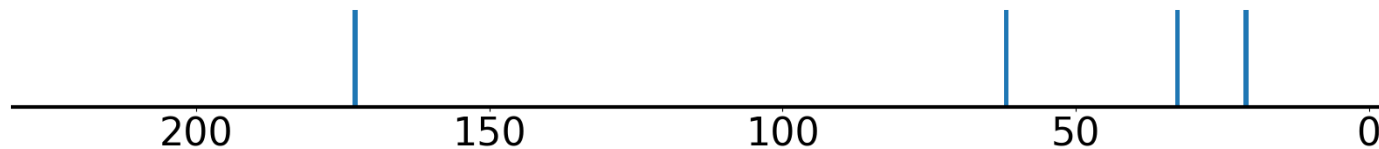

Experimental <sup>1</sup>H NMR (solvent: D2O)

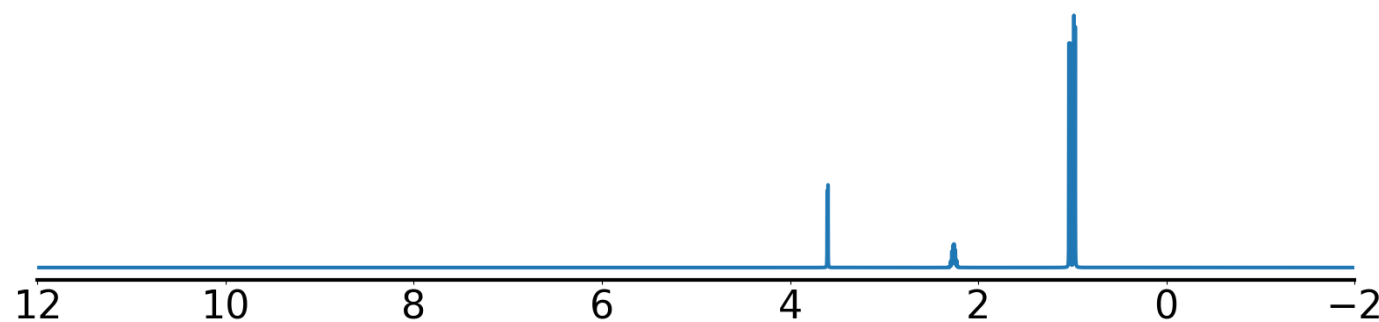

Top predicted structures (loss):

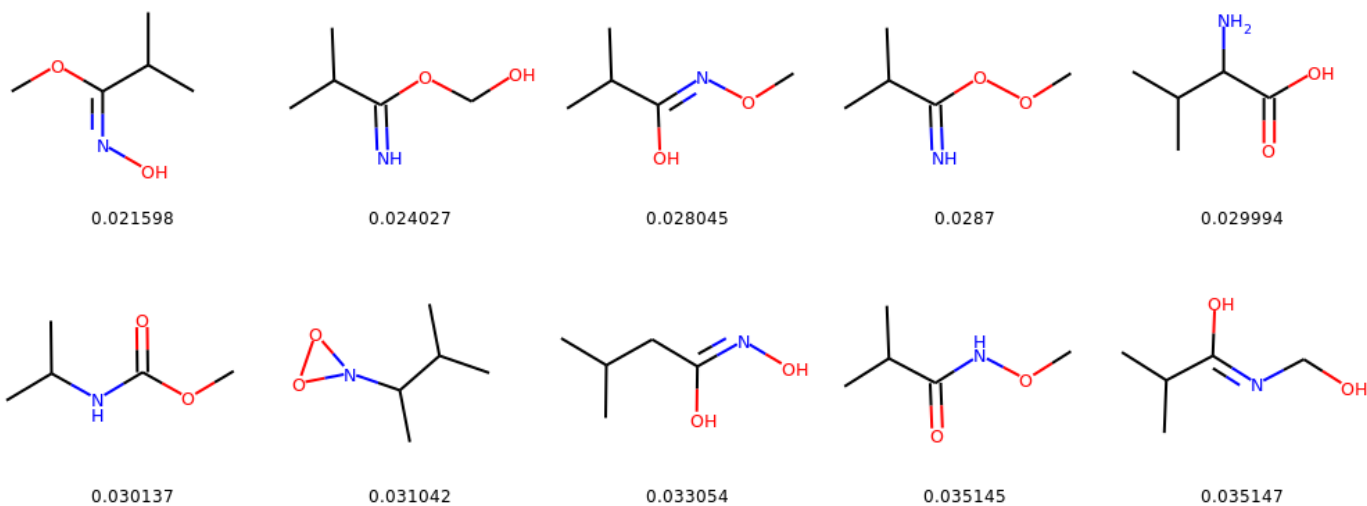

|                                  |        |                                   |        |
|----------------------------------|--------|-----------------------------------|--------|
| Top predicted substructures      | prob   |                                   |        |
| [CX4H3]                          | 1.0    | [#6H1]                            | 0.9041 |
| [#6H3][#6][#6]                   | 0.9986 | [CX4H3][CX4H1]                    | 0.9018 |
| [CX4H3][#6]                      | 0.9905 | [CX3](=[OX1])C                    | 0.8841 |
| [CHX4]([CH3X4])[CH3X4]           | 0.9588 | [#8]=[#6][#8]                     | 0.8539 |
| [OX2H1]                          | 0.9386 | [CX3](=[OX1])O                    | 0.7789 |
| best positives                   | prob   | best negatives                    | prob   |
| [CX4H3]                          | 1.0    | C=CC=CC#C                         | 0.0    |
| [#6H3][#6][#6]                   | 0.9986 | CC=CC#CC                          | 0.0    |
| [CX4H3][#6]                      | 0.9905 | [CX2H1]#[CX2H0][CX3H1]=[CX3H0]    | 0.0    |
| [CHX4]([CH3X4])[CH3X4]           | 0.9588 | [CX2H0](#[CX2H1])[CX3H0]          | 0.0    |
| [OX2H1]                          | 0.9386 | CCC#CC#C                          | 0.0    |
| [#6H1]                           | 0.9041 | C=CCCC#C                          | 0.0    |
| [CX4H3][CX4H1]                   | 0.9018 | CCC=CC#C                          | 0.0    |
| [CX3](=[OX1])C                   | 0.8841 | [CX3H1](=[CX3H2])[CX2H0]          | 0.0    |
| [#8]=[#6][#8]                    | 0.8539 | [CX2H0](#[CX2H1])[CX4H2]          | 0.0    |
| [CX3](=[OX1])O                   | 0.7789 | CC#CCC=C                          | 0.0    |
| worst negatives                  | prob   | worst positives                   | prob   |
| [CX4H1]([CX4H3])([CX4H3])[CX3H0] | 0.7252 | [#7H2][#6X4H1][#6X3]              | 0.0877 |
| [#6H3][#6][#6X3]                 | 0.5599 | [CX4H1]([CX4H3])([CX4H3])[CX4H1]  | 0.0972 |
| [CX4H1]([CX4H3])([CX4H3])[CX4H2] | 0.3017 | [#8]=[#6][#6H1][#6H1]             | 0.1208 |
| [CX4H2]([#6])[O]                 | 0.2911 | [CX3H0](=[OX1H0])([OX2H1])[CX4H1] | 0.1229 |
| [#6H1][#6H2]                     | 0.2774 | O=[CX3][CX4H]                     | 0.1951 |
| [#7X3H1]                         | 0.2222 | [#8][#6H0][#6H1]                  | 0.2224 |
| [CX4H2][CX3]=O                   | 0.2122 | [#7][#6][#6X3]                    | 0.255  |
| [CHX4]([CH3X4])[CH2X4]           | 0.1853 | [#6H3][#6H1][#6H1][#7]            | 0.3035 |
| [#7H2][#6H0]                     | 0.1523 | [#7H2][#6H1]                      | 0.3157 |
| [#7]=[#6H0][#6H1]                | 0.1488 | [#6X3][#6][#6][#6H3]              | 0.3222 |

---

Example 33 true smiles: OCc1ccncc1 formula: C6H7NO  
Index of correct structure: 0 of 3639  
True structure loss: 0.012653  
True structure:

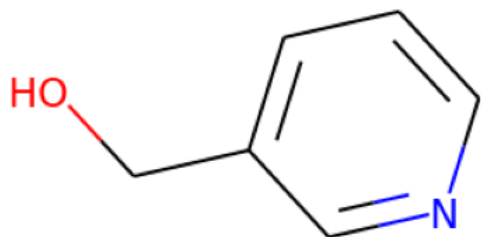

Experimental <sup>13</sup>C NMR (solvent: CDCl<sub>3</sub>)

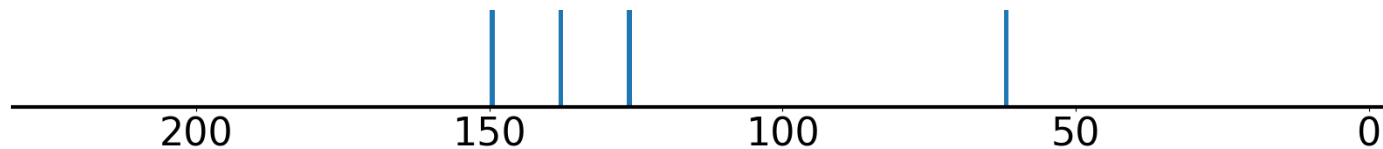

Experimental <sup>1</sup>H NMR (solvent: CDCl<sub>3</sub>)

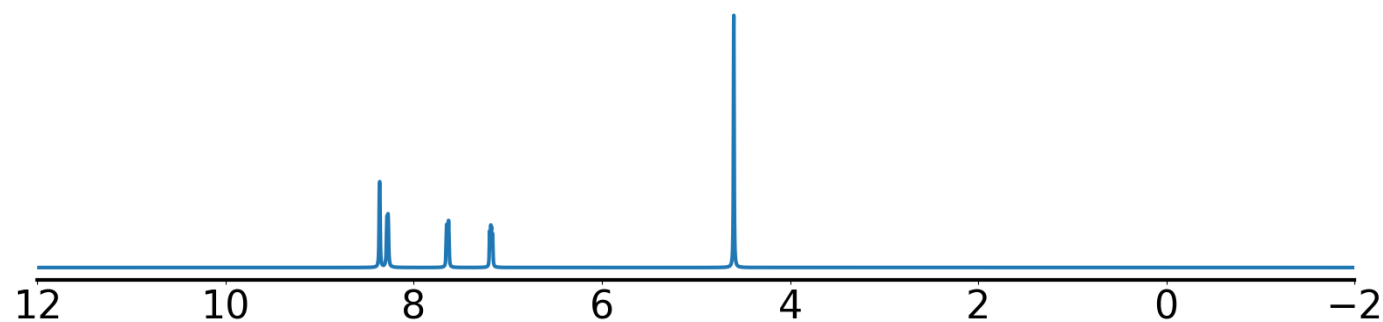

Top predicted structures (loss):

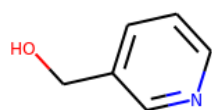

0.012653

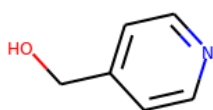

0.013761

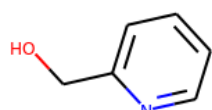

0.014018

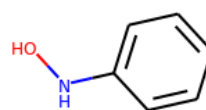

0.02853

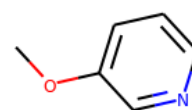

0.033872

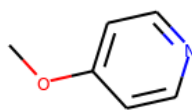

0.034979

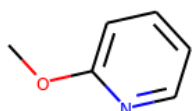

0.035236

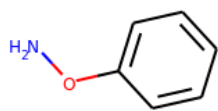

0.036679

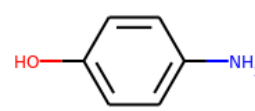

0.042206

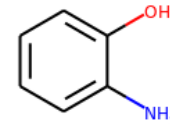

0.044977

| Top predicted substructures | prob        |                                           | prob        |
|-----------------------------|-------------|-------------------------------------------|-------------|
| [#6H1]                      | 0.9997      | [#6X3][#6X3][#6X3][#6X3]                  | 0.9476      |
| [#6X3][#6X3]                | 0.9943      | [cH]                                      | 0.9367      |
| [CX4H2]([#6])[O]            | 0.993       | [#6H1][#6H1]                              | 0.9243      |
| [cH][cH]                    | 0.9846      | [#6X3][#6H2][#8]                          | 0.8929      |
| [#7][#6][#6X3]              | 0.9809      | [OX2H1]                                   | 0.8841      |
| <b>best positives</b>       | <b>prob</b> | <b>best negatives</b>                     | <b>prob</b> |
| [#6H1]                      | 0.9997      | [OX2H0]1[CX4H2][CX4H2][CX4H1][CX4H1]1     | 0.0         |
| [#6X3][#6X3]                | 0.9943      | [OX1H0]=[CX3H0]1[CX4H1][CX4H1][CX4H2]1    | 0.0         |
| [CX4H2]([#6])[O]            | 0.993       | [CX4H0]([OX2H0])([CX4H3])([CX4H2])[CX4H1] | 0.0         |
| [cH][cH]                    | 0.9846      | [#8][#6H1][#6H2][#6H1]=[#8]               | 0.0         |
| [#7][#6][#6X3]              | 0.9809      | [OX2H1][CX4H1]1[CX4H1][CX4H2][CX4H1]1     | 0.0         |
| [#6X3][#6X3][#6X3][#6X3]    | 0.9476      | [CX4H0]([OX2H1])([CX4H3])([CX4H2])[CX4H1] | 0.0         |
| [cH]                        | 0.9367      | [CX3H0](=[OX1H0])([CX4H3])[CX4H0]         | 0.0         |
| [#6H1][#6H1]                | 0.9243      | [CX4H0]([NX3H1])([CX4H3])([CX4H2])[CX4H1] | 0.0         |
| [#6X3][#6H2][#8]            | 0.8929      | [CX4H1]([CX4H3])([CX4H2])[CX4H0]          | 0.0         |
| [OX2H1]                     | 0.8841      | [CX4H0]([OX2H0])([CX4H3])([CX4H2])[CX3H1] | 0.0         |
| <b>worst negatives</b>      | <b>prob</b> | <b>worst positives</b>                    | <b>prob</b> |
| [#6]1[#6][#6][#6][#6][#6]1  | 0.3921      | [cX3H1]([nX2H0])[cX3H0]                   | 0.3499      |
| [#7][#6X3H0][#6X3H1]        | 0.3219      | [#6H1][#7][#6H1]                          | 0.4155      |
| O[CX4H2][CX3H1]             | 0.2939      | [#6]1[#6][#6][#6][#6][#7]1                | 0.4914      |
| [#6H1r5][#7]                | 0.2464      | [#6X3H1][#6X3H1][#6X3H0][#6X3H1]          | 0.5667      |
| [CHX3]=[CHX3]               | 0.2314      | [#6X3][#7][#6X3]                          | 0.6243      |
| [#6H1][#6H2]                | 0.2237      | [#8][#6][#6][#6X3]                        | 0.6336      |
| [#7][#6H0][#6H1]            | 0.2221      | [OX2H1][CX4H2][#6X3H0]                    | 0.7152      |
| [#8][#6][#6]=[#6X3]         | 0.1747      | [cX3H1]([nX2H0])[cX3H1]                   | 0.7454      |
| [#8][#6H0][#6H1]            | 0.1624      | [CX4H2]([OX2H1])[cX3H0]                   | 0.7696      |
| [#7X3H2]                    | 0.153       | [#6X3H1][#6X3H0]                          | 0.7854      |

---

Example 34 true smiles: Nc1ccc(O)c1 formula: C6H7NO  
Index of correct structure: 0 of 3639  
True structure loss: 0.018182  
True structure:

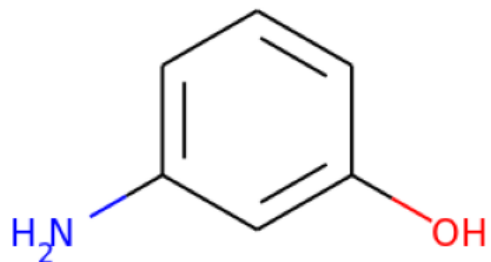

Experimental <sup>13</sup>C NMR (solvent: DMSO)

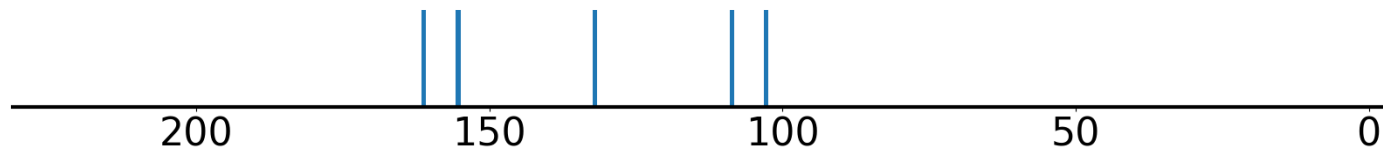

Experimental <sup>1</sup>H NMR (solvent: CDCl<sub>3</sub>)

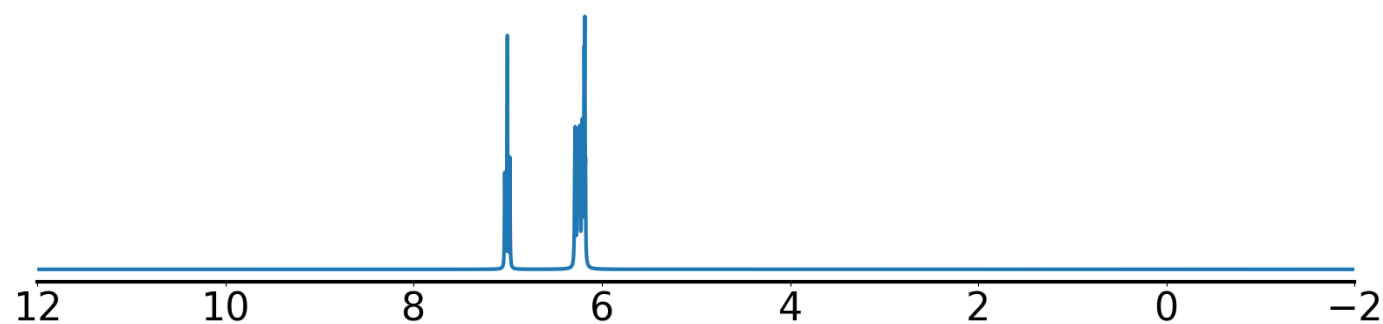

Top predicted structures (loss):

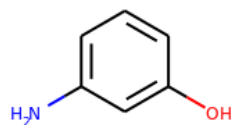

0.018182

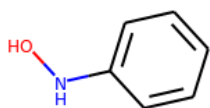

0.018349

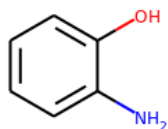

0.018708

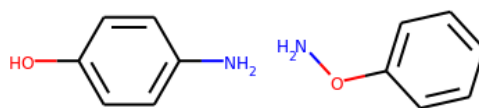

0.020537

0.022258

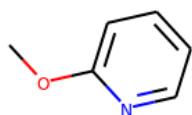

0.030054

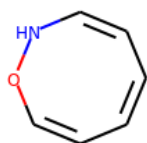

0.036553

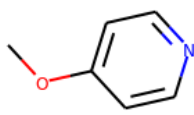

0.039949

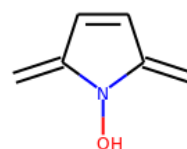

0.041059

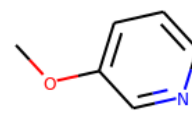

0.043486

|                             |        |                                           |        |
|-----------------------------|--------|-------------------------------------------|--------|
| Top predicted substructures | prob   |                                           |        |
| [#6H1]                      | 0.9998 | [cH]                                      | 0.9652 |
| [#6X3][#6X3]                | 0.9981 | [#7][#6][#6X3]                            | 0.9646 |
| [#6X3][#6X3][#6X3][#6X3]    | 0.9965 | [cX3H1]([cX3H1])[cX3H0]                   | 0.9628 |
| [cH][cH]                    | 0.9952 | [#6H1][#6H1]                              | 0.9453 |
| [cX3H1]([cX3H1])[cX3H1]     | 0.9715 | [#6X3H1][#6X3H0]                          | 0.9376 |
| best positives              | prob   | best negatives                            | prob   |
| [#6H1]                      | 0.9998 | [OX2H0]1[CX4H2][CX4H2][CX4H1][CX4H1]1     | 0.0    |
| [#6X3][#6X3]                | 0.9981 | [CX4H0]([NX3H1])([CX4H3])([CX4H2])[CX4H1] | 0.0    |
| [#6X3][#6X3][#6X3][#6X3]    | 0.9965 | [OX2H0][CX4H2][CX4H2][CX4H1][OX2H0]       | 0.0    |
| [cH][cH]                    | 0.9952 | [OX2H1][CX4H1][CX4H1]([CX4H1])[CX4H1]     | 0.0    |
| [cX3H1]([cX3H1])[cX3H1]     | 0.9715 | [CX4H0]([OX2H1])([CX4H3])([CX4H2])[CX4H1] | 0.0    |
| [cH]                        | 0.9652 | [CX4H0]([CX4H2])([CX4H2])([CX4H2])[CX4H1] | 0.0    |
| [#7][#6][#6X3]              | 0.9646 | [OX2H1][CX4H1]1[CX4H1][CX4H2][CX4H1]1     | 0.0    |
| [cX3H1]([cX3H1])[cX3H0]     | 0.9628 | [OX2H0][CX4H2][CX4H1]([CX4H1])[CX4H1]     | 0.0    |
| [#6H1][#6H1]                | 0.9453 | [OX2H0][CX4H2][CX2H0]#[CX2H1]             | 0.0    |
| [#6X3H1][#6X3H0]            | 0.9376 | [OX2H1][CX4H2][CX4H1]([CX4H2])[CX4H2]     | 0.0    |
| worst negatives             | prob   | worst positives                           | prob   |
| [#6X3][#7][#6X3]            | 0.7759 | [cX3H1]([cX3H0])[cX3H0]                   | 0.1057 |
| [#6X3][#7X3][#6X3]          | 0.6569 | [cX3H0][cX3H1][cX3H0][OX2H1]              | 0.1613 |
| [#6]1[#6][#6][#6][#7]1      | 0.3608 | [#6]1[#6][#6][#6][#6][#6]1                | 0.2952 |
| [#6]1[#6][#6][#6][#6][#7]1  | 0.3398 | [#7H2][#6H0]                              | 0.5162 |
| [#7H][#6X3H1]               | 0.2825 | [OX2H][cX3]:[c]                           | 0.5249 |
| [#7X3H1]                    | 0.2585 | [#6X3H1][#6X3H1][#6X3H0][#6X3H1]          | 0.5666 |
| [cX3H1]([nX3H1])[cX3H1]     | 0.1936 | [#8][#6][#6][#6X3]                        | 0.5754 |
| [cX3H1](=[cX3H1])[cX3H1]    | 0.1823 | [OX2H1]                                   | 0.6085 |
| [#6H1r5][#7]                | 0.1756 | [cH]cO                                    | 0.6246 |
| [#8][#6H1][#6H1]            | 0.1646 | [#7][#6H0][#6H1]                          | 0.6887 |

---

Example 35 true smiles: OCc1ccncc1 formula: C6H7NO  
Index of correct structure: 1 of 3639  
True structure loss: 0.019165  
True structure:

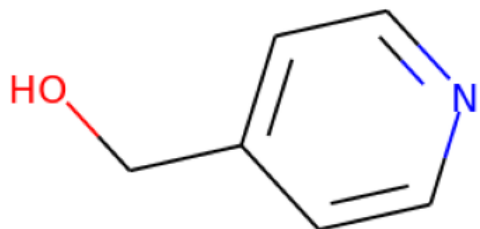

Experimental <sup>13</sup>C NMR (solvent: DMSO)

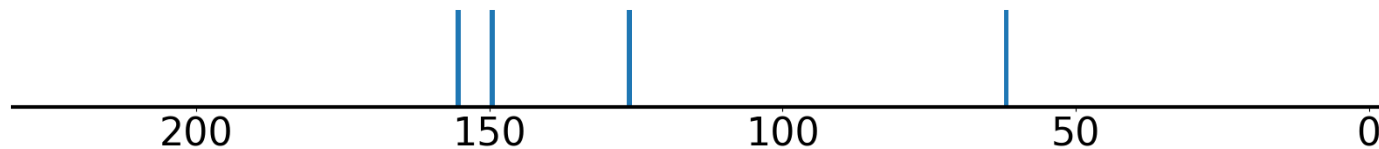

Experimental <sup>1</sup>H NMR (solvent: CDCl<sub>3</sub>)

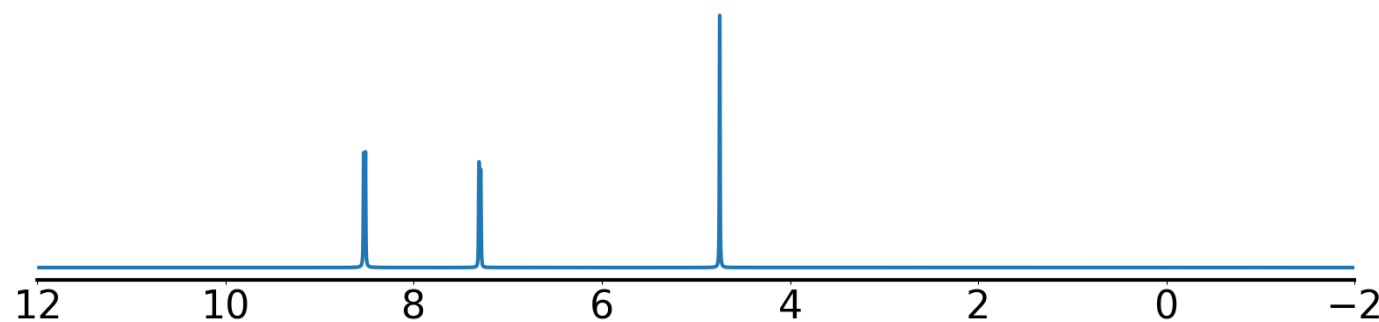

Top predicted structures (loss):

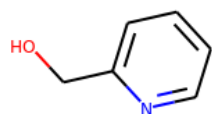

0.018144

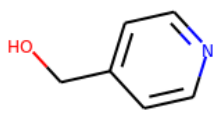

0.019165

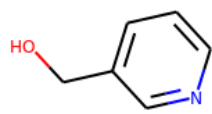

0.01946

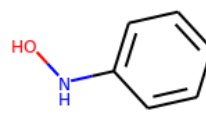

0.031282

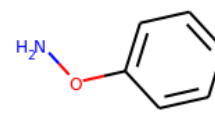

0.033728

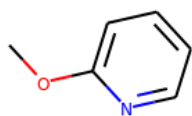

0.035811

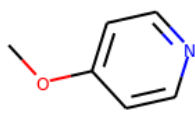

0.036833

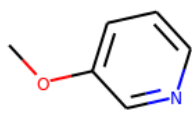

0.037128

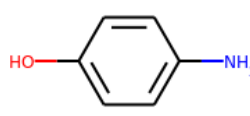

0.042436

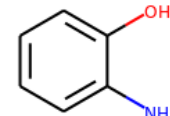

0.045147



| Top predicted substructures | prob        |                                           | prob        |
|-----------------------------|-------------|-------------------------------------------|-------------|
| [#6H1]                      | 0.9994      | [#6X3][#6H2][#8]                          | 0.8738      |
| [#6X3][#6X3]                | 0.9906      | [cH]                                      | 0.8691      |
| [CX4H2]([#6])[O]            | 0.99        | [#6H1][#6H1]                              | 0.8305      |
| [#7][#6][#6X3]              | 0.926       | [#6X3H1][#6X3H0]                          | 0.7402      |
| [cH][cH]                    | 0.8998      | [cX3H1]([cX3H1])[cX3H1]                   | 0.7399      |
| <b>best positives</b>       | <b>prob</b> | <b>best negatives</b>                     | <b>prob</b> |
| [#6H1]                      | 0.9994      | [OX1H0]=[CX3H0]1[CX4H1][CX4H1][CX4H2]1    | 0.0         |
| [#6X3][#6X3]                | 0.9906      | [CX4H0]([OX2H0])([CX4H3])([CX4H2])[CX4H1] | 0.0         |
| [CX4H2]([#6])[O]            | 0.99        | [CX4H0]1[CX4H2][CX4H2][CX4H1]1            | 0.0         |
| [#7][#6][#6X3]              | 0.926       | [CX3H0]([OX1H0])([CX4H1])[CX4H0]          | 0.0         |
| [cH][cH]                    | 0.8998      | [CX3H0]([OX1H0])([CX4H3])[CX4H0]          | 0.0         |
| [#6X3][#6H2][#8]            | 0.8738      | [#8][#6H1][#6H2][#6H1]=[#8]               | 0.0         |
| [cH]                        | 0.8691      | [OX2H0]1[CX4H2][CX4H2][CX4H1][CX4H1]1     | 0.0         |
| [#6H1][#6H1]                | 0.8305      | [CX4H1]([CX4H3])([CX4H2])[CX4H0]          | 0.0         |
| [#6X3H1][#6X3H0]            | 0.7402      | [CX4H0]([NX3H1])([CX4H3])([CX4H2])[CX4H1] | 0.0         |
| [#8][#6][#6][#6X3]          | 0.7284      | [CX4H0]([OX2H1])([CX4H3])([CX4H2])[CX4H1] | 0.0         |
| <b>worst negatives</b>      | <b>prob</b> | <b>worst positives</b>                    | <b>prob</b> |
| [cX3H1]([cX3H1])[cX3H1]     | 0.7399      | [#6H1][#7][#6H1]                          | 0.1156      |
| O[CX4H2][CX3H1]             | 0.4765      | [#6X3][#7][#6X3]                          | 0.3768      |
| [CX4H2]([OX2H0])[CX3H1]     | 0.3367      | [#6X3H1][#6X3H1][#6X3H0][#6X3H1]          | 0.3993      |
| [#8][#6][#6]=[#6X3]         | 0.2925      | [OX2H1][CX4H2][#6X3H0]                    | 0.4618      |
| [CX4H2][CX3H]               | 0.2904      | [#6]1[#6][#6][#6][#6][#7]1                | 0.497       |
| [#7][#6X3H0][#6X3H1]        | 0.2646      | [#7][#6][#6][#6X3]                        | 0.5777      |
| [#8][#6H0][#6H1]            | 0.2407      | [cX3H1]([cX3H1])[cX3H0]                   | 0.644       |
| [#6]1[#6][#6][#6][#6][#6]1  | 0.2294      | [cX3H1]([nX2H0])[cX3H1]                   | 0.6878      |
| [#7]=[#6][#6]=[#6X3]        | 0.2232      | [OX2H1]                                   | 0.6962      |
| [#6H1r5][#7]                | 0.2144      | [#6X3][#6X3][#6X3][#6X3]                  | 0.7101      |

---

Example 36 true smiles: COC(=O)c1ccco1 formula: C6H6O3  
 Index of correct structure: 4 of 3580  
 True structure loss: 0.025458  
 True structure:

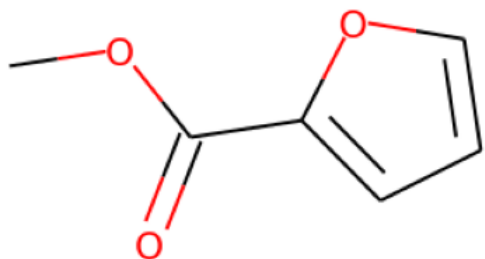

Experimental <sup>13</sup>C NMR (solvent: Acetone-d<sub>6</sub>)

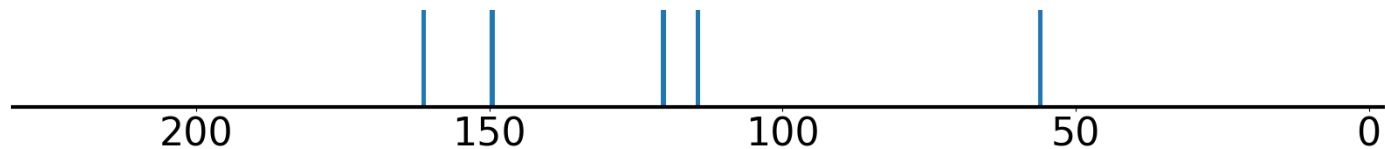

Experimental <sup>1</sup>H NMR (solvent: D<sub>2</sub>O)

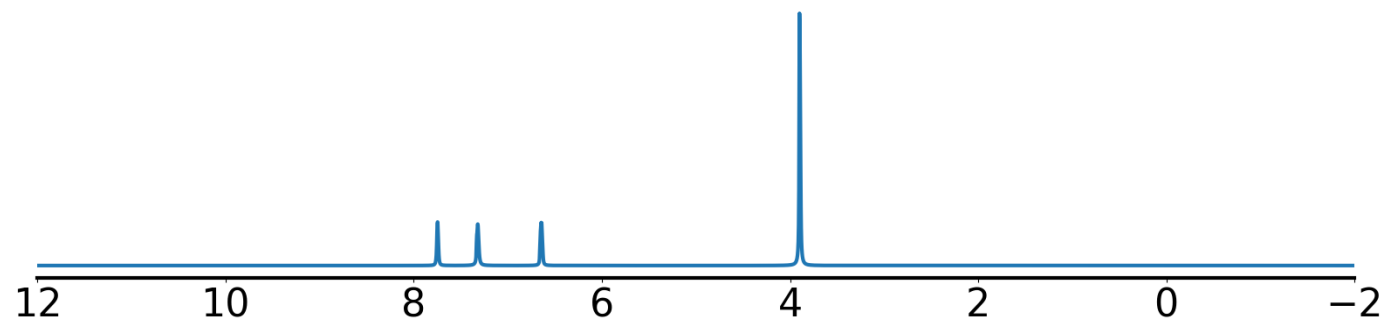

Top predicted structures (loss):

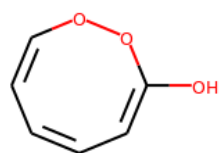

0.016006

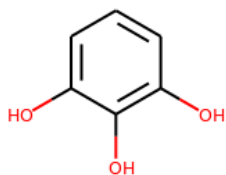

0.018703

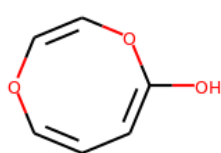

0.019293

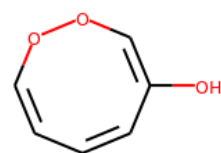

0.022271

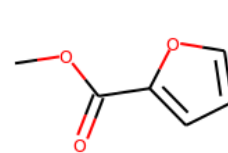

0.025458

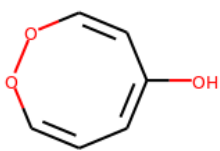

0.025614

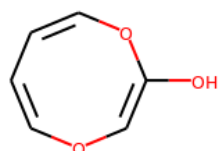

0.028323

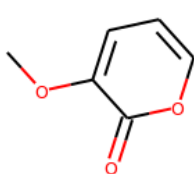

0.02932

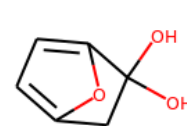

0.030657

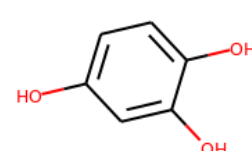

0.031311

|                                  |        |                                           |        |
|----------------------------------|--------|-------------------------------------------|--------|
| Top predicted substructures      | prob   |                                           |        |
| [#6H1]                           | 0.9998 | [cX3H1]([cX3H1])[cX3H0]                   | 0.961  |
| [#6X3][#6X3]                     | 0.9977 | [#6X3H1][#6X3H0]                          | 0.9511 |
| [cH][cH]                         | 0.987  | [#6X3][#6X3][#6X3][#6X3]                  | 0.9499 |
| [#8][#6][#6][#6X3]               | 0.9851 | [#6H1][#6H1]                              | 0.9261 |
| [cH]                             | 0.9843 | [#8][#6H0][#6H1]                          | 0.9149 |
| best positives                   | prob   | best negatives                            | prob   |
| [#6H1]                           | 0.9998 | [CX4H0]([NX3H1])([CX4H3])([CX4H2])[CX4H1] | 0.0    |
| [#6X3][#6X3]                     | 0.9977 | [CX4H1]([NX3H2])([CX4H2])[CX4H0]          | 0.0    |
| [cH][cH]                         | 0.987  | [CX4H0]([CX4H3])([CX4H2])([CX4H2])[CX3H0] | 0.0    |
| [#8][#6][#6][#6X3]               | 0.9851 | [#6H3][#6H1][#7][#7]                      | 0.0    |
| [cH]                             | 0.9843 | [#6H3][#6H0][#7][#6H3]                    | 0.0    |
| [cX3H1]([cX3H1])[cX3H0]          | 0.961  | [CX3H0](=[NX2H0])([NX3H0])[CX4H2]         | 0.0    |
| [#6X3H1][#6X3H0]                 | 0.9511 | [CX4H2]([NX3H0])[CX4H3]                   | 0.0    |
| [#6X3][#6X3][#6X3][#6X3]         | 0.9499 | [CX4H1]([NX3H2])([CX4H3])[CX4H1]          | 0.0    |
| [#6H1][#6H1]                     | 0.9261 | [CX4H1]([NX3H0])([CX4H2])[CX4H0]          | 0.0    |
| [#8][#6H0][#6H1]                 | 0.9149 | [CX4H0]([NX3H1])([CX4H2])([CX4H2])[CX4H1] | 0.0    |
| worst negatives                  | prob   | worst positives                           | prob   |
| [OX2H1]                          | 0.8342 | [#8][#6][#6]=[#8]                         | 0.0291 |
| [cH]cO                           | 0.5813 | [OX1H0]=[CX3H0][OX2H0][CX4H3]             | 0.0871 |
| [#8]=[#6][#6H1][#6H1]            | 0.4873 | [CX4H3]                                   | 0.1211 |
| [OX2H][cX3]:[c]                  | 0.4661 | o[cH]                                     | 0.2081 |
| [#6X3H1][#6X3H1][#6X3H0][#6X3H1] | 0.2416 | O=[#6][#6][#6X3]                          | 0.2261 |
| [#8][#6][#6][#6][#6][#8]         | 0.2343 | [#8][#6H][#6X3][#6X3H]                    | 0.2646 |
| [CX4H2]([#6])[O]                 | 0.2048 | [CX3]([OX1])O                             | 0.4402 |
| [CHX3]=[CHX3]                    | 0.1719 | [CX4H3][OX2H0]                            | 0.4662 |
| [cX3H0]([cX3H1])([cX3H0])[OX2H1] | 0.1673 | [cX3H1]([oX2H0])[cX3H1]                   | 0.5109 |
| O=[cX3]                          | 0.1461 | [#8][#6H1][#6H1]                          | 0.5917 |

---

Example 37 true smiles: CC(CC(=O)O)C(=O)O formula: C5H8O4  
 Index of correct structure: 0 of 3240  
 True structure loss: 0.0312  
 True structure:

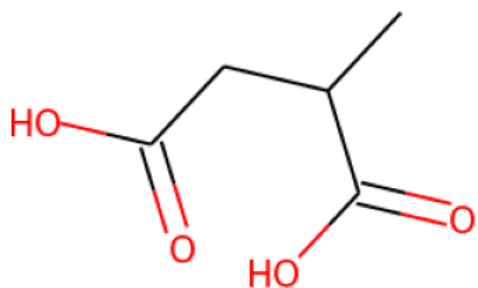

Experimental <sup>13</sup>C NMR (solvent: DMSO)

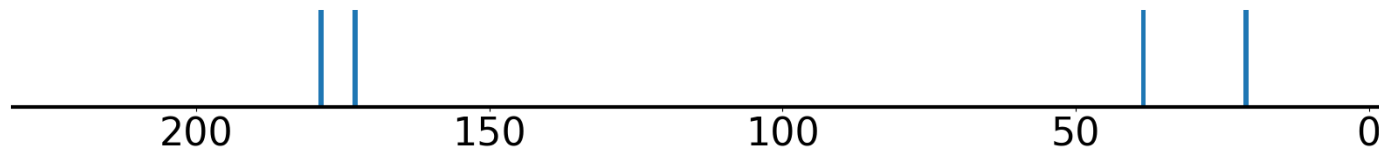

Experimental <sup>1</sup>H NMR (solvent: D2O)

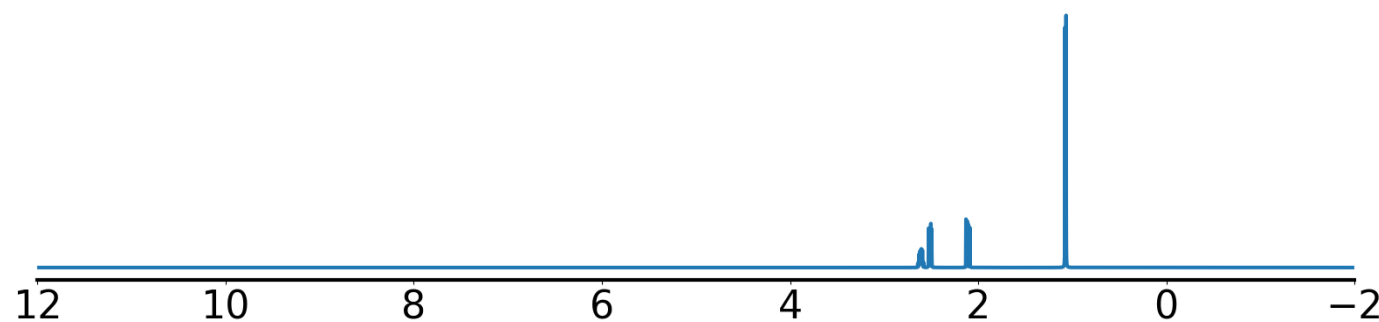

Top predicted structures (loss):

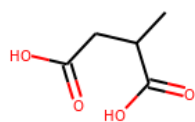

0.0312

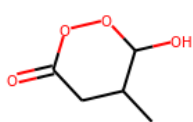

0.04632

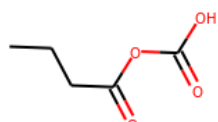

0.047054

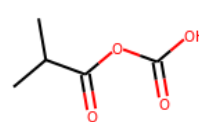

0.052269

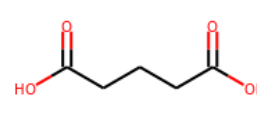

0.053122

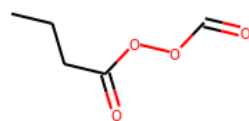

0.062345

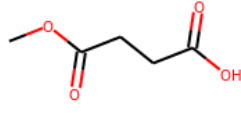

0.068231

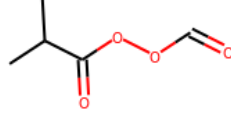

0.069875

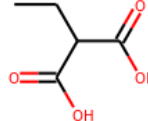

0.070738

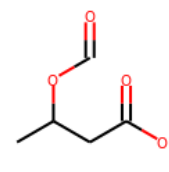

0.071324

|                                   |        |                                        |        |
|-----------------------------------|--------|----------------------------------------|--------|
| Top predicted substructures       | prob   |                                        |        |
| [#8]=[#6][#8]                     | 1.0    | [#6H3][#6][#6]                         | 0.9963 |
| [CX3](=[OX1])O                    | 1.0    | [OX1H0]=[CX3H0]([#8])[CX4H2]           | 0.9876 |
| [CX4H3]                           | 0.9998 | [OX2H1]                                | 0.9789 |
| [CX3](=[OX1])C                    | 0.9998 | [CX3](=O)[OX2H1]                       | 0.9563 |
| [CX4H2]([#6])[#6]                 | 0.9978 | [CX4H2]([CX4H1])[CX3H0]                | 0.9495 |
| best positives                    | prob   | best negatives                         | prob   |
| [#8]=[#6][#8]                     | 1.0    | CC#CCC#C                               | 0.0    |
| [CX3](=[OX1])O                    | 1.0    | [#6X2][#6H1][#6X2]                     | 0.0    |
| [CX4H3]                           | 0.9998 | C=CC=CC#C                              | 0.0    |
| [CX3](=[OX1])C                    | 0.9998 | [CX2H0](#[CX2H1])[CX4H0]               | 0.0    |
| [CX4H2]([#6])[#6]                 | 0.9978 | [CX2H1]#[CX2H0][CX3H1]=[CX3H0]         | 0.0    |
| [#6H3][#6][#6]                    | 0.9963 | CCC=CC#C                               | 0.0    |
| [OX1H0]=[CX3H0]([#8])[CX4H2]      | 0.9876 | [CX2H0](#[CX2H0])[CX2H0]               | 0.0    |
| [OX2H1]                           | 0.9789 | CCC#CCC                                | 0.0    |
| [CX3](=O)[OX2H1]                  | 0.9563 | CC#CCC=C                               | 0.0    |
| [CX4H2]([CX4H1])[CX3H0]           | 0.9495 | [CX2H0](#[CX2H0])[CX3H0]               | 0.0    |
| worst negatives                   | prob   | worst positives                        | prob   |
| [OX2H0][CX3H0][CX4H2]             | 0.6583 | [OX1H0]=[CX3H0][CX4H1]([CX4H3])[CX4H2] | 0.005  |
| [CX3H0](=[OX1H0])([OX2H0])[CX4H2] | 0.434  | [CX4H1]([CX4H3])([CX4H2])[CX3H0]       | 0.0416 |
| [#8X2H0][#6X3H0][CX4H2][CX4H1]    | 0.3797 | [#8][#6][#6][#6][#6][#8]               | 0.0517 |
| [CX3H0](=[OX1H0])([OX2H1])[CX3H0] | 0.3061 | [#8]=[#6][#6][#6][#6]=[#8]             | 0.1725 |
| [CX3H0](=[OX1H0])([OX2H0])[CX4H3] | 0.2867 | O=[CX3][CX4H]                          | 0.1926 |
| O=[CX3H0][CX4H2][CX4H2]           | 0.2339 | [#8]=[#6H0][#6H1]                      | 0.2157 |
| [#6H3][#6H1r5]                    | 0.1782 | [#6H3][#6][#6X3]                       | 0.2451 |
| [CX4H2]([CX4H2])[CX3H0]           | 0.1255 | [#8][#6][#6][#6][#6]=[#8]              | 0.3035 |
| [CH3][#6][#8]                     | 0.1094 | [CH3]CC[OH]                            | 0.3227 |
| [CHX4]([CH3X4])[CH3X4]            | 0.1019 | [CX3H0](=[OX1H0])([OX2H1])[CX4H1]      | 0.503  |

---

Example 38 true smiles: CC(C)(C(=O)O)C(=O)O formula: C5H8O4  
Index of correct structure: 1 of 3240  
True structure loss: 0.026307  
True structure:

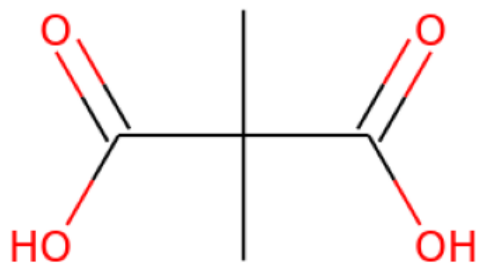

Experimental <sup>13</sup>C NMR (solvent: D2O)

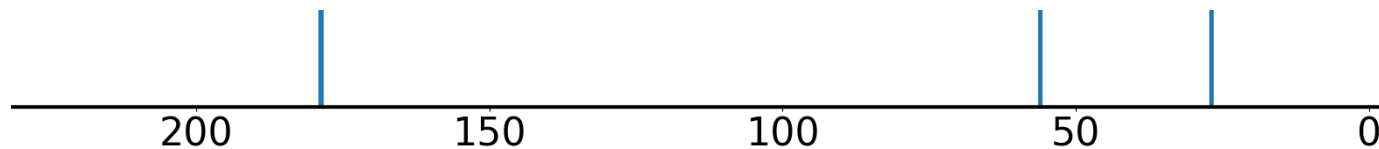

Experimental <sup>1</sup>H NMR (solvent: D2O)

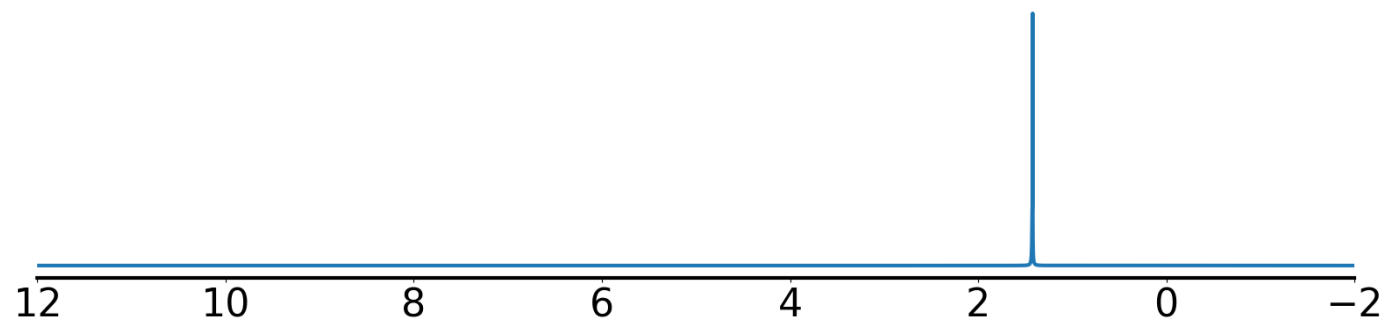

Top predicted structures (loss):

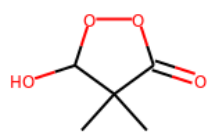

0.024814

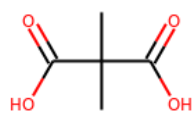

0.026307

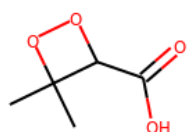

0.02928

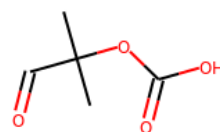

0.032178

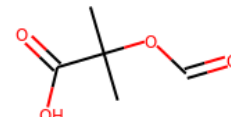

0.034096

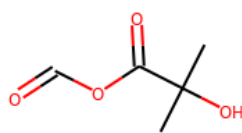

0.038497

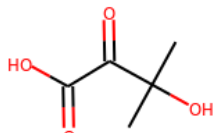

0.041365

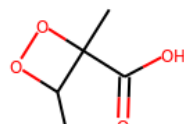

0.043049

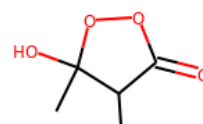

0.04502

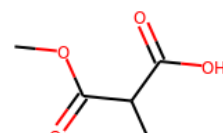

0.045022

|                                   |        |                                   |        |
|-----------------------------------|--------|-----------------------------------|--------|
| Top predicted substructures       | prob   |                                   |        |
| [CX3](=[OX1])C                    | 0.999  | [CX4H3][CX4H0]                    | 0.9834 |
| [#8]=[#6][#8]                     | 0.9989 | [#6H3][#6H0]                      | 0.9703 |
| [CX3](=[OX1])O                    | 0.9981 | [OX2H1]                           | 0.9652 |
| [CX4H3]                           | 0.996  | [CX3](=O)[OX2H1]                  | 0.8972 |
| [#6H3][#6][#6]                    | 0.9929 | [CX4H3][#6]                       | 0.8477 |
| best positives                    | prob   | best negatives                    | prob   |
| [CX3](=[OX1])C                    | 0.999  | [CX2H1]#[CX2H0][CX3H1]=[CX3H0]    | 0.0    |
| [#8]=[#6][#8]                     | 0.9989 | C=CC=CC#C                         | 0.0    |
| [CX3](=[OX1])O                    | 0.9981 | [CX3H0](=[CX3H2])([CX4H2])[CX4H2] | 0.0    |
| [CX4H3]                           | 0.996  | CC=CC#CC                          | 0.0    |
| [#6H3][#6][#6]                    | 0.9929 | CC=CCC#C                          | 0.0    |
| [CX4H3][CX4H0]                    | 0.9834 | [CX3H0](=[CX3H1])([CX4H2])[CX2H0] | 0.0    |
| [#6H3][#6H0]                      | 0.9703 | [CX3H0](=[CX3H1])([OX2H0])[CX2H0] | 0.0    |
| [OX2H1]                           | 0.9652 | CCC#CC=C                          | 0.0    |
| [CX3](=O)[OX2H1]                  | 0.8972 | [CX3H0](=[CX3H1])([CX4H1])[CX2H0] | 0.0    |
| [CX4H3][#6]                       | 0.8477 | [CX3H0](=[CX3H2])([CX4H2])[CX4H1] | 0.0    |
| worst negatives                   | prob   | worst positives                   | prob   |
| [CX4H3][CX4]O                     | 0.8176 | [#8]=[#6][#6H0][#6]=[#8]          | 0.0034 |
| [CX3H0](=[OX1H0])([OX2H1])[CX4H1] | 0.7283 | O=[#6][#6][#6X3]                  | 0.0888 |
| [CH3][#6][#8]                     | 0.6137 | [CH3]CC[OH]                       | 0.3323 |
| [#8][#6H0][#6H1]                  | 0.5495 | [#8][#6][#6][#6X3]                | 0.4338 |
| [#6H1]                            | 0.5052 | [#6H3][#6][#6X3]                  | 0.5108 |
| [CX3H0](=[OX1H0])([OX2H0])[CX4H0] | 0.4581 | [OX1H0]=[CX3H0][CX4H0][CX4H3]     | 0.7075 |
| [#8][#6][#6]=[#8]                 | 0.4316 | [CX4H3][CX4H0][CX4H3]             | 0.7762 |
| [CX4H2]CC=O                       | 0.4033 | [CX4H3][#6]                       | 0.8477 |
| [#8]=[#6H0][#6H1]                 | 0.4007 | [CX3](=O)[OX2H1]                  | 0.8972 |
| [#8][#6][#6][#8]                  | 0.3391 | [OX2H1]                           | 0.9652 |

---

Example 39 true smiles: CCCCCC(=O)O formula: C7H14O2  
Index of correct structure: 0 of 3028  
True structure loss: 0.008652  
True structure:

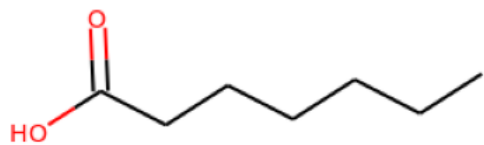

Experimental <sup>13</sup>C NMR (solvent: CDCl<sub>3</sub>)

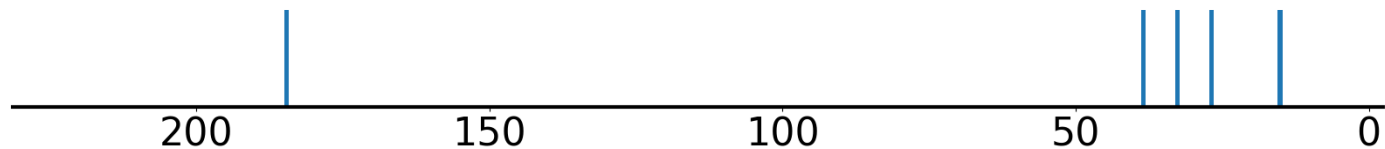

Experimental <sup>1</sup>H NMR (solvent: d<sub>2</sub>o)

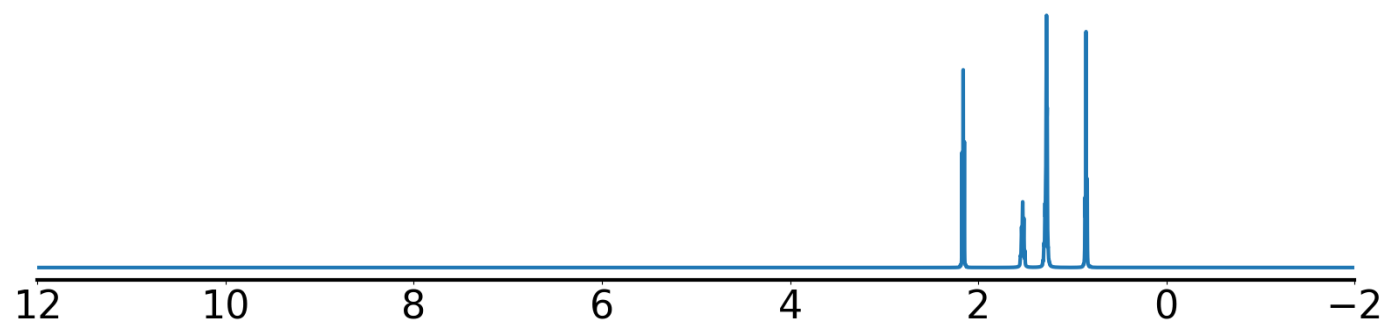

Top predicted structures (loss):

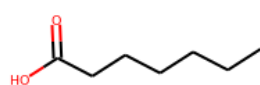

0.008652

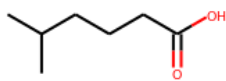

0.02813

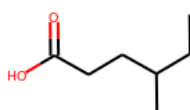

0.030004

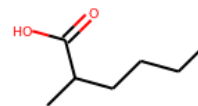

0.041653

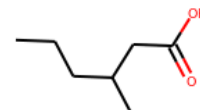

0.043735

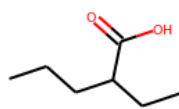

0.044891

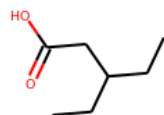

0.046682

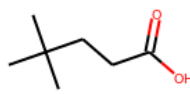

0.052074

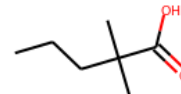

0.053962

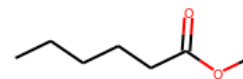

0.055838



|                                   |        |                                |        |
|-----------------------------------|--------|--------------------------------|--------|
| Top predicted substructures       | prob   |                                |        |
| [#6H3][#6][#6]                    | 0.9999 | [CX3](=[OX1])C                 | 0.9989 |
| [CX4H2]([#6])[#6]                 | 0.9995 | [CX4H3][CX4H2]                 | 0.9968 |
| [CX4H3][#6]                       | 0.9994 | [#8]=[#6][#8]                  | 0.9863 |
| [CX4H3]                           | 0.9992 | [CX3](=[OX1])O                 | 0.9851 |
| [CX3](=O)[OX2H1]                  | 0.999  | [OX2H1]                        | 0.9677 |
| best positives                    | prob   | best negatives                 | prob   |
| [#6H3][#6][#6]                    | 0.9999 | [CX2H0](#[CX2H1])[CX3H0]       | 0.0    |
| [CX4H2]([#6])[#6]                 | 0.9995 | CCC#CC#C                       | 0.0    |
| [CX4H3][#6]                       | 0.9994 | [CX2H0](#[CX2H1])[CX4H0]       | 0.0    |
| [CX4H3]                           | 0.9992 | [CX2H1]#[CX2H0][CX3H1]=[CX3H0] | 0.0    |
| [CX3](=O)[OX2H1]                  | 0.999  | CCC=CC#C                       | 0.0    |
| [CX3](=[OX1])C                    | 0.9989 | [#6X2][#6H1][#6X2]             | 0.0    |
| [CX4H3][CX4H2]                    | 0.9968 | C=CC=CC#C                      | 0.0    |
| [#8]=[#6][#8]                     | 0.9863 | [CX2H0](#[CX2H0])[CX2H0]       | 0.0    |
| [CX3](=[OX1])O                    | 0.9851 | CC=CC#CC                       | 0.0    |
| [OX2H1]                           | 0.9677 | CC#CCC#C                       | 0.0    |
| worst negatives                   | prob   | worst positives                | prob   |
| [#6H1]                            | 0.4501 | [OX1H0]=[CX3H0]([#8])[CX4H2]   | 0.5721 |
| [#6H1][#6H2]                      | 0.4491 | [CX4H2][CX3]=O                 | 0.6044 |
| [CX3H0](=[OX1H0])([OX2H1])[CX4H1] | 0.3637 | CCCCC                          | 0.6456 |
| [CX4H3][CX4H1]                    | 0.262  | O=[CX3H0][CX4H2][CX4H2]        | 0.6516 |
| [CHX4]([CH3X4])[CH2X4]            | 0.1828 | [#8][#6][#6H2]                 | 0.688  |
| [#6H3][#6H0]                      | 0.1589 | [CX4H2]([CX4H2])[CX3H0]        | 0.7089 |
| [CX4H2]([CX4H2])[CX4H1]           | 0.1484 | [CX4H2]CC=O                    | 0.7683 |
| [#8]=[#6H0][#6H1]                 | 0.1461 | [CX4H2]([CX4H3])[CX4H2]        | 0.7715 |
| [CX4H1]([CX4H3])([CX4H3])[CX4H2]  | 0.1437 | OCC[CH2]                       | 0.7969 |
| [#6H3][#6][#6X3]                  | 0.1392 | [CX4H2]([CX4H2])[CX4H2]        | 0.817  |

---

Example 40 true smiles: CC1(C)OCC(CO)O1 formula: C6H12O3  
 Index of correct structure: 0 of 3020  
 True structure loss: 0.035402  
 True structure:

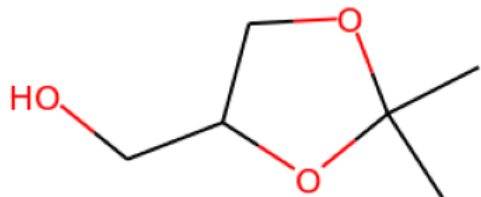

Experimental <sup>13</sup>C NMR (solvent: CDCl<sub>3</sub>)

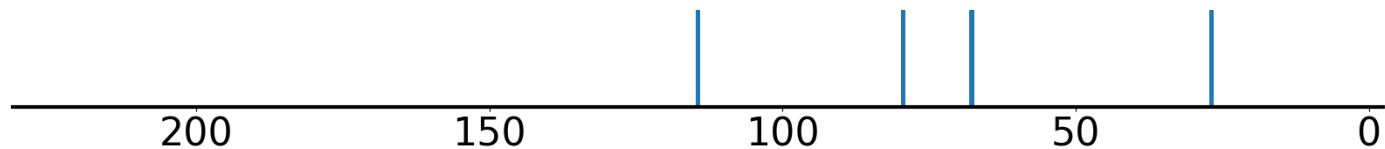

Experimental <sup>1</sup>H NMR (solvent: CDCl<sub>3</sub>)

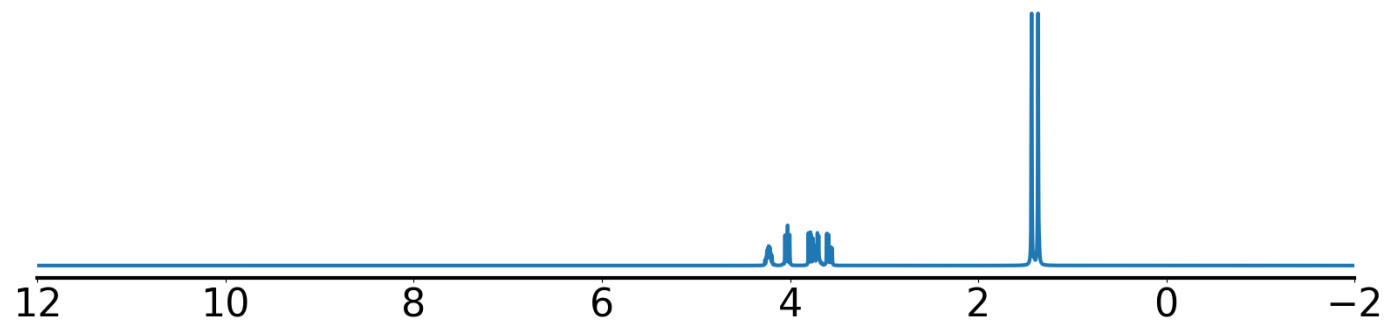

Top predicted structures (loss):

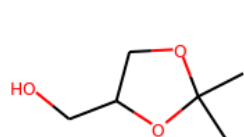

0.035402

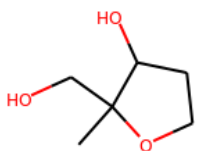

0.036146

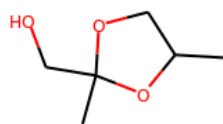

0.039829

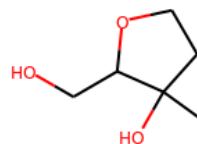

0.040292

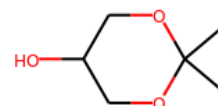

0.041119

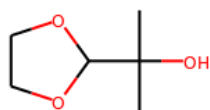

0.041192

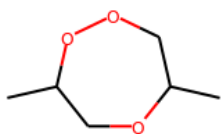

0.041906

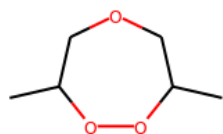

0.042918

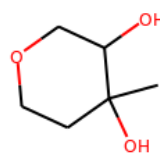

0.043665

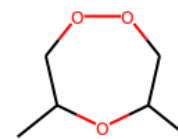

0.044431

|                             |        |                                   |        |
|-----------------------------|--------|-----------------------------------|--------|
| Top predicted substructures | prob   |                                   |        |
| [CX4H2]([#6])[O]            | 0.9999 | [#8][#6][#6H2][#8]                | 0.9943 |
| [CX4H3]                     | 0.9999 | [#8][#6][#6][#8]                  | 0.9897 |
| [CX4H3][CX4]O               | 0.9997 | [CX4H3][#6]                       | 0.9875 |
| [#6H3][#6][#6]              | 0.9988 | OCC[CH2]                          | 0.9845 |
| [#8][#6][#6H2]              | 0.9947 | [#6H1]                            | 0.9823 |
| best positives              | prob   | best negatives                    | prob   |
| [CX4H2]([#6])[O]            | 0.9999 | [CX2H0](#[CX2H1])[CX3H0]          | 0.0    |
| [CX4H3]                     | 0.9999 | C=CC=CC#C                         | 0.0    |
| [CX4H3][CX4]O               | 0.9997 | [#7][#6]=[#6][#6][#6]=[#7]        | 0.0    |
| [#6H3][#6][#6]              | 0.9988 | [CX2H1]#[CX2H0][CX3H1]=[CX3H0]    | 0.0    |
| [#8][#6][#6H2]              | 0.9947 | CC#CCC#C                          | 0.0    |
| [#8][#6][#6H2][#8]          | 0.9943 | [CX3H0][CX3H1]=[CX3H1][CX3H0]     | 0.0    |
| [#8][#6][#6][#8]            | 0.9897 | [CX3H0](=[CX3H1])([CX4H2])[CX2H0] | 0.0    |
| [CX4H3][#6]                 | 0.9875 | [CX2H0](#[CX2H0])[CX2H0]          | 0.0    |
| OCC[CH2]                    | 0.9845 | [CX3H0](=[NX2H1])([NX3H1])[CX4H1] | 0.0    |
| [#6H1]                      | 0.9823 | CCC#CC#C                          | 0.0    |
| worst negatives             | prob   | worst positives                   | prob   |
| [CX4H2][CX4H2]              | 0.8369 | [CX4H3][CX4H0][CX4H3]             | 0.0044 |
| [CH2X4](O)[CX4H2]           | 0.6708 | [CX4H3][CX4H0]([CX4H3])[OX2H0]    | 0.0161 |
| [#8][#6H0][#6H1]            | 0.6319 | [#6H0]([#6H3])([#6H3])[#8]        | 0.032  |
| [#6X4H3][#6][#8H]           | 0.5238 | [#6H1]([#6H2])[#6H2]              | 0.1036 |
| [CX4H2]([OX2H0])[CX4H2]     | 0.5047 | [OX2H0][CX4H2][CX4H1][CX4H2]      | 0.1992 |
| [OH][CX4H]                  | 0.4017 | [CX4H1]([OX2H0])([CX4H2])[CX4H2]  | 0.2242 |
| C1OCC1                      | 0.3782 | [CX4H2]([OX2H1])[CX4H1]           | 0.3112 |
| [#8][#6][#6][#6][#6][#8]    | 0.3387 | [CX4H2]([OX2H0])[CX4H1]           | 0.4405 |
| [OX2H0][CX4H2][#6H0]        | 0.3207 | [#8H][#6H2][#6H1]                 | 0.4854 |
| [#6X4H2][#6H1][#8H]         | 0.3174 | [#6]1[#8][#6][#8][#6]1            | 0.6221 |

---

Example 41 true smiles: NC(CCO)C(=O)O formula: C4H9NO3  
 Index of correct structure: 0 of 2840  
 True structure loss: 0.01536  
 True structure:

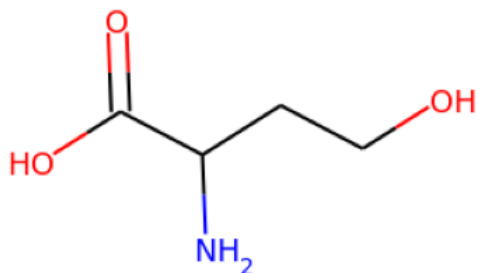

Experimental <sup>13</sup>C NMR (solvent: D2O)

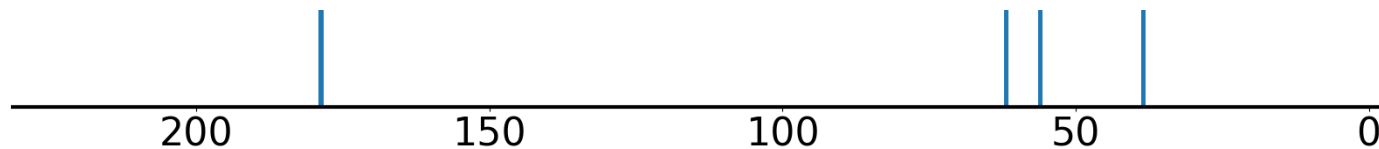

Experimental <sup>1</sup>H NMR (solvent: D2O)

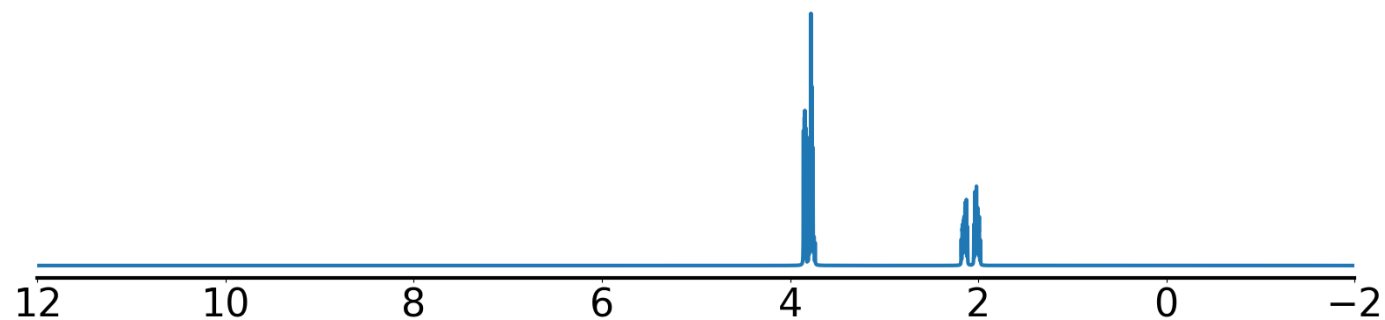

Top predicted structures (loss):

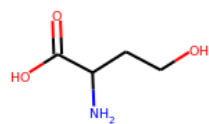

0.01536

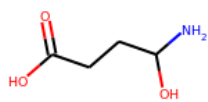

0.049893

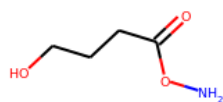

0.054603

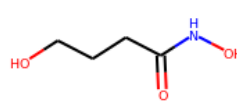

0.055064

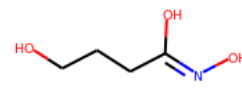

0.055355

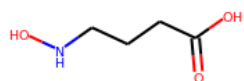

0.055844

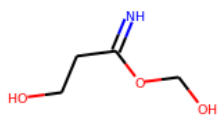

0.056444

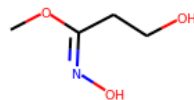

0.056502

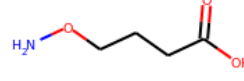

0.057623

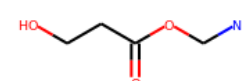

0.057921

|                                   |        |                                   |        |
|-----------------------------------|--------|-----------------------------------|--------|
| Top predicted substructures       | prob   |                                   |        |
| [CX3](=[OX1])C                    | 0.9949 | [CX3](=O)[OX2H1]                  | 0.9268 |
| [CX4H2]([#6])[#6]                 | 0.9946 | [CX4H2]([OX2H1])[CX4H2]           | 0.9111 |
| [OX2H1]                           | 0.9909 | [#8]=[#6H0][#6H1]                 | 0.9006 |
| [#8]=[#6][#8]                     | 0.9735 | [#7X3H2]                          | 0.8953 |
| [CX3](=[OX1])O                    | 0.9401 | [#8][#6][#6H2]                    | 0.8872 |
| best positives                    | prob   | best negatives                    | prob   |
| [CX3](=[OX1])C                    | 0.9949 | [CX2H1]#[CX2H0][CX3H1]=[CX3H0]    | 0.0    |
| [CX4H2]([#6])[#6]                 | 0.9946 | CC=CCC#C                          | 0.0    |
| [OX2H1]                           | 0.9909 | [CX2H0](#[CX2H1])[CX4H2]          | 0.0    |
| [#8]=[#6][#8]                     | 0.9735 | CC=CC#CC                          | 0.0    |
| [CX3](=[OX1])O                    | 0.9401 | CCC#CC#C                          | 0.0    |
| [CX3](=O)[OX2H1]                  | 0.9268 | CC#CCC=C                          | 0.0    |
| [CX4H2]([OX2H1])[CX4H2]           | 0.9111 | [#6X2][#6H1][#6X2]                | 0.0    |
| [#8]=[#6H0][#6H1]                 | 0.9006 | [CX2H0](#[CX2H1])[CX4H1]          | 0.0    |
| [#7X3H2]                          | 0.8953 | [#6X3][#6][#6][#6H3]              | 0.0    |
| [#8][#6][#6H2]                    | 0.8872 | [CX2H0](#[CX2H0])[CX3H0]          | 0.0    |
| worst negatives                   | prob   | worst positives                   | prob   |
| [CX4H1]([NX3H1])([CX4H2])[CX3H0]  | 0.4249 | [#8][#6H0][#6H1]                  | 0.1975 |
| [CX4H2][CX3]=O                    | 0.3888 | [#8][#6][#6][#6][#6]=[#8]         | 0.2456 |
| [#8][#6][#6][#6X3]                | 0.314  | [#8][#6][#6][#6][#6][#8]          | 0.2613 |
| [CX4H2]([CX4H2])[CX3H0]           | 0.2941 | [#6H1][#6H2]                      | 0.5729 |
| [#7H2][#6H0]                      | 0.2695 | OCC[CH2]                          | 0.6983 |
| [#7X3H1]                          | 0.2365 | [CX4H1]([NX3H2])([CX4H2])[CX3H0]  | 0.7064 |
| O=[CX3H0][CX4H2][CX4H2]           | 0.2267 | [#6H1]                            | 0.761  |
| [CX3H0](=[OX1H0])([OX2H1])[CX4H2] | 0.2218 | [CX3H0](=[OX1H0])([OX2H1])[CX4H1] | 0.7876 |
| [OX1H0]=[CX3H0]([#8])[CX4H2]      | 0.1981 | [#7][#6][#6X3]                    | 0.7902 |
| [#7][#6H1][#6H2r5]                | 0.1873 | O=[CX3][CX4H]                     | 0.7941 |

---

Example 42 true smiles: O=C(O)c1cccc[nH]1 formula: C5H5NO2  
 Index of correct structure: 1 of 2827  
 True structure loss: 0.023863  
 True structure:

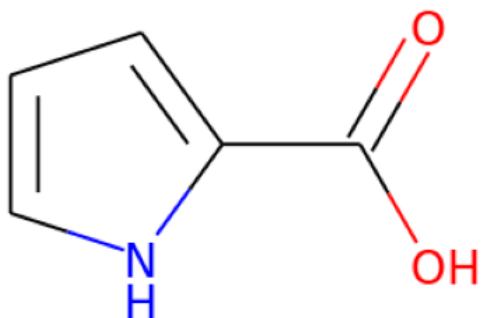

Experimental <sup>13</sup>C NMR (solvent: CD3OD)

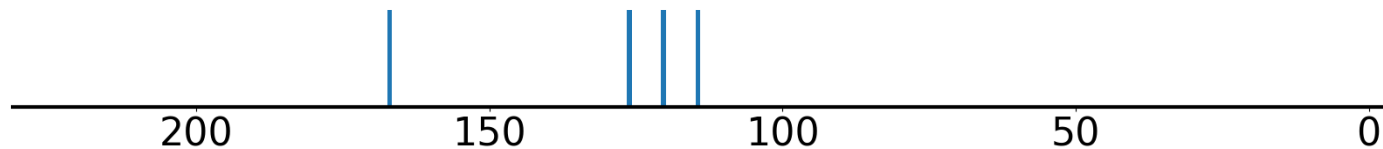

Experimental <sup>1</sup>H NMR (solvent: MeOD)

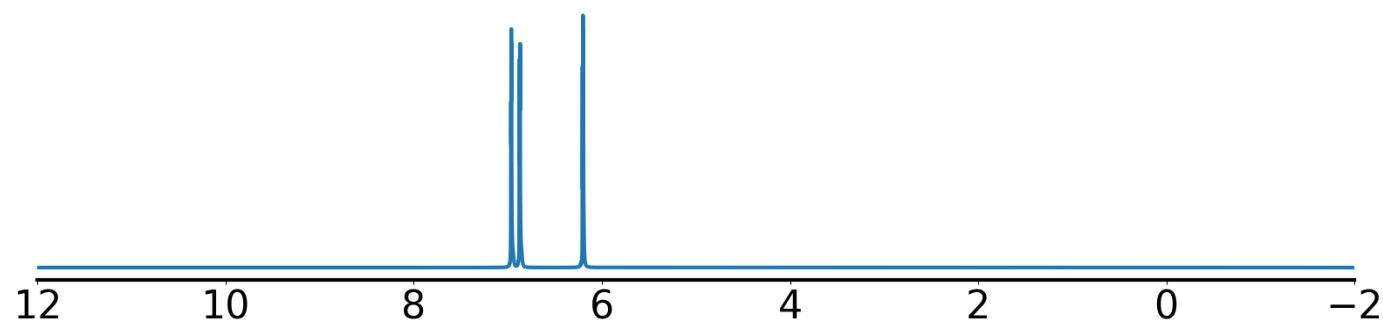

Top predicted structures (loss):

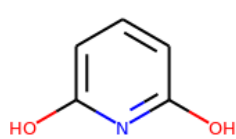

0.018317

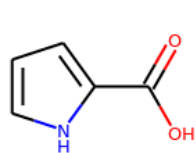

0.023863

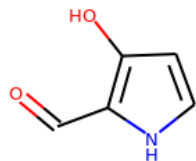

0.025028

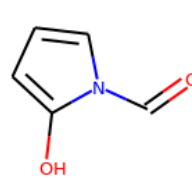

0.02595

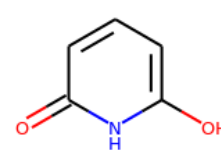

0.028001

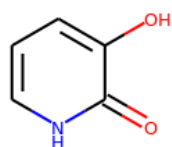

0.028305

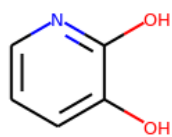

0.029159

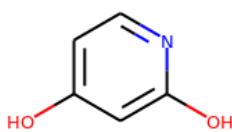

0.029949

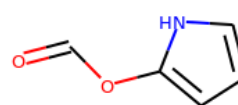

0.030875

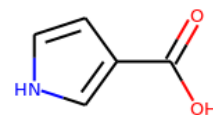

0.031187

| Top predicted substructures      | prob        |                                           |             |
|----------------------------------|-------------|-------------------------------------------|-------------|
| [#6H1]                           | 0.9979      | [cX3H1]([cX3H1])[cX3H0]                   | 0.9565      |
| [cH][cH]                         | 0.9929      | [#6X3H1][#6X3H0]                          | 0.9508      |
| [#6X3][#6X3]                     | 0.9919      | [#7][#6][#6X3]                            | 0.9211      |
| [#6X3][#6X3][#6X3][#6X3]         | 0.9906      | [#6H1][#6H1]                              | 0.9082      |
| [cH]                             | 0.9757      | [#6X3][#7][#6X3]                          | 0.8886      |
| <b>best positives</b>            | <b>prob</b> | <b>best negatives</b>                     | <b>prob</b> |
| [#6H1]                           | 0.9979      | [CX4H0]([CX4H3])([CX4H2])([CX4H2])[CX3H0] | 0.0         |
| [cH][cH]                         | 0.9929      | [OX2H0]1[CX4H2][CX4H2][CX4H1][CX4H1]1     | 0.0         |
| [#6X3][#6X3]                     | 0.9919      | [OX2H0][CX4H2][CX4H1]([CX4H1])[CX4H1]     | 0.0         |
| [#6X3][#6X3][#6X3][#6X3]         | 0.9906      | [CX4H0]([NX3H1])([CX4H3])([CX4H2])[CX4H1] | 0.0         |
| [cH]                             | 0.9757      | [OX2H0][CX4H2][CX4H1]([CX4H1])[CX4H3]     | 0.0         |
| [cX3H1]([cX3H1])[cX3H0]          | 0.9565      | [OX2H1][CX4H1]1[CX4H1][CX4H2][CX4H1]1     | 0.0         |
| [#6X3H1][#6X3H0]                 | 0.9508      | [OX1H0]=[CX3H0]1[CX4H1][CX4H1][CX4H2]1    | 0.0         |
| [#7][#6][#6X3]                   | 0.9211      | [CX4H0]([OX2H0])([CX4H3])([CX4H2])[CX4H2] | 0.0         |
| [#6H1][#6H1]                     | 0.9082      | [OX2H0][CX4H2][CX4H2][CX4H1][OX2H0]       | 0.0         |
| [#6X3][#7][#6X3]                 | 0.8886      | [OX2H1][CX4H1][CX4H1]([CX4H1])[CX4H1]     | 0.0         |
| <b>worst negatives</b>           | <b>prob</b> | <b>worst positives</b>                    | <b>prob</b> |
| [#8][#6H0][#6H1]                 | 0.8139      | [CX3](=[OX1])O                            | 0.1568      |
| [cH]cO                           | 0.7154      | O=[#6][#6][#6X3]                          | 0.2142      |
| [OX2H][cX3]:[c]                  | 0.6126      | [CX3](=O)[OX2H1]                          | 0.2144      |
| [#6X3H1][#6X3H1][#6X3H0][#6X3H1] | 0.5717      | [cX3H1]([NX3H1])[cX3H1]                   | 0.274       |
| [#6X3H1][#7X3H0]                 | 0.3303      | [#7X3H1]                                  | 0.3488      |
| [cX3H0]([cX3H1])([cX3H0])[OX2H1] | 0.3166      | [#8]=[#6][#8]                             | 0.3893      |
| [#6]1[#6][#6][#6][#6][#6]1       | 0.297       | [#7H][#6X3H1]                             | 0.458       |
| [#7H2][#6H0]                     | 0.276       | [#6H1r5][#7]                              | 0.5552      |
| O=[cX3]                          | 0.2728      | [#7][#6H0][#6H1]                          | 0.635       |
| [#7X3H0]                         | 0.2708      | [#7][#6X3H0][#6X3H1]                      | 0.6432      |

---

Example 43 true smiles: CC(=CC(=O)O)C(=O)O formula: C5H6O4  
 Index of correct structure: 1 of 2762  
 True structure loss: 0.04138  
 True structure:

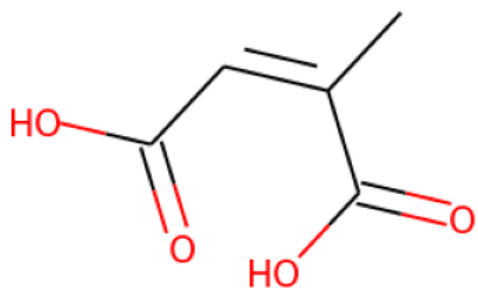

Experimental <sup>13</sup>C NMR (solvent: N/A)

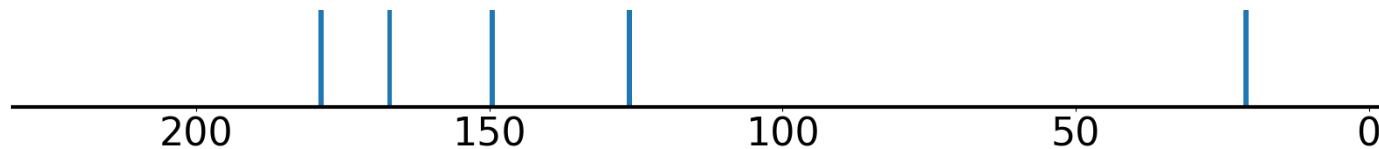

Experimental <sup>1</sup>H NMR (solvent: D2O)

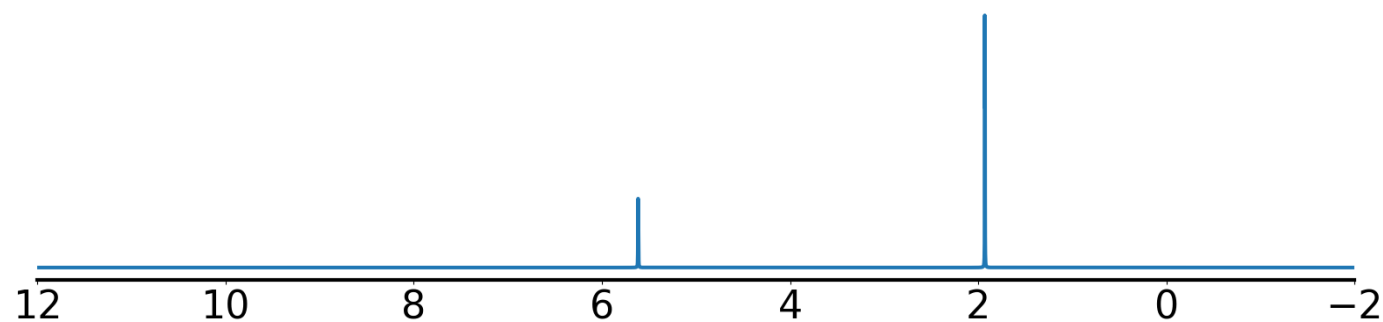

Top predicted structures (loss):

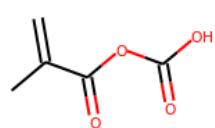

0.033174

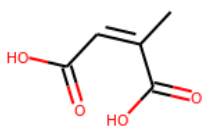

0.04138

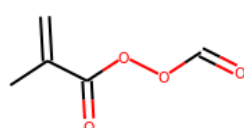

0.047924

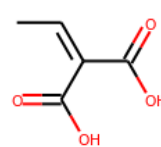

0.056259

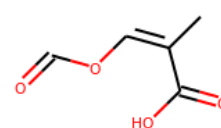

0.059278

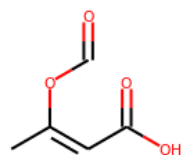

0.064331

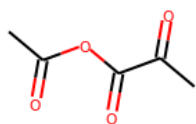

0.064575

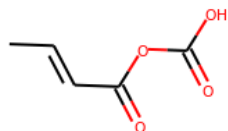

0.068804

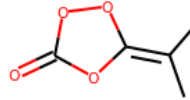

0.07264

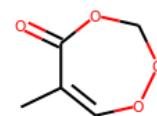

0.07275



| Top predicted substructures      | prob        |                                       | prob        |
|----------------------------------|-------------|---------------------------------------|-------------|
| [CX4H3]                          | 0.9998      | [#6H3][#6H0]                          | 0.9973      |
| [#8]=[#6][#8]                    | 0.9993      | [CX3](=[OX1])C                        | 0.9923      |
| [CX3](=[OX1])O                   | 0.999       | [CX4H3][CX3]                          | 0.9833      |
| [CX4H3][#6]                      | 0.9981      | [CX4H3][CX3H0]                        | 0.9736      |
| [#6X3][#6X3]                     | 0.9975      | [CX3](=O)[OX2H1]                      | 0.967       |
| <b>best positives</b>            | <b>prob</b> | <b>best negatives</b>                 | <b>prob</b> |
| [CX4H3]                          | 0.9998      | [CX2H0](#[CX2H0])[CX2H0]              | 0.0         |
| [#8]=[#6][#8]                    | 0.9993      | [CX2H0](#[CX2H1])[CX4H0]              | 0.0         |
| [CX3](=[OX1])O                   | 0.999       | [CX4H1]([CX4H2])([CX4H1])[CX2H0]      | 0.0         |
| [CX4H3][#6]                      | 0.9981      | [OX2H0]1[CX4H2][CX4H2][CX4H1][CX4H1]1 | 0.0         |
| [#6X3][#6X3]                     | 0.9975      | [CX4H2]([CX4H0])[CX2H0]               | 0.0         |
| [#6H3][#6H0]                     | 0.9973      | CCC#CC#C                              | 0.0         |
| [CX3](=[OX1])C                   | 0.9923      | [CX4H1]([CX4H2])([CX4H2])[CX2H0]      | 0.0         |
| [CX4H3][CX3]                     | 0.9833      | [CX4H1]([CX4H1])([CX4H1])[CX2H0]      | 0.0         |
| [CX4H3][CX3H0]                   | 0.9736      | CC#CCC#C                              | 0.0         |
| [CX3](=O)[OX2H1]                 | 0.967       | CCC=CC#C                              | 0.0         |
| <b>worst negatives</b>           | <b>prob</b> | <b>worst positives</b>                | <b>prob</b> |
| [CX4H3][CX3H0]=[CX3H2]           | 0.7484      | [#6X3][#6X3]=[#6X3][#6X3]             | 0.0197      |
| O=[#6][#6][#6X3]                 | 0.7386      | [CH3]CC[OH]                           | 0.0361      |
| [CX3H2]=[CX3H0][CX3H0]           | 0.653       | [OX1H0]=[CX3H0][CX3H1]=[CX3H0]        | 0.0415      |
| [#8][#6][#6]=[#8]                | 0.5941      | [#8][#6][#6]=[#6][#6][#8]             | 0.0761      |
| [#8]=[#6][#6]=[#8]               | 0.4737      | [CHX3](=C)C                           | 0.138       |
| [CX3H0]([CX3H2])([CX4H3])[CX3H0] | 0.4466      | [#8][#6][#6]=[#6][#6]=[#8]            | 0.2284      |
| [CH2X3](=C)                      | 0.4001      | [#8]=[#6][#6]=[#6][#6]=[#8]           | 0.2333      |
| O=CC=O                           | 0.3651      | [CX3H1](=[CX3H0])[CX3H0]              | 0.239       |
| [#8][#6][#6][#6X3]               | 0.3648      | [#6X3H1][#6X3H0]                      | 0.3116      |
| [CX3H2]=[CX3H0][CX3]=O           | 0.3647      | [CX3H0]([CX3H1])([CX4H3])[CX3H0]      | 0.3755      |

---

Example 44 true smiles: O=C(O)c1ccccc1 formula: C7H6O2  
Index of correct structure: 0 of 2390  
True structure loss: 0.013018  
True structure:

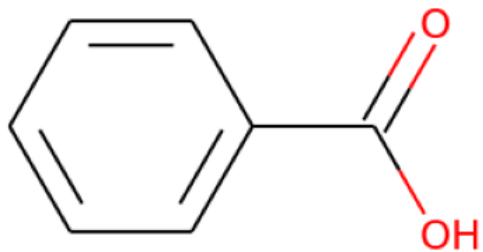

Experimental <sup>13</sup>C NMR (solvent: CDCl<sub>3</sub>)

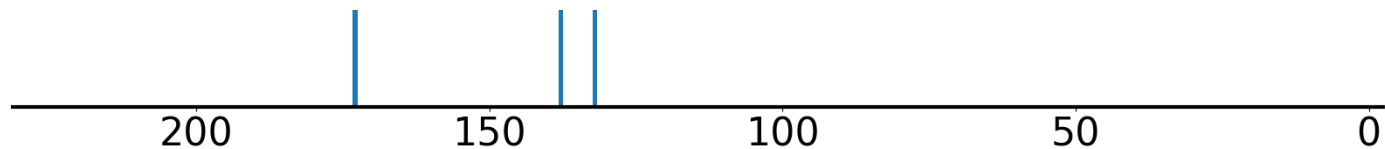

Experimental <sup>1</sup>H NMR (solvent: d<sub>2</sub>o)

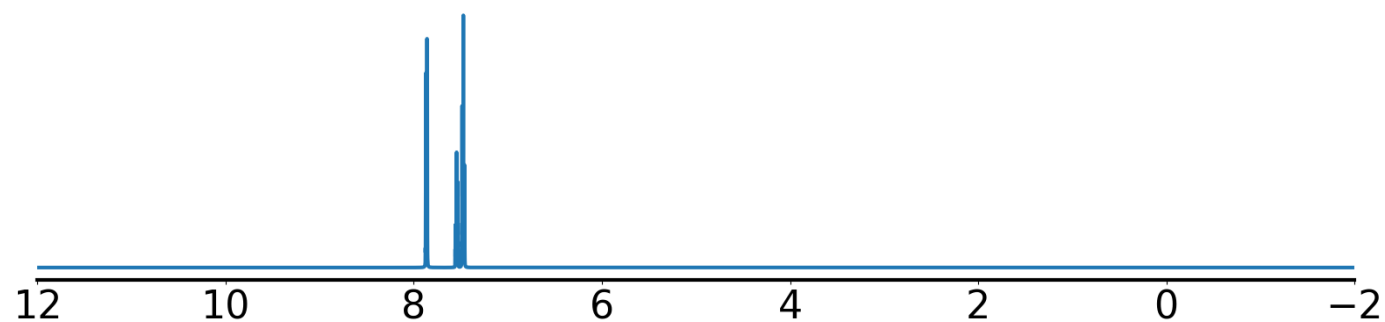

Top predicted structures (loss):

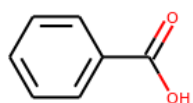

0.013018

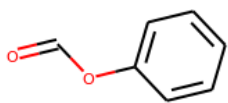

0.026863

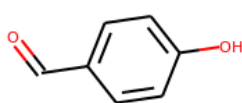

0.030436

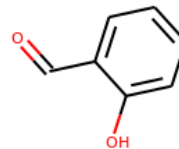

0.030571

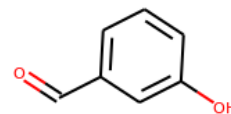

0.039667

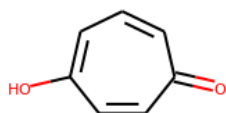

0.04025

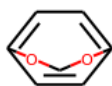

0.043328

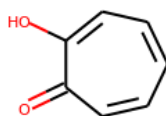

0.044723

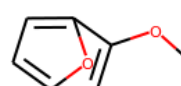

0.048973

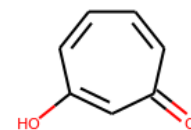

0.05015

|                                |        |                                           |        |
|--------------------------------|--------|-------------------------------------------|--------|
| Top predicted substructures    | prob   |                                           |        |
| [#6X3][#6X3]                   | 0.9993 | [#8]=[#6][#8]                             | 0.8863 |
| [#6H1]                         | 0.9989 | [cH]                                      | 0.8725 |
| [#6X3H1][#6X3H0]               | 0.9516 | [cX3H1]([cX3H1])[cX3H0]                   | 0.8503 |
| [cH][cH]                       | 0.9488 | O=[#6][#6][#6X3]                          | 0.8489 |
| [#6X3][#6X3][#6X3][#6X3]       | 0.9487 | [CX3](=[OX1])O                            | 0.8424 |
| best positives                 | prob   | best negatives                            | prob   |
| [#6X3][#6X3]                   | 0.9993 | [#6H3][#7][#6X4H1][#6H3]                  | 0.0    |
| [#6H1]                         | 0.9989 | [CX4H0]([NX3H1])([CX4H3])([CX4H2])[CX4H1] | 0.0    |
| [#6X3H1][#6X3H0]               | 0.9516 | [#6H3][#6H0][#7][#6H3]                    | 0.0    |
| [cH][cH]                       | 0.9488 | [CX4H1]([NX3H2])([CX4H2])[CX3H1]          | 0.0    |
| [#6X3][#6X3][#6X3][#6X3]       | 0.9487 | [CX4H1]([NX3H2])([CX4H3])[CX4H1]          | 0.0    |
| [#8]=[#6][#8]                  | 0.8863 | [CX4H2]([NX3H1])[CX4H3]                   | 0.0    |
| [cH]                           | 0.8725 | [CX4H1]([NX3H0])([CX4H3])[CX4H1]          | 0.0    |
| [cX3H1]([cX3H1])[cX3H0]        | 0.8503 | [CX4H1]([NX3H1])([CX4H3])[CX4H2]          | 0.0    |
| O=[#6][#6][#6X3]               | 0.8489 | [CX4H1]([NX3H1])([CX4H3])[CX4H1]          | 0.0    |
| [CX3](=[OX1])O                 | 0.8424 | [CX4H0]([NX3H1])([CX4H2])([CX4H2])[CX4H1] | 0.0    |
| worst negatives                | prob   | worst positives                           | prob   |
| [CX3](=[OX1])C                 | 0.6131 | [#6]1[#6][#6][#6][#6]1                    | 0.5472 |
| [#8]=[#6H0][#6H1]              | 0.5705 | [OX2H1]                                   | 0.5595 |
| [#6X3][#6X3]=[#6X3][#6X3]      | 0.4553 | [#8][#6][#6][#6X3]                        | 0.5959 |
| [#8][#6H0][#6H1]               | 0.3952 | [CX3](=[O])[OX2H1]                        | 0.5966 |
| [OX1H0]=[cX3H0][cX3H1]         | 0.2532 | [#6X3H1][#6X3H1][#6X3H0][#6X3H1]          | 0.6833 |
| O=[cX3]                        | 0.2422 | [#6H1][#6H1]                              | 0.8052 |
| [#6H][#8][#6H]                 | 0.24   | [cX3H1]([cX3H1])[cX3H1]                   | 0.8303 |
| [cH]cO                         | 0.2097 | [CX3](=[OX1])O                            | 0.8424 |
| [OX1H0]=[CX3H0][CX3H1]=[CX3H1] | 0.1892 | O=[#6][#6][#6X3]                          | 0.8489 |
| [CX3H0][CX3H1]=[CX3H1][CX3H0]  | 0.1823 | [cX3H1]([cX3H1])[cX3H0]                   | 0.8503 |

---

Example 45 true smiles: Cc1cccc(C)n1 formula: C7H9N  
Index of correct structure: 1 of 1755  
True structure loss: 0.017191  
True structure:

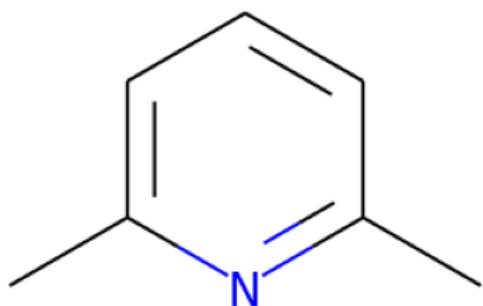

Experimental <sup>13</sup>C NMR (solvent: CDCl<sub>3</sub>)

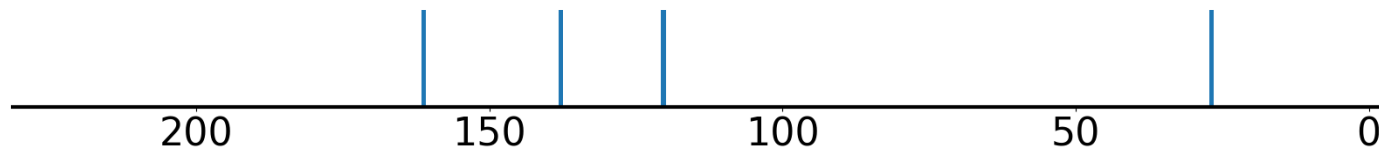

Experimental <sup>1</sup>H NMR (solvent: CDCl<sub>3</sub>)

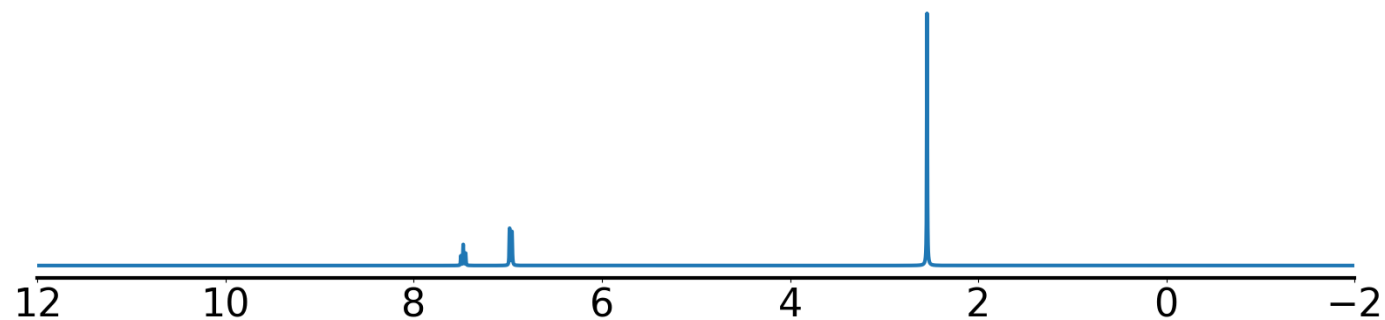

Top predicted structures (loss):

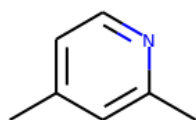

0.017047

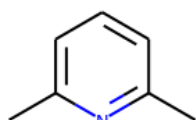

0.017191

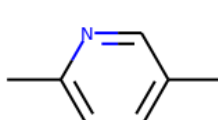

0.019012

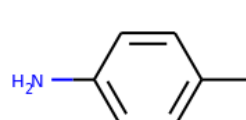

0.020059

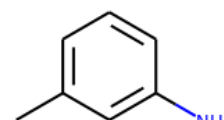

0.021291

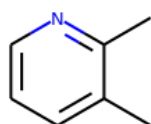

0.023169

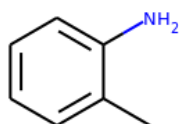

0.023339

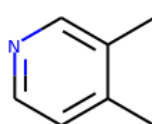

0.030276

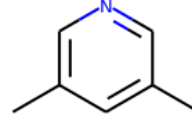

0.031111

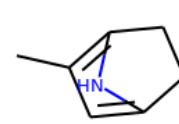

0.034149

| Top predicted substructures      | prob        |                                        |  |             |
|----------------------------------|-------------|----------------------------------------|--|-------------|
| [#6X3][#6X3]                     | 0.99        | [cH][cH]                               |  | 0.9405      |
| [#6H1]                           | 0.9892      | [CX4H3][cX3H0]                         |  | 0.9389      |
| [#6H3][#6][#6]                   | 0.9851      | [cH]                                   |  | 0.9349      |
| [#6X3][#6X3][#6X3][#6X3]         | 0.9797      | [#7][#6][#6][#6X3]                     |  | 0.9148      |
| [#6X3H1][#6X3H0]                 | 0.9457      | [#7][#6][#6X3]                         |  | 0.8934      |
| <b>best positives</b>            | <b>prob</b> | <b>best negatives</b>                  |  | <b>prob</b> |
| [#6X3][#6X3]                     | 0.99        | [OX2H1][CX4H2][CX4H1]([OX2H0])[CX4H1]  |  | 0.0         |
| [#6H1]                           | 0.9892      | [#8][#6H1][#6H2][#6H1]=[#8]            |  | 0.0         |
| [#6H3][#6][#6]                   | 0.9851      | [OX2H0]1[CX4H2][CX4H1][CX4H1]1         |  | 0.0         |
| [#6X3][#6X3][#6X3][#6X3]         | 0.9797      | [OX2H0]1[CX4H2][CX4H2][CX4H1][CX4H1]1  |  | 0.0         |
| [#6X3H1][#6X3H0]                 | 0.9457      | [OX2H0][CX4H2][CX4H0][OX2H0]           |  | 0.0         |
| [cH][cH]                         | 0.9405      | [OX1H0]=[CX3H0]1[CX4H1][CX4H1][CX4H2]1 |  | 0.0         |
| [CX4H3][cX3H0]                   | 0.9389      | [OX2H1][CX4H0][CX4H2][CX4H0]           |  | 0.0         |
| [cH]                             | 0.9349      | [#6]1[#8][#6][#6]1=[#8]                |  | 0.0         |
| [#7][#6][#6][#6X3]               | 0.9148      | [OX2H0][CX4H2][CX4H2][CX4H1][OX2H0]    |  | 0.0         |
| [#7][#6][#6X3]                   | 0.8934      | [OX2H1][CX4H1][CX4H1]([CX4H1])[CX4H1]  |  | 0.0         |
| <b>worst negatives</b>           | <b>prob</b> | <b>worst positives</b>                 |  | <b>prob</b> |
| [#6X3H1][#6X3H1][#6X3H0][#6X3H1] | 0.726       | [#6H3][#6H0][#7H0][#6H0]               |  | 0.1658      |
| [CX4H2][CX4H2]                   | 0.7115      | [#7][#6][#6H3]                         |  | 0.3638      |
| [#6]1[#6][#6][#6][#6][#6]1       | 0.63        | [#7][#6H0][#6H1]                       |  | 0.4524      |
| [cX3H0][cX3H1][cX3H1][cX3H0]     | 0.4074      | [cX3H1]([cX3H1])[cX3H1]                |  | 0.4633      |
| [#6X3H0][CX4H2][CX4H2][#6X3H0]   | 0.3855      | [#7]1[#6X3H0][#6X3H1]                  |  | 0.555       |
| [CX4H2]([#6])[#6]                | 0.3564      | [#6X3][#7][#6X3]                       |  | 0.6227      |
| [cX3H1]([nX2H0])[cX3H1]          | 0.2327      | [#6H3][#6H0]                           |  | 0.7314      |
| [CX4H2]([CX4H2])[cX3H0]          | 0.2276      | [#6]1[#6][#6][#6][#6][#7]1             |  | 0.7467      |
| [cX3H1]([cX3H0])[cX3H0]          | 0.1968      | [#6H3][#6][#6X3]                       |  | 0.802       |
| [cX3H1]([nX2H0])[cX3H0]          | 0.1816      | [#6X3][#6][#6][#6H3]                   |  | 0.8164      |

---

Example 46 true smiles: Cc1ccncc1C formula: C7H9N  
Index of correct structure: 7 of 1755  
True structure loss: 0.024065  
True structure:

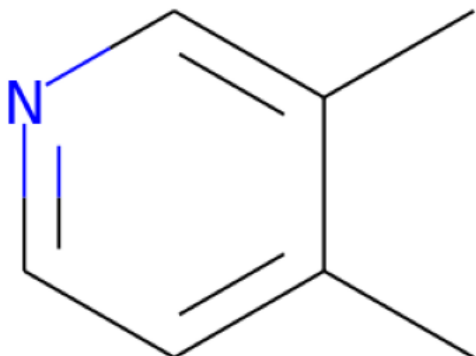

Experimental <sup>13</sup>C NMR (solvent: CDCl<sub>3</sub>)

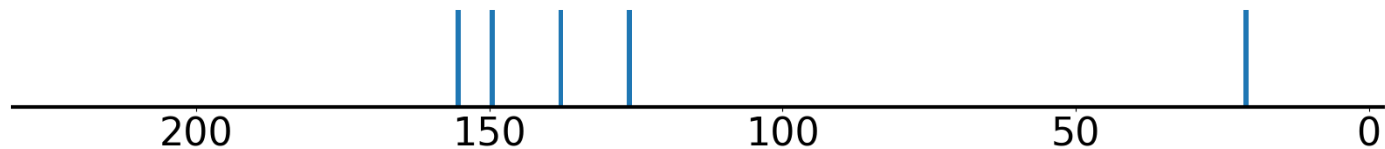

Experimental <sup>1</sup>H NMR (solvent: CDCl<sub>3</sub>)

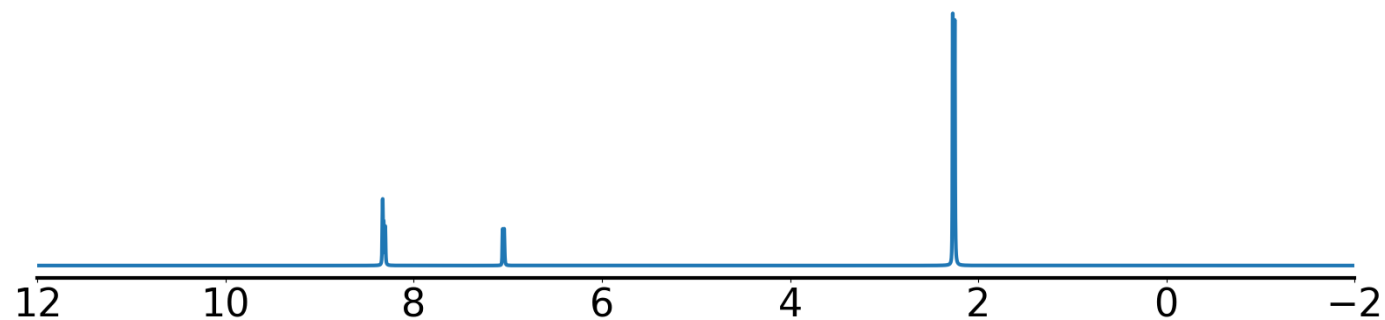

Top predicted structures (loss):

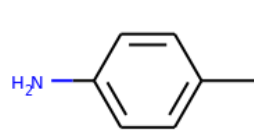

0.016077

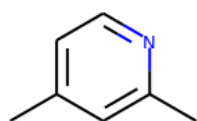

0.016351

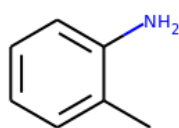

0.01637

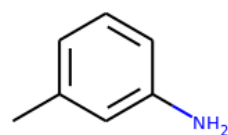

0.017264

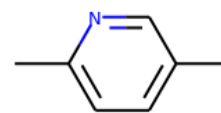

0.018944

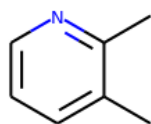

0.019078

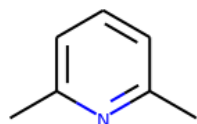

0.019737

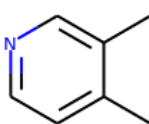

0.024065

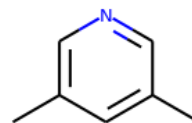

0.029088

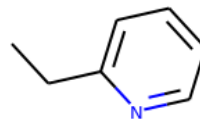

0.035916

|                                  |        |                                        |        |
|----------------------------------|--------|----------------------------------------|--------|
| Top predicted substructures      | prob   |                                        |        |
| [#6X3][#6X3]                     | 0.9986 | [cH][cH]                               | 0.9761 |
| [#6H1]                           | 0.9979 | [#6X3H1][#6X3H0]                       | 0.971  |
| [#6X3][#6X3][#6X3][#6X3]         | 0.9952 | [CX4H3][cX3H0]                         | 0.971  |
| [CX4H3][#6]                      | 0.995  | [CX4H3]                                | 0.9617 |
| [#6H3][#6][#6]                   | 0.9947 | [#6X3][#6][#6][#6H3]                   | 0.9529 |
| best positives                   | prob   | best negatives                         | prob   |
| [#6X3][#6X3]                     | 0.9986 | [OX1H0]=[CX3H0]1[CX4H1][CX4H1][CX4H2]1 | 0.0    |
| [#6H1]                           | 0.9979 | [#8][#6H1][#6H2][#6H1]=[#8]            | 0.0    |
| [#6X3][#6X3][#6X3][#6X3]         | 0.9952 | [OX2H0]1[CX4H2][CX4H2][CX4H1][CX4H1]1  | 0.0    |
| [CX4H3][#6]                      | 0.995  | [OX2H0]1[CX4H2][CX4H1][CX4H1]1         | 0.0    |
| [#6H3][#6][#6]                   | 0.9947 | [#6]1[#8][#6][#6]1=[#8]                | 0.0    |
| [cH][cH]                         | 0.9761 | [CX3H0](=[OX1H0])([OX2H0])[CX4H2]      | 0.0    |
| [#6X3H1][#6X3H0]                 | 0.971  | [OX2H0][CX4H2][CX4H0][OX2H0]           | 0.0    |
| [CX4H3][cX3H0]                   | 0.971  | [OX2H1][CX4H1]1[CX4H1][CX4H2][CX4H1]1  | 0.0    |
| [CX4H3]                          | 0.9617 | [OX2H0]1[CX4H0][CX4H1]1                | 0.0    |
| [#6X3][#6][#6][#6H3]             | 0.9529 | [OX2H0]1[CX4H2][CX4H1]1[CX4H1]         | 0.0    |
| worst negatives                  | prob   | worst positives                        | prob   |
| [#6]1[#6][#6][#6][#6]1           | 0.7845 | [#6H3][#6][#6][#6H3]                   | 0.0114 |
| [#6X3H1][#6X3H1][#6X3H0][#6X3H1] | 0.6734 | [#6H3][#6H0][#6H1][#7]                 | 0.052  |
| [cX3H1]([cX3H1])[cX3H1]          | 0.5304 | [#6H1][#7][#6H1]                       | 0.0541 |
| [#7][#6X3H0][#6X3H1]             | 0.4605 | [cX3H1]([nX2H0])[cX3H0]                | 0.3301 |
| [#7X3H2]                         | 0.3889 | [cX3H0]([cX3H1])([cX3H0])[CX4H3]       | 0.4508 |
| [CX4H2]([#6])[#6]                | 0.3765 | [cX3H1]([nX2H0])[cX3H1]                | 0.5319 |
| [cX3H0][cX3H1][cX3H1][cX3H0]     | 0.3731 | [#6X3][#7][#6X3]                       | 0.6087 |
| [#7][#6H0][#6H1]                 | 0.3277 | [#6H3][#6H0]                           | 0.8372 |
| [#7H2][#6H0]                     | 0.2506 | [cX3H1]([cX3H1])[cX3H0]                | 0.867  |
| [CX4H2][CX3H]                    | 0.1766 | [#6H1][#6H1]                           | 0.8787 |

---

Example 47 true smiles: NCCCNCN formula: C6H17N3  
Index of correct structure: 0 of 1323  
True structure loss: 0.009571  
True structure:

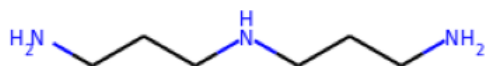

Experimental <sup>13</sup>C NMR (solvent: CDCl<sub>3</sub>)

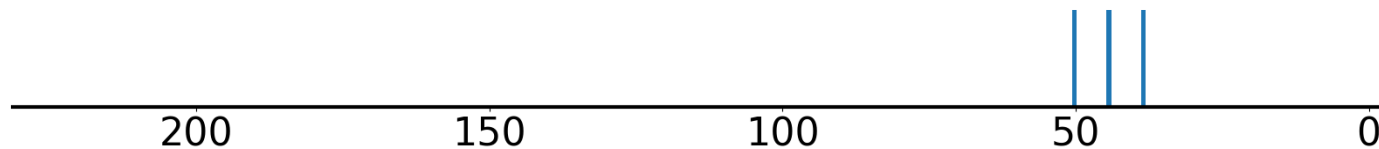

Experimental <sup>1</sup>H NMR (solvent: D<sub>2</sub>O)

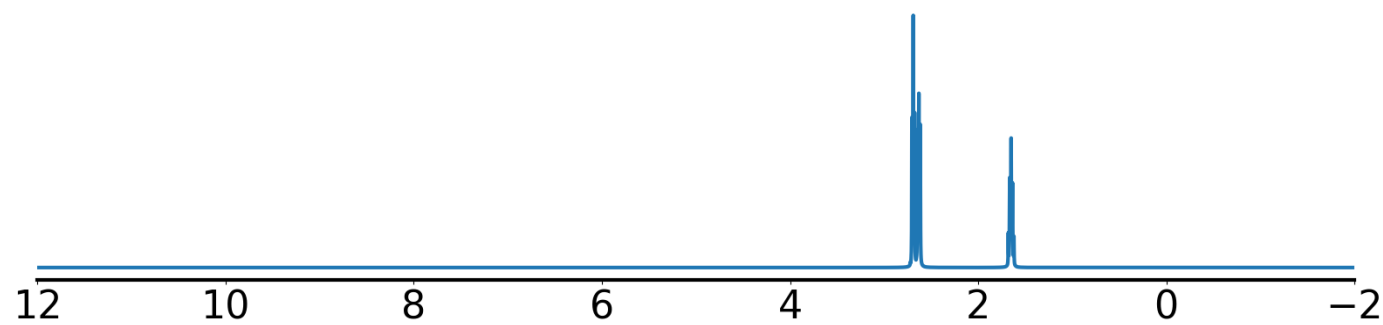

Top predicted structures (loss):

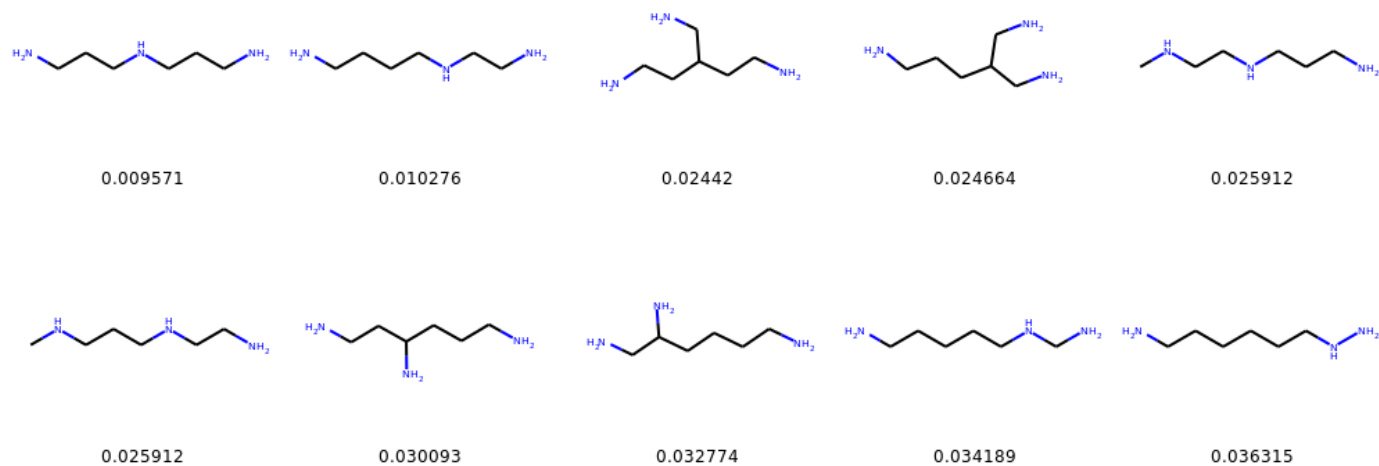



|                                  |        |                                   |        |
|----------------------------------|--------|-----------------------------------|--------|
| Top predicted substructures      | prob   |                                   |        |
| [#7X3H2]                         | 0.9996 | [#7][#6H2][#6H2]                  | 0.9846 |
| [#7X3][#6H2]                     | 0.9987 | [CX4H2]([NX3H2])[CX4H2]           | 0.9786 |
| [#7][#6H2]                       | 0.9971 | [CX4H2][CX4H2]                    | 0.905  |
| [CX4H2]([#6])[#6]                | 0.9893 | [CX4H2]([NX3H1])[CX4H2]           | 0.7325 |
| [#7H2][#6H2]                     | 0.9879 | [#7][#6][#6][#6][#7]              | 0.7094 |
| best positives                   | prob   | best negatives                    | prob   |
| [#7X3H2]                         | 0.9996 | [CX2H0](#[CX2H1])[CX3H0]          | 0.0    |
| [#7X3][#6H2]                     | 0.9987 | [CX2H0](#[CX2H0])[CX2H0]          | 0.0    |
| [#7][#6H2]                       | 0.9971 | [#6X2][#6H1][#6X2]                | 0.0    |
| [CX4H2]([#6])[#6]                | 0.9893 | [CX2H1]#[CX2H0][CX3H1]=[CX3H0]    | 0.0    |
| [#7H2][#6H2]                     | 0.9879 | C=CCCC#C                          | 0.0    |
| [#7][#6H2][#6H2]                 | 0.9846 | [CX3H0](=[CX3H1])([OX2H0])[CX2H0] | 0.0    |
| [CX4H2]([NX3H2])[CX4H2]          | 0.9786 | C=CC=CC#C                         | 0.0    |
| [CX4H2][CX4H2]                   | 0.905  | CC=CC#CC                          | 0.0    |
| [CX4H2]([NX3H1])[CX4H2]          | 0.7325 | [CX2H0](#[CX2H1])[CX3H0]          | 0.0    |
| [#7][#6][#6][#6][#7]             | 0.7094 | CC#CCC#C                          | 0.0    |
| worst negatives                  | prob   | worst positives                   | prob   |
| [#7][#6H2][#6H2][#7]             | 0.6931 | [#6H2][#7][#6H2]                  | 0.3072 |
| [#7][#6][#6][#6][#6][#7]         | 0.616  | [#7X3H1]                          | 0.3477 |
| [CX4H2][CX4H2][CX4H2][CX4H2]     | 0.4146 | [CX4H2]([CX4H2])[CX4H2]           | 0.483  |
| [#7][#6][#6][#6][#7]             | 0.3264 | [#7][#6][#6][#6][#7]              | 0.7094 |
| [#6H1][#6H2]                     | 0.2722 | [CX4H2]([NX3H1])[CX4H2]           | 0.7325 |
| [CX4H2]([NX3H2])[CX4H1]          | 0.2271 | [CX4H2][CX4H2]                    | 0.905  |
| [#7][#6H2][#6H2][#6H1]           | 0.1618 | [CX4H2]([NX3H2])[CX4H2]           | 0.9786 |
| [#6H1]                           | 0.1591 | [#7][#6H2][#6H2]                  | 0.9846 |
| [CX4H1]([CX4H2])([CX4H2])[CX4H2] | 0.1507 | [#7H2][#6H2]                      | 0.9879 |
| [#6H1]([#6H2])[#6H2]             | 0.1469 | [CX4H2]([#6])[#6]                 | 0.9893 |

---

Example 48 true smiles: CN1CCCC1=O formula: C5H9NO  
Index of correct structure: 2 of 1318  
True structure loss: 0.045538  
True structure:

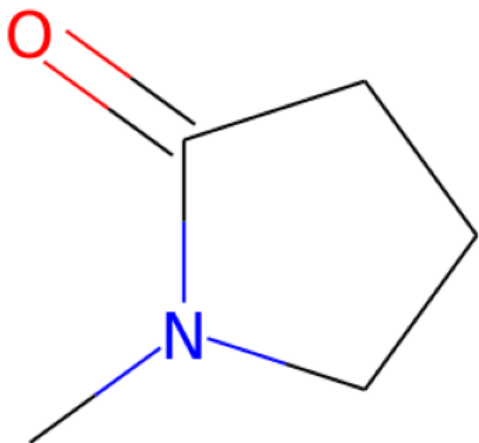

Experimental <sup>13</sup>C NMR (solvent: CDCl<sub>3</sub>)

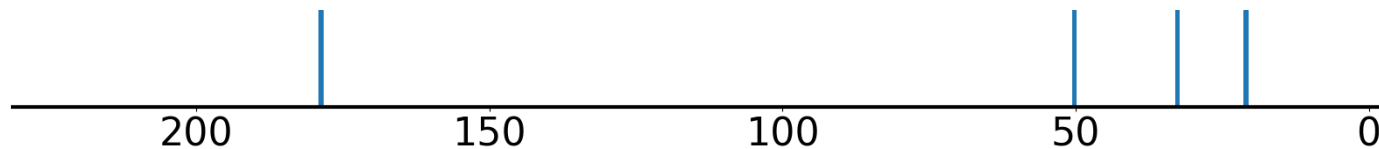

Experimental <sup>1</sup>H NMR (solvent: CDCl<sub>3</sub>)

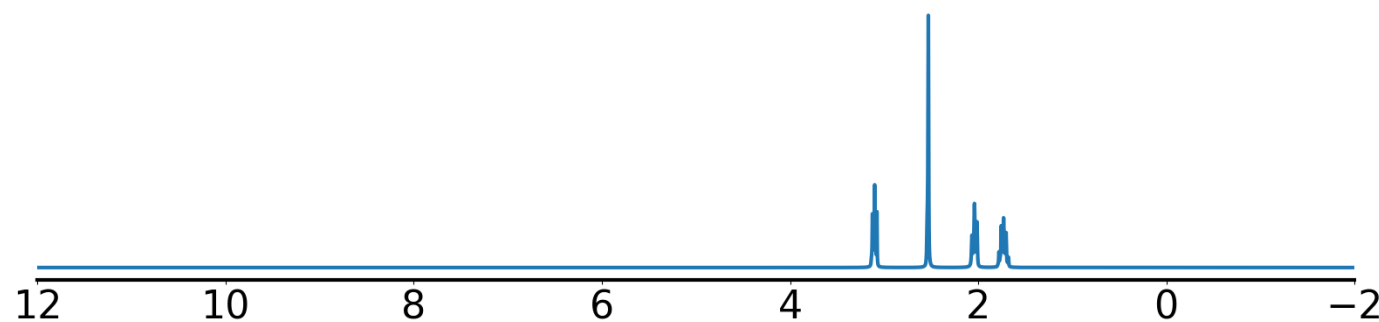

Top predicted structures (loss):

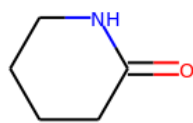

0.030037

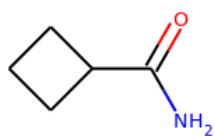

0.035512

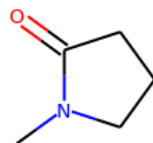

0.045538

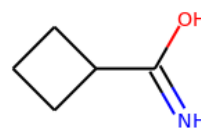

0.050304

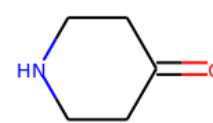

0.053616

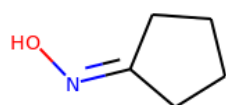

0.059961

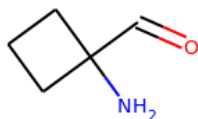

0.060548

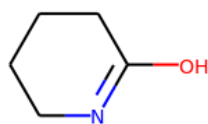

0.061676

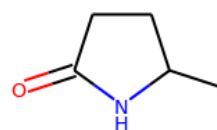

0.061735

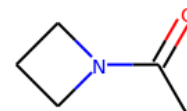

0.063207

|                                |        |                                    |        |
|--------------------------------|--------|------------------------------------|--------|
| Top predicted substructures    | prob   |                                    |        |
| [CX4H2]([#6])[#6]              | 0.9949 | [CX4H2]([CX4H2])[CX4H1]            | 0.8318 |
| [CX3](=[OX1])C                 | 0.9596 | [CX4H2]([CX4H2])[CX4H2]            | 0.7864 |
| [CX4H2][CX4H2]                 | 0.9122 | [#6H1][#6H2]                       | 0.7342 |
| [#7][#6H2]                     | 0.8381 | [#7X3][#6H2]                       | 0.6885 |
| [CX4H2]CC=O                    | 0.8348 | C1CCC1                             | 0.6839 |
| best positives                 | prob   | best negatives                     | prob   |
| [CX4H2]([#6])[#6]              | 0.9949 | [CX3H0](=[CX3H1])([OX2H0])[CX2H0]  | 0.0    |
| [CX3](=[OX1])C                 | 0.9596 | C=CC=CC#C                          | 0.0    |
| [CX4H2][CX4H2]                 | 0.9122 | [CX2H1]#[CX2H0][CX3H1]=[CX3H0]     | 0.0    |
| [#7][#6H2]                     | 0.8381 | CC=CC#CC                           | 0.0    |
| [CX4H2]CC=O                    | 0.8348 | [CX3H1](=[CX3H2])[CX2H0]           | 0.0    |
| [CX4H2]([CX4H2])[CX4H2]        | 0.7864 | [CX3H1](=[CX3H1])[CX2H0]           | 0.0    |
| [#7X3][#6H2]                   | 0.6885 | [#6X3H1]=[#6X3H1][#6X3H0]=[#6X3H1] | 0.0    |
| [#7][#6H2][#6H2]               | 0.6064 | CCC#CC=C                           | 0.0    |
| [CX4H2][CX3]=O                 | 0.4323 | [CX2H0]([CX2H1])[CX3H0]            | 0.0    |
| [CX4H2]([CX4H2])[CX3H0]        | 0.38   | [CX2H0]([CX2H0])[CX2H0]            | 0.0    |
| worst negatives                | prob   | worst positives                    | prob   |
| [CX4H2]([CX4H2])[CX4H1]        | 0.8318 | [#6H3][#7][#6X3]                   | 0.036  |
| [#6H1][#6H2]                   | 0.7342 | [CX3H0](=[OX1H0])([NX3H0])[CX4H2]  | 0.0564 |
| C1CCC1                         | 0.6839 | [CX4H3][NX3H0]                     | 0.0906 |
| [#6H1]                         | 0.6452 | [#6H3][#7X3H0][#6X4H2][#6X4H2]     | 0.0997 |
| [#8]=[#6H0][#6H1]              | 0.4937 | [#6H3][#7]                         | 0.1463 |
| [#7X3H1]                       | 0.4663 | [#7X3H0]                           | 0.1509 |
| [#6H1]([#6H2])[#6H2]           | 0.4376 | [CX4H2]([NX3H0])[CX4H2]            | 0.159  |
| O=[CX3][CX4H]                  | 0.4318 | [#6H3][#7][#6H2]                   | 0.1724 |
| [CX4H1]1[CX4H2][CX4H2][CX4H2]1 | 0.3424 | [#6H2][#7][#6X3]                   | 0.2156 |
| [#7][#6H0][#6H1]               | 0.3285 | O=[CX3H0][CX4H2][CX4H2]            | 0.3021 |

---

Example 49 true smiles: Cc1cc(C)[nH]n1 formula: C5H8N2  
Index of correct structure: 4 of 1068  
True structure loss: 0.027633  
True structure:

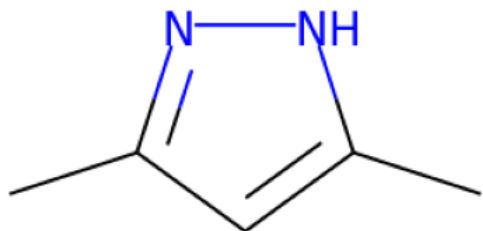

Experimental <sup>13</sup>C NMR (solvent: CDCl<sub>3</sub>)

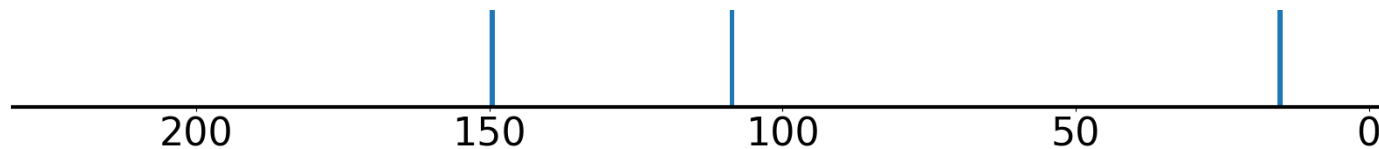

Experimental <sup>1</sup>H NMR (solvent: CDCl<sub>3</sub>)

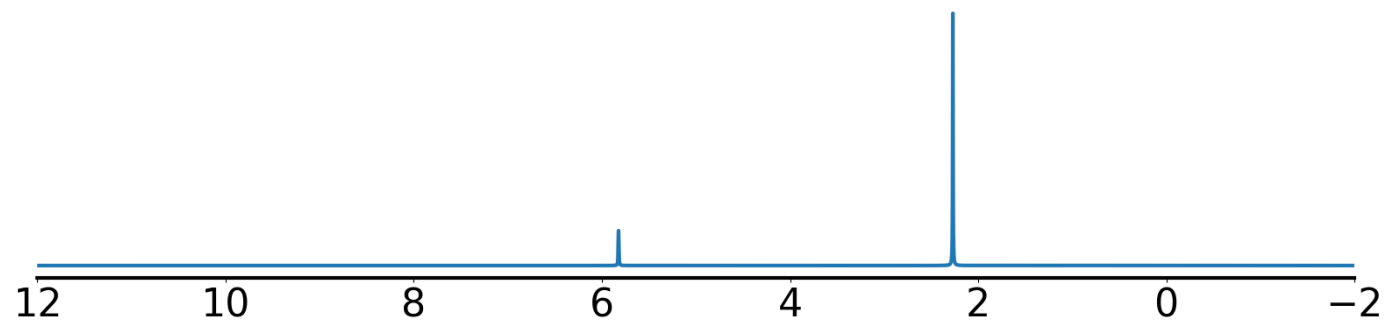

Top predicted structures (loss):

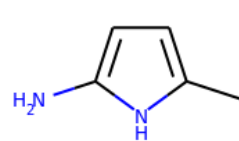

0.020162

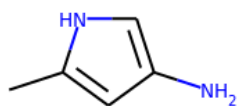

0.023502

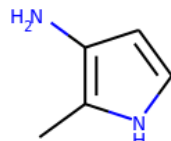

0.024498

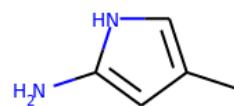

0.027619

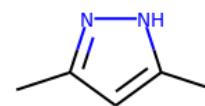

0.027633

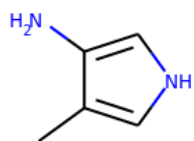

0.031007

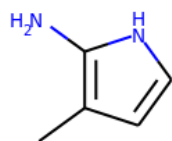

0.031025

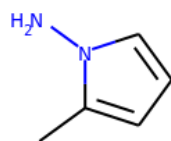

0.032053

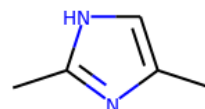

0.033125

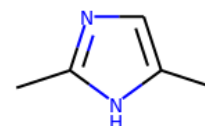

0.035215

| Top predicted substructures | prob   |                                        |        |
|-----------------------------|--------|----------------------------------------|--------|
| [CX4H3]                     | 0.9981 | [#6H3][#6][#6]                         | 0.9385 |
| [#6H3][#6H0]                | 0.991  | [#6X3][#6][#6][#6H3]                   | 0.915  |
| [CX4H3][cX3H0]              | 0.9804 | [#7][#6][#6][#6X3]                     | 0.9105 |
| [#6X3][#6X3]                | 0.969  | [#7][#6][#6X3]                         | 0.9095 |
| [CX4H3][#6]                 | 0.9594 | [#7][#6][#6H3]                         | 0.8995 |
| best positives              | prob   | best negatives                         | prob   |
| [CX4H3]                     | 0.9981 | [#8][#6H1][#6H2][#6H1]=[#8]            | 0.0    |
| [#6H3][#6H0]                | 0.991  | [OX1H0]=[CX3H0]1[CX4H1][CX4H1][CX4H2]1 | 0.0    |
| [CX4H3][cX3H0]              | 0.9804 | [CX4H1]([OX2H1])([CX4H2])[CX2H0]       | 0.0    |
| [#6X3][#6X3]                | 0.969  | [OX2H1][CX4H2][CX4H1]([OX2H0])[CX4H1]  | 0.0    |
| [CX4H3][#6]                 | 0.9594 | [OX2H0][CX4H2][CX4H2][CX4H1][OX2H0]    | 0.0    |
| [#6H3][#6][#6]              | 0.9385 | [OX2H0]1[CX4H2][CX4H2][CX4H1][CX4H1]1  | 0.0    |
| [#6X3][#6][#6][#6H3]        | 0.915  | [OX2H1][CX4H1][CX4H1]([CX4H2])[CX4H2]  | 0.0    |
| [#7][#6][#6][#6X3]          | 0.9105 | [OX2H1][CX4H1]1[CX4H1][CX4H2][CX4H1]1  | 0.0    |
| [#7][#6][#6X3]              | 0.9095 | [OX2H0][CX4H2][CX4H1]([CX4H1])[CX4H1]  | 0.0    |
| [#7][#6][#6H3]              | 0.8995 | [OX2H0][CX4H2][CX4H0][OX2H0]           | 0.0    |
| worst negatives             | prob   | worst positives                        | prob   |
| [#6X3][#6X3][#6X3][#6X3]    | 0.8876 | [#7][#7H1]                             | 0.0626 |
| [#6X3][#7X3][#6X3]          | 0.8077 | [cX3H1]([cX3H0])[cX3H0]                | 0.2896 |
| [#6X3][#7][#6X3]            | 0.7695 | [#7][#7]                               | 0.3219 |
| [#7X3H2]                    | 0.6337 | [#7][#6][#6][#6][#7]                   | 0.3345 |
| [cH][cH]                    | 0.6071 | [#7][#6H0][#6H1]                       | 0.5491 |
| [#7H2][#6H0]                | 0.5746 | [#7X3H1]                               | 0.5723 |
| [cX3H1]([cX3H1])[cX3H0]     | 0.5189 | [#7][#6X3H0][#6X3H1]                   | 0.7222 |
| [#7][#6][#7]                | 0.4856 | [#6H1]                                 | 0.7804 |
| [#7][#6H0][#7]              | 0.4636 | [#6X3H1][#6X3H0]                       | 0.8527 |
| [#6H3][#6H0][#7H0][#6H0]    | 0.4243 | [#6H3][#6][#6X3]                       | 0.8563 |

---

Example 50 true smiles: CN(CCO)CCO formula: C5H13NO2  
Index of correct structure: 0 of 900  
True structure loss: 0.022324  
True structure:

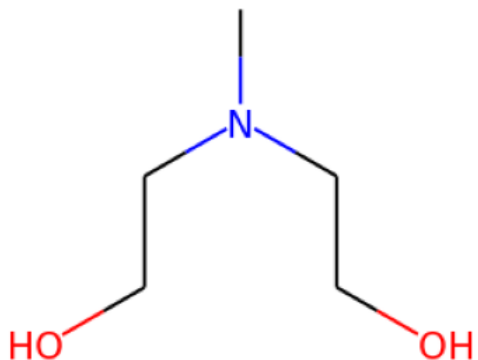

Experimental <sup>13</sup>C NMR (solvent: CDCl<sub>3</sub>)

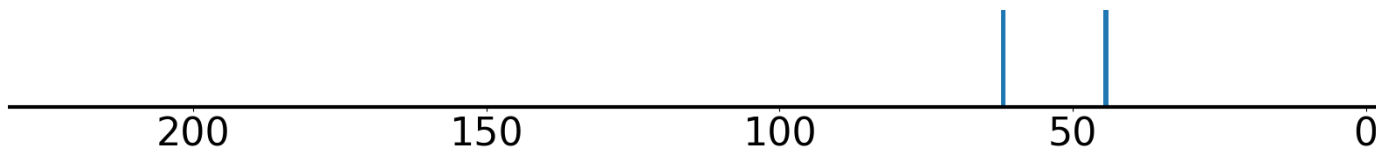

Experimental <sup>1</sup>H NMR (solvent: CDCl<sub>3</sub>)

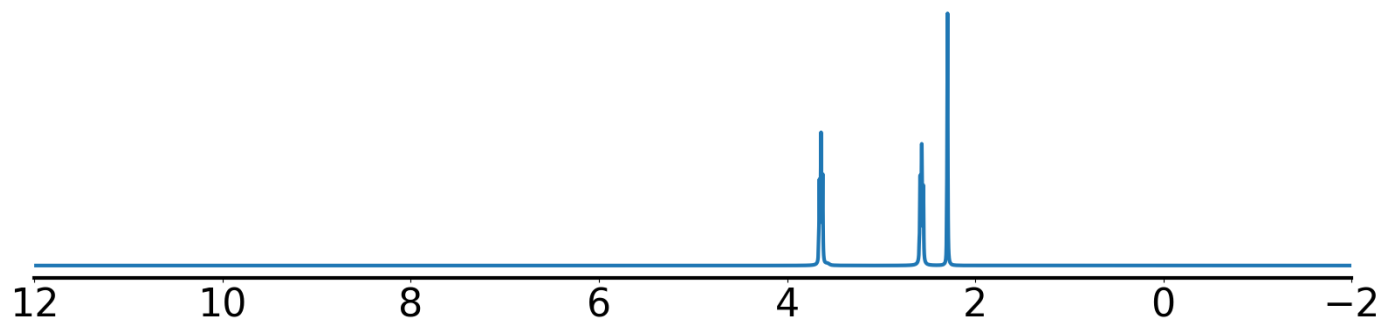

Top predicted structures (loss):

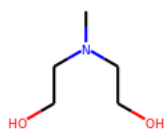

0.022324

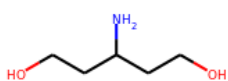

0.02863

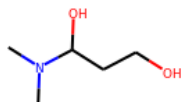

0.030825

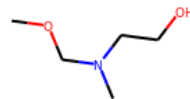

0.032305

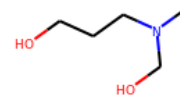

0.034111

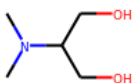

0.03543

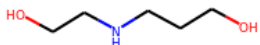

0.036206

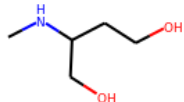

0.036376

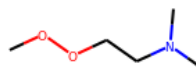

0.037714

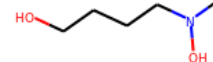

0.039016

|                             |        |                                   |        |
|-----------------------------|--------|-----------------------------------|--------|
| Top predicted substructures | prob   |                                   |        |
| [OX2H1]                     | 0.9936 | [CX4H2][CX4H2]                    | 0.7881 |
| [CX4H2]([#6])[O]            | 0.9526 | [CH2X4](O)[CX4H2]                 | 0.7026 |
| [#8][#6][#6H2]              | 0.946  | [#7X3][#6H3]                      | 0.6422 |
| [CX4H2]([#6])[#6]           | 0.894  | [CX4H3][NX3H0]                    | 0.6388 |
| [CX4H2]([OX2H1])[CX4H2]     | 0.8876 | [#6H3][#7]                        | 0.599  |
| best positives              | prob   | best negatives                    | prob   |
| [OX2H1]                     | 0.9936 | [CX2H1]#[CX2H0][CX3H1]=[CX3H0]    | 0.0    |
| [CX4H2]([#6])[O]            | 0.9526 | CC=CC#C                           | 0.0    |
| [#8][#6][#6H2]              | 0.946  | CCC=CC#C                          | 0.0    |
| [CX4H2]([OX2H1])[CX4H2]     | 0.8876 | [CX3H0](=[CX3H1])([CX4H2])[CX2H0] | 0.0    |
| [CX4H2][CX4H2]              | 0.7881 | CC=CCC#C                          | 0.0    |
| [CH2X4](O)[CX4H2]           | 0.7026 | [CX2H0](#[CX2H0])[CX3H0]          | 0.0    |
| [#7X3][#6H3]                | 0.6422 | C=CC=CC#C                         | 0.0    |
| [CX4H3][NX3H0]              | 0.6388 | CC#CCC=C                          | 0.0    |
| [#6H3][#7]                  | 0.599  | C=CCCC#C                          | 0.0    |
| [#7X3H0]                    | 0.5847 | [CX2H0](#[CX2H0])[CX2H0]          | 0.0    |
| worst negatives             | prob   | worst positives                   | prob   |
| [CX4H2]([#6])[#6]           | 0.894  | [#6H2][#7][#6H2]                  | 0.0747 |
| OCC[CH2]                    | 0.4944 | [#6H3][#7X3H0][#6X4H2][#6X4H2]    | 0.1001 |
| [#7X3H2]                    | 0.4723 | [CX4H2]([NX3H0])[CX4H2]           | 0.198  |
| [#6H1][#6H2]                | 0.4327 | [#6H3][#7][#6H2]                  | 0.2012 |
| [#6H1]                      | 0.4226 | [CX4H3]                           | 0.323  |
| [CX4H2](O)[CHX4]            | 0.2109 | [#7X3][#6H2]                      | 0.4452 |
| [#8H][#6H2][#6H1]           | 0.1621 | [#7][#6H2][#6H2]                  | 0.5133 |
| [#7H2][#6H2]                | 0.1594 | [#7][#6H2]                        | 0.5271 |
| [#6H1]([#6H2])[#6H2]        | 0.1485 | [#7X3H0]                          | 0.5847 |
| [CX4H2]([NX3H2])[CX4H2]     | 0.1362 | [#6H3][#7]                        | 0.599  |

---

Example 51 true smiles: CCC(N)C(=O)O formula: C4H9NO2  
 Index of correct structure: 0 of 896  
 True structure loss: 0.017196  
 True structure:

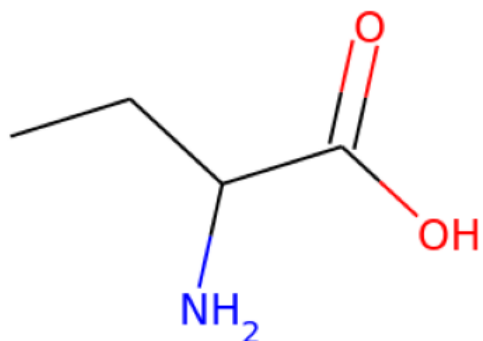

Experimental <sup>13</sup>C NMR (solvent: D2O)

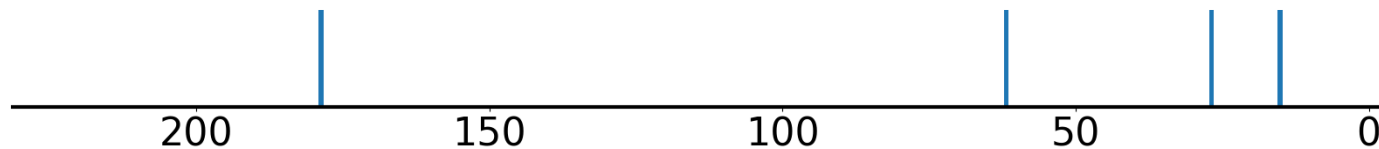

Experimental <sup>1</sup>H NMR (solvent: D2O)

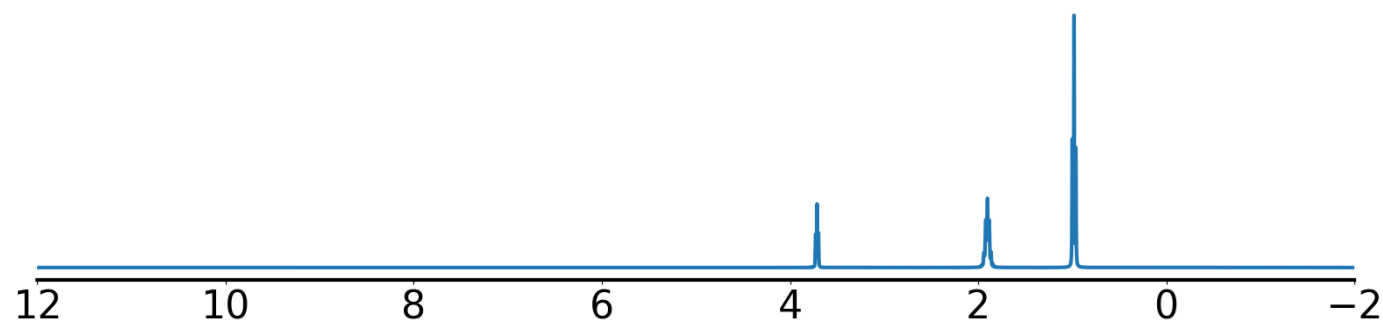

Top predicted structures (loss):

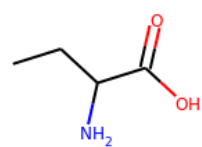

0.017196

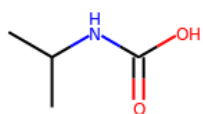

0.04451

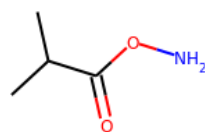

0.047569

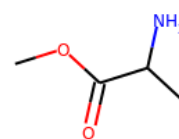

0.050225

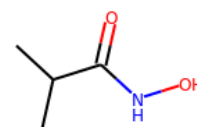

0.053337

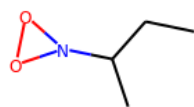

0.054463

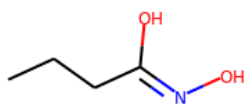

0.056389

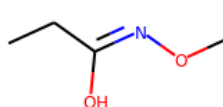

0.056797

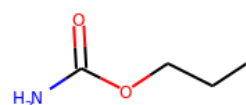

0.056952

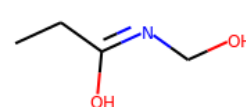

0.057627



| Top predicted substructures | prob   |                                   |        |
|-----------------------------|--------|-----------------------------------|--------|
| [CX4H3]                     | 0.9998 | [CX4H3][CX4H2]                    | 0.9439 |
| [#6H3][#6][#6]              | 0.9979 | [#7X3H2]                          | 0.9303 |
| [CX4H3][#6]                 | 0.9975 | [CX3](=O)[OX2H1]                  | 0.9061 |
| [CX3](=OX1)C                | 0.9834 | [#8]=[#6H0][#6H1]                 | 0.8742 |
| [OX2H1]                     | 0.9659 | [CX4H2]([CX4H3])[CX4H1]           | 0.8656 |
| best positives              | prob   | best negatives                    | prob   |
| [CX4H3]                     | 0.9998 | [CX2H1]#[CX2H0][CX3H1]=[CX3H0]    | 0.0    |
| [#6H3][#6][#6]              | 0.9979 | C=CC=CC#C                         | 0.0    |
| [CX4H3][#6]                 | 0.9975 | CC=CC#CC                          | 0.0    |
| [CX3](=OX1)C                | 0.9834 | CCC=CC#C                          | 0.0    |
| [OX2H1]                     | 0.9659 | C=CCCC#C                          | 0.0    |
| [CX4H3][CX4H2]              | 0.9439 | CC#CCC=C                          | 0.0    |
| [#7X3H2]                    | 0.9303 | [CX3H0](=[CX3H1])([OX2H0])[CX2H0] | 0.0    |
| [CX3](=O)[OX2H1]            | 0.9061 | CCC#CC#C                          | 0.0    |
| [#8]=[#6H0][#6H1]           | 0.8742 | [CX2H0](#[CX2H1])[CX4H2]          | 0.0    |
| [CX4H2]([CX4H3])[CX4H1]     | 0.8656 | [CX3H0](=[CX3H1])([CX4H2])[CX2H0] | 0.0    |
| worst negatives             | prob   | worst positives                   | prob   |
| [#8]=[#6][#6H1][#6H1]       | 0.4913 | OCC[CH2]                          | 0.0953 |
| [#7H2][#6H0]                | 0.4635 | [#6H3][#6H2][#6H1][#7]            | 0.3188 |
| [#7][#6H0][#6H1]            | 0.3145 | [CX4H1]([NX3H2])([CX4H2])[CX3H0]  | 0.3877 |
| [#8][#6][#6H2]              | 0.3131 | [#8][#6H0][#6H1]                  | 0.4438 |
| [#6H3][#6H1][#6H1][#7]      | 0.2994 | [#7H2][#6H1]                      | 0.4712 |
| [#6H3][#6][#6X3]            | 0.2758 | [CX4H2]([#6])[#6]                 | 0.5339 |
| [CH3]CC[OH]                 | 0.2624 | [#6H1][#6H2]                      | 0.6182 |
| [#7X3H1]                    | 0.2603 | [CX4H2]CC=O                       | 0.6784 |
| [OH][CX4H]                  | 0.2305 | [#7][#6][#6X3]                    | 0.6901 |
| [#6H1][#6H1]                | 0.1805 | [#6X3][#6][#6][#6H3]              | 0.7073 |

---

Example 52 true smiles: CC(CN)C(=O)O formula: C4H9NO2  
Index of correct structure: 0 of 896  
True structure loss: 0.016235  
True structure:

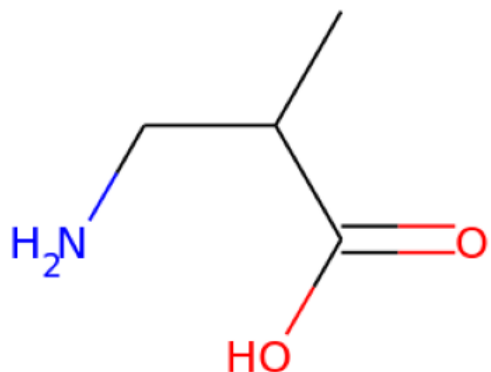

Experimental <sup>13</sup>C NMR (solvent: D<sub>2</sub>O)

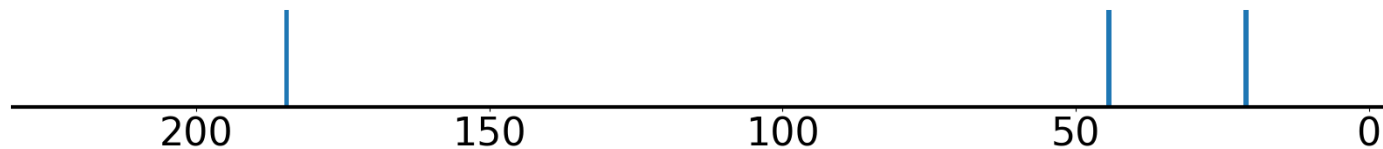

Experimental <sup>1</sup>H NMR (solvent: D<sub>2</sub>O)

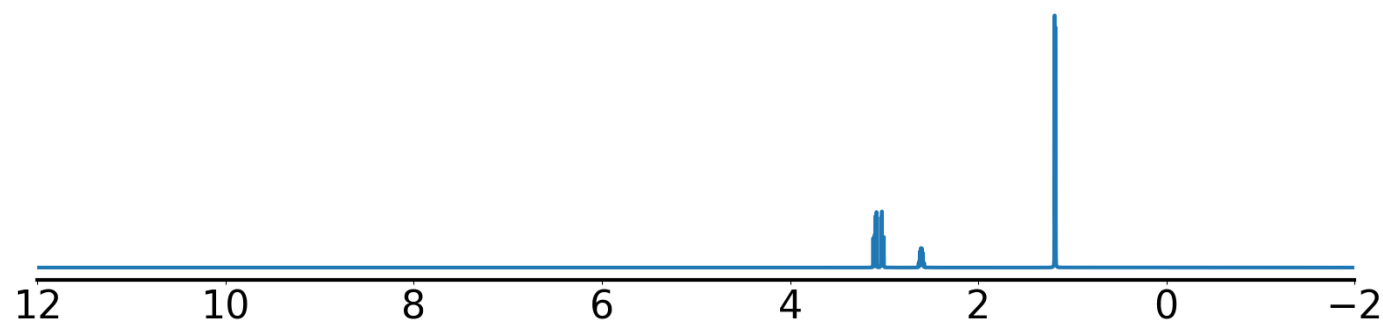

Top predicted structures (loss):

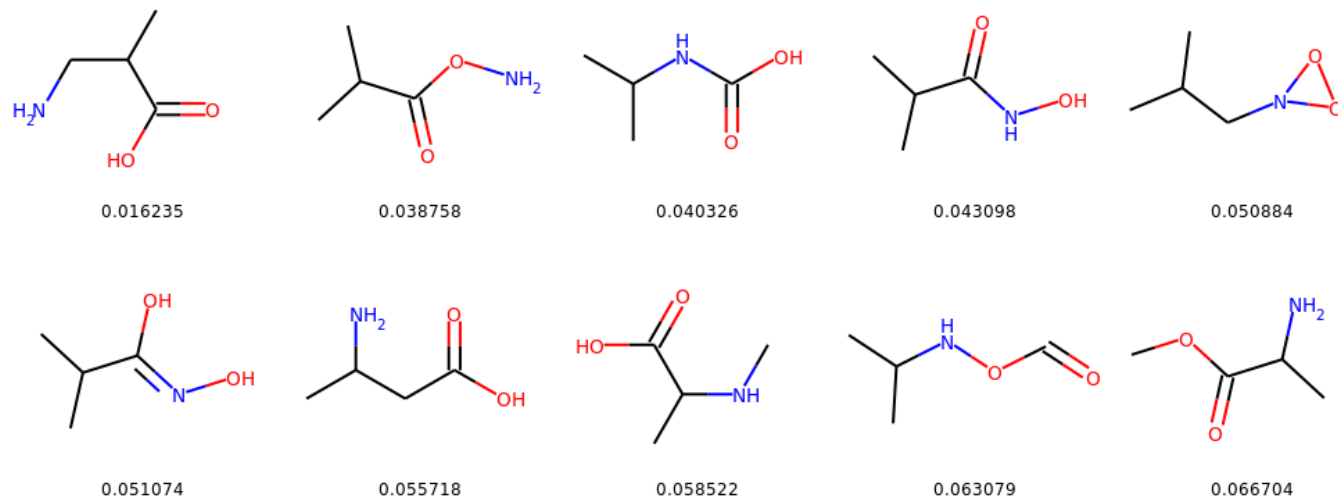

|                                   |        |                                        |        |
|-----------------------------------|--------|----------------------------------------|--------|
| Top predicted substructures       | prob   |                                        |        |
| [CX4H3]                           | 0.9997 | [OX2H1]                                | 0.9833 |
| [CX4H3][#6]                       | 0.9964 | [#7X3][#6H2]                           | 0.9574 |
| [#6H3][#6][#6]                    | 0.9962 | [#6H1]                                 | 0.9544 |
| [CX3](=[OX1])C                    | 0.9937 | [CX4H3][CX4H1]                         | 0.9209 |
| [CX3](=O)[OX2H1]                  | 0.9937 | [CX3H0](=[OX1H0])([OX2H1])[CX4H1]      | 0.9144 |
| best positives                    | prob   | best negatives                         | prob   |
| [CX4H3]                           | 0.9997 | [CX2H1]#[CX2H0][CX3H1]=[CX3H0]         | 0.0    |
| [CX4H3][#6]                       | 0.9964 | C=CC=CC#C                              | 0.0    |
| [#6H3][#6][#6]                    | 0.9962 | CC=CC#CC                               | 0.0    |
| [CX3](=[OX1])C                    | 0.9937 | CC=CCC#C                               | 0.0    |
| [CX3](=O)[OX2H1]                  | 0.9937 | CCC=CC#C                               | 0.0    |
| [OX2H1]                           | 0.9833 | CCC#CC#C                               | 0.0    |
| [#7X3][#6H2]                      | 0.9574 | [CX2H0](#[CX2H1])[CX3H0]               | 0.0    |
| [#6H1]                            | 0.9544 | [CX3H0](=[CX3H1])([CX4H2])[CX2H0]      | 0.0    |
| [CX4H3][CX4H1]                    | 0.9209 | [CX2H0](#[CX2H0])[CX2H0]               | 0.0    |
| [CX3H0](=[OX1H0])([OX2H1])[CX4H1] | 0.9144 | CC#CCC=C                               | 0.0    |
| worst negatives                   | prob   | worst positives                        | prob   |
| [#7][#6H0][#6H1]                  | 0.4055 | [OX1H0]=[CX3H0][CX4H1]([CX4H3])[CX4H2] | 0.2495 |
| [CX4H1]([CX4H3])([CX4H3])[CX3H0]  | 0.3462 | OCC[CH2]                               | 0.341  |
| [#7X3H1]                          | 0.3242 | [#7][#6][#6][#6X3]                     | 0.3596 |
| [#6X3][#6][#6][#6H3]              | 0.3115 | [CH3]CC[OH]                            | 0.3635 |
| [#7H2][#6H0]                      | 0.2364 | [CX4H2]([NX3H2])[CX4H1]                | 0.4049 |
| [CHX4]([CH3X4])[CH3X4]            | 0.2278 | [CX4H1]([CX4H3])([CX4H2])[CX3H0]       | 0.4461 |
| [#8]=[#6][#6H1][#6H1]             | 0.2174 | [#6H1][#6H2]                           | 0.5617 |
| [CX3H0](=[OX1H0])([OX2H1])[CX4H2] | 0.1888 | [#7][#6H2][#6H1]                       | 0.5643 |
| [CX4H2][CX3]=O                    | 0.1872 | [#7][#6H2]                             | 0.6809 |
| [#7][#6][#6H3]                    | 0.1307 | [CX4H2]CC=O                            | 0.6858 |

---

Example 53 true smiles: NCCCC(=O)O formula: C4H9NO2  
Index of correct structure: 0 of 896  
True structure loss: 0.009423  
True structure:

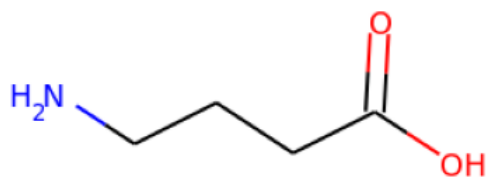

Experimental <sup>13</sup>C NMR (solvent: D<sub>2</sub>O)

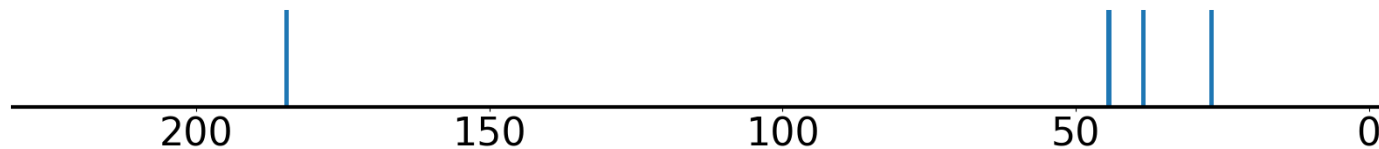

Experimental <sup>1</sup>H NMR (solvent: D<sub>2</sub>O)

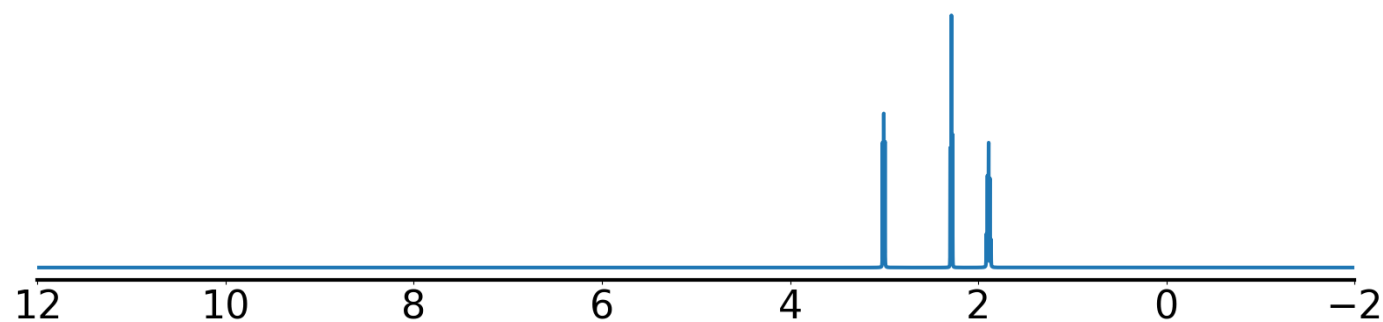

Top predicted structures (loss):

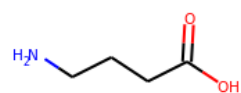

0.009423

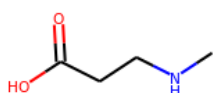

0.043282

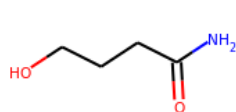

0.055838

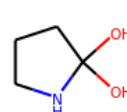

0.058892

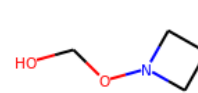

0.061202

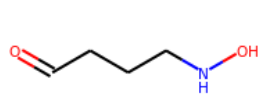

0.063165

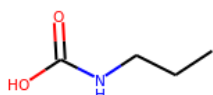

0.065322

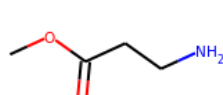

0.066907

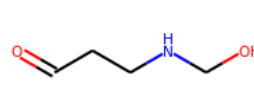

0.071745

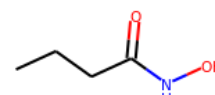

0.073503

|                                   |        |                                   |        |
|-----------------------------------|--------|-----------------------------------|--------|
| Top predicted substructures       | prob   |                                   |        |
| [CX3](=[OX1])C                    | 0.9973 | [#7X3][#6H2]                      | 0.9482 |
| [CX4H2]([#6])[#6]                 | 0.997  | [CX4H2]CC=O                       | 0.9318 |
| [OX2H1]                           | 0.9952 | [CX4H2][CX4H2]                    | 0.924  |
| [CX3](=O)[OX2H1]                  | 0.9919 | [#7][#6H2][#6H2]                  | 0.9218 |
| [#7][#6H2]                        | 0.965  | O=[CX3H0][CX4H2][CX4H2]           | 0.8961 |
| best positives                    | prob   | best negatives                    | prob   |
| [CX3](=[OX1])C                    | 0.9973 | CCC=CC#C                          | 0.0    |
| [CX4H2]([#6])[#6]                 | 0.997  | [CX2H0](#[CX2H1])[CX3H0]          | 0.0    |
| [OX2H1]                           | 0.9952 | CC=CC#CC                          | 0.0    |
| [CX3](=O)[OX2H1]                  | 0.9919 | C=CC=CC#C                         | 0.0    |
| [#7][#6H2]                        | 0.965  | [CX2H1]#[CX2H0][CX3H1]=[CX3H0]    | 0.0    |
| [#7X3][#6H2]                      | 0.9482 | [CX3H0](=[CX3H1])([OX2H0])[CX2H0] | 0.0    |
| [CX4H2]CC=O                       | 0.9318 | CCC#CC#C                          | 0.0    |
| [CX4H2][CX4H2]                    | 0.924  | [CX2H0](#[CX2H0])[CX2H0]          | 0.0    |
| [#7][#6H2][#6H2]                  | 0.9218 | CC=CCC#C                          | 0.0    |
| O=[CX3H0][CX4H2][CX4H2]           | 0.8961 | [CX3H1](=[CX3H1])[CX2H0]          | 0.0    |
| worst negatives                   | prob   | worst positives                   | prob   |
| [#7X3H1]                          | 0.2593 | [OX1H0]=[CX3H0]([#8])[CX4H2]      | 0.2647 |
| [#7H2][#6H0]                      | 0.2362 | [#8][#6][#6H2]                    | 0.2824 |
| [CX4H2][CX4H2][CX4H2][CX4H2]      | 0.2338 | [CX4H2]([NX3H2])[CX4H2]           | 0.7698 |
| [#6H2][#7][#6X3]                  | 0.2223 | OCC[CH2]                          | 0.7986 |
| [CX3H0](=[OX1H0])([OX2H1])[CX4H1] | 0.2156 | [#7H2][#6H2]                      | 0.8096 |
| [#8]=[#6H0][#6H1]                 | 0.2037 | [#8]=[#6][#8]                     | 0.8098 |
| [#8][#6H0][#6H1]                  | 0.156  | [CX4H2][CX3]=O                    | 0.8196 |
| [#6H1][#6H2]                      | 0.1536 | [CX4H2]([CX4H2])[CX4H2]           | 0.8248 |
| [#6H1]                            | 0.143  | [CX3H0](=[OX1H0])([OX2H1])[CX4H2] | 0.839  |
| [CX4H2]([NX3H1])[CX4H2]           | 0.1223 | [CX4H2]([CX4H2])[CX3H0]           | 0.8477 |

---

Example 54 true smiles: OC1CCNCC1 formula: C5H11NO  
Index of correct structure: 0 of 864  
True structure loss: 0.021376  
True structure:

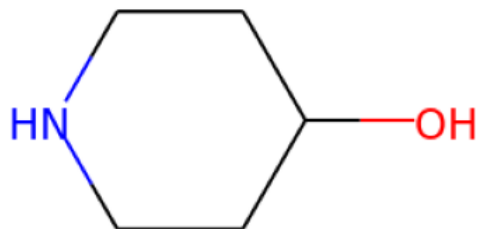

Experimental <sup>13</sup>C NMR (solvent: CDCl<sub>3</sub>)

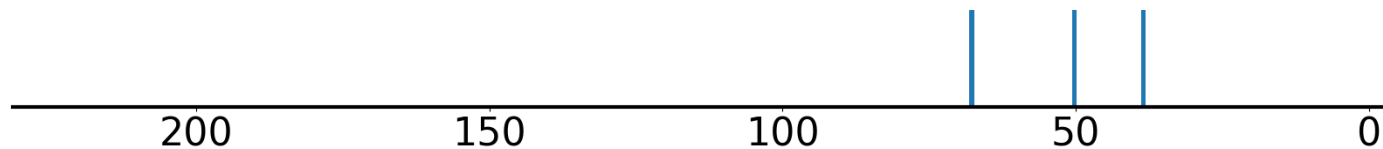

Experimental <sup>1</sup>H NMR (solvent: CDCl<sub>3</sub>)

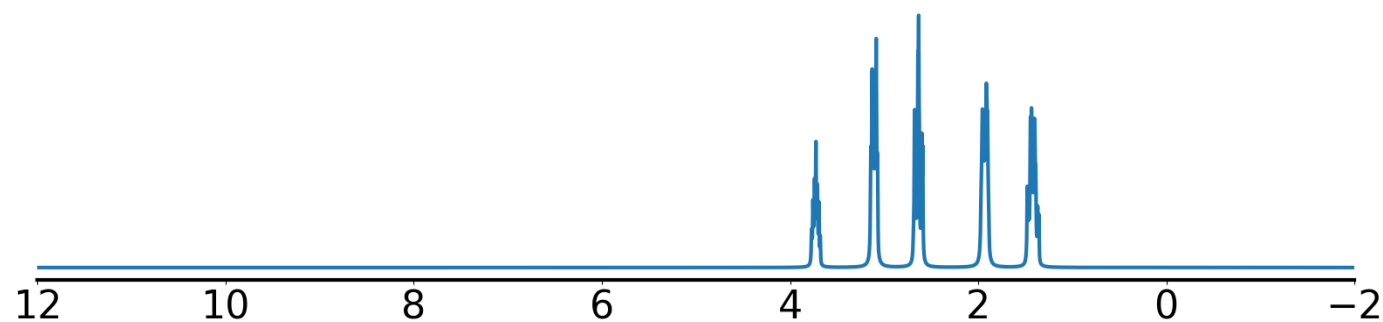

Top predicted structures (loss):

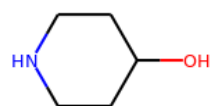

0.021376

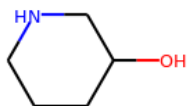

0.028397

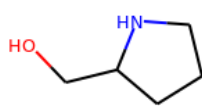

0.029413

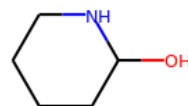

0.031179

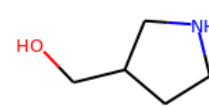

0.031396

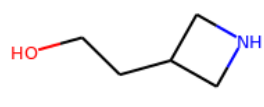

0.038322

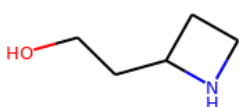

0.039979

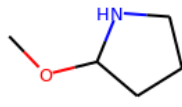

0.044659

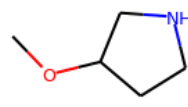

0.045066

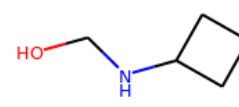

0.047455

|                             |        |                                  |        |
|-----------------------------|--------|----------------------------------|--------|
| Top predicted substructures | prob   |                                  |        |
| [CX4H2]([#6])[#6]           | 0.9987 | [#6H1][#6H2]                     | 0.9545 |
| [#6H1]                      | 0.9816 | OCC[CH2]                         | 0.9274 |
| [#7][#6H2]                  | 0.965  | [OX2H1]                          | 0.9168 |
| [#7X3][#6H2]                | 0.9622 | [CX4H2][CX4H2]                   | 0.8776 |
| [CX4H2]([CX4H2])[CX4H1]     | 0.9592 | [#6H1]([#6H2])[#6H2]             | 0.8672 |
| best positives              | prob   | best negatives                   | prob   |
| [CX4H2]([#6])[#6]           | 0.9987 | [CX2H1]#[CX2H0][CX3H1]=[CX3H0]   | 0.0    |
| [#6H1]                      | 0.9816 | C=CC=CC#C                        | 0.0    |
| [#7][#6H2]                  | 0.965  | [CX2H0]([CX2H1])[cX3H0]          | 0.0    |
| [#7X3][#6H2]                | 0.9622 | C=CCCC#C                         | 0.0    |
| [CX4H2]([CX4H2])[CX4H1]     | 0.9592 | CC#CCC=C                         | 0.0    |
| [#6H1][#6H2]                | 0.9545 | [CX3H0]([CX3H1]([CX4H2])[CX2H0]) | 0.0    |
| OCC[CH2]                    | 0.9274 | [CX3H0]([CX3H1]([OX2H0])[CX2H0]) | 0.0    |
| [OX2H1]                     | 0.9168 | CCC#CC=C                         | 0.0    |
| [CX4H2][CX4H2]              | 0.8776 | [CX3H0]([CX3H2]([CX4H3])[CX4H0]) | 0.0    |
| [#6H1]([#6H2])[#6H2]        | 0.8672 | CC=CC#CC                         | 0.0    |
| worst negatives             | prob   | worst positives                  | prob   |
| [CX4H2]([CX4H1])[CX4H1]     | 0.6905 | [OH][CX4H]                       | 0.251  |
| [#7X3H2]                    | 0.5904 | [CX4H1]([OX2H1]([CX4H2])[CX4H2]) | 0.3287 |
| [#6H1][#6H2][#6][#6][#7]    | 0.5554 | [#7X3H1]                         | 0.3429 |
| [CX4H2]([CH])[CH]           | 0.5415 | [#6X4H2][#6H1][#8H]              | 0.3631 |
| [CX4H2](O)[CHX4]            | 0.4818 | [#6H2][#7][#6H2]                 | 0.4152 |
| [CX4H2]([#6])[O]            | 0.4503 | O[CX4H][CX4H2]                   | 0.4281 |
| [CH2X4](O)[CX4H2]           | 0.3133 | [#6]1[#6][#6][#6][#7]1           | 0.4324 |
| CCCCC                       | 0.2891 | [CX4H]O                          | 0.5077 |
| [CX4H2]([OX2H1])[CX4H1]     | 0.2804 | [#7][#6H2][#6H2][#6H1]           | 0.6804 |
| [#7][#6H1][#6H2r5]          | 0.279  | [#8][#6][#6H2]                   | 0.7243 |

---

Example 55 true smiles: COc1ccccc1 formula: C7H8O  
Index of correct structure: 0 of 746  
True structure loss: 0.003697  
True structure:

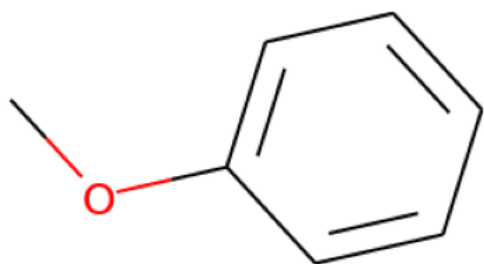

Experimental <sup>13</sup>C NMR (solvent: CDCl<sub>3</sub>)

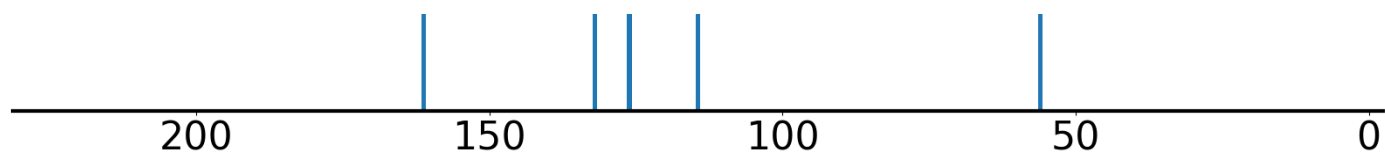

Experimental <sup>1</sup>H NMR (solvent: CDCl<sub>3</sub>)

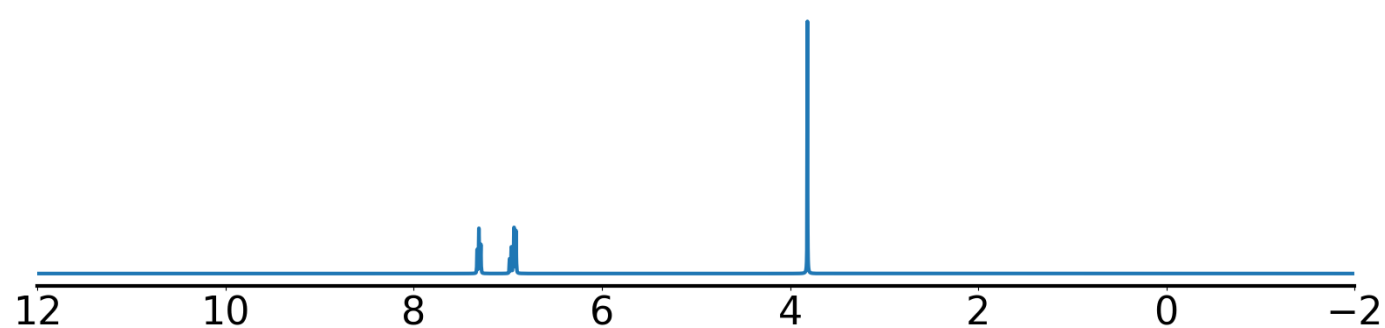

Top predicted structures (loss):

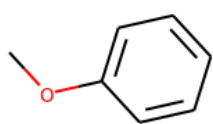

0.003696

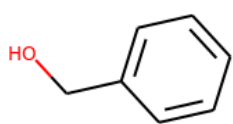

0.037556

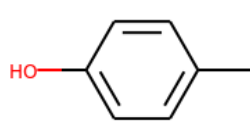

0.064552

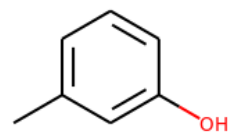

0.072269

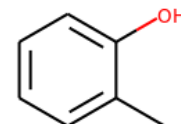

0.072973

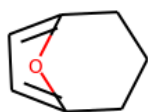

0.079819

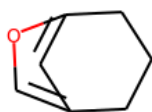

0.0904

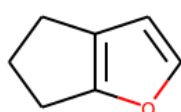

0.097002

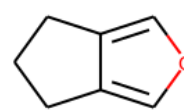

0.105886

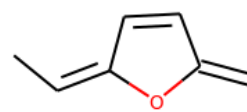

0.107218



|                              |        |                                           |        |
|------------------------------|--------|-------------------------------------------|--------|
| Top predicted substructures  | prob   |                                           |        |
| [#6H1]                       | 0.9993 | [#6X3H1][#6X3H0]                          | 0.9821 |
| [#6X3][#6X3]                 | 0.9976 | [cX3H1]([cX3H1])[cX3H0]                   | 0.9807 |
| [cH][cH]                     | 0.997  | [cX3H1]([cX3H1])[cX3H1]                   | 0.9614 |
| [#6X3][#6X3][#6X3][#6X3]     | 0.993  | [#6H1][#6H1]                              | 0.9596 |
| [cH]                         | 0.9897 | [CX4H3][OX2H0]                            | 0.957  |
| best positives               | prob   | best negatives                            | prob   |
| [#6H1]                       | 0.9993 | [CX4H0]([NX3H1])([CX4H3])([CX4H2])[CX4H1] | 0.0    |
| [#6X3][#6X3]                 | 0.9976 | [#8][#6H1][#6H2][#6H1]=[#8]               | 0.0    |
| [cH][cH]                     | 0.997  | [OX2H0]1[CX4H2][CX4H2][CX4H1][CX4H1]1     | 0.0    |
| [#6X3][#6X3][#6X3][#6X3]     | 0.993  | [CX4H1]([NX3H2])([CX4H2])[CX3H1]          | 0.0    |
| [cH]                         | 0.9897 | [OX2H0][CX4H2][CX4H2][CX4H1][OX2H0]       | 0.0    |
| [#6X3H1][#6X3H0]             | 0.9821 | [CX3H0]=[CX3H2]([CX4H3])[CX4H0]           | 0.0    |
| [cX3H1]([cX3H1])[cX3H0]      | 0.9807 | [OX2H0]1[CX4H2][CX4H1][CX4H1]1            | 0.0    |
| [cX3H1]([cX3H1])[cX3H1]      | 0.9614 | [CX4H0]([OX2H0])([CX4H3])([CX4H2])[CX4H1] | 0.0    |
| [#6H1][#6H1]                 | 0.9596 | [CX4H0]([OX2H1])([CX4H3])([CX4H2])[CX4H1] | 0.0    |
| [CX4H3][OX2H0]               | 0.957  | [CX4H1]([OX2H1])([CX4H1])[CX2H0]          | 0.0    |
| worst negatives              | prob   | worst positives                           | prob   |
| [cX3H1]([cX3H0])[cX3H0]      | 0.1857 | [#6X3H1][#6X3H1][#6X3H0][#6X3H1]          | 0.7749 |
| [OX2H1]                      | 0.1733 | [cH]cO                                    | 0.8451 |
| [CHX3]=[CHX3]                | 0.1605 | [#8][#6][#6][#6X3]                        | 0.8911 |
| [OX2H][cX3]:[c]              | 0.1251 | [#6]1[#6][#6][#6][#6]1                    | 0.9259 |
| [#6X3][#6H2][#6X3]           | 0.1188 | [CX4H3]                                   | 0.9492 |
| [cX3H0][cX3H1][cX3H1][cX3H0] | 0.1176 | [#8][#6H0][#6H1]                          | 0.9498 |
| o[cH]                        | 0.0994 | [CX4H3][OX2H0]                            | 0.957  |
| [#7][#6][#6][#6X3]           | 0.0954 | [#6H1][#6H1]                              | 0.9596 |
| [#8][#6H][#6X3][#6X3H]       | 0.0951 | [cX3H1]([cX3H1])[cX3H1]                   | 0.9614 |
| [#6]1[#6][#6][#6][#6][#7]1   | 0.0944 | [cX3H1]([cX3H1])[cX3H0]                   | 0.9807 |

---

Example 56 true smiles: c1ccc2occc2c1 formula: C8H6O  
Index of correct structure: 0 of 720  
True structure loss: 0.009984  
True structure:

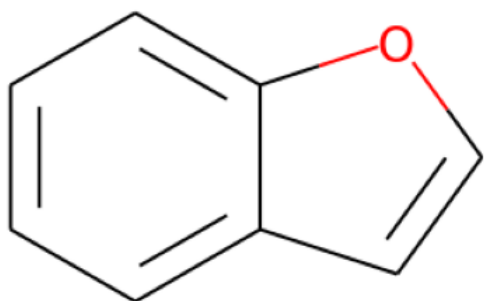

Experimental <sup>13</sup>C NMR (solvent: CDCl<sub>3</sub>)

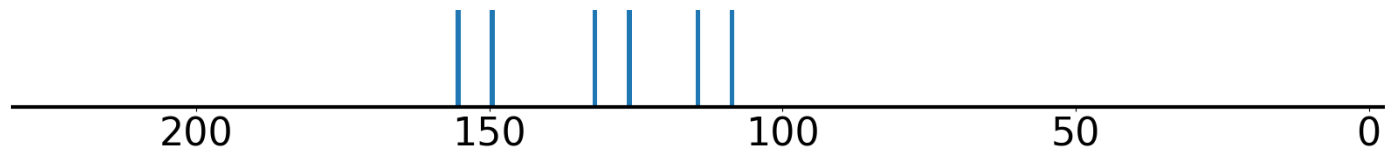

Experimental <sup>1</sup>H NMR (solvent: CD<sub>3</sub>OD)

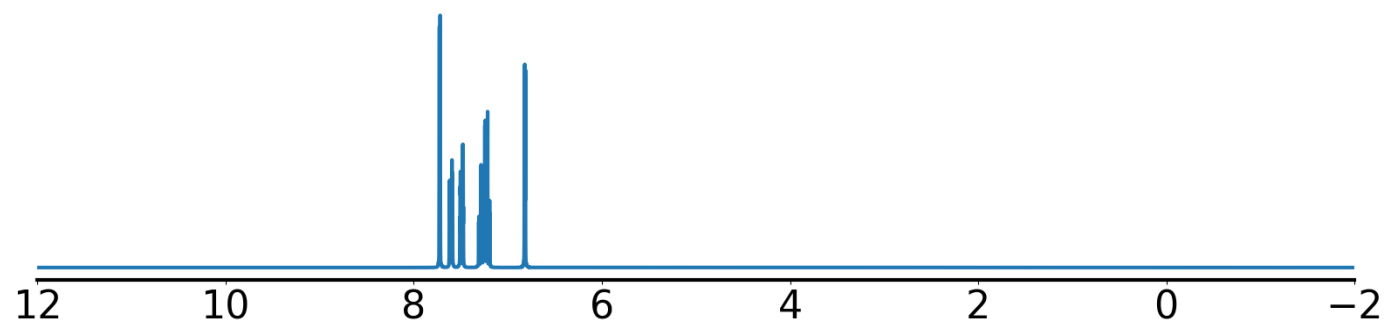

Top predicted structures (loss):

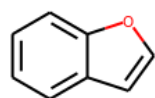

0.009984

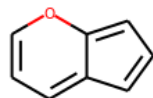

0.018026

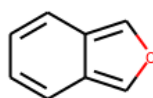

0.024484

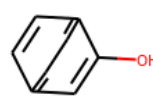

0.025727

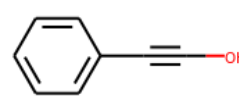

0.031534

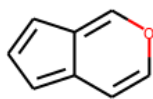

0.038981

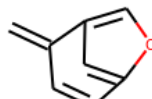

0.039189

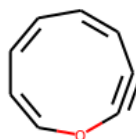

0.039479

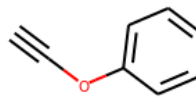

0.040704

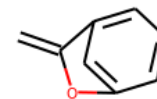

0.042596

|                                  |        |                                           |        |
|----------------------------------|--------|-------------------------------------------|--------|
| Top predicted substructures      | prob   |                                           |        |
| [#6H1]                           | 1.0    | [#6X3H1][#6X3H0]                          | 0.9984 |
| [#6X3][#6X3]                     | 1.0    | [cX3H1]([cX3H1])[cX3H0]                   | 0.9965 |
| [#6X3][#6X3][#6X3][#6X3]         | 0.9999 | [#8][#6][#6][#6X3]                        | 0.9941 |
| [cH][cH]                         | 0.9998 | [#6]1[#6][#6][#6][#6]1                    | 0.9864 |
| [cH]                             | 0.9993 | [#6H1][#6H1]                              | 0.9846 |
| best positives                   | prob   | best negatives                            | prob   |
| [#6H1]                           | 1.0    | [CX4H0]([NX3H1])([CX4H3])([CX4H2])[CX4H1] | 0.0    |
| [#6X3][#6X3]                     | 1.0    | [CX4H1]([NX3H2])([CX4H2])[CX3H1]          | 0.0    |
| [#6X3][#6X3][#6X3][#6X3]         | 0.9999 | [OX2H0]1[CX4H2][CX4H2][CX4H1][CX4H1]1     | 0.0    |
| [cH][cH]                         | 0.9998 | [#6H3][#6H0][#7][#6H3]                    | 0.0    |
| [cH]                             | 0.9993 | [#8][#6H1][#6H2][#6H1]=[#8]               | 0.0    |
| [#6X3H1][#6X3H0]                 | 0.9984 | [OX2H0][CX4H2][CX4H1]([CX4H1])[CX4H3]     | 0.0    |
| [cX3H1]([cX3H1])[cX3H0]          | 0.9965 | [CX4H0]([OX2H0])([CX4H3])([CX4H2])[CX4H1] | 0.0    |
| [#8][#6][#6][#6X3]               | 0.9941 | [CX3H0]([NX2H0])([CX4H2])[CX4H1]          | 0.0    |
| [#6]1[#6][#6][#6][#6]1           | 0.9864 | [CX4H1]([OX2H1])([CX4H2])[CX2H0]          | 0.0    |
| [#6H1][#6H1]                     | 0.9846 | [CX3H0]([CX3H2])([CX4H3])[CX4H0]          | 0.0    |
| worst negatives                  | prob   | worst positives                           | prob   |
| [cH]cO                           | 0.4025 | [#8X2H0][#6X3H1][#6X3H1][#6X3H0]          | 0.0043 |
| [#8][#6H][#6X3][#6X3H]           | 0.3014 | o[cH]                                     | 0.5279 |
| [CX3H1]([CX3H1])[cX3H0]          | 0.2094 | [cX3H1]([oX2H0])[cX3H1]                   | 0.8105 |
| [OX2H][cX3]:[c]                  | 0.1867 | [#6X3H1][#6X3H1][#6X3H0][#6X3H1]          | 0.9165 |
| [OX2H1]                          | 0.1525 | [#8][#6H1][#6H1]                          | 0.9167 |
| O=[#6][#6][#6X3]                 | 0.1486 | [#8][#6H0][#6H1]                          | 0.9476 |
| [#7][#6][#6][#6X3]               | 0.1267 | [cX3H1]([cX3H1])[cX3H1]                   | 0.9641 |
| [cX3H1]([cX3H0])[cX3H0]          | 0.0995 | [#6H1][#6H1]                              | 0.9846 |
| [cX3H0]([cX3H1])([cX3H0])[OX2H1] | 0.0879 | [#6]1[#6][#6][#6][#6]1                    | 0.9864 |
| [#7][#6X3H0][#6X3H1]             | 0.0867 | [#8][#6][#6][#6X3]                        | 0.9941 |

---

Example 57 true smiles: Oc1ccccc1O formula: C6H6O2  
Index of correct structure: 0 of 711  
True structure loss: 0.009254  
True structure:

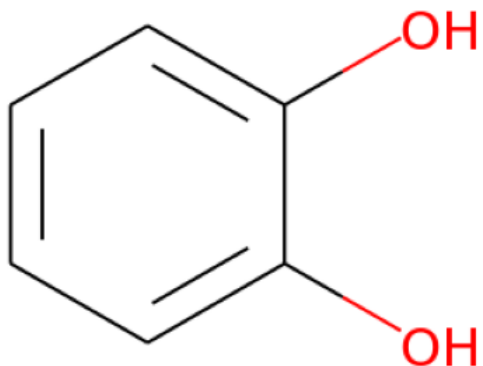

Experimental <sup>13</sup>C NMR (solvent: CDCl<sub>3</sub>)

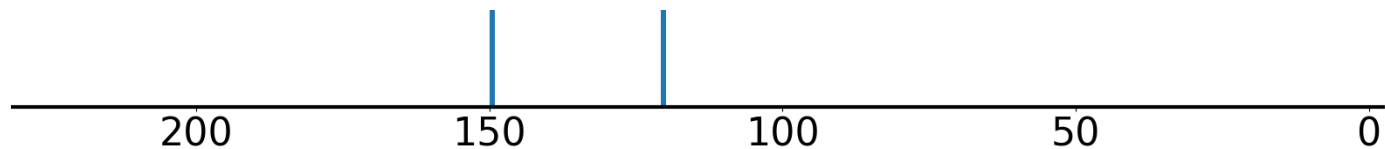

Experimental <sup>1</sup>H NMR (solvent: D<sub>2</sub>O)

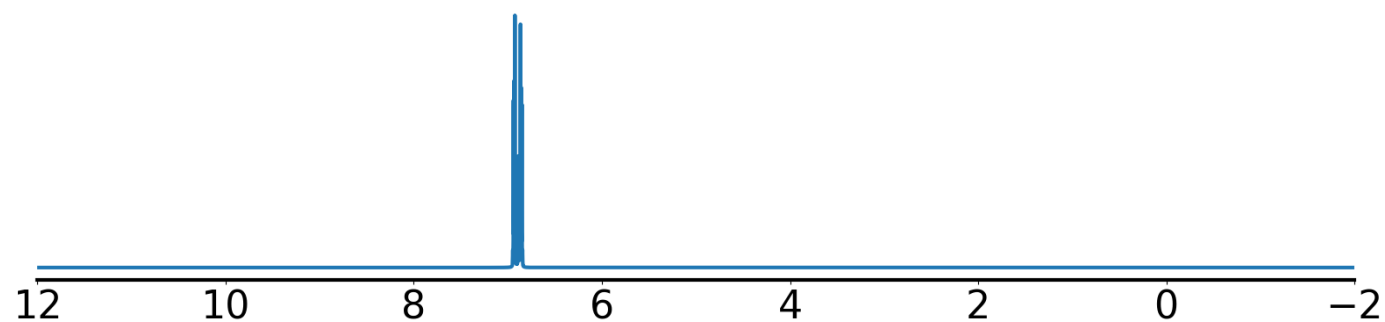

Top predicted structures (loss):

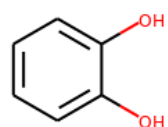

0.009254

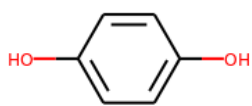

0.011482

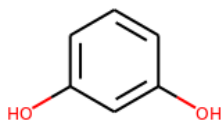

0.012204

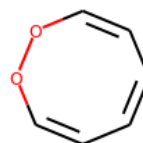

0.025279

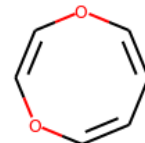

0.033056

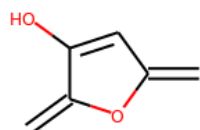

0.051641

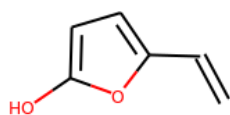

0.054744

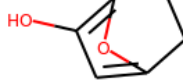

0.063618

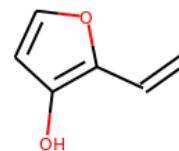

0.065229

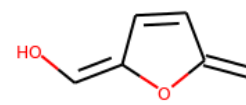

0.065689

|                                  |        |                                           |        |
|----------------------------------|--------|-------------------------------------------|--------|
| Top predicted substructures      | prob   |                                           |        |
| [#6X3][#6X3][#6X3][#6X3]         | 0.9893 | [cX3H1]([cX3H1])[cX3H0]                   | 0.9235 |
| [#6H1]                           | 0.9874 | [#6]1[#6][#6][#6][#6]1                    | 0.909  |
| [#6X3][#6X3]                     | 0.9862 | [#6H1][#6H1]                              | 0.8754 |
| [cH][cH]                         | 0.9844 | [#6X3H1][#6X3H0]                          | 0.8687 |
| [cH]                             | 0.9352 | [#8][#6][#6][#6X3]                        | 0.8469 |
| best positives                   | prob   | best negatives                            | prob   |
| [#6X3][#6X3][#6X3][#6X3]         | 0.9893 | [CX4H1]([NX3H1])([CX4H3])[CX4H2]          | 0.0    |
| [#6H1]                           | 0.9874 | [CX4H2]([NX3H0])[CX4H3]                   | 0.0    |
| [#6X3][#6X3]                     | 0.9862 | [CX4H0]([NX3H1])([CX4H3])([CX4H2])[CX4H1] | 0.0    |
| [cH][cH]                         | 0.9844 | [#6H3][#6H1][#7][#7]                      | 0.0    |
| [cH]                             | 0.9352 | [CX4H1]([NX3H2])([CX4H2])[CX3H1]          | 0.0    |
| [cX3H1]([cX3H1])[cX3H0]          | 0.9235 | [CX4H2]([NX2H0])[CX4H1]                   | 0.0    |
| [#6]1[#6][#6][#6][#6]1           | 0.909  | [#6H3][#7][#6X4H1][#6H3]                  | 0.0    |
| [#6H1][#6H1]                     | 0.8754 | [CX4H0]([NX3H1])([CX4H2])([CX4H2])[CX4H1] | 0.0    |
| [#6X3H1][#6X3H0]                 | 0.8687 | [OX1H0]=[CX3H0]1[CX4H1][CX4H1][CX4H2]1    | 0.0    |
| [#8][#6][#6][#6X3]               | 0.8469 | [OX2H0]1[CX4H2][CX4H2][CX4H1][CX4H1]1     | 0.0    |
| worst negatives                  | prob   | worst positives                           | prob   |
| [cX3H0][cX3H1][cX3H1][cX3H0]     | 0.4666 | [#8][#6][#6][#8]                          | 0.2663 |
| [#6X3H1][#6X3H1][#6X3H0][#6X3H1] | 0.4178 | [cX3H0]([cX3H1])([cX3H0])[OX2H1]          | 0.2837 |
| [#8]=[#6][#8]                    | 0.279  | [OX2H1]                                   | 0.5629 |
| [cX3H1]([oX2H0])[cX3H1]          | 0.2249 | [#8][#6H0][#6H1]                          | 0.7258 |
| [cX3H0][cX3H1][cX3H0][OX2H1]     | 0.1995 | [cX3H1]([cX3H1])[cX3H1]                   | 0.7509 |
| [#8][#6H1][#6H1]                 | 0.1495 | [cH]cO                                    | 0.7681 |
| [#8][#6H][#6X3][#6X3H]           | 0.1359 | [OX2H][cX3]:[c]                           | 0.7851 |
| o[cH]                            | 0.1142 | [#8][#6][#6][#6X3]                        | 0.8469 |
| [CX3](=[OX1])O                   | 0.1097 | [#6X3H1][#6X3H0]                          | 0.8687 |
| [#8][#6][#6]=[#6][#6][#8]        | 0.0986 | [#6H1][#6H1]                              | 0.8754 |

---

Example 58 true smiles: Oc1ccc(O)cc1 formula: C6H6O2  
Index of correct structure: 1 of 711  
True structure loss: 0.016357  
True structure:

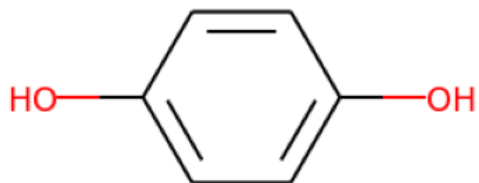

Experimental <sup>13</sup>C NMR (solvent: DMSO)

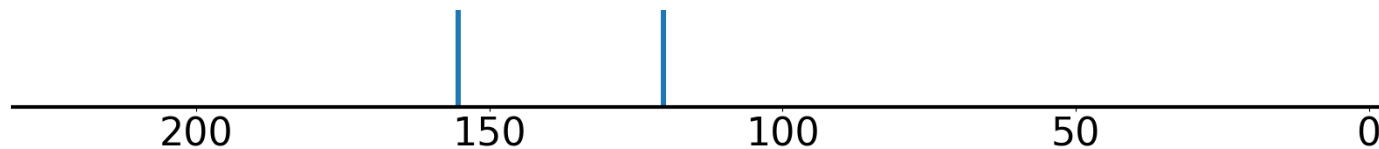

Experimental <sup>1</sup>H NMR (solvent: D2O)

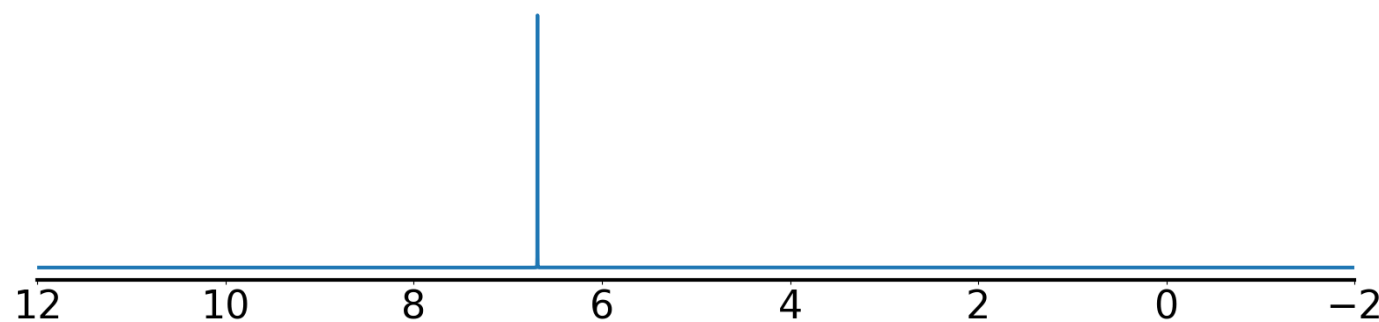

Top predicted structures (loss):

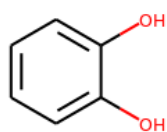

0.01542

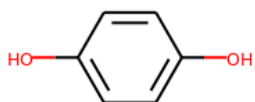

0.016357

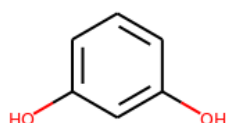

0.0206

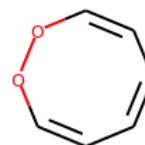

0.028024

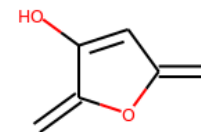

0.033216

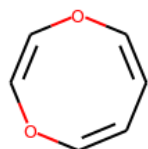

0.034636

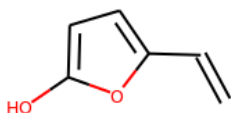

0.040065

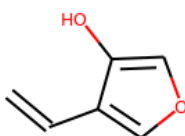

0.0441

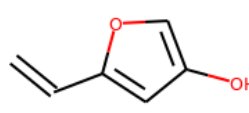

0.046645

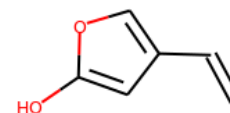

0.046909

|                                  |        |                                           |        |
|----------------------------------|--------|-------------------------------------------|--------|
| Top predicted substructures      | prob   |                                           |        |
| [#6X3][#6X3]                     | 0.9921 | [#8][#6][#6][#6X3]                        | 0.8189 |
| [#6H1]                           | 0.9795 | [OX2H][cX3]:[c]                           | 0.684  |
| [#6X3H1][#6X3H0]                 | 0.9261 | [#8][#6H0][#6H1]                          | 0.6508 |
| [cH]                             | 0.9199 | [#6]1[#6][#6][#6][#6]1                    | 0.6291 |
| [#6X3][#6X3][#6X3][#6X3]         | 0.8914 | [cH]cO                                    | 0.6013 |
| best positives                   | prob   | best negatives                            | prob   |
| [#6X3][#6X3]                     | 0.9921 | [OX1H0]=[CX3H0]1[CX4H1][CX4H1][CX4H2]1    | 0.0    |
| [#6H1]                           | 0.9795 | [CX4H0]([NX3H1])([CX4H3])([CX4H2])[CX4H1] | 0.0    |
| [#6X3H1][#6X3H0]                 | 0.9261 | [CX4H1]([NX3H1])([CX4H3])[CX4H2]          | 0.0    |
| [cH]                             | 0.9199 | [#6H3][#7][#6X4H1][#6H3]                  | 0.0    |
| [#6X3][#6X3][#6X3][#6X3]         | 0.8914 | [CX4H1]([NX3H2])([CX4H3])[CX4H1]          | 0.0    |
| [#8][#6][#6][#6X3]               | 0.8189 | [#6H3][#6H1][#6H1]=[#7]                   | 0.0    |
| [OX2H][cX3]:[c]                  | 0.684  | [CX4H1]([NX3H2])([CX4H2])[CX3H1]          | 0.0    |
| [#8][#6H0][#6H1]                 | 0.6508 | [CX4H1]([NX3H0])([CX4H3])[CX4H1]          | 0.0    |
| [#6]1[#6][#6][#6][#6][#6]1       | 0.6291 | [CX4H1]([NX3H0])([CX4H2])[CX4H1]          | 0.0    |
| [cH]cO                           | 0.6013 | [CX4H0]([OX2H1])([CX4H3])([CX4H2])[CX4H1] | 0.0    |
| worst negatives                  | prob   | worst positives                           | prob   |
| [#8][#6][#6][#8]                 | 0.4815 | [#8][#6][#6][#6][#6][#8]                  | 0.058  |
| [#8]=[#6][#8]                    | 0.3829 | [#6X3H1][#6X3H1][#6X3H0][#6X3H1]          | 0.1692 |
| [cX3H0]([cX3H1])([cX3H0])[OX2H1] | 0.3032 | [cX3H1]([cX3H1])[cX3H0]                   | 0.3135 |
| o[cH]                            | 0.1606 | [#6H1][#6H1]                              | 0.3433 |
| [#6X3][#6X3][#6X3]=[#6X3]        | 0.1585 | [OX2H1]                                   | 0.3669 |
| [cX3H1]([cX3H0])[cX3H0]          | 0.1568 | [cX3H0][cX3H1][cX3H1][cX3H0]              | 0.5317 |
| [CHX3]=[CHX3]                    | 0.1235 | [cH][cH]                                  | 0.5336 |
| [CX3]([OX1])O                    | 0.1145 | [cH]cO                                    | 0.6013 |
| O=[#6][#6][#6X3]                 | 0.0989 | [#6]1[#6][#6][#6][#6][#6]1                | 0.6291 |
| [cX3H1]([OX2H0])[cX3H1]          | 0.0826 | [#8][#6H0][#6H1]                          | 0.6508 |

---

Example 59 true smiles: O=C(O)CCC(=O)O formula: C4H6O4  
 Index of correct structure: 0 of 502  
 True structure loss: 0.031774  
 True structure:

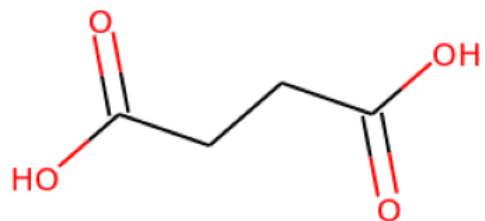

Experimental <sup>13</sup>C NMR (solvent: D<sub>2</sub>O)

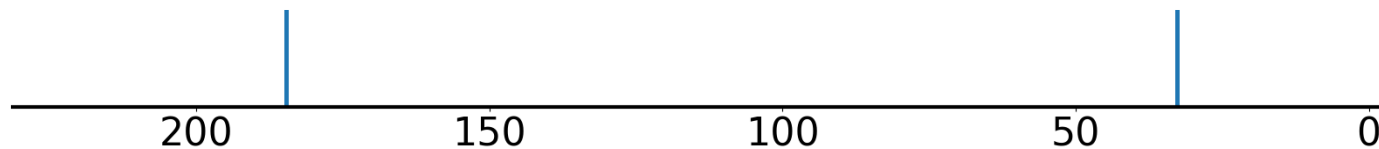

Experimental <sup>1</sup>H NMR (solvent: D<sub>2</sub>O)

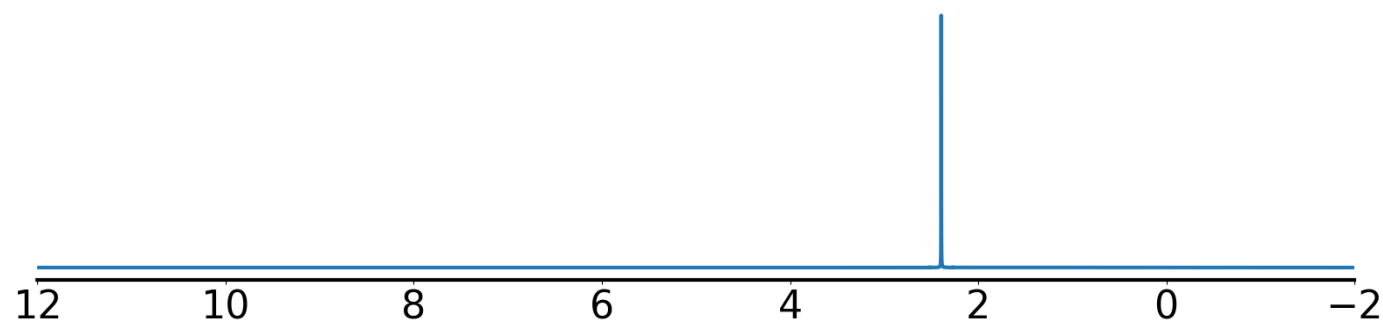

Top predicted structures (loss):

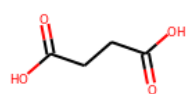

0.031774

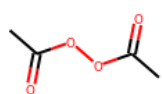

0.041147

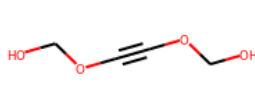

0.042675

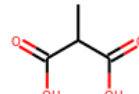

0.044818

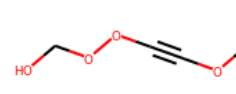

0.049815

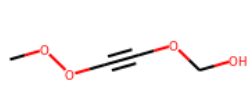

0.049815

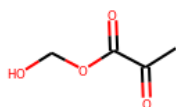

0.050201

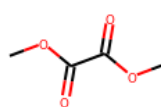

0.050657

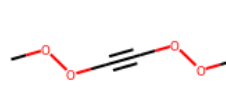

0.053666

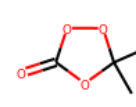

0.057383



|                                   |        |                                   |        |
|-----------------------------------|--------|-----------------------------------|--------|
| Top predicted substructures       | prob   |                                   |        |
| [CX3](=[OX1])C                    | 0.9966 | [CX4H3]                           | 0.6851 |
| [#8]=[#6][#8]                     | 0.9797 | [#6H3][#6H0]                      | 0.6646 |
| [OX2H1]                           | 0.9755 | [CX3H0](=[OX1H0])([OX2H1])[CX4H2] | 0.6119 |
| [CX3](=O)[OX2H1]                  | 0.9514 | [OX1H0]=[CX3H0][CX4H3]            | 0.5685 |
| [CX3](=[OX1])O                    | 0.944  | [#6H3][#6][#6]                    | 0.4855 |
| best positives                    | prob   | best negatives                    | prob   |
| [CX3](=[OX1])C                    | 0.9966 | CC=CC#CC                          | 0.0    |
| [#8]=[#6][#8]                     | 0.9797 | [CX2H1]#[CX2H0][CX3H1]=[CX3H0]    | 0.0    |
| [OX2H1]                           | 0.9755 | CC=CCC#C                          | 0.0    |
| [CX3](=O)[OX2H1]                  | 0.9514 | C=CC=CC#C                         | 0.0    |
| [CX3](=[OX1])O                    | 0.944  | [CX3H0](=[CX3H2])([CX4H3])[CX4H2] | 0.0    |
| [CX3H0](=[OX1H0])([OX2H1])[CX4H2] | 0.6119 | [CX3H0](=[CX3H1])([CX4H1])[CX2H0] | 0.0    |
| [CX4H2]CC=O                       | 0.4087 | [#6H2]=[#6][#6X2]                 | 0.0    |
| [CX4H2][CX3]=O                    | 0.371  | [CX3H0](=[CX3H1])([CX4H2])[CX2H0] | 0.0    |
| [CX4H2][CX4H2]                    | 0.329  | [CX3H0](=[CX3H2])([CX4H3])[CX4H1] | 0.0    |
| [#8]=[#6][#6][#6][#6]=[#8]        | 0.3273 | [CX3H0](=[CX3H2])([CX4H1])[CX3H1] | 0.0    |
| worst negatives                   | prob   | worst positives                   | prob   |
| [CX4H3]                           | 0.6851 | [CX4H2]([#6])[#6]                 | 0.0476 |
| [#6H3][#6H0]                      | 0.6646 | [#8][#6][#6][#6][#6][#8]          | 0.0867 |
| [OX1H0]=[CX3H0][CX4H3]            | 0.5685 | [#8][#6][#6][#6][#6]=[#8]         | 0.1338 |
| [#6H3][#6][#6]                    | 0.4855 | [#8][#6][#6H2]                    | 0.175  |
| [CX4H3][CX3H0]                    | 0.401  | [#6X3H0][CX4H2][CX4H2][#6X3H0]    | 0.186  |
| O=CC=O                            | 0.3188 | [CX4H2]( [CX4H2] ) [CX3H0]        | 0.1866 |
| [#8]=[#6][#6][#6]=[#8]            | 0.2301 | O=[CX3H0][CX4H2][CX4H2]           | 0.2013 |
| [#8][#6H0][#6H1]                  | 0.2193 | OCC[CH2]                          | 0.2075 |
| [#8][#6][#6]=[#8]                 | 0.2155 | [OX1H0]=[CX3H0]([#8])[CX4H2]      | 0.2393 |
| [CX3H0](=[OX1H0])([OX2H1])[CX4H1] | 0.2037 | [#8]=[#6][#6][#6][#6]=[#8]        | 0.3273 |

---

Example 60 true smiles: O=C(O)c1ccco1 formula: C5H4O3  
Index of correct structure: 1 of 305  
True structure loss: 0.019457  
True structure:

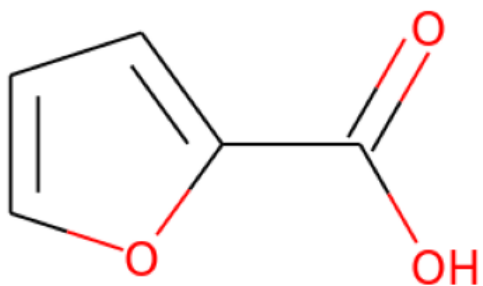

Experimental <sup>13</sup>C NMR (solvent: CDCl<sub>3</sub>)

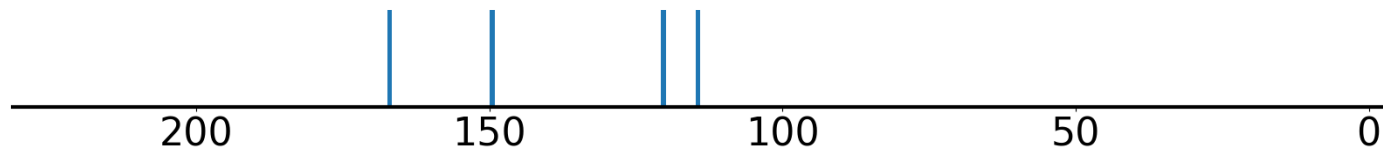

Experimental <sup>1</sup>H NMR (solvent: D<sub>2</sub>O)

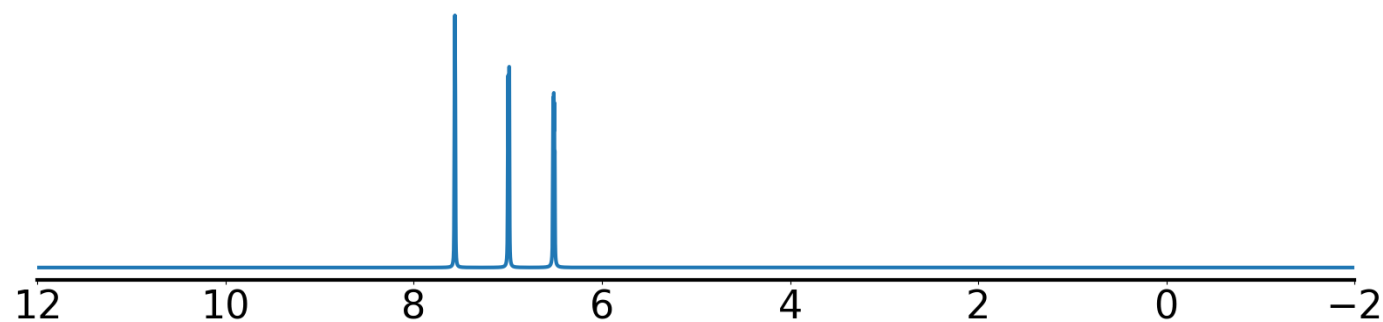

Top predicted structures (loss):

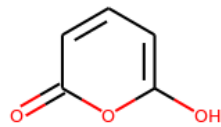

0.019025

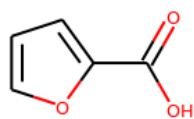

0.019457

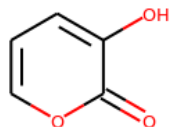

0.023511

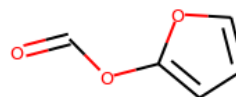

0.028772

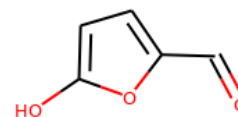

0.033818

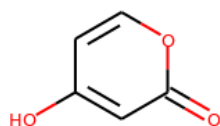

0.034053

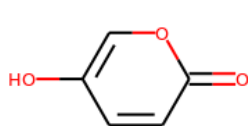

0.034793

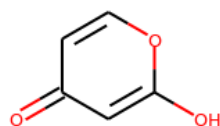

0.037258

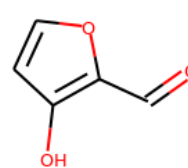

0.037339

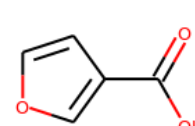

0.041355

| Top predicted substructures      | prob   |                                           |        |
|----------------------------------|--------|-------------------------------------------|--------|
| [#6H1]                           | 0.9997 | [cX3H1]([cX3H1])[cX3H0]                   | 0.9818 |
| [#6X3][#6X3]                     | 0.9986 | [cH]                                      | 0.9717 |
| [cH][cH]                         | 0.9973 | [OX2H1]                                   | 0.9519 |
| [#6X3][#6X3][#6X3][#6X3]         | 0.997  | [#8][#6H0][#6H1]                          | 0.9478 |
| [#6X3H1][#6X3H0]                 | 0.9819 | [cX3H1]([cX3H1])[cX3H1]                   | 0.9404 |
| best positives                   | prob   | best negatives                            | prob   |
| [#6H1]                           | 0.9997 | [CX4H0]([NX3H1])([CX4H3])([CX4H2])[CX4H1] | 0.0    |
| [#6X3][#6X3]                     | 0.9986 | [#6H3][#6H0][#7][#6H3]                    | 0.0    |
| [cH][cH]                         | 0.9973 | [OX2H0]1[CX4H2][CX4H2][CX4H1][CX4H1]1     | 0.0    |
| [#6X3][#6X3][#6X3][#6X3]         | 0.997  | [CX4H1]([NX3H1])([CX4H3])[CX4H2]          | 0.0    |
| [#6X3H1][#6X3H0]                 | 0.9819 | [CX4H0]([NX3H1])([CX4H2])([CX4H2])[CX4H1] | 0.0    |
| [cX3H1]([cX3H1])[cX3H0]          | 0.9818 | [CX4H1]([NX3H2])([CX4H2])[CX3H1]          | 0.0    |
| [cH]                             | 0.9717 | [CX4H2]([NX3H0])[CX4H3]                   | 0.0    |
| [OX2H1]                          | 0.9519 | [OX2H0]1[CX4H1][CX4H2][CX4H1][CX4H2]1     | 0.0    |
| [#8][#6H0][#6H1]                 | 0.9478 | [CX4H1]([NX3H0])([CX4H2])[CX4H0]          | 0.0    |
| [cX3H1]([cX3H1])[cX3H1]          | 0.9404 | [CX4H1]([NX3H2])([CX4H2])[CX4H0]          | 0.0    |
| worst negatives                  | prob   | worst positives                           | prob   |
| [OX2H][cX3]:[c]                  | 0.7344 | [#8][#6][#6]=[#8]                         | 0.0671 |
| [#6X3H1][#6X3H1][#6X3H0][#6X3H1] | 0.6806 | [#8][#6][#6][#8]                          | 0.2244 |
| [cH]cO                           | 0.6606 | [#8][#6H][#6X3][#6X3H]                    | 0.2655 |
| [#6]1[#6][#6][#6][#6]1           | 0.5628 | o[cH]                                     | 0.2833 |
| O=[cX3]                          | 0.4666 | [cX3H1]([OX2H0])[cX3H1]                   | 0.5095 |
| [OX1H0]=[cX3H0][cX3H1]           | 0.4465 | [#8][#6H1][#6H1]                          | 0.6084 |
| [cX3H0]([cX3H1])([cX3H0])[OX2H1] | 0.3877 | [CX3](=O)[OX2H1]                          | 0.6828 |
| [#8]=[#6][#6H1][#6H1]            | 0.3289 | [CX3]([OX1])O                             | 0.7246 |
| [#8][#6][#6][#6][#6][#8]         | 0.3142 | O=[#6][#6][#6X3]                          | 0.7563 |
| [cX3H0][cX3H1][cX3H1][cX3H0]     | 0.2662 | [#6H1][#6H1]                              | 0.9045 |

---

Example 61 true smiles: O=C(O)c1ccoc1 formula: C5H4O3  
Index of correct structure: 0 of 305  
True structure loss: 0.019856  
True structure:

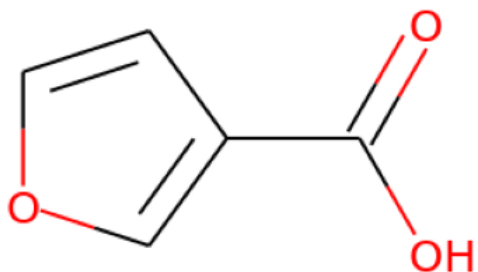

Experimental <sup>13</sup>C NMR (solvent: DMSO)



Experimental <sup>1</sup>H NMR (solvent: D2O)

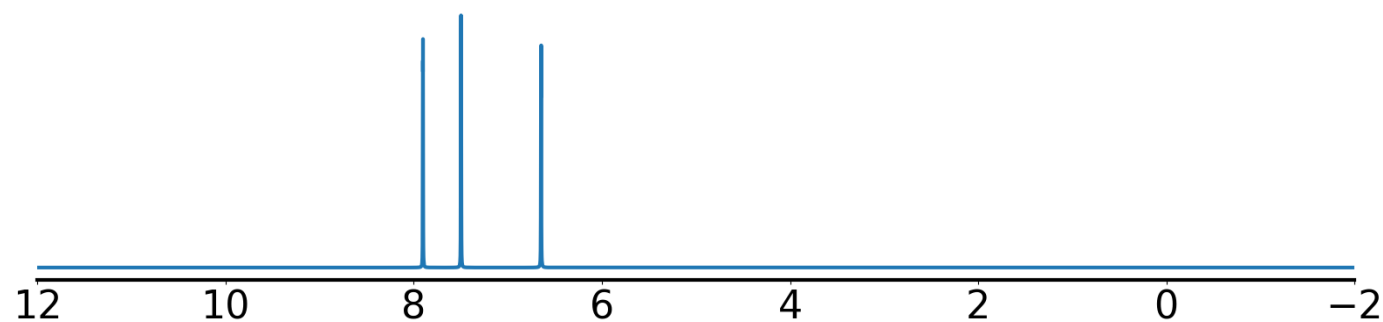

Top predicted structures (loss):

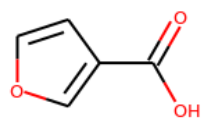

0.019856

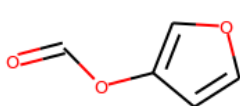

0.01998

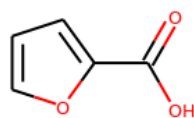

0.020896

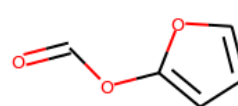

0.023368

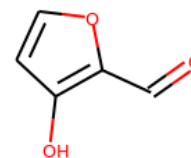

0.026213

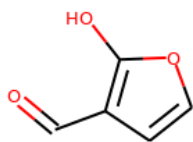

0.027661

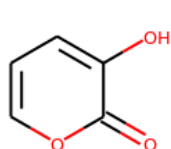

0.029271

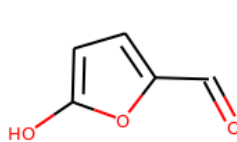

0.029832

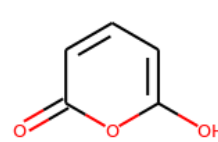

0.032661

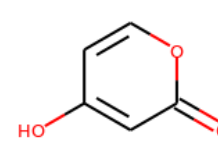

0.034723

|                                  |        |                                           |        |
|----------------------------------|--------|-------------------------------------------|--------|
| Top predicted substructures      | prob   |                                           |        |
| [#6H1]                           | 0.9999 | [#8][#6][#6][#6X3]                        | 0.9565 |
| [#6X3][#6X3]                     | 0.9981 | [cH]                                      | 0.9463 |
| [#6X3][#6X3][#6X3][#6X3]         | 0.9921 | [cX3H1]([cX3H1])[cX3H0]                   | 0.9361 |
| [#6X3H1][#6X3H0]                 | 0.9864 | [#6H1][#6H1]                              | 0.8336 |
| [cH][cH]                         | 0.9838 | [#6H][#8][#6H]                            | 0.7888 |
| best positives                   | prob   | best negatives                            | prob   |
| [#6H1]                           | 0.9999 | [CX4H0]([NX3H1])([CX4H3])([CX4H2])[CX4H1] | 0.0    |
| [#6X3][#6X3]                     | 0.9981 | [CX4H1]([NX3H1])([CX4H3])[CX4H2]          | 0.0    |
| [#6X3][#6X3][#6X3][#6X3]         | 0.9921 | [#6H3][#6H0][#7][#6H3]                    | 0.0    |
| [#6X3H1][#6X3H0]                 | 0.9864 | [CX4H1]([NX3H2])([CX4H2])[CX3H1]          | 0.0    |
| [cH][cH]                         | 0.9838 | [#6H3][#6H1][#7][#7]                      | 0.0    |
| [#8][#6][#6][#6X3]               | 0.9565 | [CX4H0]([NX3H1])([CX4H2])([CX4H2])[CX4H1] | 0.0    |
| [cH]                             | 0.9463 | [CX4H0]([CX4H3])([CX4H2])([CX4H1])[CX4H1] | 0.0    |
| [cX3H1]([cX3H1])[cX3H0]          | 0.9361 | [OX2H0][CX4H2][CX4H1]([CX4H1])[CX4H1]     | 0.0    |
| [#6H1][#6H1]                     | 0.8336 | [CX4H0]([CX4H2])([CX4H2])([CX4H1])[CX4H1] | 0.0    |
| [#6H][#8][#6H]                   | 0.7888 | [CX4H1]([NX3H0])([CX4H3])[CX4H1]          | 0.0    |
| worst negatives                  | prob   | worst positives                           | prob   |
| [#8][#6H0][#6H1]                 | 0.7747 | [#8][#6][#6][#6][#6]=[#8]                 | 0.1355 |
| [#8][#6][#6][#8]                 | 0.6262 | [CX3](=O)[OX2H1]                          | 0.2152 |
| [OX2H][cX3]:[c]                  | 0.5894 | [#8X2H0][#6X3H1][#6X3H1][#6X3H0]          | 0.2304 |
| [cH]cO                           | 0.3322 | o[cH]                                     | 0.3389 |
| [cX3H1](=[OX1H0])[OX2H0]         | 0.2327 | [cX3H1]([OX2H0])[cX3H0]                   | 0.3688 |
| [CX3](=[OX1])C                   | 0.2234 | [#8][#6][#6][#6][#6][#8]                  | 0.3849 |
| [cX3H1]([cX3H1])[cX3H1]          | 0.1932 | [#8][#6H][#6X3][#6X3H]                    | 0.4383 |
| [cX3H0]([cX3H1])([cX3H0])[OX2H1] | 0.1739 | O=[#6][#6][#6X3]                          | 0.565  |
| [#8]=[#6H0][#6H1]                | 0.1672 | [CX3](=[OX1])O                            | 0.6526 |
| [cX3H0][cX3H1][cX3H1][cX3H0]     | 0.1428 | [#8][#6H1][#6H1]                          | 0.6919 |

---

Example 62 true smiles: CCC(C)C(=O)O formula: C5H10O2  
Index of correct structure: 0 of 303  
True structure loss: 0.014043  
True structure:

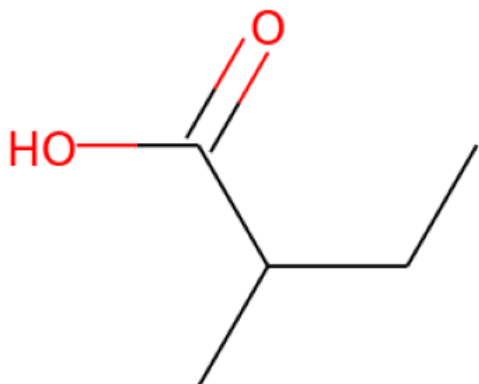

Experimental <sup>13</sup>C NMR (solvent: CDCl<sub>3</sub>)

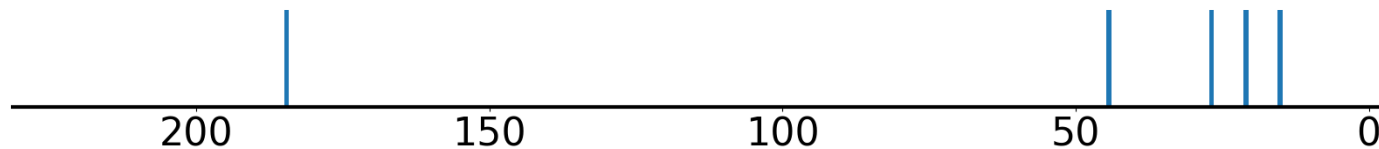

Experimental <sup>1</sup>H NMR (solvent: D<sub>2</sub>O)

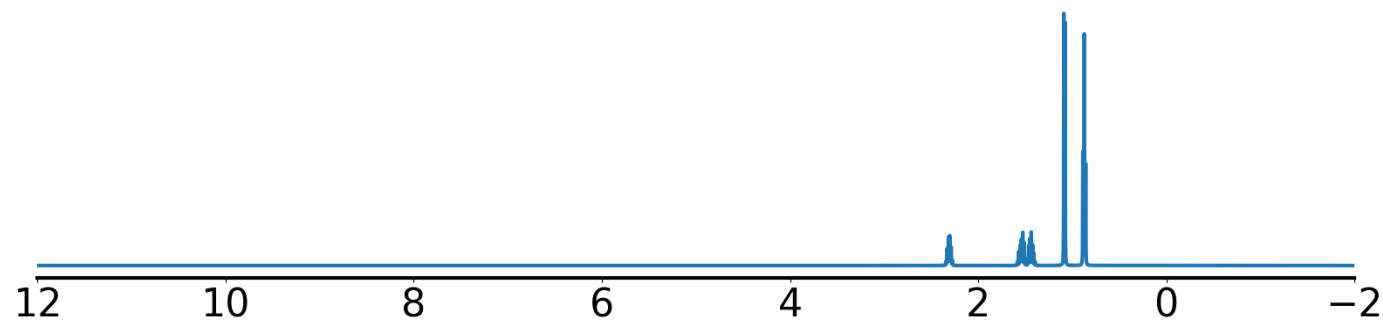

Top predicted structures (loss):

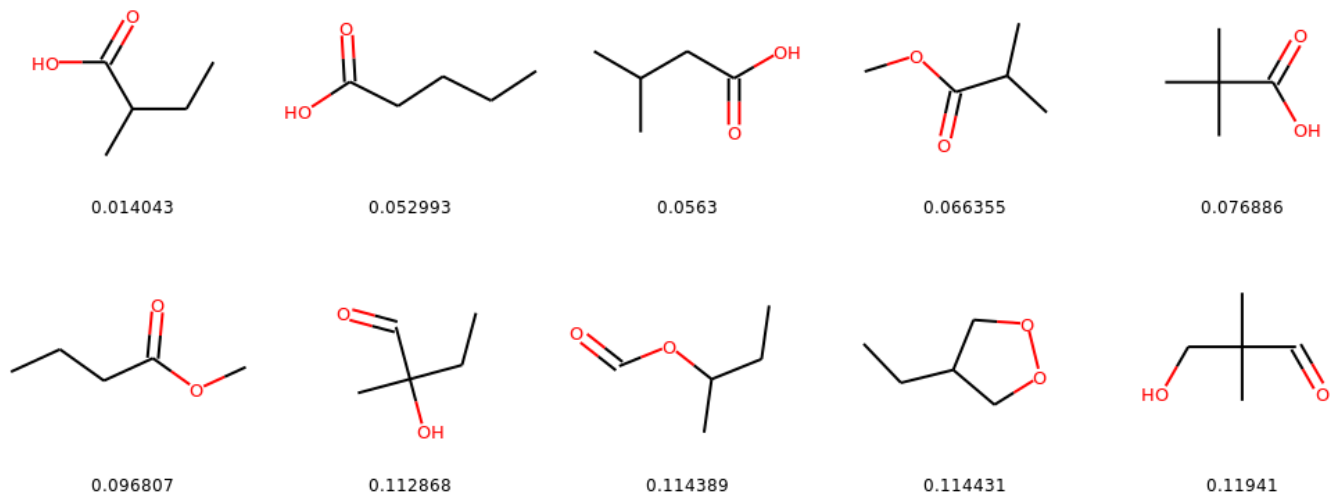

|                                           |        |                                           |        |
|-------------------------------------------|--------|-------------------------------------------|--------|
| Top predicted substructures               | prob   |                                           |        |
| [#6H3][#6][#6]                            | 0.9999 | [#8]=[#6][#8]                             | 0.9963 |
| [CX4H3]                                   | 0.9999 | [CX3](=[OX1])O                            | 0.9936 |
| [CX4H3][#6]                               | 0.9997 | [OX2H1]                                   | 0.9912 |
| [CX3](=[OX1])C                            | 0.9996 | [CX4H3][CX4H2]                            | 0.9858 |
| [CX3](=O)[OX2H1]                          | 0.9986 | [CX4H2]([#6])[#6]                         | 0.9838 |
| best positives                            | prob   | best negatives                            | prob   |
| [#6H3][#6][#6]                            | 0.9999 | CCC=CC#C                                  | 0.0    |
| [CX4H3]                                   | 0.9999 | [CX2H1]#[CX2H0][CX3H1]=[CX3H0]            | 0.0    |
| [CX4H3][#6]                               | 0.9997 | C=CC=CC#C                                 | 0.0    |
| [CX3](=[OX1])C                            | 0.9996 | CC=CC#CC                                  | 0.0    |
| [CX3](=O)[OX2H1]                          | 0.9986 | CCC#CC#C                                  | 0.0    |
| [#8]=[#6][#8]                             | 0.9963 | [CX2H0](#[CX2H1])[CX4H2]                  | 0.0    |
| [CX3](=[OX1])O                            | 0.9936 | CCC#CC=C                                  | 0.0    |
| [OX2H1]                                   | 0.9912 | [CX2H0](#[CX2H1])[CX4H0]                  | 0.0    |
| [CX4H3][CX4H2]                            | 0.9858 | [CX3H1](=[CX3H1])[CX2H0]                  | 0.0    |
| [CX4H2]([#6])[#6]                         | 0.9838 | CC=CCC#C                                  | 0.0    |
| worst negatives                           | prob   | worst positives                           | prob   |
| [#8]=[#6][#6H1][#6H1]                     | 0.5029 | [OX1H0]=[CX3H0][CX4H1]( [CX4H3] ) [CX4H2] | 0.057  |
| [CX4H2]( [CX4H3] ) [CX4H2]                | 0.4372 | [CX4H1]( [CX4H3] ) ( [CX4H2] ) [CX3H0]    | 0.1103 |
| [CX4H1]( [CX4H3] ) ( [CX4H2] ) [CX4H1]    | 0.2367 | [CH3]CC[OH]                               | 0.4417 |
| [CX3H0](=[OX1H0])( [OX2H1] ) [CX4H2]      | 0.2289 | OCC[CH2]                                  | 0.4992 |
| [CX4H2][CX4H2]                            | 0.1978 | [#6H3][#6][#6][#6H3]                      | 0.6141 |
| [OX1H0]=[CX3H0][CX4H1]( [CX4H1] ) [CX4H3] | 0.1775 | [CX4H2]CC=O                               | 0.7558 |
| [CX4H2][CX3]=O                            | 0.168  | [#6H1][#6H2]                              | 0.7588 |
| CCCCC                                     | 0.1628 | [CX4H3][CX4H1]                            | 0.7661 |
| [#6H1][#6H1]                              | 0.1216 | [#6H3][#6][#6X3]                          | 0.7788 |
| [OX1H0]=[CX3H0]( [#8] ) [CX4H2]           | 0.1055 | [CHX4]( [CH3X4] ) [CH2X4]                 | 0.7844 |

---

Example 63 true smiles: CC(=O)CCCO formula: C5H10O2  
Index of correct structure: 0 of 303  
True structure loss: 0.010088  
True structure:

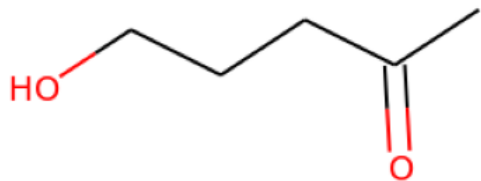

Experimental <sup>13</sup>C NMR (solvent: CDCl<sub>3</sub>)

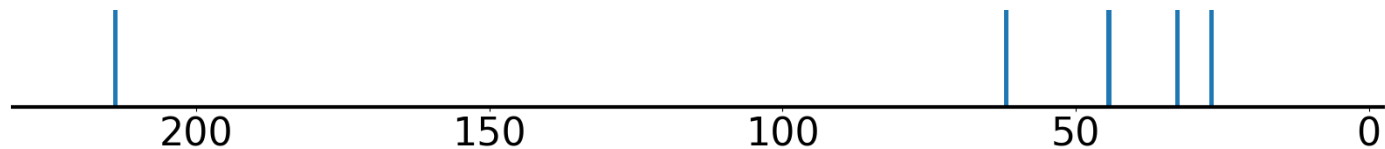

Experimental <sup>1</sup>H NMR (solvent: CDCl<sub>3</sub>)

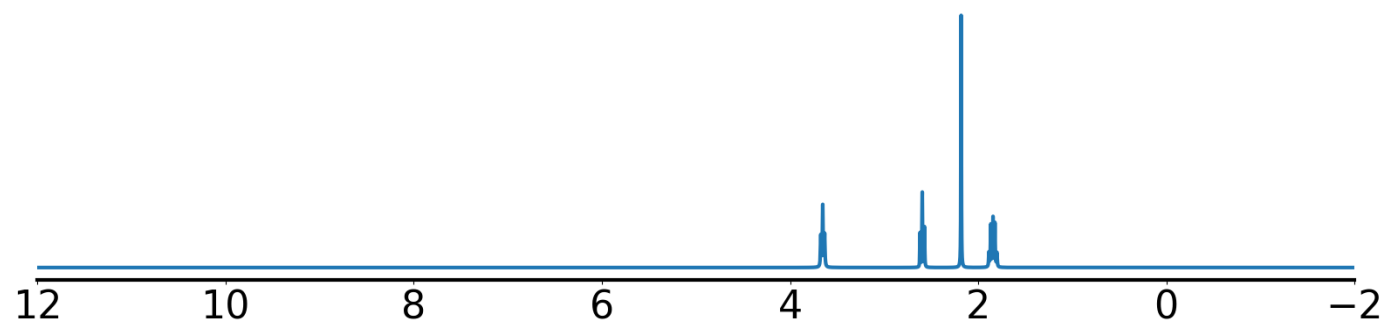

Top predicted structures (loss):

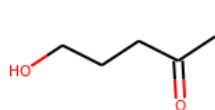

0.010088

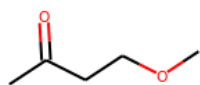

0.03921

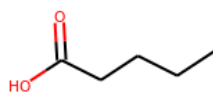

0.090852

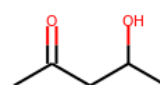

0.091266

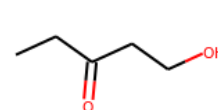

0.094873

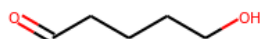

0.095749

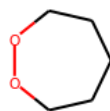

0.098055

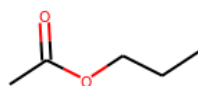

0.104903

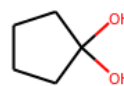

0.106108

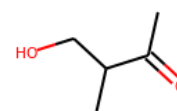

0.11082



|                                      |        |                                      |        |
|--------------------------------------|--------|--------------------------------------|--------|
| Top predicted substructures          | prob   |                                      |        |
| [CX4H3][CX3]                         | 0.9998 | [#6H3][#6][#6]                       | 0.9918 |
| [CX3](=[OX1])C                       | 0.9998 | [CX4H3]                              | 0.9916 |
| [CX4H3][CX3H0]                       | 0.9996 | [CX4H2][CX4H2]                       | 0.9795 |
| [CX4H2]([#6])[#6]                    | 0.9993 | [#6H3][#6H0]                         | 0.9788 |
| [OX1H0]=[CX3H0][CX4H3]               | 0.9963 | [OX2H1]                              | 0.9677 |
| best positives                       | prob   | best negatives                       | prob   |
| [CX4H3][CX3]                         | 0.9998 | [CX2H0](#[CX2H1])[CX3H0]             | 0.0    |
| [CX3](=[OX1])C                       | 0.9998 | CC=CC#CC                             | 0.0    |
| [CX4H3][CX3H0]                       | 0.9996 | CCC#CC#C                             | 0.0    |
| [CX4H2]([#6])[#6]                    | 0.9993 | CCC=CC#C                             | 0.0    |
| [OX1H0]=[CX3H0][CX4H3]               | 0.9963 | C=CC=CC#C                            | 0.0    |
| [#6H3][#6][#6]                       | 0.9918 | [CX2H0](#[CX2H1])[CX3H1]             | 0.0    |
| [CX4H3]                              | 0.9916 | [CX2H0](#[CX2H0])[CX2H0]             | 0.0    |
| [CX4H2][CX4H2]                       | 0.9795 | [CX2H1]#[CX2H0][CX3H1]=[CX3H0]       | 0.0    |
| [#6H3][#6H0]                         | 0.9788 | [CX3H0](=[CX3H1])([OX2H0])[CX2H0]    | 0.0    |
| [OX2H1]                              | 0.9677 | [CX2H0](#[NX1H0])[CX3H1]             | 0.0    |
| worst negatives                      | prob   | worst positives                      | prob   |
| [CX4H2]( [CX4H2] ) [CX4H1]           | 0.5141 | [CH2X4](O)[CX4H2][CX4H2]             | 0.1512 |
| CCCCC                                | 0.4032 | [CH2X4](O)[CX4H2]                    | 0.6482 |
| [#6H1][#6H2]                         | 0.3595 | [#8][#6][#6][#6][#6]=[#8]            | 0.6769 |
| [#8][#6][#6][#6X3]                   | 0.3522 | [CX4H2]( [CX4H2] ) [CX4H2]           | 0.8301 |
| [#6H1]                               | 0.2949 | [CX4H2]( [CX4H2] ) [CX3H0]           | 0.8455 |
| [#8H][#6H2][#6H1]                    | 0.2832 | OCC[CH2]                             | 0.8591 |
| O=[CX3][CX4H]                        | 0.2562 | [CX4H2]( [#6] ) [O]                  | 0.8856 |
| [CX3H0](=[OX1H0])( [CX4H3] ) [CX4H1] | 0.2165 | [#6H3][#6X3H0][#6H2]                 | 0.8945 |
| [#6H1]( [#6H2] ) [#6H2]              | 0.1998 | [CX3H0](=[OX1H0])( [CX4H3] ) [CX4H2] | 0.8949 |
| [#8]=[#6H0][#6H1]                    | 0.1608 | [CX4H3][#6]                          | 0.9037 |

---

Example 64 true smiles: OC1CCCCO1 formula: C5H10O2  
Index of correct structure: 0 of 303  
True structure loss: 0.020487  
True structure:

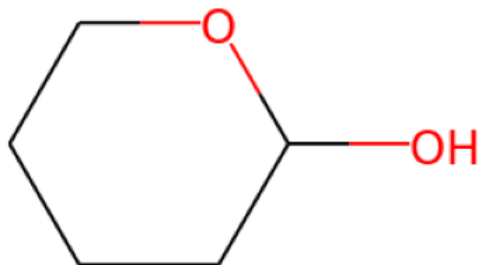

Experimental <sup>13</sup>C NMR (solvent: CDCl<sub>3</sub>)

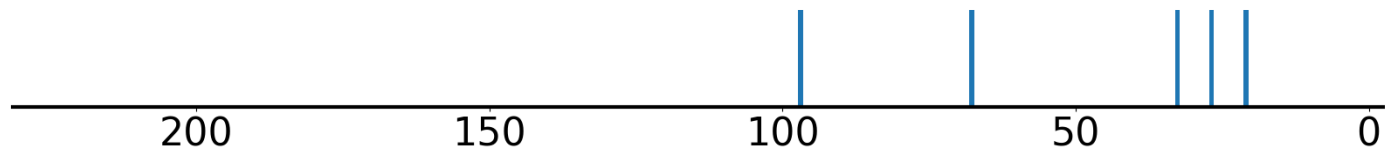

Experimental <sup>1</sup>H NMR (solvent: CDCl<sub>3</sub>)

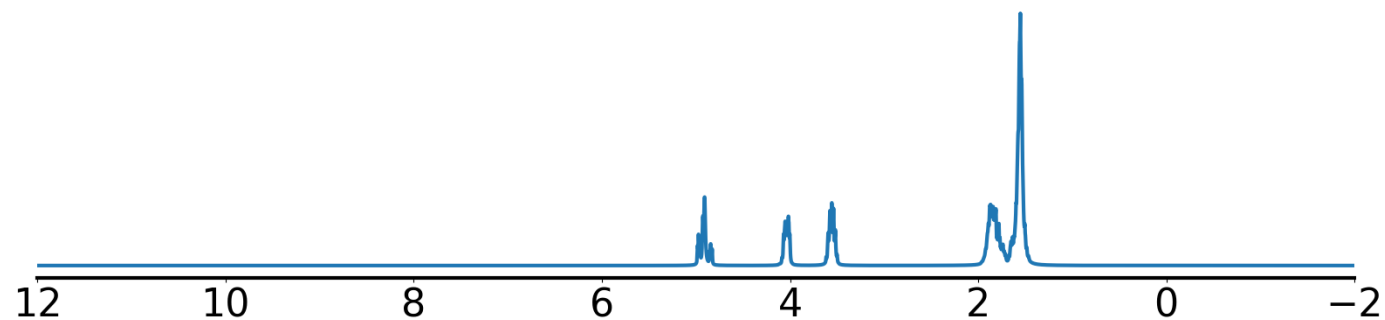

Top predicted structures (loss):

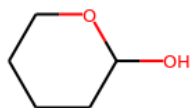

0.020487

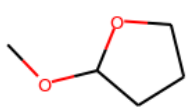

0.02636

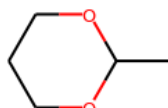

0.035684

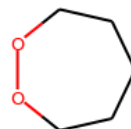

0.038011

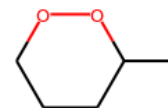

0.0395

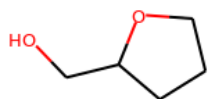

0.040049

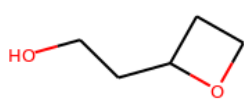

0.042894

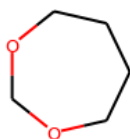

0.043229

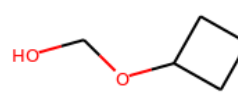

0.044938

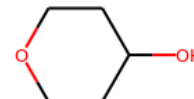

0.048109

| Top predicted substructures | prob   |                                   |        |
|-----------------------------|--------|-----------------------------------|--------|
| [CX4H2]([#6])[#6]           | 1.0    | [CX4H2]([CX4H2])[CX4H1]           | 0.9946 |
| OCC[CH2]                    | 0.998  | [CX4H]O                           | 0.9825 |
| [#6H1]                      | 0.9974 | [CX4H2][CX4H2]                    | 0.9365 |
| [#8][#6][#6H2]              | 0.9971 | O[CX4H][CX4H2]                    | 0.9079 |
| [CX4H2]([#6])[O]            | 0.9956 | [#6H1][#6H2]                      | 0.9076 |
| best positives              | prob   | best negatives                    | prob   |
| [CX4H2]([#6])[#6]           | 1.0    | C=CC=CC#C                         | 0.0    |
| OCC[CH2]                    | 0.998  | [CX2H1]#[CX2H0][CX3H1]=[CX3H0]    | 0.0    |
| [#6H1]                      | 0.9974 | [CX3H0](=[CX3H1])([OX2H0])[CX2H0] | 0.0    |
| [#8][#6][#6H2]              | 0.9971 | [CX3H0](=[CX3H1])([CX4H1])[CX2H0] | 0.0    |
| [CX4H2]([#6])[O]            | 0.9956 | [#6X2][#6H1][#6X2]                | 0.0    |
| [CX4H2]([CX4H2])[CX4H1]     | 0.9946 | [#7][#6]=[#6][#6][#7]             | 0.0    |
| [CX4H]O                     | 0.9825 | CCC#CC#C                          | 0.0    |
| [CX4H2][CX4H2]              | 0.9365 | [CX3H0][CX3H1]=[CX3H1][CX3H0]     | 0.0    |
| O[CX4H][CX4H2]              | 0.9079 | [CX3H0](=[CX3H1])([CX4H2])[CX2H0] | 0.0    |
| [#6H1][#6H2]                | 0.9076 | [OX1H0]=[CX3H0][CX2H0]#[CX2H1]    | 0.0    |
| worst negatives             | prob   | worst positives                   | prob   |
| [OX2H0][CX4H1][OX2H0]       | 0.6672 | [#8]1[#6][#6][#6][#6]1            | 0.048  |
| [#8][#6H1][#6H1]            | 0.5624 | [OH][CX4H]                        | 0.1732 |
| [#6H1][#6H1]                | 0.5456 | [#6X4H2][#6H1][#8H]               | 0.2408 |
| O[CX4H]([CX4H2])[CX4H1]     | 0.5033 | [CX4H2][CX4H2][CX4H2][CX4H2]      | 0.3783 |
| [#8][#6][#6][#6][#6][#8]    | 0.4638 | [OX2H1]                           | 0.5085 |
| [CX4H](O)CO                 | 0.4605 | [OX2H0][CX4H1][CX4H2][CX4H2]      | 0.6416 |
| [CX4H3]                     | 0.4106 | [CX4H2]([OX2H0])[CX4H2]           | 0.7132 |
| [CX4H3][#6]                 | 0.3516 | [OX2H0][CX4H2][CX4H2][CX4H2]      | 0.7525 |
| [CH3][#6][#8]               | 0.3455 | [CX4H2]([CX4H2])[CX4H2]           | 0.8615 |
| [#8][#6][#6][#8]            | 0.3393 | [CH2X4](O)[CX4H2]                 | 0.8654 |

Example 65 true smiles: C#CC(C)(O)CC formula: C6H10O  
 Index of correct structure: 0 of 283  
 True structure loss: 0.017885  
 True structure:

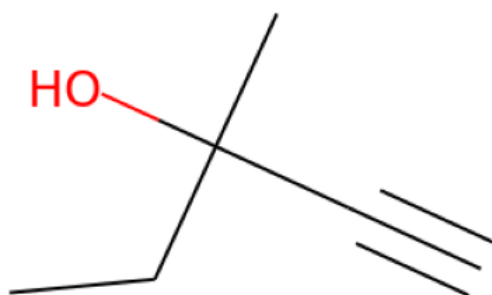

Experimental <sup>13</sup>C NMR (solvent: CDCl<sub>3</sub>)

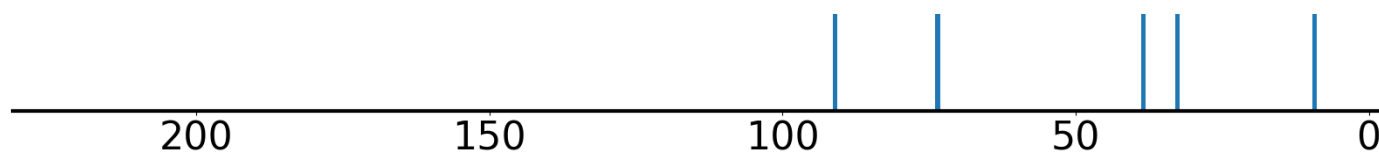

Experimental <sup>1</sup>H NMR (solvent: CDCl<sub>3</sub>)

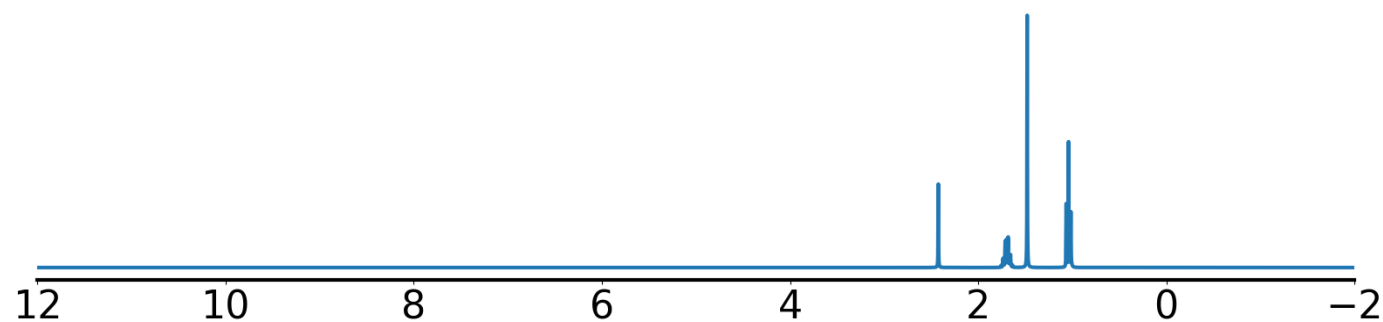

Top predicted structures (loss):

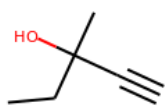

0.017885

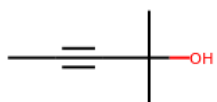

0.04282

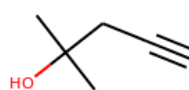

0.046047

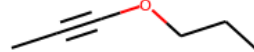

0.049568

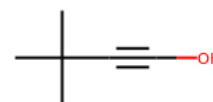

0.053311

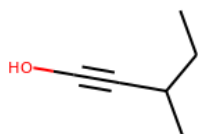

0.054724

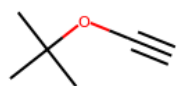

0.05563

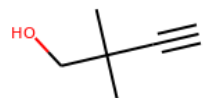

0.055832

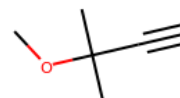

0.055998

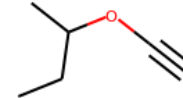

0.057715

| Top predicted substructures | prob   |                                        |        |
|-----------------------------|--------|----------------------------------------|--------|
| [#6H3][#6][#6]              | 0.9993 | [#6H3][#6H0]                           | 0.975  |
| [CX4H3]                     | 0.9951 | [CX4H3][CX4H2]                         | 0.9521 |
| [CX4H2][[#6)][#6]           | 0.9948 | [CX4H3][CX4]O                          | 0.95   |
| [CX4H3][CX4H0]              | 0.9851 | [#8][#6][#6H2]                         | 0.9194 |
| [CX4H3][#6]                 | 0.9802 | [\$( [CX2]#C )]                        | 0.8795 |
| best positives              | prob   | best negatives                         | prob   |
| [#6H3][#6][#6]              | 0.9993 | [#7][#6]=[#6][#6][#6]=[#7]             | 0.0    |
| [CX4H3]                     | 0.9951 | [CX4H1]([NX3H2])([CX4H2])[CX3H1]       | 0.0    |
| [CX4H2][[#6)][#6]           | 0.9948 | [CX3H1](=[CX3H2])[NX3H0]               | 0.0    |
| [CX4H3][CX4H0]              | 0.9851 | [CX3H0](=[NX2H1])([NX3H1])[CX4H1]      | 0.0    |
| [CX4H3][#6]                 | 0.9802 | [CX3H0][CX3H1]=[CX3H1][CX3H0]          | 0.0    |
| [#6H3][#6H0]                | 0.975  | [OX1H0]=[CX3H0]1[CX4H1][CX4H1][CX4H2]1 | 0.0    |
| [CX4H3][CX4H2]              | 0.9521 | [CX4H2]([NX2H0])[CX4H1]                | 0.0    |
| [CX4H3][CX4]O               | 0.95   | [OX2H0]1[CX4H2][CX4H1][CX3H0]=[CX3H1]1 | 0.0    |
| [#8][#6][#6H2]              | 0.9194 | [CX3H0](=[CX3H2])([CX4H1])[CX3H1]      | 0.0    |
| [\$( [CX2]#C )]             | 0.8795 | [#7][#6]=[#6][#6]#[#7]                 | 0.0    |
| worst negatives             | prob   | worst positives                        | prob   |
| OCC[CH2]                    | 0.6462 | [CX2H0]([CX2H1])[CX4H0]                | 0.0328 |
| [CX4H2][CX4H2]              | 0.3184 | [#6H2][#6][#6X2]                       | 0.3117 |
| [#8][#6H0][#6H1]            | 0.3114 | [#6H3][#6][#6][#6H3]                   | 0.4323 |
| [#6H1][#6H2]                | 0.3109 | [CX2H1]#[CX2H0]                        | 0.5117 |
| [CX2H0]([CX2H1])[CX4H1]     | 0.2883 | [CX4H2]([CX4H3])[CX4H0]                | 0.5759 |
| [#6H3][#6H0]([#6H2])[#6H2]  | 0.2628 | [OX2H1][CX4H0][CX4H2][CX4H3]           | 0.6287 |
| C1CC1                       | 0.2592 | [#6H1]                                 | 0.6414 |
| CCCCC                       | 0.257  | [CH3]CC[OH]                            | 0.67   |
| [CX4H2]([CX4H2])[CX4H0]     | 0.2373 | [CH3][#6][#8]                          | 0.755  |
| CCCC#C                      | 0.2188 | [#6X4H3][#6][#8H]                      | 0.7729 |

---

Example 66 true smiles: O=C1CCCCC1 formula: C6H10O  
Index of correct structure: 0 of 283  
True structure loss: 0.004536  
True structure:

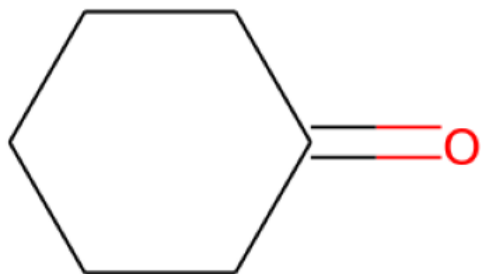

Experimental <sup>13</sup>C NMR (solvent: CDCl<sub>3</sub>)

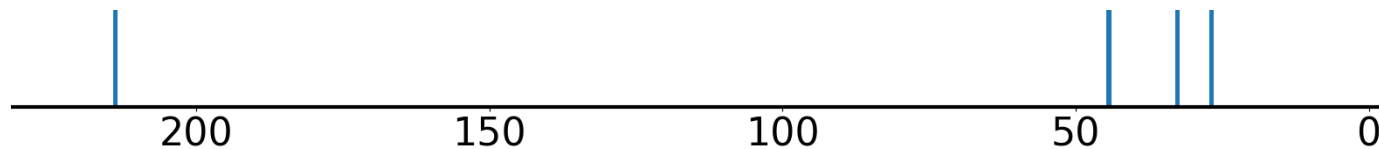

Experimental <sup>1</sup>H NMR (solvent: D<sub>2</sub>O)

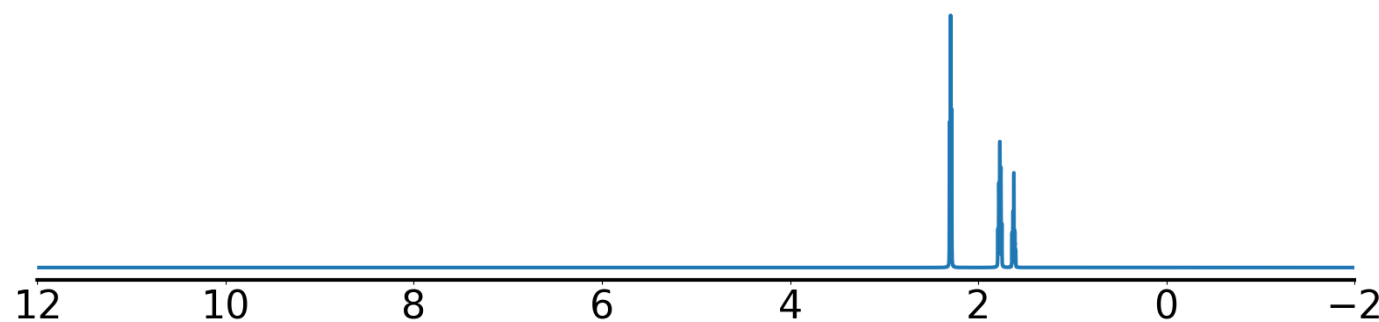

Top predicted structures (loss):

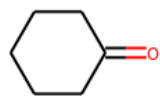

0.004536

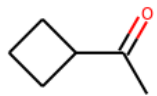

0.077206

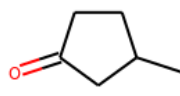

0.078029

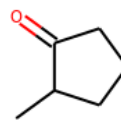

0.079376

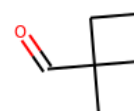

0.081844

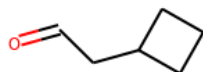

0.083365

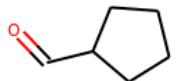

0.100834

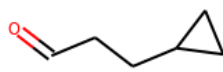

0.132923

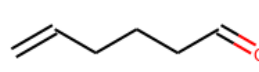

0.138809

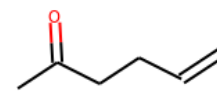

0.144015

|                               |        |                                   |        |
|-------------------------------|--------|-----------------------------------|--------|
| Top predicted substructures   | prob   |                                   |        |
| [CX4H2]([#6])[#6]             | 0.9998 | [CX4H2][CX4H2]                    | 0.9767 |
| [CX3](=[OX1])C                | 0.9998 | [CX4H2][CX4H2][CX4H2][CX4H2]      | 0.9672 |
| O=[CX3H0][CX4H2][CX4H2]       | 0.9891 | [CX4H2]([CX4H2])[CX4H2]           | 0.9611 |
| [CX4H2]([CX4H2])[CX3H0]       | 0.979  | [CX4H2]CC=O                       | 0.9474 |
| [OX1H0]=[CX3H0]([#6])[CX4H2]  | 0.9772 | CCCCC                             | 0.9209 |
| best positives                | prob   | best negatives                    | prob   |
| [CX4H2]([#6])[#6]             | 0.9998 | [CX2H0]([#CX2H1])[CX3H0]          | 0.0    |
| [CX3](=[OX1])C                | 0.9998 | C=CC=CC#C                         | 0.0    |
| O=[CX3H0][CX4H2][CX4H2]       | 0.9891 | CC=CCC#C                          | 0.0    |
| [CX4H2]([CX4H2])[CX4H2]       | 0.979  | [OX2H1][CX4H1][CX4H1][CX2H0]      | 0.0    |
| [OX1H0]=[CX3H0]([#6])[CX4H2]  | 0.9772 | [CX2H0]([#CX2H0])[CX2H0]          | 0.0    |
| [CX4H2][CX4H2]                | 0.9767 | [CX3H0]([#CX3H1]([OX2H0])[CX2H0]) | 0.0    |
| [CX4H2][CX4H2][CX4H2][CX4H2]  | 0.9672 | [CX3H0]([#CX3H1]([CX4H1])[CX2H0]) | 0.0    |
| [CX4H2]([CX4H2])[CX4H2]       | 0.9611 | CCC#CC#C                          | 0.0    |
| [CX4H2]CC=O                   | 0.9474 | [CX4H1]([OX2H0]([CX4H2])[CX2H0])  | 0.0    |
| CCCCC                         | 0.9209 | C=CCC#C                           | 0.0    |
| worst negatives               | prob   | worst positives                   | prob   |
| [#6H1][#6H2]                  | 0.2387 | [#6]1[#6][#6][#6][#6]1            | 0.5154 |
| [#6H1]                        | 0.187  | [CX3H0]([#OX1H0]([CX4H2])[CX4H2]) | 0.6664 |
| [#6H3][#6H0]                  | 0.1785 | [#6H2][#6X3H0][#6H2]              | 0.7679 |
| C1CCCC1                       | 0.1673 | [CX4H2][CX3]=O                    | 0.9125 |
| [CX4H3][CX3]                  | 0.1437 | CCCCC                             | 0.9209 |
| [OX1H0]=[CX3H1][CX4H2][CX4H2] | 0.1148 | [CX4H2]CC=O                       | 0.9474 |
| [CX4H3][#6]                   | 0.1057 | [CX4H2]([CX4H2])[CX4H2]           | 0.9611 |
| [CX4H2]([CX4H2])[CX4H1]       | 0.1041 | [CX4H2][CX4H2][CX4H2][CX4H2]      | 0.9672 |
| [#8]=[#6H0][#6H1]             | 0.0888 | [CX4H2][CX4H2]                    | 0.9767 |
| C1CCC1                        | 0.0819 | [OX1H0]=[CX3H0]([#6])[CX4H2]      | 0.9772 |

---

Example 67 true smiles: O=C1CCCN1 formula: C4H7NO  
 Index of correct structure: 0 of 253  
 True structure loss: 0.015705  
 True structure:

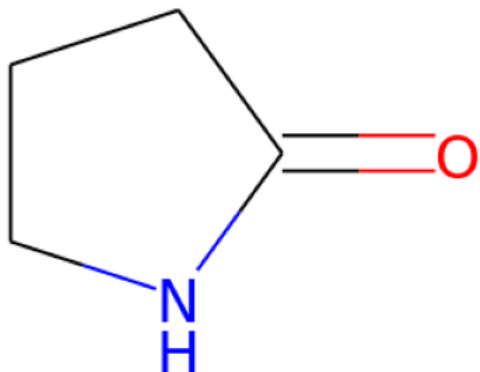

Experimental <sup>13</sup>C NMR (solvent: CDCl<sub>3</sub>)

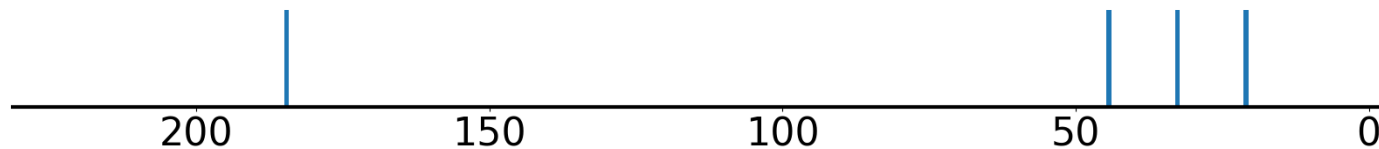

Experimental <sup>1</sup>H NMR (solvent: CDCl<sub>3</sub>)

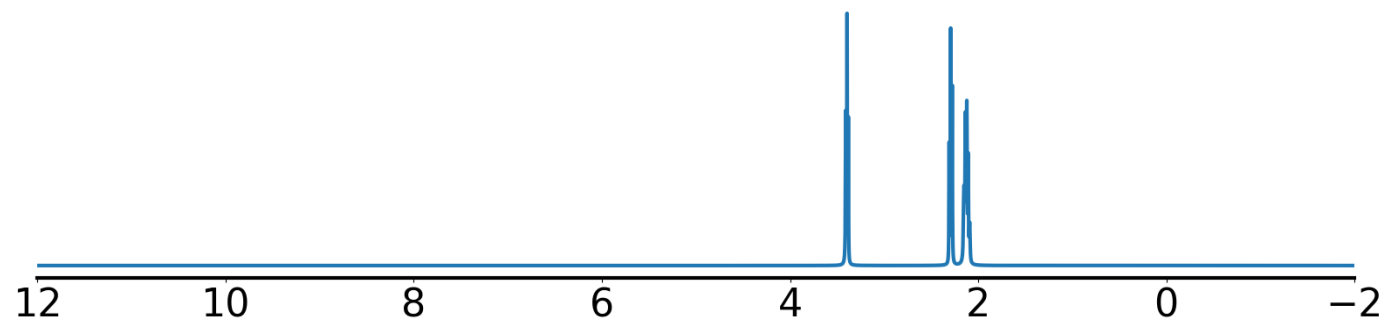

Top predicted structures (loss):

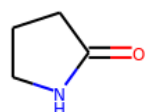

0.015705

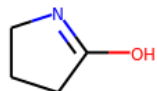

0.047983

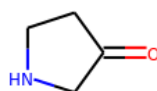

0.050845

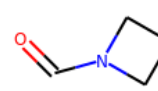

0.068081

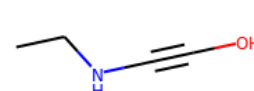

0.075688

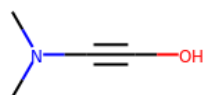

0.076671

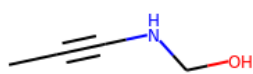

0.08281

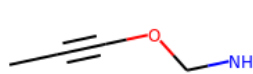

0.083603

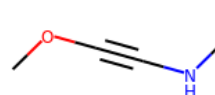

0.083906

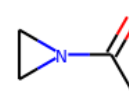

0.087963



|                             |        |                                        |        |
|-----------------------------|--------|----------------------------------------|--------|
| Top predicted substructures | prob   |                                        |        |
| [CX4H2]([#6])[#6]           | 0.9984 | [#7][#6H2][#6H2]                       | 0.8243 |
| [CX3](=[OX1])C              | 0.9682 | [CX4H2]([CX4H2])[CX4H2]                | 0.7358 |
| [#7X3][#6H2]                | 0.9589 | [CX4H2]CC=O                            | 0.7273 |
| [#7][#6H2]                  | 0.9225 | [#6H2][#7][#6X3]                       | 0.6801 |
| [CX4H2][CX4H2]              | 0.8921 | [CX4H2][CX3]=O                         | 0.6556 |
| best positives              | prob   | best negatives                         | prob   |
| [CX4H2]([#6])[#6]           | 0.9984 | C=CC=CC#C                              | 0.0    |
| [CX3](=[OX1])C              | 0.9682 | [CX2H1]#[CX2H0][CX3H1]=[CX3H0]         | 0.0    |
| [#7X3][#6H2]                | 0.9589 | [OX2H0][CX3H1]=[#6X3H0][#8X2H0]        | 0.0    |
| [#7][#6H2]                  | 0.9225 | CC=CC#CC                               | 0.0    |
| [CX4H2][CX4H2]              | 0.8921 | [CX3H0](=[CX3H1])([OX2H0])[CX2H0]      | 0.0    |
| [#7][#6H2][#6H2]            | 0.8243 | [OX2H0]1[CX4H2][CX4H1][CX3H0]=[CX3H1]1 | 0.0    |
| [CX4H2]([CX4H2])[CX4H2]     | 0.7358 | [#6H2]=[#6][#6X2]                      | 0.0    |
| [CX4H2]CC=O                 | 0.7273 | [CX3H1](=[CX3H1])[CX2H0]               | 0.0    |
| [#6H2][#7][#6X3]            | 0.6801 | [CX2H0](#[CX2H1])[CX3H0]               | 0.0    |
| [CX4H2][CX3]=O              | 0.6556 | [CX3H2]=[CX3H1][CX4H0][OX2H1]          | 0.0    |
| worst negatives             | prob   | worst positives                        | prob   |
| [#6H1][#6H2]                | 0.4022 | [CX3H0](=[OX1H0])([NX3H1])[CX4H2]      | 0.2453 |
| [#7X3H2]                    | 0.3854 | [CX4H2]([NX3H1])[CX4H2]                | 0.4575 |
| [#8]=[#6H0][#6H1]           | 0.3797 | [#7X3H1]                               | 0.4674 |
| O=[CX3][CX4H]               | 0.326  | [#6]1[#6][#6][#7]1                     | 0.4804 |
| C1CCC1                      | 0.3254 | [CX4H2]([CX4H2])[CX3H0]                | 0.6058 |
| [#6H1]                      | 0.2596 | O=[CX3H0][CX4H2][CX4H2]                | 0.6344 |
| [CX4H2]([CX4H2])[CX4H1]     | 0.2446 | [CX4H2][CX3]=O                         | 0.6556 |
| [#7][#6H0][#6H1]            | 0.2069 | [#6H2][#7][#6X3]                       | 0.6801 |
| [#7][#6][#6X3]              | 0.2055 | [CX4H2]CC=O                            | 0.7273 |
| [OX2H1]                     | 0.2027 | [CX4H2]([CX4H2])[CX4H2]                | 0.7358 |

---

Example 68 true smiles: NCCC(=O)O formula: C3H7NO2  
Index of correct structure: 0 of 207  
True structure loss: 0.017592  
True structure:

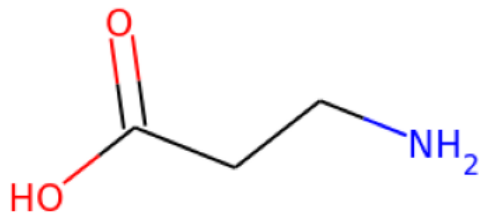

Experimental <sup>13</sup>C NMR (solvent: D2O)

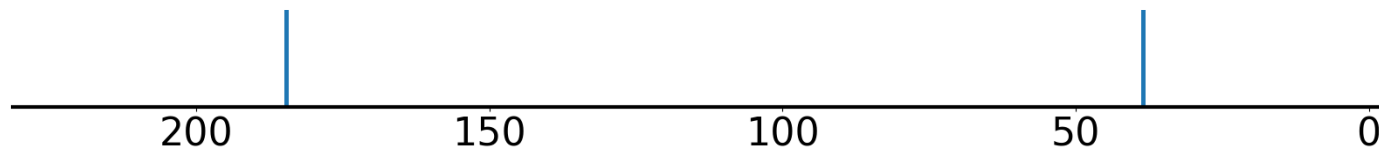

Experimental <sup>1</sup>H NMR (solvent: D2O)

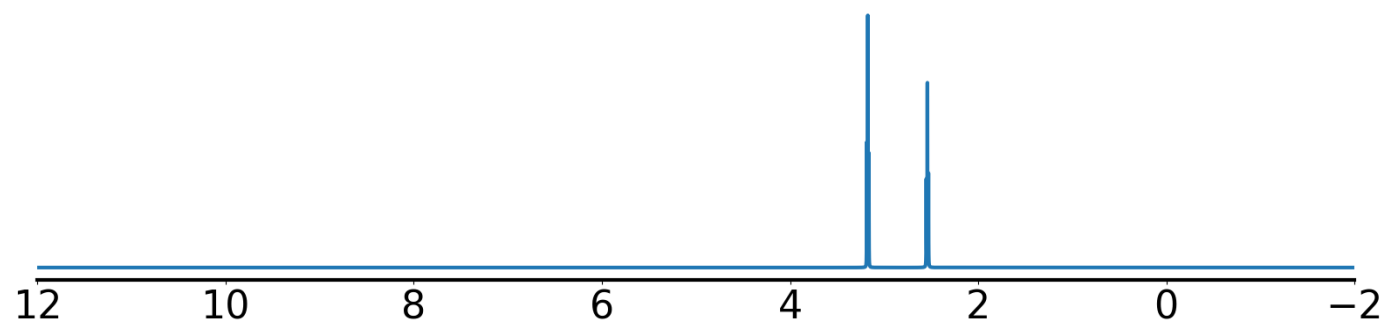

Top predicted structures (loss):

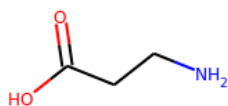

0.017592

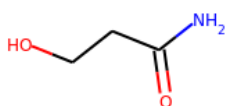

0.041783

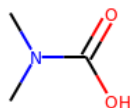

0.051769

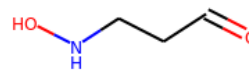

0.055945

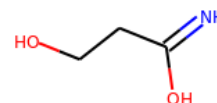

0.056672

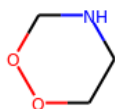

0.061544

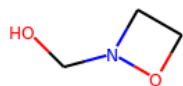

0.062582

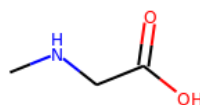

0.064633

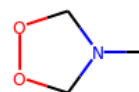

0.064962

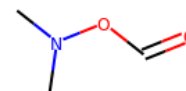

0.070064

|                                   |        |                                   |        |
|-----------------------------------|--------|-----------------------------------|--------|
| Top predicted substructures       | prob   |                                   |        |
| [CX3](=[OX1])C                    | 0.9913 | [CX4H2]([CX4H2])[CX3H0]           | 0.8631 |
| [OX2H1]                           | 0.9717 | [CX4H2]CC=O                       | 0.857  |
| [CX4H2]([#6])[#6]                 | 0.9569 | [#7X3H2]                          | 0.8246 |
| [CX3](=O)[OX2H1]                  | 0.9489 | [#7X3][#6H2]                      | 0.7873 |
| O=[CX3H0][CX4H2][CX4H2]           | 0.9143 | [CX4H2][CX3]=O                    | 0.7314 |
| best positives                    | prob   | best negatives                    | prob   |
| [CX3](=[OX1])C                    | 0.9913 | C=CC=CC#C                         | 0.0    |
| [OX2H1]                           | 0.9717 | [CX2H1]#[CX2H0][CX3H1]=[CX3H0]    | 0.0    |
| [CX4H2]([#6])[#6]                 | 0.9569 | CC=CCC#C                          | 0.0    |
| [CX3](=O)[OX2H1]                  | 0.9489 | CC=CC#CC                          | 0.0    |
| O=[CX3H0][CX4H2][CX4H2]           | 0.9143 | [CX2H0](#[CX2H1])[CX4H1]          | 0.0    |
| [CX4H2]([CX4H2])[CX3H0]           | 0.8631 | CCC#CC#C                          | 0.0    |
| [CX4H2]CC=O                       | 0.857  | [CX3H0](=[CX3H1])([OX2H0])[CX2H0] | 0.0    |
| [#7X3H2]                          | 0.8246 | [CX3H1](=[CX3H1])[CX2H0]          | 0.0    |
| [#7X3][#6H2]                      | 0.7873 | [CX2H0](#[CX2H1])[CX4H0]          | 0.0    |
| [CX4H2][CX3]=O                    | 0.7314 | [CX2H0](#[CX2H1])[CX3H0]          | 0.0    |
| worst negatives                   | prob   | worst positives                   | prob   |
| [#7X3H1]                          | 0.3625 | [#7][#6][#6][#6X3]                | 0.1377 |
| [#7H2][#6H0]                      | 0.2898 | [CX4H2]([NX3H2])[CX4H2]           | 0.1485 |
| [CX3H0](=[OX1H0])([OX2H1])[CX4H1] | 0.2645 | [OX1H0]=[CX3H0]([#8])[CX4H2]      | 0.2032 |
| [#6H2][#7][#6X3]                  | 0.2431 | [#8][#6][#6H2]                    | 0.3472 |
| [#8]=[#6H0][#6H1]                 | 0.2181 | OCC[CH2]                          | 0.4213 |
| [#6H1]                            | 0.2085 | [#7H2][#6H2]                      | 0.4894 |
| [#6H1][#6H2]                      | 0.1645 | [CX4H2][CX4H2]                    | 0.5776 |
| [#8][#6][#6][#6][#6]=[#8]         | 0.1068 | [CX3](=[OX1])O                    | 0.5795 |
| [CX4H3][NX3H1]                    | 0.0998 | [#7][#6H2][#6H2]                  | 0.5921 |
| [CX4H2]([CX4H2])[CX4H2]           | 0.0978 | [#8]=[#6][#8]                     | 0.6398 |

---

Example 69 true smiles: CNCC(=O)O formula: C3H7NO2  
Index of correct structure: 0 of 207  
True structure loss: 0.020239  
True structure:

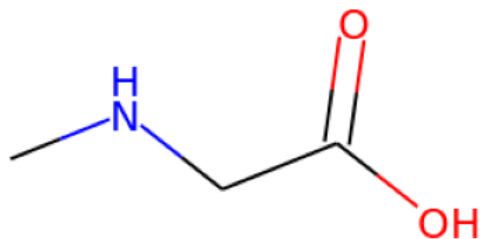

Experimental <sup>13</sup>C NMR (solvent: D2O)



Experimental <sup>1</sup>H NMR (solvent: D2O)

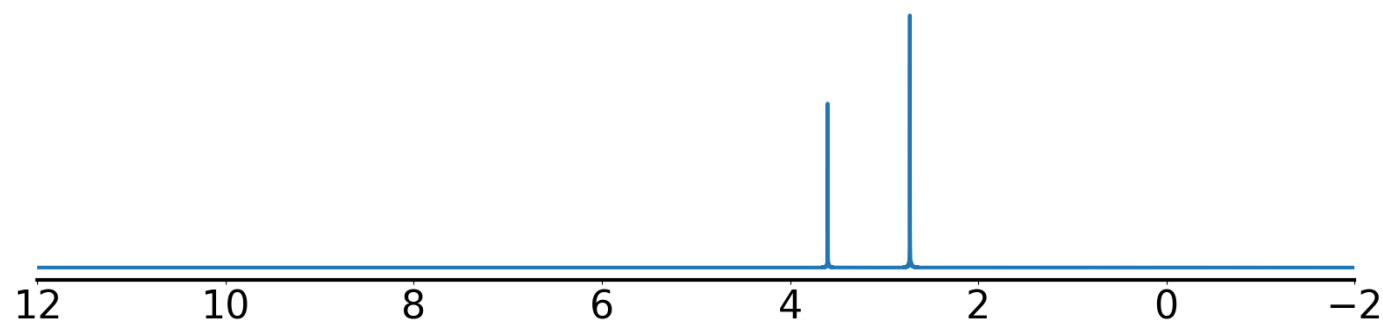

Top predicted structures (loss):

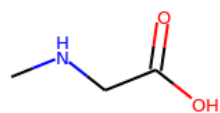

0.020239

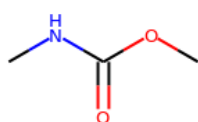

0.030472

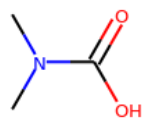

0.032011

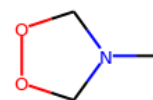

0.033912

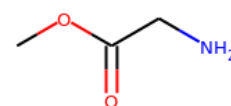

0.03964

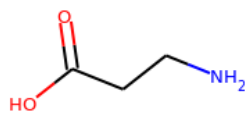

0.048822

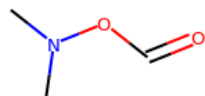

0.048851

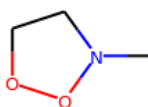

0.05347

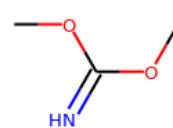

0.057421

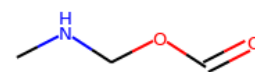

0.057782

| Top predicted substructures       | prob   |                                   |        |
|-----------------------------------|--------|-----------------------------------|--------|
| [CX3](=[OX1])C                    | 0.9853 | [#6H3][#7][#6H2]                  | 0.8383 |
| [#7X3][#6H3]                      | 0.976  | [#7X3][#6H2]                      | 0.8076 |
| [CX4H3]                           | 0.9718 | [CX4H2][CX3]=O                    | 0.807  |
| [#8]=[#6][#8]                     | 0.921  | [CX3](=[OX1])O                    | 0.787  |
| [#6H3][#7]                        | 0.8672 | [#7][#6H2]                        | 0.7753 |
| best positives                    | prob   | best negatives                    | prob   |
| [CX3](=[OX1])C                    | 0.9853 | CCC#CC#C                          | 0.0    |
| [#7X3][#6H3]                      | 0.976  | C=CC=CC#C                         | 0.0    |
| [CX4H3]                           | 0.9718 | C=CCCC#C                          | 0.0    |
| [#8]=[#6][#8]                     | 0.921  | CC=CCC#C                          | 0.0    |
| [#6H3][#7]                        | 0.8672 | CC=CC#CC                          | 0.0    |
| [#6H3][#7][#6H2]                  | 0.8383 | [CX2H0](#[CX2H0])[CX2H0]          | 0.0    |
| [#7X3][#6H2]                      | 0.8076 | [CX3H1](=[CX3H1])[CX2H0]          | 0.0    |
| [CX4H2][CX3]=O                    | 0.807  | [CX2H1]#[CX2H0][CX3H1]=[CX3H0]    | 0.0    |
| [CX3](=[OX1])O                    | 0.787  | [CX2H0](#[CX2H1])[CX3H0]          | 0.0    |
| [#7][#6H2]                        | 0.7753 | [CX2H0](#[CX2H1])[CX4H1]          | 0.0    |
| worst negatives                   | prob   | worst positives                   | prob   |
| [OX1H0]=[CX3H0][OX2H0][CX4H3]     | 0.614  | [CX4H2]([NX3H1])[CX3H0]           | 0.0633 |
| [#6H3][#7][#6X3]                  | 0.5073 | [#6X3][#6H2][#7]                  | 0.4186 |
| [CX4H2][CX4H2]                    | 0.475  | [OX2H1]                           | 0.4278 |
| [CX4H2]CC=O                       | 0.4186 | [CX4H3][NX3H1]                    | 0.4652 |
| [#7][#6H2][#6H2]                  | 0.3836 | [CX3H0](=[OX1H0])([OX2H1])[CX4H2] | 0.577  |
| O=[CX3H0][CX4H2][CX4H2]           | 0.3475 | [#7X3H1]                          | 0.5792 |
| [CX4H3][NX3H0]                    | 0.3352 | [CX3](=O)[OX2H1]                  | 0.6082 |
| [CX4H3][OX2H0]                    | 0.3241 | [#7][#6][#6X3]                    | 0.6231 |
| [#7][#6][#6][#6X3]                | 0.3043 | [#8][#6][#6H2]                    | 0.6499 |
| [CX3H0](=[OX1H0])([NX3H0])[CX4H2] | 0.2809 | [OX1H0]=[CX3H0]([#8])[CX4H2]      | 0.7382 |

---

Example 70 true smiles: CC(=O)OC(C)=O formula: C4H6O3  
Index of correct structure: 0 of 195  
True structure loss: 0.029077  
True structure:

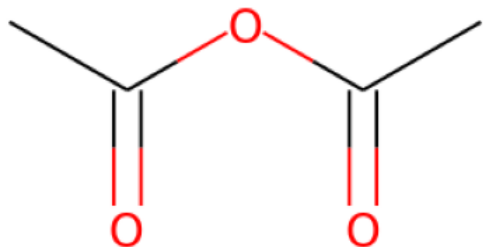

Experimental <sup>13</sup>C NMR (solvent: CDCl<sub>3</sub>)

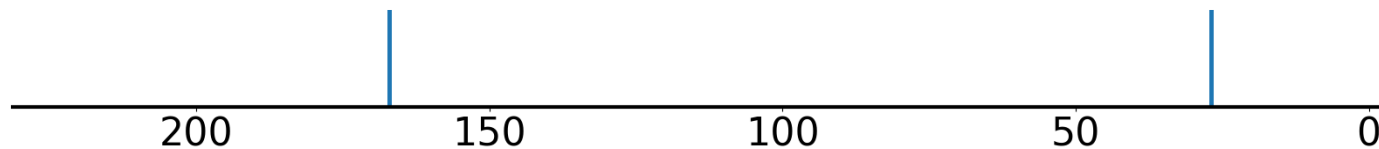

Experimental <sup>1</sup>H NMR (solvent: CDCl<sub>3</sub>)

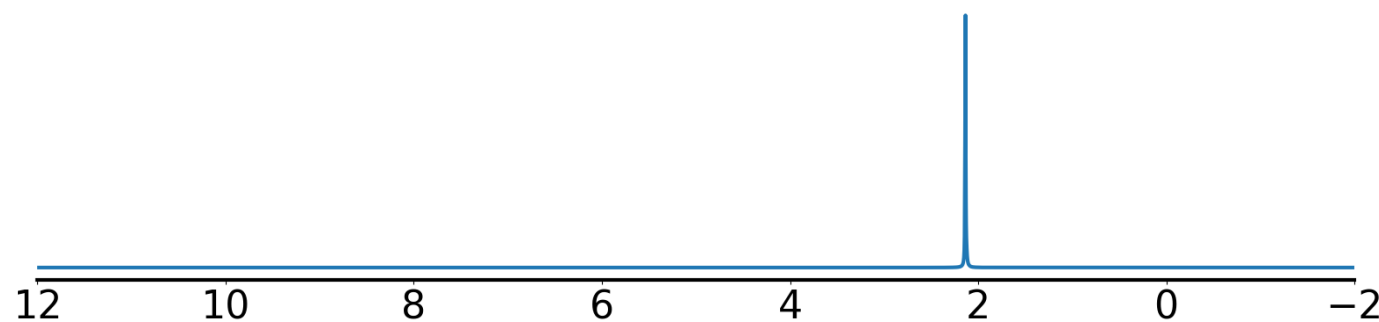

Top predicted structures (loss):

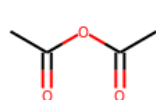

0.029077

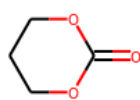

0.053927

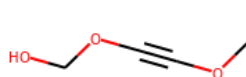

0.057677

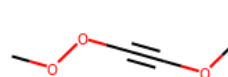

0.058027

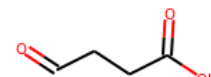

0.064953

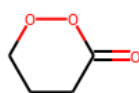

0.070062

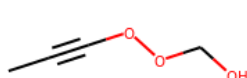

0.073171

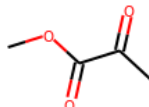

0.075062

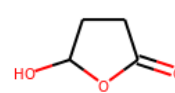

0.083163

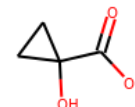

0.086985

|                             |        |                                        |        |
|-----------------------------|--------|----------------------------------------|--------|
| Top predicted substructures | prob   |                                        |        |
| [#8]=[#6][#8]               | 0.9965 | [CX3](=O)[OX2H1]                       | 0.7998 |
| [CX3](=[OX1])O              | 0.9938 | [CX4H2]([#6][#6])                      | 0.7762 |
| [CX3](=[OX1])C              | 0.87   | [CX4H2]([CX4H2])[CX3H0]                | 0.6739 |
| [#6H3][#6H0]                | 0.8477 | [CX4H2]([CX4H2])[CX4H2]                | 0.6167 |
| [CX4H2][CX4H2]              | 0.8324 | [OX2H1]                                | 0.5829 |
| best positives              | prob   | best negatives                         | prob   |
| [#8]=[#6][#8]               | 0.9965 | C=CC=CC#C                              | 0.0    |
| [CX3](=[OX1])O              | 0.9938 | [CX2H0](#[CX2H1])[CX3H0]               | 0.0    |
| [CX3](=[OX1])C              | 0.87   | [CX2H1]#[CX2H0][CX3H1]=[CX3H0]         | 0.0    |
| [#6H3][#6H0]                | 0.8477 | [#6H2]=[#6][#6X2]                      | 0.0    |
| [CX4H3][CX3H0]              | 0.5784 | [#6X3H2]=[#6][#6H2][#8H]               | 0.0    |
| [CX4H3]                     | 0.5464 | [CX3H1](=[CX3H2])[CX3H1]               | 0.0    |
| [CX4H3][#6]                 | 0.2541 | [CX3H0](=[CX3H1])([CX4H1])[CX2H0]      | 0.0    |
| [CX4H3][CX3]                | 0.254  | [OX2H0]1[CX4H2][CX4H1][CX3H0]=[CX3H1]1 | 0.0    |
| [OX1H0]=[CX3H0][CX4H3]      | 0.1749 | [CX2H0](#[CX2H1])[CX4H0]               | 0.0    |
| [OX2H0][CX3H0][CX4H3]       | 0.1211 | CC=CC#C                                | 0.0    |
| worst negatives             | prob   | worst positives                        | prob   |
| [CX4H2][CX4H2]              | 0.8324 | [CX3H0](=[OX1H0])([OX2H0])[CX4H3]      | 0.0254 |
| [CX3](=O)[OX2H1]            | 0.7998 | [CH3][#6][#8]                          | 0.0993 |
| [CX4H2]([#6][#6])           | 0.7762 | [OX2H0][CX3H0][CX4H3]                  | 0.1211 |
| [CX4H2]([CX4H2])[CX3H0]     | 0.6739 | [OX1H0]=[CX3H0][CX4H3]                 | 0.1749 |
| [CX4H2]([CX4H2])[CX4H2]     | 0.6167 | [CX4H3][CX3]                           | 0.254  |
| [OX2H1]                     | 0.5829 | [CX4H3][#6]                            | 0.2541 |
| OCC[CH2]                    | 0.5544 | [CX4H3]                                | 0.5464 |
| O=[CX3H0][CX4H2][CX4H2]     | 0.4449 | [CX4H3][CX3H0]                         | 0.5784 |
| [#8][#6][#6H2]              | 0.4103 | [#6H3][#6H0]                           | 0.8477 |
| [CX4H2][CX3]=O              | 0.3091 | [CX3](=[OX1])C                         | 0.87   |

---

Example 71 true smiles: C=CC(C)(O)CC formula: C6H12O  
 Index of correct structure: 0 of 193  
 True structure loss: 0.007644  
 True structure:

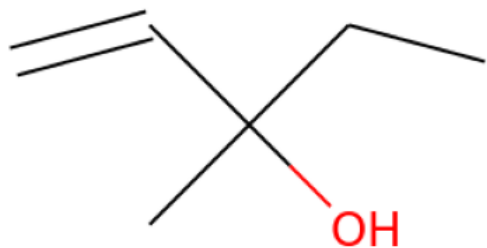

Experimental  $^{13}\text{C}$  NMR (solvent: CDCl3)

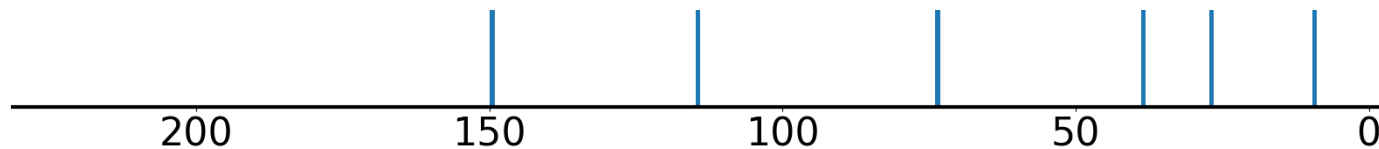

Experimental  $^1\text{H}$  NMR (solvent: CDCl3)

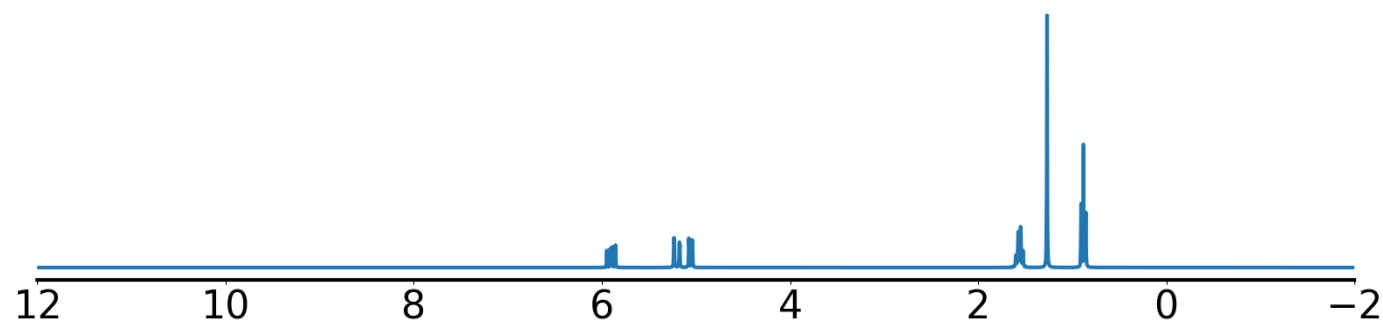

Top predicted structures (loss):

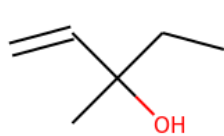

0.007644

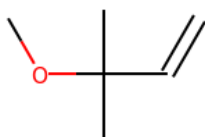

0.057481

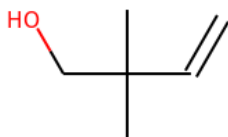

0.058566

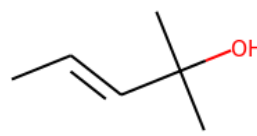

0.08332

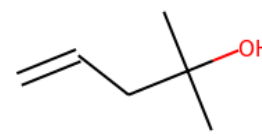

0.084626

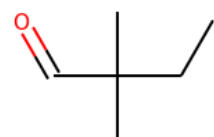

0.096872

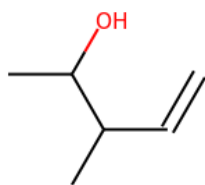

0.098502

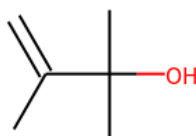

0.100366

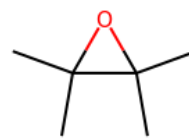

0.105097

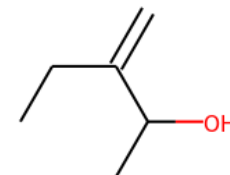

0.111478



|                             |        |                                  |        |
|-----------------------------|--------|----------------------------------|--------|
| Top predicted substructures | prob   |                                  |        |
| [#6H3][#6][#6]              | 1.0    | [CX4H3][CX4]O                    | 0.9977 |
| [CX4H3]                     | 1.0    | [CX3H2]=[CX3H1]                  | 0.9897 |
| [CX4H3][#6]                 | 0.9996 | [#6H3][#6H0]                     | 0.9841 |
| [#6X3H2]                    | 0.999  | [CX4H3][CX4H0]                   | 0.9834 |
| [CX4H3][CX4H2]              | 0.9979 | [OX2H1]                          | 0.9819 |
| best positives              | prob   | best negatives                   | prob   |
| [#6H3][#6][#6]              | 1.0    | [CX2H0](#[CX2H1])[CX3H0]         | 0.0    |
| [CX4H3]                     | 1.0    | [CX2H0](#[CX2H0])[CX2H0]         | 0.0    |
| [CX4H3][#6]                 | 0.9996 | [#6X2][#6H1][#6X2]               | 0.0    |
| [#6X3H2]                    | 0.999  | CCC#CC#C                         | 0.0    |
| [CX4H3][CX4H2]              | 0.9979 | CC#CCC#C                         | 0.0    |
| [CX4H3][CX4]O               | 0.9977 | C=CC=CC#C                        | 0.0    |
| [CX3H2]=[CX3H1]             | 0.9897 | CC=CCC#C                         | 0.0    |
| [#6H3][#6H0]                | 0.9841 | [CX4H1]([OX2H0])([CX4H1])[CX2H0] | 0.0    |
| [CX4H3][CX4H0]              | 0.9834 | [CX2H0](#[CX2H1])[CX4H2]         | 0.0    |
| [OX2H1]                     | 0.9819 | [CX2H1]#[CX2H0][CX3H1]=[CX3H0]   | 0.0    |
| worst negatives             | prob   | worst positives                  | prob   |
| [CHX4]([CH3X4])[CH2X4]      | 0.3003 | [#8][#6][#6H2]                   | 0.589  |
| [#8][#6][#6][#6X3]          | 0.2464 | [CH3]CC[OH]                      | 0.5959 |
| [O][CX3H1]=[CX3H1]          | 0.2399 | [OX2H1][CX4H0][CX4H2][CX4H3]     | 0.6398 |
| [CX3H](O)                   | 0.2364 | [CX4H2]([CX4H3])[CX4H0]          | 0.7549 |
| [OH][CX4H]                  | 0.2354 | [CX3H2]=[CX3H1][CX4H0][OX2H1]    | 0.7929 |
| CCCC=C                      | 0.2063 | [CX4H2]([#6])[#6]                | 0.7934 |
| [CX4H]O                     | 0.1795 | [#6H3][#6][#6][#6H3]             | 0.8481 |
| [CX3H2]=[CX3H0]             | 0.1731 | [CH3][#6][#8]                    | 0.8698 |
| [CX3H1](=[CX3H1])[OX2H0]    | 0.1603 | [#6X3][#6][#6][#6H3]             | 0.8837 |
| O[CX4H][CX4H2]              | 0.1583 | [#8][#6H0][#6H1]                 | 0.8858 |

---

Example 72 true smiles: Cc1ncc[nH]1 formula: C4H6N2  
Index of correct structure: 5 of 177  
True structure loss: 0.034547  
True structure:

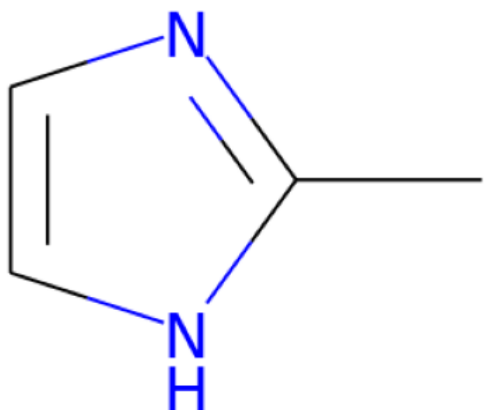

Experimental <sup>13</sup>C NMR (solvent: CDCl<sub>3</sub>)

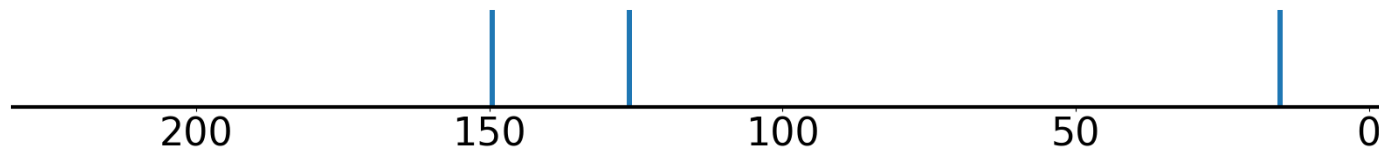

Experimental <sup>1</sup>H NMR (solvent: CDCl<sub>3</sub>)

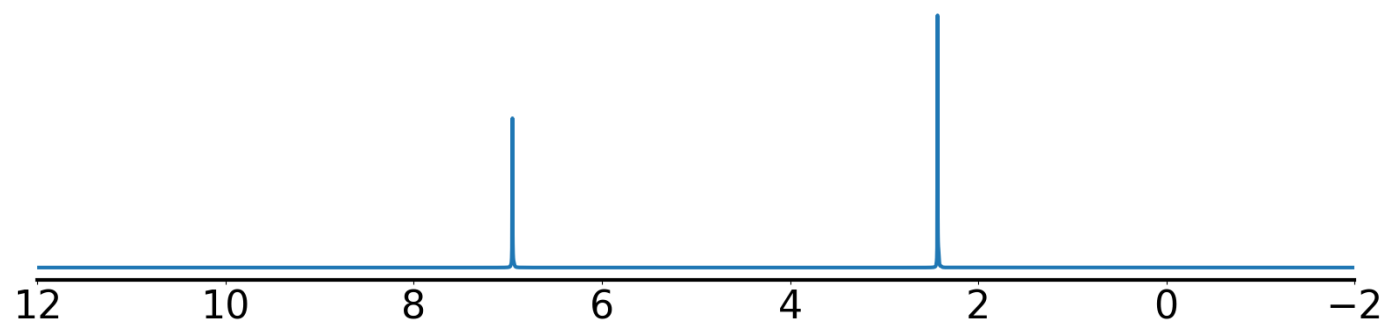

Top predicted structures (loss):

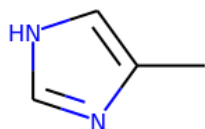

0.019913

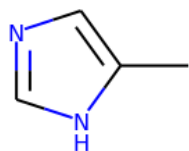

0.020212

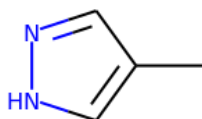

0.032869

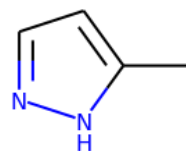

0.034049

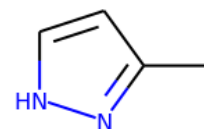

0.034259

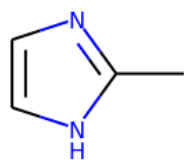

0.034547

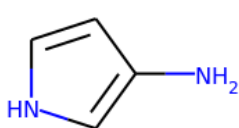

0.059508

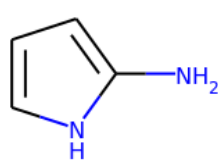

0.061591

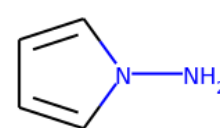

0.067517

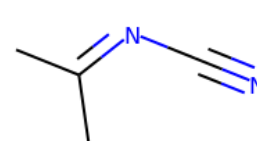

0.077065

| Top predicted substructures | prob   |                                        | prob   |
|-----------------------------|--------|----------------------------------------|--------|
| [CX4H3]                     | 0.9951 | [CX4H3][cX3H0]                         | 0.9622 |
| [#6X3][#6X3]                | 0.9889 | [#6H3][#6][#6]                         | 0.9597 |
| [#6H3][#6H0]                | 0.9849 | [cH]                                   | 0.9466 |
| [CX4H3][#6]                 | 0.9787 | [#6H3][#6][#6X3]                       | 0.9449 |
| [#7][#6][#6X3]              | 0.9694 | [#6H1]                                 | 0.9061 |
| best positives              | prob   | best negatives                         | prob   |
| [CX4H3]                     | 0.9951 | [OX2H0]1[CX4H2][CX4H2][CX4H1][CX4H1]1  | 0.0    |
| [#6X3][#6X3]                | 0.9889 | [#8][#6H1][#6H2][#6H1]=[#8]            | 0.0    |
| [#6H3][#6H0]                | 0.9849 | [OX1H0]=[CX3H0]1[CX4H1][CX4H1][CX4H2]1 | 0.0    |
| [CX4H3][#6]                 | 0.9787 | [OX2H0][CX4H2][CX4H2][CX4H1][OX2H0]    | 0.0    |
| [#7][#6][#6X3]              | 0.9694 | [OX2H1][CX4H1][CX4H1]([CX4H2])[CX4H2]  | 0.0    |
| [CX4H3][cX3H0]              | 0.9622 | [OX2H1][CX4H1]1[CX4H1][CX4H2][CX4H1]1  | 0.0    |
| [cH]                        | 0.9466 | [OX2H0][CX4H2][CX4H0][OX2H0]           | 0.0    |
| [#6H1]                      | 0.9061 | [OX2H0]1[CX4H2][CX4H1][CX4H1]1         | 0.0    |
| [#6X3][#7][#6X3]            | 0.8846 | [CX4H1]([OX2H0])([CX4H2])[CX2H0]       | 0.0    |
| [#6]1[#6][#7][#6][#7]1      | 0.8077 | [OX2H0][CX4H2][CX4H1]([CX4H1])[CX3H1]  | 0.0    |
| worst negatives             | prob   | worst positives                        | prob   |
| [#6H3][#6][#6]              | 0.9597 | [cX3H1]([nX2H0])[cX3H1]                | 0.0539 |
| [#6H3][#6][#6X3]            | 0.9449 | [cX3H1]([nX3H1])[cX3H1]                | 0.0701 |
| [#6X3H1][#6X3H0]            | 0.8633 | [#6H1][#6H1]                           | 0.2603 |
| [#6H3][#6H0][#6H1][#7]      | 0.6748 | [#7H][#6X3H1]                          | 0.3819 |
| [#7][#6H0][#6H1]            | 0.6646 | [cH][cH]                               | 0.4891 |
| [#7][#6X3H0][#6X3H1]        | 0.6564 | [#7X3H1]                               | 0.5261 |
| [#7][#6][#6][#6X3]          | 0.6393 | [#7][#6H0][#7]                         | 0.6467 |
| [#6X3][#6][#6][#6H3]        | 0.6266 | [#6H1r5][#7]                           | 0.6611 |
| [#7X3H2]                    | 0.5322 | [#7][#6][#6H3]                         | 0.6726 |
| [#7][#6H1][#7]              | 0.4653 | [#7][#6][#6][#7]                       | 0.7194 |

---

Example 73 true smiles: CC(C)(O)C(=O)O formula: C4H8O3  
Index of correct structure: 0 of 172  
True structure loss: 0.010936  
True structure:

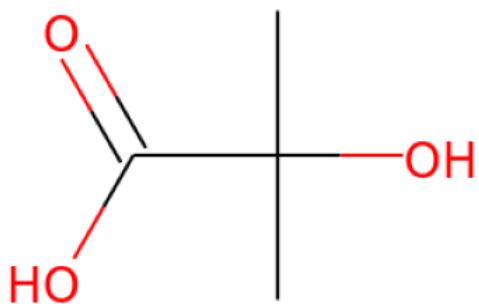

Experimental <sup>13</sup>C NMR (solvent: CDCl<sub>3</sub>)

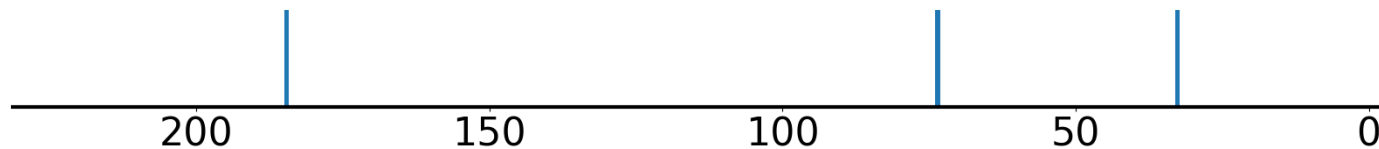

Experimental <sup>1</sup>H NMR (solvent: d<sub>2</sub>o)

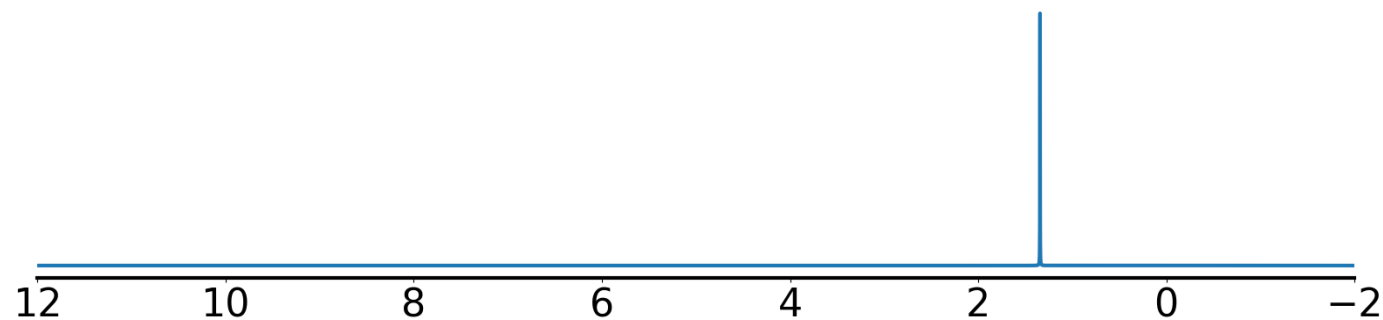

Top predicted structures (loss):

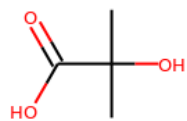

0.010936

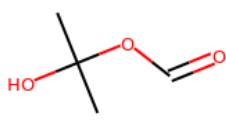

0.035745

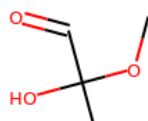

0.059714

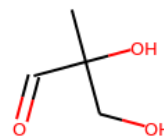

0.062249

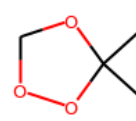

0.062402

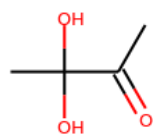

0.063627

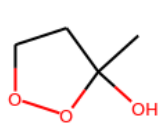

0.066481

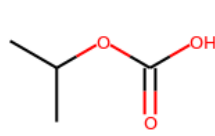

0.06793

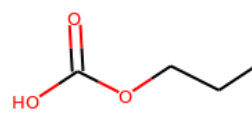

0.080043

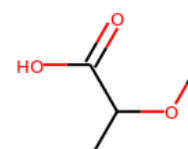

0.083611

|                                   |        |                                   |        |
|-----------------------------------|--------|-----------------------------------|--------|
| Top predicted substructures       | prob   |                                   |        |
| [CX4H3]                           | 0.9964 | [OX2H1]                           | 0.9779 |
| [#6H3][#6][#6]                    | 0.9959 | [#8]=[#6][#8]                     | 0.9721 |
| [CX3](=[OX1])C                    | 0.9955 | [CX3](=[OX1])O                    | 0.9631 |
| [CX4H3][CX4H0][CX4H3]             | 0.9947 | [#6H3][#6H0]                      | 0.9605 |
| [CX4H3][CX4H0]                    | 0.99   | [CX4H3][CX4]O                     | 0.9398 |
| best positives                    | prob   | best negatives                    | prob   |
| [CX4H3]                           | 0.9964 | CC=CC#CC                          | 0.0    |
| [#6H3][#6][#6]                    | 0.9959 | [CX2H1]#[CX2H0][CX3H1]=[CX3H0]    | 0.0    |
| [CX3](=[OX1])C                    | 0.9955 | C=CCC#C                           | 0.0    |
| [CX4H3][CX4H0][CX4H3]             | 0.9947 | C=CC=CC#C                         | 0.0    |
| [CX4H3][CX4H0]                    | 0.99   | CCC=CC#C                          | 0.0    |
| [OX2H1]                           | 0.9779 | CC=CCC#C                          | 0.0    |
| [#8]=[#6][#8]                     | 0.9721 | [#6H2]=[#6][#6X2]                 | 0.0    |
| [CX3](=[OX1])O                    | 0.9631 | [CX3H1](=[CX3H2])[CX2H0]          | 0.0    |
| [#6H3][#6H0]                      | 0.9605 | [CX3H0](=[CX3H1])([CX4H1])[CX2H0] | 0.0    |
| [CX4H3][CX4]O                     | 0.9398 | CCC#CC=C                          | 0.0    |
| worst negatives                   | prob   | worst positives                   | prob   |
| [CX4]([CX4H3])([CX4H3])[CX4H3]    | 0.6283 | [#6H3][#6][#6X3]                  | 0.4128 |
| [CX4H2][CX3]=O                    | 0.2579 | [#8][#6][#6][#8]                  | 0.4366 |
| [#8]=[#6H0][#6H1]                 | 0.2424 | [OX1H0]=[CX3H0][CX4H0][CX4H3]     | 0.4372 |
| [CX4H2]CC=O                       | 0.1774 | [CH3]CC[OH]                       | 0.4975 |
| [#8][#6][#6][#6X3]                | 0.1603 | [OX2H1][CX4H0][CX4H3]             | 0.5635 |
| OCC[CH2]                          | 0.1602 | [#8][#6][#6]=[#8]                 | 0.6669 |
| [#8][#6][#6H2]                    | 0.1532 | [#6X4H3][#6][#8H]                 | 0.7006 |
| [#8]=[#6][#6]=[#8]                | 0.1525 | [CH3][#6][#8]                     | 0.7295 |
| O=[CX3][CX4H]                     | 0.1477 | [CX3](=O)[OX2H1]                  | 0.8732 |
| [CX3H0](=[OX1H0])([OX2H0])[CX4H0] | 0.1473 | [#6H0]([#6H3])([#6H3])[#8]        | 0.8876 |

---

Example 74 true smiles: CC(CO)C(=O)O formula: C4H8O3  
Index of correct structure: 0 of 172  
True structure loss: 0.028466  
True structure:

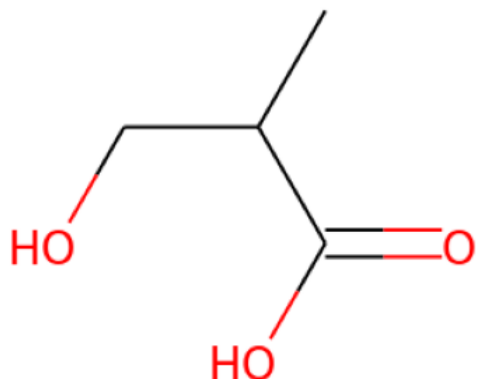

Experimental <sup>13</sup>C NMR (solvent: CDCl<sub>3</sub>)

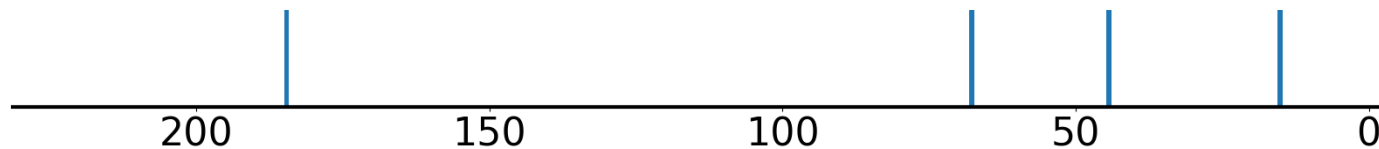

Experimental <sup>1</sup>H NMR (solvent: D<sub>2</sub>O)

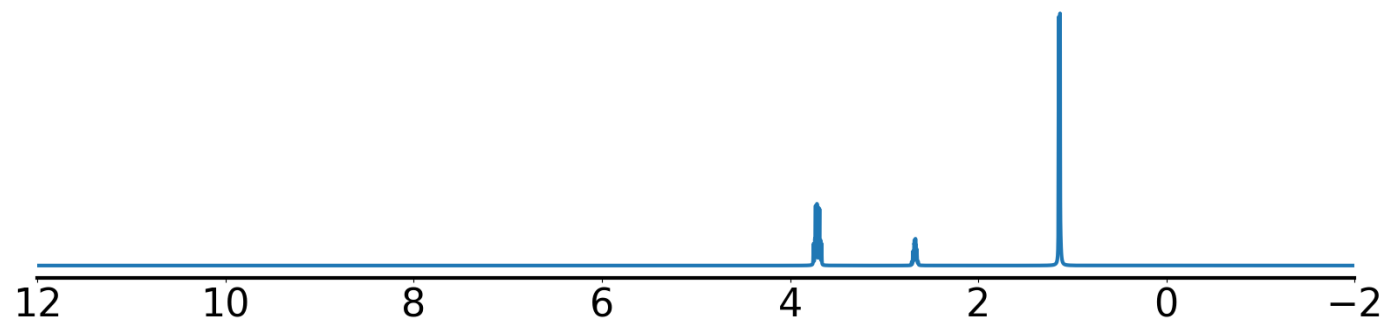

Top predicted structures (loss):

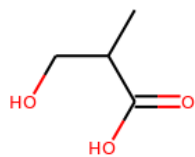

0.028466

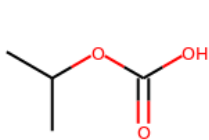

0.071441

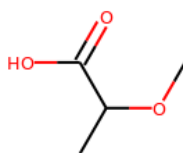

0.071878

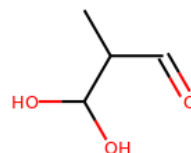

0.077025

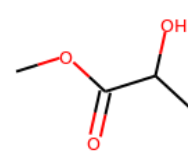

0.077177

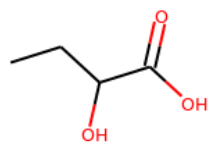

0.078321

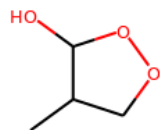

0.078839

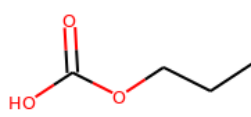

0.078956

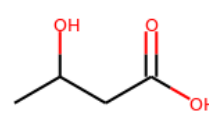

0.092249

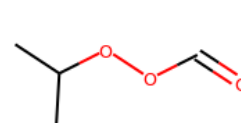

0.096201

|                                        |        |                                        |        |
|----------------------------------------|--------|----------------------------------------|--------|
| Top predicted substructures            | prob   |                                        |        |
| [CX4H3]                                | 0.9999 | [CX3](=[OX1])O                         | 0.9869 |
| [CX3](=[OX1])C                         | 0.9988 | [CX3](=O)[OX2H1]                       | 0.9824 |
| [OX2H1]                                | 0.9988 | [#6H1]                                 | 0.9807 |
| [CX4H3][#6]                            | 0.9963 | O=[CX3][CX4H]                          | 0.965  |
| [#8]=[#6][#8]                          | 0.9906 | [#8]=[#6H0][#6H1]                      | 0.9464 |
| best positives                         | prob   | best negatives                         | prob   |
| [CX4H3]                                | 0.9999 | [CX2H1]#[CX2H0][CX3H1]=[CX3H0]         | 0.0    |
| [CX3](=[OX1])C                         | 0.9988 | CC=CC#CC                               | 0.0    |
| [OX2H1]                                | 0.9988 | CC=CCC#C                               | 0.0    |
| [CX4H3][#6]                            | 0.9963 | C=CC=CC#C                              | 0.0    |
| [#8]=[#6][#8]                          | 0.9906 | CCC=CC#C                               | 0.0    |
| [CX3](=[OX1])O                         | 0.9869 | CC#CCC=C                               | 0.0    |
| [CX3](=O)[OX2H1]                       | 0.9824 | [CX2H0](#[CX2H1])[CX4H0]               | 0.0    |
| [#6H1]                                 | 0.9807 | [CX2H0](#[CX2H1])[cX3H0]               | 0.0    |
| O=[CX3][CX4H]                          | 0.965  | CCC#CC#C                               | 0.0    |
| [#8]=[#6H0][#6H1]                      | 0.9464 | [CX2H0](#[CX2H1])[CX3H1]               | 0.0    |
| worst negatives                        | prob   | worst positives                        | prob   |
| [#8]=[#6][#6H1][#6H1]                  | 0.8852 | [OX1H0]=[CX3H0][CX4H1]([CX4H3])[CX4H2] | 0.0281 |
| [#6H1][#6H1]                           | 0.6724 | OCC[CH2]                               | 0.2063 |
| [OX1H0]=[CX3H0][CX4H1]([CX4H1])[CX4H3] | 0.6681 | [CX4H1]([CX4H3])([CX4H2])[CX3H0]       | 0.2209 |
| [CX4H1]([CX4H3])([CX4H1])[CX3H0]       | 0.5862 | [#8][#6H2][#6H][#6X3]                  | 0.2225 |
| [#8][#6H1][#6H1][#6H3]                 | 0.374  | [#8][#6H2][#6H1][#6H0]                 | 0.2362 |
| [OH][CX4H]                             | 0.3591 | [CHX4]([CH3X4])[CH2X4]                 | 0.2928 |
| [#8][#6][#6][#6][#6]=[#8]              | 0.3227 | [CX4H2]CC=O                            | 0.3623 |
| [#8][#6H1][#6H1]                       | 0.3136 | [CX4H2](O)[CHX4]                       | 0.3667 |
| [#6X3][#6][#6][#6H3]                   | 0.2885 | [#8H][#6H2][#6H1]                      | 0.4372 |
| [CX4H1]([OX2H1])([CX4H3])[CX4H1]       | 0.2401 | [#6H1][#6H2]                           | 0.5085 |

---

Example 75 true smiles: CCC(O)C(=O)O formula: C4H8O3  
Index of correct structure: 0 of 172  
True structure loss: 0.021028  
True structure:

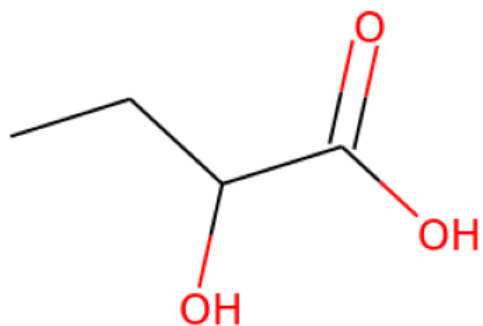

Experimental <sup>13</sup>C NMR (solvent: CDCl<sub>3</sub>)

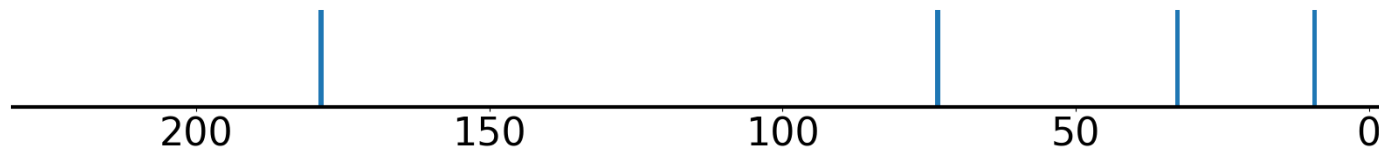

Experimental <sup>1</sup>H NMR (solvent: d<sub>2</sub>o)

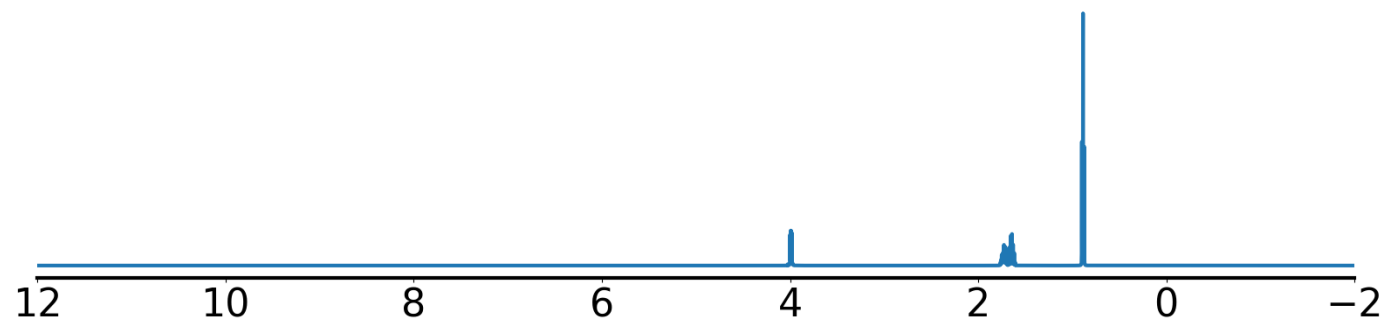

Top predicted structures (loss):

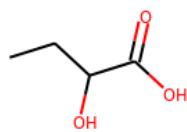

0.021028

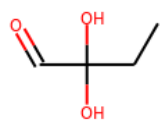

0.049342

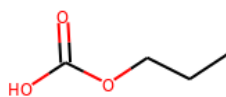

0.053294

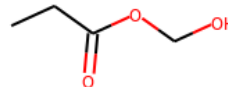

0.058771

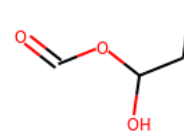

0.060748

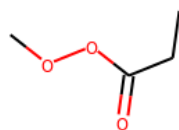

0.071974

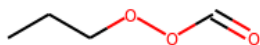

0.072581

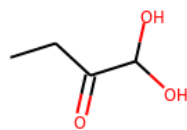

0.075985

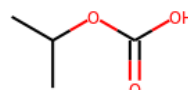

0.090438

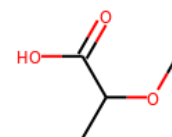

0.091313



| Top predicted substructures       | prob        |                                   |             |
|-----------------------------------|-------------|-----------------------------------|-------------|
| [CX4H3]                           | 0.9997      | [CX4H2]([#6])[#6]                 | 0.9969      |
| [#6H3][#6][#6]                    | 0.9988      | [CX4H3][#6]                       | 0.9959      |
| [CX3](=[OX1])C                    | 0.998       | [CX3](=[OX1])O                    | 0.9951      |
| [#8]=[#6][#8]                     | 0.9971      | [OX2H1]                           | 0.9902      |
| [CX4H3][CX4H2]                    | 0.9969      | [#8][#6][#6H2]                    | 0.9749      |
| <b>best positives</b>             | <b>prob</b> | <b>best negatives</b>             | <b>prob</b> |
| [CX4H3]                           | 0.9997      | CC=CC#CC                          | 0.0         |
| [#6H3][#6][#6]                    | 0.9988      | [CX2H1]#[CX2H0][CX3H1]=[CX3H0]    | 0.0         |
| [CX3](=[OX1])C                    | 0.998       | [CX3H1](=[CX3H2])[CX2H0]          | 0.0         |
| [#8]=[#6][#8]                     | 0.9971      | CCC#CC#C                          | 0.0         |
| [CX4H3][CX4H2]                    | 0.9969      | [CX3H0](=[CX3H1])([CX4H1])[CX2H0] | 0.0         |
| [CX4H2]([#6])[#6]                 | 0.9969      | CCC#CC=C                          | 0.0         |
| [CX4H3][#6]                       | 0.9959      | [#6X2][#6H1][#6X2]                | 0.0         |
| [CX3](=[OX1])O                    | 0.9951      | C=CC=CC#C                         | 0.0         |
| [OX2H1]                           | 0.9902      | [CX3H0](=[CX3H1])([CX4H2])[CX2H0] | 0.0         |
| [#8][#6][#6H2]                    | 0.9749      | CC#CCC#C                          | 0.0         |
| <b>worst negatives</b>            | <b>prob</b> | <b>worst positives</b>            | <b>prob</b> |
| [OX2H1][CX4H0][CX4H2][CX4H3]      | 0.8867      | [CX4H2]([CX4H3])[CX4H1]           | 0.0687      |
| [CX4H2]([CX4H3])[CX4H0]           | 0.6733      | [#6H1][#6H2]                      | 0.3109      |
| [#8][#6][#6][#6X3]                | 0.3545      | [CX3H0](=[OX1H0])([OX2H1])[CX4H1] | 0.344       |
| [CX4H2][CX3]=O                    | 0.305       | [#8][#6H0][#6H1]                  | 0.451       |
| [OX1H0]=[CX3H0]([#8])[CX4H2]      | 0.2117      | [#6X4H2][#6H1][#8H]               | 0.4582      |
| [CX3H0](=[OX1H0])([OX2H0])[CX4H0] | 0.1602      | [CX4H](O)CO                       | 0.4609      |
| [#8][#6][#6H2][#8]                | 0.1396      | [#8]=[#6H0][#6H1]                 | 0.495       |
| [CX4H2]([#6])[O]                  | 0.1276      | [OH][CX4H]                        | 0.5045      |
| [CX4H2]([CX4H3])[CX3H0]           | 0.1192      | O[CX4H][CX4H2]                    | 0.5068      |
| [#6H3][#6][#6X3]                  | 0.1018      | O=[CX3][CX4H]                     | 0.5208      |

---

Example 76 true smiles: CCCCCCO formula: C8H18O  
Index of correct structure: 0 of 171  
True structure loss: 0.008491  
True structure:

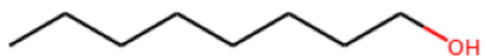

Experimental <sup>13</sup>C NMR (solvent: CDCl<sub>3</sub>)

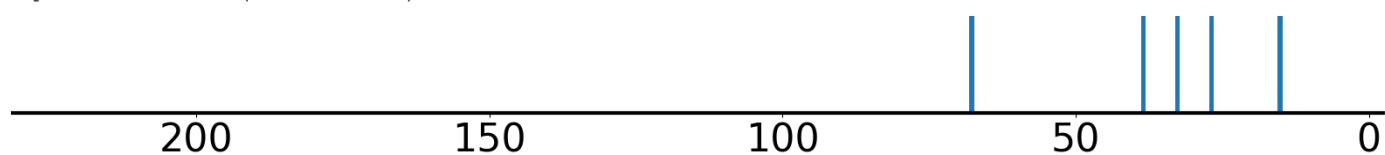

Experimental <sup>1</sup>H NMR (solvent: MeOD)

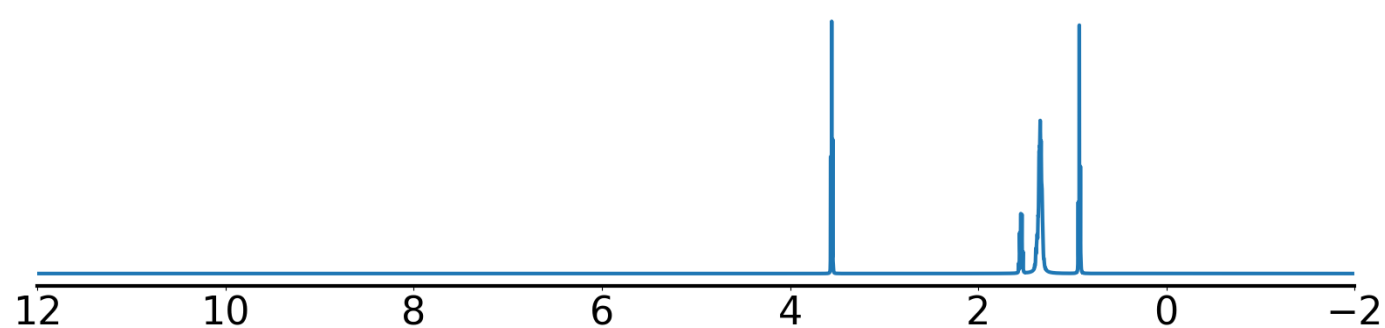

Top predicted structures (loss):

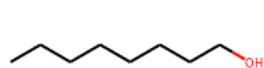

0.008491

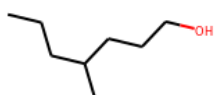

0.02378

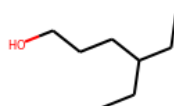

0.023828

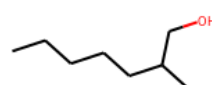

0.024177

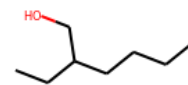

0.025258

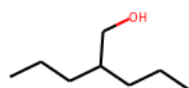

0.025781

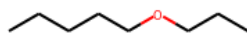

0.02613

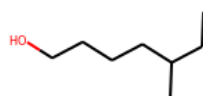

0.02635

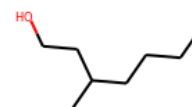

0.027431

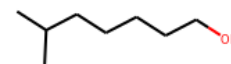

0.027628

|                                       |        |                                   |        |
|---------------------------------------|--------|-----------------------------------|--------|
| Top predicted substructures           | prob   |                                   |        |
| [CX4H2]([#6])[O]                      | 0.9997 | [CX4H3][CX4H2]                    | 0.9951 |
| [CX4H2]([#6])[#6]                     | 0.9994 | [CX4H2][CX4H2][CX4H2][CX4H2]      | 0.9875 |
| [CX4H3]                               | 0.9992 | [CX4H2]([CX4H2])[CX4H2]           | 0.9691 |
| [CX4H3][#6]                           | 0.9989 | [CX4H2][CX4H2]                    | 0.9627 |
| [#6H3][#6][#6]                        | 0.9989 | OCC[CH2]                          | 0.9258 |
| best positives                        | prob   | best negatives                    | prob   |
| [CX4H2]([#6])[O]                      | 0.9997 | [CX2H0](#[CX2H1])[CX3H0]          | 0.0    |
| [CX4H2]([#6])[#6]                     | 0.9994 | [CX2H1]#[CX2H0][CX3H1]=[CX3H0]    | 0.0    |
| [CX4H3]                               | 0.9992 | #[6X2][#6H1][#6X2]                | 0.0    |
| [CX4H3][#6]                           | 0.9989 | C=CC=CC#C                         | 0.0    |
| [#6H3][#6][#6]                        | 0.9989 | [CX3H0](=[CX3H1])([CX4H2])[CX2H0] | 0.0    |
| [CX4H3][CX4H2]                        | 0.9951 | C=CCCC#C                          | 0.0    |
| [CX4H2][CX4H2][CX4H2][CX4H2]          | 0.9875 | [CX3H0](=[CX3H1])([OX2H0])[CX2H0] | 0.0    |
| [CX4H2]([CX4H2])[CX4H2]               | 0.9691 | #[7][#6]=[#6][#6][#7]             | 0.0    |
| [CX4H2][CX4H2]                        | 0.9627 | [CX3H0](=[CX3H1])([CX4H1])[CX2H0] | 0.0    |
| OCC[CH2]                              | 0.9258 | [CX2H0](#[CX2H1])[CX4H2]          | 0.0    |
| worst negatives                       | prob   | worst positives                   | prob   |
| [CX4H2]([OX2H1])[CX4H1]               | 0.7466 | [CX4H2]([OX2H1])[CX4H2]           | 0.5119 |
| [#6H1][#6H2]                          | 0.5345 | #[8][#6][#6H2]                    | 0.5598 |
| #[8H][#6H2][#6H1]                     | 0.4214 | [CH2X4](O)[CX4H2]                 | 0.68   |
| [#6H1]                                | 0.4102 | [CH2X4](O)[CX4H2][CX4H2]          | 0.7251 |
| [OX2H1][CX4H2][CX4H1]([CX4H2])[CX4H2] | 0.3709 | CCCCC                             | 0.7923 |
| [CX4H3][CX4H1]                        | 0.2589 | [CX4H2]([CX4H3])[CX4H2]           | 0.8484 |
| [CX4H2](O)[CHX4]                      | 0.2118 | [OX2H1]                           | 0.918  |
| [CX4H1]([CX4H2])([CX4H2])[CX4H2]      | 0.1828 | OCC[CH2]                          | 0.9258 |
| #[6H1]([#6H2])[#6H2]                  | 0.1468 | [CX4H2][CX4H2]                    | 0.9627 |
| [CHX4]([CH3X4])[CH2X4]                | 0.1073 | [CX4H2]([CX4H2])[CX4H2]           | 0.9691 |

---

Example 77 true smiles: NCCCCCO formula: C5H13NO  
Index of correct structure: 0 of 152  
True structure loss: 0.008112  
True structure:

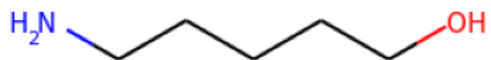

Experimental <sup>13</sup>C NMR (solvent: CDCl<sub>3</sub>)

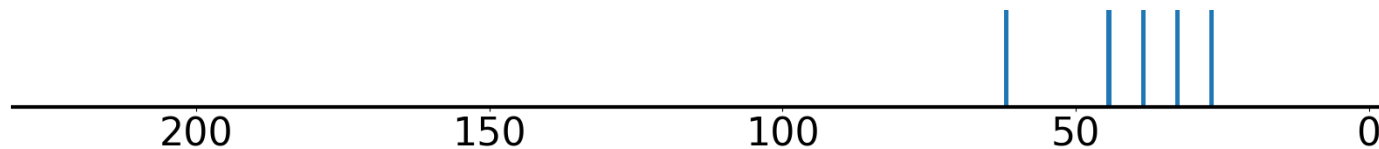

Experimental <sup>1</sup>H NMR (solvent: CDCl<sub>3</sub>)

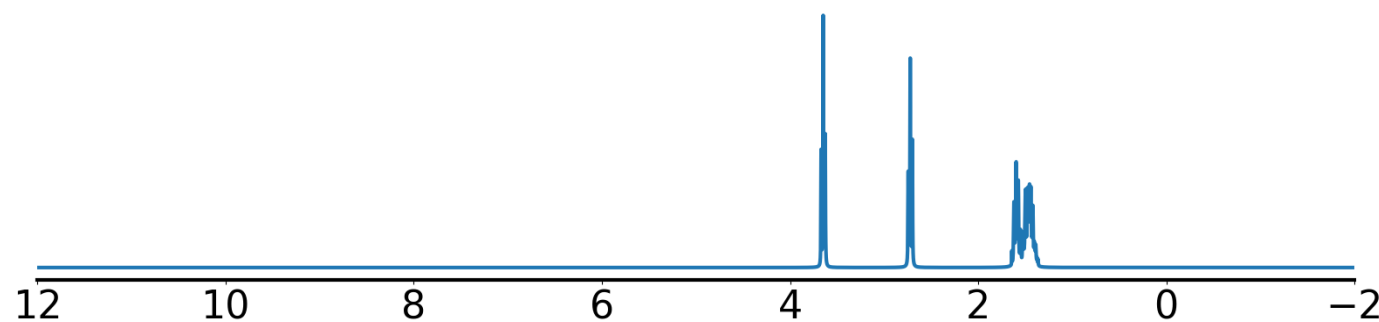

Top predicted structures (loss):

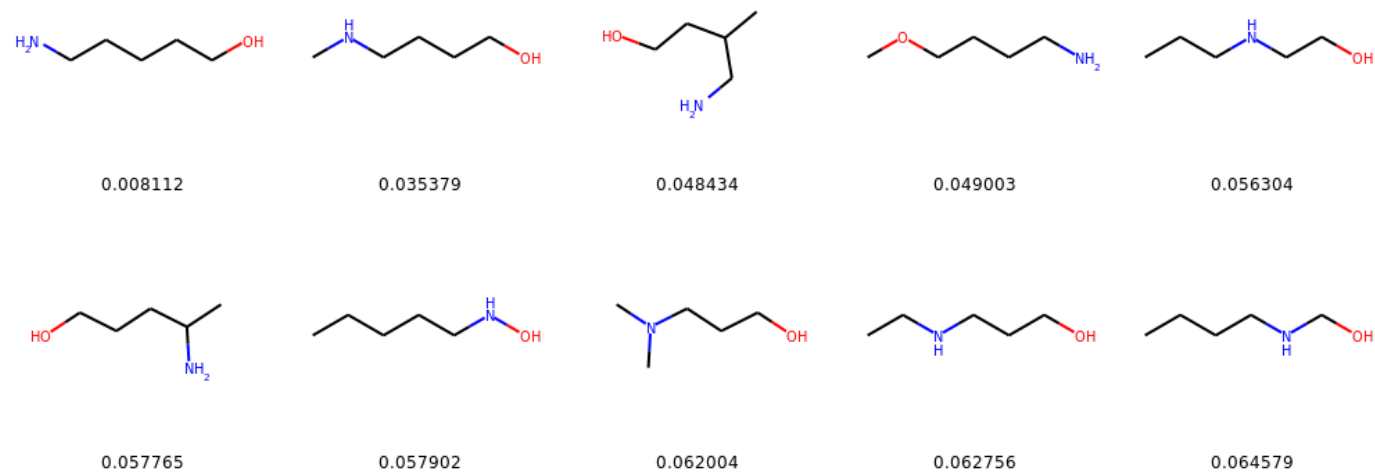

|                             |        |                                   |        |
|-----------------------------|--------|-----------------------------------|--------|
| Top predicted substructures | prob   |                                   |        |
| [CX4H2]([#6])[#6]           | 0.9998 | [#7][#6H2]                        | 0.978  |
| [CX4H2][CX4H2]              | 0.9959 | [CX4H2]([CX4H2])[CX4H2]           | 0.9756 |
| [CX4H2]([OX2H1])[CX4H2]     | 0.9934 | [#7H2][#6H2]                      | 0.9756 |
| [OX2H1]                     | 0.9925 | [#7X3][#6H2]                      | 0.9543 |
| [CX4H2]([#6])[O]            | 0.9841 | [#7X3H2]                          | 0.9275 |
| best positives              | prob   | best negatives                    | prob   |
| [CX4H2]([#6])[#6]           | 0.9998 | C=CC=CC#C                         | 0.0    |
| [CX4H2][CX4H2]              | 0.9959 | [CX2H0](#[CX2H1])[cX3H0]          | 0.0    |
| [CX4H2]([OX2H1])[CX4H2]     | 0.9934 | [CX3H0](=[CX3H1])([OX2H0])[CX2H0] | 0.0    |
| [OX2H1]                     | 0.9925 | CCC=CC#C                          | 0.0    |
| [CX4H2]([#6])[O]            | 0.9841 | [CX2H1]#[CX2H0][CX3H1]=[CX3H0]    | 0.0    |
| [#7][#6H2]                  | 0.978  | [CX2H0](#[CX2H0])[CX2H0]          | 0.0    |
| [CX4H2]([CX4H2])[CX4H2]     | 0.9756 | C=CCCC#C                          | 0.0    |
| [#7H2][#6H2]                | 0.9756 | [#6X2][#6H1][#6X2]                | 0.0    |
| [#7X3][#6H2]                | 0.9543 | [CX2H0](#[CX2H1])[CX4H1]          | 0.0    |
| [#7X3H2]                    | 0.9275 | CCC#CC#C                          | 0.0    |
| worst negatives             | prob   | worst positives                   | prob   |
| [CX4H2]([CX4H2])[CX4H1]     | 0.7334 | [CH2X4](O)[CX4H2][CX4H2]          | 0.3373 |
| [#6H1]                      | 0.3908 | [#8][#6][#6H2]                    | 0.6898 |
| [#6H1][#6H2]                | 0.3426 | OCC[CH2]                          | 0.7685 |
| [#6H1](#[6H2])[#6H2]        | 0.2877 | [CH2X4](O)[CX4H2]                 | 0.8428 |
| [#7X3H1]                    | 0.2846 | [#7][#6H2][#6H2]                  | 0.8809 |
| [CX4H2]([NX3H1])[CX4H2]     | 0.2522 | [CX4H2]([NX3H2])[CX4H2]           | 0.8812 |
| CCCCC                       | 0.2318 | [CX4H2][CX4H2][CX4H2][CX4H2]      | 0.923  |
| [#8H][#6H2][#6H1]           | 0.2017 | [#7X3H2]                          | 0.9275 |
| [CX4H2]([OX2H1])[CX4H1]     | 0.1515 | [#7X3][#6H2]                      | 0.9543 |
| [CX4H2](O)[CHX4]            | 0.1313 | [#7H2][#6H2]                      | 0.9756 |

---

Example 78 true smiles: CC(=O)C(C)O formula: C4H8O2  
Index of correct structure: 0 of 72  
True structure loss: 0.008046  
True structure:

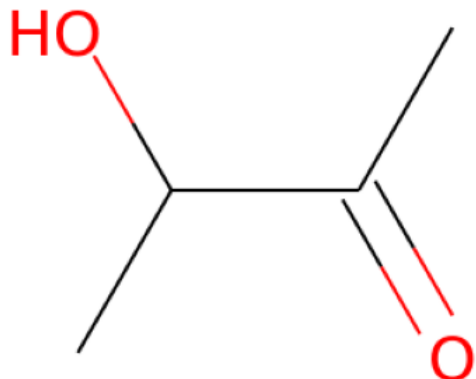

Experimental <sup>13</sup>C NMR (solvent: CDCl<sub>3</sub>)

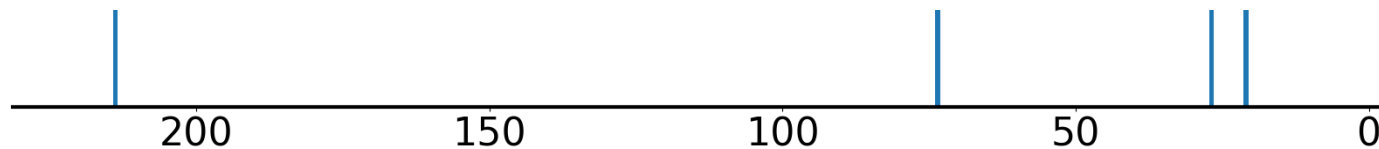

Experimental <sup>1</sup>H NMR (solvent: D<sub>2</sub>O)

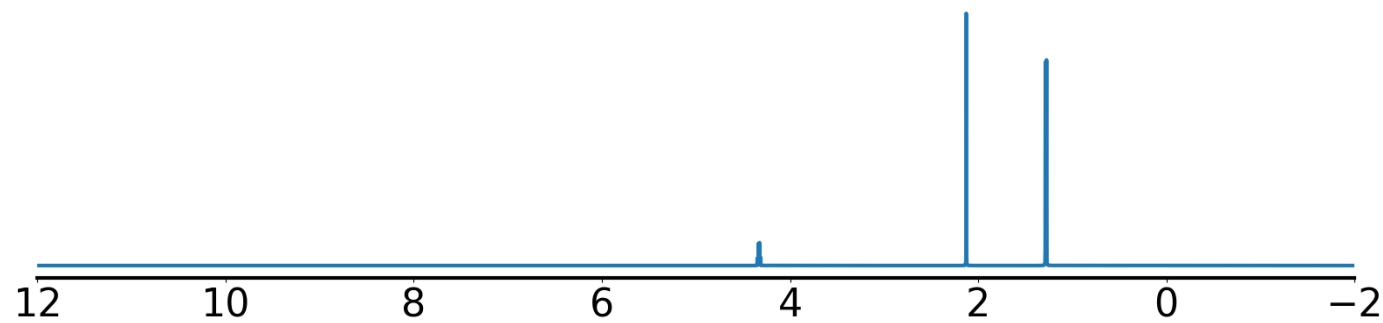

Top predicted structures (loss):

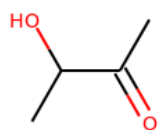

0.008046

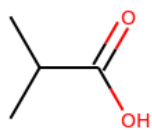

0.077084

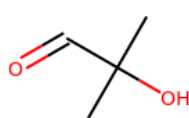

0.081874

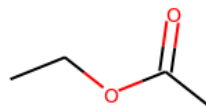

0.083511

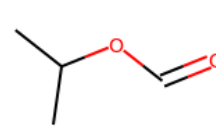

0.091763

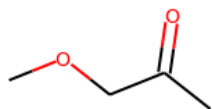

0.103167

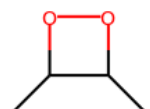

0.115577

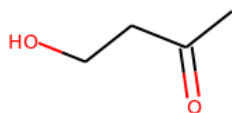

0.127283

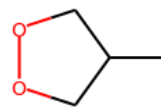

0.144516

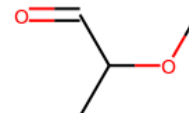

0.148293

|                                   |        |                                   |        |
|-----------------------------------|--------|-----------------------------------|--------|
| Top predicted substructures       | prob   |                                   |        |
| [CX4H3]                           | 1.0    | [CX4H3][CX3]                      | 0.9975 |
| [CX3](=[OX1])C                    | 0.9998 | [CX4H3][CX3H0]                    | 0.9972 |
| [CX4H3][#6]                       | 0.9995 | [CX4H3][CX4]O                     | 0.9872 |
| [#6H3][#6][#6]                    | 0.9993 | [CX4H]O                           | 0.9696 |
| [OX1H0]=[CX3H0][CX4H3]            | 0.9985 | [#6H3][#6H0]                      | 0.963  |
| best positives                    | prob   | best negatives                    | prob   |
| [CX4H3]                           | 1.0    | C=CC=CC#C                         | 0.0    |
| [CX3](=[OX1])C                    | 0.9998 | C=CCCC#C                          | 0.0    |
| [CX4H3][#6]                       | 0.9995 | [#6H2]=[#6][#6X2]                 | 0.0    |
| [#6H3][#6][#6]                    | 0.9993 | CC=CC#CC                          | 0.0    |
| [OX1H0]=[CX3H0][CX4H3]            | 0.9985 | [#7][#6]=[#6][#6][#6]=[#7]        | 0.0    |
| [CX4H3][CX3]                      | 0.9975 | CCC#CC=C                          | 0.0    |
| [CX4H3][CX3H0]                    | 0.9972 | [CX3H0](=[CX3H1])([CX4H2])[CX2H0] | 0.0    |
| [CX4H3][CX4]O                     | 0.9872 | [CX3H0](=[CX3H2])([CX4H2])[CX4H0] | 0.0    |
| [CX4H]O                           | 0.9696 | [CX2H0](#[CX2H0])[CX3H1]          | 0.0    |
| [#6H3][#6H0]                      | 0.963  | [#6]1[#6]=[#6][#6][#6]=[#6]1      | 0.0    |
| worst negatives                   | prob   | worst positives                   | prob   |
| [CX3H0](=[OX1H0])([CX4H3])[CX4H0] | 0.2983 | [CX3H0](=[OX1H0])([CX4H3])[CX4H1] | 0.3801 |
| [#6X3][#6][#6][#6H3]              | 0.2897 | [#6H3][#6][#6][#6H3]              | 0.591  |
| [#8][#6][#6][#6X3]                | 0.2299 | [#8H][#6X4H1][#6X3H0]             | 0.6508 |
| [CX4H2][CX3]=O                    | 0.1798 | [#8]=[#6H0][#6H1]                 | 0.698  |
| [CX4H1](=[OX2H1])([CX4H3])[CX4H1] | 0.1662 | O=[CX3][CX4H]                     | 0.7634 |
| [CX4H2]CC=O                       | 0.1548 | [OH][CX4H]                        | 0.7795 |
| [OX1H0]=[CX3H0][CX3H0][CX4H3]     | 0.1474 | [#6X4H3][#6][#8H]                 | 0.7997 |
| [CHX4](=[CH3X4])[CH3X4]           | 0.1398 | [#6H3][#6][#6X3]                  | 0.8048 |
| [#6H3][#6X3H0][#6H2]              | 0.084  | [CH3]CC[OH]                       | 0.808  |
| [CX4H3][CX3H0][CX3]=O             | 0.0673 | [CX4H1](=[OX2H1])([CX4H3])[CX3H0] | 0.8115 |

---

Example 79 true smiles: O=C(O)C(O)CO formula: C3H6O4  
 Index of correct structure: 0 of 71  
 True structure loss: 0.021543  
 True structure:

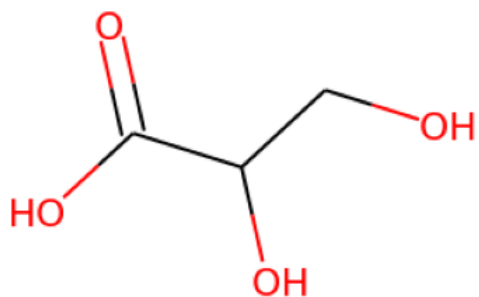

Experimental <sup>13</sup>C NMR (solvent: D<sub>2</sub>O)

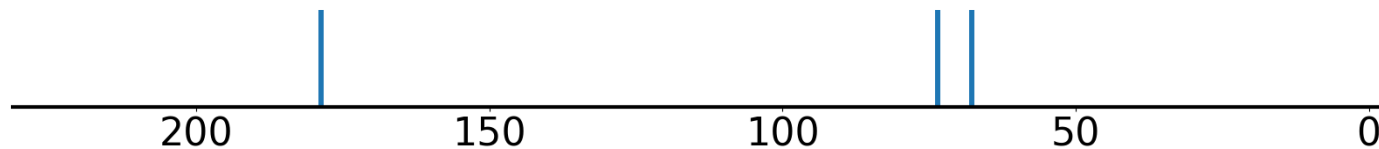

Experimental <sup>1</sup>H NMR (solvent: D<sub>2</sub>O)

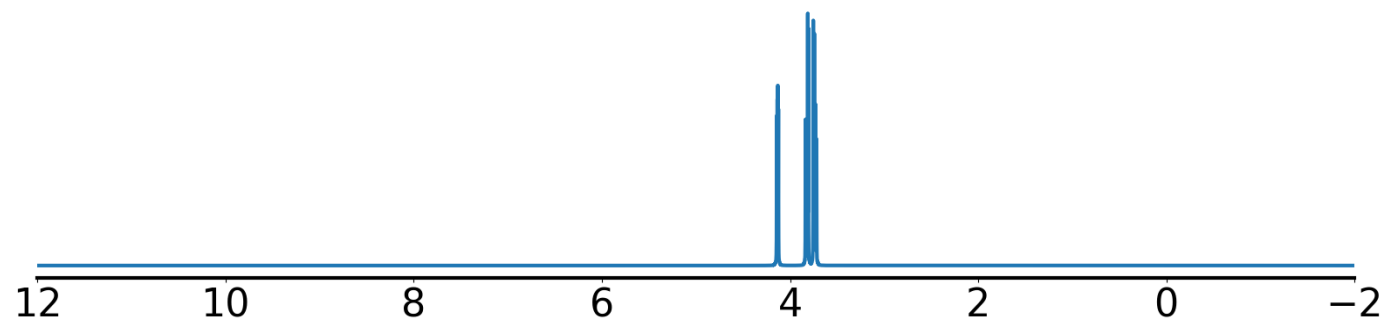

Top predicted structures (loss):

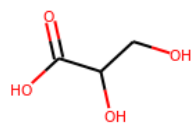

0.021543

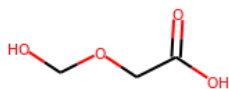

0.044352

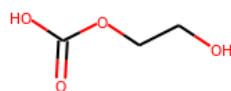

0.047151

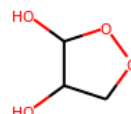

0.047896

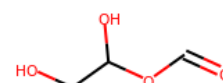

0.049885

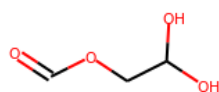

0.052381

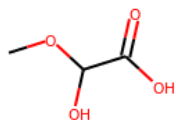

0.056455

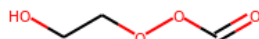

0.057624

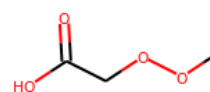

0.058404

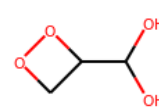

0.060583



|                              |        |                                        |        |
|------------------------------|--------|----------------------------------------|--------|
| Top predicted substructures  | prob   |                                        |        |
| [CX4H2]([#6])[O]             | 0.9958 | [CX3](=[OX1])O                         | 0.9601 |
| [OX2H1]                      | 0.9803 | [#8][#6][#6H2]                         | 0.9595 |
| [#8][#6][#6H2][#8]           | 0.9765 | [CX4H](O)CO                            | 0.9528 |
| [#8][#6][#6][#8]             | 0.9709 | [#8]=[#6][#8]                          | 0.9428 |
| [CX3](=[OX1])C               | 0.9707 | [CX4H2](O)[CHX4]                       | 0.8824 |
| best positives               | prob   | best negatives                         | prob   |
| [CX4H2]([#6])[O]             | 0.9958 | [#6X2][#6H1][#6X2]                     | 0.0    |
| [OX2H1]                      | 0.9803 | CC=CCC#C                               | 0.0    |
| [#8][#6][#6H2][#8]           | 0.9765 | CC#CCC=C                               | 0.0    |
| [#8][#6][#6][#8]             | 0.9709 | [#7][#6][#6][#7]                       | 0.0    |
| [CX3](=[OX1])C               | 0.9707 | [CX2H1]#[CX2H0][CX3H1]=[CX3H0]         | 0.0    |
| [CX3](=[OX1])O               | 0.9601 | CCC#CC#C                               | 0.0    |
| [#8][#6][#6H2]               | 0.9595 | [CX3H0](=[CX3H1])([CX4H1])[CX2H0]      | 0.0    |
| [CX4H](O)CO                  | 0.9528 | [CX2H0](#[CX2H0])[CX4H0]               | 0.0    |
| [#8]=[#6][#8]                | 0.9428 | [CX3H1](=[CX3H1])[CX2H0]               | 0.0    |
| [CX4H2](O)[CHX4]             | 0.8824 | [#6H2][#6][#6X2]                       | 0.0    |
| worst negatives              | prob   | worst positives                        | prob   |
| [CX4H2][OX2H0][CX4H2]        | 0.4959 | [#8][#6][#6][#6X3]                     | 0.2983 |
| [CX4H2][CX4H2]               | 0.4874 | [#8][#6H0][#6H1]                       | 0.3087 |
| O[CX4H2][CX4H2]O             | 0.4826 | [OX1H0]=[CX3H0][CX4H1]([OX2H1])[CX4H2] | 0.3588 |
| [OX2H0][CX4H2][CX4H2][OX2H0] | 0.4747 | [#8H][#6X4H1][#6X3H0]                  | 0.4136 |
| [CX4H2][CX3]=O               | 0.4013 | [#8][#6H2][#6H][#6X3]                  | 0.445  |
| [CX4H2]([OX2H0])[CX3H0]      | 0.3274 | [OH][CX4H]                             | 0.4498 |
| [CX4H2]([OX2H0])[CX4H2]      | 0.2791 | [CX3H0](=[OX1H0])([OX2H1])[CX4H1]      | 0.4515 |
| [#6X3][#6H2][#8]             | 0.2575 | [#8][#6H2][#6H1][#6H0]                 | 0.4696 |
| [CX4H2]([OX2H0])[CX4H1]      | 0.2448 | [#8]=[#6H0][#6H1]                      | 0.5513 |
| [#8][#6H1][#6H1]             | 0.2291 | [#6X4H2][#6H1][#8H]                    | 0.552  |

---

Example 80 true smiles: O=C(O)CC(=O)O formula: C3H4O4  
Index of correct structure: 0 of 69  
True structure loss: 0.035753  
True structure:

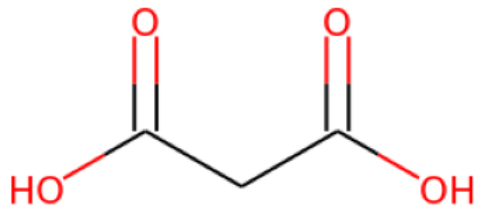

Experimental <sup>13</sup>C NMR (solvent: D2O)

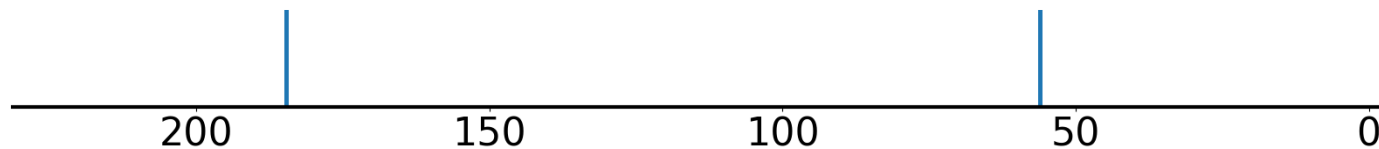

Experimental <sup>1</sup>H NMR (solvent: D2O)

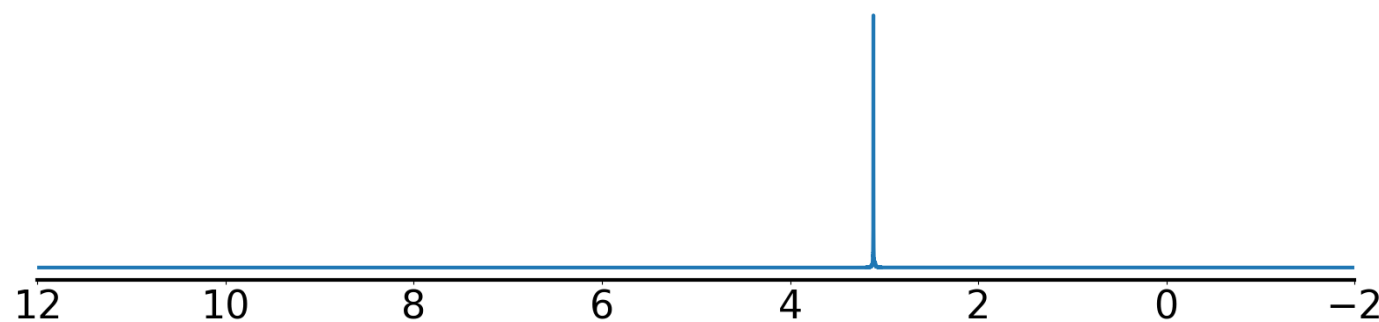

Top predicted structures (loss):

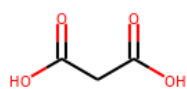

0.035753

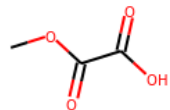

0.038212

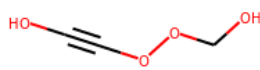

0.039043

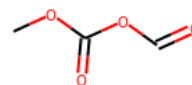

0.044505

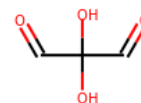

0.054523

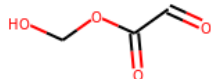

0.059851

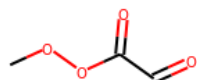

0.065053

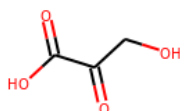

0.068764

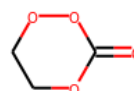

0.07055

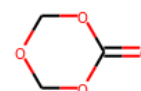

0.072

|                                   |        |                                    |        |
|-----------------------------------|--------|------------------------------------|--------|
| Top predicted substructures       | prob   |                                    |        |
| [CX3](=[OX1])C                    | 0.9967 | [#8][#6][#6][#6X3]                 | 0.52   |
| [#8]=[#6][#8]                     | 0.9615 | [#8][#6][#6H2]                     | 0.4323 |
| [OX2H1]                           | 0.9267 | [#8][#6][#6]=[#8]                  | 0.4315 |
| [CX3](=[OX1])O                    | 0.847  | [CX4H2][CX3]=O                     | 0.4011 |
| [CX3](=O)[OX2H1]                  | 0.6954 | [CX3H0](=[OX1H0])([OX2H1])[CX4H1]  | 0.3988 |
| best positives                    | prob   | best negatives                     | prob   |
| [CX3](=[OX1])C                    | 0.9967 | [CX2H1]#[CX2H0][CX3H1]=[CX3H0]     | 0.0    |
| [#8]=[#6][#8]                     | 0.9615 | [CX3H0](=[CX3H2])([CX4H3])[CX4H2]  | 0.0    |
| [OX2H1]                           | 0.9267 | [#6H3][#6X3][#6X3]=[#6X3H2]        | 0.0    |
| [CX3](=[OX1])O                    | 0.847  | C=CC=CC#C                          | 0.0    |
| [CX3](=O)[OX2H1]                  | 0.6954 | CCC=CC#C                           | 0.0    |
| [#8][#6][#6][#6X3]                | 0.52   | CC=CCC#C                           | 0.0    |
| [#8][#6][#6H2]                    | 0.4323 | [#6X3H1]=[#6X3H1][#6X3H0]=[#6X3H1] | 0.0    |
| [CX4H2][CX3]=O                    | 0.4011 | [CX3H0](=[CX3H2])([CX4H3])[CX4H1]  | 0.0    |
| [CX3H0](=[OX1H0])([OX2H1])[CX4H2] | 0.151  | [CX3H0](=[CX3H2])([CX4H2])[CX4H2]  | 0.0    |
| O=[#6][#6][#6X3]                  | 0.1293 | [#6X3H2]=[#6][#6H2][#8H]           | 0.0    |
| worst negatives                   | prob   | worst positives                    | prob   |
| [#8][#6][#6]=[#8]                 | 0.4315 | [#6X3][#6H2][#6X3]                 | 0.0077 |
| [CX3H0](=[OX1H0])([OX2H1])[CX4H1] | 0.3988 | [OX1H0]=[CX3H0][CX4H2][CX3H0]      | 0.0242 |
| [CX4H2]CC=O                       | 0.3483 | [CX4H2]( [CX3H0] ) [CX3H0]         | 0.0312 |
| O=[CX3][CX4H]                     | 0.3318 | [CX4H2]( [#6] ) [#6]               | 0.0416 |
| [#8][#6][#6][#8]                  | 0.3293 | [#8X1]=[#6X3][#6H2][#6H0]          | 0.1103 |
| [CX4H3]                           | 0.3247 | [OX1H0]=[CX3H0]( [#8] ) [CX4H2]    | 0.1156 |
| [#8]=[#6H0][#6H1]                 | 0.2727 | O=[#6][#6][#6X3]                   | 0.1293 |
| C1CC1O                            | 0.2616 | [CX3H0](=[OX1H0])([OX2H1])[CX4H2]  | 0.151  |
| [CX4H]O                           | 0.2464 | [CX4H2][CX3]=O                     | 0.4011 |
| [#6H1][#6H1]                      | 0.2397 | [#8][#6][#6H2]                     | 0.4323 |

---

Example 81 true smiles: O=C1CCCO1 formula: C4H6O2  
 Index of correct structure: 0 of 68  
 True structure loss: 0.012881  
 True structure:

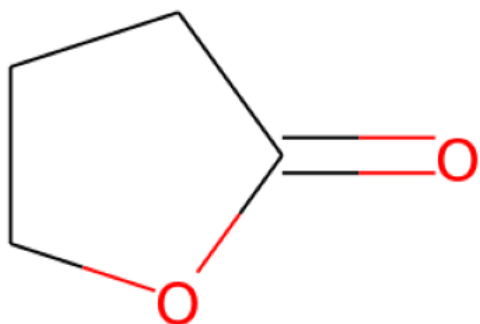

Experimental <sup>13</sup>C NMR (solvent: CDCl<sub>3</sub>)

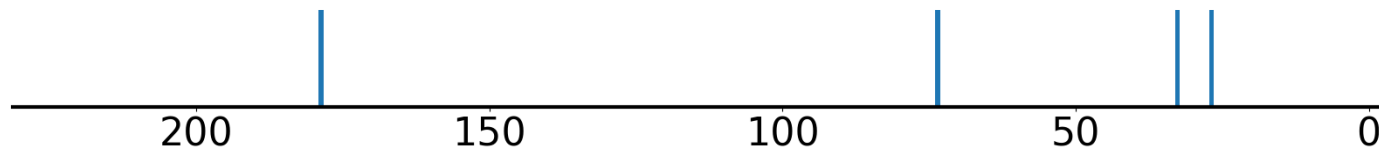

Experimental <sup>1</sup>H NMR (solvent: CDCl<sub>3</sub>)

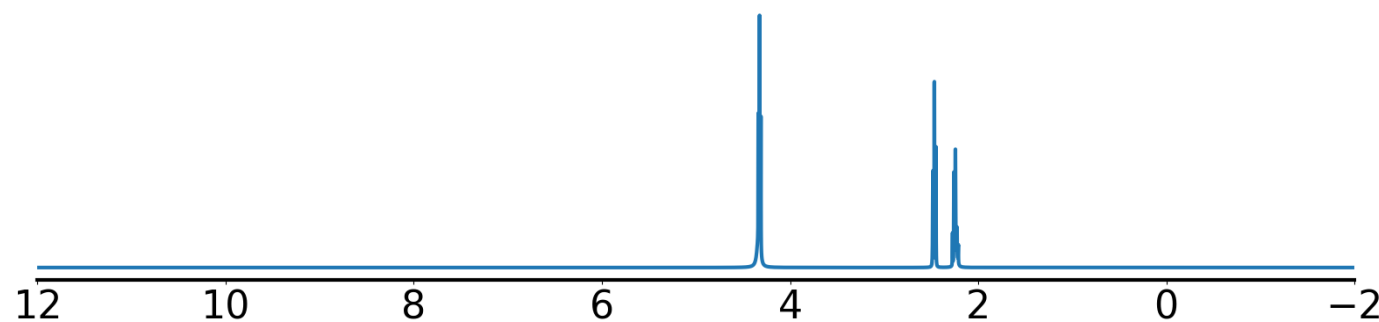

Top predicted structures (loss):

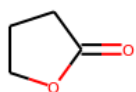

0.012881

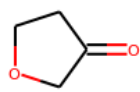

0.078109

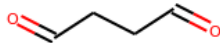

0.078619

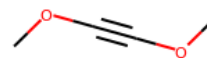

0.105713

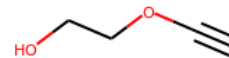

0.11641

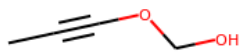

0.131362

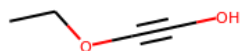

0.131877

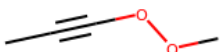

0.138979

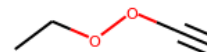

0.146089

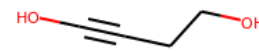

0.150866

| Top predicted substructures       | prob   |                                           |        |
|-----------------------------------|--------|-------------------------------------------|--------|
| [CX4H2]([#6])[#6]                 | 1.0    | O=[CX3H0][CX4H2][CX4H2]                   | 0.9854 |
| [CX3](=[OX1])C                    | 0.9937 | [CX4H2]([CX4H2])[CX3H0]                   | 0.9817 |
| [CX4H2][CX4H2]                    | 0.9917 | [CX3](=[OX1])O                            | 0.9816 |
| [#8]=[#6][#8]                     | 0.9865 | OCC[CH2]                                  | 0.9547 |
| [#8][#6][#6H2]                    | 0.9859 | [OX1H0]=[CX3H0]([#8])[CX4H2]              | 0.9465 |
| best positives                    | prob   | best negatives                            | prob   |
| [CX4H2]([#6])[#6]                 | 1.0    | C=CC=CC#C                                 | 0.0    |
| [CX3](=[OX1])C                    | 0.9937 | [#6H3][#6H1][#6H1]=[#7]                   | 0.0    |
| [CX4H2][CX4H2]                    | 0.9917 | [CX2H0](#[CX2H1])[CX3H0]                  | 0.0    |
| [#8]=[#6][#8]                     | 0.9865 | [CX4H1]([NX3H1])([CX4H1])[CX4H0]          | 0.0    |
| [#8][#6][#6H2]                    | 0.9859 | [#7][#6]=[#6][#6][#6]=[#7]                | 0.0    |
| O=[CX3H0][CX4H2][CX4H2]           | 0.9854 | [CX2H0](#[CX2H0])[CX2H0]                  | 0.0    |
| [CX4H2]([CX4H2])[CX3H0]           | 0.9817 | [CX2H0](#[CX2H0])[CX4H0]                  | 0.0    |
| [CX3](=[OX1])O                    | 0.9816 | [CX3H1](=[CX3H2])[CX4H0]                  | 0.0    |
| OCC[CH2]                          | 0.9547 | [CX3H1]([NX2H0])[CX3H1]                   | 0.0    |
| [OX1H0]=[CX3H0]([#8])[CX4H2]      | 0.9465 | [CX4H0]([CX4H3])([CX4H2])([CX4H1])[CX3H1] | 0.0    |
| worst negatives                   | prob   | worst positives                           | prob   |
| [#6H1][#6H2]                      | 0.4527 | [CH2X4](O)[CX4H2][CX4H2]                  | 0.3247 |
| [#6H1]                            | 0.3246 | [#8][#6][#6][#6]=[#8]                     | 0.3358 |
| [#8][#6H0][#6H1]                  | 0.2895 | C1OCCCC1                                  | 0.4169 |
| [#8]1[#6][#6][#6][#6]1            | 0.2852 | [OX2H0][CX4H2][CX4H2][CX4H2]              | 0.4595 |
| [CX3H0](=[OX1H0])([OX2H1])[CX4H2] | 0.2471 | [CX4H2]([CX4H2])[CX4H2]                   | 0.5617 |
| [OX2H1]                           | 0.2037 | [CH2X4](O)[CX4H2]                         | 0.5937 |
| [CX4H2]([CX4H2])[CX4H1]           | 0.193  | [CX4H2]([#6])[O]                          | 0.6874 |
| [CX4H]O                           | 0.1919 | [CX4H2]([OX2H0])[CX4H2]                   | 0.6885 |
| [#6X4H2][#6H1][#8H]               | 0.1893 | [CX4H2][CX3]=O                            | 0.8696 |
| [CX4H2]([CX4H2])[CX3H1]           | 0.1827 | [OX2H0][CX3H0][CX4H2]                     | 0.8931 |

---

Example 82 true smiles: CC=CC(=O)O formula: C5H8O  
Index of correct structure: 0 of 66  
True structure loss: 0.009459  
True structure:

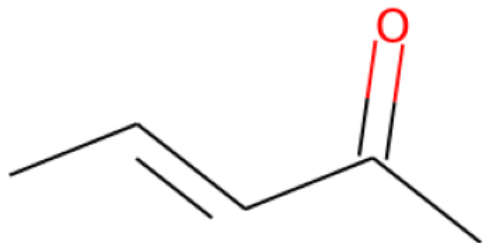

Experimental <sup>13</sup>C NMR (solvent: CDCl<sub>3</sub>)

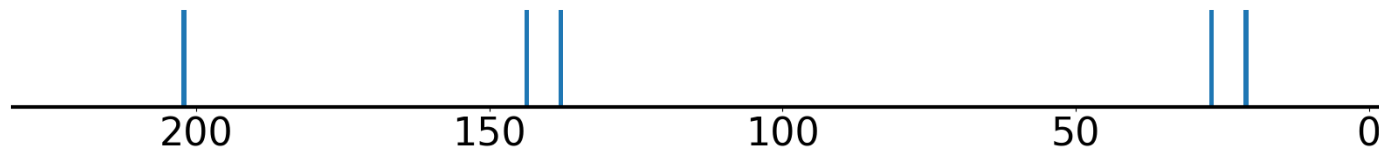

Experimental <sup>1</sup>H NMR (solvent: D<sub>2</sub>O)

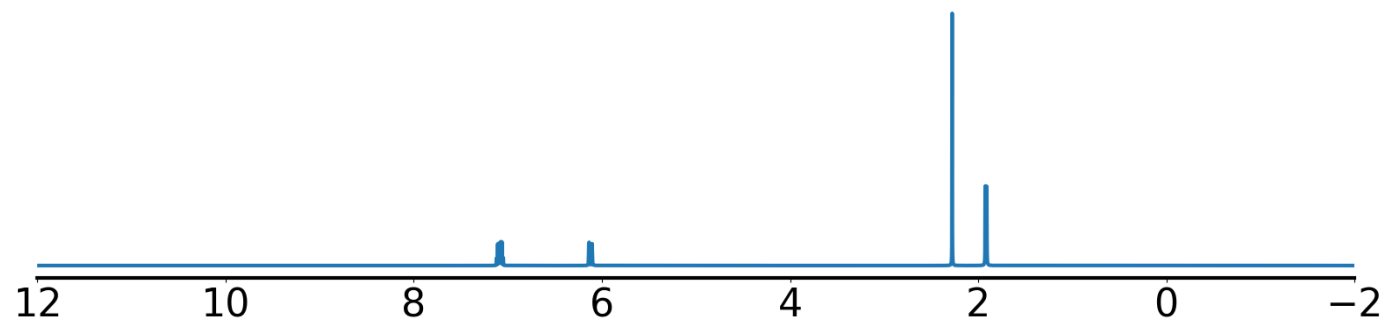

Top predicted structures (loss):

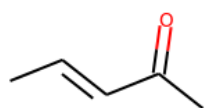

0.009459

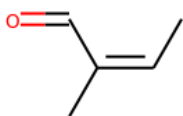

0.052656

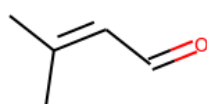

0.059911

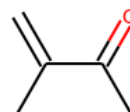

0.086267

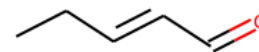

0.116485

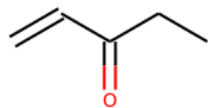

0.143647

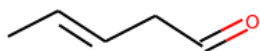

0.150581

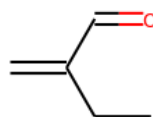

0.185346

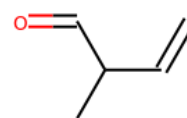

0.18705

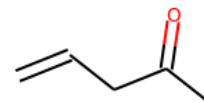

0.189319

|                                  |        |                                              |        |
|----------------------------------|--------|----------------------------------------------|--------|
| Top predicted substructures      | prob   |                                              |        |
| [CX4H3]                          | 1.0    | [#6X3][#6X3]                                 | 0.9976 |
| [CX4H3][#6]                      | 1.0    | [#6H3][#6H0]                                 | 0.9971 |
| [CX4H3][CX3]                     | 1.0    | [CX4H3][CX3H0]                               | 0.9952 |
| O[#6][#6]=[#6X3]                 | 0.9998 | [#6H3][#6][#6]                               | 0.9934 |
| [CX3](=[OX1])C                   | 0.9977 | [#6H3][#6]=[#6X3]                            | 0.992  |
| best positives                   | prob   | best negatives                               | prob   |
| [CX4H3]                          | 1.0    | {OX2H0}1{CX4H2}{CX4H2}{CX4H1}{CX4H1}1        | 0.0    |
| [CX4H3][#6]                      | 1.0    | [CX4H1]({OX2H0})({CX4H1}){CX2H0}             | 0.0    |
| [CX4H3][CX3]                     | 1.0    | [#6X2][#6H1][#6X2]                           | 0.0    |
| O[#6][#6]=[#6X3]                 | 0.9998 | [CX2H0]({CX2H0}){CX2H0}                      | 0.0    |
| [CX3](=[OX1])C                   | 0.9977 | [OX2H1][CX4H1][CX4H1][CX2H0]                 | 0.0    |
| [#6X3][#6X3]                     | 0.9976 | [CX2H0]({CX2H1}){CX4H0}                      | 0.0    |
| [#6H3][#6H0]                     | 0.9971 | {OX2H0}{CX4H1}{CX4H1}({CX4H2}{CX4H1}){CX4H1} | 0.0    |
| [CX4H3][CX3H0]                   | 0.9952 | CCC#CC#C                                     | 0.0    |
| [#6H3][#6][#6]                   | 0.9934 | CCC=CC#C                                     | 0.0    |
| [#6H3][#6]=[#6X3]                | 0.992  | [CX4H1]({OX2H0})({CX4H2}){CX2H0}             | 0.0    |
| worst negatives                  | prob   | worst positives                              | prob   |
| [CX3H1]({CX3H0}){CX4H3}          | 0.5167 | [CX3H1]({CX3H1}){CX4H3}                      | 0.272  |
| [CX4H3][CX3H0][CX3]=O            | 0.4214 | [#8]=[#6H0][#6H1]                            | 0.5397 |
| [OX1H0]=[CX3H0][CX3H0]{CX4H3}    | 0.3295 | [CHX3]=[CHX3]                                | 0.554  |
| [#6X3H1]=[#6X3H0]                | 0.3267 | [CX4H3][CX3H1]                               | 0.7385 |
| [CX3H0]({CX3H1})({CX4H3}){CX3H0} | 0.2832 | [OX1H0]=[CX3H0][CX3H1]=[CX3H1]               | 0.7645 |
| [CX3H0]({OX1H0})({CX4H3}){CX3H0} | 0.1733 | [#6X3H1][#6X3H0]                             | 0.7847 |
| CCC=CCC                          | 0.1469 | [CX3H1]({CX3H1}){CX3H0}                      | 0.7862 |
| [#6H1][#6H2]                     | 0.14   | [#6X3]=[#6][#6][#6H3]                        | 0.801  |
| [CX4H2]CC=O                      | 0.1286 | O=C{CX3H}                                    | 0.8111 |
| [#6H3][#6]=[#6][#6H3]            | 0.1172 | [#6X3][#6]=[#6][#6H3]                        | 0.9067 |

---

Example 83 true smiles: C#CCCCO formula: C5H8O  
Index of correct structure: 0 of 66  
True structure loss: 0.016951  
True structure:

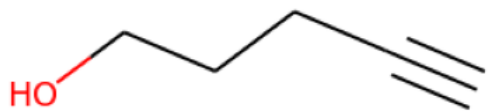

Experimental <sup>13</sup>C NMR (solvent: CDCl<sub>3</sub>)

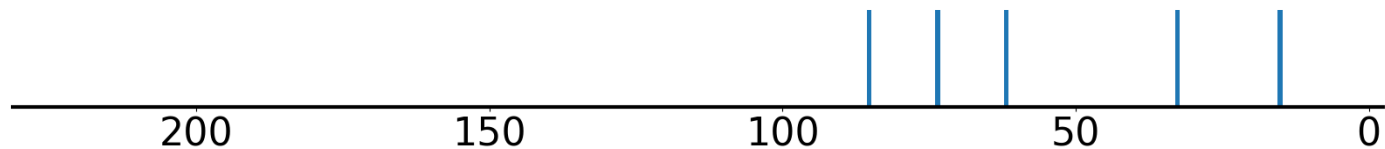

Experimental <sup>1</sup>H NMR (solvent: CDCl<sub>3</sub>)

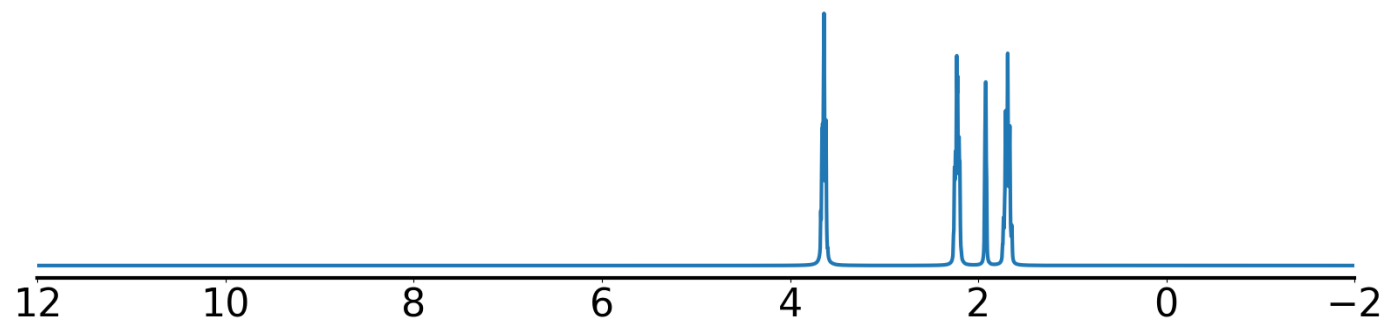

Top predicted structures (loss):

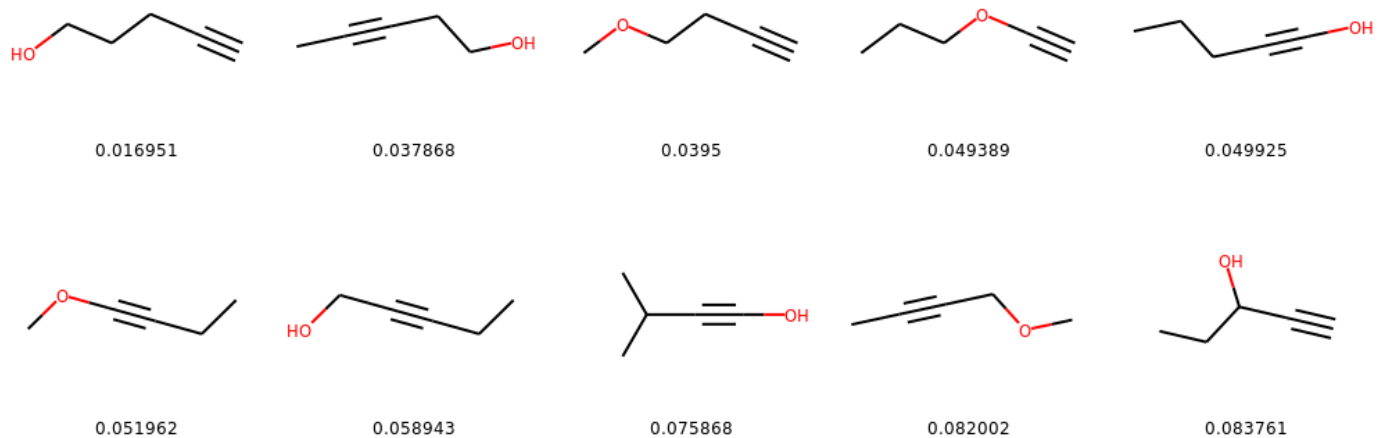



|                              |        |                                     |        |
|------------------------------|--------|-------------------------------------|--------|
| Top predicted substructures  | prob   |                                     |        |
| [CX4H2]([#6])[#6]            | 1.0    | [CX4H2][CX4H2]                      | 0.8862 |
| [\$([CX2]#C)]                | 0.9873 | [#6H1]                              | 0.7888 |
| [#8] [#6] [#6H2]             | 0.9817 | [OX2H1]                             | 0.7786 |
| [#6H2] [#6X2]                | 0.9468 | [CX4H2]([CX4H2])[CX4H2]             | 0.7719 |
| OCC[CH2]                     | 0.9084 | [CX4H2]([#6])[O]                    | 0.7718 |
| best positives               | prob   | best negatives                      | prob   |
| [CX4H2]([#6])[#6]            | 1.0    | [CX3H1](=[CX3H2])[CX3H0]            | 0.0    |
| [\$([CX2]#C)]                | 0.9873 | [#6H3] [#6H1] [#6H1] [#7]           | 0.0    |
| [#8] [#6] [#6H2]             | 0.9817 | [#6X3H1] [#6X3H1] [#6X3H0] [#6X3H1] | 0.0    |
| [#6H2] [#6X2]                | 0.9468 | [#7] [#6] [#6] [#6] [#6] [#7]       | 0.0    |
| OCC[CH2]                     | 0.9084 | [#6H3] [#6X3] [#6X3] [#6X3H2]       | 0.0    |
| [CX4H2][CX4H2]               | 0.8862 | [CX4H3][nX3H0]                      | 0.0    |
| [#6H1]                       | 0.7888 | [#6X3H2] [#6] [#6H2] [#8H]          | 0.0    |
| [OX2H1]                      | 0.7786 | [CX3H2] [#CX3H0][CX4H2][CX3H1]      | 0.0    |
| [CX4H2]([CX4H2])[CX4H2]      | 0.7719 | [CX4H1]([CX4H3])([CX3H1])[CX3H0]    | 0.0    |
| [CX4H2]([#6])[O]             | 0.7718 | [CX3H0][CX3H1] [#CX3H1][CX3H0]      | 0.0    |
| worst negatives              | prob   | worst positives                     | prob   |
| [CX4H2]([CX4H2])[CX4H1]      | 0.552  | [CX2H1] [#CX2H0]                    | 0.1858 |
| [#6H1] [#6H2]                | 0.4324 | [CX2H0] ([#CX2H1])[CX4H2]           | 0.2053 |
| [CX2H0] ([#CX2H0])[CX4H2]    | 0.4073 | [#6H2] [#6] [#6X2]                  | 0.4253 |
| [CX4H2]([OX2H0])[CX4H2]      | 0.3957 | [CH2X4] (O)[CX4H2][CX4H2]           | 0.437  |
| O[CX4H][CX4H2]               | 0.3157 | [#6H2] [#6] [#6X2]                  | 0.5926 |
| [OX2H0][CX4H2][CX4H2][CX4H2] | 0.2985 | [CH2X4] (O)[CX4H2]                  | 0.6768 |
| [OH][CX4H]                   | 0.2508 | [CX4H2]([OX2H1])[CX4H2]             | 0.7005 |
| C1CCC1                       | 0.24   | [CX4H2]([CX4H2])[CX2H0]             | 0.7332 |
| [CX4H]O                      | 0.2393 | [CX4H2]([#6])[O]                    | 0.7718 |
| O[CX4H]([CX4H2])[CX4H1]      | 0.1734 | [CX4H2]([CX4H2])[CX4H2]             | 0.7719 |

---

Example 84 true smiles: CC1CCCO1 formula: C5H10O  
Index of correct structure: 0 of 65  
True structure loss: 0.019401  
True structure:

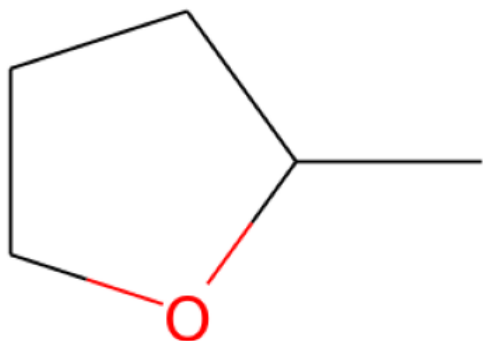

Experimental <sup>13</sup>C NMR (solvent: CDCl<sub>3</sub>)

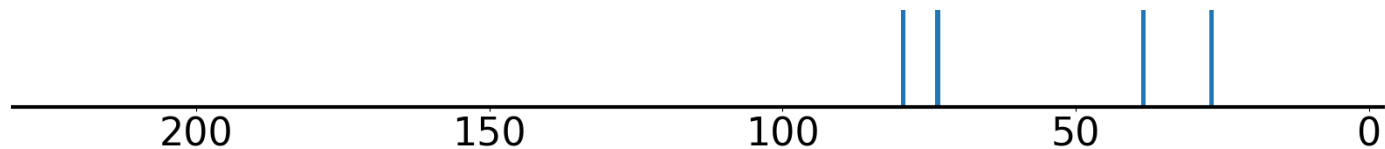

Experimental <sup>1</sup>H NMR (solvent: CDCl<sub>3</sub>)

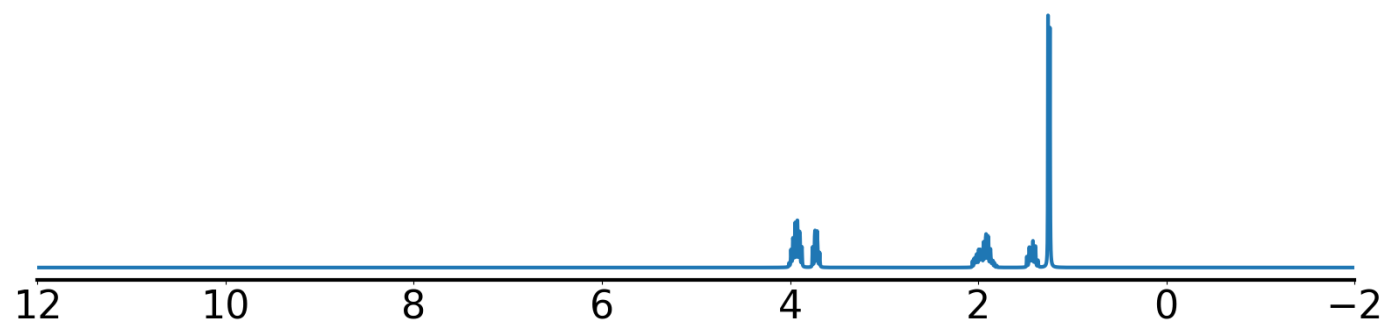

Top predicted structures (loss):

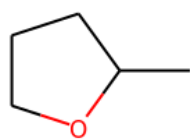

0.019401

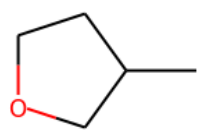

0.040693

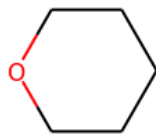

0.056381

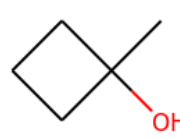

0.074822

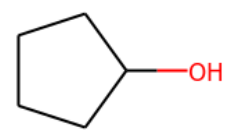

0.074921

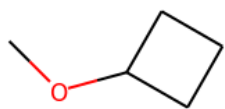

0.07954

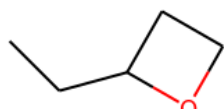

0.090534

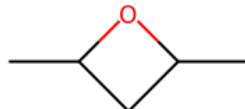

0.092396

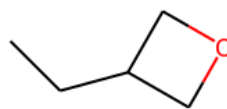

0.095725

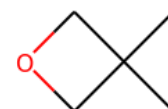

0.099106

|                              |        |                                   |        |
|------------------------------|--------|-----------------------------------|--------|
| Top predicted substructures  | prob   |                                   |        |
| [CX4H2]([#6])[#6]            | 0.9999 | [#8][#6][#6H2]                    | 0.9866 |
| [#6H3][#6][#6]               | 0.9983 | [#6H1]                            | 0.979  |
| [CX4H3]                      | 0.9975 | [CX4H3][#6]                       | 0.9772 |
| [CX4H3][CX4]O                | 0.9971 | [CX4H2]([#6])[O]                  | 0.9586 |
| OCC[CH2]                     | 0.9906 | [CX4H2][CX4H2]                    | 0.906  |
| best positives               | prob   | best negatives                    | prob   |
| [CX4H2]([#6])[#6]            | 0.9999 | [#7][#6]=[#6][#6]#[#7]            | 0.0    |
| [#6H3][#6][#6]               | 0.9983 | C=CC=CC#C                         | 0.0    |
| [CX4H3]                      | 0.9975 | [#7][#6]=[#6][#6][#6]=[#7]        | 0.0    |
| [CX4H3][CX4]O                | 0.9971 | [CX3H0](=[CX3H1])([OX2H0])[CX2H0] | 0.0    |
| OCC[CH2]                     | 0.9906 | [CX2H0](#[CX2H1])[cX3H0]          | 0.0    |
| [#8][#6][#6H2]               | 0.9866 | [CX3H0](=[CX3H1])([CX4H1])[CX2H0] | 0.0    |
| [#6H1]                       | 0.979  | [CX4H2][#6X3H0][#6X3H1][#8X2H0]   | 0.0    |
| [CX4H3][#6]                  | 0.9772 | [CX3H1](=[CX3H2])[cX3H0]          | 0.0    |
| [CX4H2]([#6])[O]             | 0.9586 | [CX3H0][CX3H1]=[CX3H1][CX3H0]     | 0.0    |
| [CX4H2][CX4H2]               | 0.906  | [CX4H2]([CX4H2])[cX3H0]           | 0.0    |
| worst negatives              | prob   | worst positives                   | prob   |
| CCCCC                        | 0.6438 | [#6H3][#6H1r5]                    | 0.1163 |
| [#8]1[#6][#6][#6][#6][#6]1   | 0.618  | [#6H2][#8][#6H1]                  | 0.3522 |
| [#6H1]([#6H2])[#6H2]         | 0.4381 | [OX2H0][CX4H1][CX4H2][CX4H2]      | 0.4197 |
| [CX4H2](O)[CHX4]             | 0.4361 | [CHX4]([CH3X4])[CH2X4]            | 0.4844 |
| [CX4H2]([OX2H0])[CX4H1]      | 0.4187 | [CX4H2]([OX2H0])[CX4H2]           | 0.5425 |
| [CX4H2]([CX4H2])[CX4H0]      | 0.2965 | [CX4H1]([OX2H0])([CX4H3])[CX4H2]  | 0.5635 |
| [OX2H0][CX4H2][CX4H1][CX4H2] | 0.2461 | [CH2X4](O)[CX4H2][CX4H2]          | 0.5916 |
| [#6H3][#6H0]                 | 0.2246 | [CX4H2]([CX4H2])[CX4H2]           | 0.629  |
| [CX4H2][OX2H0][CX4H2]        | 0.2071 | [OX2H0][CX4H2][CX4H2][CX4H2]      | 0.6583 |
| [OX2H0][CX4H2][#6H0]         | 0.183  | O[CX4H][CX4H2]                    | 0.6667 |

---

Example 85 true smiles: C=C(C)CCO formula: C5H10O  
Index of correct structure: 0 of 65  
True structure loss: 0.018763  
True structure:

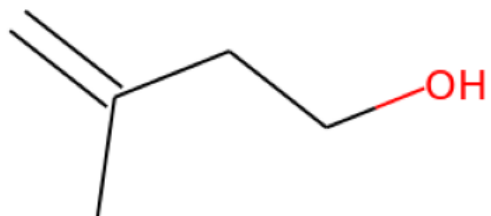

Experimental <sup>13</sup>C NMR (solvent: CDCl<sub>3</sub>)

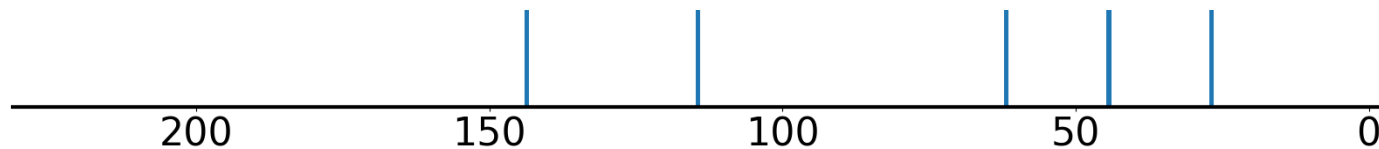

Experimental <sup>1</sup>H NMR (solvent: CDCl<sub>3</sub>)

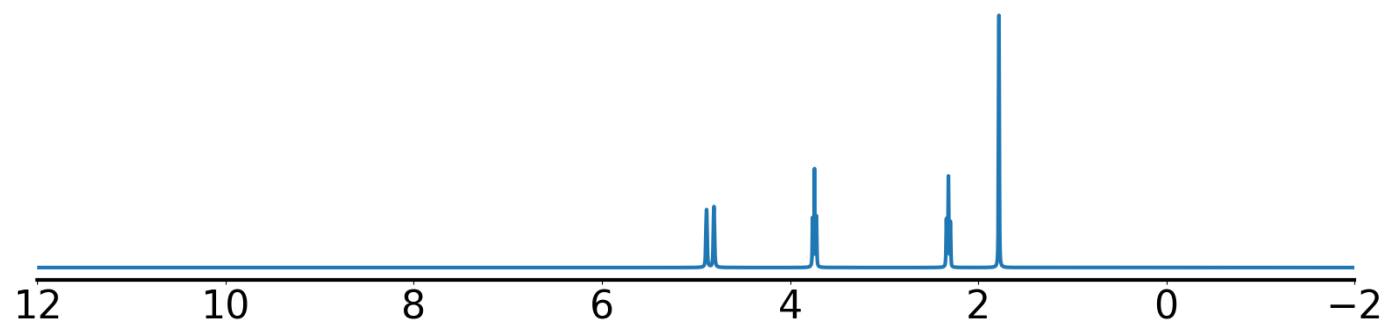

Top predicted structures (loss):

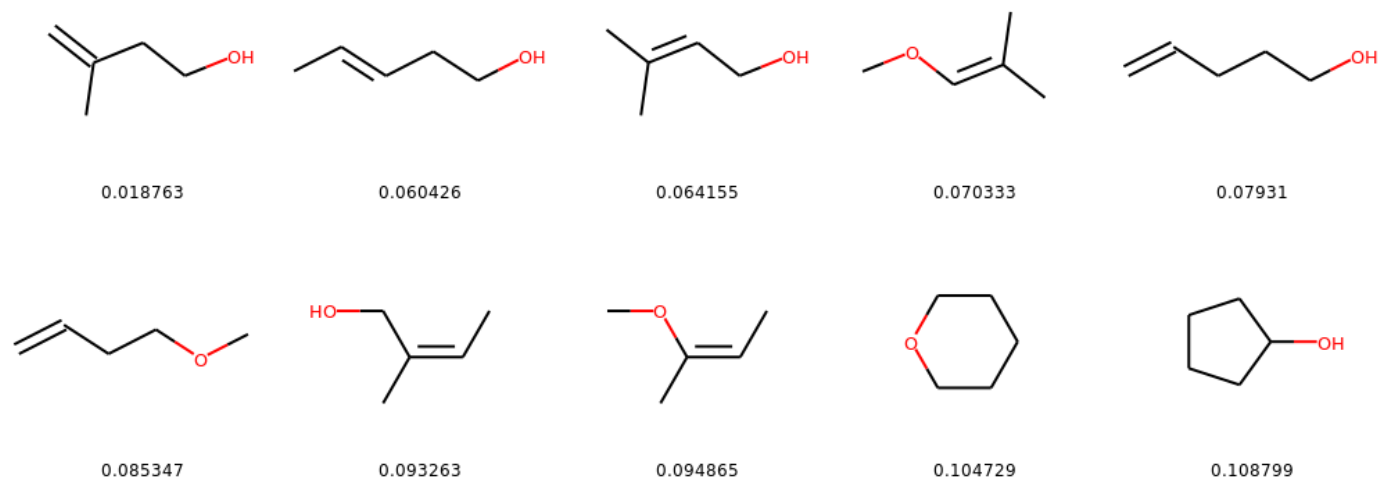

|                                   |        |                                   |        |
|-----------------------------------|--------|-----------------------------------|--------|
| Top predicted substructures       | prob   |                                   |        |
| [CX4H3][CX3]                      | 0.9994 | [#6H3][#6][#6]                    | 0.9862 |
| [CX4H3][CX3H0]                    | 0.9992 | [#8][#6][#6H2]                    | 0.9773 |
| [CX4H3]                           | 0.9979 | [CX4H3][#6]                       | 0.9488 |
| [CX4H2]([#6])[#6]                 | 0.9965 | [CX4H2]([#6])[O]                  | 0.9266 |
| [#6H3][#6H0]                      | 0.9882 | [#6H3][#6]=[#6X3]                 | 0.8826 |
| best positives                    | prob   | best negatives                    | prob   |
| [CX4H3][CX3]                      | 0.9994 | [CX2H0]([#CX2H1])[CX3H0]          | 0.0    |
| [CX4H3][CX3H0]                    | 0.9992 | CCC#CC#C                          | 0.0    |
| [CX4H3]                           | 0.9979 | [#6X2][#6H1][#6X2]                | 0.0    |
| [CX4H2]([#6])[#6]                 | 0.9965 | [CX2H0]([#CX2H0])[CX2H0]          | 0.0    |
| [#6H3][#6H0]                      | 0.9882 | [OX1H0]=[CX3H0][CX2H0]#[CX2H1]    | 0.0    |
| [#6H3][#6][#6]                    | 0.9862 | [CX2H0]([#CX2H1])[CX4H0]          | 0.0    |
| [#8][#6][#6H2]                    | 0.9773 | [CX2H1]#[CX2H0][CX3H1]=[CX3H0]    | 0.0    |
| [CX4H3][#6]                       | 0.9488 | [CX2H0]([#CX2H1])[CX4H1]          | 0.0    |
| [CX4H2]([#6])[O]                  | 0.9266 | CC#CCC#C                          | 0.0    |
| [#6H3][#6]=[#6X3]                 | 0.8826 | C=CC=CC#C                         | 0.0    |
| worst negatives                   | prob   | worst positives                   | prob   |
| [#6H1]                            | 0.8155 | [CX3H2]=[CX3H0]                   | 0.2335 |
| [CX3H0]([#CX3H1])([CX4H3])[CX4H3] | 0.5796 | [CH2X3](=C)                       | 0.2786 |
| [#6H1][#6H2]                      | 0.5512 | [CX3H2]=[CX3H0]([#6])[#6]         | 0.3573 |
| [CHX3](=C)C                       | 0.4889 | [#6H2][#6X3H0]=[#6H2]             | 0.3883 |
| [#6X3H1]=[#6X3H0]                 | 0.4438 | [CX3H0]([#CX3H2])([CX4H3])[CX4H2] | 0.4059 |
| [CX3H1]([#CX3H0])[CX4H2]          | 0.2614 | [#6H3][#6X3H0][#6H2]              | 0.4249 |
| [CX4H2]([CX4H2])[CX3H1]           | 0.2405 | [#6X3H2]                          | 0.4339 |
| [CX4H3][CX3H0][CX4H3]             | 0.2299 | [CX4H2]([CX4H2])[CX3H0]           | 0.5982 |
| [CX4H2][CX3H]                     | 0.2041 | [CX4H3][CX3H0]=[CX3H2]            | 0.6795 |
| [#7X3H2]                          | 0.1637 | [#8][#6][#6][#6X3]                | 0.7215 |

---

Example 86 true smiles: C=CCCCO formula: C5H10O  
Index of correct structure: 0 of 65  
True structure loss: 0.020514  
True structure:

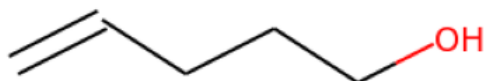

Experimental <sup>13</sup>C NMR (solvent: CDCl<sub>3</sub>)

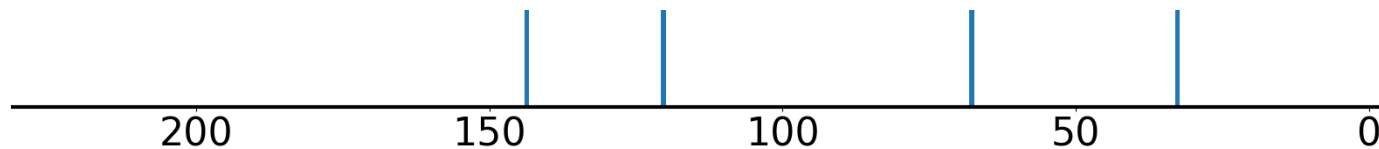

Experimental <sup>1</sup>H NMR (solvent: CDCl<sub>3</sub>)

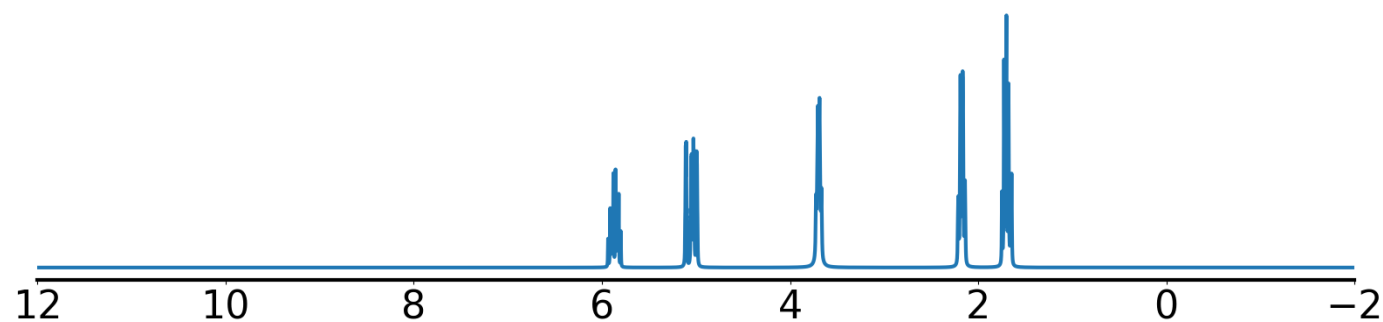

Top predicted structures (loss):

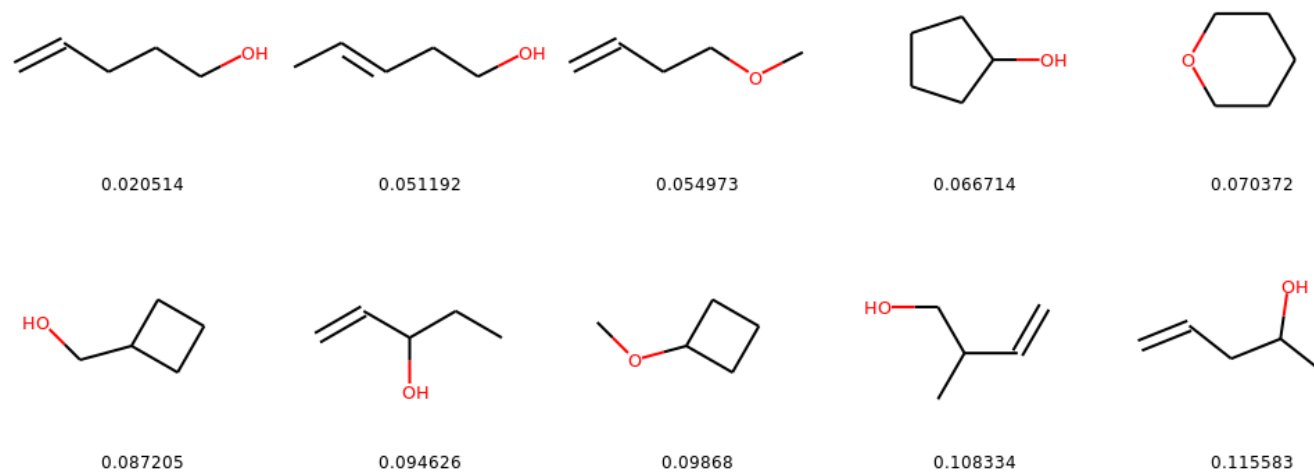

|                             |        |                                   |        |
|-----------------------------|--------|-----------------------------------|--------|
| Top predicted substructures | prob   |                                   |        |
| [CHX3](=C)C                 | 1.0    | [CX4H2][CX4H2]                    | 0.9205 |
| [CX4H2]([#6])[#6]           | 1.0    | [CX4H2]([CX4H2])[CX4H2]           | 0.8843 |
| [#6H1]                      | 0.9999 | [CX4H2]([#6])[O]                  | 0.8636 |
| [#8][#6][#6H2]              | 0.9914 | [#6H1][#6H2]                      | 0.852  |
| [OX2H1]                     | 0.9702 | [CH2X4](O)[CX4H2]                 | 0.8464 |
| best positives              | prob   | best negatives                    | prob   |
| [CHX3](=C)C                 | 1.0    | [CX2H0](#[CX2H1])[CX3H0]          | 0.0    |
| [CX4H2]([#6])[#6]           | 1.0    | [CX2H0](#[CX2H1])[CX4H0]          | 0.0    |
| [#6H1]                      | 0.9999 | [#6X2][#6H1][#6X2]                | 0.0    |
| [#8][#6][#6H2]              | 0.9914 | [OX1H0]=[CX3H0][CX2H0]#[CX2H1]    | 0.0    |
| [OX2H1]                     | 0.9702 | [CX2H0](#[CX2H0])[CX2H0]          | 0.0    |
| [CX4H2][CX4H2]              | 0.9205 | [CX4H1]([OX2H0])[CX4H1][CX2H0]    | 0.0    |
| [CX4H2]([CX4H2])[CX4H2]     | 0.8843 | [CX3H0](=[CX3H1]([OX2H0])[CX2H0]) | 0.0    |
| [CX4H2]([#6])[O]            | 0.8636 | [CX2H0](#[CX2H0])[CX4H0]          | 0.0    |
| [#6H1][#6H2]                | 0.852  | CCC=CC#C                          | 0.0    |
| [CH2X4](O)[CX4H2]           | 0.8464 | CC#CCC#C                          | 0.0    |
| worst negatives             | prob   | worst positives                   | prob   |
| [CX4H2]([CX4H2])[CX4H1]     | 0.642  | [CX3H1](=[CX3H2])[CX4H2]          | 0.0799 |
| [#6H2][#6H1][#6H1]=[#6H2]   | 0.6201 | OCC[CH2]                          | 0.544  |
| [CX3H1](=[CX3H2])[CX4H1]    | 0.6049 | [CX4H2][CX3H]                     | 0.5633 |
| [CX3H][CX4H]                | 0.5127 | [CX4H2][CX3]=C                    | 0.6176 |
| O[CX4H][CX4H2]              | 0.5    | [CX4H2]([CX4H2])[CX3H1]           | 0.6798 |
| [#6H1][#6H1]                | 0.4361 | [CX4H2]([OX2H1])[CX4H2]           | 0.6854 |
| [#6H3][#6]=[#6X3]           | 0.4348 | [CH2X3](=C)                       | 0.7111 |
| [#6X4H2][#6H1][#8H]         | 0.4044 | [CX3H2]=[CX3H1]                   | 0.8066 |
| [#6X3H1][#6H1][#6H2]        | 0.3902 | [CH2X4](O)[CX4H2][CX4H2]          | 0.8106 |
| [OH][CX4H]                  | 0.3704 | [#6X3H2]                          | 0.8268 |

---

Example 87 true smiles: NCCCCN formula: C4H12N2  
Index of correct structure: 0 of 38  
True structure loss: 0.005709  
True structure:

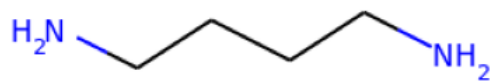

Experimental <sup>13</sup>C NMR (solvent: DMSO-d<sub>6</sub>)

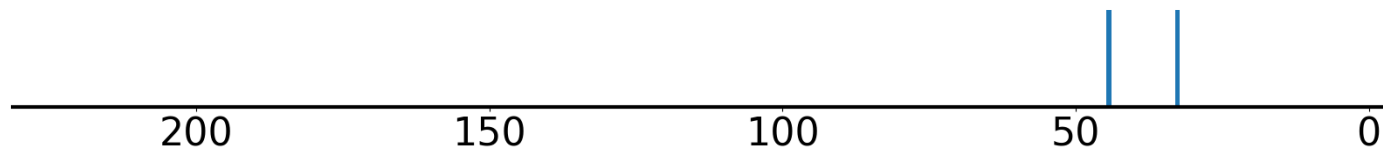

Experimental <sup>1</sup>H NMR (solvent: d<sub>2</sub>o)

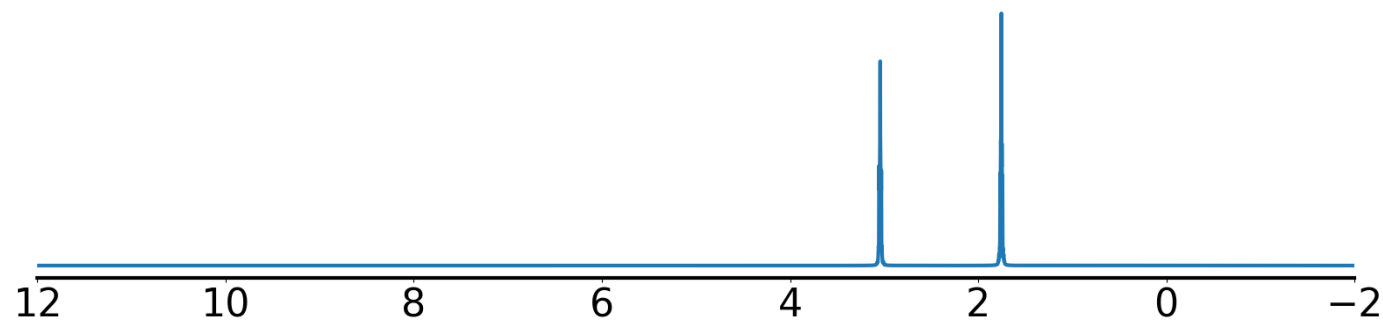

Top predicted structures (loss):

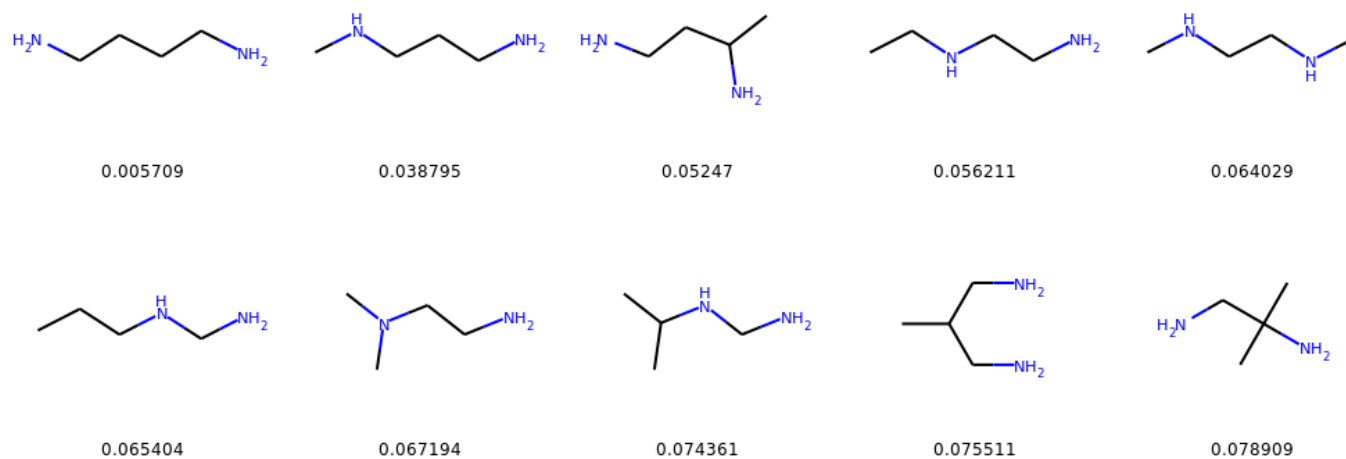



|                              |        |                                   |        |
|------------------------------|--------|-----------------------------------|--------|
| Top predicted substructures  | prob   |                                   |        |
| [#7X3H2]                     | 0.9961 | [#7][#6H2]                        | 0.9615 |
| [CX4H2]([#6])[#6]            | 0.9958 | [#7X3][#6H2]                      | 0.9447 |
| [CX4H2]([NX3H2])[CX4H2]      | 0.9806 | [CX4H2][CX4H2]                    | 0.8832 |
| [#7H2][#6H2]                 | 0.9686 | [CX4H2]([CX4H2])[CX4H2]           | 0.8122 |
| [#7][#6H2][#6H2]             | 0.9668 | [CX4H2][CX4H2][CX4H2][CX4H2]      | 0.6061 |
| best positives               | prob   | best negatives                    | prob   |
| [#7X3H2]                     | 0.9961 | [CX3H0](=[CX3H1])([OX2H0])[CX2H0] | 0.0    |
| [CX4H2]([#6])[#6]            | 0.9958 | [CX2H0](#[CX2H1])[CX3H0]          | 0.0    |
| [CX4H2]([NX3H2])[CX4H2]      | 0.9806 | C=CC=CC#C                         | 0.0    |
| [#7H2][#6H2]                 | 0.9686 | [CX2H0](#[CX2H1])[CX4H0]          | 0.0    |
| [#7][#6H2][#6H2]             | 0.9668 | CCC#CC#C                          | 0.0    |
| [#7][#6H2]                   | 0.9615 | [CX2H0](#[CX2H1])[CX3H1]          | 0.0    |
| [#7X3][#6H2]                 | 0.9447 | C=CCCC#C                          | 0.0    |
| [CX4H2][CX4H2]               | 0.8832 | [CX2H1]#[CX2H0][CX3H1]=[CX3H0]    | 0.0    |
| [CX4H2]([CX4H2])[CX4H2]      | 0.8122 | [CX3H0](=[CX3H1])([CX4H1])[CX2H0] | 0.0    |
| [CX4H2][CX4H2][CX4H2][CX4H2] | 0.6061 | [OX1H0]=[CX3H0][CX2H0]#[CX2H1]    | 0.0    |
| worst negatives              | prob   | worst positives                   | prob   |
| [#7X3H1]                     | 0.3223 | [#7][#6][#6][#6][#7]              | 0.2069 |
| [#7][#6][#6][#6][#7]         | 0.2652 | [CX4H2][CX4H2][CX4H2][CX4H2]      | 0.6061 |
| [#6H1]                       | 0.2029 | [CX4H2]([CX4H2])[CX4H2]           | 0.8122 |
| [CX4H2]([NX3H1])[CX4H2]      | 0.191  | [CX4H2][CX4H2]                    | 0.8832 |
| [#6H2][#7][#6H2]             | 0.1893 | [#7X3][#6H2]                      | 0.9447 |
| [#7][#6H2][#6H2][#6H1]       | 0.1671 | [#7][#6H2]                        | 0.9615 |
| [#7H2][#6H1]                 | 0.1173 | [#7][#6H2][#6H2]                  | 0.9668 |
| [#6H1][#6H2]                 | 0.1143 | [#7H2][#6H2]                      | 0.9686 |
| [CX4H2]([CX4H2])[CX4H1]      | 0.0796 | [CX4H2]([NX3H2])[CX4H2]           | 0.9806 |
| [#7][#6H2][#6H2][#7]         | 0.0693 | [CX4H2]([#6])[#6]                 | 0.9958 |

---

Example 88 true smiles: CNCCNC formula: C4H12N2  
Index of correct structure: 2 of 38  
True structure loss: 0.034946  
True structure:

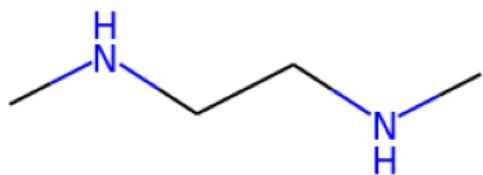

Experimental <sup>13</sup>C NMR (solvent: CDCl<sub>3</sub>)

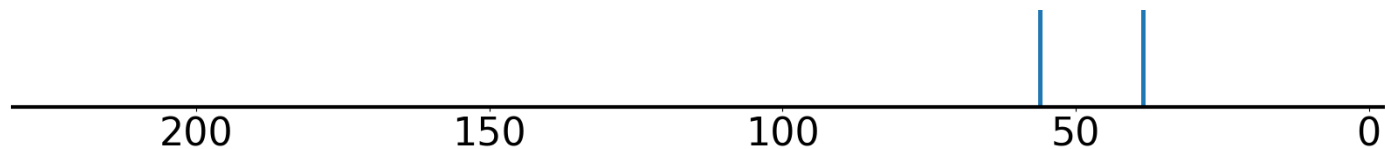

Experimental <sup>1</sup>H NMR (solvent: CDCl<sub>3</sub>)

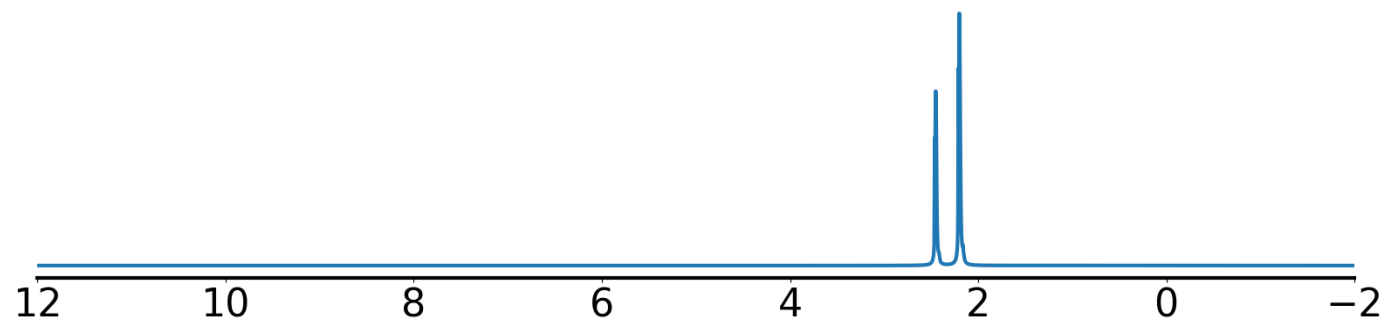

Top predicted structures (loss):

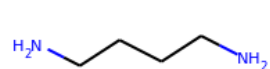

0.026146

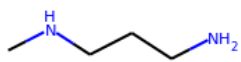

0.026977

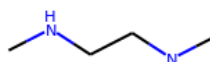

0.034946

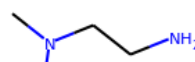

0.035562

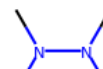

0.047696

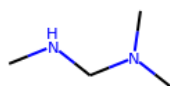

0.058505

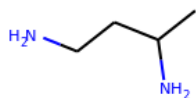

0.06904

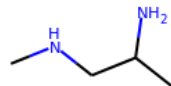

0.072935

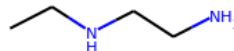

0.075883

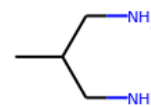

0.078749

|                             |        |                                   |        |
|-----------------------------|--------|-----------------------------------|--------|
| Top predicted substructures | prob   |                                   |        |
| [CX4H2]([#6])[#6]           | 0.9963 | [#6H1][#6H2]                      | 0.5691 |
| [#7X3H2]                    | 0.9838 | [#7][#6H2][#6H2]                  | 0.5633 |
| [#7][#6H2]                  | 0.6338 | [#7H2][#6H1]                      | 0.5595 |
| [#7X3][#6H3]                | 0.6169 | [#6H1]                            | 0.5207 |
| [#6H3][#7]                  | 0.5927 | [CX4H2]([NX3H2])[CX4H2]           | 0.4082 |
| best positives              | prob   | best negatives                    | prob   |
| [#7][#6H2]                  | 0.6338 | [CX2H0](#[CX2H1])[CX3H0]          | 0.0    |
| [#7X3][#6H3]                | 0.6169 | C=CC=CC#C                         | 0.0    |
| [#6H3][#7]                  | 0.5927 | CCC#CC#C                          | 0.0    |
| [#7][#6H2][#6H2]            | 0.5633 | [#6X2][#6H1][#6X2]                | 0.0    |
| [CX4H2][CX4H2]              | 0.3981 | CC=CCC#C                          | 0.0    |
| [#7X3H1]                    | 0.3914 | [CX2H1]#[CX2H0][CX3H1]=[CX3H0]    | 0.0    |
| [#7X3][#6H2]                | 0.3854 | [CX3H0](=[CX3H1])([OX2H0])[CX2H0] | 0.0    |
| [CX4H3][NX3H1]              | 0.3205 | CC=CC#CC                          | 0.0    |
| [#6H3][#7][#6H2]            | 0.2839 | [CX2H0](#[CX2H1])[CX3H1]          | 0.0    |
| [#7][#6][#6][#7]            | 0.2628 | [OX1H0]=[CX3H0][CX2H0]#[CX2H1]    | 0.0    |
| worst negatives             | prob   | worst positives                   | prob   |
| [CX4H2]([#6])[#6]           | 0.9963 | [CX4H2]([NX3H1])[CX4H2]           | 0.0396 |
| [#7X3H2]                    | 0.9838 | [#7][#6H2][#6H2][#7]              | 0.0571 |
| [#6H1][#6H2]                | 0.5691 | [CX4H3]                           | 0.1436 |
| [#7H2][#6H1]                | 0.5595 | [#7][#6][#6][#7]                  | 0.2628 |
| [#6H1]                      | 0.5207 | [#6H3][#7][#6H2]                  | 0.2839 |
| [CX4H2]([NX3H2])[CX4H2]     | 0.4082 | [CX4H3][NX3H1]                    | 0.3205 |
| [#6H1]([#6H2])[#6H2]        | 0.3634 | [#7X3][#6H2]                      | 0.3854 |
| [CX4H2]([CH])[CH]           | 0.2229 | [#7X3H1]                          | 0.3914 |
| [#7X3H0]                    | 0.2172 | [CX4H2][CX4H2]                    | 0.3981 |
| [#7][#6][#6][#6][#7]        | 0.208  | [#7][#6H2][#6H2]                  | 0.5633 |

---

Example 89 true smiles: CC(=O)C(=O)O formula: C3H4O3  
 Index of correct structure: 0 of 31  
 True structure loss: 0.01426  
 True structure:

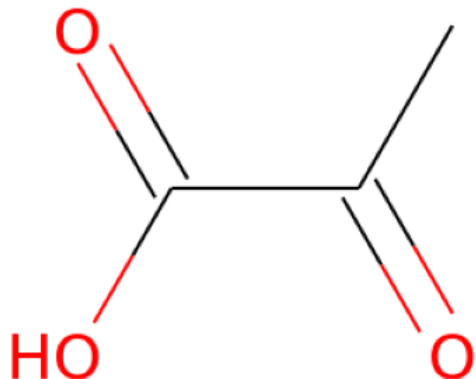

Experimental <sup>13</sup>C NMR (solvent: CDCl<sub>3</sub>)

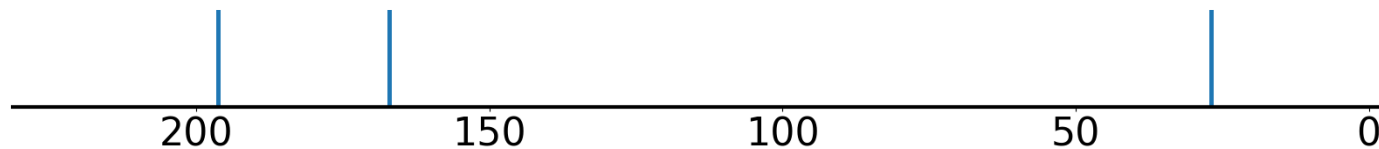

Experimental <sup>1</sup>H NMR (solvent: D<sub>2</sub>O)

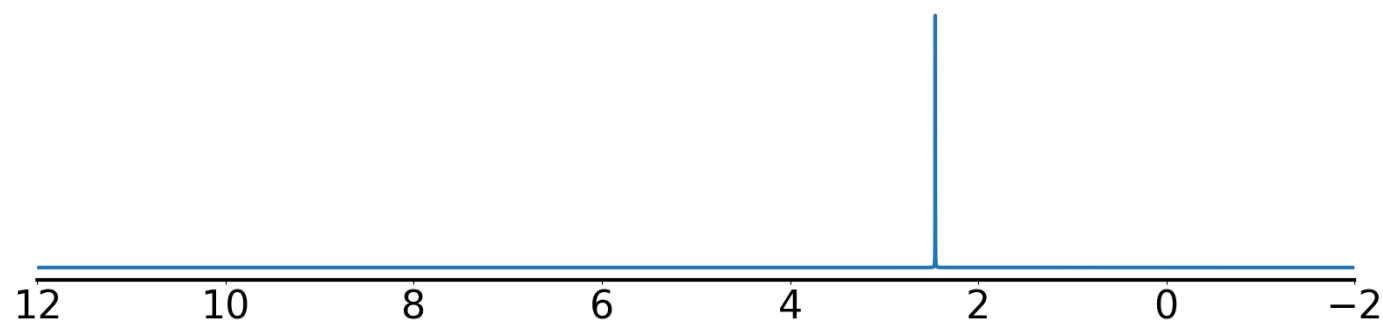

Top predicted structures (loss):

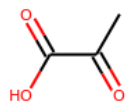

0.01426

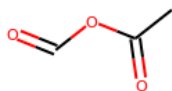

0.05062

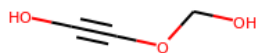

0.083965

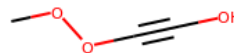

0.085776

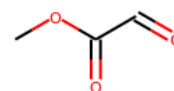

0.096801

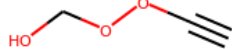

0.119405

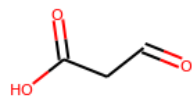

0.140115

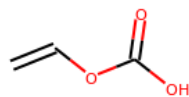

0.140649

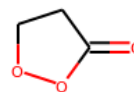

0.141668

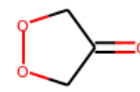

0.142443

|                               |        |                                              |        |
|-------------------------------|--------|----------------------------------------------|--------|
| Top predicted substructures   | prob   |                                              |        |
| [CX3](=[OX1])C                | 0.9961 | [CX4H3][#6]                                  | 0.9859 |
| [CX4H3]                       | 0.9941 | [#6H3][#6H0]                                 | 0.9799 |
| [CX4H3][CX3H0]                | 0.9918 | [#6H3][#6][#6]                               | 0.9725 |
| [OX1H0]=[CX3H0][CX4H3]        | 0.991  | [#6X3][#6X3]                                 | 0.9517 |
| [CX4H3][CX3]                  | 0.9888 | [#8]=[#6][#8]                                | 0.8887 |
| best positives                | prob   | best negatives                               | prob   |
| [CX3](=[OX1])C                | 0.9961 | [OX2H0][CX4H2][CX4H1]([CX4H1])[CX4H1]        | 0.0    |
| [CX4H3]                       | 0.9941 | [OX2H0]1[CX4H2][CX4H2][CX4H1][CX4H1]1        | 0.0    |
| [CX4H3][CX3H0]                | 0.9918 | [OX2H1][CX4H1]1[CX4H1][CX4H2][CX4H1]1        | 0.0    |
| [OX1H0]=[CX3H0][CX4H3]        | 0.991  | CCC#CC#C                                     | 0.0    |
| [CX4H3][CX3]                  | 0.9888 | [CX3H1](=[CX3H2])[CX2H0]                     | 0.0    |
| [CX4H3][#6]                   | 0.9859 | [CX4H3][CX2H0]                               | 0.0    |
| [#6H3][#6H0]                  | 0.9799 | [OX2H0][CX4H1][CX4H1]([CX4H2][CX4H1])[CX4H1] | 0.0    |
| [#6H3][#6][#6]                | 0.9725 | [CX4H0]([NX3H1])([CX4H2])([CX4H2])[CX4H1]    | 0.0    |
| [#6X3][#6X3]                  | 0.9517 | CC=CC#CC                                     | 0.0    |
| [#8]=[#6][#8]                 | 0.8887 | [CX2H0](#[CX2H1])[CX2H0]                     | 0.0    |
| worst negatives               | prob   | worst positives                              | prob   |
| O=[#6][#6][#6X3]              | 0.3758 | [CH3]CC[OH]                                  | 0.0046 |
| [CX4H2][CX3]=O                | 0.3067 | [CX3H0](=[OX1H0])([OX2H1])[CX3H0]            | 0.5162 |
| [#6X3][#6][#6][#6H3]          | 0.2158 | [#8][#6][#6]=[#8]                            | 0.5199 |
| [CX4H2]CC=O                   | 0.1623 | [CX3H0](=[OX1H0])([CX4H3])[CX3H0]            | 0.5874 |
| [#8]=[#6][#6][#6][#6]=[#8]    | 0.1588 | [CX3](=O)[OX2H1]                             | 0.6505 |
| [#8]=[#6][#6]=[#6][#6]=[#8]   | 0.1415 | [CX4H3][CX3H0][CX3]=O                        | 0.684  |
| [#8][#6][#6]=[#6][#6]=[#8]    | 0.1372 | [OX1H0]=[CX3H0][CX3H0][CX4H3]                | 0.7392 |
| [#8][#6][#6][#6X3]            | 0.1361 | [OX2H1]                                      | 0.7812 |
| [OX1H0]=[CX3H0]([#6])[CX4H2]  | 0.1198 | [CX3](=[OX1])O                               | 0.7955 |
| [#8]=[#6X3][#6X3][#6X3][#6H3] | 0.1136 | [#8]=[#6][#6]=[#8]                           | 0.8025 |

---

Example 90 true smiles: CC(C)C#N formula: C4H7N  
Index of correct structure: 0 of 29  
True structure loss: 0.016232  
True structure:

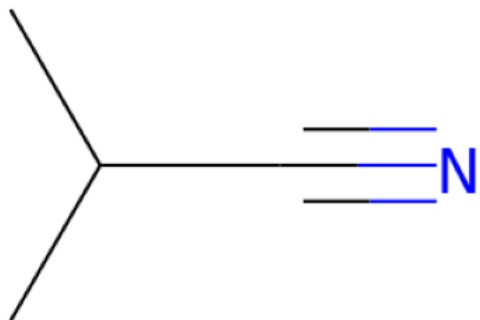

Experimental <sup>13</sup>C NMR (solvent: CDCl<sub>3</sub>)

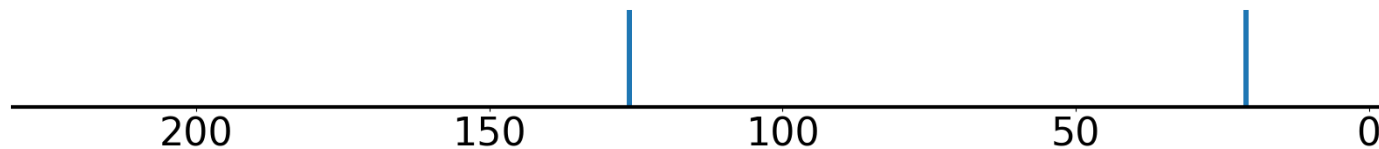

Experimental <sup>1</sup>H NMR (solvent: CDCl<sub>3</sub>)

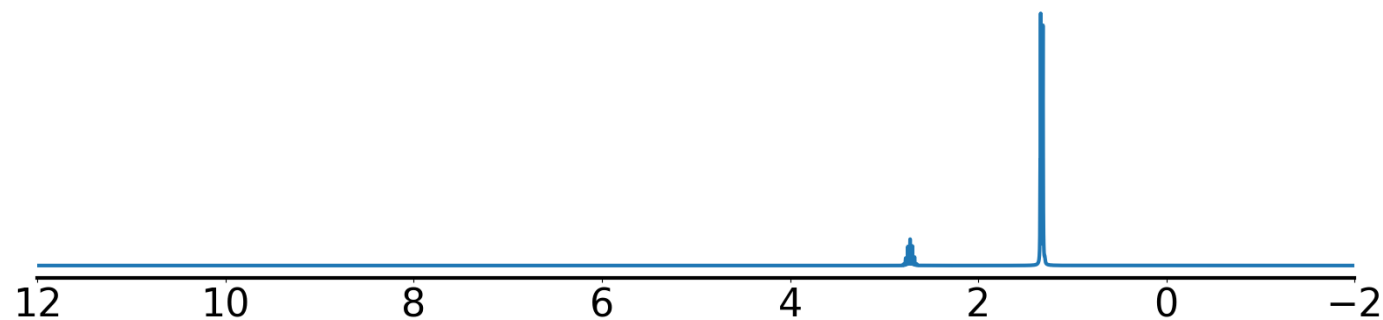

Top predicted structures (loss):

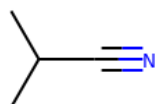

0.016232

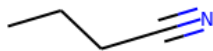

0.039139

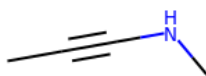

0.059375

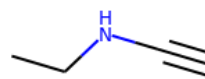

0.063271

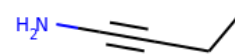

0.06503

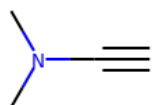

0.067799

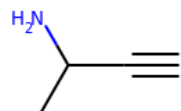

0.070512

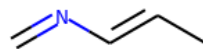

0.075706

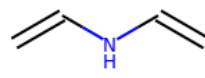

0.076914

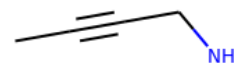

0.081474

|                             |        |                                        |        |
|-----------------------------|--------|----------------------------------------|--------|
| Top predicted substructures | prob   |                                        |        |
| [#6H3][#6][#6]              | 0.9943 | [CX4H3][CX4H1]                         | 0.5524 |
| [CX4H3]                     | 0.9938 | [CX4H2]( [#6] ) [#6]                   | 0.5225 |
| [CX4H3][#6]                 | 0.9934 | [#6H3][#6H0]                           | 0.3286 |
| [#6]#[#7]                   | 0.6312 | [#7X3H1]                               | 0.266  |
| [#6H1]                      | 0.6278 | [#7X3H2]                               | 0.2599 |
| best positives              | prob   | best negatives                         | prob   |
| [#6H3][#6][#6]              | 0.9943 | [OX2H0]1[CX4H2][CX4H2][CX4H1][CX4H1]1  | 0.0    |
| [CX4H3]                     | 0.9938 | [OX2H0]1[CX4H2][CX4H1][CX4H1]1         | 0.0    |
| [CX4H3][#6]                 | 0.9934 | [CX3H2]=[CX3H0][OX2H0][CX4H2]          | 0.0    |
| [#6]#[#7]                   | 0.6312 | [OX2H0][CX4H2][CX3H0][OX2H0]           | 0.0    |
| [#6H1]                      | 0.6278 | [CX3H0](=[CX3H2])([OX2H0])[CX3H0]      | 0.0    |
| [CX4H3][CX4H1]              | 0.5524 | [OX2H0]1[CX4H2][CX4H1][CX3H0]=[CX3H1]1 | 0.0    |
| [CHX4]( [CH3X4] ) [CH3X4]   | 0.2266 | [OX1H0]=[CX3H0]1[CX4H1][CX4H1][CX4H2]1 | 0.0    |
| [#6X2][#6X4H1]              | 0.1628 | [OX2H0r6][CX4H2r6][OX2H0r6]            | 0.0    |
| [CX2H0](#[NX1H0])[CX4H1]    | 0.1586 | [CX3H2]=[CX3H0][CX4H2][OX2H0]          | 0.0    |
| [#7]#[#6H0][#6H1]           | 0.1467 | [CX4H3][OX2H0][CX3H1]=[CX3H1]          | 0.0    |
| worst negatives             | prob   | worst positives                        | prob   |
| [CX4H2]( [#6] ) [#6]        | 0.5225 | [#7]#[#6H0][#6H1]                      | 0.1467 |
| [#6H3][#6H0]                | 0.3286 | [CX2H0](#[NX1H0])[CX4H1]               | 0.1586 |
| [#7X3H1]                    | 0.266  | [#6X2][#6X4H1]                         | 0.1628 |
| [#7X3H2]                    | 0.2599 | [CHX4]( [CH3X4] ) [CH3X4]              | 0.2266 |
| [cH]                        | 0.2112 | [CX4H3][CX4H1]                         | 0.5524 |
| [#6H3][#6H0][#6H1][#7]      | 0.2108 | [#6H1]                                 | 0.6278 |
| [#6H1][#6H1]                | 0.1935 | [#6]#[#7]                              | 0.6312 |
| [#6H3][#6][#6][#6H3]        | 0.1894 | [CX4H3][#6]                            | 0.9934 |
| [#6H2][#6X2]                | 0.1679 | [CX4H3]                                | 0.9938 |
| [CX4H3][CX4H0][CX4H3]       | 0.165  | [#6H3][#6][#6]                         | 0.9943 |

---

Example 91 true smiles: c1c[nH]cn1 formula: C3H4N2  
Index of correct structure: 0 of 26  
True structure loss: 0.026969  
True structure:

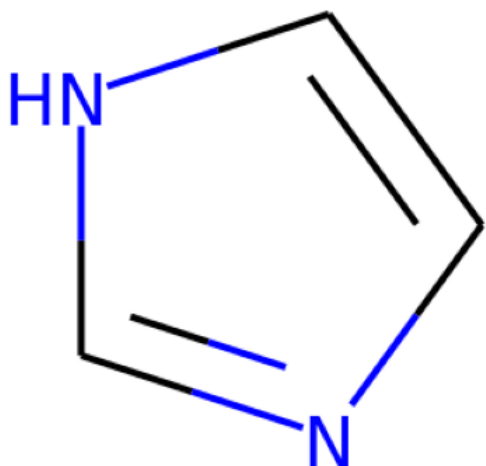

Experimental  $^{13}\text{C}$  NMR (solvent:  $\text{CDCl}_3$ )

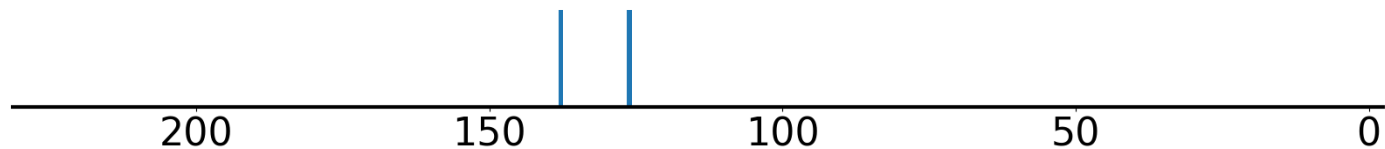

Experimental  $^1\text{H}$  NMR (solvent:  $\text{D}_2\text{O}$ )

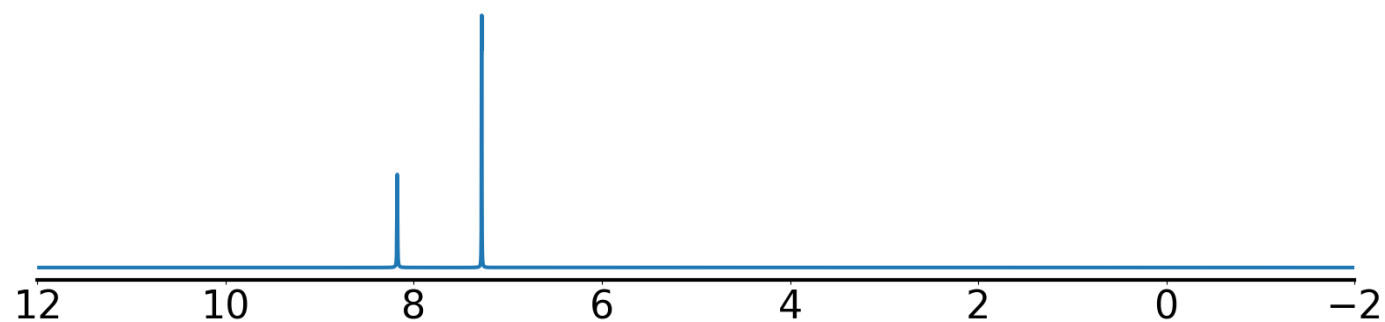

Top predicted structures (loss):

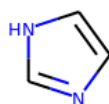

0.026969

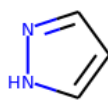

0.033607

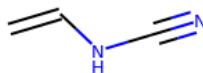

0.062508

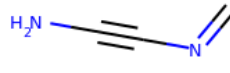

0.068495

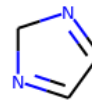

0.082974

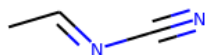

0.094676

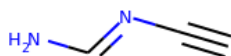

0.095782

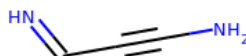

0.100306

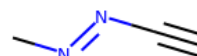

0.100809

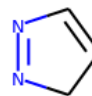

0.10102



| Top predicted substructures      | prob        |                                              |  |             |
|----------------------------------|-------------|----------------------------------------------|--|-------------|
| [#6H1]                           | 0.9973      | [#7][#6][#6][#6X3]                           |  | 0.8934      |
| [#6X3][#6X3]                     | 0.9912      | [#6H1][#7][#6H1]                             |  | 0.8373      |
| [cH]                             | 0.9798      | [cH][cH]                                     |  | 0.8314      |
| [#7][#6][#6X3]                   | 0.924       | [#7X3H2]                                     |  | 0.7951      |
| [#6X3H1][#6X3H0]                 | 0.9195      | [#6X3][#7][#6X3]                             |  | 0.6831      |
| <b>best positives</b>            | <b>prob</b> | <b>best negatives</b>                        |  | <b>prob</b> |
| [#6H1]                           | 0.9973      | [OX2H0]1[OX4H2][CX4H2][CX4H1][CX4H1]1        |  | 0.0         |
| [#6X3][#6X3]                     | 0.9912      | [OX2H1][CX4H1]1[OX4H1][CX4H2][CX4H1]1        |  | 0.0         |
| [cH]                             | 0.9798      | [CX4H0]([OX2H1])([CX4H3])([CX4H2])[CX4H1]    |  | 0.0         |
| [#7][#6][#6X3]                   | 0.924       | [OX1H0]=[CX3H0]1[OX4H1][CX4H1][CX4H2]1       |  | 0.0         |
| [#6H1][#7][#6H1]                 | 0.8373      | [OX2H0][CX4H1][CX4H1]([CX4H2][CX4H1])[CX4H1] |  | 0.0         |
| [cH][cH]                         | 0.8314      | [CX4H1]([OX2H1])([CX4H2])[CX2H0]             |  | 0.0         |
| [#6X3][#7][#6X3]                 | 0.6831      | [#8][#6H1][#6H2][#6H1]=[#8]                  |  | 0.0         |
| [#6H1][#6H1]                     | 0.6524      | [OX2H0]1[OX4H2][CX4H1][CX4H1]1               |  | 0.0         |
| [#6X3][#7X3][#6X3]               | 0.595       | [CX4H1]([OX2H0])([CX4H2])[CX2H0]             |  | 0.0         |
| [#7][#6][#6][#7]                 | 0.5501      | [CX4H0]([OX2H0])([CX4H3])([CX4H2])[CX3H1]    |  | 0.0         |
| <b>worst negatives</b>           | <b>prob</b> | <b>worst positives</b>                       |  | <b>prob</b> |
| [#6X3H1][#6X3H0]                 | 0.9195      | [cX3H1]([nX3H1])[cX3H1]                      |  | 0.1051      |
| [#7][#6][#6][#6X3]               | 0.8934      | [cX3H1]([nX2H0])[cX3H1]                      |  | 0.2178      |
| [#7X3H2]                         | 0.7951      | [#7H][#6X3H1]                                |  | 0.3892      |
| [#7][#6X3H0][#6X3H1]             | 0.6115      | [#6H1r5][#7]                                 |  | 0.4605      |
| [#6X3][#6X3][#6X3][#6X3]         | 0.599       | [#6]1[#6][#7][#6][#7]1                       |  | 0.4696      |
| [#7][#6H0][#6H1]                 | 0.5889      | [#7X3H1]                                     |  | 0.4857      |
| [cX3H1]([nX2H0])[cX3H0]          | 0.4794      | [#7][#6H1][#7]                               |  | 0.4911      |
| [#7H2][#6H0]                     | 0.373       | [#7][#6][#7]                                 |  | 0.5165      |
| [#6X3H1][#6X3H1][#6X3H0][#6X3H1] | 0.3574      | [#7][#6][#6][#7]                             |  | 0.5501      |
| [cX3H1]([cX3H1])[cX3H0]          | 0.3482      | [#6X3][#7X3][#6X3]                           |  | 0.595       |

---

Example 92 true smiles: CCC(C)=O formula: C4H8O  
Index of correct structure: 0 of 22  
True structure loss: 0.006633  
True structure:

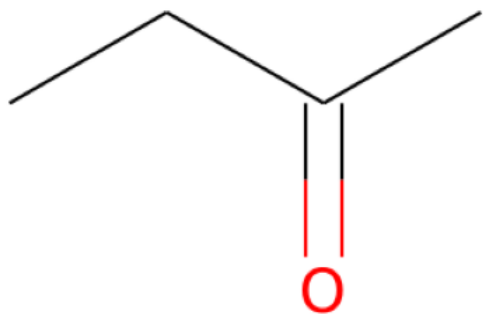

Experimental <sup>13</sup>C NMR (solvent: CDCl<sub>3</sub>)

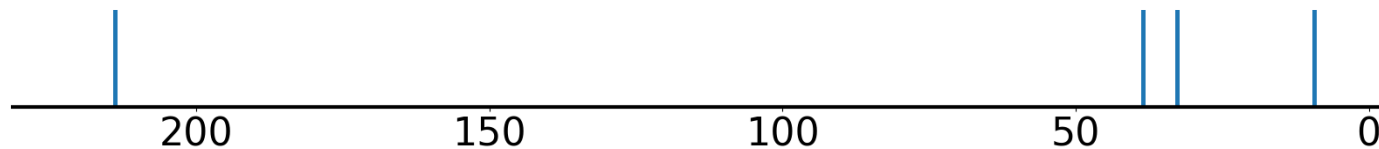

Experimental <sup>1</sup>H NMR (solvent: CDCl<sub>3</sub>)

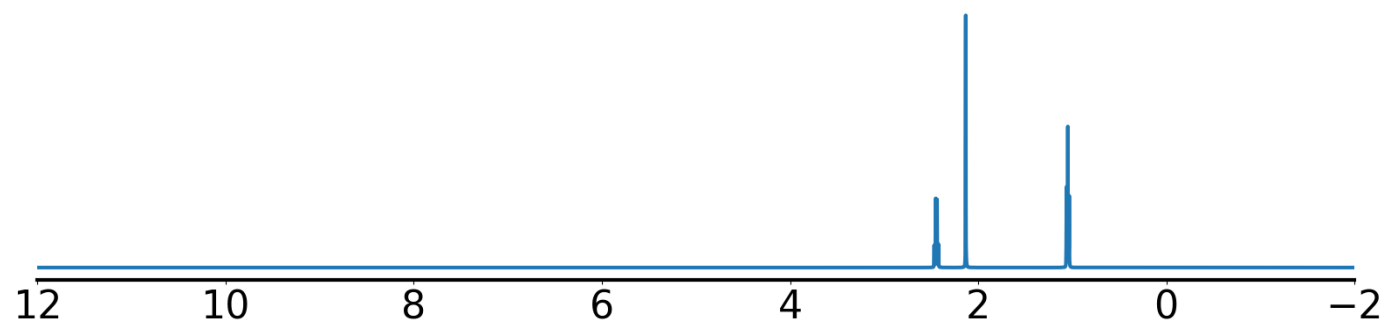

Top predicted structures (loss):

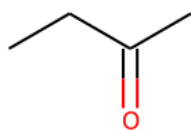

0.006633

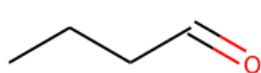

0.092054

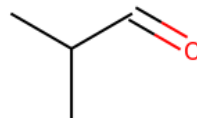

0.144201

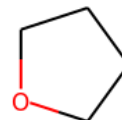

0.209105

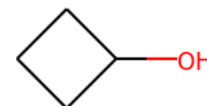

0.209332

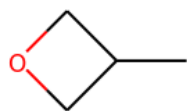

0.218539

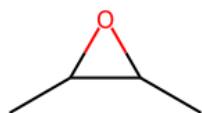

0.23338

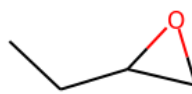

0.256734

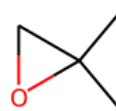

0.268562

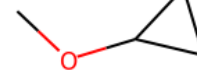

0.269362

|                                   |        |                                   |        |
|-----------------------------------|--------|-----------------------------------|--------|
| Top predicted substructures       | prob   |                                   |        |
| [CX4H3]                           | 0.9999 | [CX4H2]([CX4H3])[CX3H0]           | 0.9972 |
| [CX3](=[OX1])C                    | 0.9998 | [OX1H0]=[CX3H0]([#6])[CX4H2]      | 0.997  |
| [CX4H3][#6]                       | 0.9997 | [CX4H2]([#6])[#6]                 | 0.9969 |
| [OX1H0]=[CX3H0][CX4H2][CX4H3]     | 0.9996 | [CX4H3][CX4H2]                    | 0.9949 |
| [#6H3][#6][#6]                    | 0.9995 | [CX4H3][CX3]                      | 0.9879 |
| best positives                    | prob   | best negatives                    | prob   |
| [CX4H3]                           | 0.9999 | CCC=CC#C                          | 0.0    |
| [CX3](=[OX1])C                    | 0.9998 | [CX2H0](#[CX2H1])[CX2H0]          | 0.0    |
| [CX4H3][#6]                       | 0.9997 | C=CC=CC#C                         | 0.0    |
| [OX1H0]=[CX3H0][CX4H2][CX4H3]     | 0.9996 | C=CCCC#C                          | 0.0    |
| [#6H3][#6][#6]                    | 0.9995 | [CX3H0](=[CX3H1])([CX4H1])[CX2H0] | 0.0    |
| [CX4H2]([CX4H3])[CX3H0]           | 0.9972 | [CX3H1](=[CX3H2])[CX2H0]          | 0.0    |
| [OX1H0]=[CX3H0]([#6])[CX4H2]      | 0.997  | [CX2H0](#[CX2H1])[CX3H1]          | 0.0    |
| [CX4H2]([#6])[#6]                 | 0.9969 | CCC#CC#C                          | 0.0    |
| [CX4H3][CX4H2]                    | 0.9949 | CCC#CC=C                          | 0.0    |
| [CX4H3][CX3]                      | 0.9879 | [CX2H0](#[CX2H1])[CX3H0]          | 0.0    |
| worst negatives                   | prob   | worst positives                   | prob   |
| [CX4H2]CC=O                       | 0.522  | [#6H3][#6][#6][#6H3]              | 0.0783 |
| CCCCC                             | 0.2344 | [#6H3][#6X3H0][#6H2]              | 0.7131 |
| [#8][#6][#6H2]                    | 0.1886 | [#6H3][#6][#6X3]                  | 0.9038 |
| [#6X3][#6][#6][#6H3]              | 0.1871 | [CX3H0](=[OX1H0])([CX4H3])[CX4H2] | 0.9154 |
| [CX4H2]([CX4H2])[CX3H0]           | 0.1862 | [#6H3][#6H0]                      | 0.9377 |
| O=[CX3H0][CX4H2][CX4H2]           | 0.1615 | [CX4H3][CX3H0]                    | 0.9668 |
| [CX4H2][CX4H2]                    | 0.1608 | [OX1H0]=[CX3H0][CX4H3]            | 0.975  |
| [#6H2][#6X3H0][#6H2]              | 0.144  | [CX4H2][CX3]=O                    | 0.9784 |
| [#8]=[#6H0][#6H1]                 | 0.0776 | [CX4H3][CX3]                      | 0.9879 |
| [CX3H0](=[OX1H0])([CX4H2])[CX4H2] | 0.0757 | [CX4H3][CX4H2]                    | 0.9949 |

---

Example 93 true smiles: O=C(O)C(O)O formula: C2H4O4  
 Index of correct structure: 2 of 20  
 True structure loss: 0.032534  
 True structure:

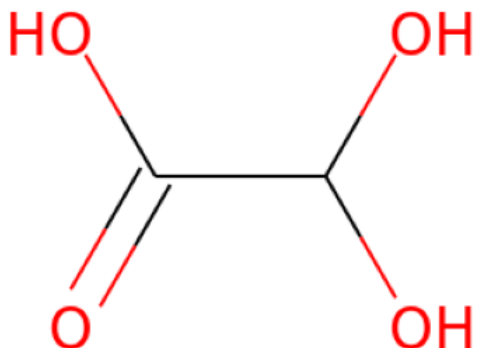

Experimental 13C NMR (solvent: D2O)

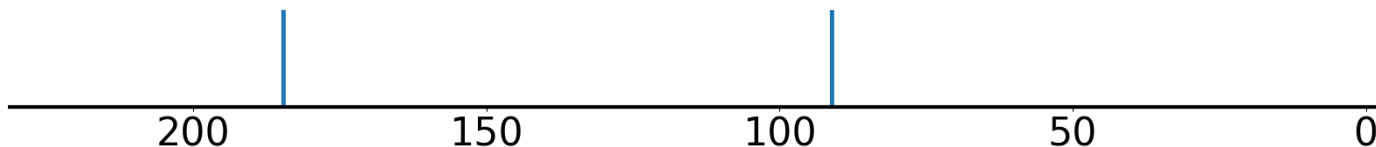

Experimental 1H NMR (solvent: D2O)

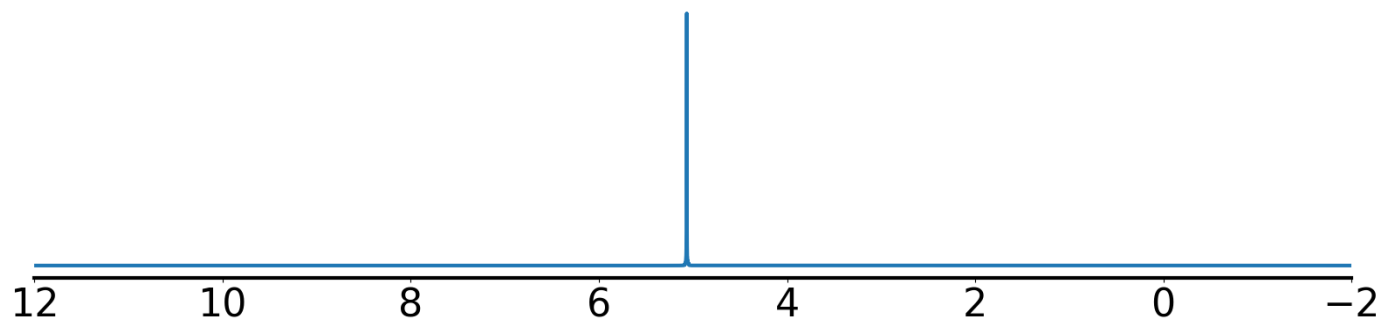

Top predicted structures (loss):

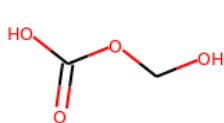

0.021618

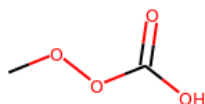

0.027758

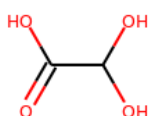

0.032534

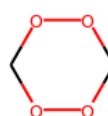

0.033064

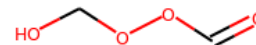

0.035346

Top predicted substructures

|                   |        |
|-------------------|--------|
| [CX3](=[OX1])C    | 0.987  |
| [OX2H1]           | 0.9604 |
| [#8][#6][#6]=[#8] | 0.833  |
| [#8]=[#6][#8]     | 0.7686 |
| [#8][#6][#6][#8]  | 0.723  |

best positives

|                   |        |
|-------------------|--------|
| [CX3](=[OX1])C    | 0.987  |
| [OX2H1]           | 0.9604 |
| [#8][#6][#6]=[#8] | 0.833  |
| [#8]=[#6][#8]     | 0.7686 |
| [#8][#6][#6][#8]  | 0.723  |

prob

|                       |        |
|-----------------------|--------|
| [#8]=[#6][#6H2][#8]   | 0.7207 |
| [CX4H2][CX3]=O        | 0.6389 |
| [CX3](=O)[OX2H1]      | 0.554  |
| [CX3](=[OX1])O        | 0.5335 |
| [CX4H2][OX2H0][CX4H2] | 0.4869 |

best negatives

|                                       |     |
|---------------------------------------|-----|
| [#6X2][#6H1][#6X2]                    | 0.0 |
| CCC#CC#C                              | 0.0 |
| [#7][#6][#6][#7]                      | 0.0 |
| CC=CCC#C                              | 0.0 |
| [OX2H0]1[CX4H2][CX4H2][CX4H1][CX4H1]1 | 0.0 |

prob

|                                   |        |                                   |        |
|-----------------------------------|--------|-----------------------------------|--------|
| [CX3](=O)[OX2H1]                  | 0.554  | [CX3H0](=[CX3H1])([CX4H1])[CX2H0] | 0.0    |
| [CX3](=[OX1])O                    | 0.5335 | C=CC=CC#C                         | 0.0    |
| [#8]=[#6H0][#6H1]                 | 0.4743 | [CX3H1](=[CX3H1])[CX2H0]          | 0.0    |
| [#8][#6H0][#6H1]                  | 0.439  | [CX4H1]([CX4H2])([CX4H1])[CX2H0]  | 0.0    |
| [CX3H0](=[OX1H0])([OX2H1])[CX4H1] | 0.1852 | CC=CC#CC                          | 0.0    |
| worst negatives                   | prob   | worst positives                   | prob   |
| [#8]=[#6][#6H2][#8]               | 0.7207 | [#8H][#6X4H1][#6X3H0]             | 0.0427 |
| [CX4H2][CX3]=O                    | 0.6389 | [OH][CX4H]                        | 0.0469 |
| [CX4H2][OX2H0][CX4H2]             | 0.4869 | O=[CX3][CX4H]                     | 0.0563 |
| [#8][#6][#6][#6X3]                | 0.4487 | [#6H1]                            | 0.0906 |
| [OX1H0]=[CX3H0]([#6])[CX4H2]      | 0.3157 | [CX4H](O)CO                       | 0.1059 |
| [OX2H0][CX4H2][#6H0]              | 0.3001 | [CX4H]O                           | 0.1062 |
| [CX3H0](=[OX1H0])([OX2H1])[CX4H2] | 0.2852 | [CX3H0](=[OX1H0])([OX2H1])[CX4H1] | 0.1852 |
| [CX4H2]([OX2H0])[OX2H0]           | 0.2841 | [#8][#6H0][#6H1]                  | 0.439  |
| [CX4H2]([#6])[O]                  | 0.2507 | [#8]=[#6H0][#6H1]                 | 0.4743 |
| [CX4H3]                           | 0.2375 | [CX3](=[OX1])O                    | 0.5335 |

---

Example 94 true smiles: CCCCCC formula: C8H18  
Index of correct structure: 0 of 18  
True structure loss: 0.007935  
True structure:

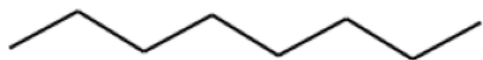

Experimental <sup>13</sup>C NMR (solvent: CDCl<sub>3</sub>)

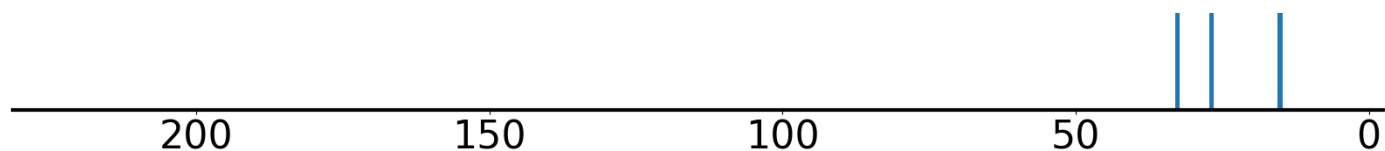

Experimental <sup>1</sup>H NMR (solvent: CDCl<sub>3</sub>)

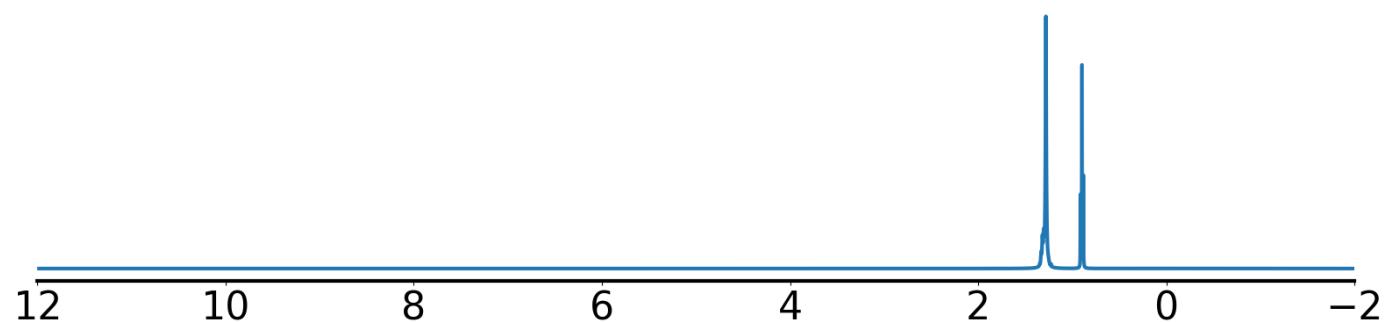

Top predicted structures (loss):

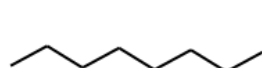

0.007935

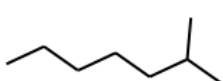

0.018618

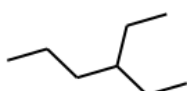

0.0269

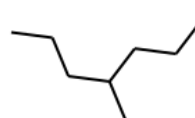

0.02816

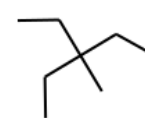

0.028807

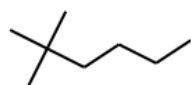

0.029564

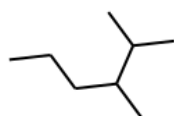

0.030285

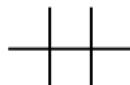

0.031262

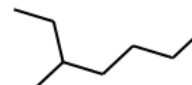

0.031736

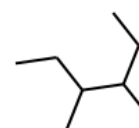

0.032579

Top predicted substructures

|                   |        |
|-------------------|--------|
| [CX4H3]           | 1.0    |
| [CX4H3][#6]       | 0.9999 |
| [#6H3][#6][#6]    | 0.9999 |
| [CX4H3][CX4H2]    | 0.9938 |
| [CX4H2][[#6]][#6] | 0.9644 |

best positives

|      |        |
|------|--------|
| prob | 1.0    |
|      | 0.9999 |
|      | 0.9999 |
|      | 0.9938 |
|      | 0.9644 |

prob

|                         |        |
|-------------------------|--------|
| [CX4H2]([CX4H3])[CX4H2] | 0.7286 |
| [#6H1]                  | 0.5866 |
| [CHX4]([CH3X4])[CH3X4]  | 0.5649 |
| [CX4H2]([CX4H2])[CX4H2] | 0.5328 |
| CCCCC                   | 0.4769 |

best negatives

|        |
|--------|
| 0.7286 |
| 0.5866 |
| 0.5649 |
| 0.5328 |
| 0.4769 |

prob

|                              |        |                                  |        |
|------------------------------|--------|----------------------------------|--------|
| [CX4H3]                      | 1.0    | [CX2H0](#[CX2H1])[cX3H0]         | 0.0    |
| [CX4H3][#6]                  | 0.9999 | CCC=CC#C                         | 0.0    |
| [#6H3][#6][#6]               | 0.9999 | CC=CC#CC                         | 0.0    |
| [CX4H3][CX4H2]               | 0.9938 | CC=CCC#C                         | 0.0    |
| [CX4H2](#[#6])[#6]           | 0.9644 | [CX2H0](#[CX2H1])[CX3H0]         | 0.0    |
| [CX4H2]([CX4H3])[CX4H2]      | 0.7286 | [CX2H0](#[CX2H1])[CX4H2]         | 0.0    |
| [CX4H2]([CX4H2])[CX4H2]      | 0.5328 | [CX2H0](#[CX2H1])[CX3H1]         | 0.0    |
| CCCCC                        | 0.4769 | #[#7][#6]=[#6][#6]#[#7]          | 0.0    |
| [CX4H2][CX4H2]               | 0.4536 | #[6X2][#6H1][#6X2]               | 0.0    |
| [CX4H2][CX4H2][CX4H2][CX4H2] | 0.3337 | [CX4H1]([OX2H0])([CX4H1])[CX2H0] | 0.0    |
| -----                        |        |                                  |        |
| worst negatives              | prob   | worst positives                  | prob   |
| #[6H1]                       | 0.5866 | [CX4H2][CX4H2][CX4H2][CX4H2]     | 0.3337 |
| [CHX4]([CH3X4])[CH3X4]       | 0.5649 | [CX4H2][CX4H2]                   | 0.4536 |
| [CX4H3][CX4H1]               | 0.3963 | CCCCC                            | 0.4769 |
| [#6H3][#6][#6][#6H3]         | 0.2745 | [CX4H2]([CX4H2])[CX4H2]          | 0.5328 |
| [#6H1][#6H2]                 | 0.1841 | [CX4H2]([CX4H3])[CX4H2]          | 0.7286 |
| [CX4H3][CX4]O                | 0.1667 | [CX4H2](#[#6])[#6]               | 0.9644 |
| [#6H3][#6H0]                 | 0.1047 | [CX4H3][CX4H2]                   | 0.9938 |
| [#6H1][#6H1]                 | 0.0712 | #[6H3][#6][#6]                   | 0.9999 |
| #[6H2][#6H1r3]               | 0.0709 | [CX4H3][#6]                      | 0.9999 |
| [CX4H2]([CX4H3])[CX4H1]      | 0.0703 | [CX4H3]                          | 1.0    |
