# Supplementary material for: A framework for automated structure elucidation from routine NMR spectra
Source: Royal Society of Chemistry journal article supplement (doi:10.1039/d1sc04105c), 2021-01-01
Supplement: d1sc04105c5.pdf [file d1sc04105c5.pdf]

## Detailed validation dataset results

This document provides details on the framework's performance in predicting for the substructure probabilities and the ranking of candidate molecular structures for each molecule in our validation set, as well as the experimental  $^1\text{H}$  and  $^{13}\text{C}$  NMR spectra used as input. The data is ordered by the number of possible constitutional isomers generated by OMG using the molecular formula (SI section 3.5), starting with the largest. For each molecule, the SMILES string and molecular formula corresponding to the true molecular structure are listed first.

“Index of correct structure” denotes the rank of the correct structure as predicted for by our framework, with an index of “0” meaning that the correct structure was ranked as the most likely structure by our framework, “1” meaning the correct structure was the second ranked structure, and so on. An index of “-1” indicates that the correct structure was not generated as part of the ranked list of structures predicted for by our molecular graph generation algorithm. This index is reported alongside the total number of possible constitutional isomers for this molecular formula as generated by OMG.

“True structure loss” is the binary cross-entropy (BCE) loss between the predicted substructure probabilities and the correct structure substructure labels (SI section 3.5). A lower loss indicates better agreement between the ML-predicted substructure probabilities and the true substructure label, with 0 being perfect agreement.

The true structure is shown next along with the experimental  $^{13}\text{C}$  and  $^1\text{H}$  NMR spectra. The solvent in which the NMR spectra was collected in is noted in parentheses when available.

The 10 structures with the lowest BCE loss generated by our framework, sorted from lowest (most likely) to highest, are shown next. For each of the top 10 predicted molecular structures, the BCE loss between its ML-predicted substructure probabilities and the true structure's substructure label is displayed below an image of the predicted molecule's 2D structure.

For each molecule, additional details for the substructure predictions are shown on the following page. First, the top 10 highest probability substructures predicted for by our ML model are shown as SMARTS strings alongside their respective predicted probabilities. Next, the 10 highest probability true positive substructures (“best positives”) are shown. These are the substructures present in the true structure that the model predicted to be present with a high probability. Substructures listed under “best negatives”, “worst negatives”, and “worst positives” correspond to the lowest probability true negatives, highest probability false positives, and lowest probability false negatives, respectively.

Example 0 true smiles: N=C(N)NCCCC(=O)O formula: C5H11N3O2

Index of correct structure: 8 of 677501

True structure loss: 0.030339

True structure:

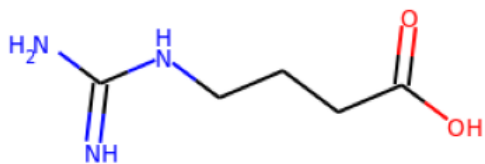

Experimental  $^{13}\text{C}$  NMR (solvent:  $\text{D}_2\text{O}$ )

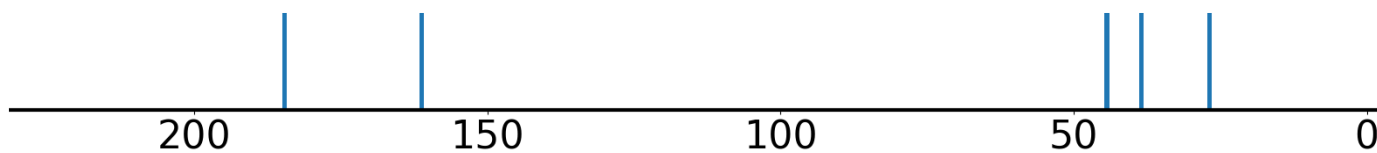

Experimental  $^1\text{H}$  NMR (solvent:  $\text{D}_2\text{O}$ )

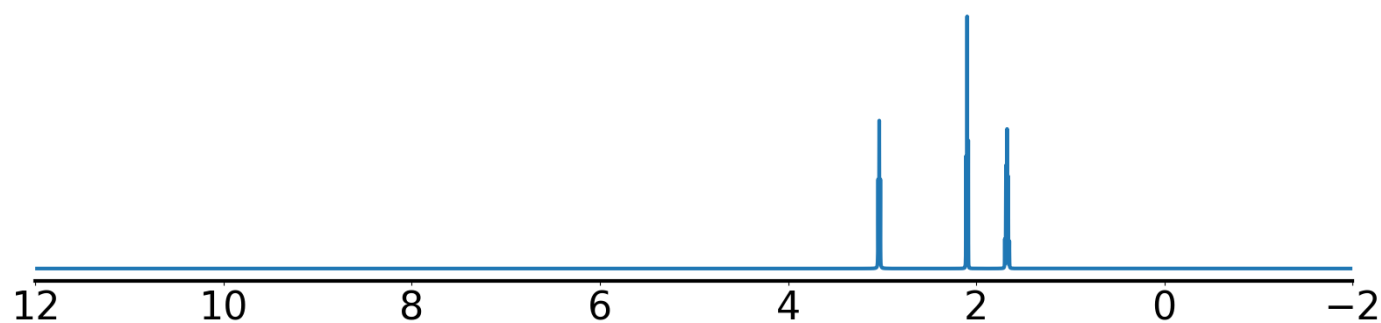

Top predicted structures (loss):

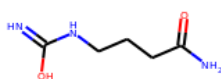

0.021364

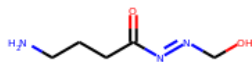

0.024313

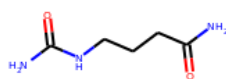

0.02474

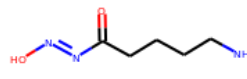

0.025733

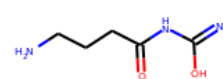

0.028428

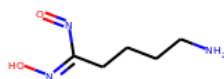

0.029822

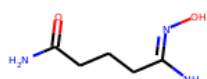

0.030128

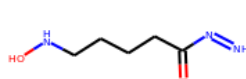

0.030274

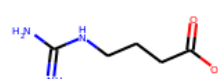

0.030339

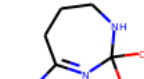

0.030498

|                             |        |                                   |        |
|-----------------------------|--------|-----------------------------------|--------|
| Top predicted substructures | prob   |                                   |        |
| [CX4H2]([#6])[#6]           | 0.9972 | [#7X3][#6H2]                      | 0.9146 |
| [#7X3H2]                    | 0.9838 | [OX2H1]                           | 0.8938 |
| [CX3](=[OX1])C              | 0.9587 | [CX4H2][CX4H2]                    | 0.8604 |
| [#7][#6H2][#6H2]            | 0.9538 | [CX4H2]CC=O                       | 0.841  |
| [#7][#6H2]                  | 0.9306 | [CX4H2]([CX4H2])[CX3H0]           | 0.7779 |
| best positives              | prob   | best negatives                    | prob   |
| [CX4H2]([#6])[#6]           | 0.9972 | C=CC=CC#C                         | 0.0    |
| [#7X3H2]                    | 0.9838 | [CX2H1]#[CX2H0][CX3H1]=[CX3H0]    | 0.0    |
| [CX3](=[OX1])C              | 0.9587 | [CX2H0]#[CX2H0][CX2H0]            | 0.0    |
| [#7][#6H2][#6H2]            | 0.9538 | [CX3H0](=[CX3H1])([CX4H2])[CX2H0] | 0.0    |
| [#7][#6H2]                  | 0.9306 | [CX2H0]#[CX2H1][cX3H0]            | 0.0    |
| [#7X3][#6H2]                | 0.9146 | [CX3H0](=[CX3H1])([OX2H0])[CX2H0] | 0.0    |
| [OX2H1]                     | 0.8938 | CC#CCC=C                          | 0.0    |
| [CX4H2][CX4H2]              | 0.8604 | CC=CCC#C                          | 0.0    |
| [CX4H2]CC=O                 | 0.841  | [CX2H0]#[CX2H1][CX4H0]            | 0.0    |
| [CX4H2]([CX4H2])[CX3H0]     | 0.7779 | C=CCCC#C                          | 0.0    |
| worst negatives             | prob   | worst positives                   | prob   |
| [CX4H2]([NX3H2])[CX4H2]     | 0.5724 | [OX1H0]=[CX3H0]([#8])[CX4H2]      | 0.0418 |
| [#7H2][#6H2]                | 0.5509 | [#7][#6]([#7])=[#7]               | 0.0897 |
| [#7][#6][#6][#6X3]          | 0.3595 | [#8][#6][#6H2]                    | 0.1089 |
| [#7][#6][#6][#6][#7]        | 0.2792 | [CX3H0](=[OX1H0])([OX2H1])[CX4H2] | 0.134  |
| [#6H1][#6H2]                | 0.272  | [#8]=[#6][#8]                     | 0.2531 |
| [#7][#6][#6][#6][#6][#7]    | 0.2362 | [CX3]([OX1])O                     | 0.2953 |
| [#8]=[#6H0][#6H1]           | 0.1883 | OCC[CH2]                          | 0.3515 |
| [#6H1]                      | 0.1817 | [#7H2][#6H0]                      | 0.5193 |
| [#7X3H0]                    | 0.1753 | [#7X3H1]                          | 0.5285 |
| [#7][#6][#6X3]              | 0.1204 | [CX4H2]([NX3H1])[CX4H2]           | 0.5364 |

---

Example 1 true smiles: Cn1ccc(=O)n(C)c1=O formula: C6H8N2O2  
 Index of correct structure: 0 of 623393  
 True structure loss: 0.031526  
 True structure:

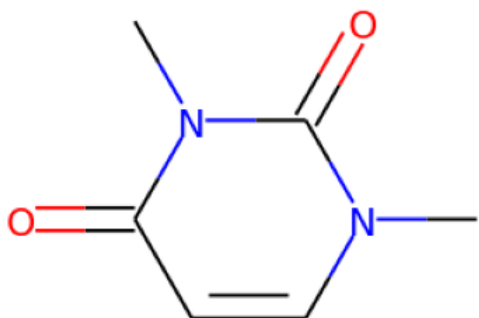

Experimental <sup>13</sup>C NMR (solvent: CDCl<sub>3</sub>)

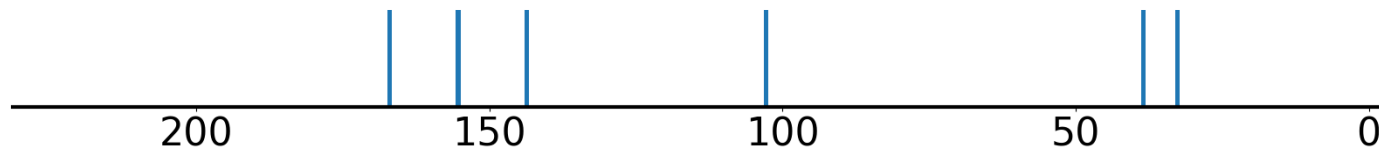

Experimental <sup>1</sup>H NMR (solvent: D<sub>2</sub>O)

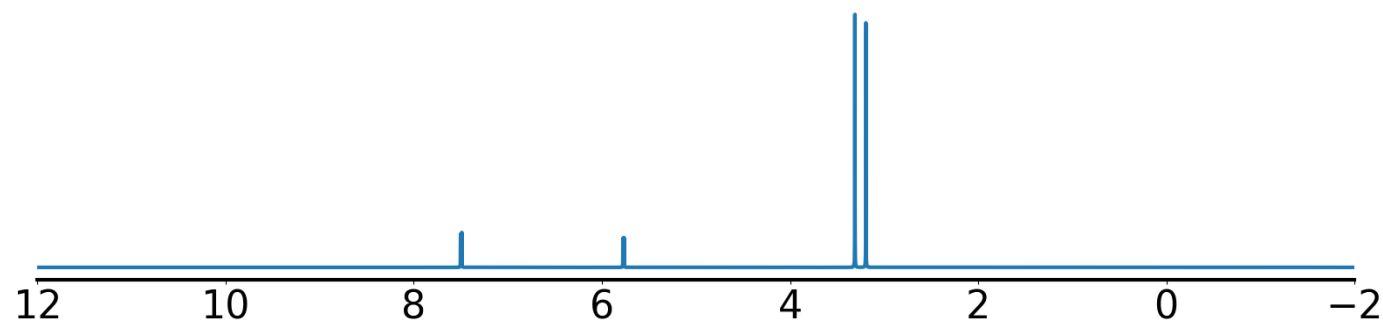

Top predicted structures (loss):

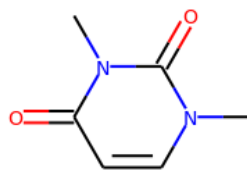

0.031526

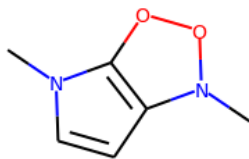

0.03894

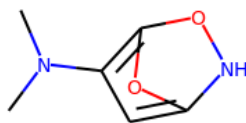

0.041776

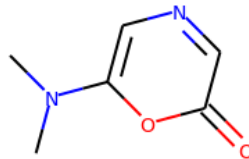

0.042338

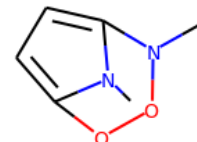

0.044092

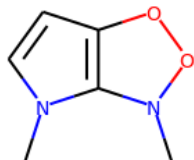

0.0446

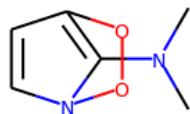

0.045601

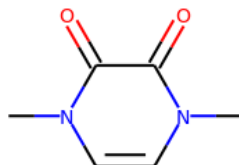

0.047015

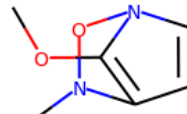

0.047597

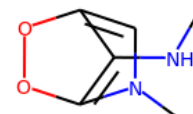

0.047685

|                             |        |                                              |        |
|-----------------------------|--------|----------------------------------------------|--------|
| Top predicted substructures | prob   |                                              |        |
| [#7X3][#6H3]                | 0.9986 | [#6H3][#7][#6X3]                             | 0.8865 |
| [#6H1]                      | 0.988  | [#6X3][#7][#6X3]                             | 0.8583 |
| [#6H3][#7]                  | 0.969  | [#7][#6][#6X3]                               | 0.8576 |
| [CX4H3]                     | 0.9559 | [#7][#6][#6][#6X3]                           | 0.8361 |
| [#6X3][#6X3]                | 0.9119 | [#7X3H0]                                     | 0.766  |
| best positives              | prob   | best negatives                               | prob   |
| [#7X3][#6H3]                | 0.9986 | [OX2H0]1[CX4H2][CX4H2][CX4H1][CX4H1]1        | 0.0    |
| [#6H1]                      | 0.988  | [CX2H0](#[CX2H1])[CX2H0]                     | 0.0    |
| [#6H3][#7]                  | 0.969  | [OX2H1][CX4H1][CX4H1]([CX4H1])[CX4H1]        | 0.0    |
| [CX4H3]                     | 0.9559 | CCC#CC#C                                     | 0.0    |
| [#6X3][#6X3]                | 0.9119 | [#6H3][#6H2][#6H1r4]                         | 0.0    |
| [#6H3][#7][#6X3]            | 0.8865 | [OX2H0][CX4H2][CX4H2][CX4H1][OX2H0]          | 0.0    |
| [#6X3][#7][#6X3]            | 0.8583 | [CX4H1]([CX4H3])([CX4H2])[CX4H0]             | 0.0    |
| [#7][#6][#6X3]              | 0.8576 | [OX2H0][CX4H1][CX4H1]([CX4H2][CX4H1])[CX4H1] | 0.0    |
| [#7][#6][#6][#6X3]          | 0.8361 | [CX2H0](#[CX2H0])[CX2H0]                     | 0.0    |
| [#7X3H0]                    | 0.766  | [OX2H0][CX4H2][CX4H1]([CX4H1])[CX4H1]        | 0.0    |
| worst negatives             | prob   | worst positives                              | prob   |
| [CX4H3][NX3H0]              | 0.5633 | [cX3H1]([NX3H0])[cX3H1]                      | 0.1523 |
| [CX3](=[OX1])C              | 0.53   | [#7][#6H0][#7]                               | 0.2196 |
| [#8][#6][#6][#6X3]          | 0.4202 | [#7][#6][#7]                                 | 0.2353 |
| [#8][#6H0][#6H1]            | 0.4173 | [#7][#6][#6][#6][#7]                         | 0.2377 |
| [CX4H2]([#6])[#6]           | 0.3802 | [OX1H0]=[cX3H0][cX3H1]                       | 0.2437 |
| [#6X3][#6H2][#6X3]          | 0.367  | [#8]=[#6][#6H1][#6H1]                        | 0.259  |
| [#8][#6][#6H2]              | 0.3665 | [#8]=[#6H0][#6H1]                            | 0.3397 |
| [#7X3H1]                    | 0.3581 | [#6H1][#6H1]                                 | 0.3729 |
| [OX2H1]                     | 0.3365 | O=[cX3]                                      | 0.4465 |
| [#6H1][#6H2]                | 0.3315 | [#7][#6X3H0][#6X3H1]                         | 0.4526 |

---

Example 2 true smiles: CNC(=O)c1cccn1 formula: C7H8N2O  
 Index of correct structure: -1 of 376372  
 True structure loss: 0.02822  
 True structure:

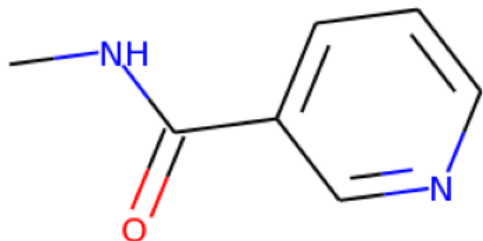

Experimental <sup>13</sup>C NMR (solvent: CDCl<sub>3</sub>)

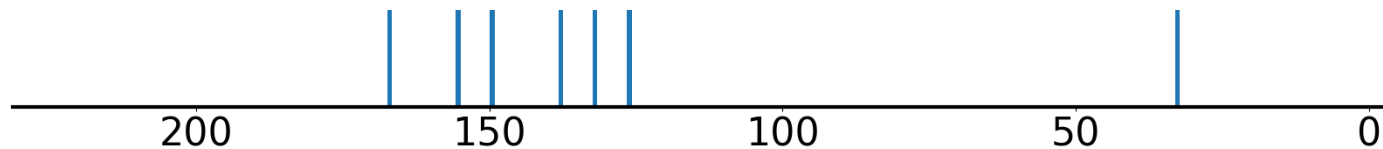

Experimental <sup>1</sup>H NMR (solvent: D<sub>2</sub>O)

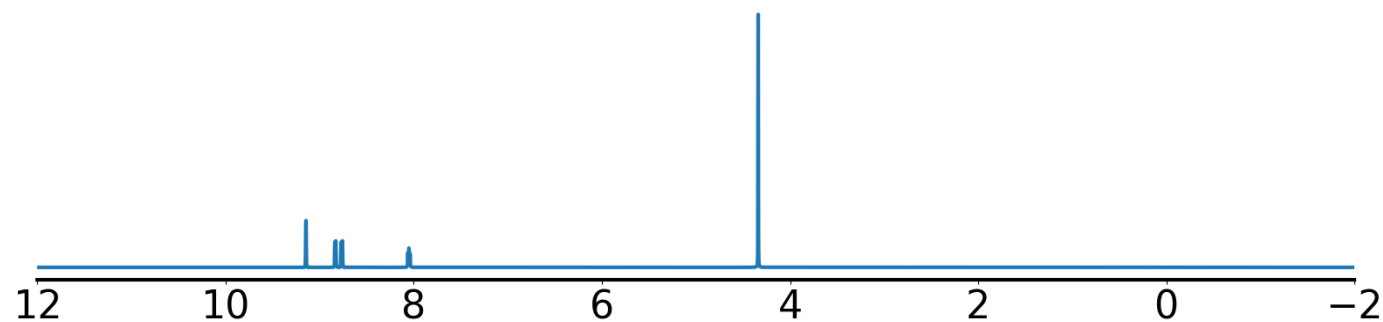

Top predicted structures (loss):

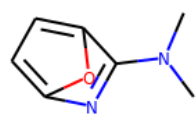

0.038564

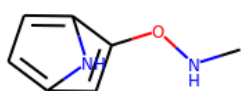

0.039903

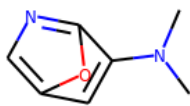

0.040848

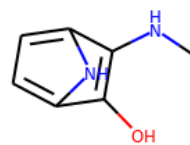

0.041371

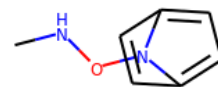

0.041471

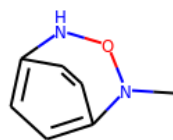

0.04191

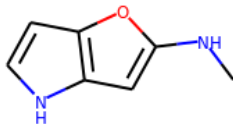

0.044615

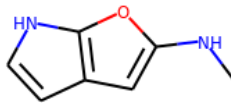

0.04582

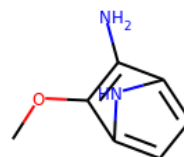

0.046694

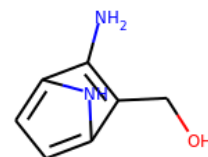

0.046896

|                             |        |                                           |        |
|-----------------------------|--------|-------------------------------------------|--------|
| Top predicted substructures | prob   |                                           |        |
| [#6X3][#6X3]                | 0.9993 | [#6X3][#6X3][#6X3][#6X3]                  | 0.8868 |
| [#6H1]                      | 0.9993 | [cH]                                      | 0.8516 |
| [#6X3H1][#6X3H0]            | 0.9883 | [#6X3][#7][#6X3]                          | 0.8217 |
| [#7][#6][#6X3]              | 0.9696 | [#7][#6X3H0][#6X3H1]                      | 0.6519 |
| [#7][#6][#6][#6X3]          | 0.894  | [cH][cH]                                  | 0.6439 |
| best positives              | prob   | best negatives                            | prob   |
| [#6X3][#6X3]                | 0.9993 | [OX2H0]1[OX4H2][OX4H2][OX4H1][OX4H1]1     | 0.0    |
| [#6H1]                      | 0.9993 | [OX1H0]=[CX3H0]1[CX4H1][CX4H1][CX4H2]1    | 0.0    |
| [#6X3H1][#6X3H0]            | 0.9883 | [#8][#6H1][#6H2][#6H1]=[#8]               | 0.0    |
| [#7][#6][#6X3]              | 0.9696 | [OX2H1][CX4H1][CX4H1]([CX4H1])[CX4H1]     | 0.0    |
| [#7][#6][#6][#6X3]          | 0.894  | [CX4H0]([OX2H1])([CX4H3])([CX4H2])[CX4H1] | 0.0    |
| [#6X3][#6X3][#6X3][#6X3]    | 0.8868 | [CX4H0]([OX2H0])([CX4H3])([CX4H2])[CX4H1] | 0.0    |
| [cH]                        | 0.8516 | [OX2H0][CX4H2][CX4H1]([CX4H1])[CX4H1]     | 0.0    |
| [#6X3][#7][#6X3]            | 0.8217 | [CX4H1]([OX2H0])([CX4H3])[CX4H0]          | 0.0    |
| [cH][cH]                    | 0.6439 | [#6]1[#8][#6][#6]1=[#8]                   | 0.0    |
| [cX3H1]([cX3H1])[cX3H0]     | 0.6405 | [OX2H0]1[OX4H2][CX4H1]1[OX4H1]            | 0.0    |
| worst negatives             | prob   | worst positives                           | prob   |
| [#7][#6X3H0][#6X3H1]        | 0.6519 | [CX4H3][NX3H1]                            | 0.1382 |
| [#7][#6H0][#6H1]            | 0.5931 | [#6H1][#7][#6H1]                          | 0.1653 |
| [#8][#6][#6][#6X3]          | 0.5206 | [#7X3H1]                                  | 0.208  |
| [OX2H1]                     | 0.4645 | O=[#6][#6][#6X3]                          | 0.2701 |
| [#8][#6H0][#6H1]            | 0.3266 | [#6H3][#7]                                | 0.2975 |
| [#7X3H2]                    | 0.3261 | [cX3H1]([cX3H1])[cX3H1]                   | 0.316  |
| [#6X3][#6][#6][#6H3]        | 0.244  | [cX3H1]([nX2H0])[cX3H1]                   | 0.3174 |
| [#7H2][#6H0]                | 0.2241 | [#7][#6][#6][#6][#7]                      | 0.3245 |
| [#7][#6][#7]                | 0.2103 | [#6X3H1][#6X3H1][#6X3H0][#6X3H1]          | 0.3677 |
| [cH]cO                      | 0.207  | [CX4H3]                                   | 0.4011 |

---

Example 3 true smiles: NC(=O)CCC(N)C(=O)O formula: C5H10N2O3  
 Index of correct structure: 3 of 371534  
 True structure loss: 0.024882  
 True structure:

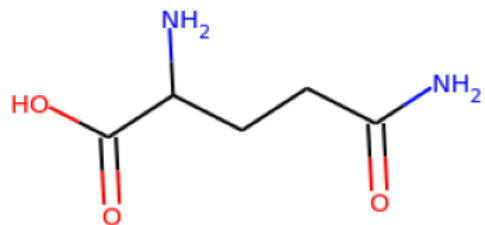

Experimental <sup>13</sup>C NMR (solvent: D2O)

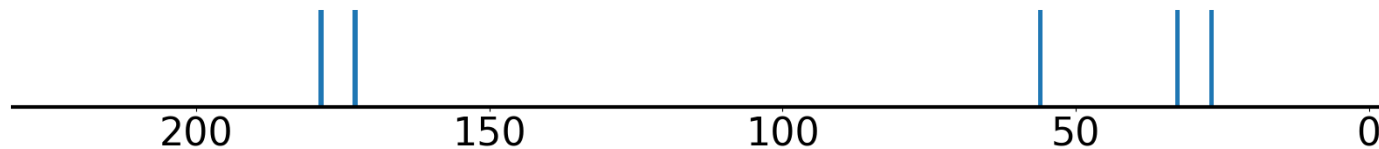

Experimental <sup>1</sup>H NMR (solvent: D2O)

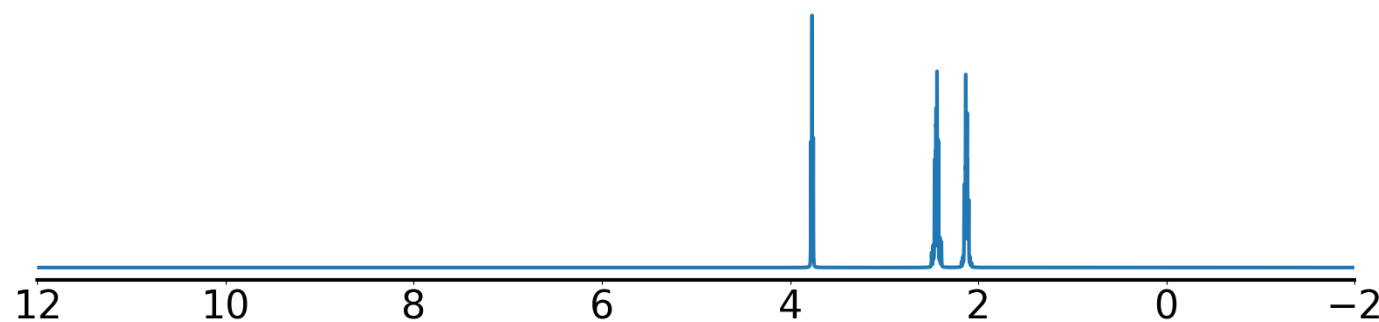

Top predicted structures (loss):

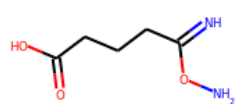

0.020751

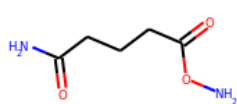

0.022857

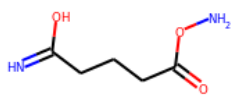

0.023199

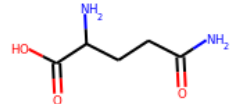

0.024882

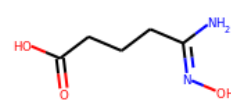

0.025053

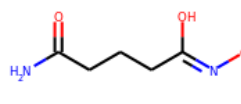

0.025267

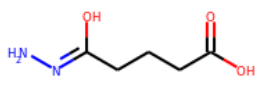

0.02767

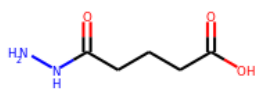

0.028047

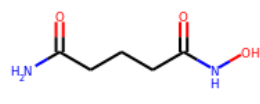

0.028804

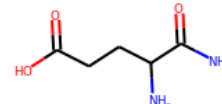

0.029394



|                                   |        |                                   |        |
|-----------------------------------|--------|-----------------------------------|--------|
| Top predicted substructures       | prob   |                                   |        |
| [CX4H2]([#6])[#6]                 | 1.0    | O=[CX3H0][CX4H2][CX4H2]           | 0.9637 |
| [CX3](=[OX1])C                    | 0.9966 | [CX3](=[OX1])O                    | 0.9542 |
| [#7X3H2]                          | 0.9756 | [CX4H1]([NX3H2])([CX4H2])[CX3H0]  | 0.8848 |
| [#8]=[#6][#8]                     | 0.9745 | [CX4H2][CX4H2]                    | 0.882  |
| [CX4H2]([CX4H2])[CX3H0]           | 0.9706 | [CX4H2]CC=O                       | 0.8812 |
| best positives                    | prob   | best negatives                    | prob   |
| [CX4H2]([#6])[#6]                 | 1.0    | [CX2H1]#[CX2H0][CX3H1]=[CX3H0]    | 0.0    |
| [CX3](=[OX1])C                    | 0.9966 | [CX2H0](#[CX2H0])[CX4H0]          | 0.0    |
| [#7X3H2]                          | 0.9756 | CC=CCC#C                          | 0.0    |
| [#8]=[#6][#8]                     | 0.9745 | [CX3H0](=[CX3H1])([CX4H2])[CX2H0] | 0.0    |
| [CX4H2]([CX4H2])[CX3H0]           | 0.9706 | CC#CCC#C                          | 0.0    |
| O=[CX3H0][CX4H2][CX4H2]           | 0.9637 | [#6X2][#6H1][#6X2]                | 0.0    |
| [CX3](=[OX1])O                    | 0.9542 | C=CC=CC#C                         | 0.0    |
| [CX4H1]([NX3H2])([CX4H2])[CX3H0]  | 0.8848 | [CX2H0](#[CX2H0])[CX2H0]          | 0.0    |
| [CX4H2][CX4H2]                    | 0.882  | [CX2H0](#[CX2H1])[CX4H1]          | 0.0    |
| [CX4H2]CC=O                       | 0.8812 | CC#CCC=C                          | 0.0    |
| worst negatives                   | prob   | worst positives                   | prob   |
| [OX1H0]=[CX3H0]([#8])[CX4H2]      | 0.7335 | [#7][#6][#6][#6][#7]              | 0.06   |
| [#8][#6][#6H2]                    | 0.5612 | [#8][#6H0][#6H1]                  | 0.0741 |
| [CX4H2]([CX4H2])[CX4H2]           | 0.3529 | O=[CX3][CX4H]                     | 0.2028 |
| [CX3H0](=[OX1H0])([NX3H1])[CX4H2] | 0.3079 | [CX3H0](=[OX1H0])([OX2H1])[CX4H1] | 0.2269 |
| [#7X3H1]                          | 0.3015 | [#6H1][#6H2][#6][#6][#7]          | 0.2545 |
| [CX3H0](=[OX1H0])([OX2H1])[CX4H2] | 0.2988 | [#6H1]                            | 0.2758 |
| [OX2H0][CX3H0][CX4H2]             | 0.1659 | [#6H1][#6H2]                      | 0.3254 |
| [#7][#6H2][#6H2]                  | 0.1615 | [CX4H2]([CX4H2])[CX4H1]           | 0.3759 |
| [#6]=[#7H]                        | 0.1517 | [#8]=[#6H0][#6H1]                 | 0.3908 |
| [CX3H0](=[OX1H0])([OX2H0])[CX4H2] | 0.118  | [#7H2][#6H0]                      | 0.59   |

---

Example 4 true smiles: NC(=O)CCC(N)C(=O)O formula: C5H10N2O3  
 Index of correct structure: -1 of 371534  
 True structure loss: 0.020849  
 True structure:

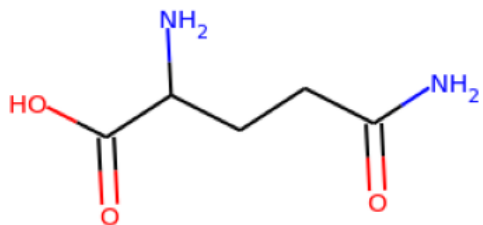

Experimental <sup>13</sup>C NMR (solvent: N/A)

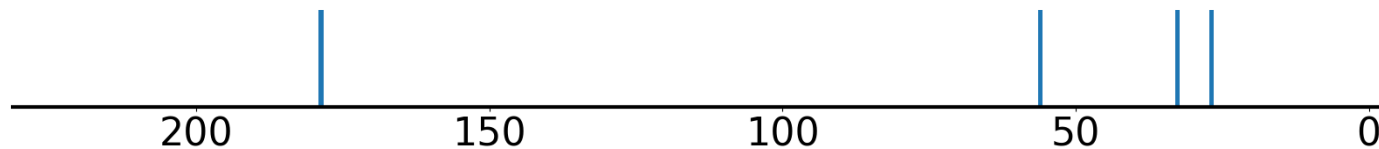

Experimental <sup>1</sup>H NMR (solvent: D2O)

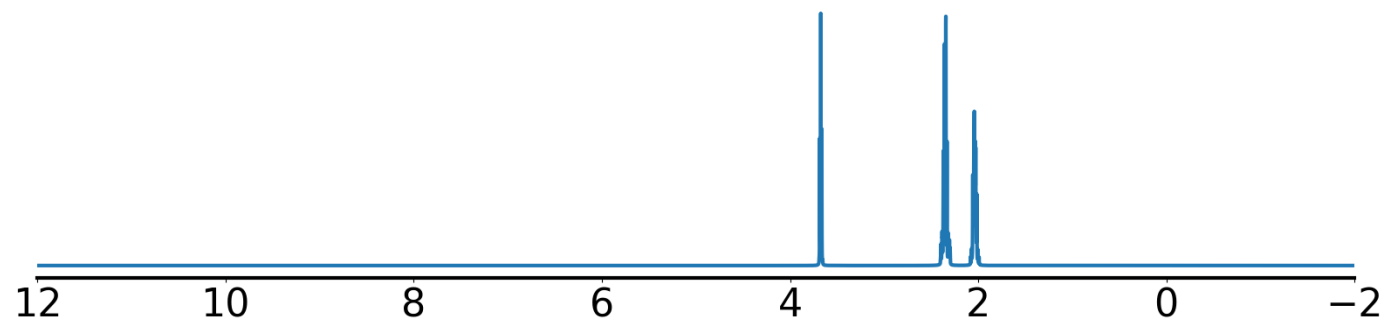

Top predicted structures (loss):

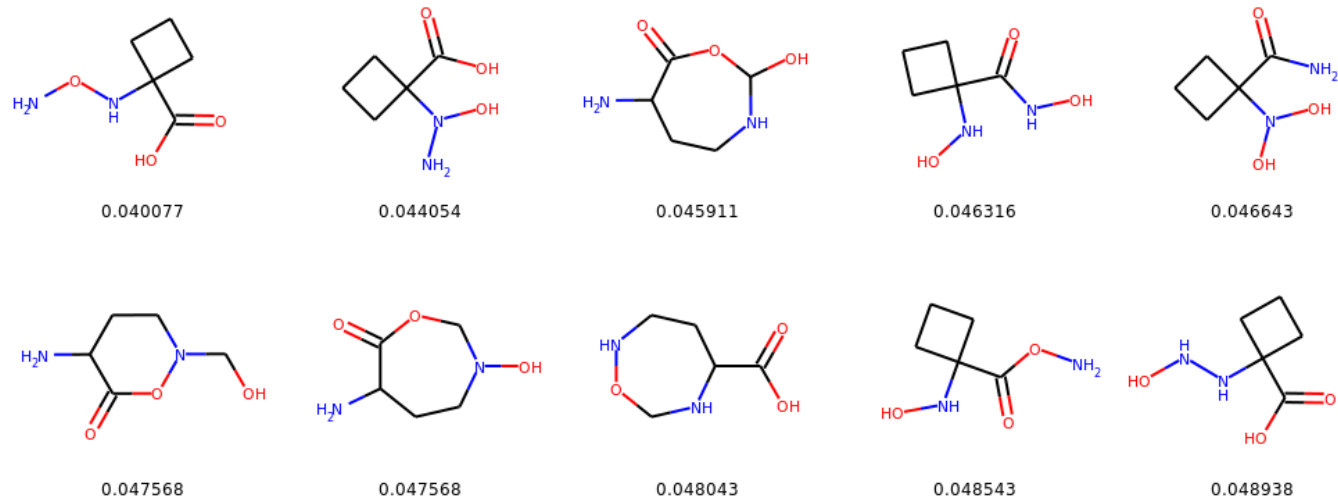

|                                  |        |                                   |        |
|----------------------------------|--------|-----------------------------------|--------|
| Top predicted substructures      | prob   |                                   |        |
| [CX4H2]([#6])[#6]                | 0.9992 | [#7X3H2]                          | 0.8733 |
| [CX3](=[OX1])C                   | 0.9823 | [#8]=[#6][#8]                     | 0.8292 |
| [OX2H1]                          | 0.9796 | [#7][#6][#6X3]                    | 0.8207 |
| [CX4H2][CX4H2]                   | 0.8941 | [CX4H2]CC=O                       | 0.8164 |
| [#7H2][#6H1]                     | 0.8829 | OCC[CH2]                          | 0.7604 |
| best positives                   | prob   | best negatives                    | prob   |
| [CX4H2]([#6])[#6]                | 0.9992 | [CX2H1]#[CX2H0][CX3H1]=[CX3H0]    | 0.0    |
| [CX3](=[OX1])C                   | 0.9823 | CC=CC#C                           | 0.0    |
| [OX2H1]                          | 0.9796 | CCC=CC#C                          | 0.0    |
| [CX4H2][CX4H2]                   | 0.8941 | C=CC=CC#C                         | 0.0    |
| [#7H2][#6H1]                     | 0.8829 | CC=CC#CC                          | 0.0    |
| [#7X3H2]                         | 0.8733 | CC#CCC=C                          | 0.0    |
| [#8]=[#6][#8]                    | 0.8292 | [CX3H1](=[CX3H1])[CX2H0]          | 0.0    |
| [#7][#6][#6X3]                   | 0.8207 | C=CCCC#C                          | 0.0    |
| [CX4H2]CC=O                      | 0.8164 | CCC#CC=C                          | 0.0    |
| OCC[CH2]                         | 0.7604 | [CX3H0](=[CX3H1])([OX2H0])[CX2H0] | 0.0    |
| worst negatives                  | prob   | worst positives                   | prob   |
| [#7X3H1]                         | 0.4857 | [#7H2][#6H0]                      | 0.1693 |
| [#7][#6][#6][#7]                 | 0.3365 | [#8][#6H0][#6H1]                  | 0.2032 |
| [#7X3H0]                         | 0.3296 | [CX3H0](=[OX1H0])([OX2H1])[CX4H1] | 0.2892 |
| [#8][#6][#6H2]                   | 0.2799 | [#7][#6][#6][#6][#7]              | 0.4205 |
| [#6H1][#6H1]                     | 0.2698 | [CX3](=O)[OX2H1]                  | 0.451  |
| [#7][#6][#6][#6][#7]             | 0.258  | [#8]=[#6H0][#6H1]                 | 0.5107 |
| [OH][CX4H]                       | 0.2145 | O=[CX3][CX4H]                     | 0.5163 |
| [CX4H1]([OX2H1])([CX4H1])[CX4H1] | 0.1968 | [CX4H2][CX3]=O                    | 0.5288 |
| [CX4H2]([CX4H2])[CX4H2]          | 0.1663 | [#6H1]                            | 0.6315 |
| [#7][#6H2]                       | 0.1604 | [CX4H2]([CX4H2])[CX4H1]           | 0.6329 |

---

Example 5 true smiles: O=c1[nH]cc(CO)c(=O)[nH]1 formula: C5H6N2O3  
 Index of correct structure: -1 of 354279  
 True structure loss: 0.035503  
 True structure:

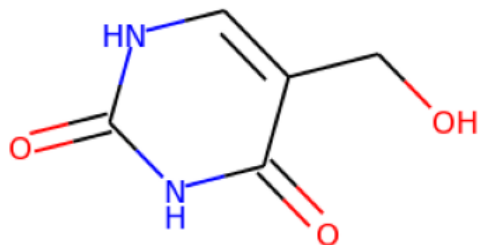

Experimental <sup>13</sup>C NMR (solvent: DMSO-d6)

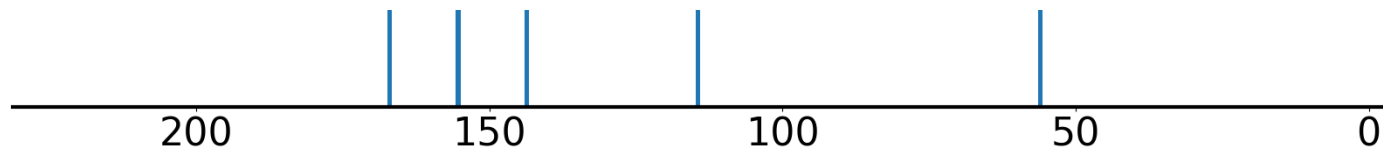

Experimental <sup>1</sup>H NMR (solvent: D2O)

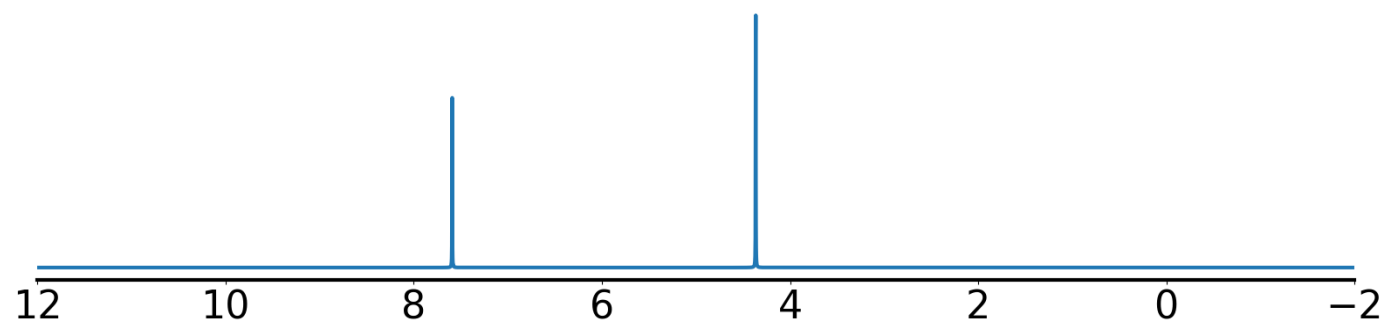

Top predicted structures (loss):

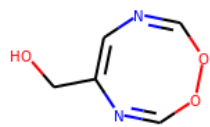

0.038209

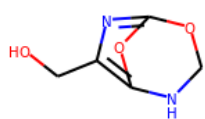

0.039649

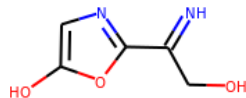

0.039969

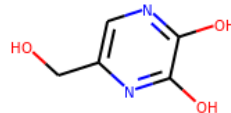

0.040077

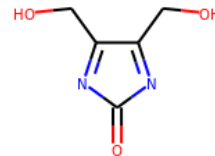

0.041477

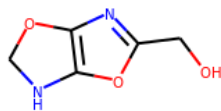

0.042268

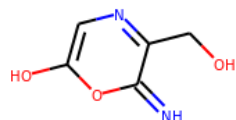

0.042466

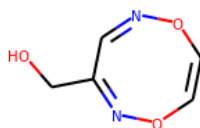

0.043108

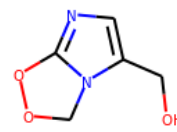

0.044141

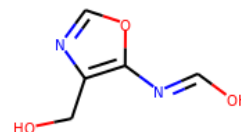

0.044431

|                             |        |                                              |        |
|-----------------------------|--------|----------------------------------------------|--------|
| Top predicted substructures | prob   |                                              |        |
| [#6H1]                      | 0.9707 | [CX4H2]([#6])[O]                             | 0.82   |
| [#6X3][#6X3]                | 0.9662 | [OX2H1]                                      | 0.8045 |
| [#7][#6][#6X3]              | 0.8608 | [cH]                                         | 0.7152 |
| [OX2H1][CX4H2][#6X3H0]      | 0.8345 | [#6X3][#6H2][#8]                             | 0.6931 |
| [#6X3H1][#6X3H0]            | 0.8231 | [#8][#6][#6][#6X3]                           | 0.6841 |
| best positives              | prob   | best negatives                               | prob   |
| [#6H1]                      | 0.9707 | [CX4H1]([CX4H3])([CX4H2])[CX4H0]             | 0.0    |
| [#6X3][#6X3]                | 0.9662 | [OX2H0][CX4H1][CX4H1]([CX4H2][CX4H1])[CX4H1] | 0.0    |
| [#7][#6][#6X3]              | 0.8608 | [CX4H0]1[CX4H2][CX4H2][CX4H1]1               | 0.0    |
| [OX2H1][CX4H2][#6X3H0]      | 0.8345 | CCC#CC#C                                     | 0.0    |
| [#6X3H1][#6X3H0]            | 0.8231 | CC#CCC#C                                     | 0.0    |
| [CX4H2]([#6])[O]            | 0.82   | [CX4H0]([CX4H3])([CX4H2])([CX4H1])[CX4H1]    | 0.0    |
| [OX2H1]                     | 0.8045 | [CX4H0]([CX4H3])([CX4H2])([CX4H2])[CX3H0]    | 0.0    |
| [cH]                        | 0.7152 | [OX2H1][CX4H1]1[CX4H1][CX4H2][CX4H1]1        | 0.0    |
| [#6X3][#6H2][#8]            | 0.6931 | [CX2H0](#[CX2H0])[CX2H0]                     | 0.0    |
| [#8][#6][#6][#6X3]          | 0.6841 | [CX4H2]([CX4H0])[CX2H0]                      | 0.0    |
| worst negatives             | prob   | worst positives                              | prob   |
| [CX3](=[OX1])O              | 0.6236 | [#7][#6H0][#7]                               | 0.0932 |
| [#8]=[#6][#8]               | 0.61   | [cX3H1]([nX3H1])[cX3H0]                      | 0.1081 |
| [#8][#6H0][#6H1]            | 0.3938 | [cX3H0]([cX3H1])([cX3H0])[CX4H2]             | 0.1192 |
| [#8][#6][#6]=[#6X3]         | 0.3719 | [#7][#6][#6][#6][#7]                         | 0.1998 |
| [CX3](=[OX1])C              | 0.3667 | [#7H][#6X3H1]                                | 0.201  |
| [#7X3H2]                    | 0.3287 | [#7][#6][#7]                                 | 0.2328 |
| [#6H1r5][#7]                | 0.2875 | O=[cX3]                                      | 0.2369 |
| [#7]=[#6][#6X3]             | 0.2841 | [#6X3][#7X3][#6X3]                           | 0.286  |
| [#7][#6X3H0][#6X3H1]        | 0.2766 | O=[#6][#6][#6X3]                             | 0.3261 |
| [#6X3H1]=[#6X3H0]           | 0.2739 | [#7X3H1]                                     | 0.4011 |

---

Example 6 true smiles: NCCc1ccc(O)cc1 formula: C8H11NO  
Index of correct structure: 0 of 193269  
True structure loss: 0.024764  
True structure:

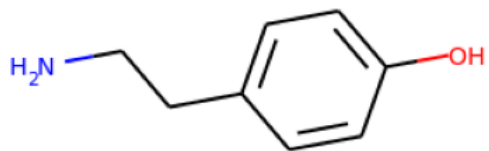

Experimental <sup>13</sup>C NMR (solvent: CD3OD)

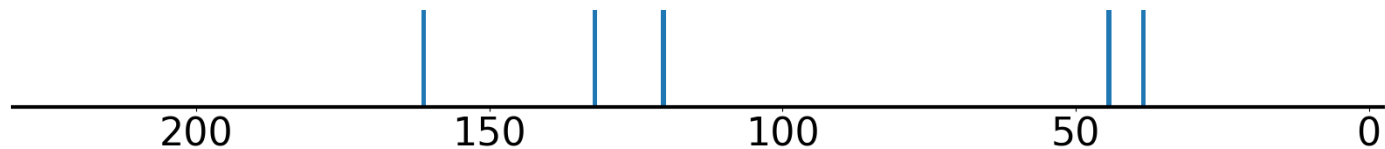

Experimental <sup>1</sup>H NMR (solvent: D2O)

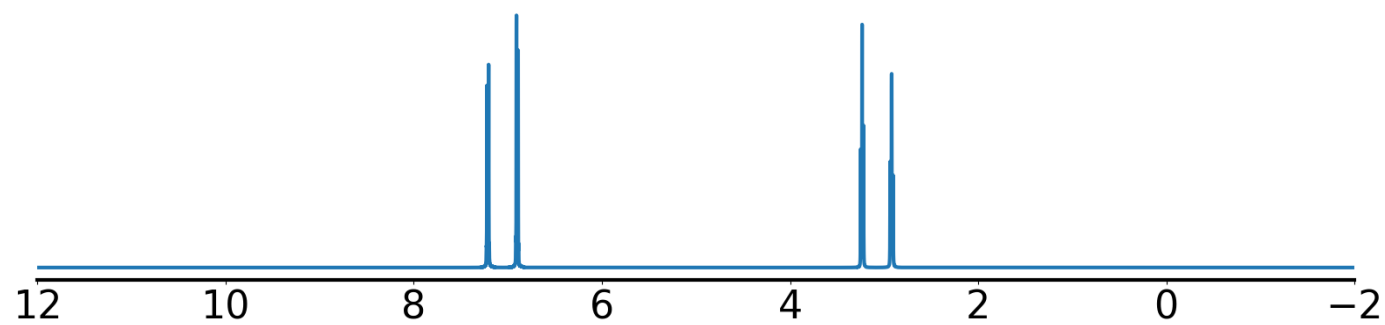

Top predicted structures (loss):

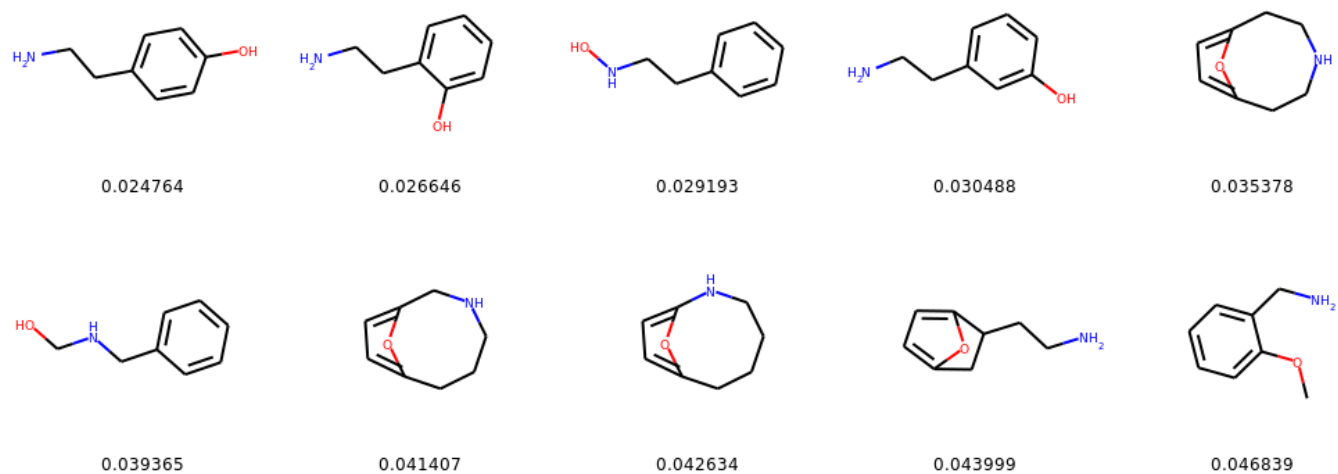

| Top predicted substructures      | prob   |                                           |        |
|----------------------------------|--------|-------------------------------------------|--------|
| [#6H1]                           | 0.9993 | [CX4H2]([CX4H2])[cX3H0]                   | 0.9351 |
| [CX4H2]([#6])[#6]                | 0.9958 | [#7][#6][#6X3]                            | 0.8705 |
| [cH][cH]                         | 0.9816 | [#6H1][#6H1]                              | 0.8443 |
| [#6X3][#6X3][#6X3][#6X3]         | 0.9614 | [CX4H2]([NX3H2])[CX4H2]                   | 0.8428 |
| [#6X3][#6X3]                     | 0.9439 | [cH]                                      | 0.8401 |
| best positives                   | prob   | best negatives                            | prob   |
| [#6H1]                           | 0.9993 | [CX4H0]([CX4H3])([CX4H2])([CX4H2])[CX3H0] | 0.0    |
| [CX4H2]([#6])[#6]                | 0.9958 | [CX4H0]([OX2H1])([CX4H3])([CX4H2])[CX4H1] | 0.0    |
| [cH][cH]                         | 0.9816 | [CX3H0](=[OX1H0])([CX4H3])[CX4H0]         | 0.0    |
| [#6X3][#6X3][#6X3][#6X3]         | 0.9614 | [OX2H0]1[CX4H0][CX4H1]1                   | 0.0    |
| [#6X3][#6X3]                     | 0.9439 | CC#CCC#C                                  | 0.0    |
| [CX4H2]([CX4H2])[cX3H0]          | 0.9351 | [CX3H0](=[CX3H2])([CX4H3])[CX4H0]         | 0.0    |
| [#6H1][#6H1]                     | 0.8443 | [CX4H0]([NX3H1])([CX4H3])([CX4H2])[CX4H1] | 0.0    |
| [CX4H2]([NX3H2])[CX4H2]          | 0.8428 | [CX4H1]([OX2H0])([CX4H3])[CX4H0]          | 0.0    |
| [cH]                             | 0.8401 | [OX2H0][CX4H2][CX3H0][CX4H3]              | 0.0    |
| [cX3H1]([cX3H1])[cX3H0]          | 0.8379 | [CX3H2]=[CX3H1][CX4H0][OX2H1]             | 0.0    |
| worst negatives                  | prob   | worst positives                           | prob   |
| [#7][#6][#6X3]                   | 0.8705 | [cX3H0][cX3H1][cX3H1][cX3H0]              | 0.1148 |
| [#6H1][#6H2]                     | 0.6122 | [#6X3H1][#6X3H1][#6X3H0][#6X3H1]          | 0.141  |
| [cX3H1]([cX3H1])[cX3H1]          | 0.5428 | [cH]cO                                    | 0.2988 |
| [CX4H2][CX3H]                    | 0.4241 | [OX2H1]                                   | 0.3204 |
| [#6X3][#7][#6X3]                 | 0.3728 | [CX4H2][CX4H2]                            | 0.3796 |
| [#6]1[#6][#6][#6][#6][#7]1       | 0.2982 | [OX2H][cX3]:[c]                           | 0.3968 |
| [#7X3H1]                         | 0.2617 | [#6]1[#6][#6][#6][#6][#6]1                | 0.427  |
| [#7][#6H0][#6H1]                 | 0.2514 | [#8][#6H0][#6H1]                          | 0.4371 |
| [#6H2][#7][#6X3]                 | 0.2111 | [#8][#6][#6][#6X3]                        | 0.4734 |
| [cX3H0]([cX3H1])([cX3H0])[CX4H2] | 0.1989 | [#7][#6H2][#6H2]                          | 0.5587 |

---

Example 7 true smiles: NCCCC(N)C(=O)O formula: C6H14N2O2  
Index of correct structure: 0 of 143634  
True structure loss: 0.021445  
True structure:

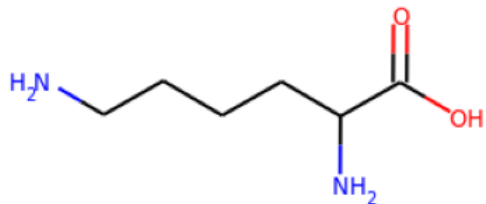

Experimental <sup>13</sup>C NMR (solvent: D2O)

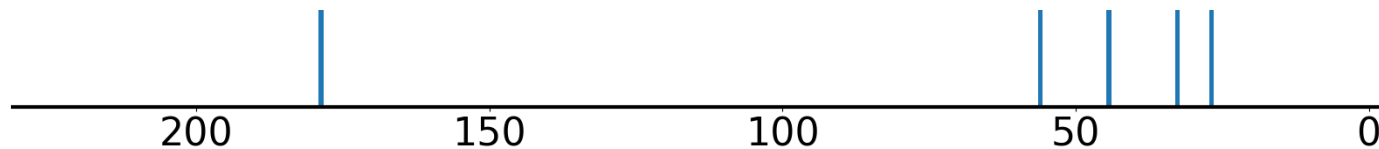

Experimental <sup>1</sup>H NMR (solvent: D2O)

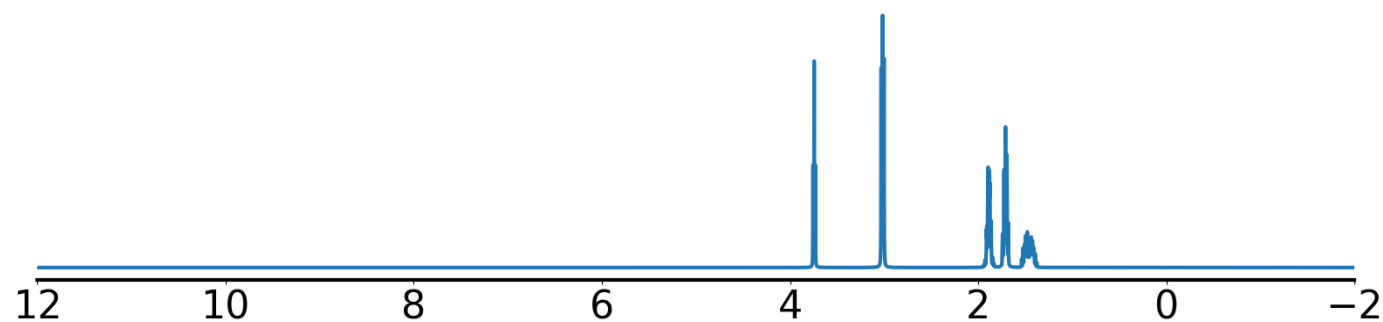

Top predicted structures (loss):

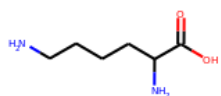

0.021445

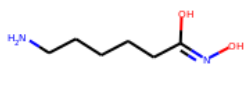

0.032197

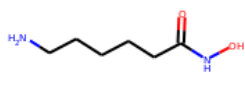

0.033694

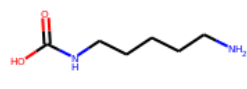

0.034373

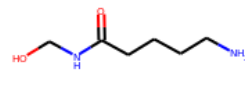

0.034638

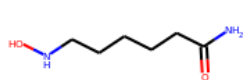

0.034681

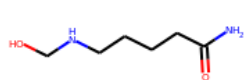

0.036561

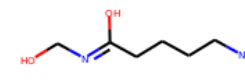

0.03884

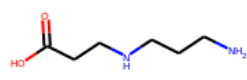

0.040982

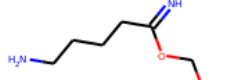

0.041044



|                             |        |                                   |        |
|-----------------------------|--------|-----------------------------------|--------|
| Top predicted substructures | prob   |                                   |        |
| [CX4H2]([#6])[#6]           | 1.0    | [CX4H2]([CX4H2])[CX4H2]           | 0.9238 |
| [#7X3H2]                    | 0.9909 | OCC[CH2]                          | 0.9076 |
| [OX2H1]                     | 0.9893 | [CX4H2]CC=O                       | 0.8824 |
| [CX4H2][CX4H2]              | 0.968  | [CX4H2]([CX4H2])[CX4H1]           | 0.8577 |
| [CX3](=[OX1])C              | 0.9354 | [#7][#6H2][#6H2]                  | 0.8489 |
| best positives              | prob   | best negatives                    | prob   |
| [CX4H2]([#6])[#6]           | 1.0    | [CX2H1]#[CX2H0][CX3H1]=[CX3H0]    | 0.0    |
| [#7X3H2]                    | 0.9909 | [CX2H0]([#CX2H1])[CX3H0]          | 0.0    |
| [OX2H1]                     | 0.9893 | [CX2H0]([#CX2H1])[CX4H2]          | 0.0    |
| [CX4H2][CX4H2]              | 0.968  | [CX3H0](=[CX3H1])([CX4H2])[CX2H0] | 0.0    |
| [CX3](=[OX1])C              | 0.9354 | CCC=CC#C                          | 0.0    |
| [CX4H2]([CX4H2])[CX4H2]     | 0.9238 | CCC#CC#C                          | 0.0    |
| OCC[CH2]                    | 0.9076 | C=CCCC#C                          | 0.0    |
| [CX4H2]CC=O                 | 0.8824 | CC#CCC=C                          | 0.0    |
| [CX4H2]([CX4H2])[CX4H1]     | 0.8577 | CC=CC#CC                          | 0.0    |
| [#7][#6H2][#6H2]            | 0.8489 | [CX2H0]([#CX2H0])[CX2H0]          | 0.0    |
| worst negatives             | prob   | worst positives                   | prob   |
| [#8][#6][#6H2]              | 0.569  | CCCCC                             | 0.069  |
| [#7H2][#6H0]                | 0.5649 | [#8][#6H0][#6H1]                  | 0.1173 |
| [CX4H2][CX3]=O              | 0.5159 | [CX3H0](=[OX1H0])([OX2H1])[CX4H1] | 0.2924 |
| O=[CX3H0][CX4H2][CX4H2]     | 0.451  | [#6H1][#6H2]                      | 0.4028 |
| [CX4H2]([OX2H1])[CX4H2]     | 0.3368 | [#6H1]                            | 0.4525 |
| [#7X3H1]                    | 0.275  | [CX3](=[OX1])O                    | 0.479  |
| [#7][#6][#6][#6][#6][#7]    | 0.2494 | [#7][#6][#6X3]                    | 0.4943 |
| [CX4H2]([NX3H1])[CX4H2]     | 0.2047 | [#8]=[#6][#8]                     | 0.57   |
| [#6H1][#6H2][#6][#6][#7]    | 0.1833 | [CX4H1]([NX3H2])([CX4H2])[CX3H0]  | 0.6514 |
| [#7][#6][#6][#7]            | 0.143  | [#8]=[#6H0][#6H1]                 | 0.6631 |

---

Example 8 true smiles: NCCCC(N)C(=O)O formula: C6H14N2O2  
 Index of correct structure: 0 of 143634  
 True structure loss: 0.021405  
 True structure:



Experimental <sup>13</sup>C NMR (solvent: D2O)



Experimental <sup>1</sup>H NMR (solvent: D2O)

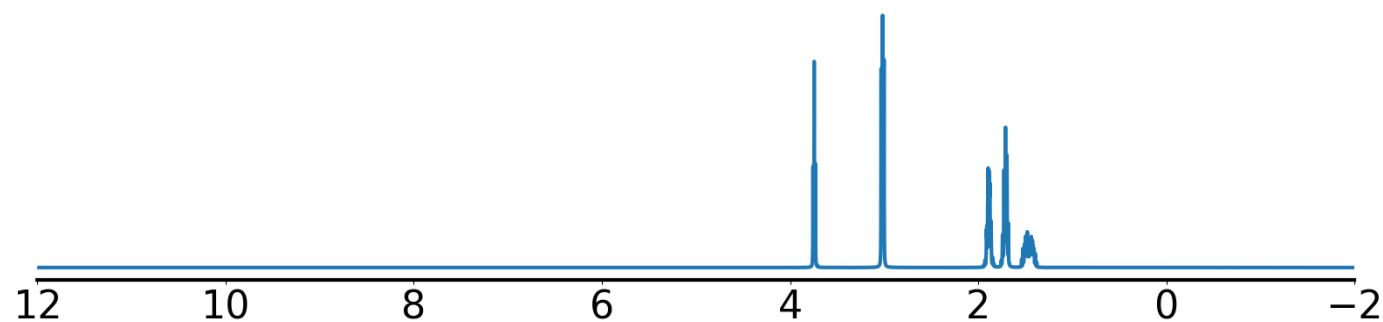

Top predicted structures (loss):



0.021405



0.03232

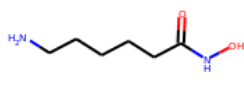

0.033761

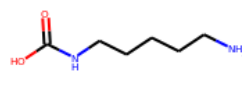

0.034453

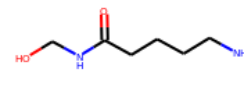

0.034698



0.03472



0.036615

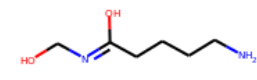

0.038955

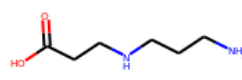

0.041103

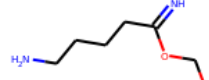

0.04116

|                             |        |                                  |        |
|-----------------------------|--------|----------------------------------|--------|
| Top predicted substructures | prob   |                                  |        |
| [CX4H2]([#6])[#6]           | 1.0    | [CX4H2]([CX4H2])[CX4H2]          | 0.9238 |
| [#7X3H2]                    | 0.9903 | OCC[CH2]                         | 0.9076 |
| [OX2H1]                     | 0.9892 | [CX4H2]CC=O                      | 0.8846 |
| [CX4H2][CX4H2]              | 0.9679 | [CX4H2]([CX4H2])[CX4H1]          | 0.8567 |
| [CX3](=[OX1])C              | 0.9363 | [#7][#6H2][#6H2]                 | 0.8521 |
| best positives              | prob   | best negatives                   | prob   |
| [CX4H2]([#6])[#6]           | 1.0    | [CX2H1]#[CX2H0][CX3H1]=[CX3H0]   | 0.0    |
| [#7X3H2]                    | 0.9903 | [CX2H0]([CX2H1])[CX3H0]          | 0.0    |
| [OX2H1]                     | 0.9892 | [CX2H0]([CX2H1])[CX4H2]          | 0.0    |
| [CX4H2][CX4H2]              | 0.9679 | [CX3H0]([CX3H1])([CX4H2])[CX2H0] | 0.0    |
| [CX3](=[OX1])C              | 0.9363 | CCC=CC#C                         | 0.0    |
| [CX4H2]([CX4H2])[CX4H2]     | 0.9238 | CCC#CC#C                         | 0.0    |
| OCC[CH2]                    | 0.9076 | C=CCCC#C                         | 0.0    |
| [CX4H2]CC=O                 | 0.8846 | CC=CC#CC                         | 0.0    |
| [CX4H2]([CX4H2])[CX4H1]     | 0.8567 | CC#CCC=C                         | 0.0    |
| [#7][#6H2][#6H2]            | 0.8521 | [CX2H0]([CX2H0])[CX2H0]          | 0.0    |
| worst negatives             | prob   | worst positives                  | prob   |
| [#8][#6][#6H2]              | 0.5669 | CCCCC                            | 0.0696 |
| [#7H2][#6H0]                | 0.5601 | [#8][#6H0][#6H1]                 | 0.1181 |
| [CX4H2][CX3]=O              | 0.5139 | [CX3H0]([OX1H0])([OX2H1])[CX4H1] | 0.2946 |
| O=[CX3H0][CX4H2][CX4H2]     | 0.4554 | [#6H1][#6H2]                     | 0.4037 |
| [CX4H2]([OX2H1])[CX4H2]     | 0.3334 | [#6H1]                           | 0.4478 |
| [#7X3H1]                    | 0.2746 | [CX3]([OX1])O                    | 0.4781 |
| [#7][#6][#6][#6][#6][#7]    | 0.2487 | [#7][#6][#6X3]                   | 0.4964 |
| [CX4H2]([NX3H1])[CX4H2]     | 0.2068 | [#8]=[#6][#8]                    | 0.5679 |
| [#6H1][#6H2][#6][#6][#7]    | 0.1832 | [CX4H1]([NX3H2])([CX4H2])[CX3H0] | 0.6545 |
| [#7][#6][#6][#7]            | 0.1446 | [#8]=[#6H0][#6H1]                | 0.6676 |

---

Example 9 true smiles: Nc1cccc(C(=O)O)c1 formula: C7H7NO2  
 Index of correct structure: 4 of 141060  
 True structure loss: 0.027383  
 True structure:

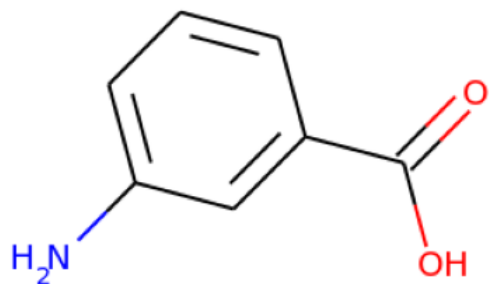

Experimental <sup>13</sup>C NMR (solvent: D2O)

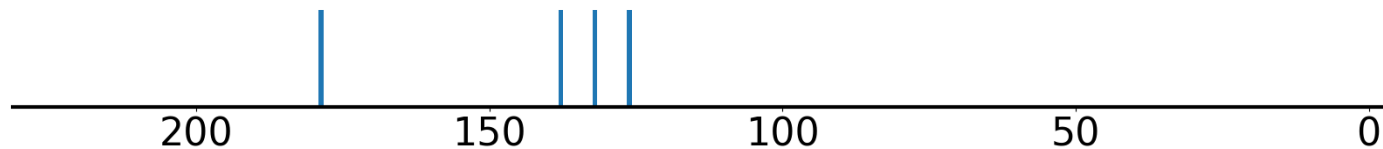

Experimental <sup>1</sup>H NMR (solvent: D2O)

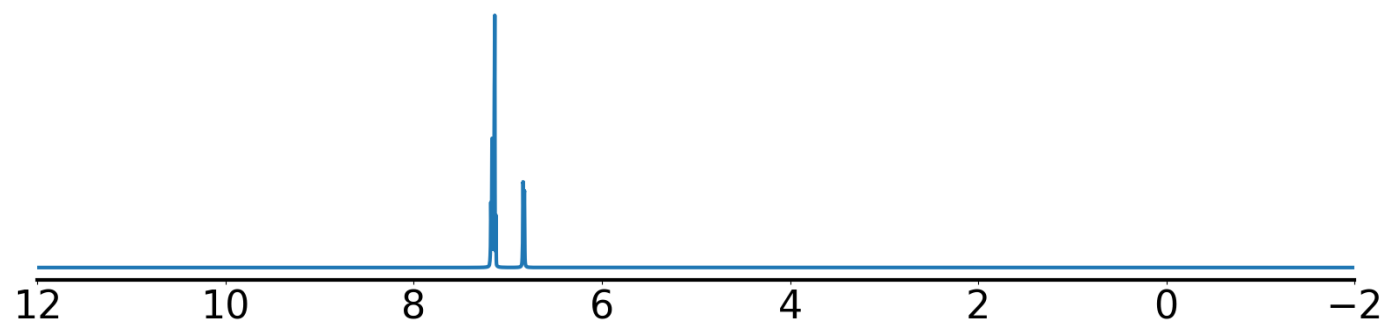

Top predicted structures (loss):

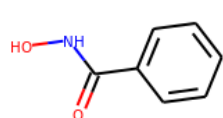

0.020355

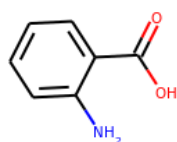

0.023262

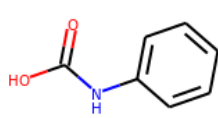

0.023546

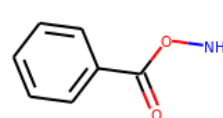

0.027078

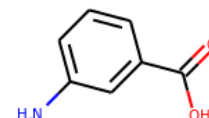

0.027383

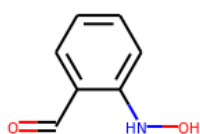

0.028523

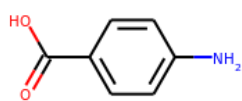

0.029103

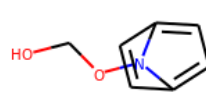

0.029256

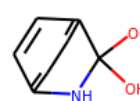

0.029341

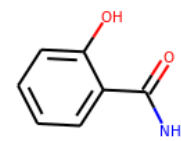

0.02951

|                             |        |                                           |        |
|-----------------------------|--------|-------------------------------------------|--------|
| Top predicted substructures | prob   |                                           |        |
| [#6X3][#6X3]                | 0.9953 | [#6X3][#6X3][#6X3][#6X3]                  | 0.8839 |
| [#6H1]                      | 0.9934 | O=[#6][#6][#6X3]                          | 0.8684 |
| [cH][cH]                    | 0.9704 | [#6H1][#6H1]                              | 0.8621 |
| [#7][#6][#6X3]              | 0.9217 | [cX3H1]([cX3H1])[cX3H0]                   | 0.8292 |
| [#6X3H1][#6X3H0]            | 0.9036 | [cX3H1]([cX3H1])[cX3H1]                   | 0.784  |
| best positives              | prob   | best negatives                            | prob   |
| [#6X3][#6X3]                | 0.9953 | [OX2H0][CX4H2][CX4H1]([CX4H2])[CX4H1]     | 0.0    |
| [#6H1]                      | 0.9934 | [OX2H0]1[CX4H2][CX4H2][CX4H1][CX4H1]1     | 0.0    |
| [cH][cH]                    | 0.9704 | [CX4H1]([OX2H1])([CX4H2])[CX2H0]          | 0.0    |
| [#7][#6][#6X3]              | 0.9217 | [OX2H0][CX4H2][CX4H2][CX4H1][OX2H0]       | 0.0    |
| [#6X3H1][#6X3H0]            | 0.9036 | [CX4H0]([CX4H3])([CX4H2])([CX4H2])[CX3H0] | 0.0    |
| [#6X3][#6X3][#6X3][#6X3]    | 0.8839 | [CX4H1]([CX4H3])([CX4H2])[CX4H0]          | 0.0    |
| O=[#6][#6][#6X3]            | 0.8684 | [CX4H0]([OX2H0])([CX4H3])([CX4H2])[CX4H2] | 0.0    |
| [#6H1][#6H1]                | 0.8621 | [CX4H0]([NX3H1])([CX4H3])([CX4H2])[CX4H1] | 0.0    |
| [cX3H1]([cX3H1])[cX3H0]     | 0.8292 | [OX2H0][CX4H2][CX4H1]([CX4H1])[CX4H3]     | 0.0    |
| [cX3H1]([cX3H1])[cX3H1]     | 0.784  | [CX4H0]([CX4H2])([CX4H2])([CX4H1])[CX4H1] | 0.0    |
| worst negatives             | prob   | worst positives                           | prob   |
| [#6X3][#7][#6X3]            | 0.6616 | [cX3H1]([cX3H0])[cX3H0]                   | 0.0297 |
| [CX3](=[OX1])C              | 0.5236 | [#7H2][#6H0]                              | 0.1932 |
| [#8]=[#6H0][#6H1]           | 0.5104 | [#7X3H2]                                  | 0.2562 |
| [#6X3][#7X3][#6X3]          | 0.4153 | [CX3](=[OX1])O                            | 0.2603 |
| O=[#6][#6][#6X3]            | 0.3436 | [#8][#6][#6][#6X3]                        | 0.2658 |
| [#8]=[#6][#6H1][#6H1]       | 0.3163 | [#8]=[#6][#8]                             | 0.3523 |
| [OX1H0]=[cX3H0][cX3H1]      | 0.2981 | [CX3](=O)[OX2H1]                          | 0.3685 |
| [#8]=[#6][#6H1]=[#6H1]      | 0.251  | [#6X3H1][#6X3H1][#6X3H0][#6X3H1]          | 0.3873 |
| O=[cX3]                     | 0.229  | [#6]1[#6][#6][#6][#6][#6]1                | 0.4473 |
| [#6H1r5][#7]                | 0.2272 | [#7][#6X3H0][#6X3H1]                      | 0.5636 |

---

Example 10 true smiles: O=C(O)Cc1ccccn1 formula: C7H7NO2  
Index of correct structure: -1 of 141060  
True structure loss: 0.050539  
True structure:

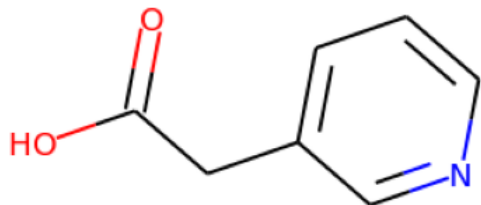

Experimental <sup>13</sup>C NMR (solvent: DMSO-d6)

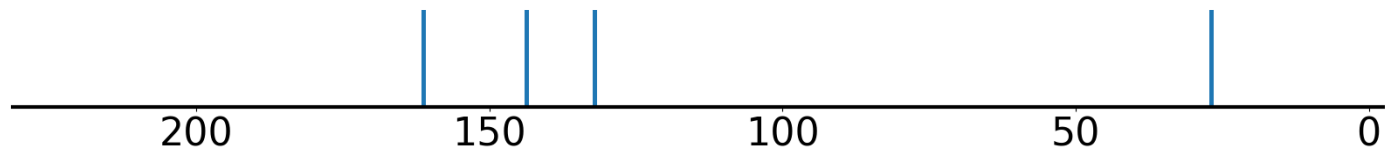

Experimental <sup>1</sup>H NMR (solvent: D2O)

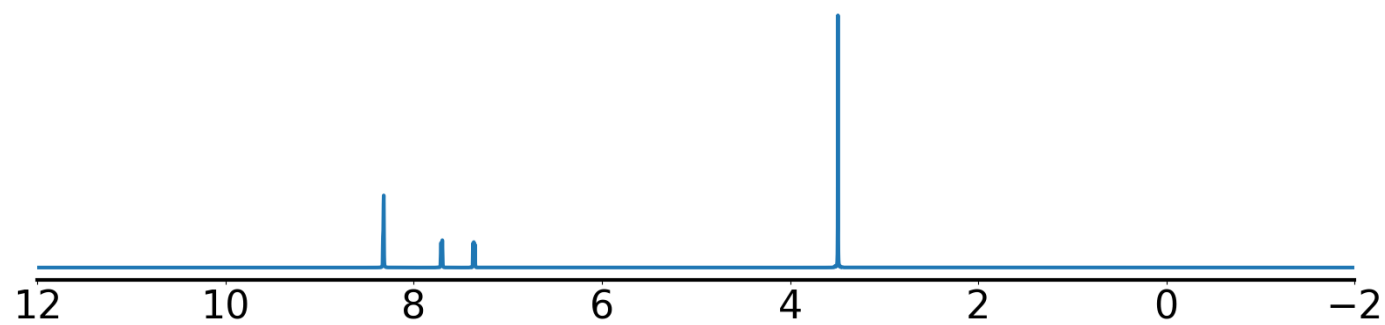

Top predicted structures (loss):

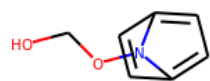

0.035522

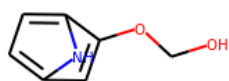

0.037206

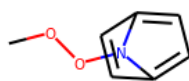

0.038745

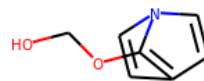

0.039656

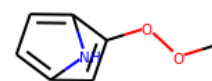

0.040429

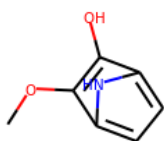

0.040517

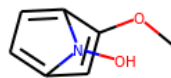

0.040547

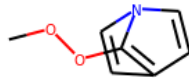

0.042879

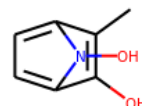

0.043882

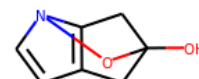

0.046072

|                             |        |                                        |        |
|-----------------------------|--------|----------------------------------------|--------|
| Top predicted substructures | prob   |                                        |        |
| [#6X3][#6X3]                | 0.9987 | [#7][#6][#6X3]                         | 0.9655 |
| [cH]                        | 0.9935 | [#6X3][#6X3][#6X3][#6X3]               | 0.9642 |
| [#6H1]                      | 0.9921 | [#7][#6][#6][#6X3]                     | 0.9103 |
| [#6X3H1][#6X3H0]            | 0.9772 | [cX3H1]([cX3H1])[cX3H0]                | 0.8783 |
| [cH][cH]                    | 0.9702 | [#8][#6][#6][#6X3]                     | 0.8771 |
| best positives              | prob   | best negatives                         | prob   |
| [#6X3][#6X3]                | 0.9987 | [OX2H0]1[OX4H2][CX4H2][CX4H1][CX4H1]1  | 0.0    |
| [cH]                        | 0.9935 | [#8][#6H1][#6H2][#6H1]=[#8]            | 0.0    |
| [#6H1]                      | 0.9921 | [OX2H0][CX4H2][CX4H2][CX4H1][OX2H0]    | 0.0    |
| [#6X3H1][#6X3H0]            | 0.9772 | [OX2H0]1[OX4H2][CX4H1][CX4H1]1         | 0.0    |
| [cH][cH]                    | 0.9702 | [OX2H0][CX4H2][CX4H1]([CX4H1])[CX4H1]  | 0.0    |
| [#7][#6][#6X3]              | 0.9655 | [CX4H1]([OX2H1])([CX4H2])[CX2H0]       | 0.0    |
| [#6X3][#6X3][#6X3][#6X3]    | 0.9642 | [OX1H0]=[CX3H0]1[OX4H1][CX4H1][CX4H2]1 | 0.0    |
| [#7][#6][#6][#6X3]          | 0.9103 | [CX4H1]([NX3H2])([CX4H2])[CX3H1]       | 0.0    |
| [cX3H1]([cX3H1])[cX3H0]     | 0.8783 | [OX2H1][CX4H0][CX4H2][CX4H0]           | 0.0    |
| [#8][#6][#6][#6X3]          | 0.8771 | [CX3H0]([OX1H0])([CX4H1])[CX4H0]       | 0.0    |
| worst negatives             | prob   | worst positives                        | prob   |
| [#8][#6H0][#6H1]            | 0.5451 | [CX4H2][CX3]=O                         | 0.0029 |
| [#7][#6H0][#6H1]            | 0.4829 | [OX1H0]=[CX3H0]([#8])[CX4H2]           | 0.0065 |
| [#6X3][#6][#6][#6H3]        | 0.4767 | [CX3H0]([OX1H0])([OX2H1])[CX4H2]       | 0.012  |
| [CX4H3]                     | 0.4473 | [#8X1]=[#6X3][#6H2][#6H0]              | 0.0414 |
| [#7][#6X3H0][#6X3H1]        | 0.4087 | [CX3]([OX1])C                          | 0.0485 |
| [#6H3][#6][#6X3]            | 0.3535 | [CX3]([OX1])O                          | 0.1004 |
| [cH]cO                      | 0.3506 | [CX3]([O])[OX2H1]                      | 0.1019 |
| [CX4H3][cX3H0]              | 0.3258 | [#8][#6][#6H2]                         | 0.1745 |
| [#6]1[#6][#6][#6][#6][#6]1  | 0.3213 | [#6H1][#7][#6H1]                       | 0.2382 |
| o[cH]                       | 0.3205 | [#6X3][#6H2][#6X3]                     | 0.2408 |

---

Example 11 true smiles: NC(CCC(=O)O)C(=O)O formula: C5H9NO4  
 Index of correct structure: 0 of 92537  
 True structure loss: 0.028545  
 True structure:

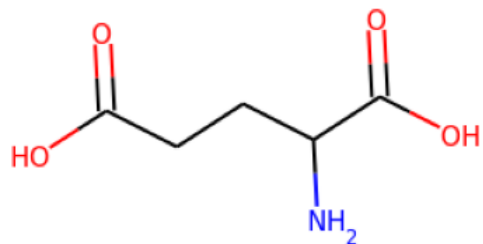

Experimental <sup>13</sup>C NMR (solvent: D2O)

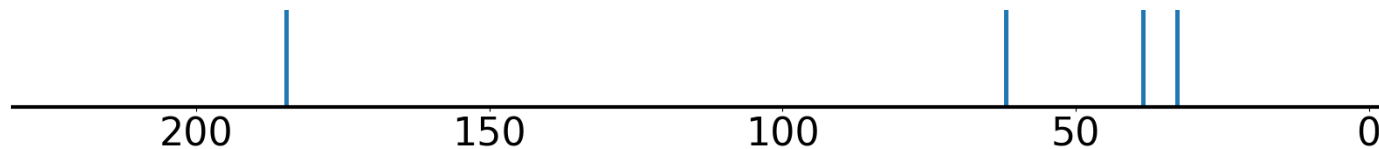

Experimental <sup>1</sup>H NMR (solvent: D2O)

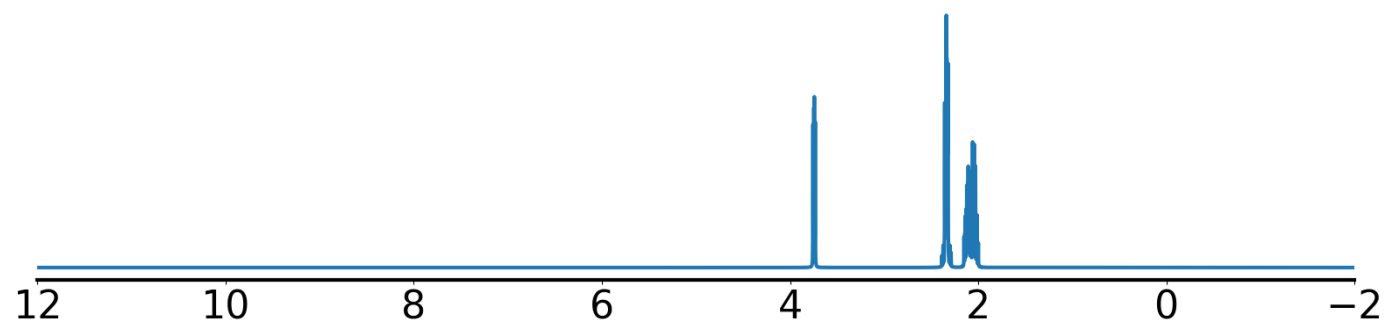

Top predicted structures (loss):

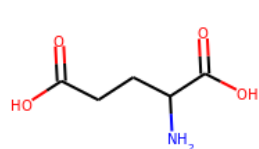

0.028545

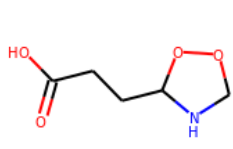

0.037194

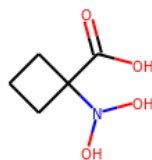

0.039214

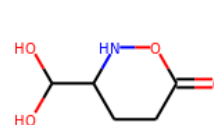

0.042218

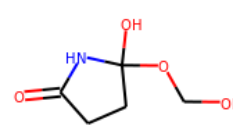

0.042586

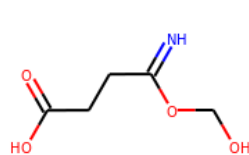

0.042857

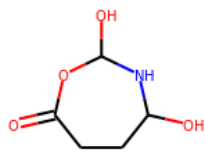

0.043528

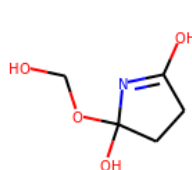

0.043671

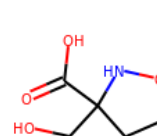

0.044099

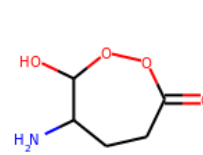

0.044258



| Top predicted substructures | prob        |                                    |             |
|-----------------------------|-------------|------------------------------------|-------------|
| [CX4H2]([#6])[#6]           | 0.9996      | [CX3](=[OX1])O                     | 0.8933      |
| [OX2H1]                     | 0.9984      | [CX3](=O)[OX2H1]                   | 0.8039      |
| [CX3](=[OX1])C              | 0.9976      | O=[CX3H0][CX4H2][CX4H2]            | 0.7848      |
| [#8]=[#6][#8]               | 0.9298      | [#6H1]                             | 0.7701      |
| OCC[CH2]                    | 0.905       | [#8][#6][#6H2]                     | 0.7503      |
| <b>best positives</b>       | <b>prob</b> | <b>best negatives</b>              | <b>prob</b> |
| [CX4H2]([#6])[#6]           | 0.9996      | [CX2H1]#[CX2H0][CX3H1]=[CX3H0]     | 0.0         |
| [OX2H1]                     | 0.9984      | CC=CCC#C                           | 0.0         |
| [CX3](=[OX1])C              | 0.9976      | [CX3H0](=[CX3H2])([CX4H3])[CX4H2]  | 0.0         |
| [#8]=[#6][#8]               | 0.9298      | [#6H3][#6X3][#6X3]=[#6X3H2]        | 0.0         |
| OCC[CH2]                    | 0.905       | CCC=CC#C                           | 0.0         |
| [CX3](=[OX1])O              | 0.8933      | CC=CC#CC                           | 0.0         |
| [CX3](=O)[OX2H1]            | 0.8039      | [CX3H1](=[CX3H1])[CX2H0]           | 0.0         |
| O=[CX3H0][CX4H2][CX4H2]     | 0.7848      | CC#CCC=C                           | 0.0         |
| [#6H1]                      | 0.7701      | C=CC=CC#C                          | 0.0         |
| [#8][#6][#6H2]              | 0.7503      | [#6X3H1]=[#6X3H1][#6X3H0]=[#6X3H1] | 0.0         |
| <b>worst negatives</b>      | <b>prob</b> | <b>worst positives</b>             | <b>prob</b> |
| [#8][#6][#6][#6][#6]=[#8]   | 0.5993      | [#7H2][#6X4H1][#6X3]               | 0.0157      |
| [#8][#6][#6][#6][#6][#8]    | 0.3958      | [CX4H1]([NX3H2])([CX4H2])[CX3H0]   | 0.0617      |
| [#6H1][#6H1]                | 0.3574      | [#7X3H2]                           | 0.2904      |
| [CX4H]O                     | 0.3514      | [CX3H0](=[OX1H0])([OX2H1])[CX4H2]  | 0.3337      |
| [#7X3H1]                    | 0.3479      | [#8]=[#6H0][#6H1]                  | 0.3363      |
| [CX4H2]([OX2H1])[CX4H2]     | 0.3249      | [OX1H0]=[CX3H0]([#8])[CX4H2]       | 0.3559      |
| [#8][#6][#6][#6X3]          | 0.2829      | [CX3H0](=[OX1H0])([OX2H1])[CX4H1]  | 0.4671      |
| [OH][CX4H]                  | 0.2425      | [#7H2][#6H1]                       | 0.4793      |
| [#7][#6H1][#6H2r5]          | 0.232       | O=[CX3][CX4H]                      | 0.5061      |
| [CH2X4](O)[CX4H2]           | 0.2256      | [CX4H2]([CX4H2])[CX4H1]            | 0.5111      |

---

Example 12 true smiles: Nc1ccc(O)c1N formula: C6H8N2O  
Index of correct structure: 3 of 75211  
True structure loss: 0.022729  
True structure:

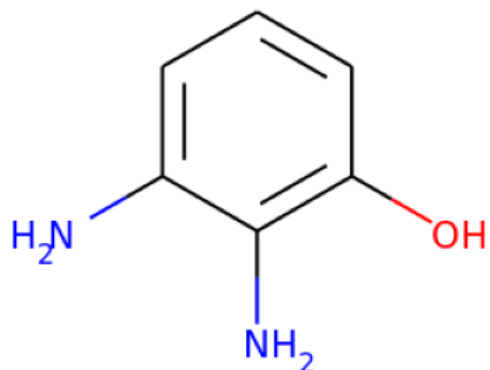

Experimental  $^{13}\text{C}$  NMR (solvent: DMSO)

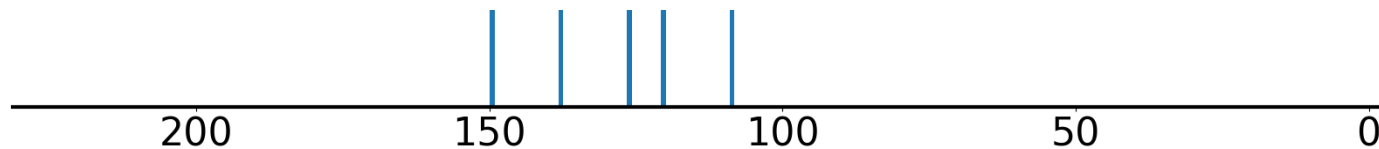

Experimental  $^1\text{H}$  NMR (solvent:  $\text{CDCl}_3$ )

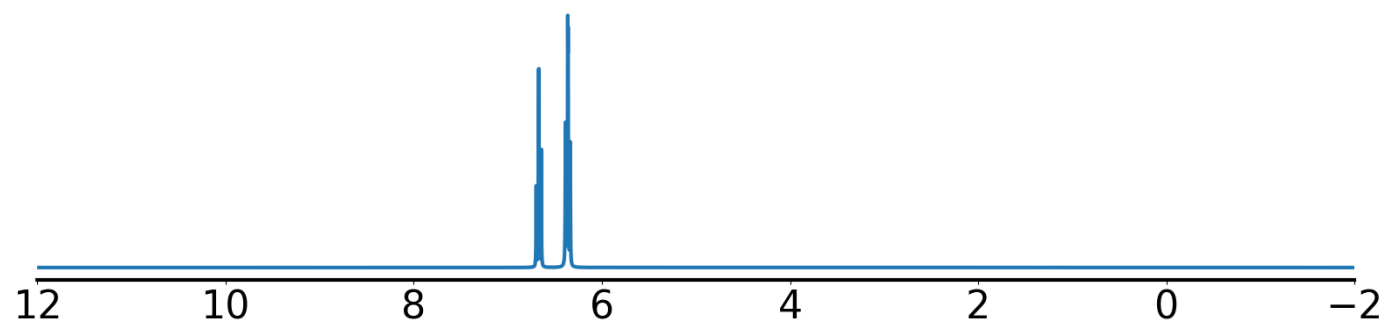

Top predicted structures (loss):

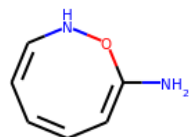

0.021308

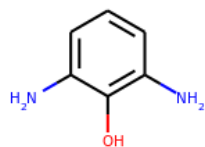

0.02231

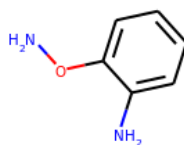

0.022402

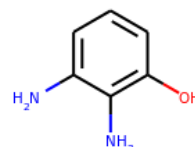

0.022729

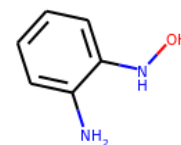

0.022749

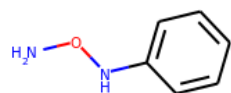

0.023122

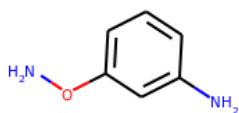

0.024044

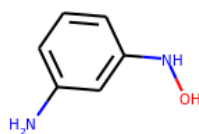

0.02418

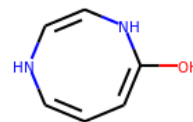

0.025169

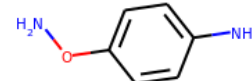

0.025648

|                                  |        |                                              |        |
|----------------------------------|--------|----------------------------------------------|--------|
| Top predicted substructures      | prob   |                                              |        |
| [#6H1]                           | 0.9989 | [cH]                                         | 0.9648 |
| [#6X3][#6X3]                     | 0.9954 | [#7][#6][#6][#6X3]                           | 0.9045 |
| [#6X3H1][#6X3H0]                 | 0.9932 | [cH][cH]                                     | 0.9043 |
| [#6X3][#6X3][#6X3][#6X3]         | 0.9837 | [#7][#6X3H0][#6X3H1]                         | 0.8842 |
| [#7][#6][#6X3]                   | 0.9791 | [#6H1][#6H1]                                 | 0.8818 |
| best positives                   | prob   | best negatives                               | prob   |
| [#6H1]                           | 0.9989 | [OX1H0]=[CX3H0]1[CX4H1][CX4H1][CX4H2]1       | 0.0    |
| [#6X3][#6X3]                     | 0.9954 | [OX2H0]1[CX4H2][CX4H2][CX4H1][CX4H1]1        | 0.0    |
| [#6X3H1][#6X3H0]                 | 0.9932 | [OX2H0][CX4H2][CX4H2][CX4H1][OX2H0]          | 0.0    |
| [#6X3][#6X3][#6X3][#6X3]         | 0.9837 | [OX2H1][CX4H1]1[CX4H1][CX4H2][CX4H1]1        | 0.0    |
| [#7][#6][#6X3]                   | 0.9791 | [OX2H1][CX4H1][CX4H1]([CX4H1])[CX4H1]        | 0.0    |
| [cH]                             | 0.9648 | [CX4H0]([NX3H1])([CX4H3])([CX4H2])[CX4H1]    | 0.0    |
| [#7][#6][#6][#6X3]               | 0.9045 | [OX2H1][CX4H2][CX4H1]([CX4H2])[CX4H2]        | 0.0    |
| [cH][cH]                         | 0.9043 | [OX2H0][CX4H1][CX4H1]([CX4H2][CX4H1])[CX4H1] | 0.0    |
| [#7][#6X3H0][#6X3H1]             | 0.8842 | [CX4H1]([CX4H3])([CX4H2])[CX4H0]             | 0.0    |
| [#6H1][#6H1]                     | 0.8818 | [OX2H0]1[CX4H2][CX4H1]1[CX4H2]               | 0.0    |
| worst negatives                  | prob   | worst positives                              | prob   |
| [#6X3][#7][#6X3]                 | 0.7913 | [#6]1[#6][#6][#6][#6]1                       | 0.1071 |
| [#6X3][#7X3][#6X3]               | 0.7362 | [#7][#6][#6][#7]                             | 0.1733 |
| [#6]1[#6][#6][#6][#7]1           | 0.6031 | [cX3H0]([cX3H1])([cX3H0])[OX2H1]             | 0.3688 |
| [#6X3H1][#6X3H1][#6X3H0][#6X3H1] | 0.5985 | [#8][#6H0][#6H1]                             | 0.4102 |
| [#7X3H1]                         | 0.5688 | [#8][#6][#6][#6X3]                           | 0.4976 |
| [#7H][#6X3H1]                    | 0.5175 | [OX2H][cX3]:[c]                              | 0.6236 |
| [#6H1r5][#7]                     | 0.4436 | [cH]cO                                       | 0.6685 |
| [CH2X3](=C)                      | 0.3305 | [cX3H1]([cX3H1])[cX3H1]                      | 0.7057 |
| [cX3H1]([nX3H1])[cX3H1]          | 0.3278 | [#7H2][#6H0]                                 | 0.7382 |
| [#6X3H2]                         | 0.3046 | [OX2H1]                                      | 0.7828 |

---

Example 13 true smiles: O=C(O)c1ccc(O)nc1 formula: C6H5NO3  
Index of correct structure: -1 of 67881  
True structure loss: 0.023869  
True structure:

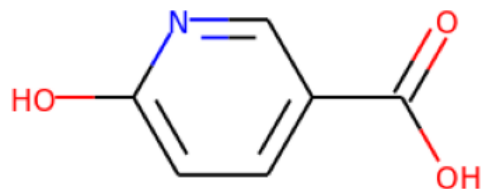

Experimental <sup>13</sup>C NMR (solvent: DMSO-d6)

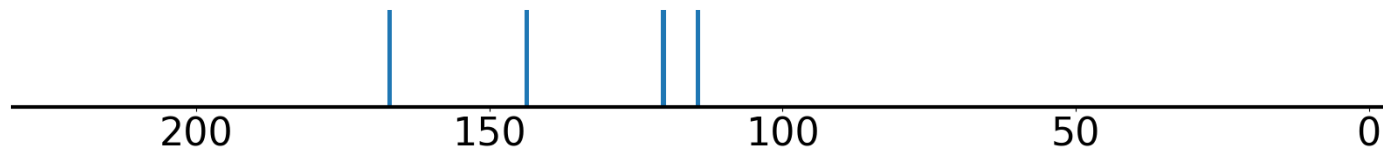

Experimental <sup>1</sup>H NMR (solvent: D2O)

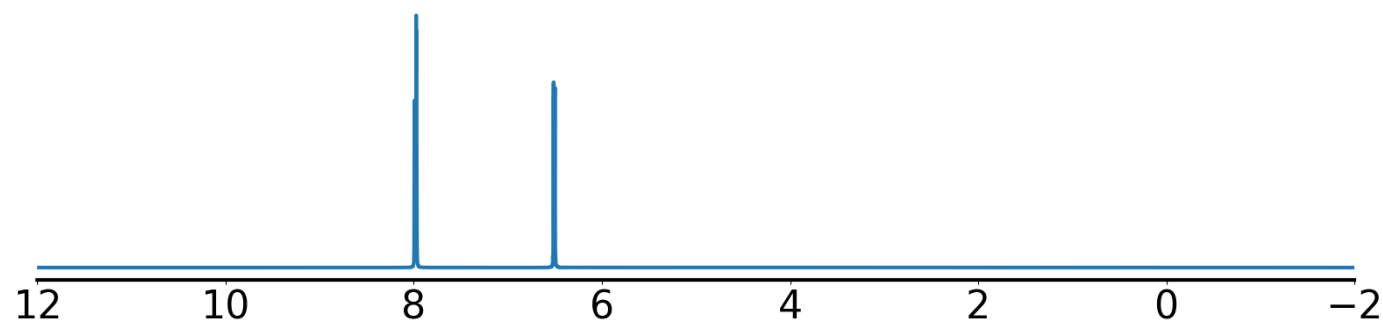

Top predicted structures (loss):

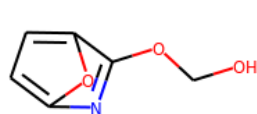

0.022012

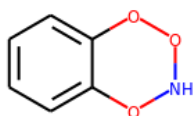

0.028095

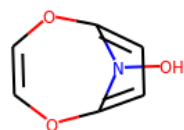

0.033325

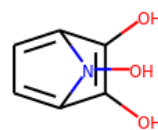

0.034622

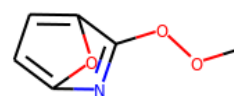

0.034832

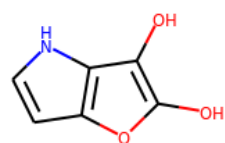

0.035773

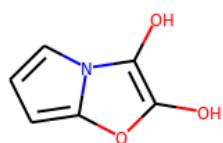

0.035795

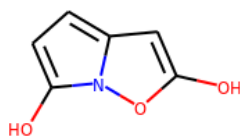

0.03586

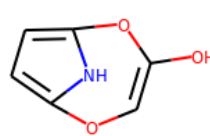

0.036143

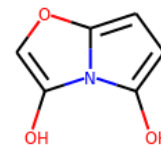

0.036339

| Top predicted substructures | prob   |                                           |  |        |
|-----------------------------|--------|-------------------------------------------|--|--------|
| [#6H1]                      | 0.9991 | [#6X3H1][#6X3H0]                          |  | 0.9599 |
| [#6X3][#6X3]                | 0.9979 | [cX3H1]([cX3H1])[cX3H0]                   |  | 0.9263 |
| [cH][cH]                    | 0.9821 | [#8][#6][#6][#6X3]                        |  | 0.8933 |
| [cH]                        | 0.9786 | [#6H1][#6H1]                              |  | 0.8554 |
| [#6X3][#6X3][#6X3][#6X3]    | 0.9604 | [#8]=[#6][#8]                             |  | 0.7644 |
| best positives              | prob   | best negatives                            |  | prob   |
| [#6H1]                      | 0.9991 | [OX2H0]1[CX4H2][CX4H2][CX4H1][CX4H1]1     |  | 0.0    |
| [#6X3][#6X3]                | 0.9979 | [OX2H1][CX4H2][CX4H1]([CX4H2])[CX4H2]     |  | 0.0    |
| [cH][cH]                    | 0.9821 | [OX2H0][CX4H2][CX4H2][CX4H1][OX2H0]       |  | 0.0    |
| [cH]                        | 0.9786 | [CX4H1]([OX2H1])([CX4H2])[CX2H0]          |  | 0.0    |
| [#6X3][#6X3][#6X3][#6X3]    | 0.9604 | [OX2H0][CX4H2][CX4H1]([CX4H1])[CX4H1]     |  | 0.0    |
| [#6X3H1][#6X3H0]            | 0.9599 | [CX4H0]([NX3H1])([CX4H3])([CX4H2])[CX4H1] |  | 0.0    |
| [cX3H1]([cX3H1])[cX3H0]     | 0.9263 | [CX4H1]([NX3H1])([CX4H3])[CX4H2]          |  | 0.0    |
| [#8][#6][#6][#6X3]          | 0.8933 | [#6H3][#7][#6X4H1][#6H3]                  |  | 0.0    |
| [#6H1][#6H1]                | 0.8554 | [CX4H0]([CX4H3])([CX4H2])([CX4H2])[CX3H0] |  | 0.0    |
| [#8]=[#6][#8]               | 0.7644 | [CX3H0](=[CX3H2])([CX4H2])[CX4H0]         |  | 0.0    |
| worst negatives             | prob   | worst positives                           |  | prob   |
| [cX3H1]([cX3H1])[cX3H1]     | 0.5307 | [cX3H1]([nX2H0])[cX3H0]                   |  | 0.0381 |
| O=[cX3]                     | 0.4282 | [#6]1[#6][#6][#6][#6][#7]1                |  | 0.1533 |
| [#8]=[#6][#6H1][#6H1]       | 0.4053 | [cX3H0][cX3H1][cX3H1][cX3H0]              |  | 0.2571 |
| [#8]=[#6H0][#6H1]           | 0.3276 | [CX3](=O)[OX2H1]                          |  | 0.3034 |
| [OX1H0]=[cX3H0][cX3H1]      | 0.3043 | [#7][#6H0][#6H1]                          |  | 0.361  |
| [#8][#6H1][#6H1]            | 0.2957 | [#7][#6X3H0][#6X3H1]                      |  | 0.3825 |
| [#8][#6][#6][#8]            | 0.2587 | [OX2H][cX3]:[c]                           |  | 0.4119 |
| [#8][#6][#6][#6][#6][#8]    | 0.2504 | [#6X3H1][#6X3H1][#6X3H0][#6X3H1]          |  | 0.4151 |
| [cX3H1]([cX2H0])[cX3H1]     | 0.2409 | [#6X3][#7][#6X3]                          |  | 0.4175 |
| o[cH]                       | 0.2264 | [cH]cO                                    |  | 0.4361 |

---

Example 14 true smiles: Oc1c[nH]c2ccccc12 formula: C8H7NO  
Index of correct structure: 3 of 59121  
True structure loss: 0.016676  
True structure:

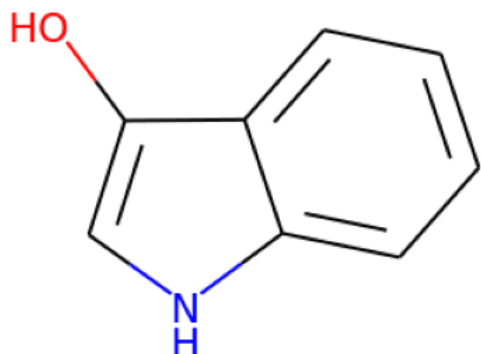

Experimental <sup>13</sup>C NMR (solvent: DMSO-d<sub>6</sub>)

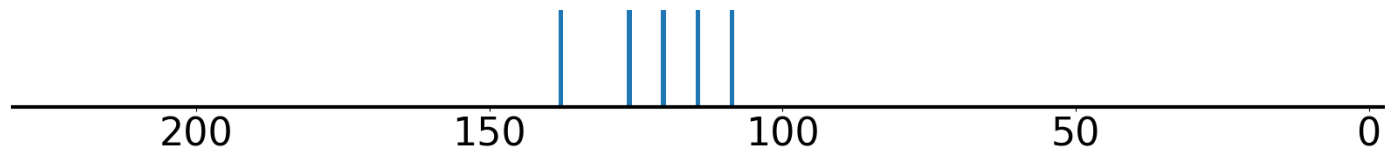

Experimental <sup>1</sup>H NMR (solvent: D<sub>2</sub>O)

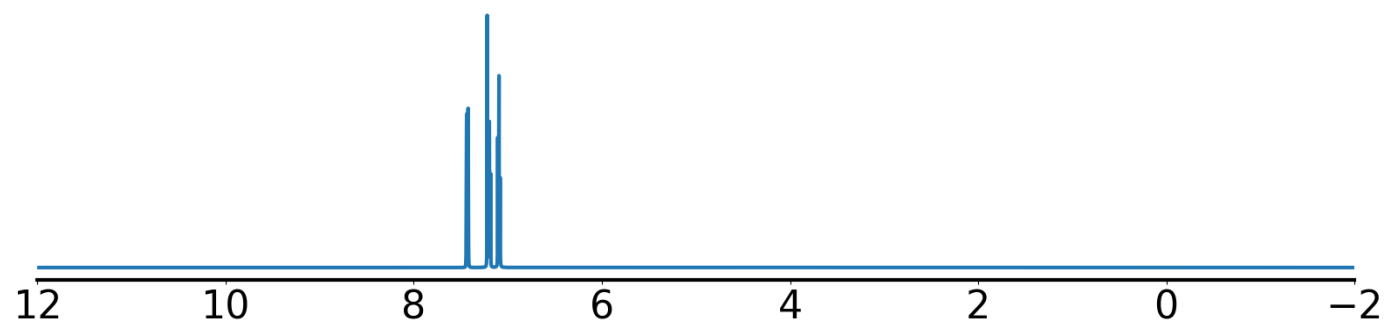

Top predicted structures (loss):

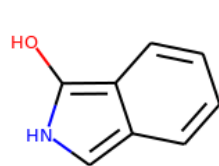

0.014749

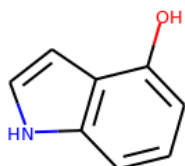

0.015962

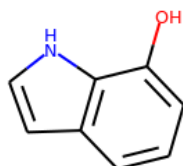

0.016278

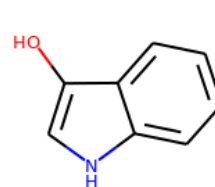

0.016676

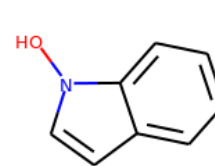

0.018786

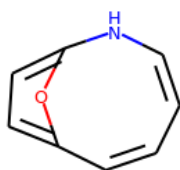

0.01948

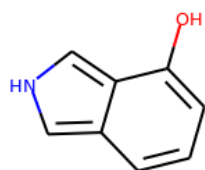

0.020223

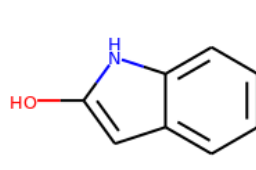

0.020537

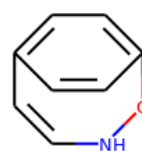

0.022308

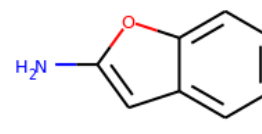

0.023469

| Top predicted substructures      | prob   |                                           | prob   |
|----------------------------------|--------|-------------------------------------------|--------|
| [#6H1]                           | 0.9997 | [#6X3H1][#6X3H0]                          | 0.9876 |
| [#6X3][#6X3][#6X3][#6X3]         | 0.9992 | [cX3H1]([cX3H1])[cX3H0]                   | 0.9814 |
| [#6X3][#6X3]                     | 0.9981 | [#6H1][#6H1]                              | 0.9794 |
| [cH][cH]                         | 0.9978 | [#6]1[#6][#6][#6][#6]1                    | 0.9362 |
| [cH]                             | 0.9976 | [cX3H1]([cX3H1])[cX3H1]                   | 0.9113 |
| best positives                   | prob   | best negatives                            | prob   |
| [#6H1]                           | 0.9997 | [#8][#6H1][#6H2][#6H1]=[#8]               | 0.0    |
| [#6X3][#6X3][#6X3][#6X3]         | 0.9992 | [OX2H0][CX4H2][CX4H2][CX4H1][OX2H0]       | 0.0    |
| [#6X3][#6X3]                     | 0.9981 | [CX4H0]([NX3H1])([CX4H3])([CX4H2])[CX4H1] | 0.0    |
| [cH][cH]                         | 0.9978 | [OX2H0][CX4H2][CX4H1]([CX4H1])[CX4H3]     | 0.0    |
| [cH]                             | 0.9976 | [OX1H0]=[CX3H0]1[CX4H1][CX4H1][CX4H2]1    | 0.0    |
| [#6X3H1][#6X3H0]                 | 0.9876 | [OX2H1][CX4H2][CX4H1]([CX4H2])[CX4H2]     | 0.0    |
| [cX3H1]([cX3H1])[cX3H0]          | 0.9814 | [CX3H0](=[CX3H2])([CX4H3])[CX4H0]         | 0.0    |
| [#6H1][#6H1]                     | 0.9794 | [CX4H0]([OX2H0])([CX4H3])([CX4H2])[CX4H1] | 0.0    |
| [#6]1[#6][#6][#6][#6]1           | 0.9362 | [CX4H1]([NX3H2])([CX4H2])[CX3H1]          | 0.0    |
| [cX3H1]([cX3H1])[cX3H1]          | 0.9113 | [OX2H0]1[CX4H2][CX4H1][CX4H1]1            | 0.0    |
| worst negatives                  | prob   | worst positives                           | prob   |
| [#6X3H1][#6X3H1][#6X3H0][#6X3H1] | 0.6089 | [cX3H0]([cX3H1])([cX3H0])[OX2H1]          | 0.1816 |
| [cX3H1]([nX3H1])[cX3H1]          | 0.425  | [OX2H][cX3]:[c]                           | 0.2116 |
| [#7]#[#6][#6][#6X3]              | 0.222  | [cX3H1]([nX3H1])[cX3H0]                   | 0.2718 |
| [#8][#6H1][#6H1]                 | 0.1837 | [cH]cO                                    | 0.307  |
| [#6]#[#7]                        | 0.1277 | [#7X3H1]                                  | 0.3084 |
| o[cH]                            | 0.1139 | [OX2H1]                                   | 0.4599 |
| [#7X3H0]                         | 0.1139 | [#7H][#6X3H1]                             | 0.526  |
| [#7]#[#6][#6X3]                  | 0.1137 | [#8][#6H0][#6H1]                          | 0.5433 |
| [#6X3H1][#7X3H0]                 | 0.1058 | [#6H1r5][#7]                              | 0.567  |
| [cX3H1]([nX3H0])[cX3H1]          | 0.1032 | [#7][#6X3H0][#6X3H1]                      | 0.5792 |

---

Example 15 true smiles: NC(=O)CC(N)C(=O)O formula: C4H8N2O3  
 Index of correct structure: 0 of 58024  
 True structure loss: 0.033268  
 True structure:

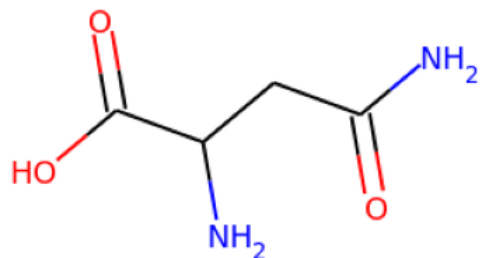

Experimental <sup>13</sup>C NMR (solvent: D2O)

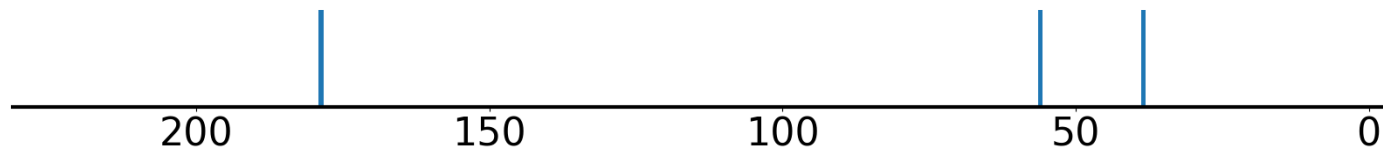

Experimental <sup>1</sup>H NMR (solvent: D2O)

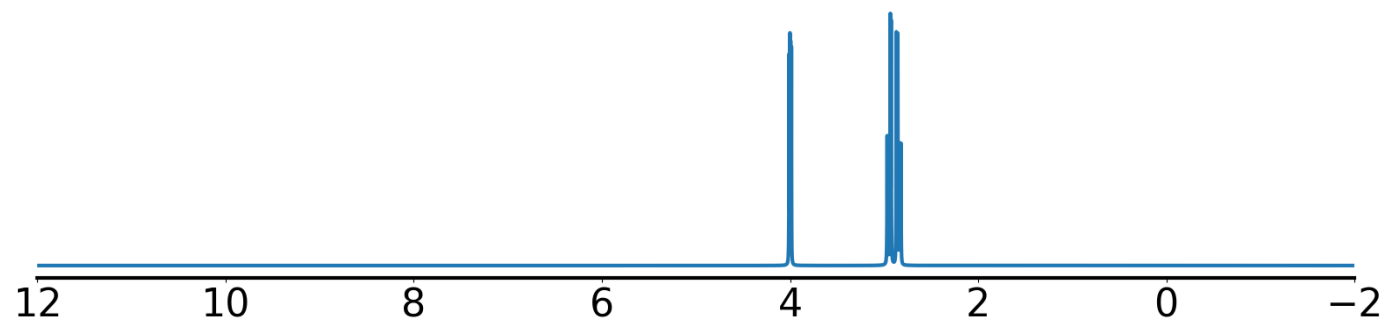

Top predicted structures (loss):

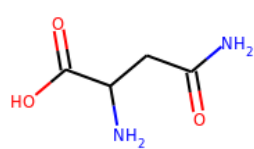

0.033268

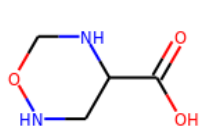

0.035903

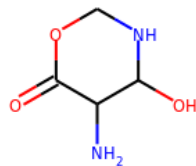

0.037272

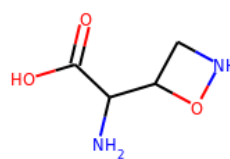

0.03757

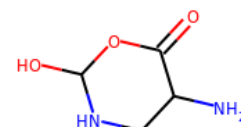

0.037613

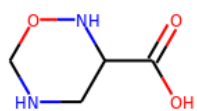

0.03893

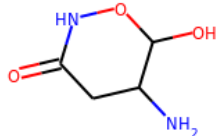

0.041735

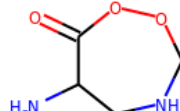

0.042075

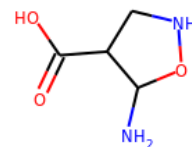

0.042357

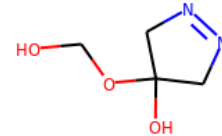

0.042735



| Top predicted substructures | prob   |                                   |        |
|-----------------------------|--------|-----------------------------------|--------|
| [CX3](=[OX1])C              | 0.9811 | [#8]=[#6H0][#6H1]                 | 0.7567 |
| [OX2H1]                     | 0.9512 | O=[CX3][CX4H]                     | 0.7458 |
| [#7X3H2]                    | 0.8666 | [CX3](=[OX1])O                    | 0.726  |
| [#8]=[#6][#8]               | 0.848  | [#6H1][#6H2]                      | 0.7157 |
| [#6H1]                      | 0.794  | [#7H2][#6H1]                      | 0.6811 |
| best positives              | prob   | best negatives                    | prob   |
| [CX3](=[OX1])C              | 0.9811 | [CX2H1]#[CX2H0][CX3H1]=[CX3H0]    | 0.0    |
| [OX2H1]                     | 0.9512 | [CX3H0](=[CX3H1])([CX4H2])[CX2H0] | 0.0    |
| [#7X3H2]                    | 0.8666 | [CX3H0](=[CX3H1])([OX2H0])[CX2H0] | 0.0    |
| [#8]=[#6][#8]               | 0.848  | CC=CCC#C                          | 0.0    |
| [#6H1]                      | 0.794  | CC#CCC=C                          | 0.0    |
| [#8]=[#6H0][#6H1]           | 0.7567 | [CX3H0](=[CX3H2])([CX4H3])[CX4H0] | 0.0    |
| O=[CX3][CX4H]               | 0.7458 | C=CC=CC#C                         | 0.0    |
| [CX3](=[OX1])O              | 0.726  | [CX3H0](=[CX3H0])([CX4H3])[CX3H1] | 0.0    |
| [#6H1][#6H2]                | 0.7157 | C=CCCC#C                          | 0.0    |
| [#7H2][#6H1]                | 0.6811 | [#6H3][#6X3][#6X3]=[#6X3H2]       | 0.0    |
| worst negatives             | prob   | worst positives                   | prob   |
| [#7][#6H2]                  | 0.58   | [#8]=[#6][#6][#6][#6]=[#8]        | 0.0702 |
| [#6H1][#6H1]                | 0.5766 | [#7H2][#6H0]                      | 0.1389 |
| [#7X3][#6H2]                | 0.5574 | [#8][#6H0][#6H1]                  | 0.2347 |
| [#7X3H1]                    | 0.5368 | [CX4H1]([NX3H2])([CX4H2])[CX3H0]  | 0.305  |
| [#8][#6][#6][#6X3]          | 0.4624 | [CX4H2]([CX4H1])[CX3H0]           | 0.3183 |
| [#8][#6H1][#6H1]            | 0.4136 | [#8]=[#6][#6H2][#6H1]             | 0.3464 |
| [CX4H]O                     | 0.4038 | O=[CX3H0][CX4H2][CX4H1]           | 0.3882 |
| [#8]=[#6][#6H1][#6H1]       | 0.2947 | [#8][#6][#6][#6][#6]=[#8]         | 0.3999 |
| [#7H1][#6X4H1][#6X3]        | 0.2866 | [CX3H0](=[OX1H0])([OX2H1])[CX4H1] | 0.5026 |
| [CX4H2]([NX3H1])[CX4H1]     | 0.2677 | [CX4H2]([#6])[#6]                 | 0.5386 |

---

Example 16 true smiles: NC(=O)c1ccncc1 formula: C6H6N2O  
Index of correct structure: -1 of 31495  
True structure loss: 0.014517  
True structure:

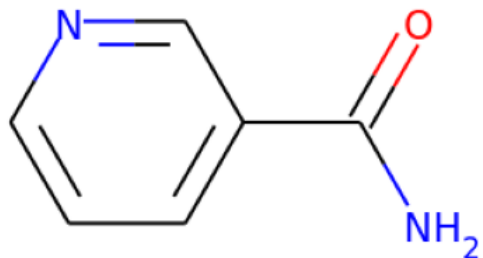

Experimental <sup>13</sup>C NMR (solvent: DMSO)

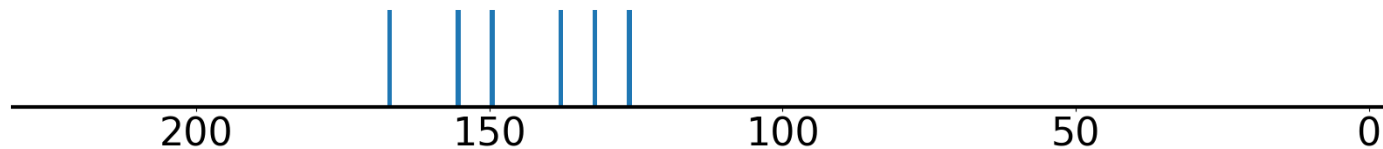

Experimental <sup>1</sup>H NMR (solvent: d2o)

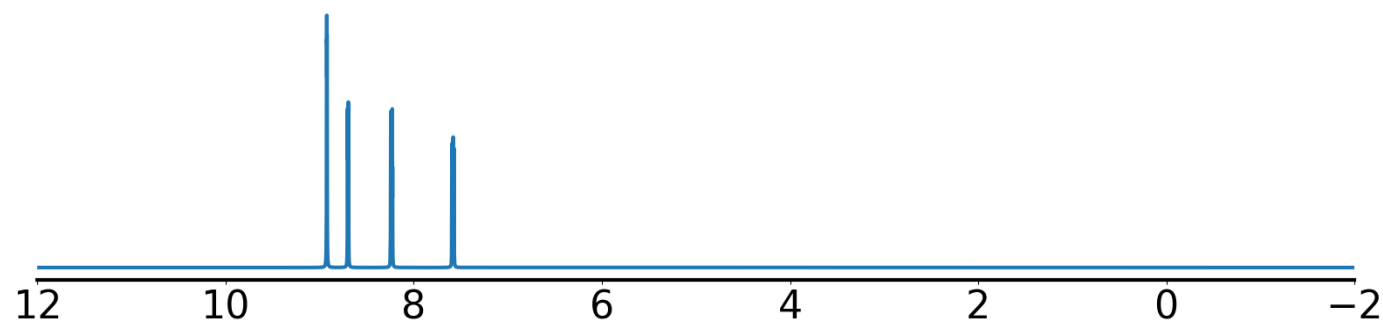

Top predicted structures (loss):

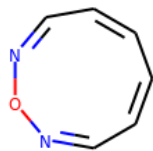

0.019746

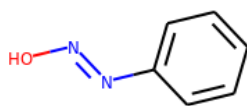

0.023498

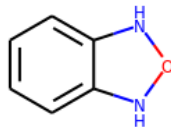

0.025849

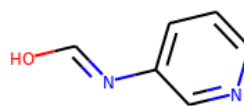

0.027113

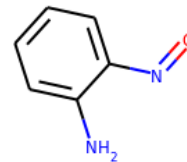

0.027799

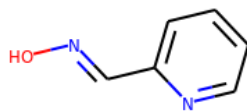

0.028293

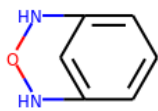

0.028402

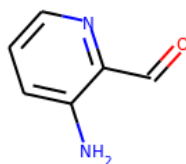

0.030001

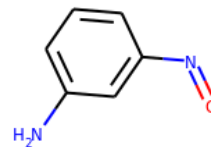

0.030352

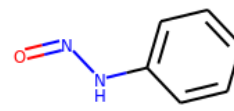

0.030973

|                             |        |                                           |        |
|-----------------------------|--------|-------------------------------------------|--------|
| Top predicted substructures | prob   |                                           |        |
| [#6H1]                      | 1.0    | [cH][cH]                                  | 0.9122 |
| [#6X3][#6X3]                | 0.9989 | [#6X3][#6X3][#6X3][#6X3]                  | 0.9103 |
| [#7][#6][#6][#6X3]          | 0.9754 | [#7][#6][#6X3]                            | 0.8758 |
| [cH]                        | 0.9649 | [#6H1][#7][#6H1]                          | 0.8639 |
| [#6X3H1][#6X3H0]            | 0.9639 | [#6H1][#6H1]                              | 0.847  |
| best positives              | prob   | best negatives                            | prob   |
| [#6H1]                      | 1.0    | [OX2H0]1[OX4H2][OX4H2][OX4H1][OX4H1]1     | 0.0    |
| [#6X3][#6X3]                | 0.9989 | [CX4H0]([OX2H0])([CX4H3])([CX4H2])[CX4H1] | 0.0    |
| [#7][#6][#6][#6X3]          | 0.9754 | [OX2H0][CX4H2][CX4H1]([CX4H1])[CX4H1]     | 0.0    |
| [cH]                        | 0.9649 | [OX1H0]=[CX3H0]1[OX4H1][OX4H1][OX4H2]1    | 0.0    |
| [#6X3H1][#6X3H0]            | 0.9639 | [CX4H1]([OX2H0])([CX4H2])[CX2H0]          | 0.0    |
| [cH][cH]                    | 0.9122 | [OX2H0][CX4H2][CX4H1]([CX4H1])[CX4H3]     | 0.0    |
| [#6X3][#6X3][#6X3][#6X3]    | 0.9103 | [OX2H0]1[OX4H2][OX4H1]1[OX4H2]            | 0.0    |
| [#7][#6][#6X3]              | 0.8758 | [OX2H0]1[OX4H2][CX4H1]1[OX4H1]            | 0.0    |
| [#6H1][#7][#6H1]            | 0.8639 | [#6H3][#6H2][#6H1r4]                      | 0.0    |
| [#6H1][#6H1]                | 0.847  | [OX2H0]1[OX4H2][CX4H1][CX4H1]1            | 0.0    |
| worst negatives             | prob   | worst positives                           | prob   |
| [#7][#6H0][#6H1]            | 0.5251 | [#7X3H2]                                  | 0.1455 |
| [#7][#6X3H0][#6X3H1]        | 0.4934 | [#7H2][#6H0]                              | 0.1551 |
| [cH]cO                      | 0.2763 | [#7][#6][#6][#6][#7]                      | 0.3388 |
| [#8][#6][#6][#6X3]          | 0.2686 | O=[#6][#6][#6X3]                          | 0.4086 |
| [#7H][#6X3H1]               | 0.1733 | [#6X3H1][#6X3H1][#6X3H0][#6X3H1]          | 0.6152 |
| [#7X3H1]                    | 0.1682 | [cX3H1]([nX2H0])[cX3H0]                   | 0.6357 |
| [OX2H1]                     | 0.1197 | [cX3H1]([cX3H1])[cX3H0]                   | 0.6695 |
| [#7]=[#6][#6X3]             | 0.1191 | [#6]1[#6][#6][#6][#6][#7]1                | 0.72   |
| [#7][#7]                    | 0.1179 | [cX3H1]([cX3H1])[cX3H1]                   | 0.791  |
| [#7][#6][#7]                | 0.109  | [cX3H1]([nX2H0])[cX3H1]                   | 0.8094 |

---

Example 17 true smiles: CN(C)C(=N)NC(=N)N formula: C4H11N5  
 Index of correct structure: 3 of 30817  
 True structure loss: 0.01683  
 True structure:

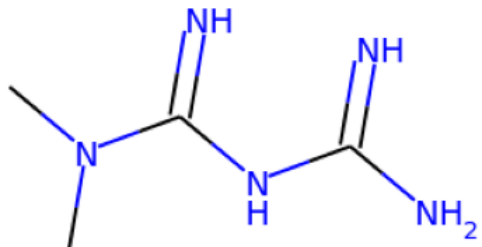

Experimental <sup>13</sup>C NMR (solvent: D2O)

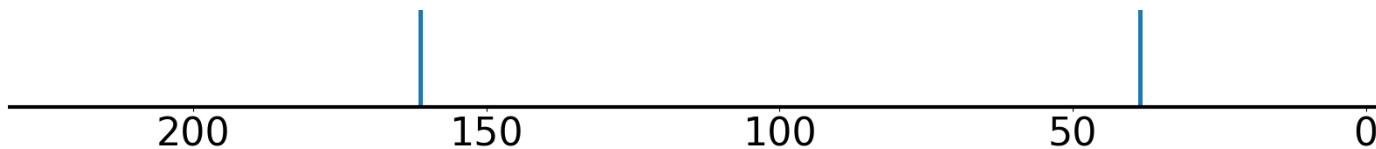

Experimental <sup>1</sup>H NMR (solvent: d2o)

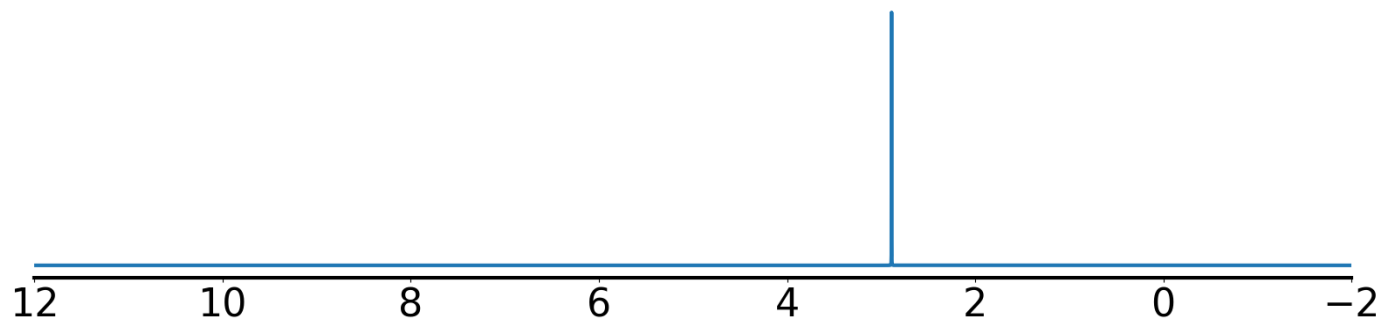

Top predicted structures (loss):

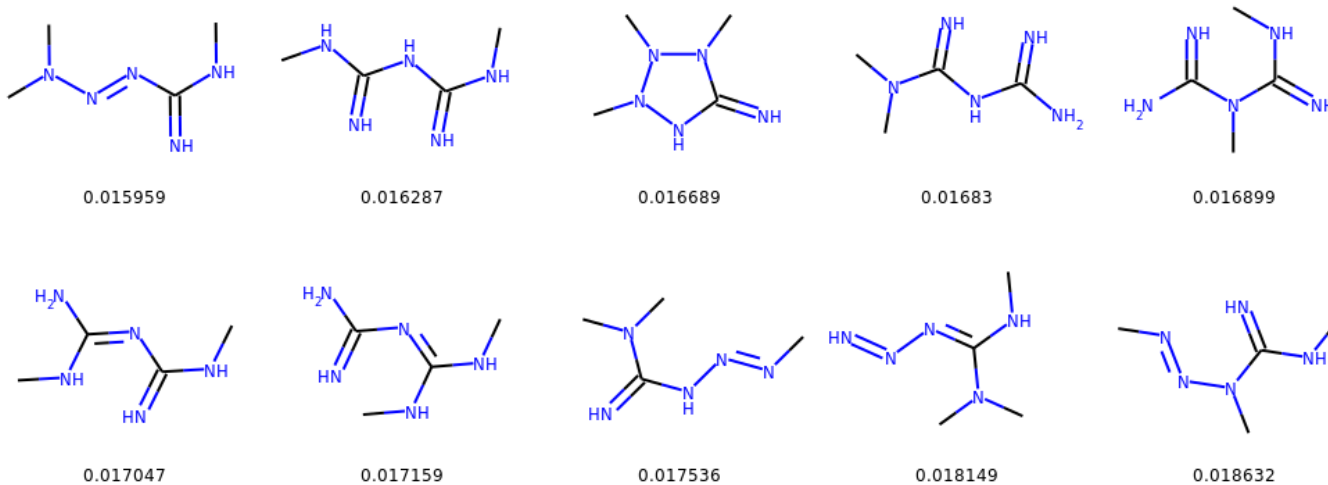

|                             |        |                                        |        |
|-----------------------------|--------|----------------------------------------|--------|
| Top predicted substructures | prob   |                                        |        |
| [CX4H3]                     | 0.9746 | [#7][#6][#7]                           | 0.9401 |
| [#7][#6]([#7])=[#7]         | 0.9737 | [#7][#6]=[#7]                          | 0.9356 |
| [#6H3][#7]                  | 0.9719 | [#7X3][#6H3]                           | 0.8762 |
| [#7][#6H0]=[#7]             | 0.946  | [NH1][#6]=[#7]                         | 0.8544 |
| [#7][#6H0][#7]              | 0.944  | [NH1][#6][#7]                          | 0.7823 |
| best positives              | prob   | best negatives                         | prob   |
| [CX4H3]                     | 0.9746 | [#8][#6H1]=[#6H1][#6H3]                | 0.0    |
| [#7][#6]([#7])=[#7]         | 0.9737 | [OX1H0]=[CX3H0]1[CX4H1][CX4H1][CX4H2]1 | 0.0    |
| [#6H3][#7]                  | 0.9719 | [#6X3H2]=[#6][#6H2][#8H]               | 0.0    |
| [#7][#6H0]=[#7]             | 0.946  | [#8][#6H1][#6H2][#6H1]=[#8]            | 0.0    |
| [#7][#6H0][#7]              | 0.944  | [OX2H0]1[CX4H2][CX4H1][CX3H0]=[CX3H1]1 | 0.0    |
| [#7][#6][#7]                | 0.9401 | [CX3H0]([CX3H2])([CX4H3])[CX4H0]       | 0.0    |
| [#7][#6]=[#7]               | 0.9356 | [#8]1[#6][#6]=[#6][#6]=[#6]1           | 0.0    |
| [#7X3][#6H3]                | 0.8762 | C=CCCC#C                               | 0.0    |
| [NH1][#6]=[#7]              | 0.8544 | C=CC=CC#C                              | 0.0    |
| [NH1][#6][#7]               | 0.7823 | [CX3H0]([CX3H2])([OX2H0])[CX4H3]       | 0.0    |
| worst negatives             | prob   | worst positives                        | prob   |
| [CX4H3][NX3H1]              | 0.4833 | [#6X3][#7][#6X3]                       | 0.1032 |
| [#7][#7]                    | 0.471  | [#6X3][#7X3][#6X3]                     | 0.1357 |
| [#7][#6][#6X3]              | 0.3816 | [#7H2][#6H0]                           | 0.2716 |
| [#6]1[#6][#7][#6][#7]1      | 0.28   | [CX4H3][NX3H0]                         | 0.3068 |
| [#7][#6H0][#6H1]            | 0.2613 | [#7X3H0]                               | 0.5055 |
| [#7][#6][#6][#7]            | 0.2198 | [#6]=[#7H]                             | 0.6239 |
| [#7][#7H1]                  | 0.2163 | [#7H1][#6H0][#7X3][#6H3]               | 0.6275 |
| [#7][#6][#6][#6X3]          | 0.1824 | [#7H1]=[#6H0][#7X3][#6H3]              | 0.6521 |
| [#6H1]                      | 0.18   | [NH1]=[#6][#7]                         | 0.7112 |
| [#7X3][#6H2]                | 0.1377 | [#6H3][#7][#6X3]                       | 0.7473 |

---

Example 18 true smiles: Cc1c[nH]c2ccccc12 formula: C9H9N  
Index of correct structure: 0 of 29511  
True structure loss: 0.013431  
True structure:

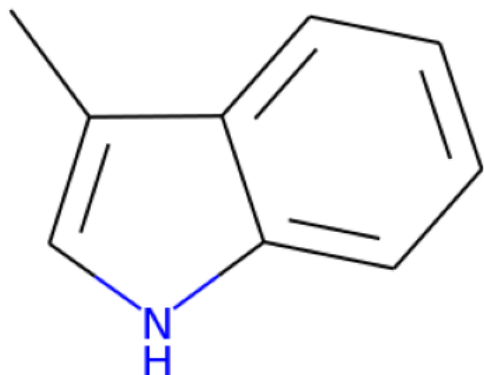

Experimental <sup>13</sup>C NMR (solvent: CDCl<sub>3</sub>)

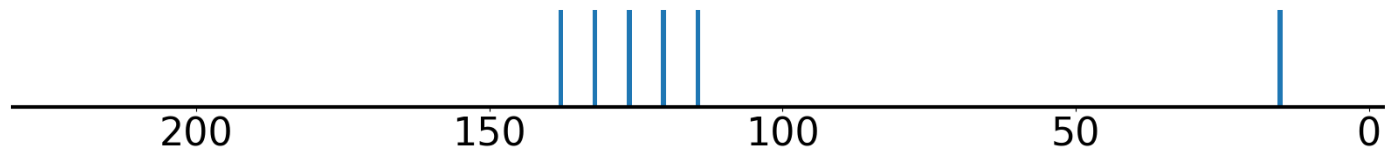

Experimental <sup>1</sup>H NMR (solvent: d<sub>2</sub>o)

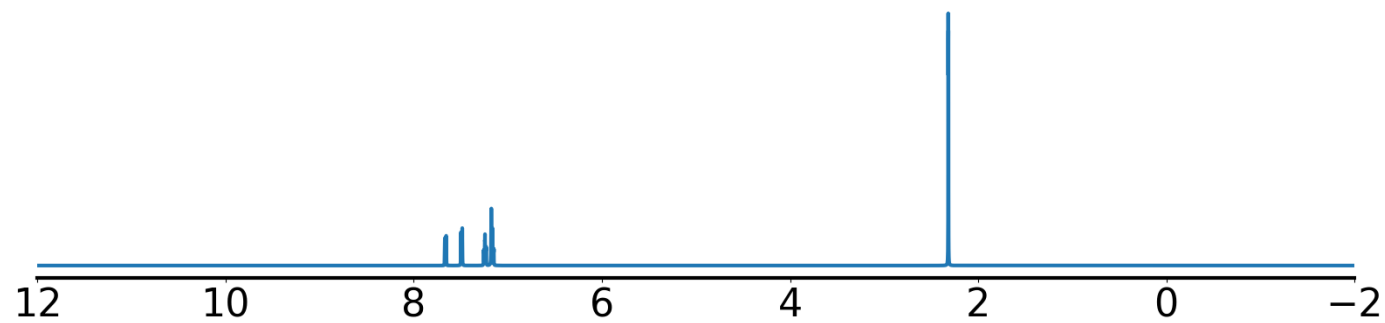

Top predicted structures (loss):

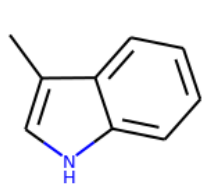

0.013431

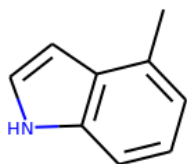

0.014915

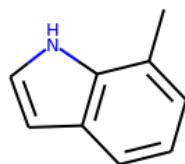

0.015945

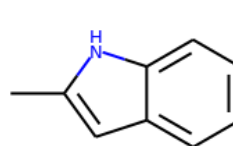

0.016185

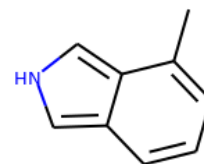

0.018507

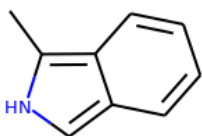

0.019129

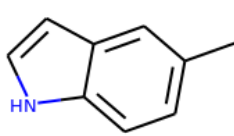

0.020373

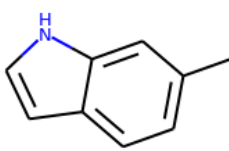

0.020373

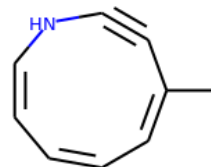

0.021081

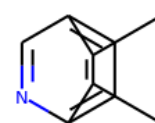

0.022922

| Top predicted substructures      | prob   |                                       |  |        |
|----------------------------------|--------|---------------------------------------|--|--------|
| [#6H1]                           | 0.9998 | [cH]                                  |  | 0.9964 |
| [#6X3][#6X3][#6X3][#6X3]         | 0.9998 | [#6X3H1][#6X3H0]                      |  | 0.9958 |
| [#6X3][#6X3]                     | 0.9997 | [#6H3][#6H0]                          |  | 0.9949 |
| [#6H3][#6][#6]                   | 0.9996 | [cH][cH]                              |  | 0.993  |
| [CX4H3]                          | 0.9995 | [#6X3][#6][#6][#6H3]                  |  | 0.9926 |
| best positives                   | prob   | best negatives                        |  | prob   |
| [#6H1]                           | 0.9998 | [OX2H0]1[CX4H2][CX4H2][CX4H1][CX4H1]1 |  | 0.0    |
| [#6X3][#6X3][#6X3][#6X3]         | 0.9998 | [#8][#6H1][#6H2][#6H1]=[#8]           |  | 0.0    |
| [#6X3][#6X3]                     | 0.9997 | [OX2H0][CX4H2][CX4H2][CX4H1][OX2H0]   |  | 0.0    |
| [#6H3][#6][#6]                   | 0.9996 | [OX2H1][CX4H1][CX4H1]([CX4H1])[CX4H1] |  | 0.0    |
| [CX4H3]                          | 0.9995 | [OX2H0]1[CX4H2][CX4H1][CX4H1]1        |  | 0.0    |
| [cH]                             | 0.9964 | [OX2H0][CX4H2][CX4H1]([CX4H1])[CX4H3] |  | 0.0    |
| [#6X3H1][#6X3H0]                 | 0.9958 | [OX2H1][CX4H0][CX4H1]([CX4H2])[CX4H1] |  | 0.0    |
| [#6H3][#6H0]                     | 0.9949 | [OX2H0][CX4H2][CX4H0][OX2H0]          |  | 0.0    |
| [cH][cH]                         | 0.993  | [CX4H1]([OX2H1])([CX4H2])[CX2H0]      |  | 0.0    |
| [#6X3][#6][#6][#6H3]             | 0.9926 | [OX2H0][CX4H2][CX4H1]([CX4H1])[CX4H1] |  | 0.0    |
| worst negatives                  | prob   | worst positives                       |  | prob   |
| [#6X3H1][#6X3H1][#6X3H0][#6X3H1] | 0.6176 | [#7X3H1]                              |  | 0.1356 |
| [#6]1[#6][#6][#6][#6][#7]1       | 0.4272 | [#7H][#6X3H1]                         |  | 0.1907 |
| [cX3H1]([nX3H0])[cX3H1]          | 0.2115 | [#6H1r5][#7]                          |  | 0.3164 |
| [cX3H1]([cX3H0])[cX3H0]          | 0.1724 | [cX3H1]([nX3H1])[cX3H0]               |  | 0.3305 |
| [cX3H0][cX3H1][cX3H1][cX3H0]     | 0.1673 | [#6X3][#7X3][#6X3]                    |  | 0.5106 |
| [#7]#[#6][#6][#6X3]              | 0.1381 | [#6H3][#6H0][#6H1][#7]                |  | 0.5436 |
| [cX3H1]([nX3H1])[cX3H1]          | 0.1244 | [cX3H0]([cX3H1])([cX3H0])[CX4H3]      |  | 0.6386 |
| [#7]#[#6][#6X3]                  | 0.1079 | [#7][#6H0][#6H1]                      |  | 0.6627 |
| [#6X3H1][#7X3H0]                 | 0.0927 | [#7][#6X3H0][#6X3H1]                  |  | 0.6877 |
| o[cH]                            | 0.0587 | [#6]1[#6][#6][#6][#7]1                |  | 0.6971 |

Example 19 true smiles: COc1cccc(N)c1 formula: C7H9NO  
Index of correct structure: 1 of 29421  
True structure loss: 0.022269  
True structure:

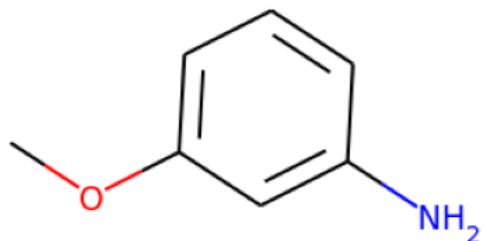

Experimental <sup>13</sup>C NMR (solvent: CDCl<sub>3</sub>)

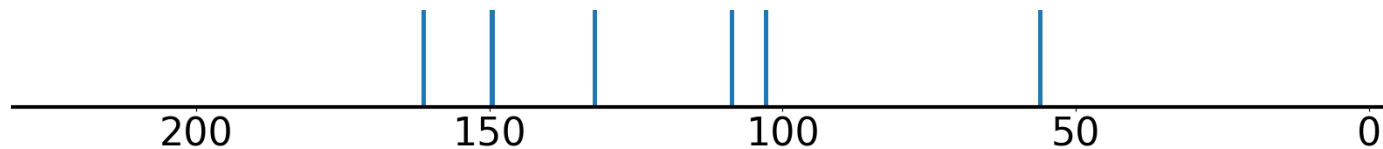

Experimental <sup>1</sup>H NMR (solvent: CDCl<sub>3</sub>)

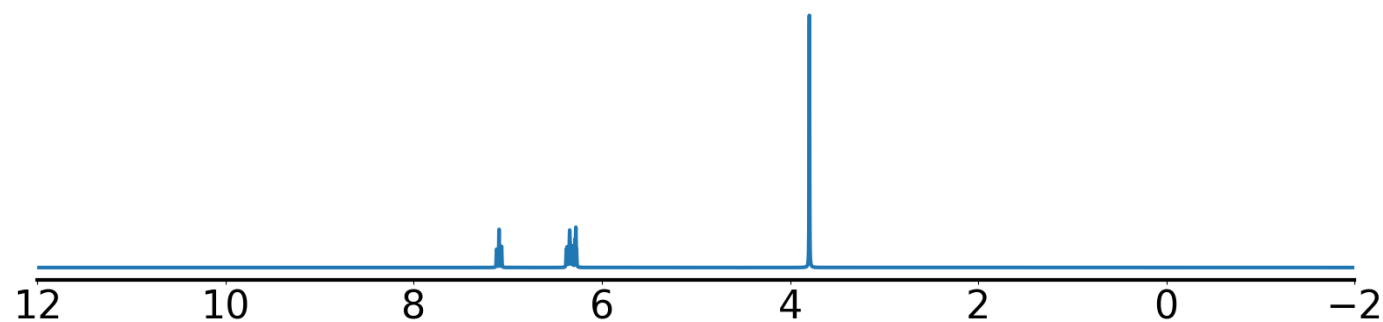

Top predicted structures (loss):

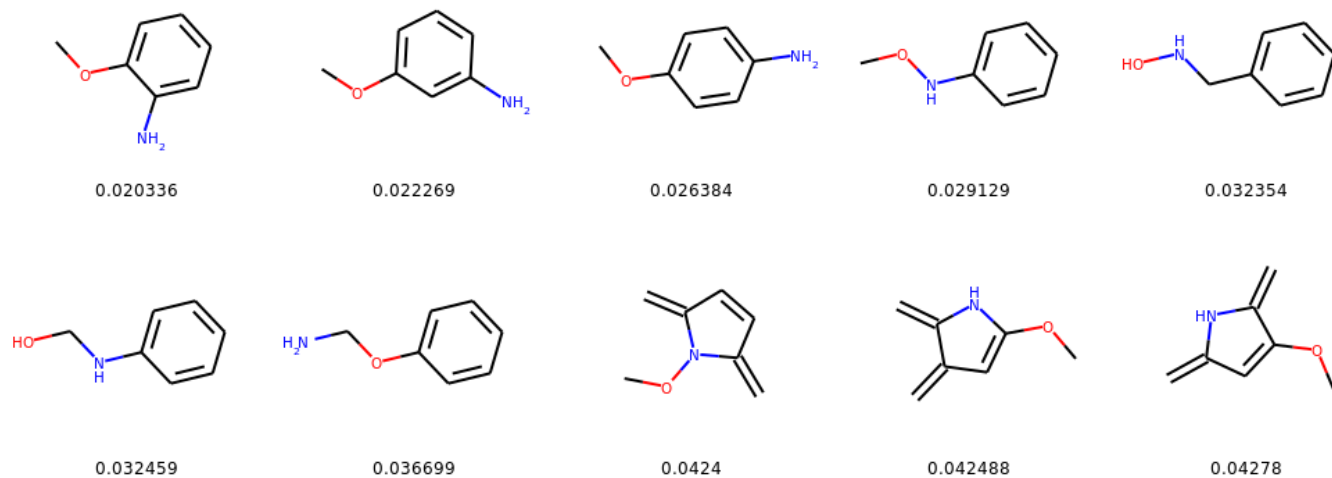



|                             |        |                                              |        |
|-----------------------------|--------|----------------------------------------------|--------|
| Top predicted substructures | prob   |                                              |        |
| [#6H1]                      | 0.9992 | [cH][cH]                                     | 0.9391 |
| [#6X3][#6X3]                | 0.9868 | [CX4H3][OX2H0]                               | 0.9129 |
| [CX4H3]                     | 0.9649 | [cX3H1]([cX3H1])[cX3H0]                      | 0.9118 |
| [#6X3H1][#6X3H0]            | 0.9553 | [cH]                                         | 0.9067 |
| [#7][#6][#6X3]              | 0.95   | [#6H1][#6H1]                                 | 0.8959 |
| best positives              | prob   | best negatives                               | prob   |
| [#6H1]                      | 0.9992 | [OX2H0]1[CX4H2][CX4H2][CX4H1][CX4H1]1        | 0.0    |
| [#6X3][#6X3]                | 0.9868 | [OX2H1][CX4H1]1[CX4H1][CX4H2][CX4H1]1        | 0.0    |
| [CX4H3]                     | 0.9649 | [OX2H0][CX4H1][CX4H1]([CX4H2][CX4H1])[CX4H1] | 0.0    |
| [#6X3H1][#6X3H0]            | 0.9553 | [CX4H0]([CX4H3])([CX4H2])([CX4H1])[CX4H1]    | 0.0    |
| [#7][#6][#6X3]              | 0.95   | [CX4H0]([OX2H0])([CX4H3])([CX4H2])[CX4H1]    | 0.0    |
| [cH][cH]                    | 0.9391 | [CX4H1]([CX4H3])([CX4H2])[CX4H0]             | 0.0    |
| [CX4H3][OX2H0]              | 0.9129 | [CX4H0]([NX3H1])([CX4H3])([CX4H2])[CX4H1]    | 0.0    |
| [cX3H1]([cX3H1])[cX3H0]     | 0.9118 | [OX2H1][CX4H2][CX4H1]([CX4H2])[CX4H2]        | 0.0    |
| [cH]                        | 0.9067 | CCC#CC#C                                     | 0.0    |
| [#6H1][#6H1]                | 0.8959 | [OX2H0][CX4H2][CX4H2][CX4H1][OX2H0]          | 0.0    |
| worst negatives             | prob   | worst positives                              | prob   |
| [CHX3](=C)C                 | 0.5402 | [#6]1[#6][#6][#6][#6]1                       | 0.0966 |
| [#6X3][#7][#6X3]            | 0.4149 | [#7H2][#6H0]                                 | 0.1806 |
| [#7X3H1]                    | 0.4128 | [cX3H1]([cX3H0])[cX3H0]                      | 0.2022 |
| [#7X3][#6H2]                | 0.3836 | [#7X3H2]                                     | 0.2045 |
| [#6X3][#7X3][#6X3]          | 0.3677 | [#6X3H1][#6X3H1][#6X3H0][#6X3H1]             | 0.3828 |
| [CHX3]=[CHX3]               | 0.3589 | [#8][#6][#6][#6X3]                           | 0.4801 |
| [#6]1[#6][#6][#6][#7]1      | 0.3152 | [cH]cO                                       | 0.4876 |
| [#6X3][#6H2][#7]            | 0.2789 | [#7][#6H0][#6H1]                             | 0.599  |
| [CX3H1](=[CX3H1])[CX3H0]    | 0.2697 | [#7][#6X3H0][#6X3H1]                         | 0.6884 |
| [#6X3H2]                    | 0.2192 | [cX3H1]([cX3H1])[cX3H1]                      | 0.7187 |

---

Example 20 true smiles: COc1ccccc1N formula: C7H9NO  
Index of correct structure: 0 of 29421  
True structure loss: 0.017036  
True structure:

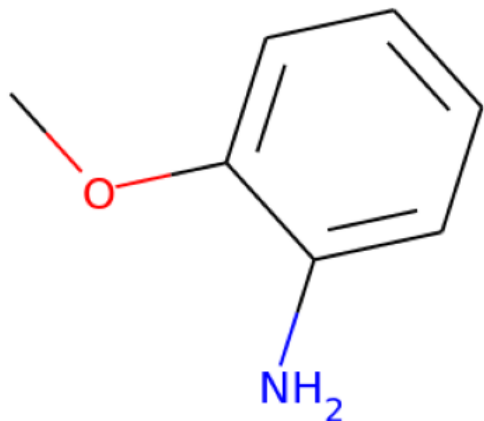

Experimental <sup>13</sup>C NMR (solvent: CDCl<sub>3</sub>)

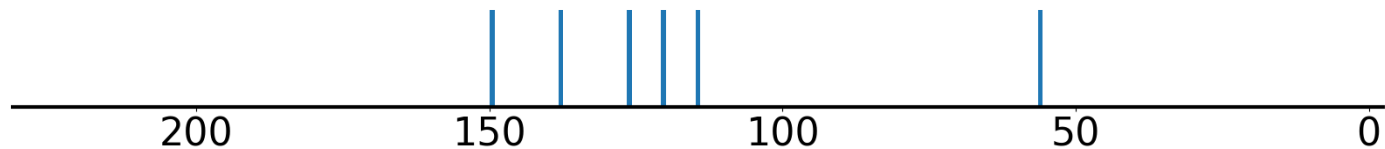

Experimental <sup>1</sup>H NMR (solvent: CDCl<sub>3</sub>)

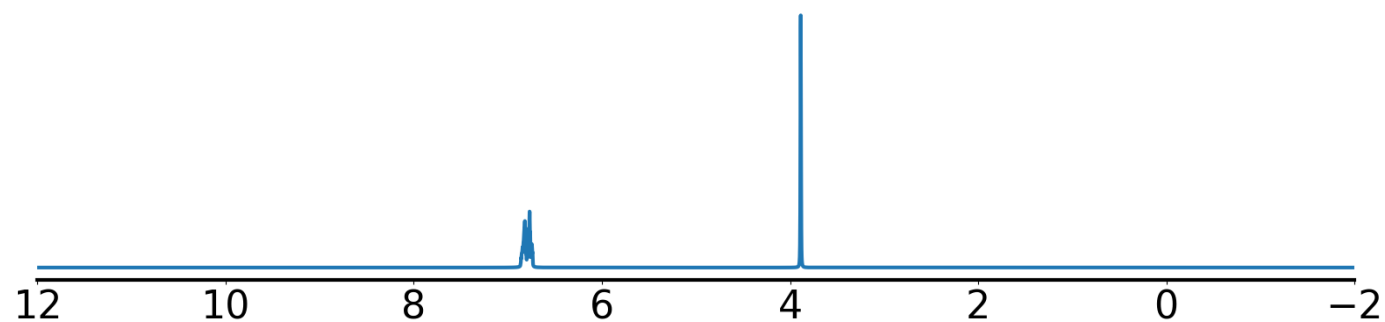

Top predicted structures (loss):

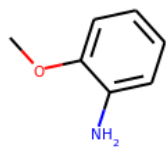

0.017036

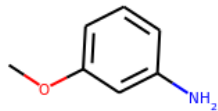

0.02047

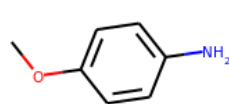

0.022668

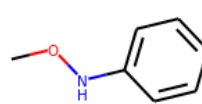

0.022859

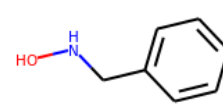

0.024341

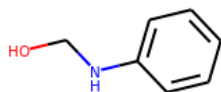

0.027768

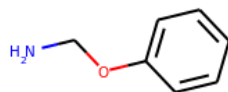

0.027878

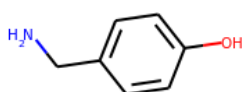

0.032987

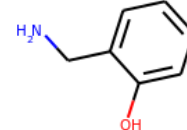

0.034698

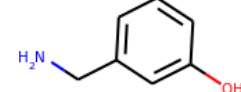

0.035239

| Top predicted substructures      | prob   |                                           |        |
|----------------------------------|--------|-------------------------------------------|--------|
| [#6H1]                           | 0.9979 | [#6X3H1][#6X3H0]                          | 0.9036 |
| [#6X3][#6X3]                     | 0.9911 | [cH][cH]                                  | 0.8995 |
| [cH]                             | 0.9658 | [#6H1][#6H1]                              | 0.8945 |
| [#7][#6][#6X3]                   | 0.9588 | [cX3H1]([cX3H1])[cX3H0]                   | 0.8733 |
| [#6X3][#6X3][#6X3][#6X3]         | 0.9265 | [#7][#6][#6][#6X3]                        | 0.8635 |
| best positives                   | prob   | best negatives                            | prob   |
| [#6H1]                           | 0.9979 | [OX2H1][CX4H1]1[CX4H1][CX4H2][CX4H1]1     | 0.0    |
| [#6X3][#6X3]                     | 0.9911 | [CX4H0]([NX3H1])([CX4H3])([CX4H2])[CX4H1] | 0.0    |
| [cH]                             | 0.9658 | [OX2H0]1[CX4H2][CX4H2][CX4H1][CX4H1]1     | 0.0    |
| [#7][#6][#6X3]                   | 0.9588 | [CX4H0]([OX2H1])([CX4H3])([CX4H2])[CX4H1] | 0.0    |
| [#6X3][#6X3][#6X3][#6X3]         | 0.9265 | [CX4H0]([OX2H0])([CX4H3])([CX4H2])[CX4H1] | 0.0    |
| [#6X3H1][#6X3H0]                 | 0.9036 | [CX4H1]([CX4H3])([CX4H2])[CX4H0]          | 0.0    |
| [cH][cH]                         | 0.8995 | [#6]1[#8][#6][#6]1=[#8]                   | 0.0    |
| [#6H1][#6H1]                     | 0.8945 | [OX2H0]1[CX4H2][CX4H1][CX4H1]1            | 0.0    |
| [cX3H1]([cX3H1])[cX3H0]          | 0.8733 | [CX4H0]([CX4H3])([CX4H2])([CX4H2])[CX3H0] | 0.0    |
| [#7][#6][#6][#6X3]               | 0.8635 | [OX1H0]=[CX3H0]1[CX4H1][CX4H1][CX4H2]1    | 0.0    |
| worst negatives                  | prob   | worst positives                           | prob   |
| [#7X3][#6H2]                     | 0.3931 | [#7H2][#6H0]                              | 0.183  |
| [CHX3](=C)C                      | 0.3794 | [#7X3H2]                                  | 0.3159 |
| [#6X3][#7][#6X3]                 | 0.3564 | [#7][#6H0][#6H1]                          | 0.3398 |
| [#6X3H1][#6X3H1][#6X3H0][#6X3H1] | 0.341  | [#7][#6X3H0][#6X3H1]                      | 0.4599 |
| [#6]1[#6][#6][#6][#7]1           | 0.3371 | [#6]1[#6][#6][#6][#6][#6]1                | 0.5398 |
| [#7X3H1]                         | 0.3174 | [CX4H3]                                   | 0.6248 |
| [#6]1[#6][#6][#6][#6][#7]1       | 0.2989 | [cH]cO                                    | 0.6338 |
| [#7][#6H2]                       | 0.2977 | [#8][#6][#6][#6X3]                        | 0.7336 |
| [#7H][#6X3H1]                    | 0.2636 | [cX3H1]([cX3H1])[cX3H1]                   | 0.7413 |
| [#6H1r5][#7]                     | 0.2606 | [#8][#6H0][#6H1]                          | 0.7598 |

---

Example 21 true smiles: CCCCC=CC(=O)O formula: C8H14O2  
Index of correct structure: 0 of 28834  
True structure loss: 0.008703  
True structure:

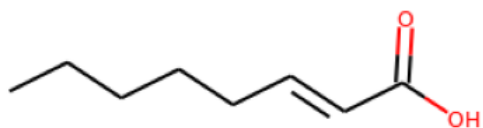

Experimental <sup>13</sup>C NMR (solvent: CDCl<sub>3</sub>)

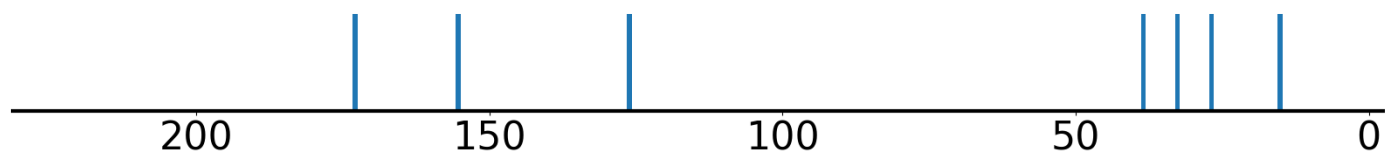

Experimental <sup>1</sup>H NMR (solvent: D<sub>2</sub>O)

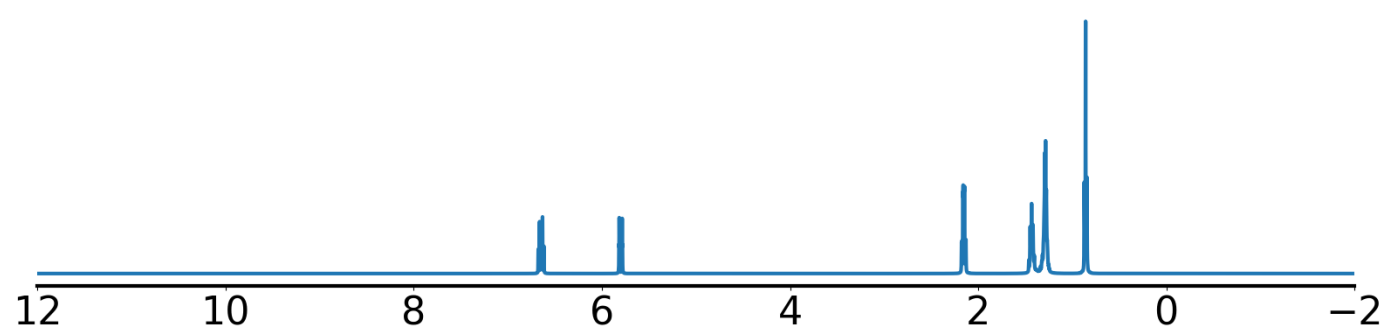

Top predicted structures (loss):

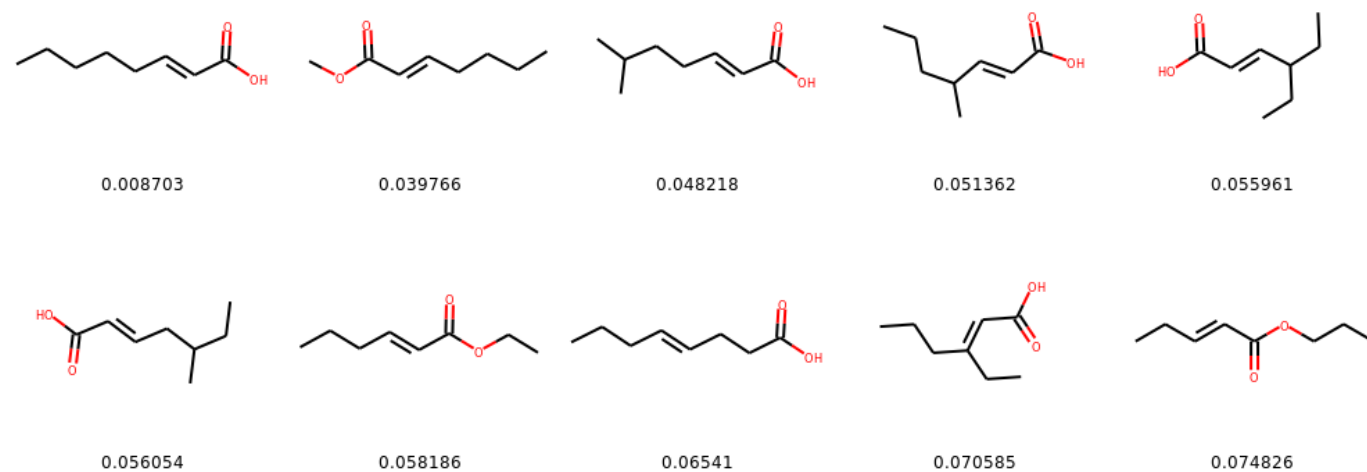

|                                   |        |                                   |        |
|-----------------------------------|--------|-----------------------------------|--------|
| Top predicted substructures       | prob   |                                   |        |
| [CX4H2]([#6])[#6]                 | 1.0    | [CX4H3][#6]                       | 0.9991 |
| [CX4H3]                           | 0.9998 | O=[#6][#6]=[#6X3]                 | 0.9989 |
| [CX4H3][CX4H2]                    | 0.9997 | [CHX3](=C)C                       | 0.9975 |
| [#6H3][#6][#6]                    | 0.9995 | [#8]=[#6][#8]                     | 0.9975 |
| [#6H1]                            | 0.9994 | [CX3](=[OX1])O                    | 0.996  |
| best positives                    | prob   | best negatives                    | prob   |
| [CX4H2]([#6])[#6]                 | 1.0    | [CX2H0](#[CX2H1])[CX3H0]          | 0.0    |
| [CX4H3]                           | 0.9998 | [CX2H0](#[CX2H1])[CX4H1]          | 0.0    |
| [CX4H3][CX4H2]                    | 0.9997 | CC#CCC#C                          | 0.0    |
| [#6H3][#6][#6]                    | 0.9995 | [CX2H0](#[CX2H1])[CX4H0]          | 0.0    |
| [#6H1]                            | 0.9994 | [#6X2][#6H1][#6X2]                | 0.0    |
| [CX4H3][#6]                       | 0.9991 | [CX2H0](#[CX2H0])[CX2H0]          | 0.0    |
| O=[#6][#6]=[#6X3]                 | 0.9989 | [CX2H0](#[CX2H0])[CX4H0]          | 0.0    |
| [CHX3](=C)C                       | 0.9975 | [CX2H0](#[CX2H1])[CX4H2]          | 0.0    |
| [#8]=[#6][#8]                     | 0.9975 | [CX3H0](=[CX3H1])([OX2H0])[CX2H0] | 0.0    |
| [CX3](=[OX1])O                    | 0.996  | [#7][#6H1][#6X2]                  | 0.0    |
| worst negatives                   | prob   | worst positives                   | prob   |
| [#6X3][#6][#6][#6H3]              | 0.5747 | CCCCC                             | 0.5444 |
| [#8][#6][#6H2]                    | 0.3697 | [CX4H2][CX4H2][CX4H2][CX4H2]      | 0.5653 |
| [CX4H2]CC=O                       | 0.3541 | [CX4H2][CX3H]                     | 0.6269 |
| [CX4H2]([CX4H2])[CX3H0]           | 0.33   | [#8][#6H0][#6H1]                  | 0.6786 |
| OCC[CH2]                          | 0.2329 | [#8][#6][#6]=[#6X3]               | 0.7211 |
| [CX4H2][CX3]=O                    | 0.1889 | [CX4H2]([CX4H2])[CX4H2]           | 0.7384 |
| [#6H3][#6][#6X3]                  | 0.1584 | [CX4H2]([CX4H2])[CX3H1]           | 0.8075 |
| [OX1H0]=[CX3H0]([#8])[CX4H2]      | 0.1566 | CCCCC=C                           | 0.8152 |
| [CX3H0](=[OX1H0])([OX2H1])[CX3H0] | 0.0917 | [#8]=[#6H0][#6H1]                 | 0.8167 |
| [CX4H3][CX4H1]                    | 0.0723 | [#6H1][#6H2]                      | 0.823  |

---

Example 22 true smiles: CCCCC=CC(=O)O formula: C8H14O2  
Index of correct structure: 0 of 28834  
True structure loss: 0.008863  
True structure:



Experimental <sup>13</sup>C NMR (solvent: CDCl<sub>3</sub>)

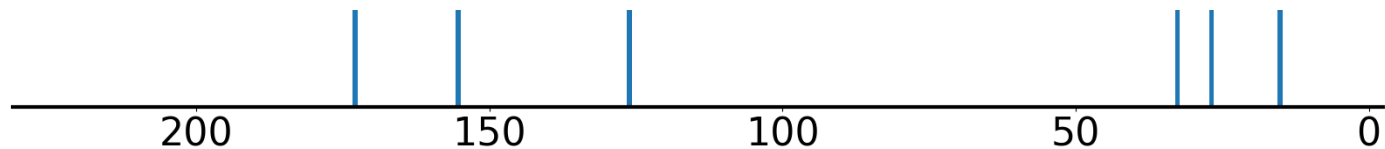

Experimental <sup>1</sup>H NMR (solvent: d<sub>2</sub>o)

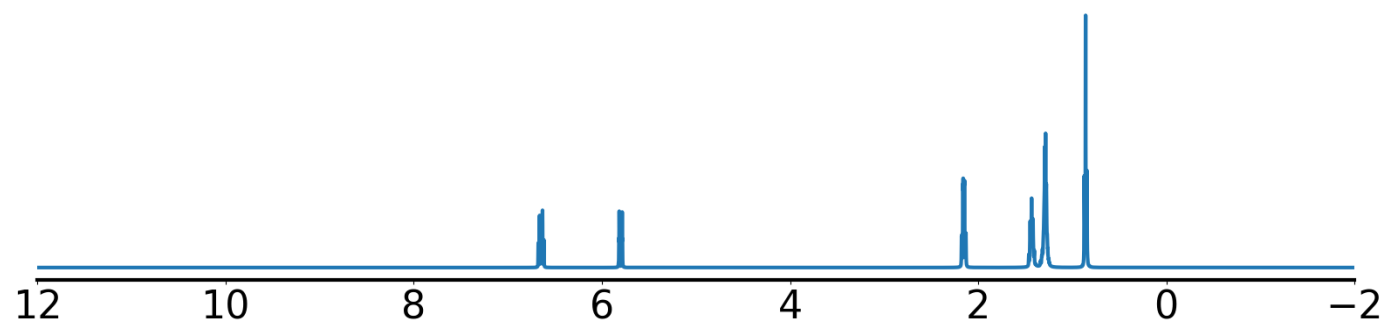

Top predicted structures (loss):

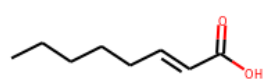

0.008863

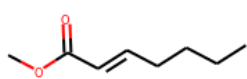

0.035556

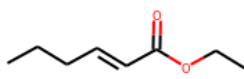

0.048876

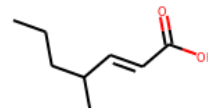

0.053914

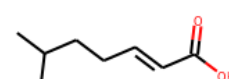

0.055939

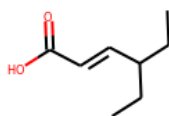

0.056741

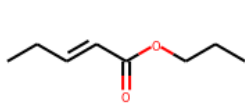

0.063285

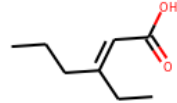

0.066027

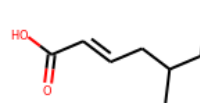

0.067133

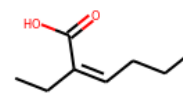

0.078098

|                                   |        |                              |        |
|-----------------------------------|--------|------------------------------|--------|
| Top predicted substructures       | prob   |                              |        |
| [CX4H2]([#6])[#6]                 | 1.0    | [#6H1]                       | 0.9993 |
| [CX4H3][CX4H2]                    | 0.9999 | O=[#6][#6]=[#6X3]            | 0.9991 |
| [CX4H3]                           | 0.9999 | [CHX3](=C)C                  | 0.9983 |
| [CX4H3][#6]                       | 0.9995 | [#8]=[#6][#6H1]=[#6H1]       | 0.9977 |
| [#6H3][#6][#6]                    | 0.9995 | [#6X3][#6X3]                 | 0.9963 |
| best positives                    | prob   | best negatives               | prob   |
| [CX4H2]([#6])[#6]                 | 1.0    | [#6X2][#6H1][#6X2]           | 0.0    |
| [CX4H3][CX4H2]                    | 0.9999 | CC#CCC#C                     | 0.0    |
| [CX4H3]                           | 0.9999 | [#7][#6H1][#6X2]             | 0.0    |
| [CX4H3][#6]                       | 0.9995 | [CX2H0](#[CX2H0])[CX2H0]     | 0.0    |
| [#6H3][#6][#6]                    | 0.9995 | [CX2H0](#[CX2H1])[CX4H1]     | 0.0    |
| [#6H1]                            | 0.9993 | [CX2H0](#[CX2H1])[CX3H0]     | 0.0    |
| O=[#6][#6]=[#6X3]                 | 0.9991 | [CX2H0](#[CX2H1])[CX4H0]     | 0.0    |
| [CHX3](=C)C                       | 0.9983 | [CX2H0](#[CX2H0])[CX4H0]     | 0.0    |
| [#8]=[#6][#6H1]=[#6H1]            | 0.9977 | [CX2H0](#[CX2H1])[CX4H2]     | 0.0    |
| [#6X3][#6X3]                      | 0.9963 | [#6H2][#6][#6X2]             | 0.0    |
| worst negatives                   | prob   | worst positives              | prob   |
| [#6X3][#6][#6][#6H3]              | 0.5245 | CCCCC                        | 0.2862 |
| [#8][#6][#6H2]                    | 0.2748 | [CX4H2][CX4H2][CX4H2][CX4H2] | 0.5175 |
| [CX4H2]CC=O                       | 0.2187 | [CX4H2][CX3H]                | 0.544  |
| OCC[CH2]                          | 0.2143 | CCCCC=C                      | 0.5958 |
| [#6H3][#6][#6X3]                  | 0.2035 | [CX4H2]([CX4H2])[CX4H2]      | 0.6958 |
| [CX4H2]([CX4H2])[CX3H0]           | 0.1177 | [#6H1][#6H2]                 | 0.746  |
| [CX3H0](=[OX1H0])([OX2H1])[CX3H0] | 0.1001 | [CX4H2]([CX4H2])[CX3H1]      | 0.7582 |
| [CX3H0](=[OX1H0])([OX2H0])[CX3H1] | 0.0912 | [#8][#6H0][#6H1]             | 0.7866 |
| [#6H1][#6H1]                      | 0.0748 | [#8][#6][#6]=[#6X3]          | 0.8162 |
| [CX4H3][CX4H1]                    | 0.0585 | [CHX3]=[CHX3]                | 0.8426 |

---

Example 23 true smiles: NCC(=O)CCC(=O)O formula: C5H9NO3  
Index of correct structure: 0 of 27953  
True structure loss: 0.019908  
True structure:

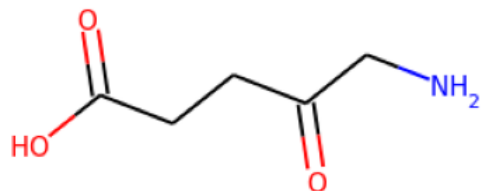

Experimental <sup>13</sup>C NMR (solvent: D2O)

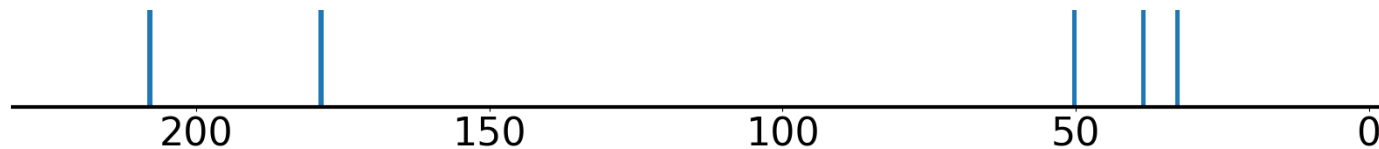

Experimental <sup>1</sup>H NMR (solvent: D2O)

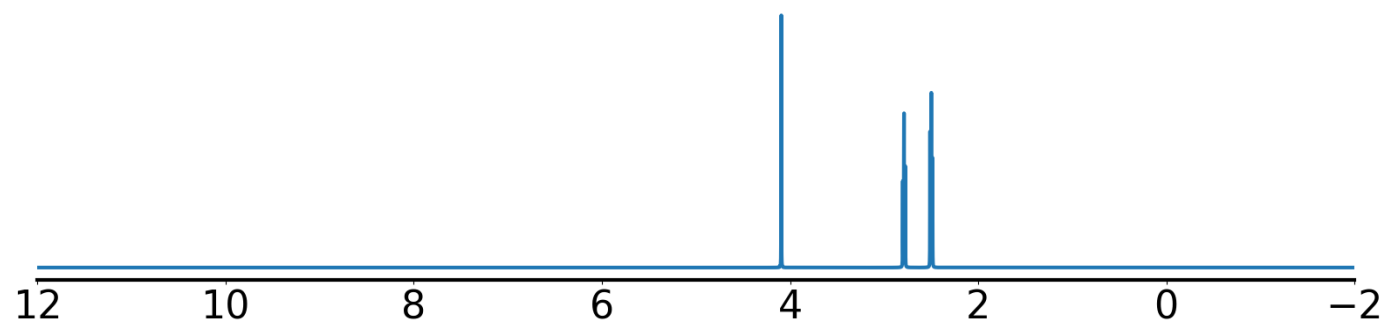

Top predicted structures (loss):

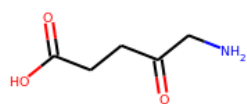

0.019908

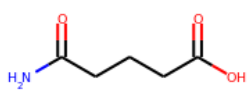

0.034361

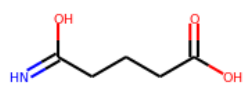

0.040346

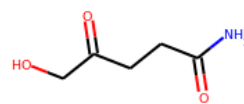

0.041791

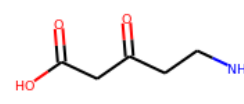

0.043131

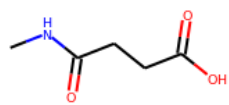

0.044076

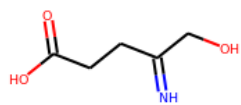

0.045778

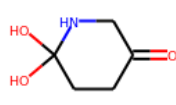

0.048403

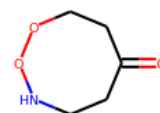

0.048685

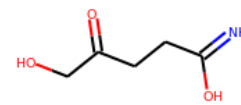

0.049151



|                                  |        |                                |        |
|----------------------------------|--------|--------------------------------|--------|
| Top predicted substructures      | prob   |                                |        |
| [CX3](=[OX1])C                   | 1.0    | [CX4H2][CX3]=O                 | 0.988  |
| [CX4H2]([#6])[#6]                | 0.9997 | [OX2H1]                        | 0.9756 |
| [CX4H2]([CX4H2])[CX3H0]          | 0.9985 | [#7X3][#6H2]                   | 0.9679 |
| O=[CX3H0][CX4H2][CX4H2]          | 0.9963 | [CX4H2]CC=O                    | 0.9206 |
| [OX1H0]=[CX3H0]([#6])[CX4H2]     | 0.9962 | [#7][#6H2]                     | 0.9169 |
| best positives                   | prob   | best negatives                 | prob   |
| [CX3](=[OX1])C                   | 1.0    | CC=CCC#C                       | 0.0    |
| [CX4H2]([#6])[#6]                | 0.9997 | CC=CC#CC                       | 0.0    |
| [CX4H2]([CX4H2])[CX3H0]          | 0.9985 | C=CC=CC#C                      | 0.0    |
| O=[CX3H0][CX4H2][CX4H2]          | 0.9963 | [CX2H1]#[CX2H0][CX3H1]=[CX3H0] | 0.0    |
| [OX1H0]=[CX3H0]([#6])[CX4H2]     | 0.9962 | [#6X2][#6H1][#6X2]             | 0.0    |
| [CX4H2][CX3]=O                   | 0.988  | C=CCC#C                        | 0.0    |
| [OX2H1]                          | 0.9756 | [CX2H0]([#CX2H0])[CX2H0]       | 0.0    |
| [#7X3][#6H2]                     | 0.9679 | [CX2H0]([#CX2H1])[CX3H0]       | 0.0    |
| [CX4H2]CC=O                      | 0.9206 | [CX2H0]([#CX2H1])[CX4H2]       | 0.0    |
| [#7][#6H2]                       | 0.9169 | CCC#CC#C                       | 0.0    |
| worst negatives                  | prob   | worst positives                | prob   |
| [#7][#6H2][#6H2]                 | 0.6196 | [CX4H2]([NX3H2])[CX3H0]        | 0.0503 |
| [#7X3H1]                         | 0.4542 | [#7H2][#6H2]                   | 0.1256 |
| [CX4H2]([NX3H1])[CX4H2]          | 0.3455 | [#8][#6][#6H2]                 | 0.359  |
| [#7][#6][#6][#6X3]               | 0.3301 | [#6X3][#6H2][#7]               | 0.3748 |
| [CX3H0]([OX1H0])([NX3H1])[CX4H2] | 0.2928 | [#8][#6][#6][#6][#6]=[#8]      | 0.4503 |
| [OX2H1][CX4H2][#6X3H0]           | 0.2697 | [#8]=[#6][#6][#6][#6]=[#8]     | 0.6313 |
| [#7H2][#6H0]                     | 0.2321 | [#7][#6][#6X3]                 | 0.6397 |
| [#8]=[#6][#6H2][#8]              | 0.2189 | [#7X3H2]                       | 0.7007 |
| [CX4H2]([#6])[O]                 | 0.211  | [OX1H0]=[CX3H0]([#8])[CX4H2]   | 0.7035 |
| [#6H2][#7][#6X3]                 | 0.1922 | [#6X3H0][CX4H2][CX4H2][#6X3H0] | 0.7186 |

---

Example 24 true smiles: O=C(O)C1CC(O)CN1 formula: C5H9NO3  
 Index of correct structure: 0 of 27953  
 True structure loss: 0.032393  
 True structure:

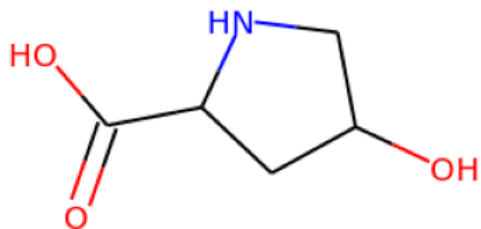

Experimental <sup>13</sup>C NMR (solvent: D2O)

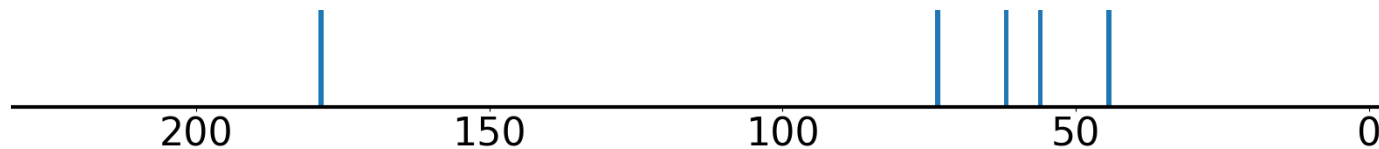

Experimental <sup>1</sup>H NMR (solvent: D2O)

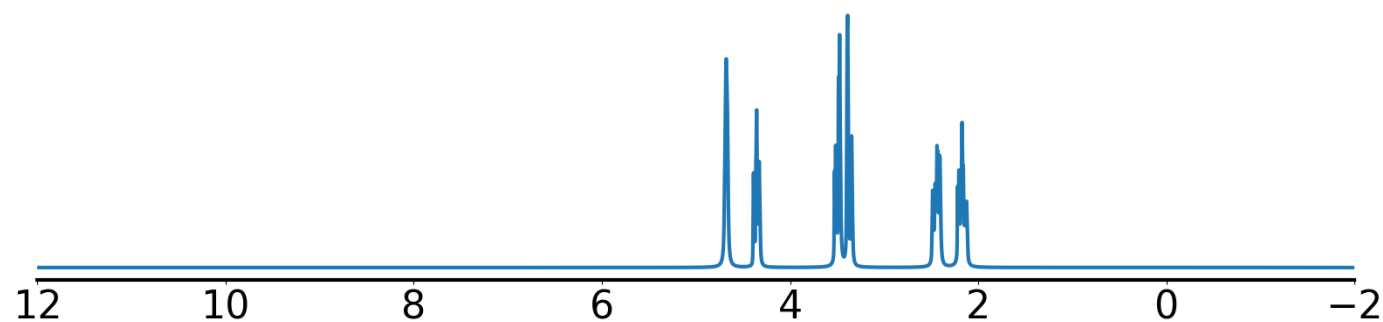

Top predicted structures (loss):

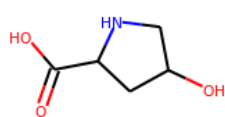

0.032393

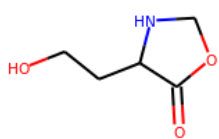

0.035936

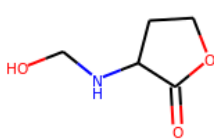

0.041696

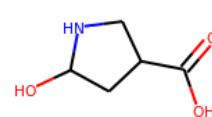

0.042455

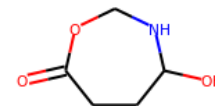

0.043932

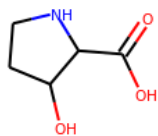

0.048112

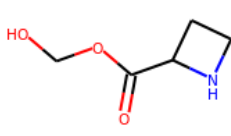

0.048123

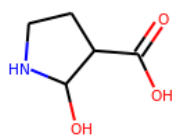

0.04834

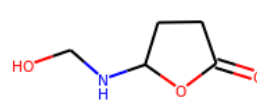

0.048575

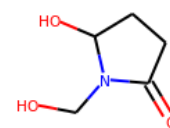

0.050339

| Top predicted substructures      | prob   |                                           |        |
|----------------------------------|--------|-------------------------------------------|--------|
| [#6H1]                           | 0.9989 | [#6H1][#6H2]                              | 0.9335 |
| [CX4H2]([#6])[#6]                | 0.9987 | [OX2H1]                                   | 0.922  |
| [CX3](=[OX1])C                   | 0.9942 | [#8]=[#6H0][#6H1]                         | 0.8957 |
| [#8]=[#6][#8]                    | 0.9446 | OCC[CH2]                                  | 0.8849 |
| [#7X3][#6H2]                     | 0.9414 | [CX3](=[OX1])O                            | 0.8714 |
| <br>                             |        |                                           |        |
| best positives                   | prob   | best negatives                            | prob   |
| [#6H1]                           | 0.9989 | [CX2H1]#[CX2H0][CX3H1]=[CX3H0]            | 0.0    |
| [CX4H2]([#6])[#6]                | 0.9987 | [CX3H0](=[CX3H2])([CX4H3])[CX4H2]         | 0.0    |
| [CX3](=[OX1])C                   | 0.9942 | [CX3H0](=[CX3H1])([CX4H2])[CX2H0]         | 0.0    |
| [#8]=[#6][#8]                    | 0.9446 | [#6H3][#6X3][#6X3]=[#6X3H2]               | 0.0    |
| [#7X3][#6H2]                     | 0.9414 | C=CC=CC#C                                 | 0.0    |
| [#6H1][#6H2]                     | 0.9335 | [CX4H0]([CX4H2])([CX4H2])([CX4H1])[CX4H1] | 0.0    |
| [OX2H1]                          | 0.922  | [#6H3][#6H1][#6H1]=[#7]                   | 0.0    |
| [#8]=[#6H0][#6H1]                | 0.8957 | [CX3H0](=[CX3H0])([CX4H3])[CX4H2]         | 0.0    |
| OCC[CH2]                         | 0.8849 | [CX2H0]([CX2H0])[CX3H0]                   | 0.0    |
| [CX3](=[OX1])O                   | 0.8714 | [#6X3][#6]#[#6][#6H3]                     | 0.0    |
| <br>                             |        |                                           |        |
| worst negatives                  | prob   | worst positives                           | prob   |
| [#8][#6][#6][#6X3]               | 0.5012 | [CX4H2]([NX3H1])[CX4H1]                   | 0.164  |
| [CX4H2]([CX4H2])[CX4H1]          | 0.4633 | [#6H1]([#6H2])[#6H2]                      | 0.2168 |
| [CX4H2]([#6])[O]                 | 0.4506 | [#7][#6H2][#6H1]                          | 0.2253 |
| [CX4H2][CX4H2]                   | 0.4158 | [CX3](=O)[OX2H1]                          | 0.2954 |
| [#7X3H2]                         | 0.4148 | [CX4H2]([CH])[CH]                         | 0.3104 |
| [CX4H2][CX3]=O                   | 0.3846 | [CX4H1]([OX2H1])([CX4H2])[CX4H2]          | 0.3143 |
| [#8][#6H1][#6H1]                 | 0.3578 | [#6H1][#6H2][#6][#6][#7]                  | 0.3234 |
| [#7H2][#6H1]                     | 0.3093 | [#8][#6][#6][#6][#6][#8]                  | 0.3521 |
| [#7][#6][#6][#6X3]               | 0.2444 | [#6]1[#6][#6][#6][#7]1                    | 0.3717 |
| [CX4H1]([NX3H2])([CX4H2])[CX3H0] | 0.2364 | [#7X3H1]                                  | 0.3754 |

---

Example 25 true smiles: O=C(O)C1CC(O)CN1 formula: C5H9NO3  
 Index of correct structure: 0 of 27953  
 True structure loss: 0.032454  
 True structure:

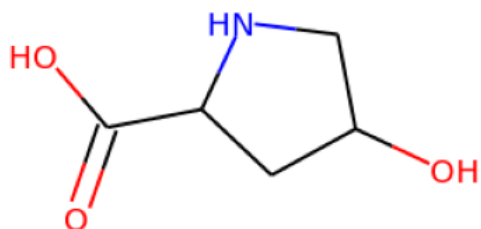

Experimental <sup>13</sup>C NMR (solvent: D2O)

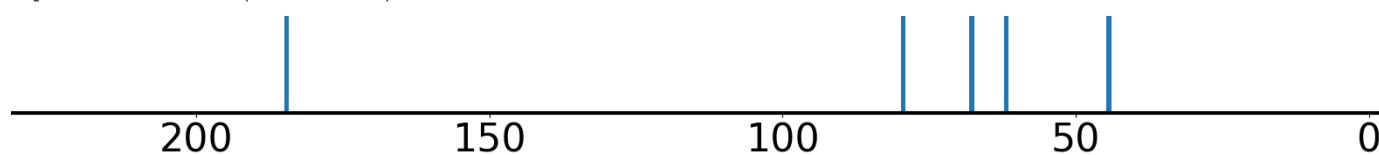

Experimental <sup>1</sup>H NMR (solvent: D2O)

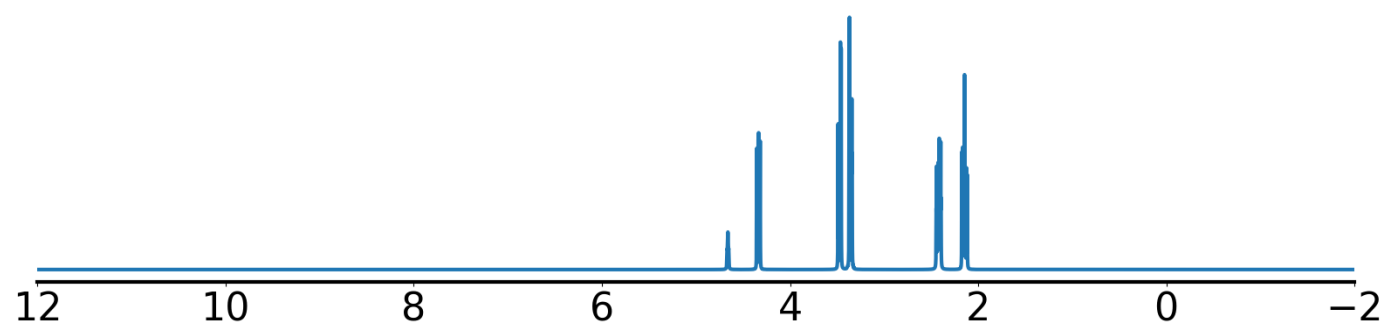

Top predicted structures (loss):

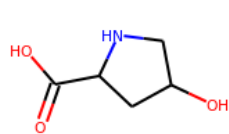

0.032454

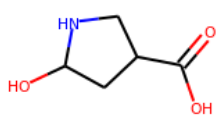

0.039223

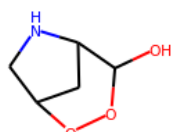

0.042535

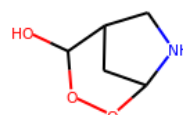

0.047224

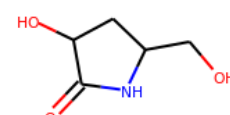

0.052116

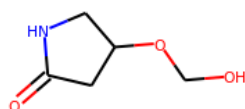

0.053022

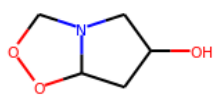

0.053465

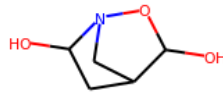

0.053893

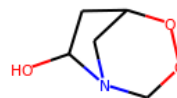

0.05523

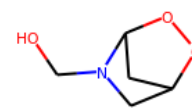

0.056236

|                                        |        |                                        |        |
|----------------------------------------|--------|----------------------------------------|--------|
| Top predicted substructures            | prob   |                                        |        |
| [#6H1]                                 | 0.9954 | [CX4H]O                                | 0.9004 |
| [CX3](=[OX1])C                         | 0.9942 | O[CX4H][CX4H2]                         | 0.8361 |
| [CX4H2]([#6])[#6]                      | 0.9744 | [#8][#6][#6H2]                         | 0.8266 |
| [OX2H1]                                | 0.9694 | OCC[CH2]                               | 0.7816 |
| [#6H1][#6H2]                           | 0.96   | [#8]=[#6][#8]                          | 0.7606 |
| best positives                         | prob   | best negatives                         | prob   |
| [#6H1]                                 | 0.9954 | [CX3H0](=[CX3H2])([CX4H3])[CX4H2]      | 0.0    |
| [CX3](=[OX1])C                         | 0.9942 | [CX3H0](=[CX3H1])([CX4H3])[CX3H1]      | 0.0    |
| [CX4H2]([#6])[#6]                      | 0.9744 | CC=CC#CC                               | 0.0    |
| [OX2H1]                                | 0.9694 | [CX2H1]#[CX2H0][CX3H1]=[CX3H0]         | 0.0    |
| [#6H1][#6H2]                           | 0.96   | [#6H3][#6X3][#6X3]=[#6X3H2]            | 0.0    |
| [CX4H]O                                | 0.9004 | CCC=CC#C                               | 0.0    |
| O[CX4H][CX4H2]                         | 0.8361 | [CX3H0](=[CX3H0])([CX4H3])[CX4H2]      | 0.0    |
| [#8][#6][#6H2]                         | 0.8266 | [CX3H1](=[CX3H1])[CX2H0]               | 0.0    |
| OCC[CH2]                               | 0.7816 | [CX3H1](=[CX3H2])[CX2H0]               | 0.0    |
| [#8]=[#6][#8]                          | 0.7606 | [CX3H0](=[CX3H1])([OX2H0])[CX2H0]      | 0.0    |
| worst negatives                        | prob   | worst positives                        | prob   |
| [#8][#6H1][#6H1]                       | 0.4266 | [CX3](=O)[OX2H1]                       | 0.14   |
| [#8][#6][#6]=[#8]                      | 0.4079 | [#7H1][#6X4H1][#6X3]                   | 0.2058 |
| [#8][#6][#6][#6X3]                     | 0.3946 | [CX4H2]( [NX3H1] ) [CX4H1]             | 0.2465 |
| [#6H1][#6H1]                           | 0.3882 | [CX3H0](=[OX1H0])([OX2H1])[CX4H1]      | 0.2565 |
| [#7X3H2]                               | 0.3711 | [#8][#6][#6][#6][#6][#8]               | 0.2721 |
| [CX4H2][CX3]=O                         | 0.3122 | [CX4H1]( [OX2H1] ) ( [CX4H2] ) [CX4H2] | 0.3053 |
| [CX4H2]([#6])[O]                       | 0.3048 | [CX4H1]( [NX3H1] ) ( [CX4H2] ) [CX3H0] | 0.3349 |
| [CX4H1]( [OX2H1] ) ( [CX4H2] ) [CX4H1] | 0.2694 | [#6H1r5][#7]                           | 0.3536 |
| [#7][#6][#6][#6X3]                     | 0.2688 | [#8][#6H0][#6H1]                       | 0.3608 |
| O[CX4H]( [CX4H2] ) [CX4H1]             | 0.2429 | [CX3](=[OX1])O                         | 0.4072 |

---

Example 26 true smiles: O=C(O)Cc1ccccc1 formula: C8H8O2  
Index of correct structure: 0 of 26562  
True structure loss: 0.023907  
True structure:

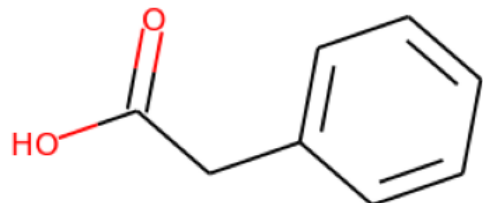

Experimental  $^{13}\text{C}$  NMR (solvent:  $\text{CDCl}_3$ )

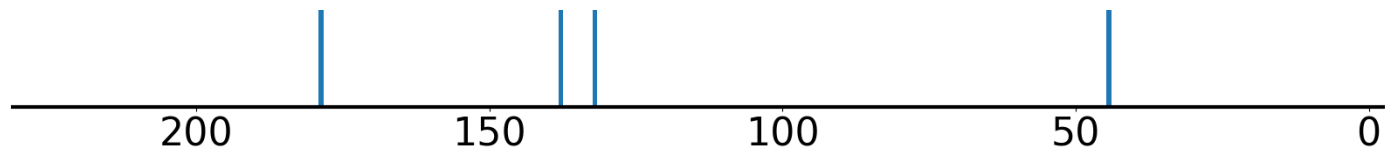

Experimental  $^1\text{H}$  NMR (solvent:  $\text{d}_2\text{o}$ )

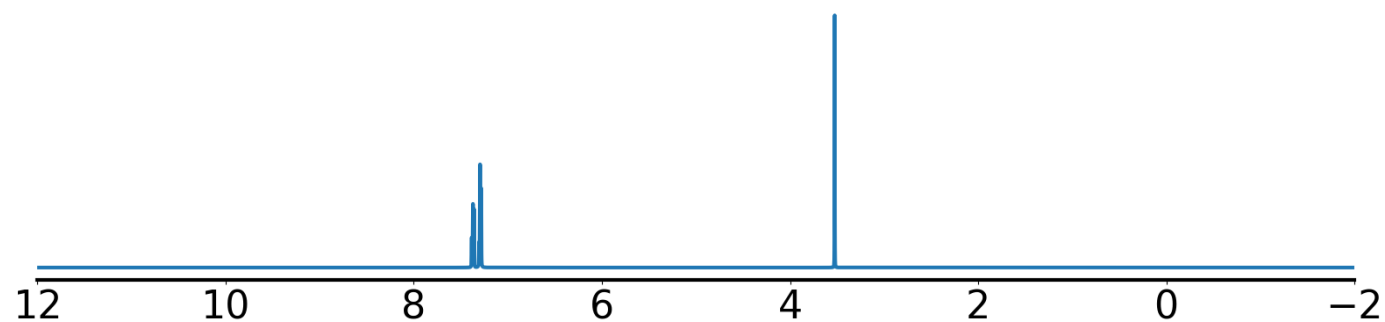

Top predicted structures (loss):

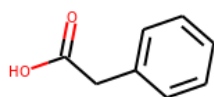

0.023907

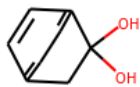

0.042161

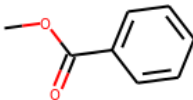

0.046921

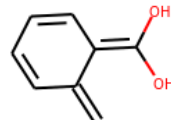

0.054306

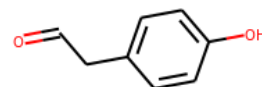

0.054605

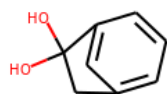

0.055526

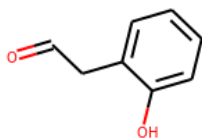

0.058364

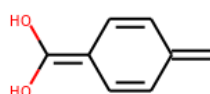

0.058816

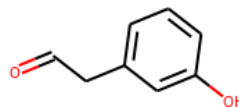

0.059834

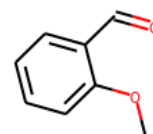

0.060167

| Top predicted substructures    | prob        |                                           | prob        |
|--------------------------------|-------------|-------------------------------------------|-------------|
| [#6H1]                         | 0.9973      | [CX3](=[OX1])C                            | 0.9338      |
| [#6X3][#6H2][#6X3]             | 0.9812      | [#6X3H1][#6X3H0]                          | 0.8959      |
| [#6X3][#6X3]                   | 0.977       | [#8X1]=[#6X3][#6H2][#6H0]                 | 0.8538      |
| O=[#6][#6][#6X3]               | 0.9614      | [#6X3][#6X3][#6X3][#6X3]                  | 0.7715      |
| [CX4H2]([#6])[#6]              | 0.9439      | [#8]=[#6][#8]                             | 0.757       |
| <b>best positives</b>          | <b>prob</b> | <b>best negatives</b>                     | <b>prob</b> |
| [#6H1]                         | 0.9973      | [CX4H1]([NX3H2])([CX4H3])[CX4H1]          | 0.0         |
| [#6X3][#6H2][#6X3]             | 0.9812      | [CX4H0]([NX3H1])([CX4H3])([CX4H2])[CX4H1] | 0.0         |
| [#6X3][#6X3]                   | 0.977       | [#6H3][#6H1][#7][#7]                      | 0.0         |
| O=[#6][#6][#6X3]               | 0.9614      | [CX4H1]([OX2H1])([CX4H3])[CX4H0]          | 0.0         |
| [CX4H2]([#6])[#6]              | 0.9439      | [#8][#6H2][#6H2][#6X2]                    | 0.0         |
| [CX3](=[OX1])C                 | 0.9338      | [CX4H1]([NX3H2])([CX4H2])[CX4H0]          | 0.0         |
| [#6X3H1][#6X3H0]               | 0.8959      | [CX4H2]([NX2H0])[CX4H1]                   | 0.0         |
| [#8X1]=[#6X3][#6H2][#6H0]      | 0.8538      | [CX4H1]([NX3H0])([CX4H3])[CX4H1]          | 0.0         |
| [#6X3][#6X3][#6X3][#6X3]       | 0.7715      | [CX4H2]([NX3H1])[CX4H3]                   | 0.0         |
| [#8]=[#6][#8]                  | 0.757       | [CX4H1]([NX3H1])([CX4H3])[CX4H2]          | 0.0         |
| <b>worst negatives</b>         | <b>prob</b> | <b>worst positives</b>                    | <b>prob</b> |
| [CHX3](=C)C                    | 0.3903      | [#6]1[#6][#6][#6][#6]1                    | 0.1447      |
| [CHX3]=[CHX3]                  | 0.3433      | [#6X3H1][#6X3H1][#6X3H0][#6X3H1]          | 0.1576      |
| [#6X3][#6X3]=[#6X3][#6X3]      | 0.3093      | [CX3H0](=[OX1H0])([OX2H1])[CX4H2]         | 0.1624      |
| [#8]=[#6H0][#6H1]              | 0.2914      | [cX3H1]([cX3H1])[cX3H1]                   | 0.1718      |
| O=[#6][#6]=[#6X3]              | 0.2842      | [OX2H1]                                   | 0.315       |
| [OX1H0]=[CX3H0][CX4H2][CX3H0]  | 0.2613      | [#8][#6][#6H2]                            | 0.3455      |
| [CX4H2]([CX3H0])[CX3H0]        | 0.2419      | [CX3](=O)[OX2H1]                          | 0.4395      |
| [CX3H1]([CX3H1])[CX3H0]        | 0.2409      | [cH][cH]                                  | 0.4548      |
| [#6H1][#6H2]                   | 0.2295      | [cX3H1]([cX3H1])[cX3H0]                   | 0.5049      |
| [OX1H0]=[CX3H0][CX3H1]=[CX3H1] | 0.2126      | [#6H1][#6H1]                              | 0.6281      |

---

Example 27 true smiles: O=C(O)CCCC(=O)O formula: C6H10O4  
Index of correct structure: 0 of 19323  
True structure loss: 0.011026  
True structure:

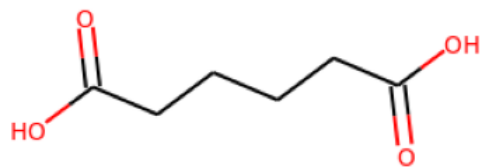

Experimental <sup>13</sup>C NMR (solvent: DMSO)

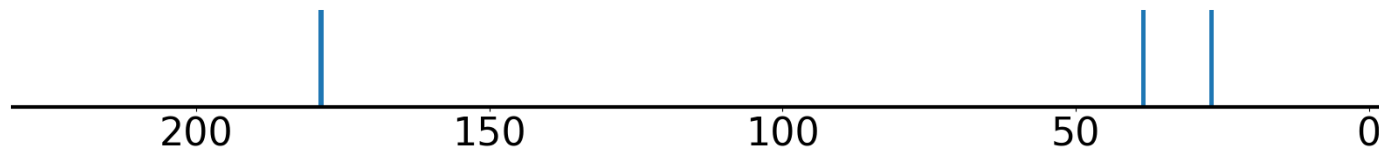

Experimental <sup>1</sup>H NMR (solvent: d2o)

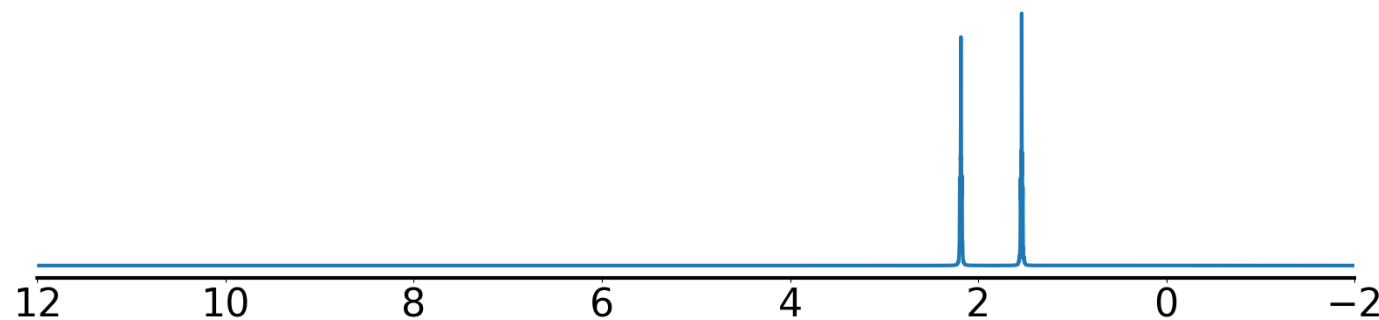

Top predicted structures (loss):

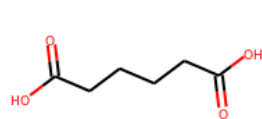

0.011026

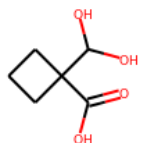

0.035414

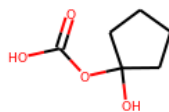

0.039191

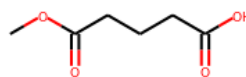

0.040383

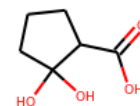

0.050711

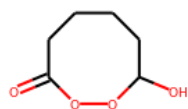

0.053052

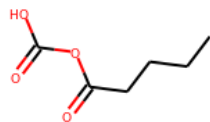

0.05349

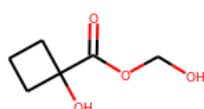

0.054585

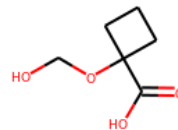

0.054696

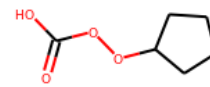

0.058132



|                                   |        |                                   |        |
|-----------------------------------|--------|-----------------------------------|--------|
| Top predicted substructures       | prob   |                                   |        |
| [#8]=[#6][#8]                     | 0.9997 | [OX2H1]                           | 0.9961 |
| [CX3](=[OX1])O                    | 0.9995 | OCC[CH2]                          | 0.9672 |
| [CX3](=[OX1])C                    | 0.9994 | [CX3H0](=[OX1H0])([OX2H1])[CX4H2] | 0.9449 |
| [CX3](=O)[OX2H1]                  | 0.9982 | [OX1H0]=[CX3H0]([#8])[CX4H2]      | 0.8528 |
| [CX4H2]([#6])[#6]                 | 0.9972 | O=[CX3H0][CX4H2][CX4H2]           | 0.7998 |
| best positives                    | prob   | best negatives                    | prob   |
| [#8]=[#6][#8]                     | 0.9997 | [CX2H1]#[CX2H0][CX3H1]=[CX3H0]    | 0.0    |
| [CX3](=[OX1])O                    | 0.9995 | [CX3H0](=[CX3H1])([OX2H0])[CX2H0] | 0.0    |
| [CX3](=[OX1])C                    | 0.9994 | [#7][#6]=[#6][#6]#[#7]            | 0.0    |
| [CX3](=O)[OX2H1]                  | 0.9982 | C=CC=CC#C                         | 0.0    |
| [CX4H2]([#6])[#6]                 | 0.9972 | [CX2H0](#[CX2H1])[CX3H0]          | 0.0    |
| [OX2H1]                           | 0.9961 | CC#CCC=C                          | 0.0    |
| OCC[CH2]                          | 0.9672 | [CX2H0](#[CX2H1])[CX3H1]          | 0.0    |
| [CX3H0](=[OX1H0])([OX2H1])[CX4H2] | 0.9449 | CC=CC#C                           | 0.0    |
| [OX1H0]=[CX3H0]([#8])[CX4H2]      | 0.8528 | [#7][#6]=[#6][#6]#[#7]            | 0.0    |
| O=[CX3H0][CX4H2][CX4H2]           | 0.7998 | [CX3H0](=[CX3H1])([CX4H1])[CX2H0] | 0.0    |
| worst negatives                   | prob   | worst positives                   | prob   |
| [#6H1]                            | 0.5891 | CCCCC                             | 0.3714 |
| [CX3H0](=[OX1H0])([OX2H1])[CX4H1] | 0.5782 | [CX4H2][CX4H2][CX4H2][CX4H2]      | 0.4663 |
| [#8][#6H0][#6H1]                  | 0.5444 | [CX4H2]( [CX4H2] ) [CX3H0]        | 0.5775 |
| [#6H1][#6H2]                      | 0.3208 | [CX4H2]( [CX4H2] ) [CX4H2]        | 0.6523 |
| [#8][#6][#6][#6][#6][#8]          | 0.1871 | [#8][#6][#6H2]                    | 0.7061 |
| [#8]=[#6H0][#6H1]                 | 0.1718 | [CX4H2]CC=O                       | 0.7156 |
| O=[CX3][CX4H]                     | 0.1504 | [CX4H2][CX4H2]                    | 0.7204 |
| [#8]=[#6][#6H2][#6H1]             | 0.1349 | [CX4H2][CX3]=O                    | 0.775  |
| [#8][#6][#6][#8]                  | 0.1309 | O=[CX3H0][CX4H2][CX4H2]           | 0.7998 |
| O=[CX3H0][CX4H2][CX4H1]           | 0.1186 | [OX1H0]=[CX3H0]([#8])[CX4H2]      | 0.8528 |

---

Example 28 true smiles: CC(CC(=O)O)CC(=O)O formula: C6H10O4  
 Index of correct structure: 0 of 19323  
 True structure loss: 0.027036  
 True structure:

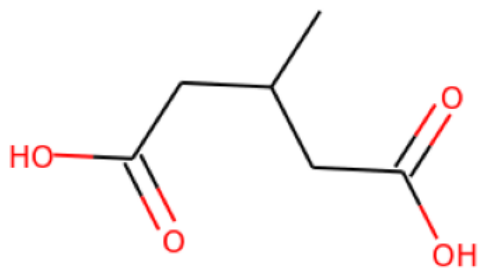

Experimental <sup>13</sup>C NMR (solvent: CDCl<sub>3</sub>)

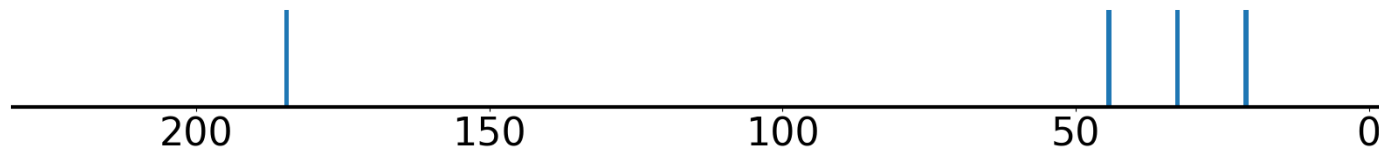

Experimental <sup>1</sup>H NMR (solvent: D<sub>2</sub>O)

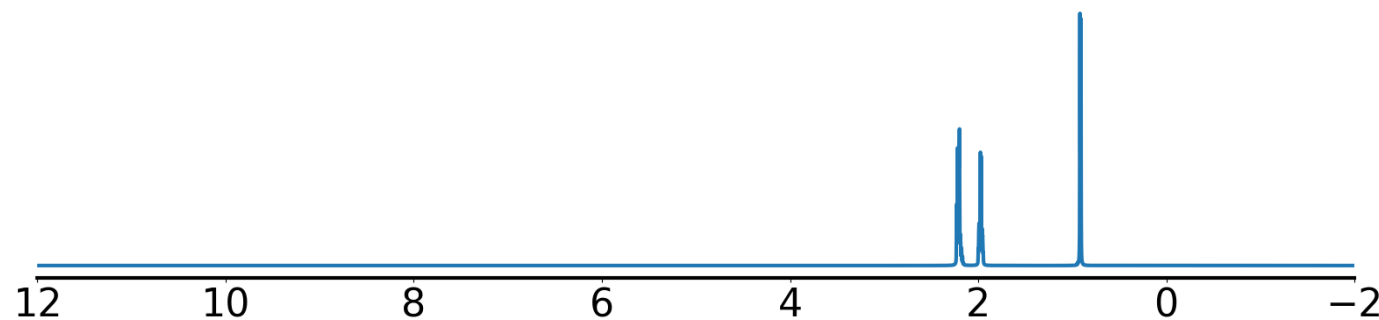

Top predicted structures (loss):

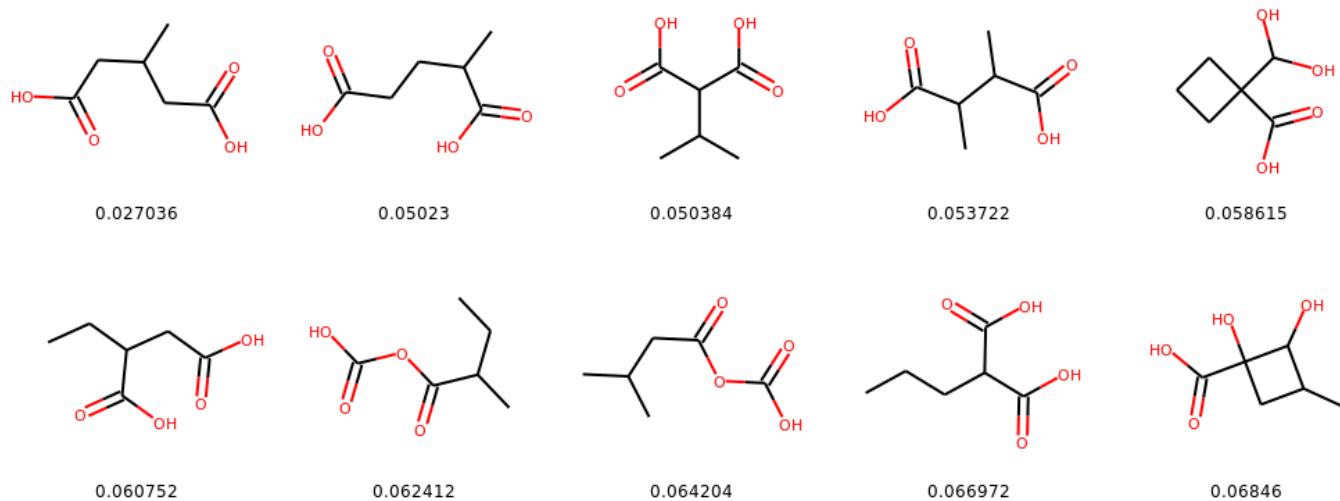

|                                   |        |                                  |        |
|-----------------------------------|--------|----------------------------------|--------|
| Top predicted substructures       | prob   |                                  |        |
| [OX2H1]                           | 0.9997 | [#6H3][#6][#6]                   | 0.9977 |
| [#8]=[#6][#8]                     | 0.9996 | [#6H1]                           | 0.9973 |
| [CX3](=[OX1])C                    | 0.9993 | [CX4H2]([#6])[#6]                | 0.9785 |
| [CX3](=O)[OX2H1]                  | 0.9991 | [CX4H3]                          | 0.9692 |
| [CX3](=[OX1])O                    | 0.9989 | [#8][#6H0][#6H1]                 | 0.8976 |
| best positives                    | prob   | best negatives                   | prob   |
| [OX2H1]                           | 0.9997 | [CX2H1]#[CX2H0][CX3H1]=[CX3H0]   | 0.0    |
| [#8]=[#6][#8]                     | 0.9996 | CCC=CC#C                         | 0.0    |
| [CX3](=[OX1])C                    | 0.9993 | CC#CCC=C                         | 0.0    |
| [CX3](=O)[OX2H1]                  | 0.9991 | CC=CC#CC                         | 0.0    |
| [CX3](=[OX1])O                    | 0.9989 | [CX2H0]([#CX2H1])[CX3H1]         | 0.0    |
| [#6H3][#6][#6]                    | 0.9977 | [CX3H1]([#CX3H1])[CX2H0]         | 0.0    |
| [#6H1]                            | 0.9973 | [#7][#6]=[#6][#6][#6]=[#7]       | 0.0    |
| [CX4H2]([#6])[#6]                 | 0.9785 | C=CC=CC#C                        | 0.0    |
| [CX4H3]                           | 0.9692 | [CX2H0]([#CX2H1])[CX4H0]         | 0.0    |
| [CX4H3][#6]                       | 0.8892 | CCC#CC=C                         | 0.0    |
| worst negatives                   | prob   | worst positives                  | prob   |
| [#8][#6H0][#6H1]                  | 0.8976 | [#6H1]([#6H2])[#6H2]             | 0.0805 |
| [CX3H0]([#OX1H0])([OX2H1])[CX4H1] | 0.8575 | [CX4H2]([CX4H1])[CX3H0]          | 0.1352 |
| OCC[CH2]                          | 0.7204 | [#8]=[#6][#6H2][#6H1]            | 0.2174 |
| [#6H1][#6H1]                      | 0.5838 | [CX4H1]([CX4H3])([CX4H2])[CX4H2] | 0.2215 |
| [CX4H2]CC=O                       | 0.5367 | [OX1H0]=[CX3H0]([#8])[CX4H2]     | 0.2762 |
| O=[CX3][CX4H]                     | 0.5217 | O=[CX3H0][CX4H2][CX4H1]          | 0.3053 |
| [CH3]CC[OH]                       | 0.4633 | [CX4H2][CX3]=O                   | 0.4156 |
| [#8]=[#6H0][#6H1]                 | 0.4464 | [#8][#6][#6H2]                   | 0.4676 |
| [#8]=[#6][#6H1][#6H1]             | 0.2848 | [CHX4]([CH3X4])[CH2X4]           | 0.6297 |
| [#8][#6][#6][#6][#6]=[#8]         | 0.2233 | [#6X3][#6][#6][#6H3]             | 0.7351 |

---

Example 29 true smiles: COC(=O)CCCC(=O)O formula: C6H10O4  
 Index of correct structure: 0 of 19323  
 True structure loss: 0.011848  
 True structure:

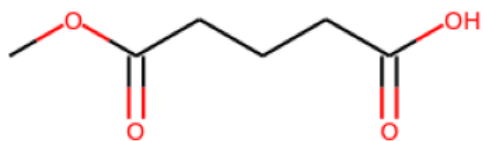

Experimental <sup>13</sup>C NMR (solvent: CDCl<sub>3</sub>)

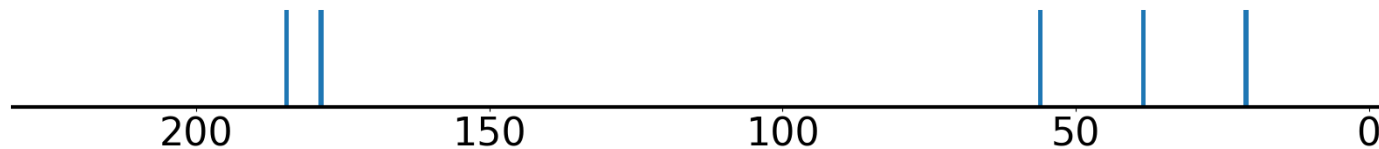

Experimental <sup>1</sup>H NMR (solvent: d<sub>2</sub>O)

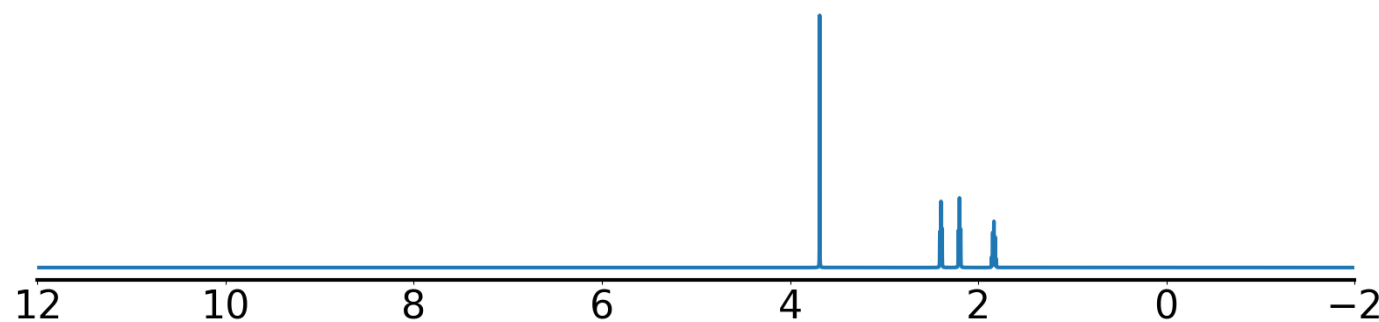

Top predicted structures (loss):

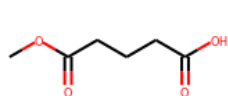

0.011848

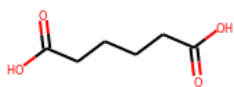

0.029618

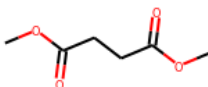

0.031528

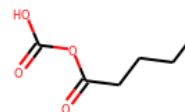

0.034056

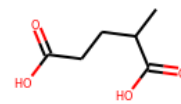

0.048556

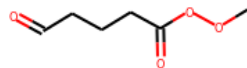

0.049282

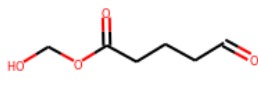

0.050412

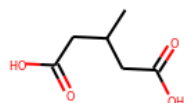

0.050809

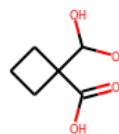

0.055695

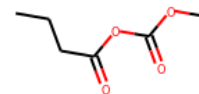

0.055804

|                                   |        |                                   |        |
|-----------------------------------|--------|-----------------------------------|--------|
| Top predicted substructures       | prob   |                                   |        |
| [CX3](=[OX1])C                    | 1.0    | [OX1H0]=[CX3H0]([#8])[CX4H2]      | 0.9786 |
| [#8]=[#6][#8]                     | 0.9999 | [OX2H1]                           | 0.9713 |
| [CX3](=[OX1])O                    | 0.9998 | [CX4H3]                           | 0.9612 |
| [CX4H2]([#6])[#6]                 | 0.9994 | [CX3](=O)[OX2H1]                  | 0.9606 |
| OCC[CH2]                          | 0.9793 | [CX4H2]CC=O                       | 0.9045 |
| best positives                    | prob   | best negatives                    | prob   |
| [CX3](=[OX1])C                    | 1.0    | CCC#CC#C                          | 0.0    |
| [#8]=[#6][#8]                     | 0.9999 | C=CC=CC#C                         | 0.0    |
| [CX3](=[OX1])O                    | 0.9998 | [CX3H0](=[CX3H1])([OX2H0])[CX2H0] | 0.0    |
| [CX4H2]([#6])[#6]                 | 0.9994 | [CX2H0](#[CX2H1])[CX3H0]          | 0.0    |
| OCC[CH2]                          | 0.9793 | [#6X2][#6H1][#6X2]                | 0.0    |
| [OX1H0]=[CX3H0]([#8])[CX4H2]      | 0.9786 | CC#CCC#C                          | 0.0    |
| [OX2H1]                           | 0.9713 | [CX2H0](#[CX2H1])[CX4H0]          | 0.0    |
| [CX4H3]                           | 0.9612 | [CX2H0](#[CX2H0])[CX2H0]          | 0.0    |
| [CX3](=O)[OX2H1]                  | 0.9606 | [CX3H0](=[CX3H1])([CX4H2])[CX2H0] | 0.0    |
| [CX4H2]CC=O                       | 0.9045 | CC=CC#CC                          | 0.0    |
| worst negatives                   | prob   | worst positives                   | prob   |
| [#8][#6H0][#6H1]                  | 0.7252 | [OX2H0][CX3H0][CX4H2]             | 0.4948 |
| [#8]=[#6H0][#6H1]                 | 0.6052 | [CX4H2]([CX4H2])[CX4H2]           | 0.577  |
| [CX3H0](=[OX1H0])([OX2H1])[CX4H1] | 0.4646 | [CX3H0](=[OX1H0])([OX2H0])[CX4H2] | 0.5975 |
| [#6H1]                            | 0.375  | [#8][#6][#6H2]                    | 0.6469 |
| [#8][#6][#6][#6][#6]=[#8]         | 0.3241 | [CX4H2]([CX4H2])[CX3H0]           | 0.696  |
| [#6H1][#6H2]                      | 0.231  | [CX4H2][CX4H2]                    | 0.7094 |
| O=[CX3][CX4H]                     | 0.2265 | [CX4H3][OX2H0]                    | 0.8011 |
| O=[CX3H0][CX4H2][CX4H1]           | 0.217  | [CX3H0](=[OX1H0])([OX2H1])[CX4H2] | 0.8159 |
| [CX4H3][#6]                       | 0.2016 | O=[CX3H0][CX4H2][CX4H2]           | 0.8435 |
| [#8][#6][#6][#6X3]                | 0.1879 | [CX4H2][CX3]=O                    | 0.8545 |

---

Example 30 true smiles: CN1CC(=O)NC1=N formula: C4H7N3O  
Index of correct structure: 0 of 16898  
True structure loss: 0.02136  
True structure:

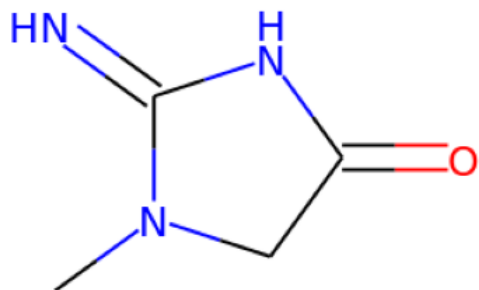

Experimental <sup>13</sup>C NMR (solvent: DMSO)

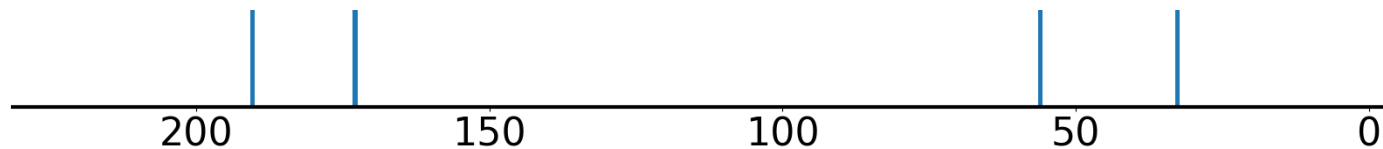

Experimental <sup>1</sup>H NMR (solvent: D2O)

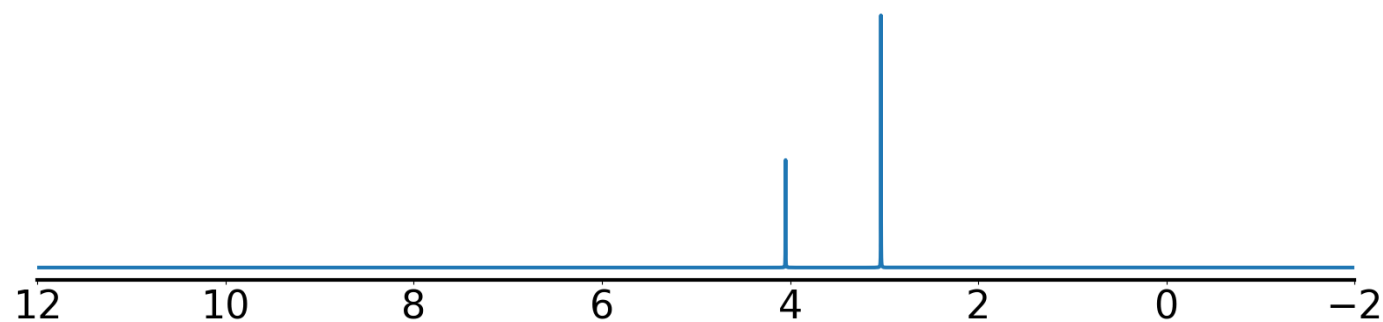

Top predicted structures (loss):

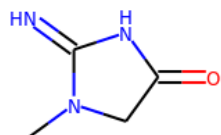

0.02136

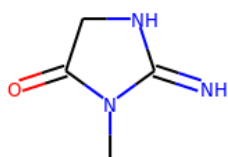

0.028479

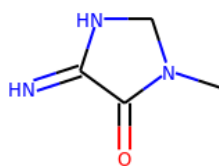

0.030813

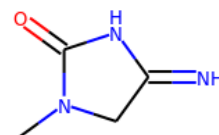

0.031246

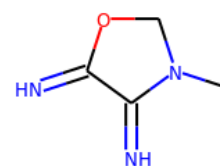

0.032402

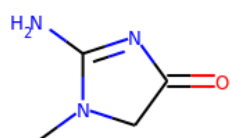

0.032854

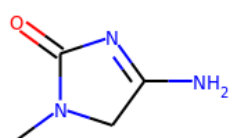

0.035052

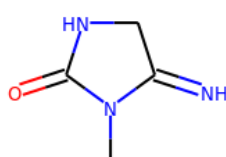

0.035694

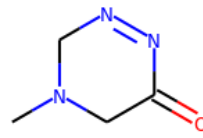

0.036352

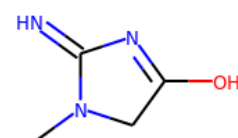

0.036589

| Top predicted substructures  | prob   |                                              |        |
|------------------------------|--------|----------------------------------------------|--------|
| [#7][#6H0]=[#7]              | 0.9591 | [#7X3][#6H3]                                 | 0.9161 |
| [#7][#6][#6X3]               | 0.9489 | [#6]=[#7H]                                   | 0.9137 |
| [CX4H3]                      | 0.9448 | [#6X3][#6H2][#7]                             | 0.8906 |
| [#6H3][#7]                   | 0.9423 | [CX4H2]([NX3H0])[CX3H0]                      | 0.879  |
| [#7][#6]=[#7]                | 0.935  | [#7X3][#6H2]                                 | 0.8653 |
| best positives               | prob   | best negatives                               | prob   |
| [#7][#6H0]=[#7]              | 0.9591 | [#8]1[#6][#6]=[#6]=[#6]1                     | 0.0    |
| [#7][#6][#6X3]               | 0.9489 | [CX3H1](=[CX3H2])[CX2H0]                     | 0.0    |
| [CX4H3]                      | 0.9448 | [OX2H0][CX3H1]=[#6X3H0][#8X2H0]              | 0.0    |
| [#6H3][#7]                   | 0.9423 | [CX3H0](=[CX3H2])([CX4H3])[CX4H0]            | 0.0    |
| [#7][#6]=[#7]                | 0.935  | [OX2H0]1[CX4H2][CX4H2][CX4H1][CX4H1]1        | 0.0    |
| [#7X3][#6H3]                 | 0.9161 | [CX3H2]=[CX3H1][CX4H1]([CX4H1])[OX2H0]       | 0.0    |
| [#6]=[#7H]                   | 0.9137 | [CX3H2]=[CX3H1][CX4H0][OX2H1]                | 0.0    |
| [#6X3][#6H2][#7]             | 0.8906 | [OX2H0][CX4H2][CX4H2][CX4H1][OX2H0]          | 0.0    |
| [CX4H2]([NX3H0])[CX3H0]      | 0.879  | [CX2H0](#[CX2H0])[CX2H0]                     | 0.0    |
| [#7X3][#6H2]                 | 0.8653 | [OX2H0][CX4H1][CX4H1]([CX4H2][CX4H1])[CX4H1] | 0.0    |
| worst negatives              | prob   | worst positives                              | prob   |
| [#7][#6][#6][#6X3]           | 0.3453 | [CX3H0](=[OX1H0])([NX3H1])[CX4H2]            | 0.1109 |
| [#6H1]                       | 0.2854 | [#6X3][#7][#6X3]                             | 0.116  |
| [OX1H0]=[CX3H0]([#6])[CX4H2] | 0.2757 | [#6]1[#6][#7][#6][#7]1                       | 0.2475 |
| [#7H2][#6H0]                 | 0.2753 | [#6X3][#7X3][#6X3]                           | 0.2662 |
| [#7X3H2]                     | 0.2702 | [#7][#6][#6][#7]                             | 0.473  |
| [#6X3][#6X3]                 | 0.2385 | [NH1][#6][#7]                                | 0.5192 |
| [#7][#6H0][#6H1]             | 0.2225 | [CX4H2][CX3]=O                               | 0.5537 |
| [#7][#6][#6][#6][#7]         | 0.1786 | [#7X3H1]                                     | 0.5837 |
| O=[#6][#6][#6X3]             | 0.1695 | [#6H3][#7][#6H2]                             | 0.6003 |
| [CX4H2]([#6])[#6]            | 0.1665 | [CX4H3][NX3H0]                               | 0.656  |

---

Example 31 true smiles: N=C(N)NCC(=O)O formula: C3H7N3O2  
 Index of correct structure: 6 of 15726  
 True structure loss: 0.026552  
 True structure:

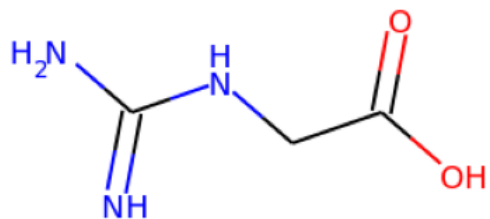

Experimental <sup>13</sup>C NMR (solvent: D2O)

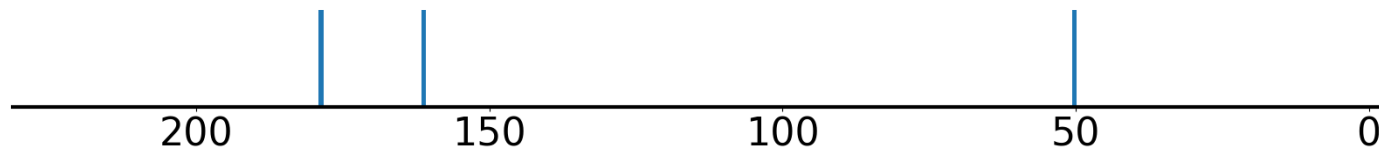

Experimental <sup>1</sup>H NMR (solvent: D2O)

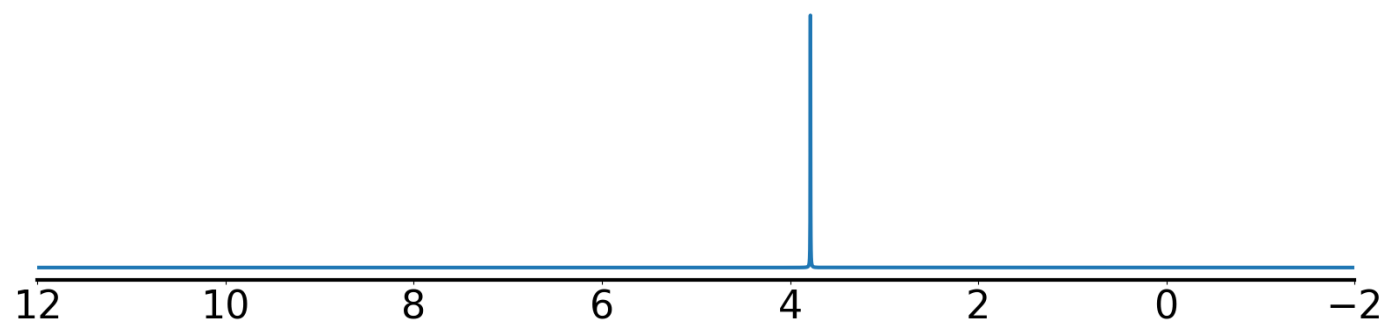

Top predicted structures (loss):

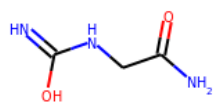

0.020384

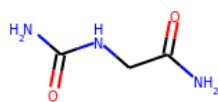

0.021752

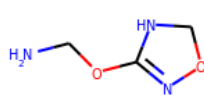

0.026122

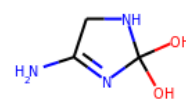

0.026445

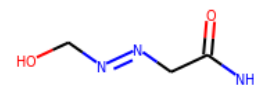

0.026499

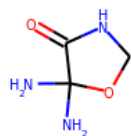

0.026551

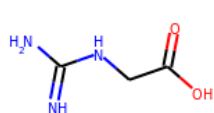

0.026552

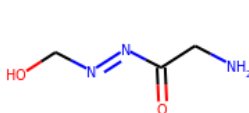

0.027227

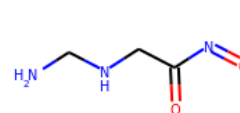

0.027468

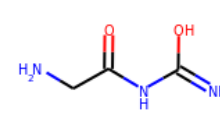

0.027487



|                                   |        |                                   |        |
|-----------------------------------|--------|-----------------------------------|--------|
| Top predicted substructures       | prob   |                                   |        |
| [#7][#6H2]                        | 0.9313 | [#7][#6H0][#7]                    | 0.742  |
| [#7X3H2]                          | 0.9283 | [#7][#6H0]=[#7]                   | 0.7324 |
| [#7X3][#6H2]                      | 0.856  | [#7][#6][#6X3]                    | 0.7294 |
| [CX3](=[OX1])C                    | 0.8397 | [#7][#6]=[#7]                     | 0.6917 |
| [#6X3][#6H2][#7]                  | 0.82   | [CX4H2]([NX3H1])[CX3H0]           | 0.6779 |
| best positives                    | prob   | best negatives                    | prob   |
| [#7][#6H2]                        | 0.9313 | [CX2H0](#[CX2H0])[CX2H0]          | 0.0    |
| [#7X3H2]                          | 0.9283 | C=CCC#C                           | 0.0    |
| [#7X3][#6H2]                      | 0.856  | CC=CCC#C                          | 0.0    |
| [CX3](=[OX1])C                    | 0.8397 | CCC=CC#C                          | 0.0    |
| [#6X3][#6H2][#7]                  | 0.82   | [CX2H1]#[CX2H0][CX3H1]=[CX3H0]    | 0.0    |
| [#7][#6H0][#7]                    | 0.742  | [CX2H0](#[CX2H1])[CX4H1]          | 0.0    |
| [#7][#6H0]=[#7]                   | 0.7324 | [#6X2][#6H1][#6X2]                | 0.0    |
| [#7][#6][#6X3]                    | 0.7294 | CC#CCC#C                          | 0.0    |
| [#7][#6]=[#7]                     | 0.6917 | [CX2H0](#[CX2H1])[CX4H0]          | 0.0    |
| [CX4H2]([NX3H1])[CX3H0]           | 0.6779 | [OX2H0]1[CX4H2][CX4H1][CX4H1]1    | 0.0    |
| worst negatives                   | prob   | worst positives                   | prob   |
| [#7][#6][#6][#7]                  | 0.4249 | [CX3H0](=[OX1H0])([OX2H1])[CX4H2] | 0.1549 |
| [#7H2][#6H2]                      | 0.4205 | [CX3](=O)[OX2H1]                  | 0.1707 |
| [CX4H3]                           | 0.375  | [OX2H1]                           | 0.2216 |
| [#6X3][#7X3][#6X3]                | 0.3605 | [#7][#6]([#7])=[#7]               | 0.2506 |
| [#6X3][#7][#6X3]                  | 0.2295 | [OX1H0]=[CX3H0]([#8])[CX4H2]      | 0.3006 |
| [CX4H3][OX2H0]                    | 0.2196 | [#8][#6][#6H2]                    | 0.3498 |
| [#7X3H0]                          | 0.2149 | [CX3](=[OX1])O                    | 0.3662 |
| O=[#6][#6][#6X3]                  | 0.2102 | [NH1][#6][#7]                     | 0.37   |
| [CX4H3][NX3H0]                    | 0.1828 | [#7][#6][#7]                      | 0.4565 |
| [CX3H0](=[OX1H0])([OX2H0])[CX4H2] | 0.1801 | [#8]=[#6][#8]                     | 0.4577 |

---

Example 32 true smiles: O=C(O)c1ccc(O)cc1 formula: C7H6O3  
Index of correct structure: 0 of 15458  
True structure loss: 0.015458  
True structure:

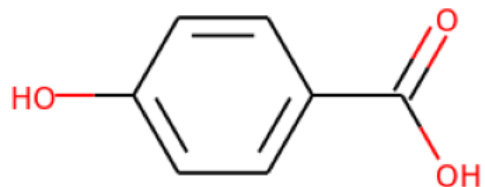

Experimental <sup>13</sup>C NMR (solvent: D2O)

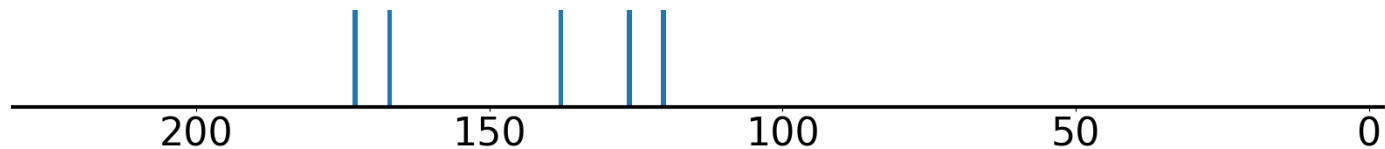

Experimental <sup>1</sup>H NMR (solvent: D2O)

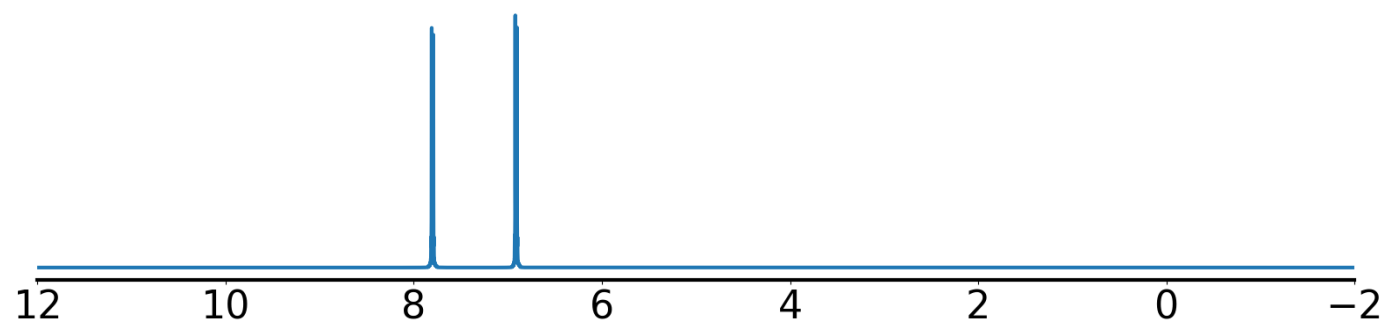

Top predicted structures (loss):

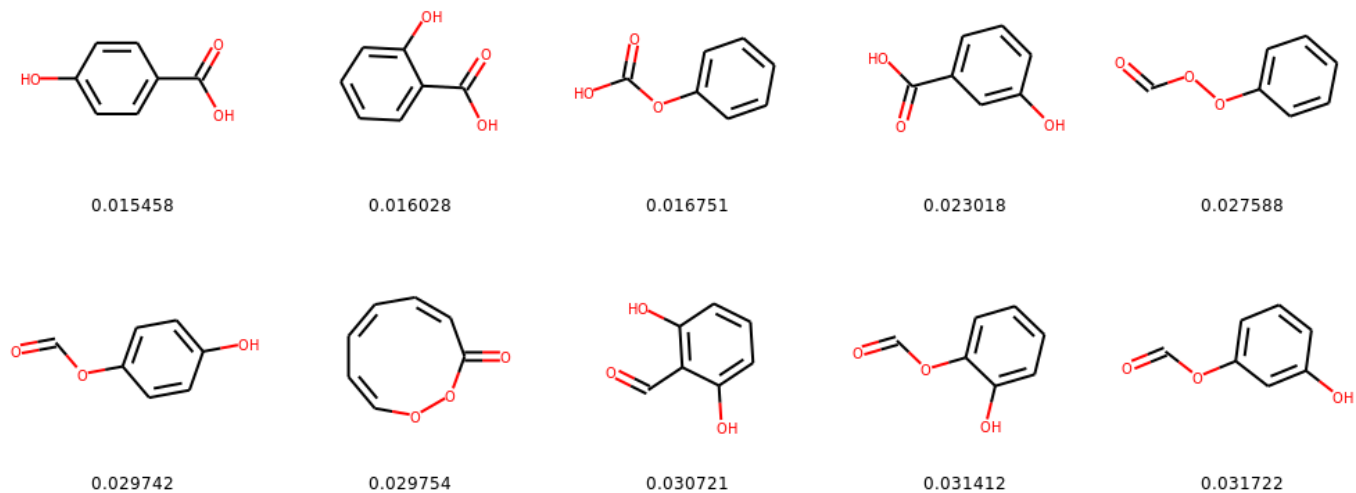

|                             |        |                                           |        |
|-----------------------------|--------|-------------------------------------------|--------|
| Top predicted substructures | prob   |                                           |        |
| [#6X3][#6X3]                | 0.9996 | [CX3](=[OX1])O                            | 0.9809 |
| [#6H1]                      | 0.9994 | [#6X3][#6X3][#6X3][#6X3]                  | 0.9746 |
| [#8]=[#6][#8]               | 0.995  | O=[#6][#6][#6X3]                          | 0.9355 |
| [cH][cH]                    | 0.9895 | [cX3H1]([cX3H1])[cX3H0]                   | 0.9325 |
| [#6X3H1][#6X3H0]            | 0.9843 | [cH]                                      | 0.8623 |
| best positives              | prob   | best negatives                            | prob   |
| [#6X3][#6X3]                | 0.9996 | [CX4H1]([NX3H1])([CX4H3])[CX4H2]          | 0.0    |
| [#6H1]                      | 0.9994 | [#6H3][#7][#6X4H1][#6H3]                  | 0.0    |
| [#8]=[#6][#8]               | 0.995  | [#6H3][#6H0][#7][#6H3]                    | 0.0    |
| [cH][cH]                    | 0.9895 | [CX4H0]([NX3H1])([CX4H3])([CX4H2])[CX4H1] | 0.0    |
| [#6X3H1][#6X3H0]            | 0.9843 | [CX4H0]([NX3H1])([CX4H2])([CX4H2])[CX4H1] | 0.0    |
| [CX3](=[OX1])O              | 0.9809 | [OX2H0][CX4H2][CX4H2][CX4H1][OX2H0]       | 0.0    |
| [#6X3][#6X3][#6X3][#6X3]    | 0.9746 | [CX4H1]([NX3H0])([CX4H2])[CX4H0]          | 0.0    |
| O=[#6][#6][#6X3]            | 0.9355 | [CX4H2]([NX3H0])[CX4H0]                   | 0.0    |
| [cX3H1]([cX3H1])[cX3H0]     | 0.9325 | [CX4H1]([NX3H2])([CX4H2])[CX4H0]          | 0.0    |
| [cH]                        | 0.8623 | [#8][#6H1][#6H2][#6H1]=[#8]               | 0.0    |
| worst negatives             | prob   | worst positives                           | prob   |
| [cX3H1]([cX3H1])[cX3H1]     | 0.7692 | [#6]1[#6][#6][#6][#6]1                    | 0.4336 |
| [CX3](=[OX1])C              | 0.5981 | [OX2H][cX3]:[c]                           | 0.4412 |
| [#8]=[#6H0][#6H1]           | 0.5847 | [cX3H0][cX3H1][cX3H1][cX3H0]              | 0.5008 |
| [OX1H0]=[cX3H0][cX3H1]      | 0.5116 | [#6X3H1][#6X3H1][#6X3H0][#6X3H1]          | 0.5032 |
| O=[cX3]                     | 0.4958 | [cH]cO                                    | 0.5104 |
| [#8][#6][#6]=[#6X3]         | 0.3654 | [CX3](=O)[OX2H1]                          | 0.7037 |
| [#8]=[#6][#6H1][#6H1]       | 0.295  | [OX2H1]                                   | 0.7737 |
| [#8]=[#6][#6H1]=[#6H1]      | 0.2343 | [#6H1][#6H1]                              | 0.7992 |
| [#8][#6H1][#6H1]            | 0.1717 | [#8][#6][#6][#6X3]                        | 0.8104 |
| [#8][#6][#6]=[#6][#6]=[#8]  | 0.164  | [#8][#6H0][#6H1]                          | 0.8359 |

---

Example 33 true smiles: CCC(C)C(N)C(=O)O formula: C6H13NO2  
 Index of correct structure: 0 of 14628  
 True structure loss: 0.020782  
 True structure:

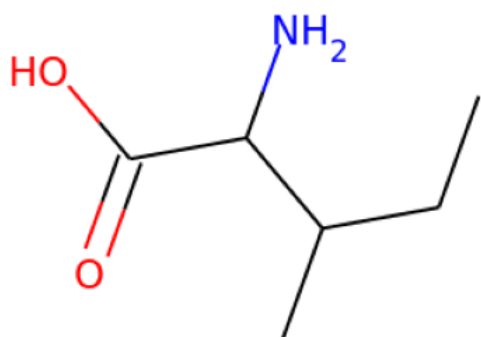

Experimental <sup>13</sup>C NMR (solvent: D2O)

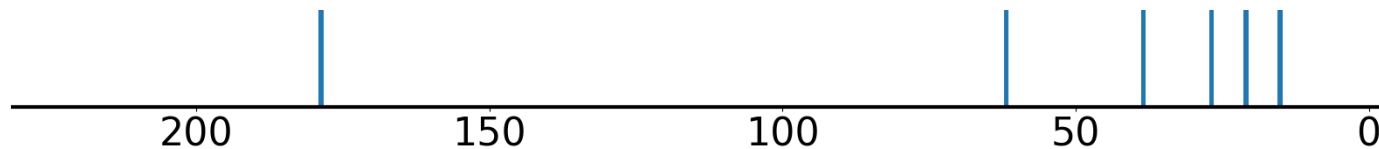

Experimental <sup>1</sup>H NMR (solvent: #N/A)

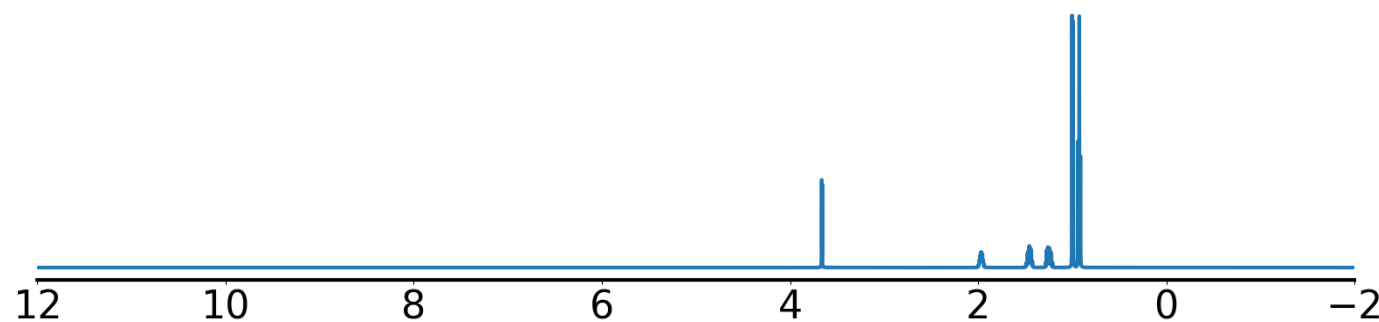

Top predicted structures (loss):

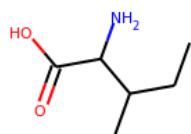

0.020782

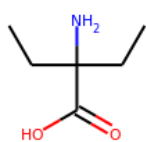

0.032973

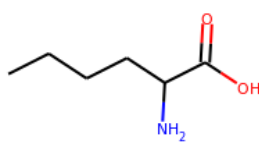

0.035784

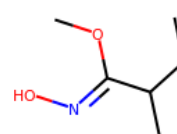

0.038178

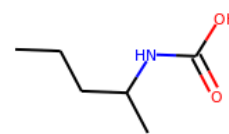

0.040487

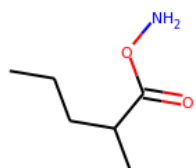

0.04087

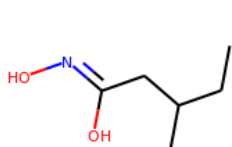

0.041271

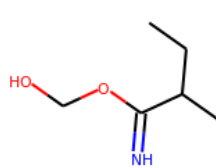

0.041349

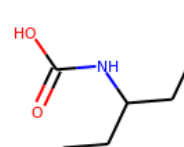

0.041494

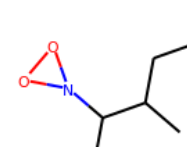

0.042415

| Top predicted substructures | prob        |                                        |             |
|-----------------------------|-------------|----------------------------------------|-------------|
| [CX4H3]                     | 1.0         | [CX4H3][CX4H2]                         | 0.9696      |
| [#6H3][#6][#6]              | 0.9993      | [OX2H1]                                | 0.951       |
| [CX4H3][#6]                 | 0.9978      | [#6H1]                                 | 0.9104      |
| [CX4H2]( [#6] )[#6]         | 0.9951      | [#6H1][#6H2]                           | 0.8587      |
| [CX3](=[OX1])C              | 0.9701      | [CX4H3][CX4H1]                         | 0.8132      |
| <b>best positives</b>       | <b>prob</b> | <b>best negatives</b>                  | <b>prob</b> |
| [CX4H3]                     | 1.0         | C=CC=CC#C                              | 0.0         |
| [#6H3][#6][#6]              | 0.9993      | [CX2H1]#[CX2H0][CX3H1]=[CX3H0]         | 0.0         |
| [CX4H3][#6]                 | 0.9978      | [CX2H0](#[CX2H1])[CX3H0]               | 0.0         |
| [CX4H2]( [#6] )[#6]         | 0.9951      | C=CCC#C                                | 0.0         |
| [CX3](=[OX1])C              | 0.9701      | CC=CC#CC                               | 0.0         |
| [CX4H3][CX4H2]              | 0.9696      | CCC=CC#C                               | 0.0         |
| [OX2H1]                     | 0.951       | CC#CCC=C                               | 0.0         |
| [#6H1]                      | 0.9104      | CC#CCC#C                               | 0.0         |
| [#6H1][#6H2]                | 0.8587      | [CX3H0](=[CX3H1])([OX2H0])[CX2H0]      | 0.0         |
| [CX4H3][CX4H1]              | 0.8132      | [CX2H0](#[CX2H1])[CX3H1]               | 0.0         |
| <b>worst negatives</b>      | <b>prob</b> | <b>worst positives</b>                 | <b>prob</b> |
| OCC[CH2]                    | 0.6286      | [#6H1][#6H1]                           | 0.1391      |
| [CX4H2]CC=O                 | 0.5128      | [CX4H1]( [CX4H3] ) ( [CX4H2] ) [CX4H1] | 0.2299      |
| [#7H2][#6H0]                | 0.3307      | [#7H2][#6X4H1][#6X3]                   | 0.2724      |
| [CX4H2]( [CX4H3] ) [CX4H2]  | 0.3005      | [#6H3][#6H1][#6H1][#7]                 | 0.28        |
| [CX4H2][CX3]=O              | 0.2648      | [#8][#6H0][#6H1]                       | 0.3544      |
| [#7][#6H0][#6H1]            | 0.2337      | [#7H2][#6H1]                           | 0.4785      |
| [#6H3][#6][#6X3]            | 0.2278      | [#6H3][#6][#6][#6H3]                   | 0.5045      |
| [CX4H2]( [CX4H2] ) [CX4H1]  | 0.2163      | [#8]=[#6][#6H1][#6H1]                  | 0.5385      |
| [#7X3H1]                    | 0.2044      | [CX3H0](=[OX1H0])([OX2H1])[CX4H1]      | 0.5623      |
| [CX4H2][CX4H2]              | 0.1429      | [CX4H2]( [CX4H3] ) [CX4H1]             | 0.568       |

---

Example 34 true smiles: CCC(C)C(N)C(=O)O formula: C6H13NO2  
 Index of correct structure: 0 of 14628  
 True structure loss: 0.020715  
 True structure:



Experimental <sup>13</sup>C NMR (solvent: D2O)



Experimental <sup>1</sup>H NMR (solvent: d2o)

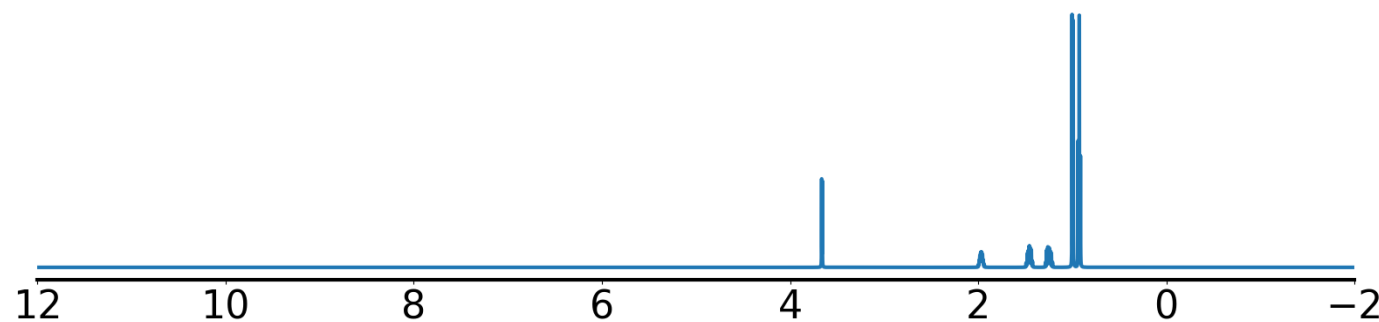

Top predicted structures (loss):

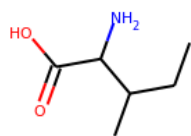

0.020715

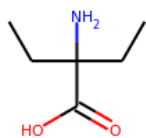

0.03305

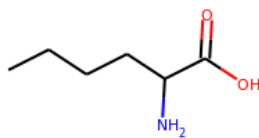

0.035674

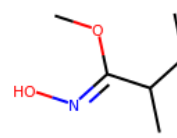

0.038283

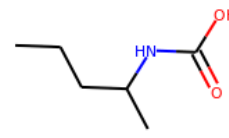

0.040448

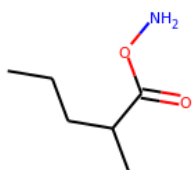

0.040841

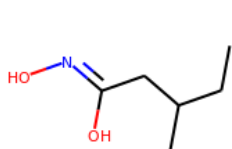

0.041151

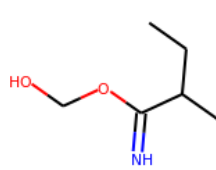

0.04141

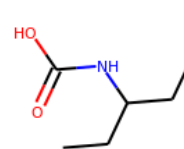

0.041454

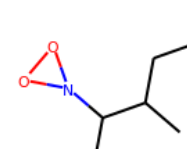

0.042373

| Top predicted substructures | prob   |                                        |        |
|-----------------------------|--------|----------------------------------------|--------|
| [CX4H3]                     | 1.0    | [CX4H3][CX4H2]                         | 0.9698 |
| [#6H3][#6][#6]              | 0.9993 | [OX2H1]                                | 0.951  |
| [CX4H3][#6]                 | 0.9978 | [#6H1]                                 | 0.912  |
| [CX4H2]([#6])[#6]           | 0.9952 | [#6H1][#6H2]                           | 0.8584 |
| [CX3](=[OX1])C              | 0.9698 | [CX4H3][CX4H1]                         | 0.8102 |
| best positives              | prob   | best negatives                         | prob   |
| [CX4H3]                     | 1.0    | C=CC=CC#C                              | 0.0    |
| [#6H3][#6][#6]              | 0.9993 | [CX2H1][CX2H0][CX3H1]=[CX3H0]          | 0.0    |
| [CX4H3][#6]                 | 0.9978 | [CX2H0](#[CX2H1])[CX3H0]               | 0.0    |
| [CX4H2]([#6])[#6]           | 0.9952 | C=CCCC#C                               | 0.0    |
| [CX3](=[OX1])C              | 0.9698 | CC=CC#CC                               | 0.0    |
| [CX4H3][CX4H2]              | 0.9698 | CCC=CC#C                               | 0.0    |
| [OX2H1]                     | 0.951  | CC#CCC=C                               | 0.0    |
| [#6H1]                      | 0.912  | CC#CCC#C                               | 0.0    |
| [#6H1][#6H2]                | 0.8584 | [CX3H0](=[CX3H1])([OX2H0])[CX2H0]      | 0.0    |
| [CX4H3][CX4H1]              | 0.8102 | [CX2H0](#[CX2H1])[CX3H1]               | 0.0    |
| worst negatives             | prob   | worst positives                        | prob   |
| OCC[CH2]                    | 0.6303 | [#6H1][#6H1]                           | 0.1428 |
| [CX4H2]CC=O                 | 0.5085 | [CX4H1]( [CX4H3] ) ( [CX4H2] ) [CX4H1] | 0.2332 |
| [#7H2][#6H0]                | 0.3281 | [#6H3][#6H1][#6H1][#7]                 | 0.2782 |
| [CX4H2]( [CX4H3] ) [CX4H2]  | 0.2986 | [#7H2][#6X4H1][#6X3]                   | 0.2805 |
| [CX4H2][CX3]=O              | 0.2681 | [#8][#6H0][#6H1]                       | 0.3512 |
| [#7][#6H0][#6H1]            | 0.2309 | [#7H2][#6H1]                           | 0.488  |
| [#6H3][#6][#6X3]            | 0.2298 | [#6H3][#6][#6][#6H3]                   | 0.5034 |
| [CX4H2]( [CX4H2] ) [CX4H1]  | 0.2201 | [#8]=[#6][#6H1][#6H1]                  | 0.542  |
| [#7X3H1]                    | 0.206  | [CX3H0](=[OX1H0])([OX2H1])[CX4H1]      | 0.5655 |
| [CX4H2][CX4H2]              | 0.1459 | [CX4H2]( [CX4H3] ) [CX4H1]             | 0.5706 |

---

Example 35 true smiles: CCC(C)C(N)C(=O)O formula: C6H13NO2  
 Index of correct structure: 0 of 14628  
 True structure loss: 0.021957  
 True structure:



Experimental <sup>13</sup>C NMR (solvent: D2O)

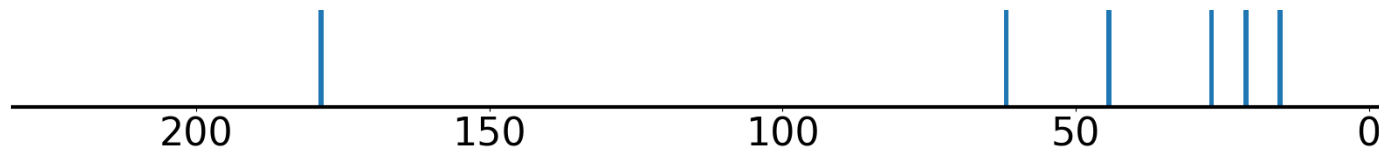

Experimental <sup>1</sup>H NMR (solvent: D2O)

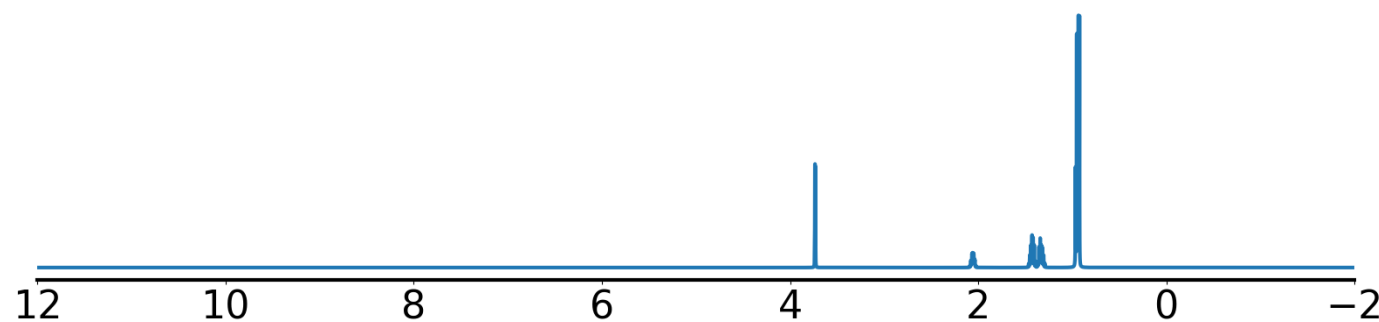

Top predicted structures (loss):

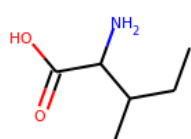

0.021957

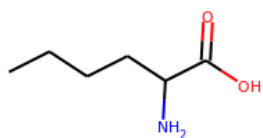

0.032026

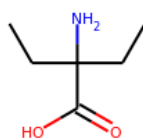

0.033232

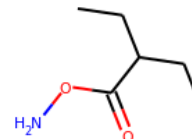

0.037734

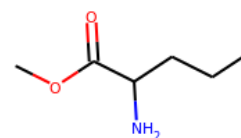

0.039877

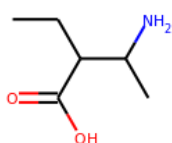

0.043138

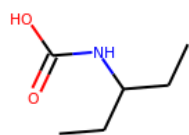

0.044492

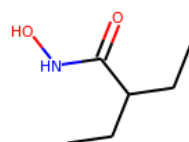

0.044893

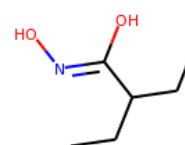

0.047251

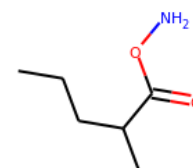

0.047937



| Top predicted substructures | prob   |                                   |        |
|-----------------------------|--------|-----------------------------------|--------|
| [CX4H3]                     | 1.0    | [CX4H2]([#6])[#6]                 | 0.9859 |
| [#6H3][#6][#6]              | 0.9996 | O=[CX3][CX4H]                     | 0.9175 |
| [CX4H3][#6]                 | 0.9987 | [#7X3H2]                          | 0.8853 |
| [CX4H3][CX4H2]              | 0.9974 | [OX2H1]                           | 0.8583 |
| [CX3](=[OX1])C              | 0.9872 | [#8]=[#6][#8]                     | 0.8435 |
| best positives              | prob   | best negatives                    | prob   |
| [CX4H3]                     | 1.0    | [CX2H1]#[CX2H0][CX3H1]=[CX3H0]    | 0.0    |
| [#6H3][#6][#6]              | 0.9996 | [CX2H0](#[CX2H1])[CX3H0]          | 0.0    |
| [CX4H3][#6]                 | 0.9987 | C=CC=CC#C                         | 0.0    |
| [CX4H3][CX4H2]              | 0.9974 | CC=CC#CC                          | 0.0    |
| [CX3](=[OX1])C              | 0.9872 | C=CCCC#C                          | 0.0    |
| [CX4H2]([#6])[#6]           | 0.9859 | CCC=CC#C                          | 0.0    |
| O=[CX3][CX4H]               | 0.9175 | [CX3H0](=[CX3H1])([OX2H0])[CX2H0] | 0.0    |
| [#7X3H2]                    | 0.8853 | CC#CCC=C                          | 0.0    |
| [OX2H1]                     | 0.8583 | [CX2H0](#[CX2H1])[CX3H1]          | 0.0    |
| [#8]=[#6][#8]               | 0.8435 | CCC#CC=C                          | 0.0    |
| worst negatives             | prob   | worst positives                   | prob   |
| [CX4H2]CC=O                 | 0.611  | [#6H1][#6H1]                      | 0.093  |
| OCC[CH2]                    | 0.5543 | [CX4H1]([CX4H3])([CX4H2])[CX4H1]  | 0.1567 |
| [CX4H2]([CX4H3])[CX4H2]     | 0.5193 | [#6H3][#6][#6][#6H3]              | 0.2537 |
| [#7H2][#6H0]                | 0.3486 | [#6H3][#6H1][#6H1][#7]            | 0.369  |
| [#7][#6H0][#6H1]            | 0.2973 | [CX4H3][CX4H1]                    | 0.3748 |
| [CX4H2][CX3]=O              | 0.2736 | [#8][#6H0][#6H1]                  | 0.4466 |
| [CX4H2][CX4H2]              | 0.263  | [#7H2][#6H1]                      | 0.4537 |
| [#7X3H1]                    | 0.2456 | [CHX4]([CH3X4])[CH2X4]            | 0.5275 |
| [#8][#6][#6H2]              | 0.2017 | [CX3H0](=[OX1H0])([OX2H1])[CX4H1] | 0.6592 |
| [#8][#6][#6][#6X3]          | 0.1416 | [#7H2][#6X4H1][#6X3]              | 0.6768 |

---

Example 36 true smiles: CN1CCN(C)C1=O formula: C5H10N2O  
Index of correct structure: 0 of 14072  
True structure loss: 0.02034  
True structure:

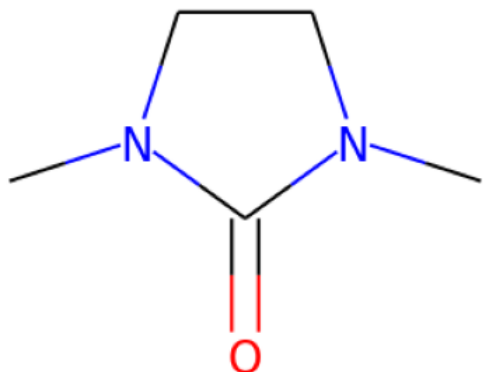

Experimental <sup>13</sup>C NMR (solvent: CDCl<sub>3</sub>)

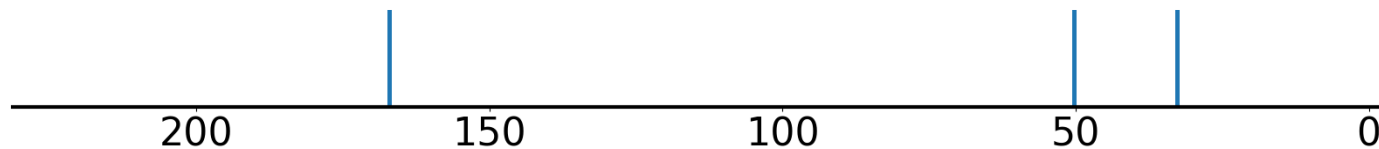

Experimental <sup>1</sup>H NMR (solvent: CDCl<sub>3</sub>)

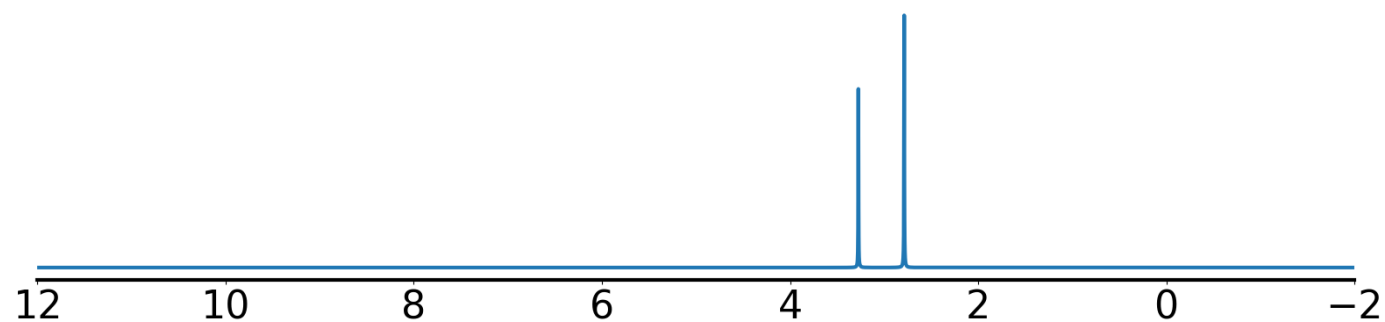

Top predicted structures (loss):

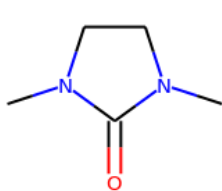

0.02034

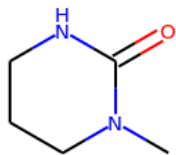

0.024699

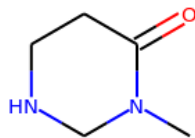

0.027254

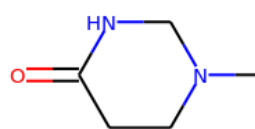

0.027517

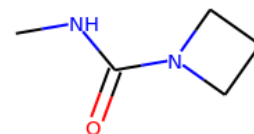

0.029084

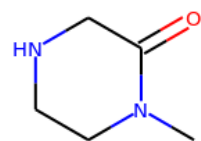

0.029595

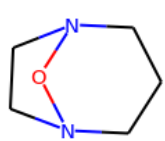

0.031556

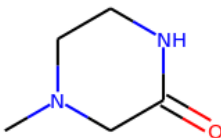

0.031675

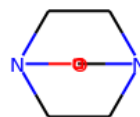

0.032324

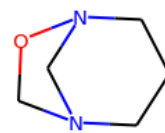

0.032494

|                             |        |                                   |        |
|-----------------------------|--------|-----------------------------------|--------|
| Top predicted substructures | prob   |                                   |        |
| [#7X3][#6H2]                | 0.968  | [CX4H2][CX4H2]                    | 0.818  |
| [#7][#6H2]                  | 0.9601 | [#6H2][#7][#6X3]                  | 0.7848 |
| [#7][#6H2][#6H2]            | 0.9204 | [#6H3][#7][#6X3]                  | 0.7758 |
| [#7X3][#6H3]                | 0.8688 | [CX4H2]([NX3H0])[CX4H2]           | 0.7597 |
| [#6H3][#7]                  | 0.8488 | [#7X3H0]                          | 0.7487 |
| best positives              | prob   | best negatives                    | prob   |
| [#7X3][#6H2]                | 0.968  | C=CC=CC#C                         | 0.0    |
| [#7][#6H2]                  | 0.9601 | [CX2H0](#[CX2H1])[cX3H0]          | 0.0    |
| [#7][#6H2][#6H2]            | 0.9204 | [CX2H1]#[CX2H0][CX4H1][OX2H1]     | 0.0    |
| [#7X3][#6H3]                | 0.8688 | C=CCCC#C                          | 0.0    |
| [#6H3][#7]                  | 0.8488 | [CX3H0](=[CX3H1])([OX2H0])[CX2H0] | 0.0    |
| [CX4H2][CX4H2]              | 0.818  | CC=CC#CC                          | 0.0    |
| [#6H2][#7][#6X3]            | 0.7848 | CCC=CC#C                          | 0.0    |
| [#6H3][#7][#6X3]            | 0.7758 | [CX3H1](=[CX3H2])[CX2H0]          | 0.0    |
| [CX4H2]([NX3H0])[CX4H2]     | 0.7597 | [CX3H1](=[CX3H1])[CX2H0]          | 0.0    |
| [#7X3H0]                    | 0.7487 | [CX4H2]([CX4H3])[CX2H0]           | 0.0    |
| worst negatives             | prob   | worst positives                   | prob   |
| [#7X3H1]                    | 0.6854 | [#6]1[#6][#7][#6][#7]1            | 0.2071 |
| [CX4H2]([CX4H2])[CX3H0]     | 0.5299 | [#7][#6H0][#7]                    | 0.4379 |
| [CX4H2][CX3]=O              | 0.5005 | [#7][#6][#7]                      | 0.4784 |
| [CX4H2]([#6])[#6]           | 0.4992 | [#7][#6][#6][#7]                  | 0.5494 |
| [CX4H2]([NX3H1])[CX4H2]     | 0.467  | [#6H3][#7][#6H2]                  | 0.6348 |
| [CX3](=[OX1])C              | 0.4186 | [CX4H3]                           | 0.6473 |
| [#7][#6][#6][#6X3]          | 0.4131 | [#7][#6H2][#6H2][#7]              | 0.6488 |
| [#6H2][#7][#6H2]            | 0.35   | [#6H3][#7X3H0][#6X4H2][#6X4H2]    | 0.6674 |
| [#7][#6][#6][#6][#7]        | 0.3382 | [CX4H3][NX3H0]                    | 0.741  |
| [NH1][#6][#7]               | 0.3333 | [#7X3H0]                          | 0.7487 |

---

Example 37 true smiles: O=C1CCNC(=O)N1 formula: C4H6N2O2  
Index of correct structure: 0 of 12102  
True structure loss: 0.026577  
True structure:

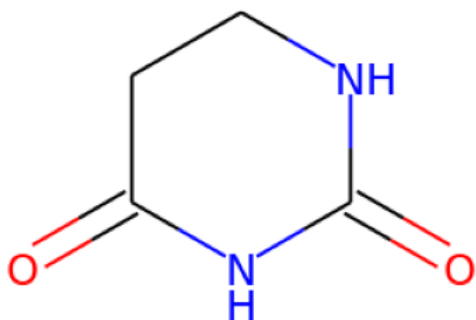

Experimental <sup>13</sup>C NMR (solvent: DMSO)

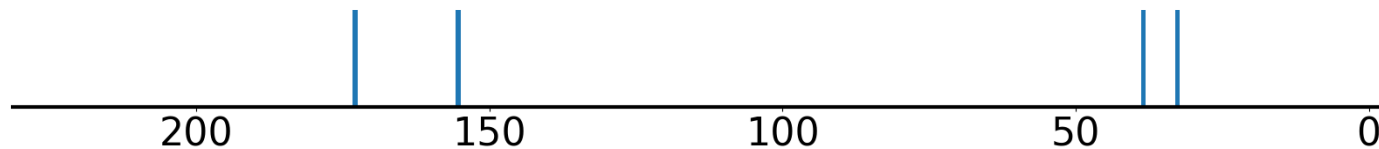

Experimental <sup>1</sup>H NMR (solvent: D2O)

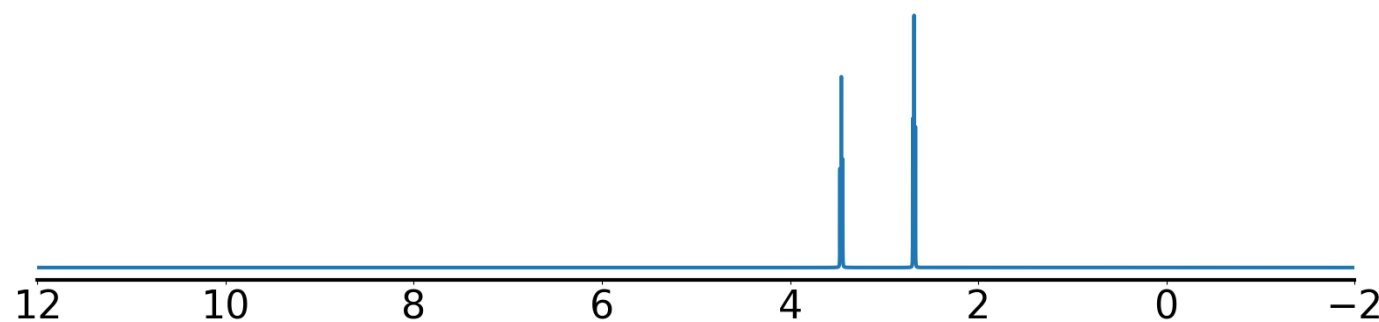

Top predicted structures (loss):

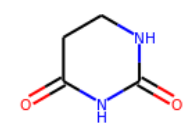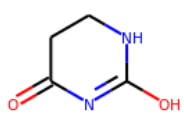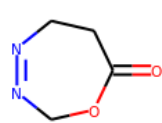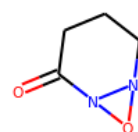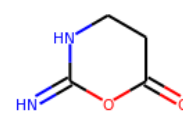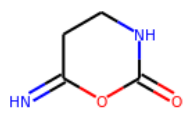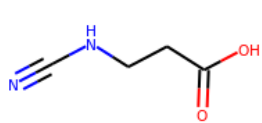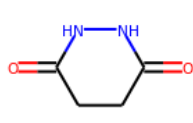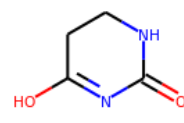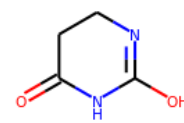

|                                |        |                                           |        |
|--------------------------------|--------|-------------------------------------------|--------|
| Top predicted substructures    | prob   |                                           |        |
| [CX4H2]([#6])[#6]              | 0.9954 | [#7][#6H2]                                | 0.8652 |
| [CX4H2]([CX4H2])[CX3H0]        | 0.922  | [CX4H2][CX3]=O                            | 0.8137 |
| [CX3](=[OX1])C                 | 0.8961 | [CX4H2]CC=O                               | 0.7189 |
| [CX4H2][CX4H2]                 | 0.8837 | [#6X3][#7X3][#6X3]                        | 0.652  |
| O=[CX3H0][CX4H2][CX4H2]        | 0.8827 | [#8]=[#6][#8]                             | 0.6518 |
| best positives                 | prob   | best negatives                            | prob   |
| [CX4H2]([#6])[#6]              | 0.9954 | C=CC=CC#C                                 | 0.0    |
| [CX4H2]([CX4H2])[CX3H0]        | 0.922  | [CX3H0](=[CX3H2])([CX4H3])[CX4H0]         | 0.0    |
| [CX3](=[OX1])C                 | 0.8961 | [CX4H0]([CX4H3])([CX4H2])([CX4H1])[CX3H1] | 0.0    |
| [CX4H2][CX4H2]                 | 0.8837 | CC=CC#CC                                  | 0.0    |
| O=[CX3H0][CX4H2][CX4H2]        | 0.8827 | [CX4H0]([CX4H3])([CX4H2])([CX4H1])[CX4H1] | 0.0    |
| [#7][#6H2]                     | 0.8652 | C=CCC#C                                   | 0.0    |
| [CX4H2][CX3]=O                 | 0.8137 | CC=CCC#C                                  | 0.0    |
| [CX4H2]CC=O                    | 0.7189 | [CX2H0](#[CX2H0])[CX2H0]                  | 0.0    |
| [#6X3][#7X3][#6X3]             | 0.652  | [CX2H1]#[CX2H0][CX3H1]=[CX3H0]            | 0.0    |
| [#7][#6H2][#6H2]               | 0.6169 | [CX3H1](=[CX3H2])[CX4H0]                  | 0.0    |
| worst negatives                | prob   | worst positives                           | prob   |
| [#8]=[#6][#8]                  | 0.6518 | [#7][#6][#6][#6][#7]                      | 0.1724 |
| [CX3](=[OX1])O                 | 0.6105 | [CX4H2]([NX3H1])[CX4H2]                   | 0.1782 |
| [#8][#6][#6H2]                 | 0.6076 | [CX3H0](=[OX1H0])([NX3H1])[CX4H2]         | 0.2742 |
| [#7X3H0]                       | 0.515  | [NH1][#6][#7]                             | 0.3606 |
| [#7][#6][#6X3]                 | 0.5004 | [#7][#6][#6][#6X3]                        | 0.394  |
| OCC[CH2]                       | 0.4191 | [#7X3H1]                                  | 0.4338 |
| [OX1H0]=[CX3H0]([#8])[CX4H2]   | 0.3048 | [#7][#6][#7]                              | 0.4994 |
| [OX2H1]                        | 0.3046 | [#6X3][#7][#6X3]                          | 0.5718 |
| [#6X3H0][CX4H2][CX4H2][#6X3H0] | 0.2809 | [#7][#6H0][#7]                            | 0.5769 |
| [#6H3][#7]                     | 0.2805 | [#7X3][#6H2]                              | 0.5941 |

---

Example 38 true smiles: CN1CC(=O)NC1=O formula: C4H6N2O2  
Index of correct structure: 0 of 12102  
True structure loss: 0.027381  
True structure:

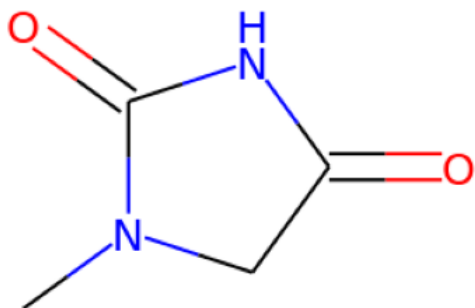

Experimental <sup>13</sup>C NMR (solvent: DMSO-d<sub>6</sub>)

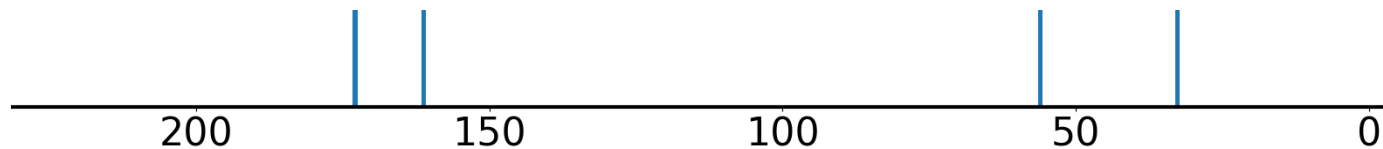

Experimental <sup>1</sup>H NMR (solvent: D<sub>2</sub>O)

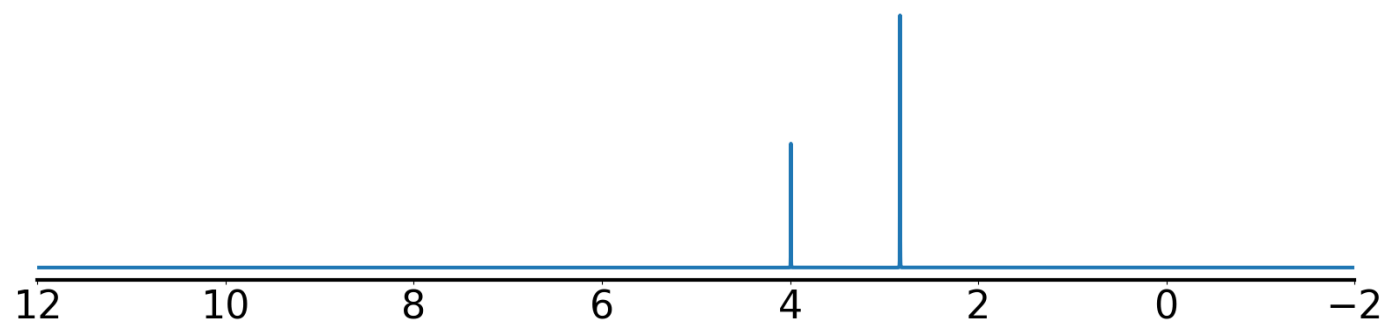

Top predicted structures (loss):

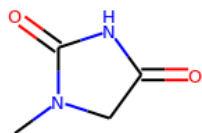

0.027381

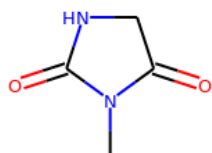

0.031975

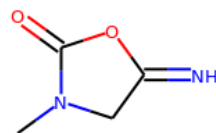

0.035806

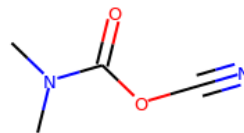

0.036366

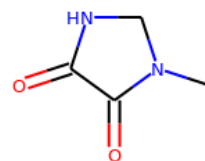

0.037764

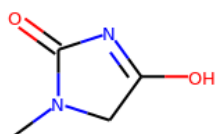

0.038849

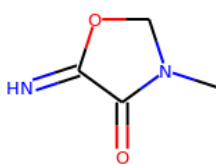

0.039835

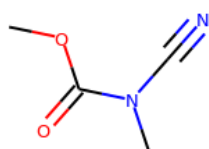

0.041758

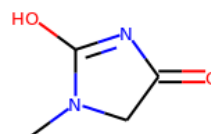

0.04187

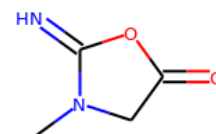

0.041875

|                              |        |                                       |        |
|------------------------------|--------|---------------------------------------|--------|
| Top predicted substructures  | prob   |                                       |        |
| [#7X3][#6H3]                 | 0.985  | [CX3](=[OX1])C                        | 0.781  |
| [CX4H3]                      | 0.9838 | [#8]=[#6][#8]                         | 0.7127 |
| [#6H3][#7]                   | 0.9497 | [CX4H2]([NX3H0])[CX3H0]               | 0.6611 |
| [#6H3][#7][#6X3]             | 0.8954 | [#7][#6H0][#7]                        | 0.6152 |
| [#7][#6][#6X3]               | 0.8333 | [#7][#6][#7]                          | 0.6151 |
| best positives               | prob   | best negatives                        | prob   |
| [#7X3][#6H3]                 | 0.985  | [CX3H1](=[CX3H2])[CX2H0]              | 0.0    |
| [CX4H3]                      | 0.9838 | [OX2H0]1[CX4H2][CX4H2][CX4H1][CX4H1]1 | 0.0    |
| [#6H3][#7]                   | 0.9497 | CC=CC#CC                              | 0.0    |
| [#6H3][#7][#6X3]             | 0.8954 | [CX2H0](#[CX2H1])[CX2H0]              | 0.0    |
| [#7][#6][#6X3]               | 0.8333 | [CX4H2]([CX4H3])[CX2H0]               | 0.0    |
| [CX3](=[OX1])C               | 0.781  | [OX2H0][CX4H2][CX4H1]([CX4H1])[CX4H1] | 0.0    |
| [CX4H2]([NX3H0])[CX3H0]      | 0.6611 | [CX4H1]([CX4H1])([CX4H1])[CX2H0]      | 0.0    |
| [#7][#6H0][#7]               | 0.6152 | CCC#CC=C                              | 0.0    |
| [#7][#6][#7]                 | 0.6151 | C=CCCC#C                              | 0.0    |
| [#6X3][#6H2][#7]             | 0.5738 | [OX2H0][CX4H2][CX4H1]([CX4H1])[CX4H3] | 0.0    |
| worst negatives              | prob   | worst positives                       | prob   |
| [#8]=[#6][#8]                | 0.7127 | [CX3H0](=[OX1H0])([NX3H1])[CX4H2]     | 0.2485 |
| O=[#6][#6][#6X3]             | 0.489  | [#6H3][#7][#6H2]                      | 0.3652 |
| [CX3](=[OX1])O               | 0.462  | [#7H1][#6H0][#7X3][#6H3]              | 0.3771 |
| [#6H1]                       | 0.3336 | [#6H2][#7][#6X3]                      | 0.3873 |
| [OX1H0]=[CX3H0]([#8])[CX4H2] | 0.3033 | [#6X3][#7][#6X3]                      | 0.4383 |
| [CX4H3][NX3H1]               | 0.3005 | [#7][#6H2]                            | 0.4448 |
| [#6X3][#6X3]                 | 0.2966 | [NH1][#6][#7]                         | 0.4489 |
| [#7][#6][#6][#6X3]           | 0.2926 | [#6X3][#7X3][#6X3]                    | 0.4554 |
| [#7][#6H0][#6H1]             | 0.2765 | [CX4H3][NX3H0]                        | 0.4566 |
| [#8][#6][#6][#6X3]           | 0.2634 | [CX4H2][CX3]=O                        | 0.458  |

---

Example 39 true smiles: O=CC=Cc1ccccc1 formula: C9H8O  
Index of correct structure: 1 of 10441  
True structure loss: 0.026198  
True structure:

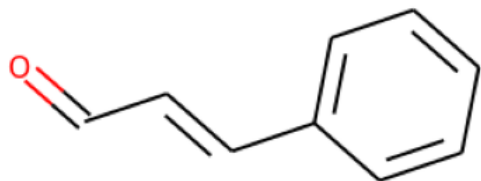

Experimental <sup>13</sup>C NMR (solvent: CDCl<sub>3</sub>)

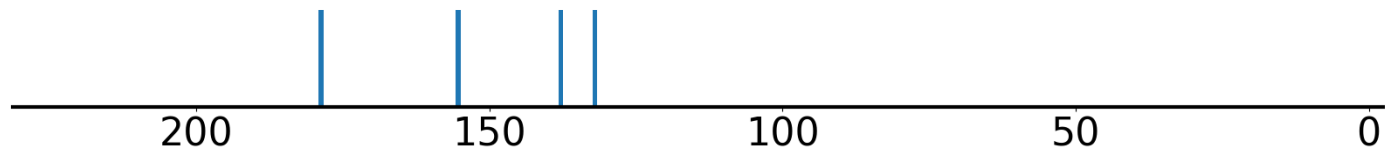

Experimental <sup>1</sup>H NMR (solvent: MeOD)

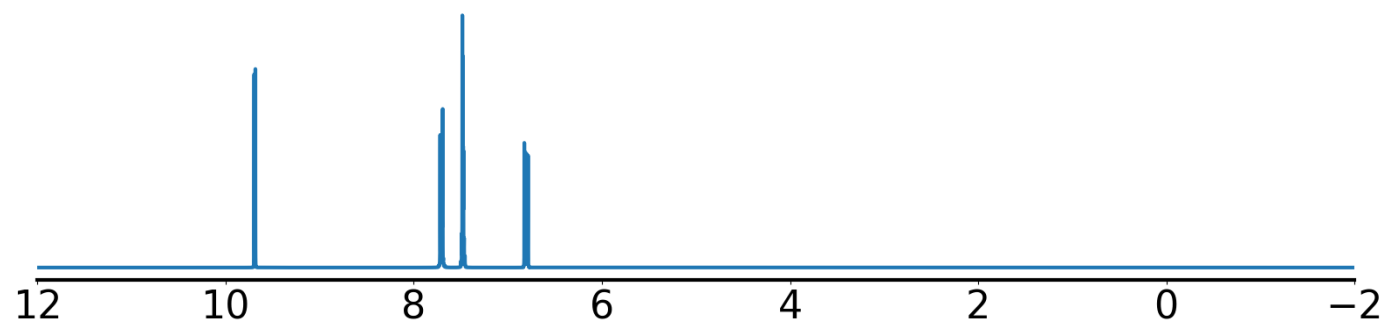

Top predicted structures (loss):

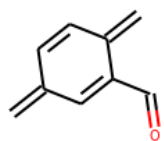

0.023761

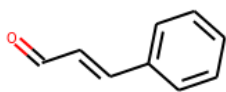

0.026198

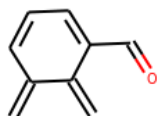

0.027599

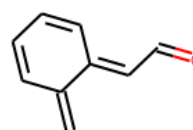

0.034457

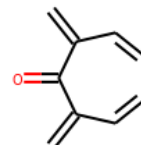

0.034579

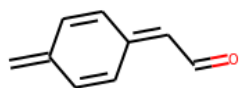

0.034709

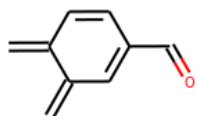

0.035367

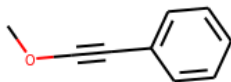

0.041816

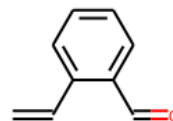

0.046832

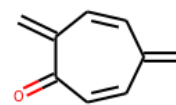

0.047059



|                                  |        |                                           |        |
|----------------------------------|--------|-------------------------------------------|--------|
| Top predicted substructures      | prob   |                                           |        |
| [#6H1]                           | 0.9998 | [#6H1][#6H1]                              | 0.973  |
| [#6X3][#6X3]                     | 0.9996 | [cH]                                      | 0.9162 |
| [#6X3][#6X3][#6X3][#6X3]         | 0.9882 | [cX3H1]([cX3H1])[cX3H0]                   | 0.8928 |
| [cH][cH]                         | 0.9804 | [CX3H1](=O)[#6]                           | 0.8851 |
| [#6X3H1][#6X3H0]                 | 0.9793 | [#6X3H1][#6X3H1][#6X3H0][#6X3H1]          | 0.8614 |
| best positives                   | prob   | best negatives                            | prob   |
| [#6H1]                           | 0.9998 | [OX2H0]1[CX4H2][CX4H2][CX4H1][CX4H1]1     | 0.0    |
| [#6X3][#6X3]                     | 0.9996 | [CX4H0]([OX2H1])([CX4H3])([CX4H2])[CX4H1] | 0.0    |
| [#6X3][#6X3][#6X3][#6X3]         | 0.9882 | [OX2H0][CX4H2][CX4H2][CX4H1][OX2H0]       | 0.0    |
| [cH][cH]                         | 0.9804 | [OX2H1][CX4H2][CX4H1]([OX2H0])[CX4H1]     | 0.0    |
| [#6X3H1][#6X3H0]                 | 0.9793 | [#8][#6H1][#6H2][#6H1]=[#8]               | 0.0    |
| [#6H1][#6H1]                     | 0.973  | [CX4H0]([NX3H1])([CX4H3])([CX4H2])[CX4H1] | 0.0    |
| [cH]                             | 0.9162 | [CX4H1]([OX2H0])([CX4H3])[CX4H0]          | 0.0    |
| [cX3H1]([cX3H1])[cX3H0]          | 0.8928 | [CX4H0]([NX3H1])([CX4H2])([CX4H2])[CX4H1] | 0.0    |
| [CX3H1](=O)[#6]                  | 0.8851 | [CX4H0]([OX2H0])([CX4H3])([CX4H2])[CX4H1] | 0.0    |
| [#6X3H1][#6X3H1][#6X3H0][#6X3H1] | 0.8614 | [CX4H1]([OX2H1])([CX4H2])[CX2H0]          | 0.0    |
| worst negatives                  | prob   | worst positives                           | prob   |
| O=[#6][#6][#6X3]                 | 0.4865 | [#8]=[#6][#6H1]=[#6H1]                    | 0.1025 |
| [#8]=[#6H][#6X3][#6X3H]          | 0.2813 | [CHX3](=C)C                               | 0.1122 |
| [#8]=[#6H0][#6H1]                | 0.1435 | O=[#6][#6]=[#6X3]                         | 0.1177 |
| [CX3H0][CX3H1]=[CX3H1][CX3H0]    | 0.1225 | [CX3H1](=[CX3H1])[CX3H1]                  | 0.1526 |
| [#6X3]=[#6X3][#6X3]=[#6X3]       | 0.1159 | [CX3H1](=[CX3H1])[cX3H0]                  | 0.1569 |
| [#8][#6H0][#6H1]                 | 0.099  | [#6X3][#6X3][#6X3]=[#6X3]                 | 0.1891 |
| [cX3H0][cX3H1][cX3H1][cX3H0]     | 0.0927 | [#6X3H1]=[#6X3H1][#6X3H0][#6X3H1]         | 0.2076 |
| [OX1H0]=[CX3H0][CX3H1]=[CX3H1]   | 0.0819 | [#8]=[#6H1][#6H1]                         | 0.2111 |
| [#8][#6][#6][#6X3]               | 0.08   | [#8]=[#6H][#6X3]=[#6X3H]                  | 0.2295 |
| [cX3H0]([cX3H1])([cX3H0])[CX4H2] | 0.0574 | [CX3H1](=[OX1H0])[CX3H1]                  | 0.266  |

---

Example 40 true smiles: O=C(O)c1ccccn1 formula: C6H5NO2  
Index of correct structure: 0 of 10337  
True structure loss: 0.012249  
True structure:

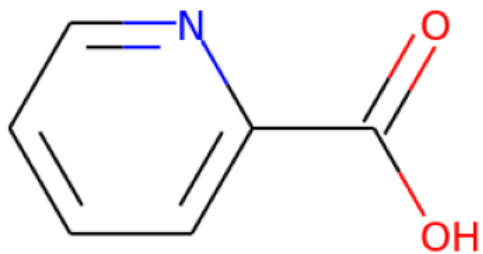

Experimental <sup>13</sup>C NMR (solvent: DMSO)

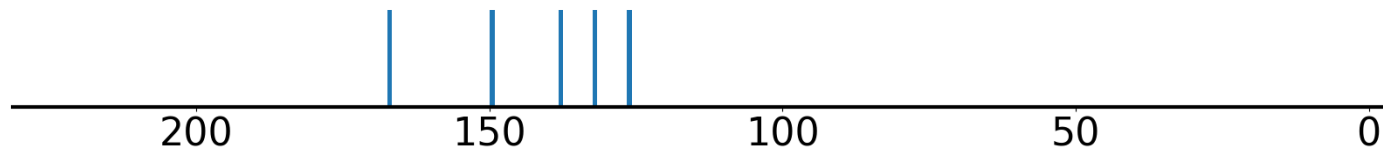

Experimental <sup>1</sup>H NMR (solvent: D2O)

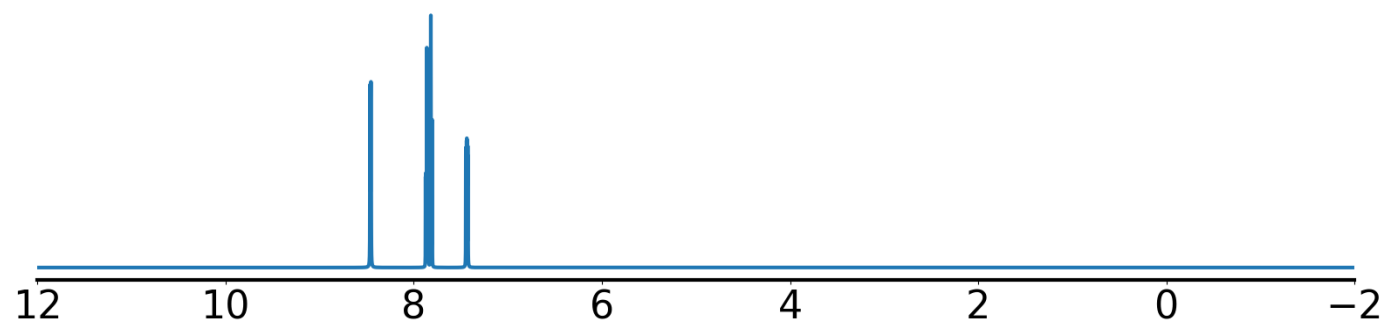

Top predicted structures (loss):

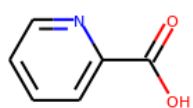

0.012249

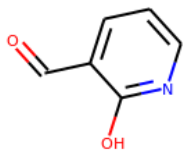

0.021685

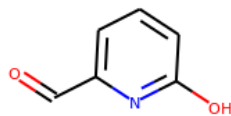

0.022058

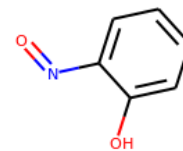

0.023854

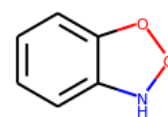

0.023959

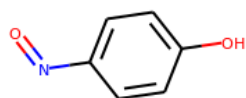

0.025189

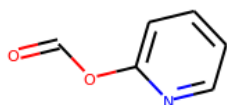

0.02572

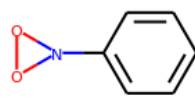

0.026606

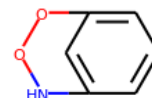

0.027178

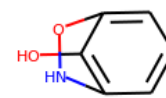

0.027365

| Top predicted substructures      | prob   |                                           |        |
|----------------------------------|--------|-------------------------------------------|--------|
| [#6H1]                           | 0.9999 | [#6X3H1][#6X3H0]                          | 0.9854 |
| [#6X3][#6X3]                     | 0.9999 | [cX3H1]([cX3H1])[cX3H0]                   | 0.9823 |
| [#6X3][#6X3][#6X3][#6X3]         | 0.9979 | [#7][#6][#6X3]                            | 0.9737 |
| [cH][cH]                         | 0.9959 | [cX3H1]([cX3H1])[cX3H1]                   | 0.9459 |
| [cH]                             | 0.9906 | [#7][#6][#6][#6X3]                        | 0.936  |
| best positives                   | prob   | best negatives                            | prob   |
| [#6H1]                           | 0.9999 | [CX4H0]([CX4H3])([CX4H2])([CX4H2])[CX3H0] | 0.0    |
| [#6X3][#6X3]                     | 0.9999 | [#6H3][#7][#6X4H1][#6H3]                  | 0.0    |
| [#6X3][#6X3][#6X3][#6X3]         | 0.9979 | [CX3H0](=[CX3H2])([CX4H3])[CX4H2]         | 0.0    |
| [cH][cH]                         | 0.9959 | [CX3H0](=[CX3H2])([CX4H2])[CX4H2]         | 0.0    |
| [cH]                             | 0.9906 | [OX2H1][CX4H2][CX4H1]([CX4H2])[CX4H2]     | 0.0    |
| [#6X3H1][#6X3H0]                 | 0.9854 | [OX2H0][CX4H2][CX4H2][CX4H1][OX2H0]       | 0.0    |
| [cX3H1]([cX3H1])[cX3H0]          | 0.9823 | [OX1H0]=[CX3H0]1[CX4H1][CX4H1][CX4H2]1    | 0.0    |
| [#7][#6][#6X3]                   | 0.9737 | [CX4H1r6][CX4H2r6][CX4H2r6][OX2H0r6]      | 0.0    |
| [cX3H1]([cX3H1])[cX3H1]          | 0.9459 | [CX4H0]([NX3H1])([CX4H3])([CX4H2])[CX4H1] | 0.0    |
| [#7][#6][#6][#6X3]               | 0.936  | [CX3H0](=[CX3H2])([CX4H2])[CX4H0]         | 0.0    |
| worst negatives                  | prob   | worst positives                           | prob   |
| [#6X3H1][#6X3H1][#6X3H0][#6X3H1] | 0.6739 | [CX3](=O)[OX2H1]                          | 0.3303 |
| [#8][#6H0][#6H1]                 | 0.6009 | [CX3](=[OX1])O                            | 0.4173 |
| [#8]=[#6H0][#6H1]                | 0.4033 | [#7][#6H0][#6H1]                          | 0.6587 |
| [cH]cO                           | 0.362  | [#7][#6X3H0][#6X3H1]                      | 0.6808 |
| [OX2H][cX3]:[c]                  | 0.2602 | [#8]=[#6][#8]                             | 0.7033 |
| [#6]1[#6][#6][#6][#6][#6]1       | 0.2469 | [OX2H1]                                   | 0.7728 |
| [#8][#6H][#6X3][#6X3H]           | 0.2368 | [#6X3][#7][#6X3]                          | 0.792  |
| o[cH]                            | 0.2277 | [#8][#6][#6][#6X3]                        | 0.8158 |
| [#8][#6H1][#6H1]                 | 0.2194 | [#6]1[#6][#6][#6][#6][#7]1                | 0.816  |
| [OX1H0]=[cX3H0][cX3H1]           | 0.1811 | [cX3H1]([nX2H0])[cX3H1]                   | 0.834  |

---

Example 41 true smiles: O=C(O)c1ccccn1 formula: C6H5NO2  
Index of correct structure: -1 of 10337  
True structure loss: 0.013704  
True structure:

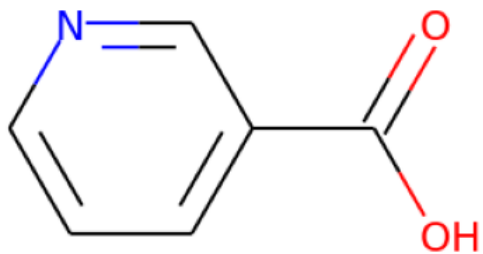

Experimental  $^{13}\text{C}$  NMR (solvent: DMSO-d6)

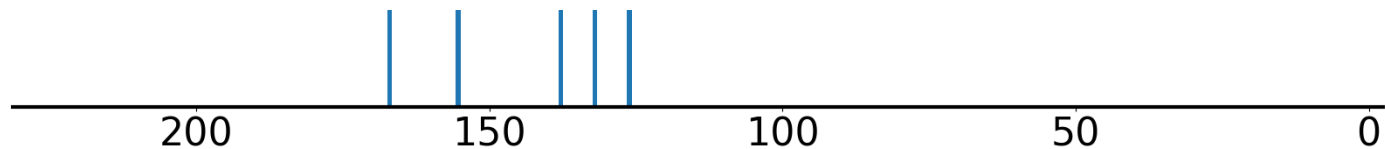

Experimental  $^1\text{H}$  NMR (solvent: D2O)

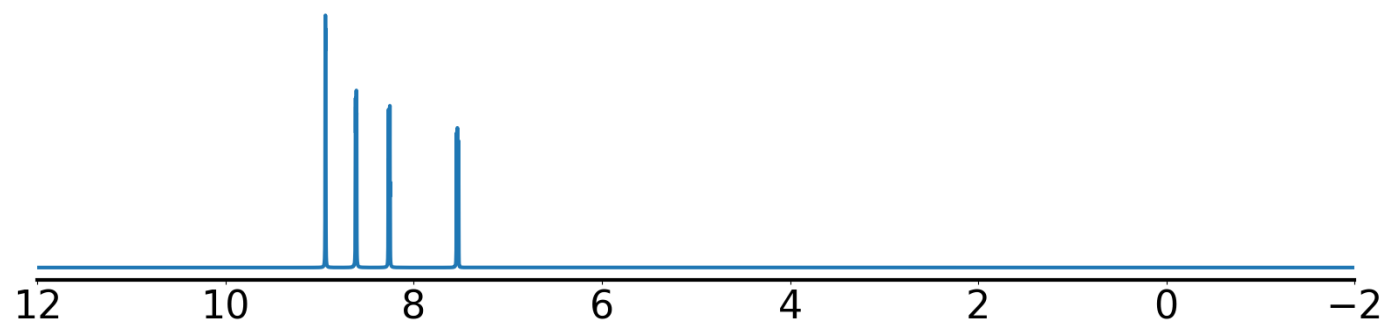

Top predicted structures (loss):



0.019113

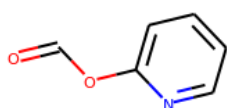

0.022086

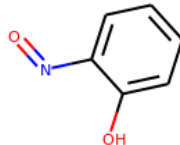

0.026728

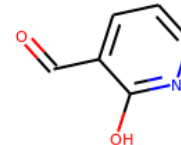

0.026819

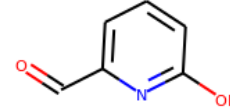

0.028933

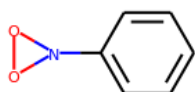

0.02929

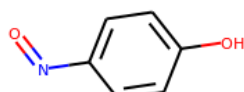

0.029411

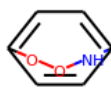

0.030296

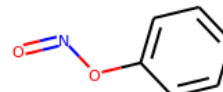

0.030497

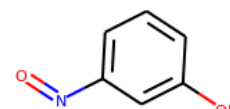

0.031821

|                                  |        |                                           |        |
|----------------------------------|--------|-------------------------------------------|--------|
| Top predicted substructures      | prob   |                                           |        |
| [#6H1]                           | 1.0    | [#6X3H1][#6X3H0]                          | 0.9764 |
| [#6X3][#6X3]                     | 0.9997 | [#6X3][#6X3][#6X3][#6X3]                  | 0.9601 |
| [#7][#6][#6][#6X3]               | 0.9848 | [cH][cH]                                  | 0.9597 |
| [#7][#6][#6X3]                   | 0.9844 | [#6H1][#7][#6H1]                          | 0.8798 |
| [cH]                             | 0.9829 | [cX3H1]([nX2H0])[cX3H0]                   | 0.8575 |
| best positives                   | prob   | best negatives                            | prob   |
| [#6H1]                           | 1.0    | [OX2H0]1[CX4H2][CX4H2][CX4H1][CX4H1]1     | 0.0    |
| [#6X3][#6X3]                     | 0.9997 | [OX2H0][CX4H2][CX4H1]([CX4H1])[CX4H1]     | 0.0    |
| [#7][#6][#6][#6X3]               | 0.9848 | [CX4H0]([OX2H0])([CX4H3])([CX4H2])[CX4H1] | 0.0    |
| [#7][#6][#6X3]                   | 0.9844 | [OX1H0]=[CX3H0]1[CX4H1][CX4H1][CX4H2]1    | 0.0    |
| [cH]                             | 0.9829 | [CX4H0]([CX4H3])([CX4H2])([CX4H1])[CX4H1] | 0.0    |
| [#6X3H1][#6X3H0]                 | 0.9764 | [CX4H0]([OX2H1])([CX4H3])([CX4H2])[CX4H1] | 0.0    |
| [#6X3][#6X3][#6X3][#6X3]         | 0.9601 | [OX2H0][CX4H2][CX4H1]([CX4H1])[CX4H3]     | 0.0    |
| [cH][cH]                         | 0.9597 | [#8][#6H1][#6H2][#6H1]=[#8]               | 0.0    |
| [#6H1][#7][#6H1]                 | 0.8798 | [CX4H1]([NX3H2])([CX4H2])[CX3H1]          | 0.0    |
| [cX3H1]([nX2H0])[cX3H0]          | 0.8575 | [OX2H1][CX4H2][CX4H1]([CX4H2])[CX4H2]     | 0.0    |
| worst negatives                  | prob   | worst positives                           | prob   |
| [cH]cO                           | 0.4969 | [CX3](=O)[OX2H1]                          | 0.0398 |
| [#7][#6H0][#6H1]                 | 0.429  | [OX2H1]                                   | 0.4263 |
| [#8][#6H0][#6H1]                 | 0.4127 | [#6X3H1][#6X3H1][#6X3H0][#6X3H1]          | 0.6266 |
| [#7][#6X3H0][#6X3H1]             | 0.357  | [#6]1[#6][#6][#6][#6][#7]1                | 0.6847 |
| [#6]1[#6][#6][#6][#6][#6]1       | 0.3183 | [cX3H1]([nX2H0])[cX3H1]                   | 0.6865 |
| [OX2H][cX3]:[c]                  | 0.2553 | O=[#6][#6][#6X3]                          | 0.6931 |
| O=[cX3]                          | 0.168  | [#8]=[#6][#8]                             | 0.7289 |
| [#7H][#6X3H1]                    | 0.1393 | [#6H1][#6H1]                              | 0.7302 |
| [cX3H0]([cX3H1])([cX3H0])[OX2H1] | 0.1244 | [CX3](=[OX1])O                            | 0.7675 |
| o[cH]                            | 0.1183 | [cX3H1]([cX3H1])[cX3H1]                   | 0.7856 |

---

Example 42 true smiles: CCCCCC(=O)O formula: C8H16O2  
Index of correct structure: 0 of 9984  
True structure loss: 0.006326  
True structure:

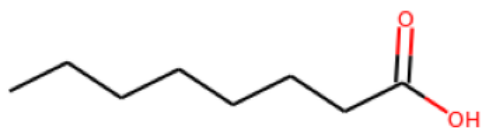

Experimental <sup>13</sup>C NMR (solvent: CDCl<sub>3</sub>)

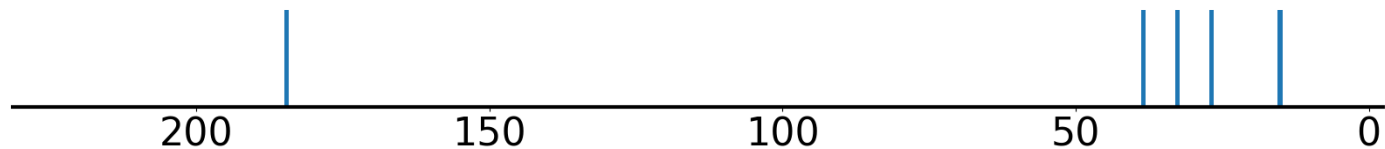

Experimental <sup>1</sup>H NMR (solvent: D<sub>2</sub>O)

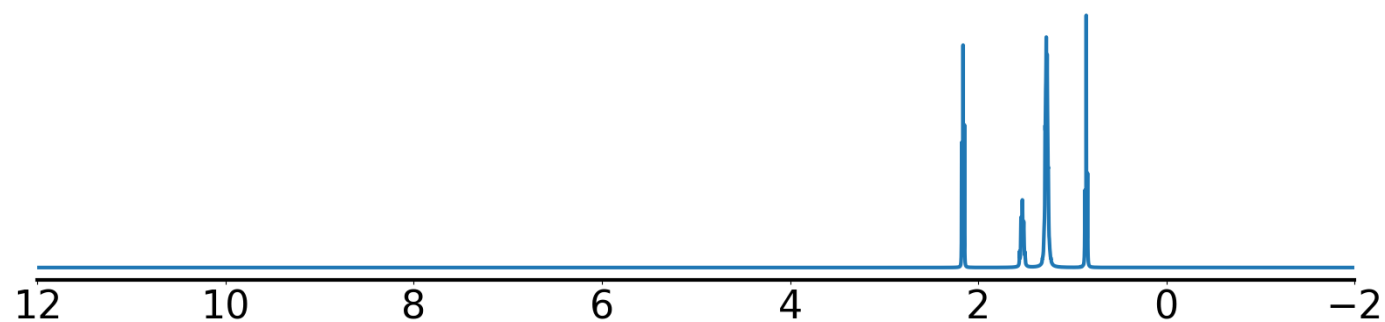

Top predicted structures (loss):

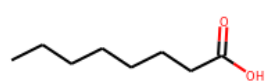

0.006326

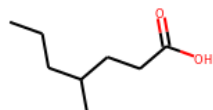

0.024303

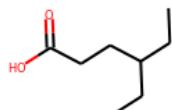

0.027016

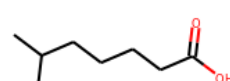

0.028162

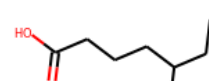

0.030015

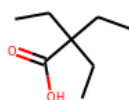

0.036825

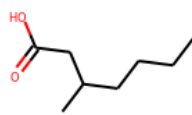

0.044071

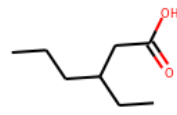

0.044708

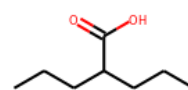

0.045575

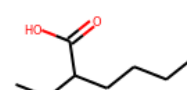

0.049083

|                                   |        |                                   |        |
|-----------------------------------|--------|-----------------------------------|--------|
| Top predicted substructures       | prob   |                                   |        |
| [CX4H2]([#6])[#6]                 | 0.9999 | [CX4H3]                           | 0.9986 |
| [#6H3][#6][#6]                    | 0.9999 | [CX3](=O)[OX2H1]                  | 0.9972 |
| [CX4H3][#6]                       | 0.9996 | [CX3](=[OX1])O                    | 0.9763 |
| [CX4H3][CX4H2]                    | 0.999  | [CX4H2][CX4H2][CX4H2][CX4H2]      | 0.9679 |
| [CX3](=[OX1])C                    | 0.9987 | [OX2H1]                           | 0.9673 |
| best positives                    | prob   | best negatives                    | prob   |
| [CX4H2]([#6])[#6]                 | 0.9999 | [CX2H0](#[CX2H1])[CX3H0]          | 0.0    |
| [#6H3][#6][#6]                    | 0.9999 | [CX2H0](#[CX2H1])[CX4H0]          | 0.0    |
| [CX4H3][#6]                       | 0.9996 | [#6X2][#6H1][#6X2]                | 0.0    |
| [CX4H3][CX4H2]                    | 0.999  | [CX3H0](=[CX3H1])([OX2H0])[CX2H0] | 0.0    |
| [CX3](=[OX1])C                    | 0.9987 | CC#CCC#C                          | 0.0    |
| [CX4H3]                           | 0.9986 | [CX2H0](#[CX2H0])[CX2H0]          | 0.0    |
| [CX3](=O)[OX2H1]                  | 0.9972 | [CX2H1]#[CX2H0][CX3H1]=[CX3H0]    | 0.0    |
| [CX3](=[OX1])O                    | 0.9763 | CCC#CC#C                          | 0.0    |
| [CX4H2][CX4H2][CX4H2][CX4H2]      | 0.9679 | CC=CC#CC                          | 0.0    |
| [OX2H1]                           | 0.9673 | C=CC=CC#C                         | 0.0    |
| worst negatives                   | prob   | worst positives                   | prob   |
| [#6H1][#6H2]                      | 0.4448 | [OX1H0]=[CX3H0]([#8])[CX4H2]      | 0.6574 |
| [#6H1]                            | 0.3232 | [#8][#6][#6H2]                    | 0.6788 |
| [CX3H0](=[OX1H0])([OX2H1])[CX4H1] | 0.2239 | O=[CX3H0][CX4H2][CX4H2]           | 0.7064 |
| [CHX4](CH3X4)[CH2X4]              | 0.1533 | [CX4H2][CX3]=O                    | 0.7251 |
| [CX4H3][CX4H1]                    | 0.1484 | [CX4H2]CC=O                       | 0.7729 |
| [CX4H2]([CX4H2])[CX4H1]           | 0.1437 | CCCCC                             | 0.8335 |
| [#6H3][#6H0]                      | 0.1234 | OCC[CH2]                          | 0.838  |
| [#6H1]([#6H2])[#6H2]              | 0.1131 | [CX4H2]([CX4H2])[CX3H0]           | 0.8454 |
| [CX4H1]([CX4H3])([CX4H3])[CX4H2]  | 0.1007 | [CX4H2]([CX4H3])[CX4H2]           | 0.8628 |
| [#6X3][#6][#6H3]                  | 0.096  | [CX3H0](=[OX1H0])([OX2H1])[CX4H2] | 0.8756 |

---

Example 43 true smiles: NCCc1c[nH]cn1 formula: C5H9N3  
Index of correct structure: 1 of 8824  
True structure loss: 0.022963  
True structure:

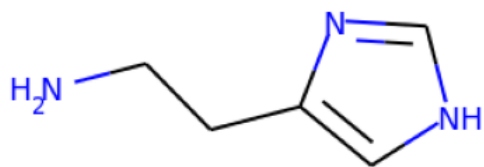

Experimental <sup>13</sup>C NMR (solvent: D2O)

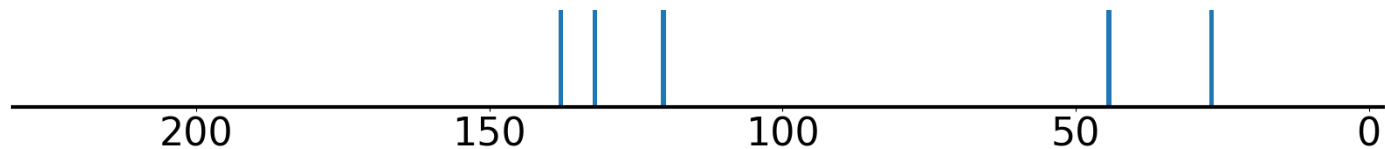

Experimental <sup>1</sup>H NMR (solvent: D2O)

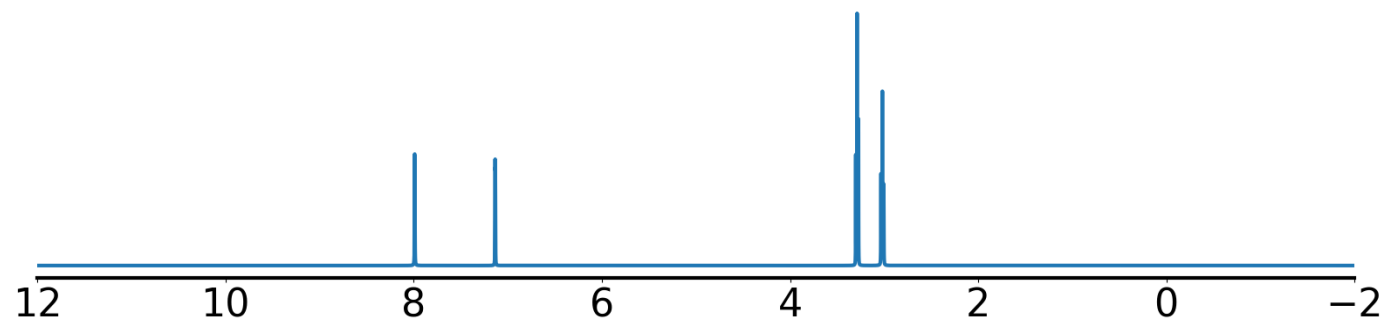

Top predicted structures (loss):

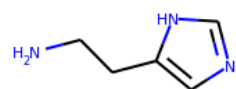

0.021891

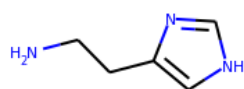

0.022963

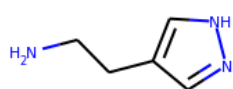

0.024396

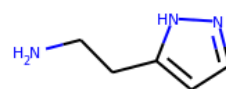

0.032793

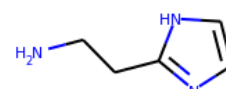

0.033342

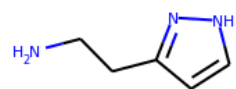

0.035301

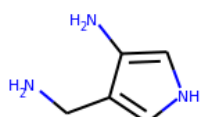

0.052169

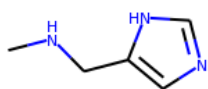

0.052178

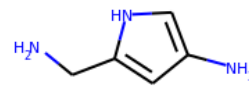

0.052482

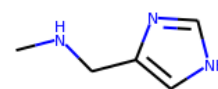

0.05325



| Top predicted substructures | prob        |                                       |             |
|-----------------------------|-------------|---------------------------------------|-------------|
| [#6H1]                      | 0.9983      | [#6X3][#6X3]                          | 0.9092      |
| [CX4H2]([#6])[#6]           | 0.9917      | [#7X3][#6H2]                          | 0.878       |
| [cH]                        | 0.9369      | [#7][#6][#6][#6X3]                    | 0.8601      |
| [#7X3H2]                    | 0.9196      | [#7][#6][#6X3]                        | 0.829       |
| [#7][#6H2][#6H2]            | 0.9176      | [#7][#6H2]                            | 0.8177      |
| <b>best positives</b>       | <b>prob</b> | <b>best negatives</b>                 | <b>prob</b> |
| [#6H1]                      | 0.9983      | [OX2H0]1[CX4H2][CX4H1][CX4H1]1        | 0.0         |
| [CX4H2]([#6])[#6]           | 0.9917      | [OX2H0]1[CX4H2][CX4H2][CX4H1][CX4H1]1 | 0.0         |
| [cH]                        | 0.9369      | [OX2H0][CX4H2][CX4H1]([CX4H1])[CX4H3] | 0.0         |
| [#7X3H2]                    | 0.9196      | [CX2H0](#[CX2H0])[CX2H0]              | 0.0         |
| [#7][#6H2][#6H2]            | 0.9176      | [OX2H0][CX4H2][CX4H2][CX4H1][OX2H0]   | 0.0         |
| [#6X3][#6X3]                | 0.9092      | [#6]1[#8][#6][#6]1=[#8]               | 0.0         |
| [#7X3][#6H2]                | 0.878       | [OX2H1][CX4H1]1[CX4H1][CX4H2][CX4H1]1 | 0.0         |
| [#7][#6][#6][#6X3]          | 0.8601      | [CX4H1]([OX2H0])([CX4H3])[CX4H0]      | 0.0         |
| [#7][#6][#6X3]              | 0.829       | [CX3H0](=[OX1H0])([CX4H1])[CX4H0]     | 0.0         |
| [#7][#6H2]                  | 0.8177      | [#8][#6H1][#6H2][#6H1]=[#8]           | 0.0         |
| <b>worst negatives</b>      | <b>prob</b> | <b>worst positives</b>                | <b>prob</b> |
| [cX3H1]([nX2H0])[cX3H0]     | 0.5003      | [#7][#6][#6][#6][#6][#7]              | 0.2249      |
| [#7][#7]                    | 0.4353      | [cX3H1]([nX3H1])[cX3H0]               | 0.2641      |
| [#7X3H0]                    | 0.3889      | [#7][#6X3H0][#6X3H1]                  | 0.2764      |
| [#6X3H1][#7X3H0]            | 0.2955      | [#7][#6H0][#6H1]                      | 0.3113      |
| [cH][cH]                    | 0.2886      | [#6X3][#7X3][#6X3]                    | 0.3797      |
| [CX4H2][CX3H]               | 0.2386      | [#6X3][#7][#6X3]                      | 0.4547      |
| [#6H2][#7][#6X3]            | 0.2327      | [#7H][#6X3H1]                         | 0.4658      |
| [CX4H3]                     | 0.2311      | [#6]1[#6][#7][#6][#7]1                | 0.4963      |
| [CX4H2]([NX3H1])[CX4H2]     | 0.2053      | [#6H1][#7][#6H1]                      | 0.5013      |
| [#7][#7H1]                  | 0.1818      | [#7][#6][#6][#7]                      | 0.5562      |

---

Example 44 true smiles: CC(O)(CCO)CC(=O)O formula: C6H12O4  
 Index of correct structure: 6 of 8605  
 True structure loss: 0.047542  
 True structure:

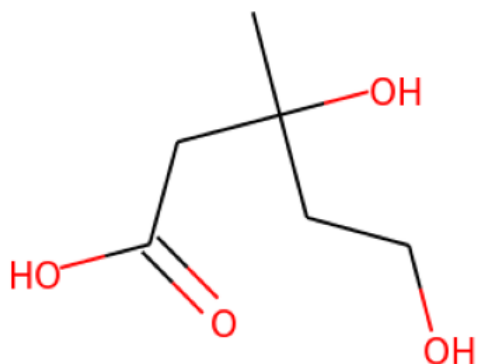

Experimental <sup>13</sup>C NMR (solvent: CDCl<sub>3</sub>)

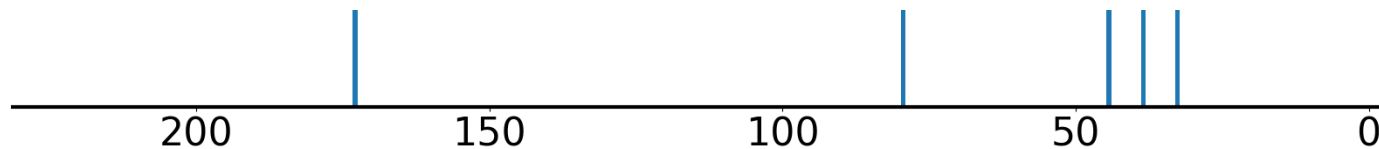

Experimental <sup>1</sup>H NMR (solvent: D<sub>2</sub>O)

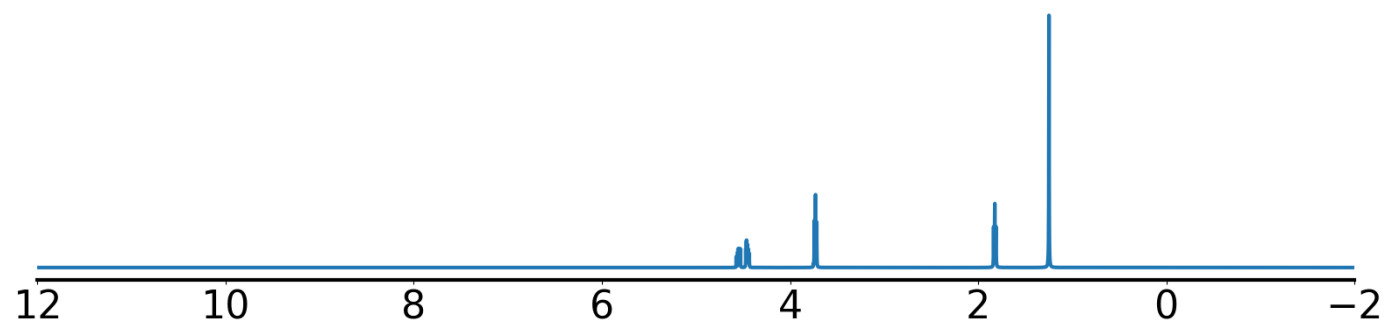

Top predicted structures (loss):

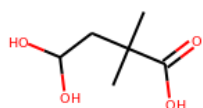

0.038973

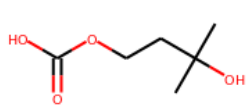

0.044147

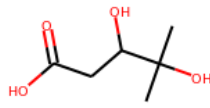

0.044396

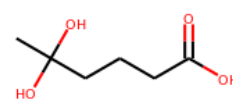

0.046009

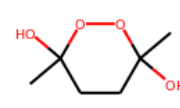

0.046128

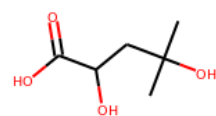

0.046747

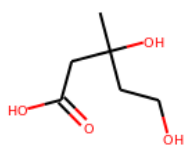

0.047542

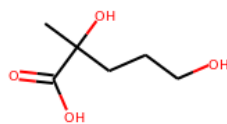

0.048719

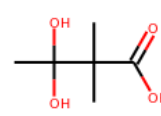

0.049301

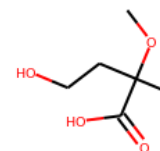

0.049788

|                                   |        |                                   |        |
|-----------------------------------|--------|-----------------------------------|--------|
| Top predicted substructures       | prob   |                                   |        |
| [#8]=[#6][#8]                     | 0.9998 | [CX4H3][CX4H0]                    | 0.9767 |
| [#6H3][#6][#6]                    | 0.9996 | [CX4H3]                           | 0.9765 |
| [OX2H1]                           | 0.9994 | [#8][#6][#6H2]                    | 0.9746 |
| [CX3](=[OX1])O                    | 0.9981 | [#6H3][#6H0]                      | 0.9675 |
| OCC[CH2]                          | 0.9786 | [CX4H3][#6]                       | 0.9652 |
| best positives                    | prob   | best negatives                    | prob   |
| [#8]=[#6][#8]                     | 0.9998 | CCC#CC#C                          | 0.0    |
| [#6H3][#6][#6]                    | 0.9996 | CC=CC#CC                          | 0.0    |
| [OX2H1]                           | 0.9994 | [#6X2][#6H1][#6X2]                | 0.0    |
| [CX3](=[OX1])O                    | 0.9981 | CCC#CC=C                          | 0.0    |
| OCC[CH2]                          | 0.9786 | [CX2H1]#[CX2H0][CX3H1]=[CX3H0]    | 0.0    |
| [CX4H3][CX4H0]                    | 0.9767 | [#7][#6]=[#6][#6][#7]             | 0.0    |
| [CX4H3]                           | 0.9765 | [CX3H0](=[CX3H1])([OX2H0])[CX2H0] | 0.0    |
| [#8][#6][#6H2]                    | 0.9746 | [CX2H0](#[CX2H0])[CX2H0]          | 0.0    |
| [#6H3][#6H0]                      | 0.9675 | [CX3H1](=[CX3H2])[CX2H0]          | 0.0    |
| [CX4H3][#6]                       | 0.9652 | [CX2H0](#[CX2H1])[CX3H0]          | 0.0    |
| worst negatives                   | prob   | worst positives                   | prob   |
| [#6H1][#6H2]                      | 0.8107 | [OX2H1][CX4H0][CX4H2][CX3H0]      | 0.0341 |
| [OH][CX4H]                        | 0.8098 | [CH2X4](O)[CX4H2]                 | 0.0486 |
| [#6H1]                            | 0.71   | [OX1H0]=[CX3H0][CX4H2][CX4H0]     | 0.0732 |
| [#8][#6][#6][#6][#6][#8]          | 0.6329 | [CX4H2](=[OX2H1])[CX4H2]          | 0.0746 |
| [#6X4H2][#6H1][#8H]               | 0.6155 | [#8X1]=[#6X3][#6H2][#6H0]         | 0.0878 |
| [CH3]CC[OH]                       | 0.55   | [#6X3][#6][#6][#6H3]              | 0.1341 |
| [#8][#6H0][#6H1]                  | 0.5262 | [CX4H2](=[CX4H0])[CX3H0]          | 0.1563 |
| [CX3H0](=[OX1H0])([OX2H1])[CX4H1] | 0.5178 | [#6H3][#6H0](=[#6H2])[#6H2]       | 0.1825 |
| [#8H][#6X4H1][#6X3H0]             | 0.4365 | [#8][#6][#6][#6X3]                | 0.1873 |
| O[CX4H][CX4H2]                    | 0.4348 | [OX1H0]=[CX3H0](=[#8])[CX4H2]     | 0.2188 |

---

Example 45 true smiles: O=C(O)CCC(O)C(=O)O formula: C5H8O5  
Index of correct structure: 1 of 8115  
True structure loss: 0.028053  
True structure:

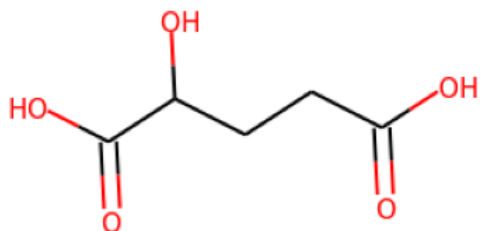

Experimental <sup>13</sup>C NMR (solvent: D2O)

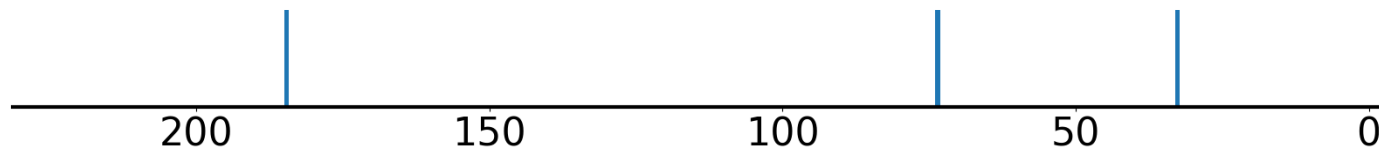

Experimental <sup>1</sup>H NMR (solvent: D2O)

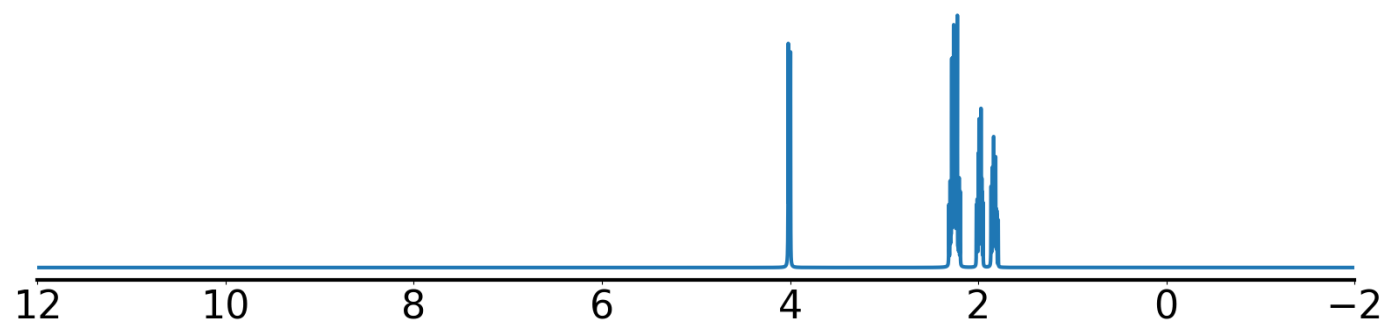

Top predicted structures (loss):

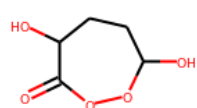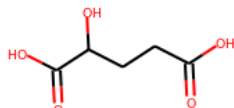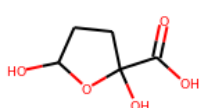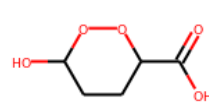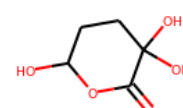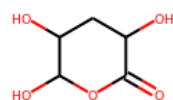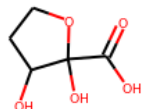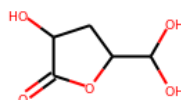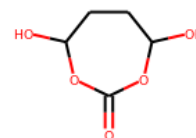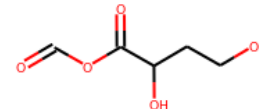

|                                  |        |                                   |        |
|----------------------------------|--------|-----------------------------------|--------|
| Top predicted substructures      | prob   |                                   |        |
| [CX4H2]([#6])[#6]                | 0.9993 | [CX3](=[OX1])O                    | 0.9786 |
| [CX3](=[OX1])C                   | 0.9979 | [#8][#6][#6H2]                    | 0.9463 |
| [OX2H1]                          | 0.9968 | [#6H1]                            | 0.9449 |
| OCC[CH2]                         | 0.9962 | [#8][#6][#6]=[#8]                 | 0.9435 |
| [#8]=[#6][#8]                    | 0.9805 | [#6H1][#6H2]                      | 0.9345 |
| best positives                   | prob   | best negatives                    | prob   |
| [CX4H2]([#6])[#6]                | 0.9993 | [CX2H1]#[CX2H0][CX3H1]=[CX3H0]    | 0.0    |
| [CX3](=[OX1])C                   | 0.9979 | [#6H3][#6X3][#6X3]=[#6X3H2]       | 0.0    |
| [OX2H1]                          | 0.9968 | [#6X3H2]=[#6][#6H2][#8H]          | 0.0    |
| OCC[CH2]                         | 0.9962 | [#7][#6]=[#6][#6][#6]=[#7]        | 0.0    |
| [#8]=[#6][#8]                    | 0.9805 | CC#CCC=C                          | 0.0    |
| [CX3](=[OX1])O                   | 0.9786 | CC=CCC#C                          | 0.0    |
| [#8][#6][#6H2]                   | 0.9463 | [CX3H0](=[CX3H2])([CX4H3])[CX4H2] | 0.0    |
| [#6H1]                           | 0.9449 | [CX2H0](#[CX2H1])[CX4H0]          | 0.0    |
| [#8][#6][#6]=[#8]                | 0.9435 | C=CC=CC#C                         | 0.0    |
| [#6H1][#6H2]                     | 0.9345 | [#6H3][#6H1][#6H1]=[#7]           | 0.0    |
| worst negatives                  | prob   | worst positives                   | prob   |
| [#6H1][#6H1]                     | 0.4845 | O=[CX3H0][CX4H2][CX4H2]           | 0.0235 |
| [CX4H1]([OX2H1])([CX4H2])[CX4H1] | 0.4505 | [CX4H2]([CX4H2])[CX3H0]           | 0.0243 |
| [#8][#6][#6][#6X3]               | 0.2572 | [OX1H0]=[CX3H0]([#8])[CX4H2]      | 0.0271 |
| O[CX4H]([CX4H2])[CX4H1]          | 0.2434 | [CX3H0](=[OX1H0])([OX2H1])[CX4H2] | 0.0532 |
| [#6H1]([#6H2])[#6H2]             | 0.2176 | [CX4H2][CX3]=O                    | 0.1769 |
| [#8][#6H1][#6H1]                 | 0.2031 | [#8][#6][#6][#6][#6]=[#8]         | 0.3892 |
| [#8]=[#6][#6H1][#6H1]            | 0.1938 | [CX3H0](=[OX1H0])([OX2H1])[CX4H1] | 0.5714 |
| CCCCC                            | 0.1754 | [#8][#6][#6][#6][#6][#8]          | 0.6148 |
| [OX2H1][CX4H1][CX4H1][OX2H1]     | 0.1595 | [#8H][#6X4H1][#6X3H0]             | 0.7179 |
| [CX4H2]([OX2H0])[CX4H2]          | 0.1491 | [CX3](=O)[OX2H1]                  | 0.718  |

---

Example 46 true smiles: O=C(O)CCC(=O)C(=O)O formula: C5H6O5  
 Index of correct structure: 0 of 7597  
 True structure loss: 0.008162  
 True structure:

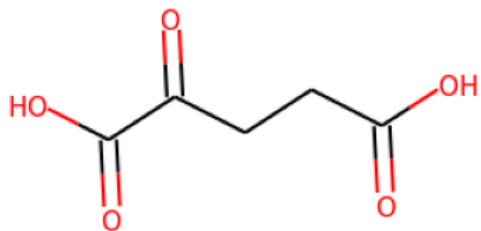

Experimental <sup>13</sup>C NMR (solvent: DMSO)

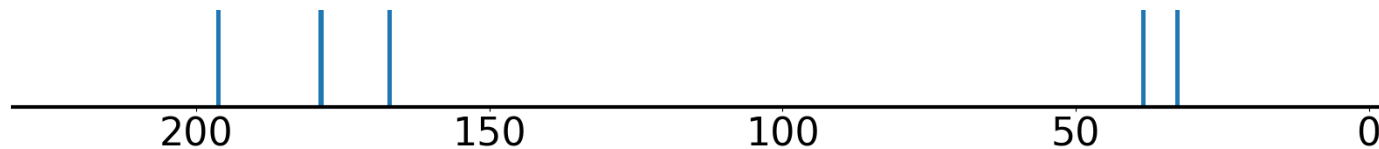

Experimental <sup>1</sup>H NMR (solvent: d2o)

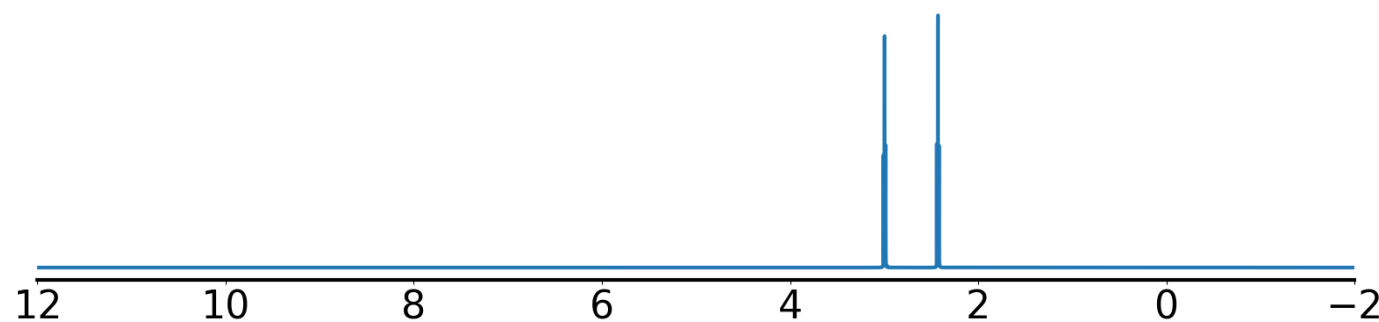

Top predicted structures (loss):

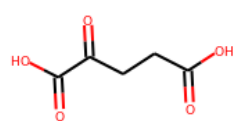

0.008162

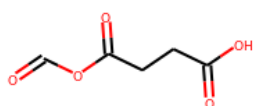

0.042883

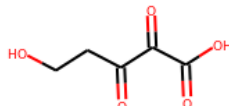

0.049861

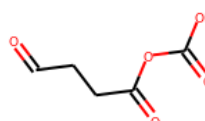

0.049914

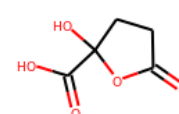

0.06086

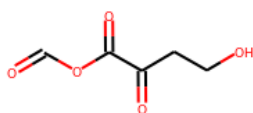

0.062934

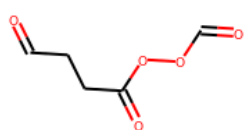

0.064672

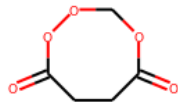

0.066055

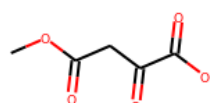

0.068078

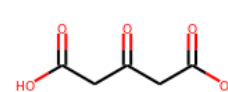

0.069021

|                                   |        |                                   |        |
|-----------------------------------|--------|-----------------------------------|--------|
| Top predicted substructures       | prob   |                                   |        |
| [CX3](=[OX1])C                    | 1.0    | O=[CX3H0][CX4H2][CX4H2]           | 0.9903 |
| [CX4H2]([#6])[#6]                 | 0.9999 | [CX4H2][CX3]=O                    | 0.9811 |
| [CX3](=[OX1])O                    | 0.9997 | OCC[CH2]                          | 0.9543 |
| [#8]=[#6][#8]                     | 0.9986 | [CX4H2]CC=O                       | 0.9518 |
| [CX4H2]([CX4H2])[CX3H0]           | 0.9938 | [#8]=[#6][#6]=[#8]                | 0.9427 |
| best positives                    | prob   | best negatives                    | prob   |
| [CX3](=[OX1])C                    | 1.0    | [CX2H0](#[CX2H1])[CX4H0]          | 0.0    |
| [CX4H2]([#6])[#6]                 | 0.9999 | [CX4H1]([CX4H1])([CX4H1])[CX2H0]  | 0.0    |
| [CX3](=[OX1])O                    | 0.9997 | [#6X2][#6H1][#6X2]                | 0.0    |
| [#8]=[#6][#8]                     | 0.9986 | C=CC=CC#C                         | 0.0    |
| [CX4H2]([CX4H2])[CX3H0]           | 0.9938 | CCC#CC#C                          | 0.0    |
| O=[CX3H0][CX4H2][CX4H2]           | 0.9903 | CC#CCC#C                          | 0.0    |
| [CX4H2][CX3]=O                    | 0.9811 | [CX3H0](=[CX3H1])([CX4H1])[CX2H0] | 0.0    |
| OCC[CH2]                          | 0.9543 | [OX2H0][CX4H2][CX2H0]#[CX2H1]     | 0.0    |
| [CX4H2]CC=O                       | 0.9518 | [CX2H0](#[CX2H1])[CX2H0]          | 0.0    |
| [#8]=[#6][#6]=[#8]                | 0.9427 | CCC=CC#C                          | 0.0    |
| worst negatives                   | prob   | worst positives                   | prob   |
| [CX4H3][CX3H0]                    | 0.3481 | [#8][#6][#6][#6]=[#8]             | 0.514  |
| [CX4H3]                           | 0.3122 | [#8][#6][#6]=[#8]                 | 0.5427 |
| [OX2H0][CX3H0][CX4H2]             | 0.2447 | [#8]=[#6][#6][#6][#6]=[#8]        | 0.7041 |
| [CX3H0](=[OX1H0])([OX2H0])[CX4H2] | 0.1992 | [#6X3H0][CX4H2][CX4H2][#6X3H0]    | 0.7116 |
| [#8][#6][#6][#6X3]                | 0.1964 | [CX3H0](=[OX1H0])([OX2H1])[CX4H2] | 0.7351 |
| [OX1H0]=[CX3H0][CX4H3]            | 0.1642 | [#8][#6][#6H2]                    | 0.805  |
| O=[#6][#6][#6X3]                  | 0.1515 | [CX3H0](=[OX1H0])([OX2H1])[CX3H0] | 0.8141 |
| [#6H3][#6][#6]                    | 0.1462 | [CX3](=O)[OX2H1]                  | 0.8203 |
| [CX4H3][CX3]                      | 0.1116 | O=CC=O                            | 0.8269 |
| [#6X3][#6][#6][#6H3]              | 0.1064 | [OX2H1]                           | 0.8935 |

---

Example 47 true smiles: O=C(O)C1CCCN1 formula: C5H9NO2  
 Index of correct structure: 0 of 6935  
 True structure loss: 0.024354  
 True structure:

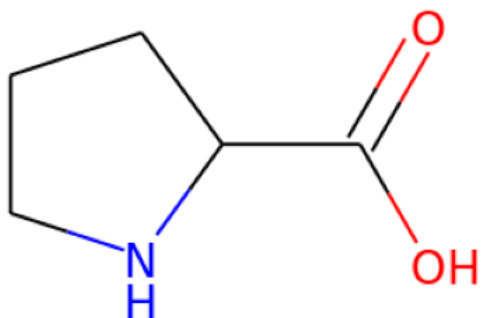

Experimental <sup>13</sup>C NMR (solvent: D2O)

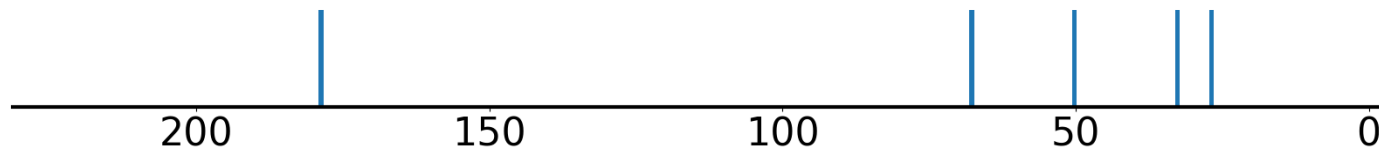

Experimental <sup>1</sup>H NMR (solvent: d2o)

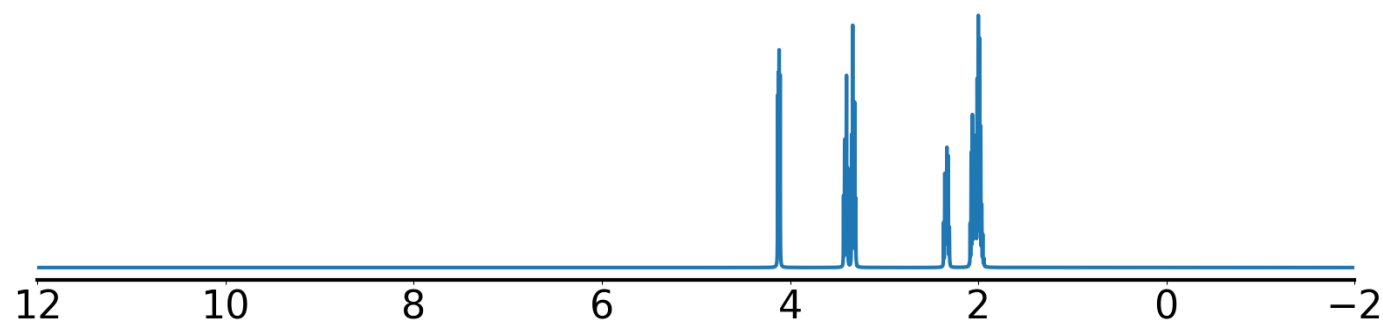

Top predicted structures (loss):

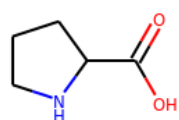

0.024354

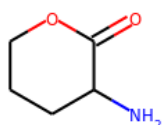

0.040611

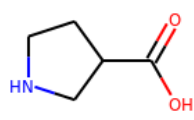

0.045086

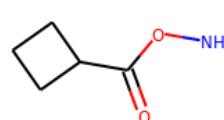

0.049682

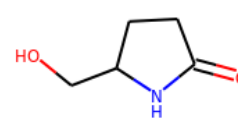

0.051446

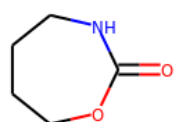

0.052438

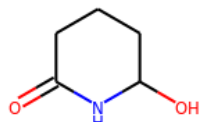

0.053394

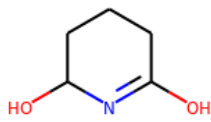

0.054517

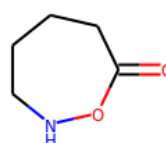

0.05542

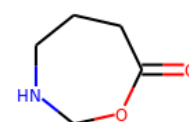

0.055889



|                             |        |                                   |        |
|-----------------------------|--------|-----------------------------------|--------|
| Top predicted substructures | prob   |                                   |        |
| [CX4H2]([#6])[#6]           | 0.9998 | [CX4H2]CC=O                       | 0.9264 |
| [CX4H2][CX4H2]              | 0.9861 | [#6H1][#6H2]                      | 0.8996 |
| [CX3](=[OX1])C              | 0.9834 | [#7X3][#6H2]                      | 0.89   |
| [CX4H2]([CX4H2])[CX4H1]     | 0.972  | [#6H1]                            | 0.8844 |
| OCC[CH2]                    | 0.9593 | O=[CX3][CX4H]                     | 0.8749 |
| best positives              | prob   | best negatives                    | prob   |
| [CX4H2]([#6])[#6]           | 0.9998 | [CX2H1]#[CX2H0][CX3H1]=[CX3H0]    | 0.0    |
| [CX4H2][CX4H2]              | 0.9861 | [CX3H0](=[CX3H1])([CX4H2])[CX2H0] | 0.0    |
| [CX3](=[OX1])C              | 0.9834 | CC=CC#C                           | 0.0    |
| [CX4H2]([CX4H2])[CX4H1]     | 0.972  | [#6X3][#6]#[#6][#6H3]             | 0.0    |
| OCC[CH2]                    | 0.9593 | CC=CC#C                           | 0.0    |
| [CX4H2]CC=O                 | 0.9264 | [CX3H1](=[CX3H1])[CX2H0]          | 0.0    |
| [#6H1][#6H2]                | 0.8996 | [#6H3][#6X3][#6X3]=[#6X3H2]       | 0.0    |
| [#7X3][#6H2]                | 0.89   | C=CC=CC#C                         | 0.0    |
| [#6H1]                      | 0.8844 | [CX2H0](#[CX2H0])[CX4H0]          | 0.0    |
| O=[CX3][CX4H]               | 0.8749 | [CX3H0](=[CX3H1])([CX4H1])[CX2H0] | 0.0    |
| worst negatives             | prob   | worst positives                   | prob   |
| [CX4H2]([#6])[O]            | 0.5716 | [#6H1r5][#7]                      | 0.2458 |
| [CH2X4](O)[CX4H2]           | 0.4952 | [CX3](=O)[OX2H1]                  | 0.3091 |
| [#8][#6][#6H2]              | 0.4821 | [#6]1[#6][#6][#6][#7]1            | 0.3217 |
| [#7X3H2]                    | 0.4455 | [#7H1][#6X4H1][#6X3]              | 0.393  |
| O=[CX3H0][CX4H2][CX4H2]     | 0.3793 | [CX4H2]([CX4H2])[CX4H2]           | 0.4148 |
| [CX4H2][CX3]=O              | 0.3654 | [CX3H0](=[OX1H0])([OX2H1])[CX4H1] | 0.4385 |
| [CX4H2]([OX2H0])[CX4H2]     | 0.3401 | [#7][#6H1][#6H2r5]                | 0.4651 |
| [#7H2][#6H1]                | 0.2664 | [#7X3H1]                          | 0.4668 |
| [#7][#6H0][#6H1]            | 0.2564 | [#8][#6H0][#6H1]                  | 0.5972 |
| [#7H2][#6X4H1][#6X3]        | 0.2398 | [#6H1][#6H2][#6][#6][#7]          | 0.6125 |

---

Example 48 true smiles: CCOC(=O)CC#N formula: C5H7NO2  
Index of correct structure: 0 of 6308  
True structure loss: 0.028354  
True structure:

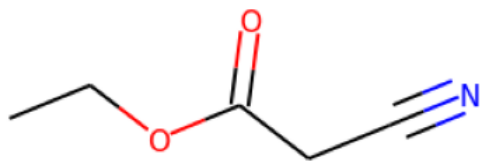

Experimental <sup>13</sup>C NMR (solvent: CDCl<sub>3</sub>)

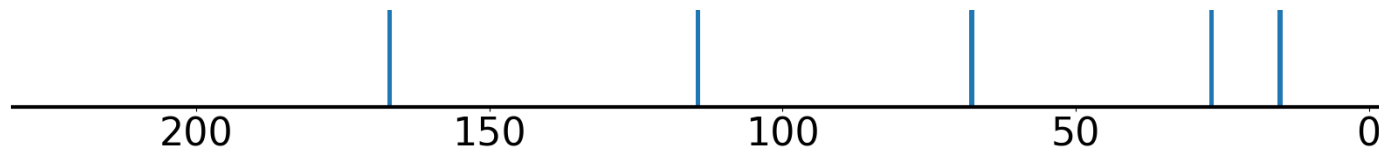

Experimental <sup>1</sup>H NMR (solvent: CDCl<sub>3</sub>)

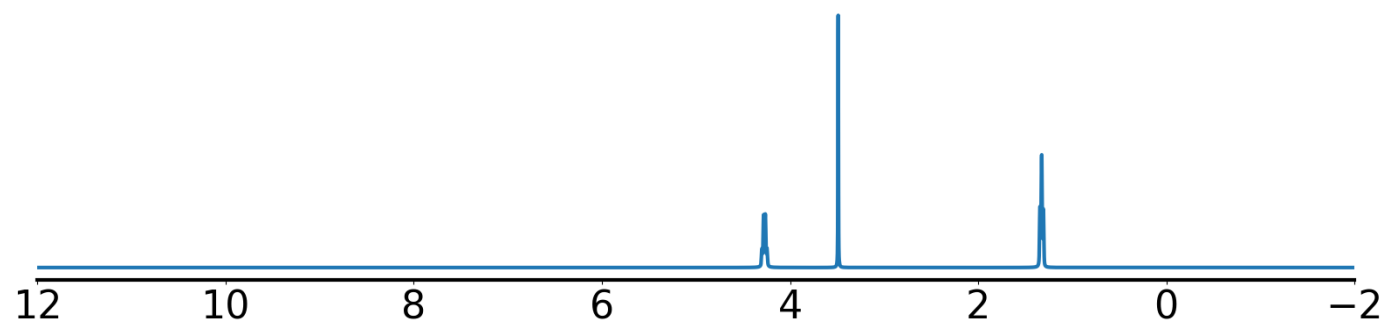

Top predicted structures (loss):

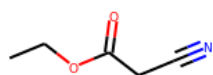

0.028354

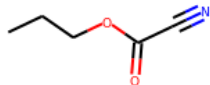

0.042572

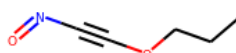

0.046532

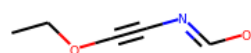

0.048316

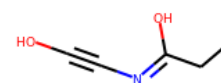

0.050451

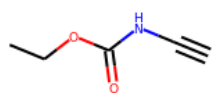

0.053284

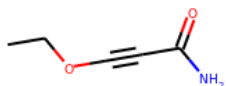

0.055955

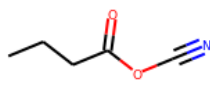

0.055974

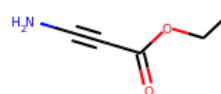

0.056476

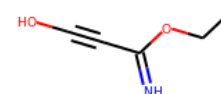

0.058853

|                             |        |                                           |        |
|-----------------------------|--------|-------------------------------------------|--------|
| Top predicted substructures | prob   |                                           |        |
| [CX4H3]                     | 0.9878 | [CX4H2]([CX3H0])[CX2H0]                   | 0.7995 |
| [CX4H3][#6]                 | 0.8479 | [#8][#6][#6H2]                            | 0.7796 |
| [#6][#7]                    | 0.8474 | [#8][#6][#6H2][#6X2]                      | 0.7432 |
| [CX2H0][CX4H2][#6X3H0]      | 0.8455 | [#6H1]                                    | 0.6899 |
| [CX4H3][CX4H2]              | 0.8052 | [CX4H2]([#6])[#6]                         | 0.6827 |
| best positives              | prob   | best negatives                            | prob   |
| [CX4H3]                     | 0.9878 | [CX3H1](=[CX3H2])[CX3H1]                  | 0.0    |
| [CX4H3][#6]                 | 0.8479 | [CX3H1](=[CX3H2])[CX4H2]                  | 0.0    |
| [#6][#7]                    | 0.8474 | [CX4H3][CX3H0][CX4H2][CX3H1]              | 0.0    |
| [CX2H0][CX4H2][#6X3H0]      | 0.8455 | [CX3H0](=[CX3H2])([CX4H2])[CX4H2]         | 0.0    |
| [CX4H3][CX4H2]              | 0.8052 | C=CC=CC#C                                 | 0.0    |
| [CX4H2]([CX3H0])[CX2H0]     | 0.7995 | [CX3H1](=[CX3H2])[CX3H0]                  | 0.0    |
| [#8][#6][#6H2]              | 0.7796 | C=CC=CC=C                                 | 0.0    |
| [#8][#6][#6H2][#6X2]        | 0.7432 | [CX4H0]([CX4H2])([CX4H2])([CX4H1])[CX4H1] | 0.0    |
| [CX4H2]([#6])[#6]           | 0.6827 | [OX1H0]=[CX3H1][CX3H0]=[CX3H2]            | 0.0    |
| [CX4H2]([OX2H0])[CX4H3]     | 0.6696 | [CX3H1](=[CX3H2])[CX2H0]                  | 0.0    |
| worst negatives             | prob   | worst positives                           | prob   |
| [#6H1]                      | 0.6899 | [CX4H2][CX3]=O                            | 0.0745 |
| [#8][#6][#6][#6X3]          | 0.4729 | [OX1H0]=[CX3H0]([#8])[CX4H2]              | 0.1265 |
| [#6H1][#6H1]                | 0.373  | [CX3H0](=[OX1H0])([OX2H0])[CX4H2]         | 0.1695 |
| [CX4H]O                     | 0.2989 | [CX4H2]([#6])[O]                          | 0.3515 |
| [#8][#6][#6][#8]            | 0.2475 | [OX2H0][CX3H0][CX4H2]                     | 0.3763 |
| [CX4H2]([OX2H0])[CX4H2]     | 0.2435 | [CX3]([OX1])O                             | 0.3783 |
| O=[CX3][CX4H]               | 0.2361 | [#8X1]=[#6X3][#6H2][#6H0]                 | 0.3915 |
| C1CC1                       | 0.2336 | [CX4H3][CX4]O                             | 0.4134 |
| [#8][#6H0][#6H1]            | 0.214  | [#6H2][#6X2]                              | 0.4931 |
| OCC[CH2]                    | 0.2077 | [#8]=[#6][#8]                             | 0.4994 |

---

Example 49 true smiles: CC(C)CC(=O)C(=O)O formula: C6H10O3  
 Index of correct structure: 0 of 6069  
 True structure loss: 0.016838  
 True structure:

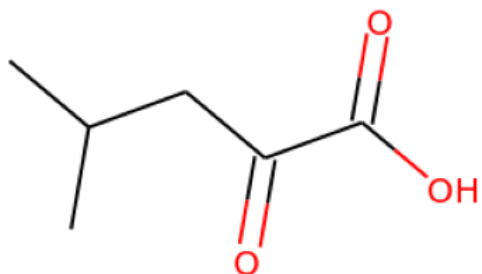

Experimental <sup>13</sup>C NMR (solvent: DMSO)

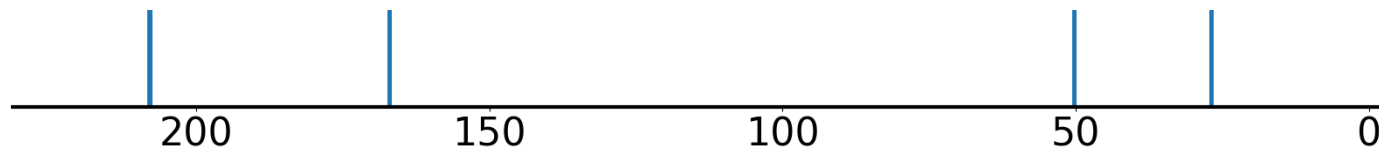

Experimental <sup>1</sup>H NMR (solvent: D2O)

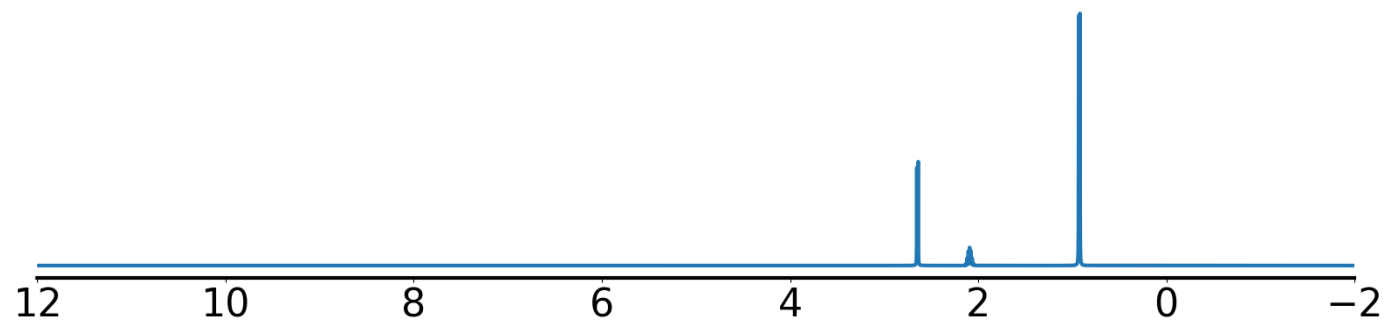

Top predicted structures (loss):

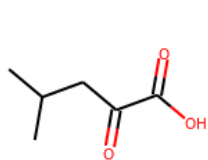

0.016838

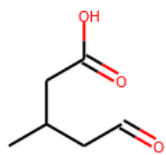

0.054685

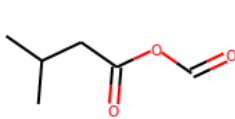

0.055422

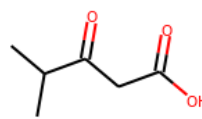

0.064634

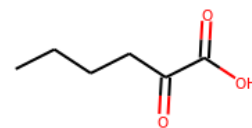

0.073687

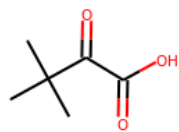

0.077413

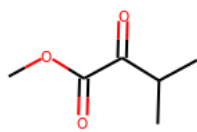

0.078502

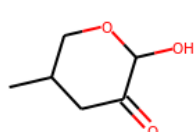

0.082401

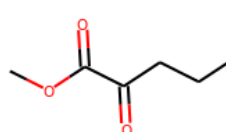

0.082986

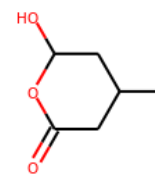

0.083879

|                                   |        |                                   |        |
|-----------------------------------|--------|-----------------------------------|--------|
| Top predicted substructures       | prob   |                                   |        |
| [CX3](=[OX1])C                    | 0.9999 | O=[CX3H0][CX4H2][CX4H1]           | 0.9608 |
| [CX4H3]                           | 0.999  | [CX4H2]([#6])([#6])               | 0.9539 |
| [#6H3][#6][#6]                    | 0.9953 | [CX3](=[OX1])O                    | 0.9525 |
| [CX4H3][#6]                       | 0.9894 | [CX4H2][CX3]=O                    | 0.95   |
| [OX1H0]=[CX3H0]([#6])[CX4H2]      | 0.9842 | [#6H1]                            | 0.9455 |
| best positives                    | prob   | best negatives                    | prob   |
| [CX3](=[OX1])C                    | 0.9999 | C=CC=CC#C                         | 0.0    |
| [CX4H3]                           | 0.999  | [CX2H0](#[CX2H0])[CX2H0]          | 0.0    |
| [#6H3][#6][#6]                    | 0.9953 | CCC#CC#C                          | 0.0    |
| [CX4H3][#6]                       | 0.9894 | [CX2H0](#[CX2H1])[CX4H0]          | 0.0    |
| [OX1H0]=[CX3H0]([#6])[CX4H2]      | 0.9842 | CC=CC#CC                          | 0.0    |
| O=[CX3H0][CX4H2][CX4H1]           | 0.9608 | CCC=CC#C                          | 0.0    |
| [CX4H2]([#6])([#6])               | 0.9539 | [CX4H3][CX2H0]                    | 0.0    |
| [CX3](=[OX1])O                    | 0.9525 | C=CCCC#C                          | 0.0    |
| [CX4H2][CX3]=O                    | 0.95   | [CX2H0](#[CX2H1])[CX3H0]          | 0.0    |
| [#6H1]                            | 0.9455 | [CX2H0](#[CX2H1])[CX4H2]          | 0.0    |
| worst negatives                   | prob   | worst positives                   | prob   |
| [#8][#6][#6H2]                    | 0.7481 | OCC[CH2]                          | 0.1562 |
| O[CX4H][CX4H2]                    | 0.4988 | [#8][#6][#6]=[#8]                 | 0.3936 |
| [#8][#6][#6][#6X3]                | 0.3854 | [CX4H2]CC=O                       | 0.397  |
| [#6H2][#8][#6H1]                  | 0.3465 | [CX3H0](=[OX1H0])([OX2H1])[CX3H0] | 0.5962 |
| [OX1H0]=[CX3H0]([#8])[CX4H2]      | 0.3268 | [#6X3][#6X3]                      | 0.6026 |
| [CX4H2](O)[CHX4]                  | 0.3212 | [#8]=[#6][#6]=[#8]                | 0.7001 |
| [CX3H0](=[OX1H0])([OX2H1])[CX4H2] | 0.2723 | [CHX4]([CH3X4])[CH2X4]            | 0.7511 |
| [#8]=[#6][#6][#6]=[#8]            | 0.2611 | [#8]=[#6][#6H2][#6H1]             | 0.7651 |
| [CX4H]O                           | 0.2494 | [CX3](=O)[OX2H1]                  | 0.7694 |
| [CX4H2]([#6])[O]                  | 0.2027 | [CX4H3][CX4H1]                    | 0.7729 |

---

Example 50 true smiles: COc1ccccc1O formula: C7H8O2  
Index of correct structure: 1 of 5977  
True structure loss: 0.008976  
True structure:

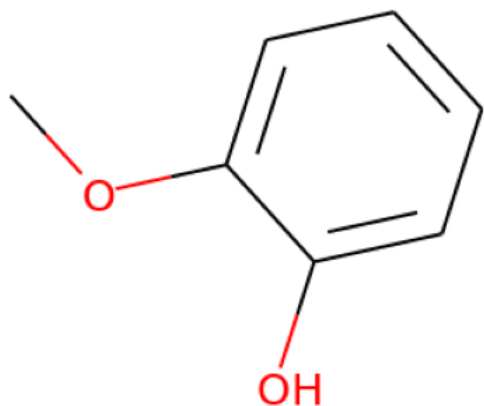

Experimental <sup>13</sup>C NMR (solvent: CDCl<sub>3</sub>)

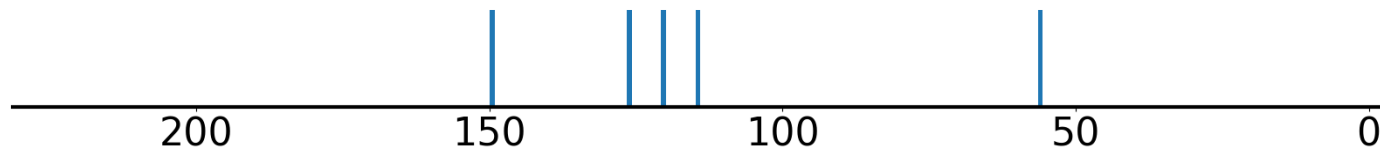

Experimental <sup>1</sup>H NMR (solvent: CDCl<sub>3</sub>)

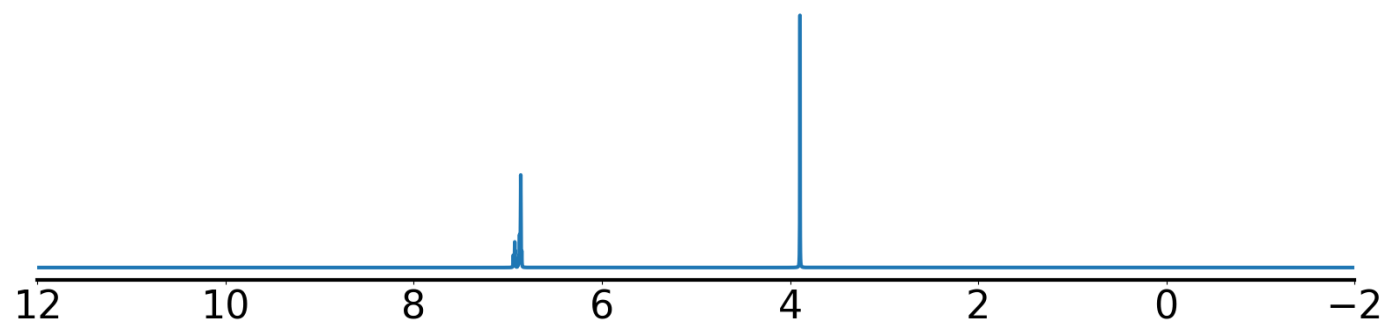

Top predicted structures (loss):

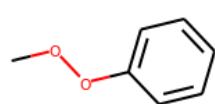

0.006759

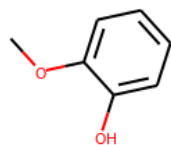

0.008976

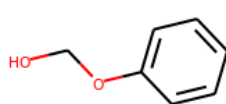

0.011707

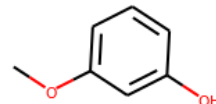

0.011993

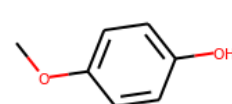

0.013973

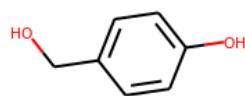

0.032486

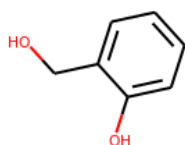

0.032625

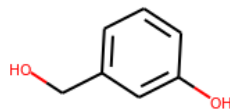

0.035157

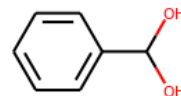

0.040894

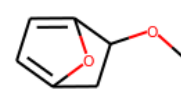

0.049135

|                                  |        |                                           |        |
|----------------------------------|--------|-------------------------------------------|--------|
| Top predicted substructures      | prob   |                                           |        |
| [#6X3][#6X3][#6X3][#6X3]         | 0.9979 | [#6X3H1][#6X3H0]                          | 0.9792 |
| [#6H1]                           | 0.9976 | [cH][cH]                                  | 0.9617 |
| [#6X3][#6X3]                     | 0.9973 | [cX3H1]([cX3H1])[cX3H0]                   | 0.9536 |
| [cH]                             | 0.9864 | [#6H1][#6H1]                              | 0.9455 |
| [#8][#6][#6][#6X3]               | 0.9828 | [#8][#6H0][#6H1]                          | 0.8961 |
| best positives                   | prob   | best negatives                            | prob   |
| [#6X3][#6X3][#6X3][#6X3]         | 0.9979 | [CX4H0]([NX3H1])([CX4H3])([CX4H2])[CX4H1] | 0.0    |
| [#6H1]                           | 0.9976 | [#6H3][#6H1][#7][#7]                      | 0.0    |
| [#6X3][#6X3]                     | 0.9973 | [CX4H1]([NX3H2])([CX4H2])[CX3H1]          | 0.0    |
| [cH]                             | 0.9864 | [CX4H1]([NX3H2])([CX4H3])[CX4H1]          | 0.0    |
| [#8][#6][#6][#6X3]               | 0.9828 | [CX4H2]([NX3H0])[CX4H3]                   | 0.0    |
| [#6X3H1][#6X3H0]                 | 0.9792 | [CX4H1]([NX3H2])([CX4H2])[CX4H0]          | 0.0    |
| [cH][cH]                         | 0.9617 | [CX4H1]([NX3H0])([CX4H2])[CX4H0]          | 0.0    |
| [cX3H1]([cX3H1])[cX3H0]          | 0.9536 | [#6H3][#6H1][#6H1]=[#7]                   | 0.0    |
| [#6H1][#6H1]                     | 0.9455 | [CX4H1]([NX3H0])([CX4H3])[CX4H2]          | 0.0    |
| [#8][#6H0][#6H1]                 | 0.8961 | [CX4H1]([NX3H1])([CX4H2])[CX4H0]          | 0.0    |
| worst negatives                  | prob   | worst positives                           | prob   |
| [#6X3H1][#6X3H1][#6X3H0][#6X3H1] | 0.4438 | [OX2H1]                                   | 0.3102 |
| [#8][#6H1][#6H1]                 | 0.223  | [cX3H0]([cX3H1])([cX3H0])[OX2H1]          | 0.3169 |
| [#8][#6H][#6X3][#6X3H]           | 0.1817 | [OX2H][cX3]:[c]                           | 0.3804 |
| [cX3H1]([cX3H0])[cX3H0]          | 0.1601 | [#8][#6][#6][#8]                          | 0.4274 |
| [#8][#6][#6H2]                   | 0.1257 | [#6]1[#6][#6][#6][#6]1                    | 0.5898 |
| [cX3H0][cX3H1][cX3H0][OX2H1]     | 0.1126 | [cX3H1]([cX3H1])[cX3H1]                   | 0.7576 |
| o[cH]                            | 0.1048 | [CX4H3]                                   | 0.8693 |
| [#8][#6][#6][#6][#6][#8]         | 0.0975 | [CX4H3][OX2H0]                            | 0.885  |
| [cX3H1]([cX2H0])[cX3H1]          | 0.097  | [cH]cO                                    | 0.8922 |
| [cX3H0][cX3H1][cX3H1][cX3H0]     | 0.0953 | [#8][#6H0][#6H1]                          | 0.8961 |

---

Example 51 true smiles: Nc1cccc(N)n1 formula: C5H7N3  
Index of correct structure: 0 of 5951  
True structure loss: 0.015978  
True structure:

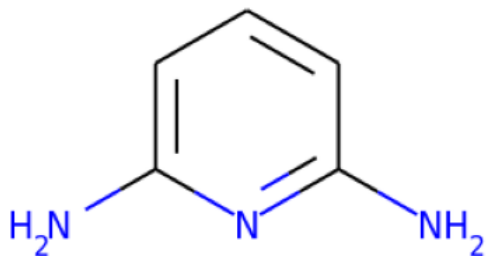

Experimental  $^{13}\text{C}$  NMR (solvent: Benzene- $d_6$ )

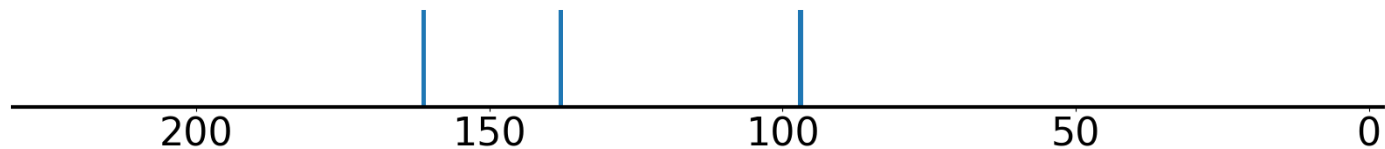

Experimental  $^1\text{H}$  NMR (solvent:  $\text{CDCl}_3$ )

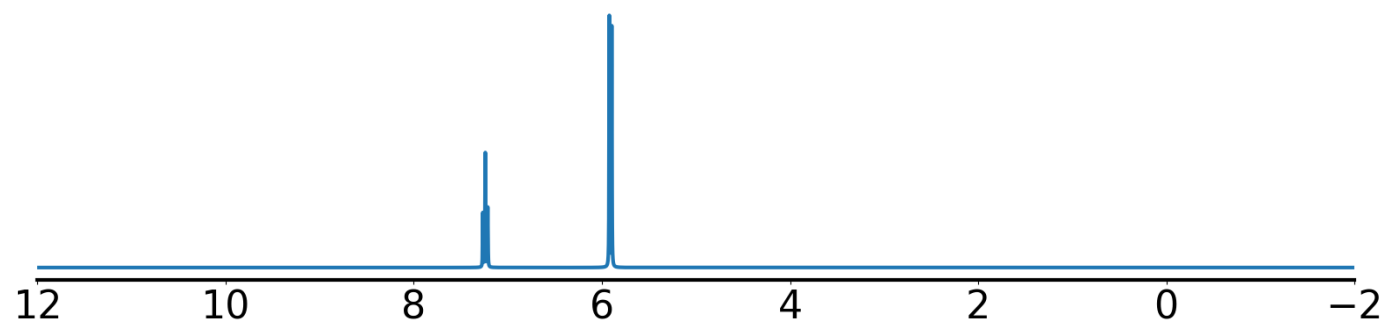

Top predicted structures (loss):

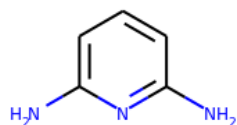

0.015978

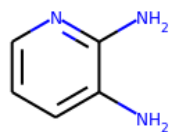

0.021855

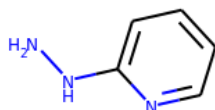

0.023035

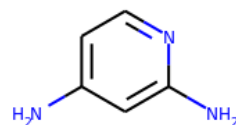

0.023718

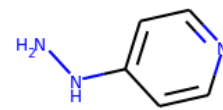

0.025275

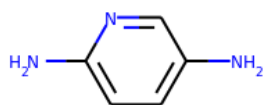

0.028579

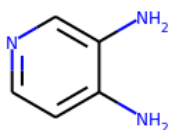

0.029698

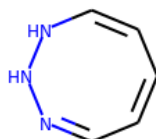

0.031166

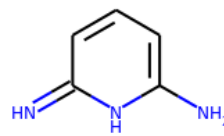

0.031357

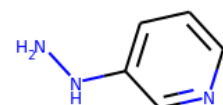

0.031773



| Top predicted substructures      | prob        |                                        | prob        |
|----------------------------------|-------------|----------------------------------------|-------------|
| [#6H1]                           | 0.9965      | [#7][#6][#6X3]                         | 0.9124      |
| [#6X3][#6X3]                     | 0.9714      | [cX3H1]([cX3H1])[cX3H0]                | 0.8833      |
| [cH][cH]                         | 0.9446      | [cH]                                   | 0.8383      |
| [#7X3H2]                         | 0.9273      | [#7][#6][#6][#6X3]                     | 0.8363      |
| [#6X3H1][#6X3H0]                 | 0.9227      | [#7][#6H0][#6H1]                       | 0.8301      |
| <b>best positives</b>            | <b>prob</b> | <b>best negatives</b>                  | <b>prob</b> |
| [#6H1]                           | 0.9965      | [OX2H1][CX4H2][CX4H1]([CX4H2])[CX4H2]  | 0.0         |
| [#6X3][#6X3]                     | 0.9714      | [OX2H0][CX4H2][CX4H1]([CX4H1])[CX4H1]  | 0.0         |
| [cH][cH]                         | 0.9446      | [OX2H0][CX4H2][CX4H1]([CX4H1])[CX4H3]  | 0.0         |
| [#7X3H2]                         | 0.9273      | [OX2H0]1[CX4H2][CX4H2][CX4H1][CX4H1]1  | 0.0         |
| [#6X3H1][#6X3H0]                 | 0.9227      | [#8][#6H1][#6H2][#6H1]=[#8]            | 0.0         |
| [#7][#6][#6X3]                   | 0.9124      | [#8][#6H2][#6H2][#6X2]                 | 0.0         |
| [cX3H1]([cX3H1])[cX3H0]          | 0.8833      | [CX4H1]([OX2H1])([CX4H2])[CX2H0]       | 0.0         |
| [cH]                             | 0.8383      | [OX2H1][CX4H2][CX4H1]([OX2H0])[CX4H1]  | 0.0         |
| [#7][#6][#6][#6X3]               | 0.8363      | [OX1H0]=[CX3H0]1[CX4H1][CX4H1][CX4H2]1 | 0.0         |
| [#7][#6H0][#6H1]                 | 0.8301      | [OX2H1][CX4H1][CX4H1]([CX4H1])[CX4H1]  | 0.0         |
| <b>worst negatives</b>           | <b>prob</b> | <b>worst positives</b>                 | <b>prob</b> |
| [#7X3H1]                         | 0.5125      | [#6]1[#6][#6][#6][#7]1                 | 0.1723      |
| [#7][#7]                         | 0.4241      | [#7][#6H0][#7]                         | 0.5165      |
| [#7][#6][#6][#6][#7]             | 0.3785      | [#7H2][#6H0]                           | 0.5818      |
| [#7H][#6X3H1]                    | 0.3693      | [#6X3][#7][#6X3]                       | 0.6083      |
| [#6X3][#7X3][#6X3]               | 0.3563      | [#7][#6X3H0][#6X3H1]                   | 0.6478      |
| [cX3H1]([nX3H1])[cX3H1]          | 0.3339      | [#7][#6][#7]                           | 0.6642      |
| [#6H1][#7][#6H1]                 | 0.2824      | [#6X3][#6X3][#6X3][#6X3]               | 0.7195      |
| [NH1]=[#6][#7]                   | 0.2799      | [cX3H1]([cX3H1])[cX3H1]                | 0.7327      |
| [#6]=[#7H]                       | 0.2438      | [#6H1][#6H1]                           | 0.8143      |
| [#6X3H1][#6X3H1][#6X3H0][#6X3H1] | 0.2195      | [#7][#6H0][#6H1]                       | 0.8301      |

---

Example 52 true smiles: C1CN2CCN1CC2 formula: C6H12N2  
Index of correct structure: 0 of 5002  
True structure loss: 0.010484  
True structure:

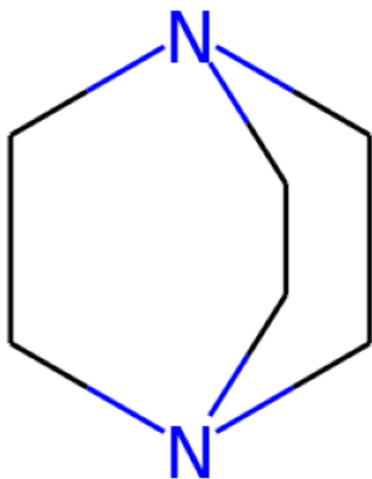

Experimental <sup>13</sup>C NMR (solvent: CDCl<sub>3</sub>)

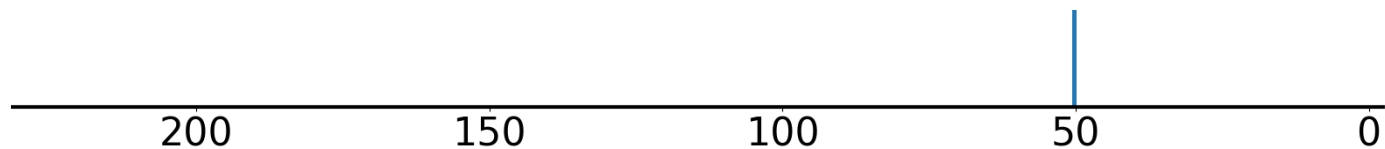

Experimental <sup>1</sup>H NMR (solvent: CDCl<sub>3</sub>)

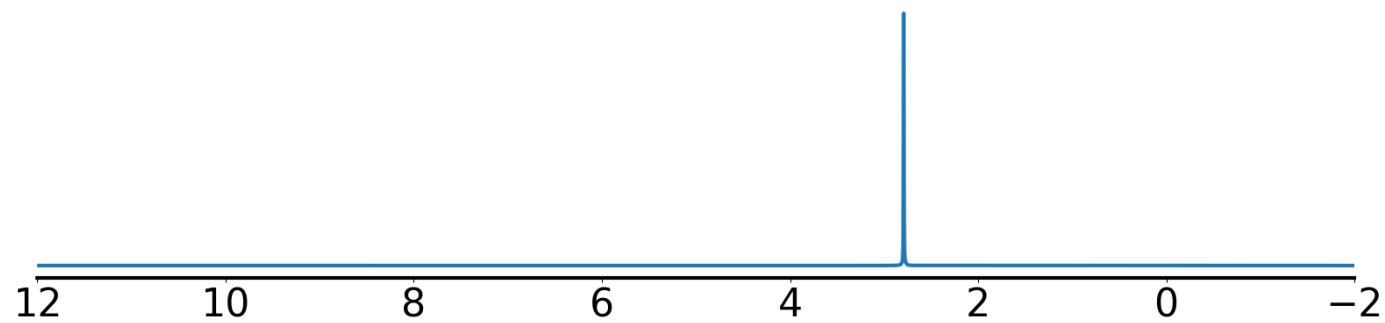

Top predicted structures (loss):

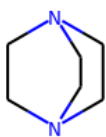

0.010484

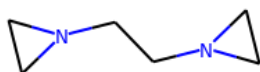

0.030006

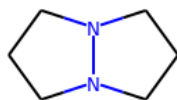

0.035419

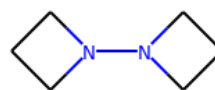

0.036905

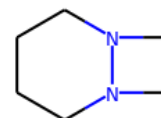

0.037147

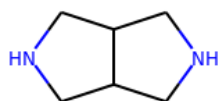

0.038104

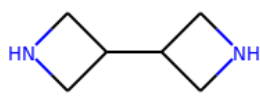

0.038266

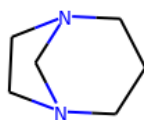

0.038602

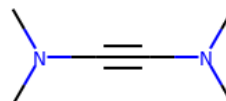

0.040673

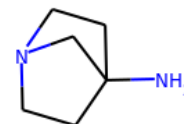

0.041273

| Top predicted substructures | prob        |                                        | prob        |
|-----------------------------|-------------|----------------------------------------|-------------|
| [#7X3][#6H2]                | 0.9364      | [#7][#6H2][#6H2]                       | 0.6456      |
| [#7][#6H2][#6H2][#7]        | 0.9076      | [#7][#6][#6][#7]                       | 0.6298      |
| [#6]1[#6][#7][#6][#6][#7]1  | 0.8213      | [#7X3H0]                               | 0.6207      |
| [#6H2][#7][#6H2]            | 0.7831      | [#7X3H1]                               | 0.55        |
| [#7][#6H2]                  | 0.6834      | [CX4H2][CX4H2]                         | 0.4638      |
| <b>best positives</b>       | <b>prob</b> | <b>best negatives</b>                  | <b>prob</b> |
| [#7X3][#6H2]                | 0.9364      | [OX2H0][CX3H1]=[#6X3H0][#8X2H0]        | 0.0         |
| [#7][#6H2][#6H2][#7]        | 0.9076      | [CX3H0](=[CX3H2])([OX2H0])[CX4H3]      | 0.0         |
| [#6]1[#6][#7][#6][#6][#7]1  | 0.8213      | [OX2H0][CX4H2][OX2H0][CX3H0]           | 0.0         |
| [#6H2][#7][#6H2]            | 0.7831      | [#6X3H1][#8][#6H2][#8]                 | 0.0         |
| [#7][#6H2]                  | 0.6834      | [OX2H0]1[CX4H2][CX4H1][CX3H0]=[CX3H1]1 | 0.0         |
| [#7][#6H2][#6H2]            | 0.6456      | [CX3H0](=[CX3H2])([OX2H0])[CX3H0]      | 0.0         |
| [#7][#6][#6][#7]            | 0.6298      | [#8]1[#6][#6]=[#6][#6]=[#6]1           | 0.0         |
| [#7X3H0]                    | 0.6207      | [#8][#6X3]=[#6X3][#6X3][#6H3]          | 0.0         |
| [CX4H2][CX4H2]              | 0.4638      | [CX3H0](=[CX3H2])([OX2H0])[CX4H0]      | 0.0         |
| [CX4H2]([NX3H0])[CX4H2]     | 0.3561      | [#6H3][#6H1][#6H1]=[#7]                | 0.0         |
| <b>worst negatives</b>      | <b>prob</b> | <b>worst positives</b>                 | <b>prob</b> |
| [#7X3H1]                    | 0.55        | [CX4H2]([NX3H0])[CX4H2]                | 0.3561      |
| [#6H3][#7]                  | 0.3664      | [CX4H2][CX4H2]                         | 0.4638      |
| [#7][#6][#6][#6][#7]        | 0.318       | [#7X3H0]                               | 0.6207      |
| [#7X3H2]                    | 0.2662      | [#7][#6][#6][#7]                       | 0.6298      |
| [#6H1]([#6H2])[#6H2]        | 0.2369      | [#7][#6H2][#6H2]                       | 0.6456      |
| [#6H1][#6H1]                | 0.2203      | [#7][#6H2]                             | 0.6834      |
| [#6]1[#6][#6][#6][#7]1      | 0.2197      | [#6H2][#7][#6H2]                       | 0.7831      |
| [CX4H2]([NX3H1])[CX4H2]     | 0.2188      | [#6]1[#6][#7][#6][#6][#7]1             | 0.8213      |
| [#6H1][#6H2]                | 0.2164      | [#7][#6H2][#6H2][#7]                   | 0.9076      |
| [#6H1]                      | 0.1993      | [#7X3][#6H2]                           | 0.9364      |

---

Example 53 true smiles: O=c1cc[nH]c(=O)[nH]1 formula: C4H4N2O2  
 Index of correct structure: 5 of 4792  
 True structure loss: 0.030097  
 True structure:

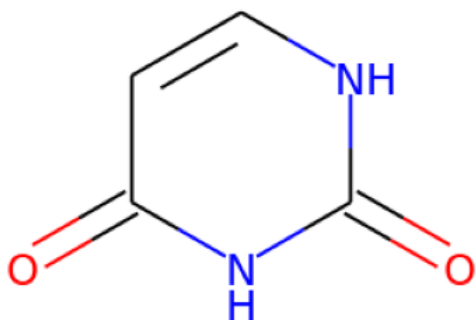

Experimental <sup>13</sup>C NMR (solvent: DMSO)

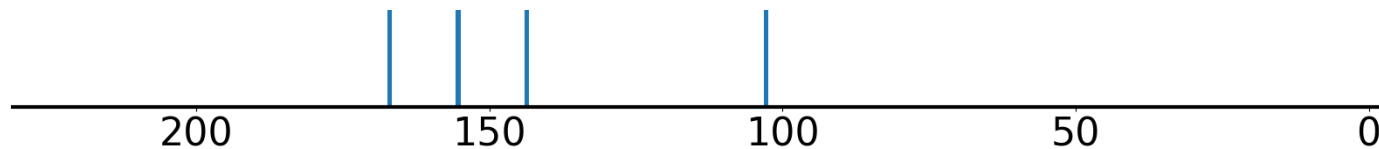

Experimental <sup>1</sup>H NMR (solvent: D2O)

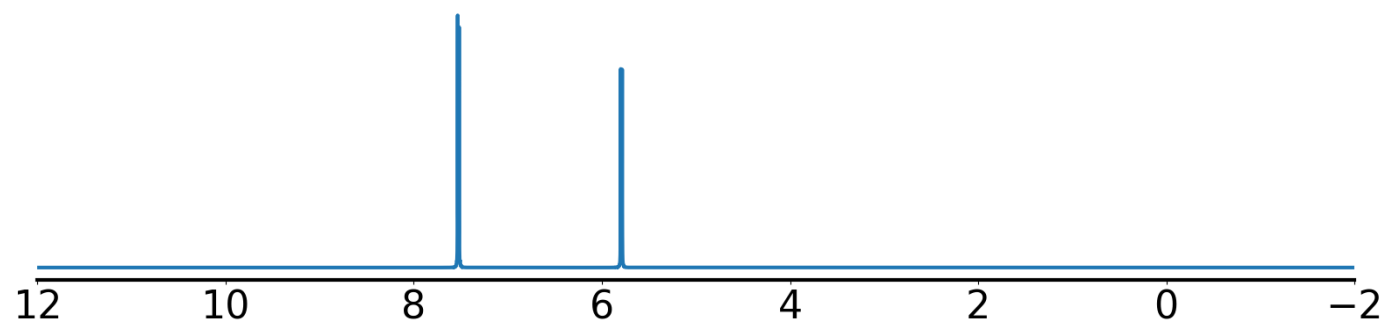

Top predicted structures (loss):

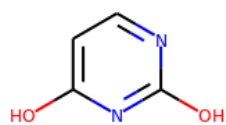

0.027947

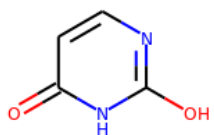

0.02828

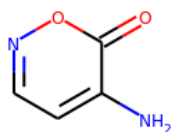

0.028299

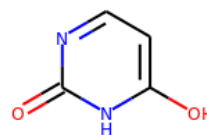

0.028616

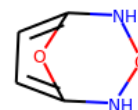

0.028707

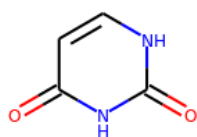

0.030097

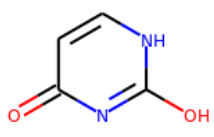

0.030224

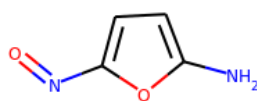

0.030357

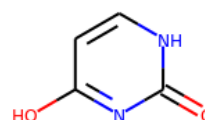

0.03056

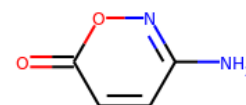

0.030795

|                             |        |                                              |        |
|-----------------------------|--------|----------------------------------------------|--------|
| Top predicted substructures | prob   |                                              |        |
| [#6H1]                      | 0.9941 | [cX3H1]([cX3H1])[cX3H0]                      | 0.7864 |
| [#6X3][#6X3]                | 0.9803 | [#7][#6][#6][#6X3]                           | 0.738  |
| [#6X3H1][#6X3H0]            | 0.9093 | [cH][cH]                                     | 0.7282 |
| [cH]                        | 0.8626 | [#7][#6H0][#6H1]                             | 0.6851 |
| [#7][#6][#6X3]              | 0.8431 | [#7][#6X3H0][#6X3H1]                         | 0.6356 |
| best positives              | prob   | best negatives                               | prob   |
| [#6H1]                      | 0.9941 | [OX2H0]1[CX4H2][CX4H2][CX4H1][CX4H1]1        | 0.0    |
| [#6X3][#6X3]                | 0.9803 | [OX2H0][CX4H2][CX4H1]([CX4H1])[CX4H1]        | 0.0    |
| [#6X3H1][#6X3H0]            | 0.9093 | [CX4H0]([NX3H1])([CX4H3])([CX4H2])[CX4H1]    | 0.0    |
| [cH]                        | 0.8626 | [CX4H1]([CX4H3])([CX4H2])[CX4H0]             | 0.0    |
| [#7][#6][#6X3]              | 0.8431 | [CX4H0]([CX4H3])([CX4H2])([CX4H2])[CX3H0]    | 0.0    |
| [cX3H1]([cX3H1])[cX3H0]     | 0.7864 | [OX1H0]=[CX3H0]1[CX4H1][CX4H1][CX4H2]1       | 0.0    |
| [#7][#6][#6X3]              | 0.738  | [CX4H1]([OX2H1])([CX4H2])[CX2H0]             | 0.0    |
| [cH][cH]                    | 0.7282 | [OX2H0][CX4H1][CX4H1]([CX4H2][CX4H1])[CX4H1] | 0.0    |
| [#7][#6H0][#6H1]            | 0.6851 | [CX4H2]([CX4H0])[CX2H0]                      | 0.0    |
| [#7][#6X3H0][#6X3H1]        | 0.6356 | [OX2H0][CX4H2][CX4H1]([CX4H2])[CX4H1]        | 0.0    |
| worst negatives             | prob   | worst positives                              | prob   |
| [#8][#6H0][#6H1]            | 0.4699 | [cX3H1]([nX3H1])[cX3H1]                      | 0.0997 |
| [OX2H1]                     | 0.4697 | [#7H][#6X3H1]                                | 0.1612 |
| [#6X3][#6X3][#6X3][#6X3]    | 0.4444 | [#8]=[#6][#6H1][#6H1]                        | 0.2121 |
| [#8]=[#6][#8]               | 0.4013 | [#7][#6][#6][#6][#7]                         | 0.2122 |
| [#8][#6][#6][#6X3]          | 0.3816 | [#7][#6H0][#7]                               | 0.278  |
| [#7X3H2]                    | 0.3228 | [#7X3H1]                                     | 0.4124 |
| [OX2H][cX3]:[c]             | 0.3076 | O=[#6][#6][#6X3]                             | 0.4135 |
| [cH]cO                      | 0.2842 | [OX1H0]=[cX3H0][cX3H1]                       | 0.4206 |
| [#7][#7]                    | 0.2816 | O=[cX3]                                      | 0.4341 |
| [cX3]([OX1])O               | 0.2715 | [#7][#6][#7]                                 | 0.463  |

---

Example 54 true smiles: NCc1cccn1 formula: C6H8N2  
Index of correct structure: 0 of 4358  
True structure loss: 0.012161  
True structure:

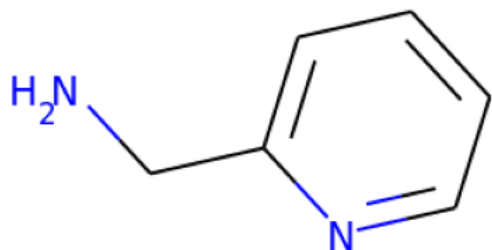

Experimental <sup>13</sup>C NMR (solvent: CDCl<sub>3</sub>)

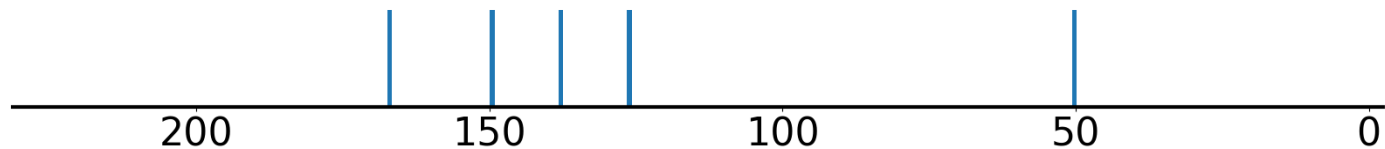

Experimental <sup>1</sup>H NMR (solvent: CDCl<sub>3</sub>)

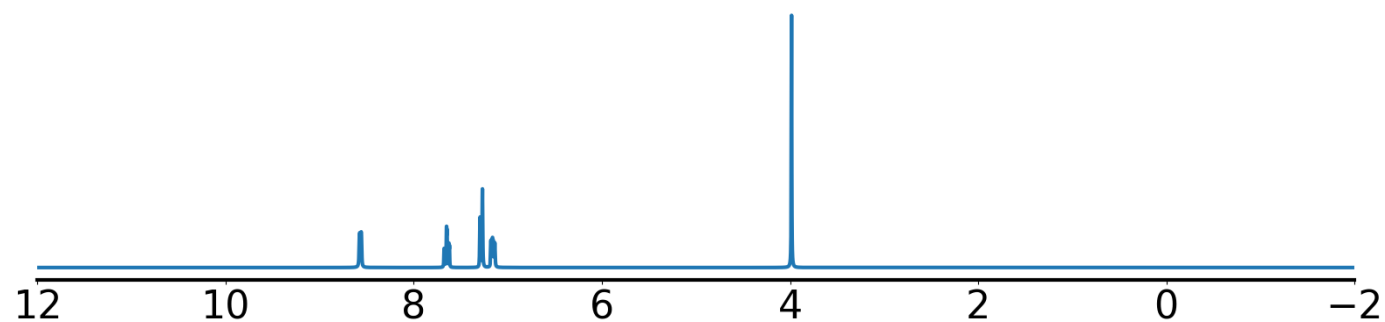

Top predicted structures (loss):

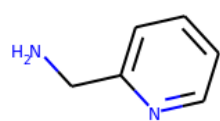

0.012161

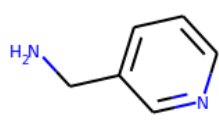

0.020249

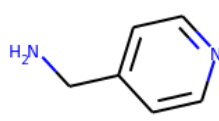

0.021371

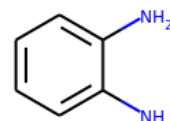

0.025413

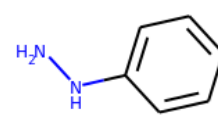

0.030034

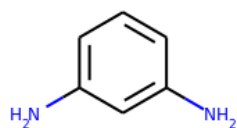

0.031805

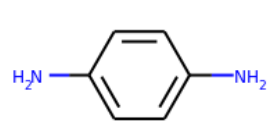

0.035658

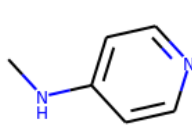

0.035862

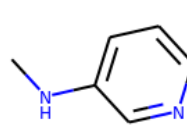

0.037262

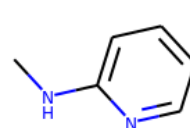

0.037527

|                                  |        |                                           |        |
|----------------------------------|--------|-------------------------------------------|--------|
| Top predicted substructures      | prob   |                                           |        |
| [#6H1]                           | 0.9999 | [cH]                                      | 0.9518 |
| [#7][#6][#6X3]                   | 0.9927 | [#6H1][#6H1]                              | 0.9483 |
| [cH][cH]                         | 0.9887 | [cX3H1]([nX2H0])[cX3H1]                   | 0.9449 |
| [#6X3][#6X3]                     | 0.9842 | [#6X3][#6X3][#6X3][#6X3]                  | 0.935  |
| [cX3H1]([cX3H1])[cX3H1]          | 0.9703 | [cX3H1]([cX3H1])[cX3H0]                   | 0.9303 |
| best positives                   | prob   | best negatives                            | prob   |
| [#6H1]                           | 0.9999 | [OX2H0]1[CX4H2][CX4H2][CX4H1][CX4H1]1     | 0.0    |
| [#7][#6][#6X3]                   | 0.9927 | [CX4H0]([OX2H1])([CX4H3])([CX4H2])[CX4H1] | 0.0    |
| [cH][cH]                         | 0.9887 | [#8][#6H1][#6H2][#6H1]=[#8]               | 0.0    |
| [#6X3][#6X3]                     | 0.9842 | [OX2H0][CX4H2][CX4H2][CX4H1][OX2H0]       | 0.0    |
| [cX3H1]([cX3H1])[cX3H1]          | 0.9703 | [OX2H0]1[CX4H2][CX4H1][CX4H1]1            | 0.0    |
| [cH]                             | 0.9518 | [OX2H0][CX4H2][CX4H1]([CX4H1])[CX4H3]     | 0.0    |
| [#6H1][#6H1]                     | 0.9483 | [CX4H1]([OX2H1])([CX4H2])[CX2H0]          | 0.0    |
| [cX3H1]([nX2H0])[cX3H1]          | 0.9449 | [OX2H1][CX4H1][CX4H1]([CX4H1])[CX4H1]     | 0.0    |
| [#6X3][#6X3][#6X3][#6X3]         | 0.935  | [OX2H0][CX4H2][CX4H1]([CX4H1])[CX4H1]     | 0.0    |
| [cX3H1]([cX3H1])[cX3H0]          | 0.9303 | [OX2H1][CX4H1]1[CX4H1][CX4H2][CX4H1]1     | 0.0    |
| worst negatives                  | prob   | worst positives                           | prob   |
| [#6X3H1][#6X3H1][#6X3H0][#6X3H1] | 0.4853 | [#7][#6][#6][#7]                          | 0.2992 |
| [CX4H3]                          | 0.4706 | [#7X3H2]                                  | 0.5031 |
| [#7X3H1]                         | 0.2605 | [#6X3][#7][#6X3]                          | 0.5142 |
| [CHX3]=[CHX3]                    | 0.2578 | [#7H2][#6H2]                              | 0.528  |
| [#7][#6][#7]                     | 0.244  | [#7X3][#6H2]                              | 0.6095 |
| [#6H1][#7][#6H1]                 | 0.2378 | [#7][#6H2]                                | 0.6933 |
| [#6H3][#7]                       | 0.1691 | [#7][#6H0][#6H1]                          | 0.7268 |
| [CX4H2][CX3H]                    | 0.1506 | [#7][#6X3H0][#6X3H1]                      | 0.7429 |
| [#7][#6H0][#7]                   | 0.1391 | [#6X3][#6H2][#7]                          | 0.8122 |
| [#7H2][#6H0]                     | 0.1267 | [#6X3H1][#6X3H0]                          | 0.8232 |

---

Example 55 true smiles: Cc1cccc(N)n1 formula: C6H8N2  
Index of correct structure: 0 of 4358  
True structure loss: 0.017386  
True structure:

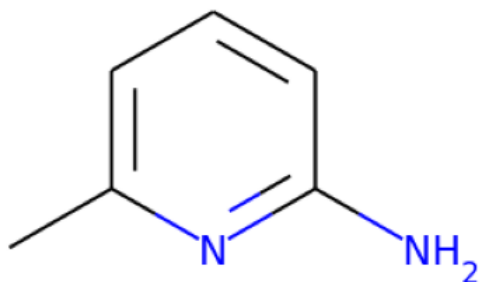

Experimental  $^{13}\text{C}$  NMR (solvent:  $\text{CDCl}_3$ )

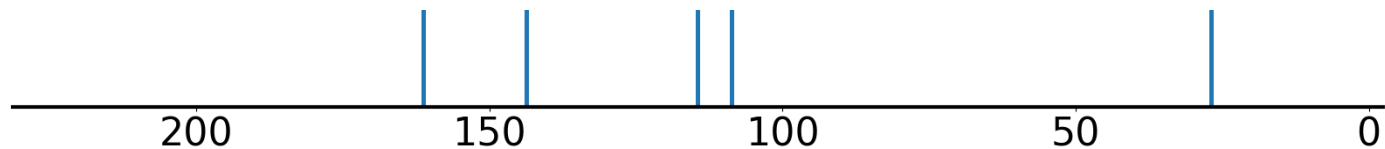

Experimental  $^1\text{H}$  NMR (solvent:  $\text{CDCl}_3$ )

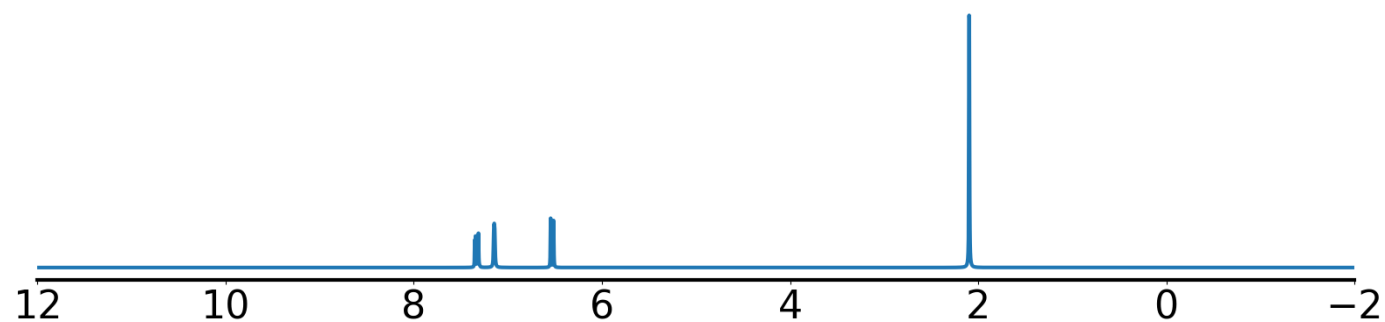

Top predicted structures (loss):

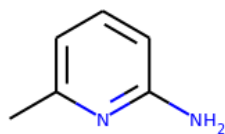

0.017386

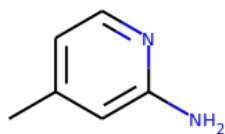

0.023935

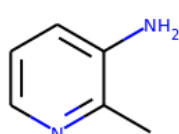

0.02415

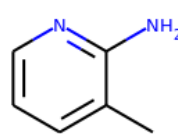

0.024627

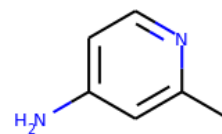

0.025266

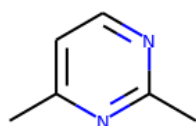

0.025368

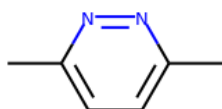

0.027708

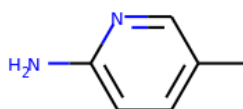

0.03032

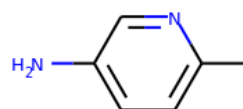

0.032023

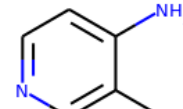

0.035372



|                                  |        |                                        |        |
|----------------------------------|--------|----------------------------------------|--------|
| Top predicted substructures      | prob   |                                        |        |
| [#6H1]                           | 0.9981 | [cX3H1]([cX3H1])[cX3H0]                | 0.977  |
| [cH][cH]                         | 0.9943 | [#7][#6][#6X3]                         | 0.9361 |
| [CX4H3]                          | 0.9924 | [#6X3][#6X3][#6X3][#6X3]               | 0.9352 |
| [#6X3][#6X3]                     | 0.9852 | [#6H3][#6H0]                           | 0.928  |
| [cH]                             | 0.9783 | [#6X3H1][#6X3H0]                       | 0.9121 |
| best positives                   | prob   | best negatives                         | prob   |
| [#6H1]                           | 0.9981 | [OX1H0]=[CX3H0]1[CX4H1][CX4H1][CX4H2]1 | 0.0    |
| [cH][cH]                         | 0.9943 | [OX2H0]1[CX4H2][CX4H2][CX4H1][CX4H1]1  | 0.0    |
| [CX4H3]                          | 0.9924 | [#8][#6H1][#6H2][#6H1]=[#8]            | 0.0    |
| [#6X3][#6X3]                     | 0.9852 | [OX2H1][CX4H1]1[CX4H1][CX4H2][CX4H1]1  | 0.0    |
| [cH]                             | 0.9783 | [OX2H1][CX4H1][CX4H1]([CX4H1])[CX4H1]  | 0.0    |
| [cX3H1]([cX3H1])[cX3H0]          | 0.977  | [OX2H1][CX4H0][CX4H2][CX4H0]           | 0.0    |
| [#7][#6][#6X3]                   | 0.9361 | [OX2H0][CX4H2][CX4H1]([CX4H1])[CX4H3]  | 0.0    |
| [#6X3][#6X3][#6X3][#6X3]         | 0.9352 | [OX2H0][CX4H2][CX4H2][CX4H1][OX2H0]    | 0.0    |
| [#6H3][#6H0]                     | 0.928  | [OX2H0]1[CX4H2][CX4H1]1[CX4H1]         | 0.0    |
| [#6X3H1][#6X3H0]                 | 0.9121 | [OX2H0]1[CX4H2][CX4H1][CX4H1]1         | 0.0    |
| worst negatives                  | prob   | worst positives                        | prob   |
| [#6X3][#7X3][#6X3]               | 0.6413 | [#7H2][#6H0]                           | 0.3514 |
| [#7X3H1]                         | 0.554  | [#6]1[#6][#6][#6][#6][#7]1             | 0.422  |
| [#6X3H1][#6X3H1][#6X3H0][#6X3H1] | 0.5275 | [#7][#6H0][#7]                         | 0.4561 |
| [#7H][#6X3H1]                    | 0.277  | [#6H3][#6H0][#7H0][#6H0]               | 0.4617 |
| [CX4H3][CX3]                     | 0.2544 | [#7][#6][#7]                           | 0.5142 |
| [#6]1[#6][#6][#6][#7]1           | 0.2539 | [#7X3H2]                               | 0.5202 |
| [#7][#7]                         | 0.2366 | [#6X3][#6][#6][#6H3]                   | 0.5282 |
| [#7X3H0]                         | 0.1952 | [#6H3][#6][#6X3]                       | 0.5868 |
| [#6]=[#7H]                       | 0.1843 | [#7][#6][#6H3]                         | 0.6043 |
| [CX4H3][CX3H0]                   | 0.1842 | [#7][#6X3H0][#6X3H1]                   | 0.734  |

---

Example 56 true smiles: NNc1ccccc1 formula: C6H8N2  
Index of correct structure: 1 of 4358  
True structure loss: 0.019757  
True structure:

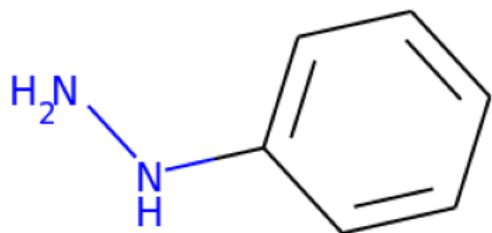

Experimental  $^{13}\text{C}$  NMR (solvent: CDCl3)

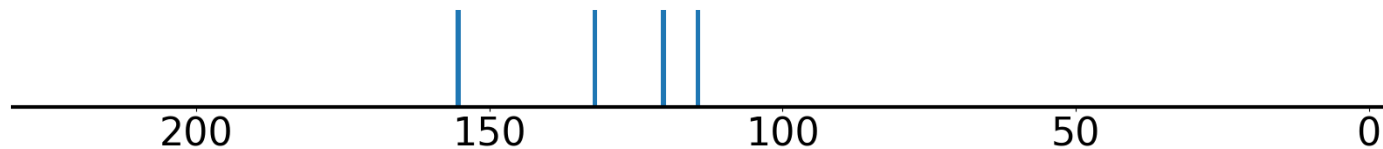

Experimental  $^1\text{H}$  NMR (solvent: CDCl3)

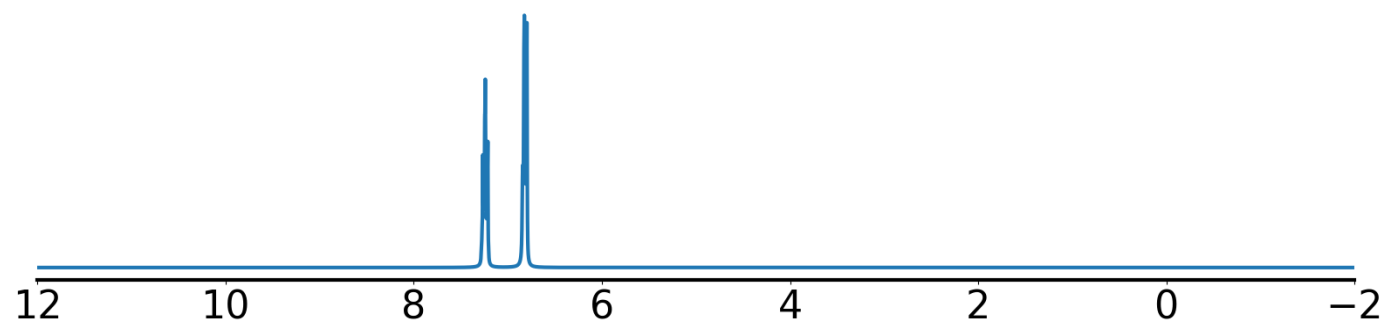

Top predicted structures (loss):

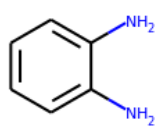

0.018309

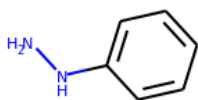

0.019757

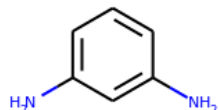

0.021042

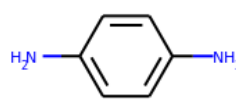

0.024399

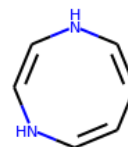

0.032753

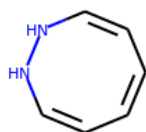

0.035244

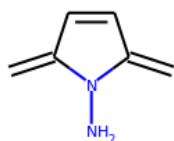

0.043157

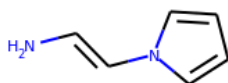

0.04647

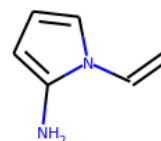

0.050038

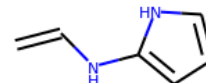

0.051222

|                             |        |                                       |        |
|-----------------------------|--------|---------------------------------------|--------|
| Top predicted substructures | prob   |                                       |        |
| [cH][cH]                    | 0.9995 | [cX3H1]([cX3H1])[cX3H0]               | 0.9884 |
| [#6H1]                      | 0.9994 | [cH]                                  | 0.9875 |
| [#6X3][#6X3]                | 0.9954 | [cX3H1]([cX3H1])[cX3H1]               | 0.9844 |
| [#6X3][#6X3][#6X3][#6X3]    | 0.9949 | [#7][#6][#6][#6X3]                    | 0.9666 |
| [#7][#6][#6X3]              | 0.9921 | [#6X3H1][#6X3H0]                      | 0.9489 |
| best positives              | prob   | best negatives                        | prob   |
| [cH][cH]                    | 0.9995 | [OX2H0]1[CX4H2][CX4H2][CX4H1][CX4H1]1 | 0.0    |
| [#6H1]                      | 0.9994 | [#8][#6H1][#6H2][#6H1]=[#8]           | 0.0    |
| [#6X3][#6X3]                | 0.9954 | [OX2H0][CX4H2][CX4H1]([CX4H1])[CX4H3] | 0.0    |
| [#6X3][#6X3][#6X3][#6X3]    | 0.9949 | [OX2H0][CX4H2][CX4H2][CX4H1][OX2H0]   | 0.0    |
| [#7][#6][#6X3]              | 0.9921 | [OX2H1][CX4H1]1[CX4H1][CX4H2][CX4H1]1 | 0.0    |
| [cX3H1]([cX3H1])[cX3H0]     | 0.9884 | [OX2H0]1[CX4H2][CX4H1][CX4H1]1        | 0.0    |
| [cH]                        | 0.9875 | [OX2H0]1[CX4H2][CX4H2][CX4H0]1        | 0.0    |
| [cX3H1]([cX3H1])[cX3H1]     | 0.9844 | [OX2H0][CX4H2][CX4H1]([CX4H1])[CX4H1] | 0.0    |
| [#7][#6][#6][#6X3]          | 0.9666 | [OX2H1][CX4H0][CX4H1]([CX4H2])[CX4H1] | 0.0    |
| [#6X3H1][#6X3H0]            | 0.9489 | [OX2H0][CX4H2][CX4H0][OX2H0]          | 0.0    |
| worst negatives             | prob   | worst positives                       | prob   |
| [#6X3][#7][#6X3]            | 0.8957 | [#7][#7H1]                            | 0.0997 |
| [#6X3][#7X3][#6X3]          | 0.8123 | [#7][#7]                              | 0.1497 |
| [#6]1[#6][#6][#6][#6][#7]1  | 0.6365 | [#7X3H1]                              | 0.549  |
| [#7H2][#6H0]                | 0.5821 | [#6X3H1][#6X3H1][#6X3H0][#6X3H1]      | 0.7398 |
| [#7][#6H0][#7]              | 0.5793 | [#7][#6X3H0][#6X3H1]                  | 0.7727 |
| [#7H][#6X3H1]               | 0.5137 | [#7][#6H0][#6H1]                      | 0.7849 |
| [#7][#6][#7]                | 0.4792 | [#6]1[#6][#6][#6][#6]1                | 0.8317 |
| [#6]1[#6][#6][#6][#7]1      | 0.4378 | [#7X3H2]                              | 0.8412 |
| [#7X3H0]                    | 0.3779 | [#6H1][#6H1]                          | 0.9061 |
| [cX3H1]([nX3H1])[cX3H1]     | 0.3363 | [#6X3H1][#6X3H0]                      | 0.9489 |

---

Example 57 true smiles: Cc1cccc(N)n1 formula: C6H8N2  
Index of correct structure: 0 of 4358  
True structure loss: 0.016728  
True structure:



Experimental <sup>13</sup>C NMR (solvent: CDCl<sub>3</sub>)



Experimental <sup>1</sup>H NMR (solvent: CDCl<sub>3</sub>)

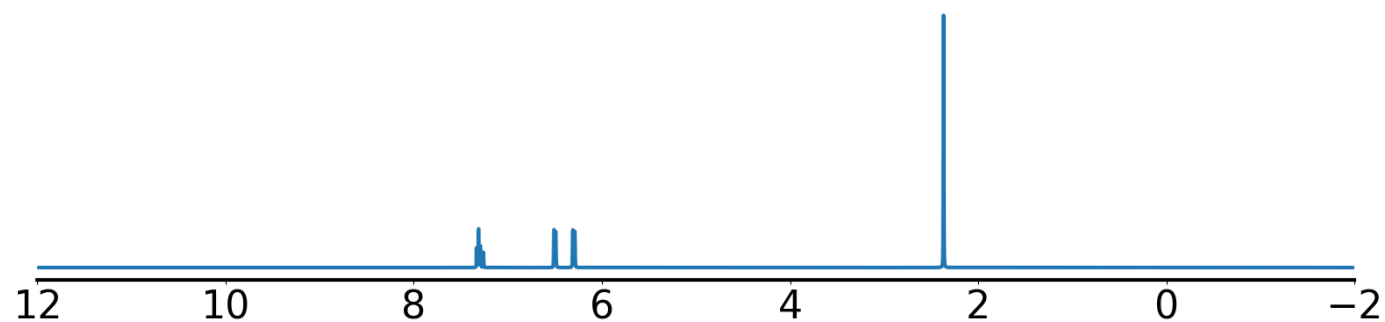

Top predicted structures (loss):

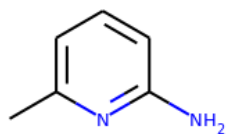

0.016728

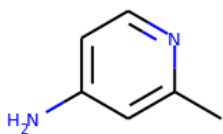

0.022537

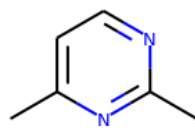

0.023097

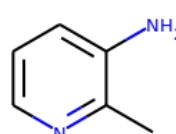

0.023302

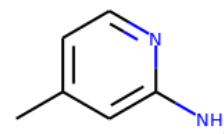

0.024167

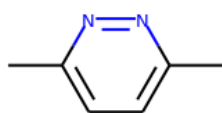

0.025751

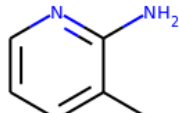

0.029256

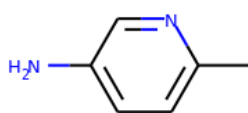

0.030268

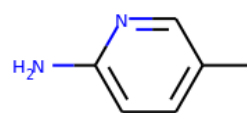

0.030902

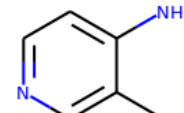

0.037129

| Top predicted substructures      | prob        |                                        |             |
|----------------------------------|-------------|----------------------------------------|-------------|
| [#6H1]                           | 0.9989      | [cH]                                   | 0.9807      |
| [cH][cH]                         | 0.9967      | [#7][#6][#6X3]                         | 0.9724      |
| [CX4H3]                          | 0.995       | [#6X3H1][#6X3H0]                       | 0.968       |
| [#6X3][#6X3]                     | 0.9881      | [#6X3][#6X3][#6X3][#6X3]               | 0.9596      |
| [cX3H1]([cX3H1])[cX3H0]          | 0.9852      | [#6H3][#6H0]                           | 0.9539      |
| <b>best positives</b>            | <b>prob</b> | <b>best negatives</b>                  | <b>prob</b> |
| [#6H1]                           | 0.9989      | [OX2H0]1[CX4H2][CX4H2][CX4H1][CX4H1]1  | 0.0         |
| [cH][cH]                         | 0.9967      | [#8][#6H1][#6H2][#6H1]=[#8]            | 0.0         |
| [CX4H3]                          | 0.995       | [OX2H0][CX4H2][CX4H1]([CX4H1])[CX4H3]  | 0.0         |
| [#6X3][#6X3]                     | 0.9881      | [OX1H0]=[CX3H0]1[CX4H1][CX4H1][CX4H2]1 | 0.0         |
| [cX3H1]([cX3H1])[cX3H0]          | 0.9852      | [OX2H1][CX4H1]1[CX4H1][CX4H2][CX4H1]1  | 0.0         |
| [cH]                             | 0.9807      | [OX2H1][CX4H1][CX4H1]([CX4H1])[CX4H1]  | 0.0         |
| [#7][#6][#6X3]                   | 0.9724      | [OX2H0][CX4H2][CX4H1]([CX4H1])[CX4H1]  | 0.0         |
| [#6X3H1][#6X3H0]                 | 0.968       | [OX2H0][CX4H2][CX4H2][CX4H1][OX2H0]    | 0.0         |
| [#6X3][#6X3][#6X3][#6X3]         | 0.9596      | [OX2H0]1[CX4H2][CX4H1][CX4H1]1         | 0.0         |
| [#6H3][#6H0]                     | 0.9539      | [OX2H1][CX4H2][CX4H1]([CX4H2])[CX4H2]  | 0.0         |
| <b>worst negatives</b>           | <b>prob</b> | <b>worst positives</b>                 | <b>prob</b> |
| [#6X3][#7X3][#6X3]               | 0.7699      | [#7H2][#6H0]                           | 0.2438      |
| [#7X3H1]                         | 0.629       | [#7X3H2]                               | 0.2453      |
| [#6X3H1][#6X3H1][#6X3H0][#6X3H1] | 0.5472      | [#7][#6][#7]                           | 0.379       |
| [#7H][#6X3H1]                    | 0.2591      | [#7][#6H0][#7]                         | 0.4221      |
| [cX3H1]([cX3H0])[cX3H0]          | 0.2153      | [#6]1[#6][#6][#6][#6][#7]1             | 0.6541      |
| [#6H3][#7]                       | 0.2029      | [#6H3][#6H0][#7H0][#6H0]               | 0.6721      |
| [#7X3H0]                         | 0.2019      | [#6H3][#6][#6X3]                       | 0.7687      |
| [#7][#6][#6][#6][#7]             | 0.1944      | [#6X3][#6][#6][#6H3]                   | 0.7763      |
| [cX3H1]([nX2H0])[cX3H1]          | 0.1778      | [cX3H1]([cX3H1])[cX3H1]                | 0.8309      |
| [cX3H1]([nX3H1])[cX3H1]          | 0.1711      | [#7][#6X3H0][#6X3H1]                   | 0.8473      |

---

Example 58 true smiles: NCCCCCCCN formula: C7H19N3  
Index of correct structure: 0 of 4058  
True structure loss: 0.010241  
True structure:

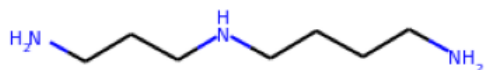

Experimental <sup>13</sup>C NMR (solvent: D2O)

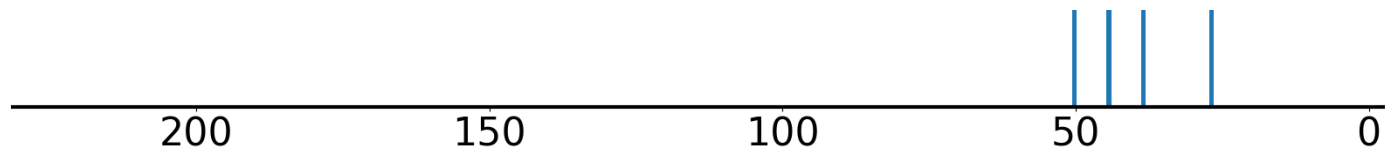

Experimental <sup>1</sup>H NMR (solvent: D2O)

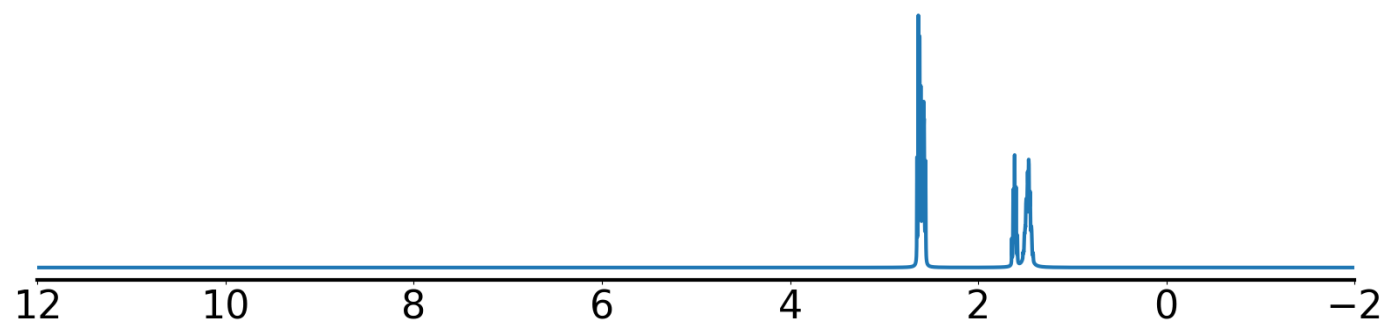

Top predicted structures (loss):

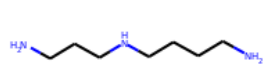

0.010241

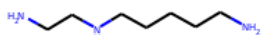

0.016137

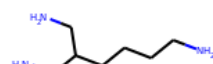

0.020638

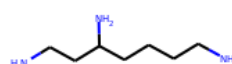

0.022335

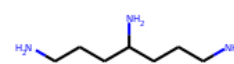

0.023653

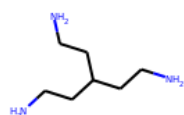

0.023821

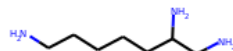

0.025178

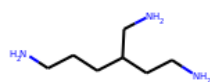

0.028091

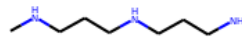

0.031008

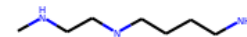

0.03336

|                              |        |                                   |        |
|------------------------------|--------|-----------------------------------|--------|
| Top predicted substructures  | prob   |                                   |        |
| [#7X3H2]                     | 1.0    | [#7][#6H2][#6H2]                  | 0.9648 |
| [CX4H2]([#6])[#6]            | 0.9995 | [CX4H2]([NX3H2])[CX4H2]           | 0.9246 |
| [#7X3][#6H2]                 | 0.9936 | [CX4H2][CX4H2][CX4H2][CX4H2]      | 0.9006 |
| [#7][#6H2]                   | 0.9891 | [CX4H2][CX4H2]                    | 0.8929 |
| [#7H2][#6H2]                 | 0.9855 | [CX4H2]([CX4H2])[CX4H2]           | 0.8557 |
| best positives               | prob   | best negatives                    | prob   |
| [#7X3H2]                     | 1.0    | [CX3H0](=[CX3H1])([OX2H0])[CX2H0] | 0.0    |
| [CX4H2]([#6])[#6]            | 0.9995 | [CX2H0](#[CX2H1])[CX3H0]          | 0.0    |
| [#7X3][#6H2]                 | 0.9936 | [CX2H1]#[CX2H0][CX3H1]=[CX3H0]    | 0.0    |
| [#7][#6H2]                   | 0.9891 | C=CC=CC#C                         | 0.0    |
| [#7H2][#6H2]                 | 0.9855 | [#6X2][#6H1][#6X2]                | 0.0    |
| [#7][#6H2][#6H2]             | 0.9648 | [CX2H0](#[CX2H0])[CX2H0]          | 0.0    |
| [CX4H2]([NX3H2])[CX4H2]      | 0.9246 | [CX2H0](#[CX2H1])[CX3H1]          | 0.0    |
| [CX4H2][CX4H2][CX4H2][CX4H2] | 0.9006 | CC#CCC=C                          | 0.0    |
| [CX4H2][CX4H2]               | 0.8929 | C=CCCC#C                          | 0.0    |
| [CX4H2]([CX4H2])[CX4H2]      | 0.8557 | [CX3H0](=[CX3H1])([CX4H2])[CX2H0] | 0.0    |
| worst negatives              | prob   | worst positives                   | prob   |
| [#7H2][#6H1]                 | 0.5241 | [#6H2][#7][#6H2]                  | 0.0919 |
| [#6H1][#6H2]                 | 0.4136 | [#7X3H1]                          | 0.2527 |
| [#6H1]                       | 0.3811 | [CX4H2]([NX3H1])[CX4H2]           | 0.5462 |
| [CX4H2]([NX3H2])[CX4H1]      | 0.2582 | [#7][#6][#6][#6][#6][#7]          | 0.6442 |
| [#7][#6][#6][#7]             | 0.2526 | [#7][#6][#6][#6][#7]              | 0.7666 |
| [#6H1][#6H2][#6][#6][#7]     | 0.1983 | [CX4H2]([CX4H2])[CX4H2]           | 0.8557 |
| CCCCC                        | 0.1571 | [CX4H2][CX4H2]                    | 0.8929 |
| [CX4H2]([CX4H2])[CX4H1]      | 0.1543 | [CX4H2][CX4H2][CX4H2][CX4H2]      | 0.9006 |
| [#6H1]([#6H2])[#6H2]         | 0.1199 | [CX4H2]([NX3H2])[CX4H2]           | 0.9246 |
| [CX4H3][#6]                  | 0.1152 | [#7][#6H2][#6H2]                  | 0.9648 |

---

Example 59 true smiles: NCCCC(=O)O formula: C5H11NO2  
Index of correct structure: 0 of 3703  
True structure loss: 0.006702  
True structure:

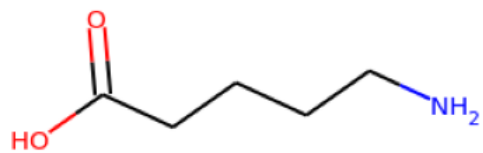

Experimental <sup>13</sup>C NMR (solvent: D2O)

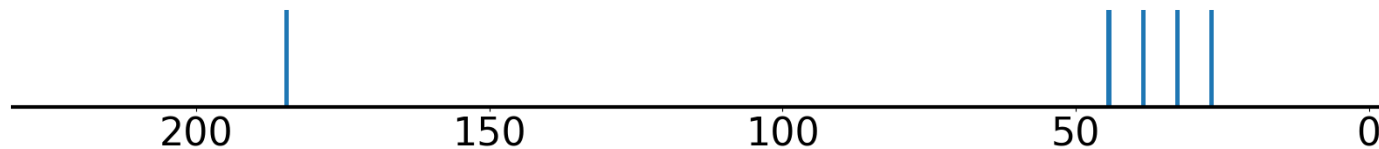

Experimental <sup>1</sup>H NMR (solvent: D2O)

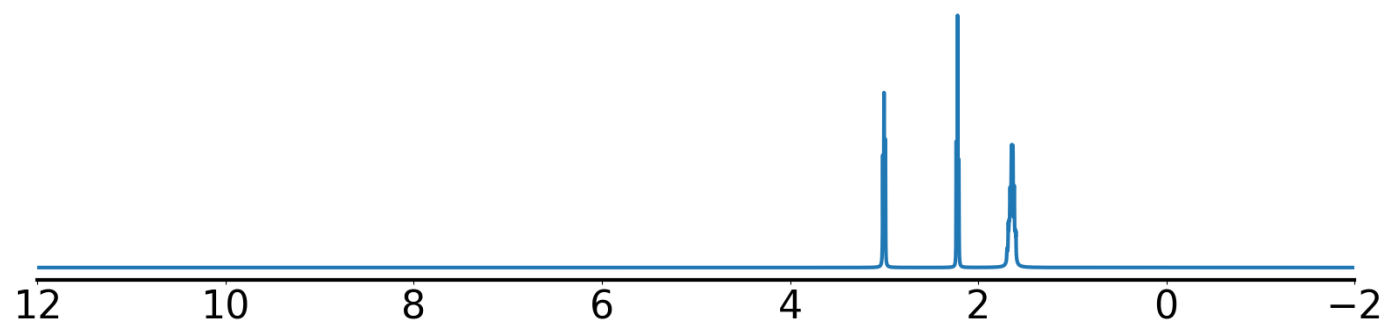

Top predicted structures (loss):

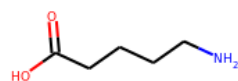

0.006702

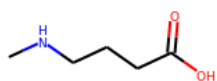

0.042572

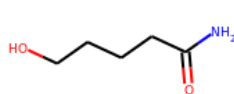

0.05026

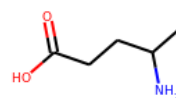

0.060383

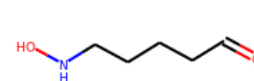

0.062468

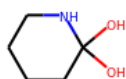

0.064524

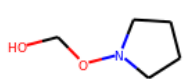

0.065611

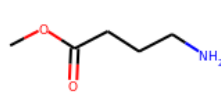

0.066211

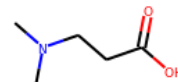

0.068058

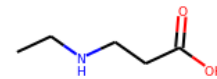

0.069829



|                                   |        |                                   |        |
|-----------------------------------|--------|-----------------------------------|--------|
| Top predicted substructures       | prob   |                                   |        |
| [CX4H2]([#6])[#6]                 | 0.9999 | [CX4H2]([CX4H2])[CX4H2]           | 0.9688 |
| [OX2H1]                           | 0.9971 | [#7][#6H2][#6H2]                  | 0.9436 |
| [CX3](=[OX1])C                    | 0.9947 | [#7][#6H2]                        | 0.9371 |
| [CX4H2][CX4H2]                    | 0.9898 | [#7X3][#6H2]                      | 0.9334 |
| [CX3](=O)[OX2H1]                  | 0.9785 | OCC[CH2]                          | 0.9257 |
| best positives                    | prob   | best negatives                    | prob   |
| [CX4H2]([#6])[#6]                 | 0.9999 | [CX2H1]#[CX2H0][CX3H1]=[CX3H0]    | 0.0    |
| [OX2H1]                           | 0.9971 | C=CC=CC#C                         | 0.0    |
| [CX3](=[OX1])C                    | 0.9947 | [CX2H0](#[CX2H1])[cX3H0]          | 0.0    |
| [CX4H2][CX4H2]                    | 0.9898 | [CX3H0](=[CX3H1])([OX2H0])[CX2H0] | 0.0    |
| [CX3](=O)[OX2H1]                  | 0.9785 | CCC#CC#C                          | 0.0    |
| [CX4H2]([CX4H2])[CX4H2]           | 0.9688 | CCC=CC#C                          | 0.0    |
| [#7][#6H2][#6H2]                  | 0.9436 | CC=CC#CC                          | 0.0    |
| [#7][#6H2]                        | 0.9371 | [#6X2][#6H1][#6X2]                | 0.0    |
| [#7X3][#6H2]                      | 0.9334 | CC=CCC#C                          | 0.0    |
| OCC[CH2]                          | 0.9257 | [CX2H0](#[CX2H1])[CX4H2]          | 0.0    |
| worst negatives                   | prob   | worst positives                   | prob   |
| [#7H2][#6H0]                      | 0.2692 | [#8][#6][#6H2]                    | 0.5826 |
| [#6H1][#6H2]                      | 0.2619 | [OX1H0]=[CX3H0]([#8])[CX4H2]      | 0.5931 |
| [#6H1]                            | 0.2432 | [#8]=[#6][#8]                     | 0.7553 |
| [#7X3H1]                          | 0.2313 | [CX4H2][CX4H2][CX4H2][CX4H2]      | 0.8275 |
| [CX3H0](=[OX1H0])([OX2H1])[CX4H1] | 0.1962 | [#7H2][#6H2]                      | 0.854  |
| [CX4H2]([CX4H2])[CX4H1]           | 0.1888 | [#7X3H2]                          | 0.8691 |
| [#8]=[#6H0][#6H1]                 | 0.1744 | [CX3](=[OX1])O                    | 0.8712 |
| [#8][#6H0][#6H1]                  | 0.1424 | [CX4H2][CX3]=O                    | 0.8768 |
| CCCCC                             | 0.0969 | [CX4H2]([CX4H2])[CX3H0]           | 0.8926 |
| [#6H2][#7][#6X3]                  | 0.0887 | [CX4H2]([NX3H2])[CX4H2]           | 0.9041 |

---

Example 60 true smiles: NCCCC(=O)O formula: C5H11NO2  
Index of correct structure: 0 of 3703  
True structure loss: 0.013067  
True structure:



Experimental <sup>13</sup>C NMR (solvent: D2O)

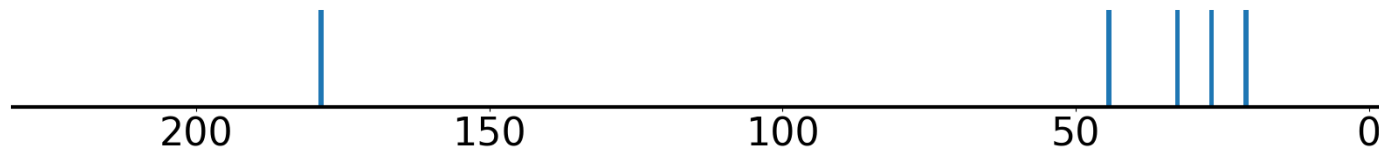

Experimental <sup>1</sup>H NMR (solvent: CDCl3)

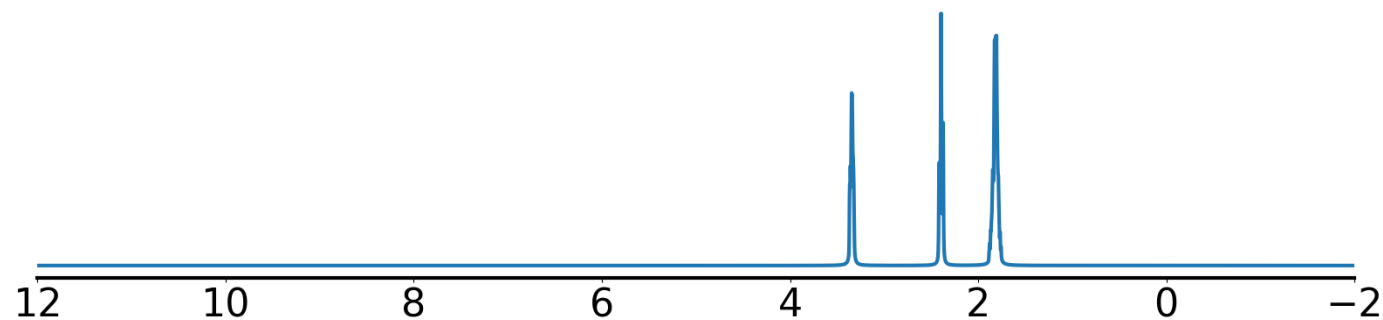

Top predicted structures (loss):

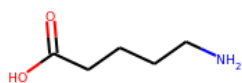

0.013067

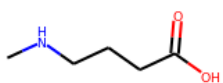

0.044319

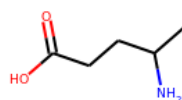

0.044563

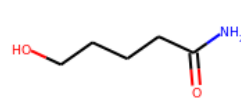

0.053856

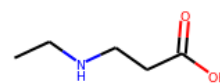

0.055854

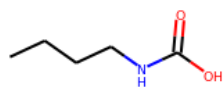

0.05827

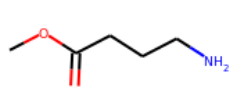

0.060447

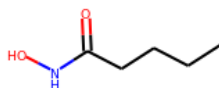

0.060671

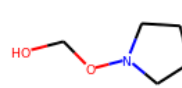

0.062129

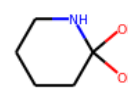

0.063969

|                                   |        |                                   |        |
|-----------------------------------|--------|-----------------------------------|--------|
| Top predicted substructures       | prob   |                                   |        |
| [CX4H2]([#6])[#6]                 | 0.9997 | [CX3](=[OX1])O                    | 0.9267 |
| [OX2H1]                           | 0.9955 | [CX4H2]CC=O                       | 0.9198 |
| [CX3](=[OX1])C                    | 0.9939 | [#7X3][#6H2]                      | 0.9149 |
| [CX3](=O)[OX2H1]                  | 0.9903 | [CX4H2][CX4H2]                    | 0.9055 |
| [#7X3H2]                          | 0.9354 | [#8]=[#6][#8]                     | 0.8731 |
| best positives                    | prob   | best negatives                    | prob   |
| [CX4H2]([#6])[#6]                 | 0.9997 | [CX2H1]#[CX2H0][CX3H1]=[CX3H0]    | 0.0    |
| [OX2H1]                           | 0.9955 | [CX2H0](#[CX2H1])[CX3H0]          | 0.0    |
| [CX3](=[OX1])C                    | 0.9939 | CCC=CC#C                          | 0.0    |
| [CX3](=O)[OX2H1]                  | 0.9903 | C=CC=CC#C                         | 0.0    |
| [#7X3H2]                          | 0.9354 | CC#CCC=C                          | 0.0    |
| [CX3](=[OX1])O                    | 0.9267 | CC=CC#CC                          | 0.0    |
| [CX4H2]CC=O                       | 0.9198 | CCC#CC#C                          | 0.0    |
| [#7X3][#6H2]                      | 0.9149 | [CX2H0](#[CX2H1])[CX4H2]          | 0.0    |
| [CX4H2][CX4H2]                    | 0.9055 | [CX2H0](#[CX2H0])[CX2H0]          | 0.0    |
| [#8]=[#6][#8]                     | 0.8731 | [CX3H0](=[CX3H1])([OX2H0])[CX2H0] | 0.0    |
| worst negatives                   | prob   | worst positives                   | prob   |
| [CX3H0](=[OX1H0])([OX2H1])[CX4H1] | 0.6386 | [#8][#6][#6H2]                    | 0.2864 |
| [#6H1][#6H2]                      | 0.5189 | [CX4H2]([NX3H2])[CX4H2]           | 0.4032 |
| [CX4H2]([CX4H2])[CX4H1]           | 0.4361 | [CX4H2][CX4H2][CX4H2][CX4H2]      | 0.5129 |
| [#8]=[#6H0][#6H1]                 | 0.327  | [OX1H0]=[CX3H0]([#8])[CX4H2]      | 0.5794 |
| [#6H1]                            | 0.2799 | [CX4H2][CX3]=O                    | 0.7031 |
| [CX4H2]([NX3H1])[CX4H2]           | 0.277  | [CX4H2]([CX4H2])[CX3H0]           | 0.7047 |
| [#7X3H1]                          | 0.263  | [CX3H0](=[OX1H0])([OX2H1])[CX4H2] | 0.7413 |
| O=[CX3][CX4H]                     | 0.2276 | [#7H2][#6H2]                      | 0.7751 |
| [CX4H3][#6]                       | 0.2261 | [#7][#6H2]                        | 0.8079 |
| [CX3H0](=[OX1H0])([NX3H1])[CX4H2] | 0.1673 | O=[CX3H0][CX4H2][CX4H2]           | 0.8115 |

---

Example 61 true smiles: CCCC(N)C(=O)O formula: C5H11NO2  
Index of correct structure: 0 of 3703  
True structure loss: 0.01618  
True structure:

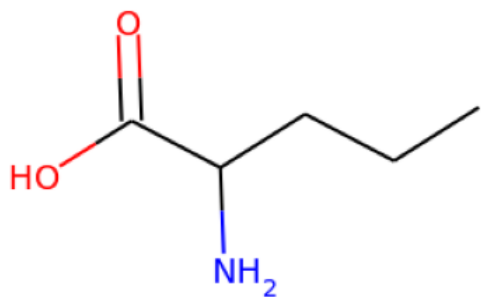

Experimental <sup>13</sup>C NMR (solvent: D<sub>2</sub>O)

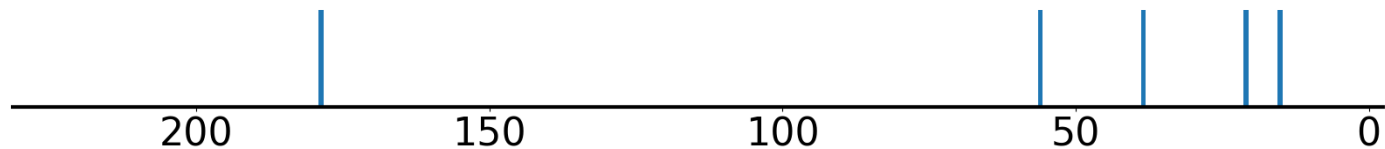

Experimental <sup>1</sup>H NMR (solvent: D<sub>2</sub>O)

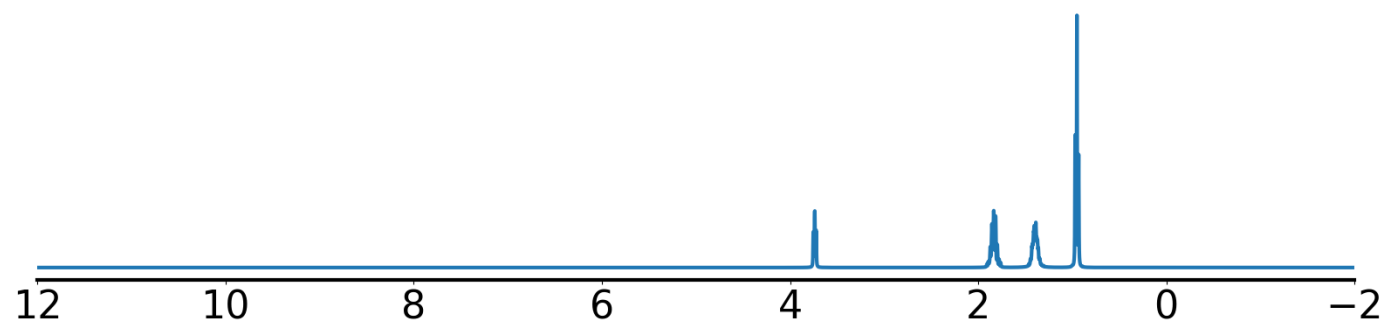

Top predicted structures (loss):

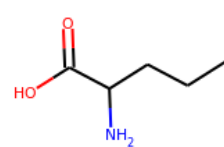

0.01618

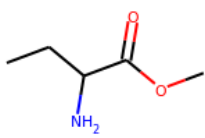

0.040724

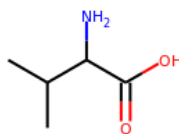

0.043792

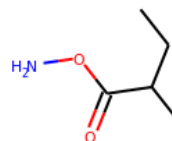

0.047883

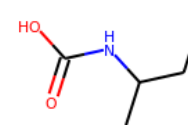

0.052978

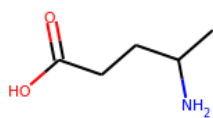

0.054491

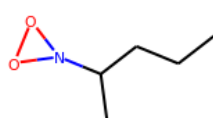

0.055547

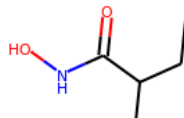

0.056181

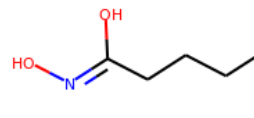

0.057161

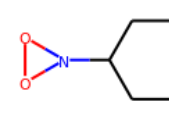

0.058635

| Top predicted substructures | prob   |                                   |        |
|-----------------------------|--------|-----------------------------------|--------|
| [CX4H3]                     | 1.0    | [CX4H3][CX4H2]                    | 0.9839 |
| [#6H3][#6][#6]              | 0.9994 | [OX2H1]                           | 0.9725 |
| [CX4H2]([#6])[#6]           | 0.9958 | [#6H1]                            | 0.9698 |
| [CX4H3][#6]                 | 0.9953 | [#7X3H2]                          | 0.9613 |
| [CX3](=[OX1])C              | 0.9874 | O=[CX3][CX4H]                     | 0.953  |
| best positives              | prob   | best negatives                    | prob   |
| [CX4H3]                     | 1.0    | [CX2H1]#[CX2H0][CX3H1]=[CX3H0]    | 0.0    |
| [#6H3][#6][#6]              | 0.9994 | CCC=CC#C                          | 0.0    |
| [CX4H2]([#6])[#6]           | 0.9958 | C=CC=CC#C                         | 0.0    |
| [CX4H3][#6]                 | 0.9953 | [CX3H0](=[CX3H1])([CX4H2])[CX2H0] | 0.0    |
| [CX3](=[OX1])C              | 0.9874 | CC#CCC=C                          | 0.0    |
| [CX4H3][CX4H2]              | 0.9839 | [CX2H0](#[CX2H1])[cX3H0]          | 0.0    |
| [OX2H1]                     | 0.9725 | CC=CC#CC                          | 0.0    |
| [#6H1]                      | 0.9698 | CCC#CC#C                          | 0.0    |
| [#7X3H2]                    | 0.9613 | CC=CCC#C                          | 0.0    |
| O=[CX3][CX4H]               | 0.953  | [CX3H0](=[CX3H1])([OX2H0])[CX2H0] | 0.0    |
| worst negatives             | prob   | worst positives                   | prob   |
| [#6X3][#6][#6][#6H3]        | 0.7254 | [CX4H2][CX4H2]                    | 0.3276 |
| [#8]=[#6][#6H1][#6H1]       | 0.6122 | [CX4H2]([CX4H2])[CX4H1]           | 0.361  |
| [#7H2][#6H0]                | 0.55   | [#8][#6H0][#6H1]                  | 0.4191 |
| [#7][#6H0][#6H1]            | 0.4041 | [CX4H1]([NX3H2])([CX4H2])[CX3H0]  | 0.4832 |
| [CX4H2]([CX4H3])[CX4H1]     | 0.3409 | OCC[CH2]                          | 0.4987 |
| [CHX4]([CH3X4])[CH2X4]      | 0.3215 | [#7][#6][#6X3]                    | 0.555  |
| [#6H3][#6H1][#6H1][#7]      | 0.3063 | [#7H2][#6H1]                      | 0.7282 |
| [OH][CX4H]                  | 0.2758 | [CX4H2]CC=O                       | 0.7748 |
| [#6H1][#6H1]                | 0.2632 | [#6H1][#6H2]                      | 0.7758 |
| [CX4H3][CX4H1]              | 0.2398 | [CX3H0](=[OX1H0])([OX2H1])[CX4H1] | 0.8049 |

---

Example 62 true smiles: Nc1ccc(O)cc1 formula: C6H7NO  
Index of correct structure: 0 of 3639  
True structure loss: 0.014456  
True structure:

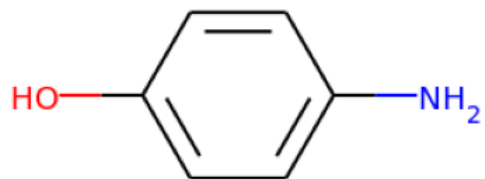

Experimental <sup>13</sup>C NMR (solvent: CDCl<sub>3</sub>)

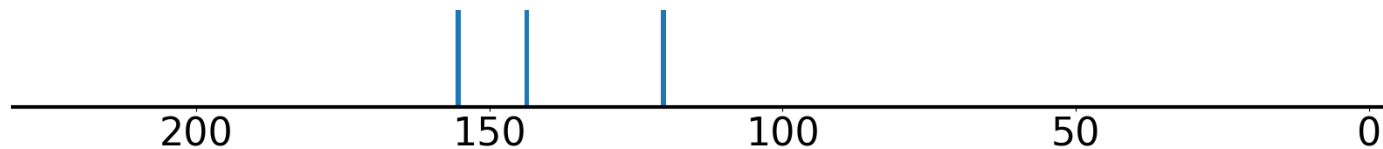

Experimental <sup>1</sup>H NMR (solvent: CDCl<sub>3</sub>)

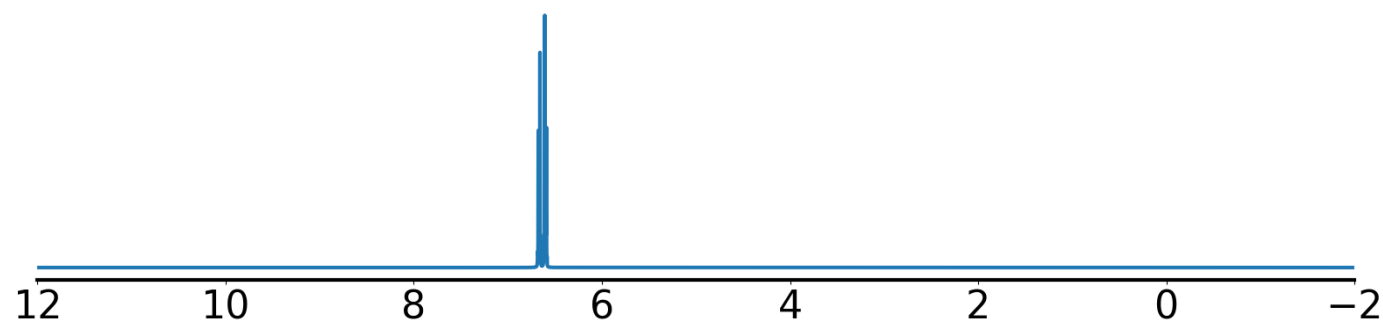

Top predicted structures (loss):

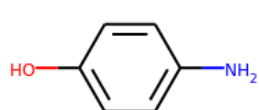

0.014456

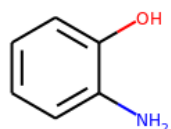

0.01564

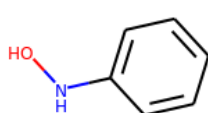

0.017236

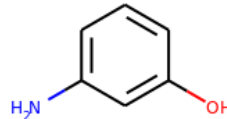

0.018273

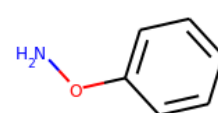

0.019053

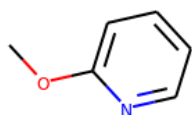

0.033679

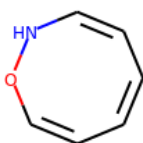

0.038067

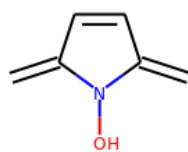

0.038271

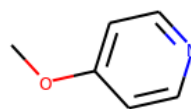

0.038935

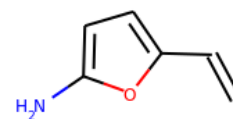

0.039351

|                                 |        |                                           |        |
|---------------------------------|--------|-------------------------------------------|--------|
| Top predicted substructures     | prob   |                                           |        |
| [#6H1]                          | 0.9951 | [cH][cH]                                  | 0.9133 |
| [#6X3][#6X3]                    | 0.9937 | [#7][#6][#6X3]                            | 0.8843 |
| [#6X3][#6X3][#6X3][#6X3]        | 0.9583 | [#7][#6][#6][#6X3]                        | 0.8665 |
| [#6X3H1][#6X3H0]                | 0.9366 | [cX3H1]([cX3H1])[cX3H0]                   | 0.8445 |
| [cH]                            | 0.9182 | [#6H1][#6H1]                              | 0.8359 |
| best positives                  | prob   | best negatives                            | prob   |
| [#6H1]                          | 0.9951 | [OX1H0]=[cX3H0]1[cX4H1][cX4H1][cX4H2]1    | 0.0    |
| [#6X3][#6X3]                    | 0.9937 | [OX2H0][cX4H2][cX4H1]([cX4H1])[cX4H1]     | 0.0    |
| [#6X3][#6X3][#6X3][#6X3]        | 0.9583 | [OX2H0]1[cX4H2][cX4H2][cX4H1][cX4H1]1     | 0.0    |
| [#6X3H1][#6X3H0]                | 0.9366 | [#8][#6H1][#6H2][#6H1]=[#8]               | 0.0    |
| [cH]                            | 0.9182 | [OX2H1][cX4H1]1[cX4H1][cX4H2][cX4H1]1     | 0.0    |
| [cH][cH]                        | 0.9133 | [cX4H1]([OX2H1])([cX4H2])[cX2H0]          | 0.0    |
| [#7][#6][#6X3]                  | 0.8843 | [cX4H0]([NX3H1])([cX4H3])([cX4H2])[cX4H1] | 0.0    |
| [#7][#6][#6][#6X3]              | 0.8665 | [OX2H0][cX4H2][cX4H1]([cX4H2])[cX4H1]     | 0.0    |
| [cX3H1]([cX3H1])[cX3H0]         | 0.8445 | [cX4H1]([OX2H1])([cX4H3])[cX4H1]          | 0.0    |
| [#6H1][#6H1]                    | 0.8359 | [OX2H1][cX4H2][cX4H1]([cX4H2])[cX4H2]     | 0.0    |
| worst negatives                 | prob   | worst positives                           | prob   |
| [cX3H1]([cX3H1])[cX3H1]         | 0.7017 | [cX3H0][cX3H1][cX3H1][cX3H0]              | 0.4082 |
| [#6X3][#7][#6X3]                | 0.4324 | [#6X3H1][#6X3H1][#6X3H0][#6X3H1]          | 0.5256 |
| [#6]1[#6][#6][#6][#6][#7]1      | 0.3094 | [OX2H1]                                   | 0.55   |
| [#7X3H1]                        | 0.2147 | [cH]cO                                    | 0.5598 |
| [#6]1[#6][#6][#6][#7]1          | 0.1769 | [#7][#6X3H0][#6X3H1]                      | 0.5652 |
| [#7H][#6X3H1]                   | 0.1769 | [#8][#6][#6][#6X3]                        | 0.5818 |
| [#6X3][#6X3][#6X3][#6X3]=[#6X3] | 0.1658 | [#7][#6H0][#6H1]                          | 0.5827 |
| [cX3H1]([NX3H1])[cX3H1]         | 0.1526 | [#8][#6H0][#6H1]                          | 0.595  |
| [#6X3][#7X3][#6X3]              | 0.1443 | [OX2H][cX3]:[c]                           | 0.6068 |
| [cHX3](=C)C                     | 0.1398 | [#7H2][#6H0]                              | 0.6205 |

---

Example 63 true smiles: Cc1ccc[nH]c1=O formula: C6H7NO  
 Index of correct structure: 2 of 3639  
 True structure loss: 0.026615  
 True structure:

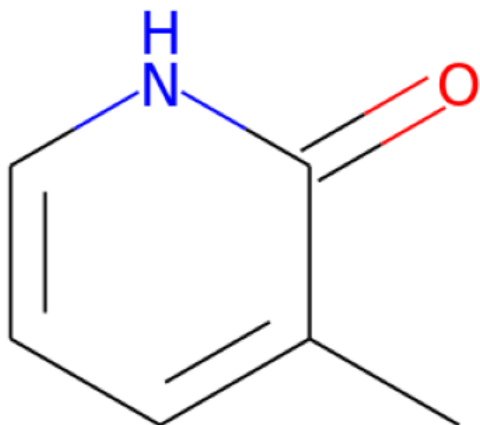

Experimental <sup>13</sup>C NMR (solvent: CDCl<sub>3</sub>)

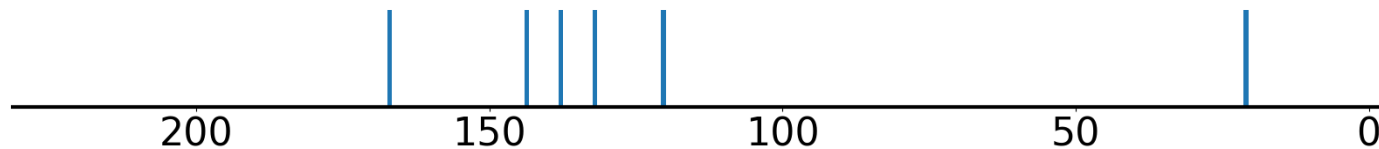

Experimental <sup>1</sup>H NMR (solvent: CDCl<sub>3</sub>)

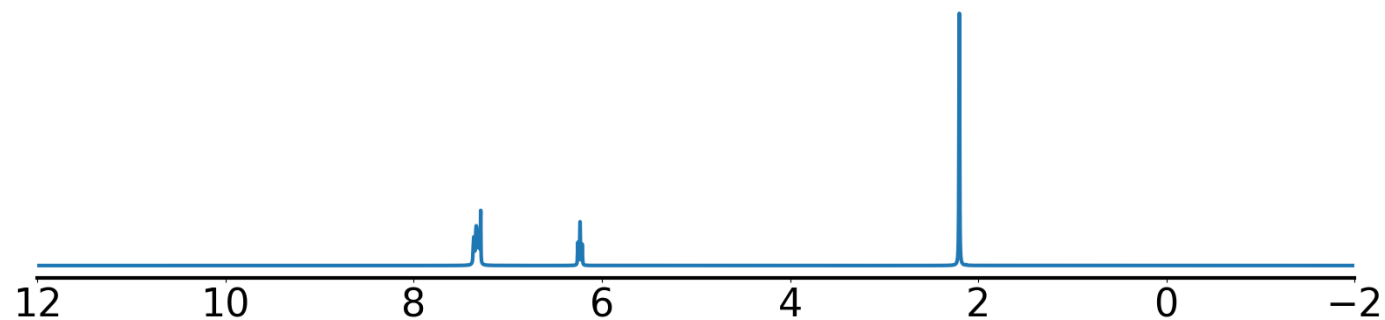

Top predicted structures (loss):

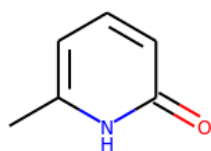

0.021851

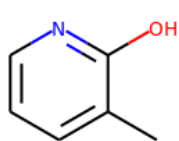

0.025291

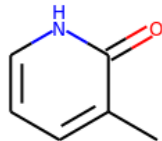

0.026615

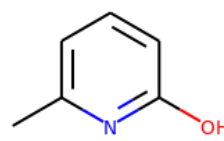

0.028358

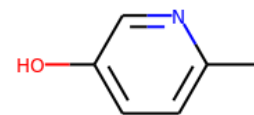

0.03163

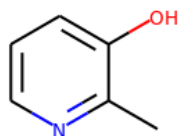

0.03252

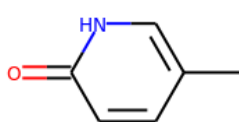

0.033951

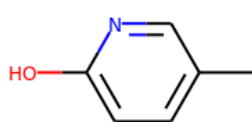

0.034559

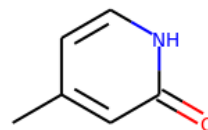

0.038276

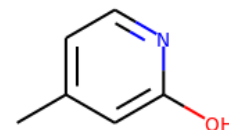

0.040865



|                                  |        |                                           |        |
|----------------------------------|--------|-------------------------------------------|--------|
| Top predicted substructures      | prob   |                                           |        |
| [#6X3][#6X3]                     | 0.9994 | [#6H3][#6][#6]                            | 0.969  |
| [#6H1]                           | 0.9987 | [#6X3H1][#6X3H0]                          | 0.9507 |
| [CX4H3][#6]                      | 0.9981 | [#7][#6][#6X3]                            | 0.9422 |
| [CX4H3]                          | 0.9971 | [cH][cH]                                  | 0.9314 |
| [#6H3][#6H0]                     | 0.9876 | [#6X3][#6X3][#6X3][#6X3]                  | 0.9178 |
| best positives                   | prob   | best negatives                            | prob   |
| [#6X3][#6X3]                     | 0.9994 | [OX1H0]=[CX3H0]1[CX4H1][CX4H1][CX4H2]1    | 0.0    |
| [#6H1]                           | 0.9987 | [OX2H0][CX4H2][CX4H1]([CX4H1])[CX4H1]     | 0.0    |
| [CX4H3][#6]                      | 0.9981 | [OX2H1][CX4H2][CX4H1]([OX2H0])[CX4H1]     | 0.0    |
| [CX4H3]                          | 0.9971 | [OX2H0][CX4H2][CX4H1]([CX4H2])[CX4H1]     | 0.0    |
| [#6H3][#6H0]                     | 0.9876 | [CX4H0]([OX2H0])([CX4H2])([CX4H1])[CX4H1] | 0.0    |
| [#6H3][#6][#6]                   | 0.969  | [OX2H0]1[CX4H2][CX4H1]1[CX4H1]            | 0.0    |
| [#6X3H1][#6X3H0]                 | 0.9507 | [CX4H1]([OX2H1])([CX4H2])[CX2H0]          | 0.0    |
| [#7][#6][#6X3]                   | 0.9422 | [OX2H0]1[CX4H2][CX4H2][CX4H1][CX4H1]1     | 0.0    |
| [cH][cH]                         | 0.9314 | [#8][#6H1][#6H2][#6H1]=[#8]               | 0.0    |
| [#6X3][#6X3][#6X3][#6X3]         | 0.9178 | [OX2H1][CX4H1][CX4H1]([CX4H1])[CX4H1]     | 0.0    |
| worst negatives                  | prob   | worst positives                           | prob   |
| [#7][#6X3H0][#6X3H1]             | 0.6262 | [cX3H1]([nX3H1])[cX3H1]                   | 0.0321 |
| [#8]=[#6H0][#6H1]                | 0.591  | [#7H][#6X3H1]                             | 0.0995 |
| [#7][#6H0][#6H1]                 | 0.5833 | [#7X3H1]                                  | 0.2203 |
| [OX2H1]                          | 0.4969 | [#6X3][#7X3][#6X3]                        | 0.2368 |
| [#7][#6][#6H3]                   | 0.3692 | [cX3H0]([cX3H1])([cX3H0])[CX4H3]          | 0.2751 |
| [OX1H0]=[cX3H0][cX3H1]           | 0.3616 | [cX3H1]([cX3H1])[cX3H1]                   | 0.5041 |
| [CHX3](=C)C                      | 0.3216 | O=[cX3]                                   | 0.5396 |
| [#7X3H2]                         | 0.2955 | O=[#6][#6][#6X3]                          | 0.5542 |
| [#6X3H1][#6X3H1][#6X3H0][#6X3H1] | 0.283  | [#6X3][#6][#6][#6H3]                      | 0.5731 |
| [#6H3][#6]=[#6X3]                | 0.2397 | [#6]1[#6][#6][#6][#6][#7]1                | 0.62   |

---

Example 64 true smiles: CC(=O)c1ccc[nH]1 formula: C6H7NO  
Index of correct structure: 0 of 3639  
True structure loss: 0.022279  
True structure:

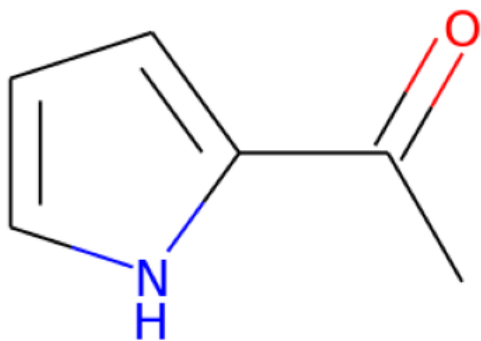

Experimental <sup>13</sup>C NMR (solvent: CDCl<sub>3</sub>)

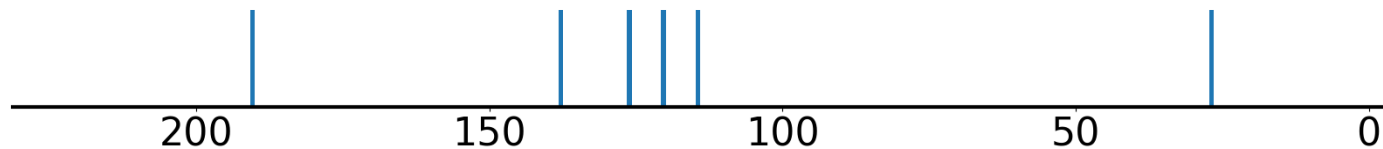

Experimental <sup>1</sup>H NMR (solvent: CDCl<sub>3</sub>)

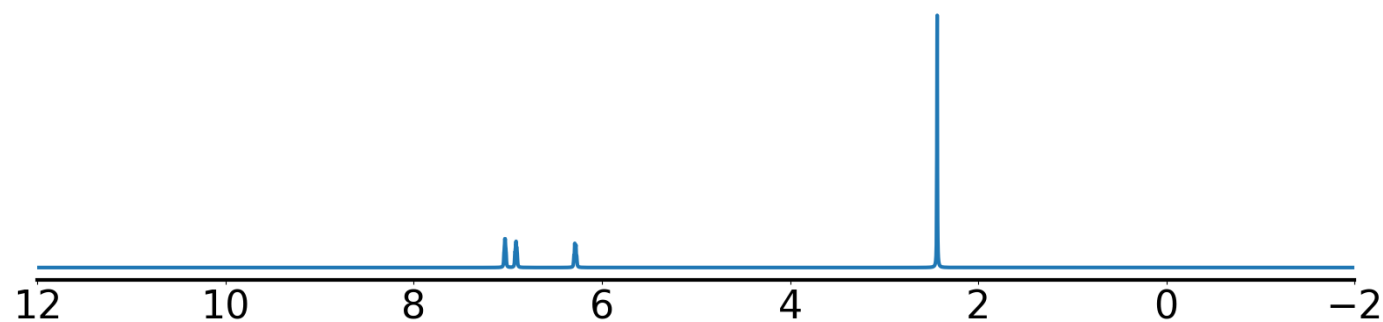

Top predicted structures (loss):

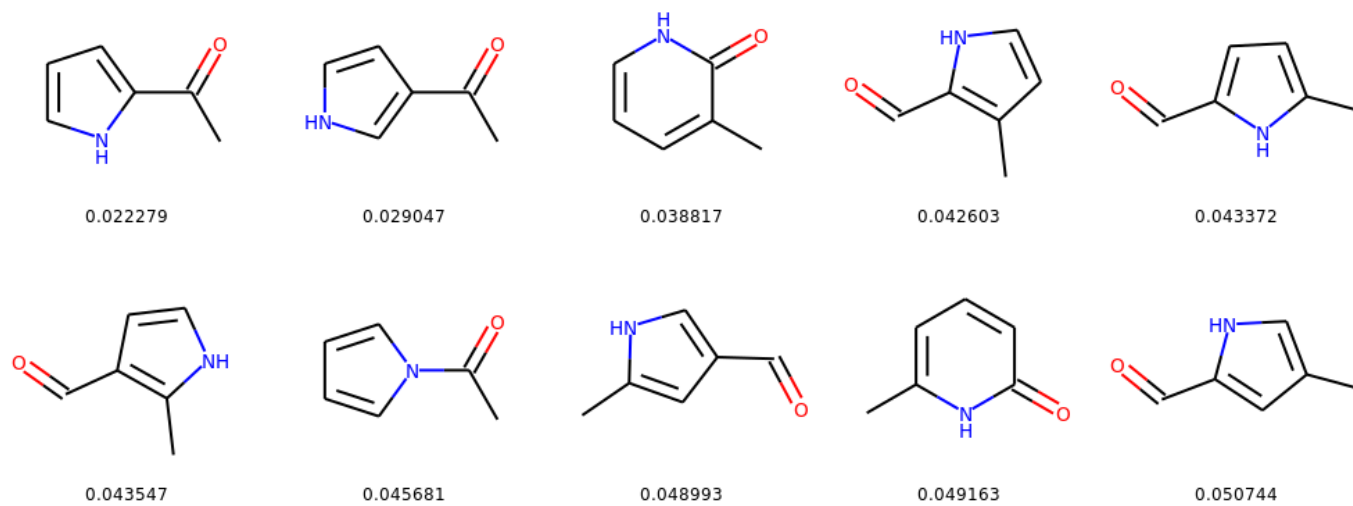

| Top predicted substructures      | prob        |                                              |             |
|----------------------------------|-------------|----------------------------------------------|-------------|
| [#6H1]                           | 0.9964      | [OX1H0]=[CX3H0][CX4H3]                       | 0.9259      |
| [#6X3][#6X3]                     | 0.9911      | [#6H3][#6H0]                                 | 0.9225      |
| [CX4H3]                          | 0.9884      | [#6H1][#6H1]                                 | 0.8845      |
| [#6H3][#6][#6]                   | 0.9632      | [CX4H3][CX3]                                 | 0.8653      |
| [CX4H3][#6]                      | 0.9604      | [cH][cH]                                     | 0.8462      |
| <b>best positives</b>            | <b>prob</b> | <b>best negatives</b>                        | <b>prob</b> |
| [#6H1]                           | 0.9964      | [OX2H0]1[CX4H2][CX4H2][CX4H1][CX4H1]1        | 0.0         |
| [#6X3][#6X3]                     | 0.9911      | [OX2H0][CX4H2][CX4H1]([CX4H1])[CX4H3]        | 0.0         |
| [CX4H3]                          | 0.9884      | [OX2H0][CX4H2][CX4H0][OX2H0]                 | 0.0         |
| [#6H3][#6][#6]                   | 0.9632      | [OX2H0][CX4H2][CX4H1]([CX4H1])[CX4H1]        | 0.0         |
| [CX4H3][#6]                      | 0.9604      | [OX2H0]1[CX4H2][CX4H1][CX4H1]1               | 0.0         |
| [OX1H0]=[CX3H0][CX4H3]           | 0.9259      | [CX4H0]([OX2H0])([CX4H2])([CX4H1])[CX4H1]    | 0.0         |
| [#6H3][#6H0]                     | 0.9225      | [OX2H0]1[CX4H2][CX4H1]1[CX4H1]               | 0.0         |
| [#6H1][#6H1]                     | 0.8845      | [OX2H1][CX4H1]1[CX4H1][CX4H2][CX4H1]1        | 0.0         |
| [CX4H3][CX3]                     | 0.8653      | [OX2H1][CX4H1][CX4H1]([CX4H2])[CX4H2]        | 0.0         |
| [cH][cH]                         | 0.8462      | [OX2H0][CX4H1][CX4H1]([CX4H2][CX4H1])[CX4H1] | 0.0         |
| <b>worst negatives</b>           | <b>prob</b> | <b>worst positives</b>                       | <b>prob</b> |
| O=[#6][#6]=[#6X3]                | 0.5372      | [#7][#6H0][#6H1]                             | 0.2855      |
| [CHX3](=C)C                      | 0.3737      | [#7][#6X3H0][#6X3H1]                         | 0.2927      |
| [CX4H2]([#6])[#6]                | 0.2578      | [#6H1r5][#7]                                 | 0.3125      |
| [#7X3H2]                         | 0.2476      | [cX3H1]([nX3H1])[cX3H1]                      | 0.329       |
| [#7H2][#6H0]                     | 0.2456      | [#6]1[#6][#6][#6][#7]1                       | 0.3496      |
| [#6]#[#7]                        | 0.2436      | [#7X3H1]                                     | 0.4309      |
| [#6H1][#6H2]                     | 0.2259      | [#6X3][#6][#6][#6H3]                         | 0.4659      |
| [#6X3H1][#6X3H1][#6X3H0][#6X3H1] | 0.2223      | [#7H][#6X3H1]                                | 0.4737      |
| [CX4H2][CX4H2]                   | 0.2172      | [cX3H1]([cX3H1])[cX3H1]                      | 0.4826      |
| [CX4H3][CX3H0]                   | 0.1866      | [#7][#6][#6][#6X3]                           | 0.4884      |

---

Example 65 true smiles: Cc1cccc(=O)[nH]1 formula: C6H7NO  
Index of correct structure: 0 of 3639  
True structure loss: 0.018889  
True structure:

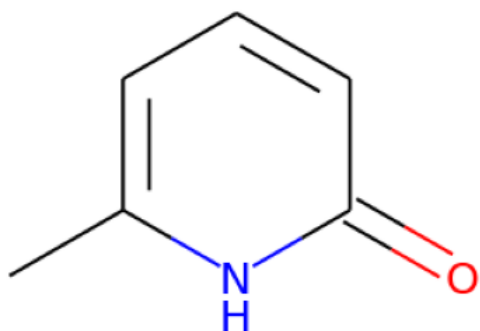

Experimental <sup>13</sup>C NMR (solvent: CDCl<sub>3</sub>)

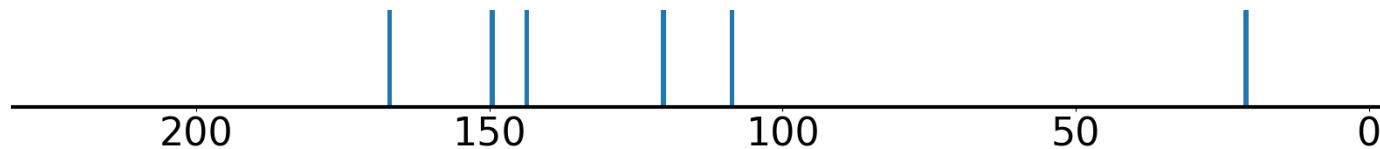

Experimental <sup>1</sup>H NMR (solvent: CDCl<sub>3</sub>)

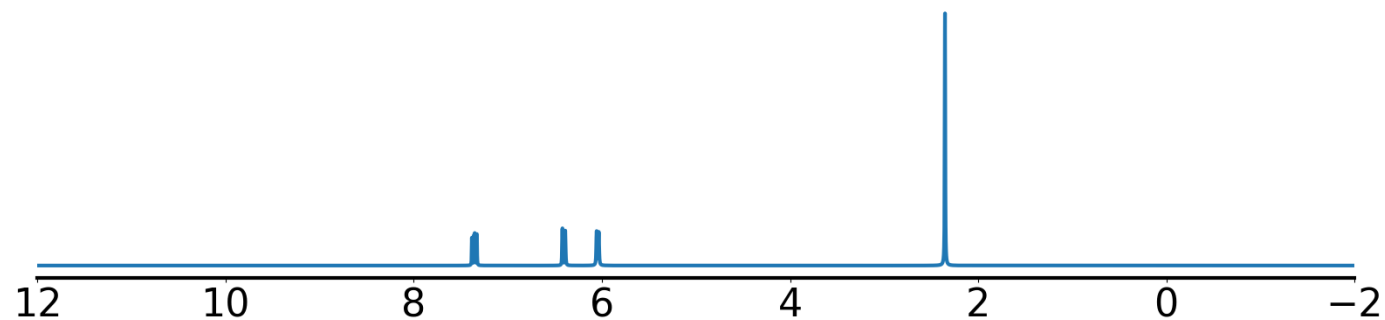

Top predicted structures (loss):

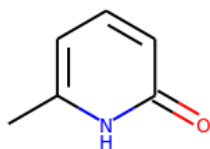

0.018889

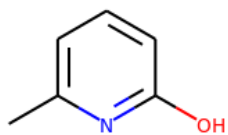

0.025633

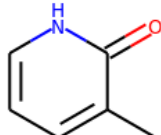

0.029254

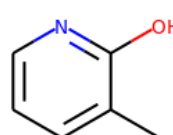

0.029349

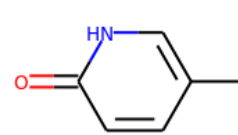

0.029649

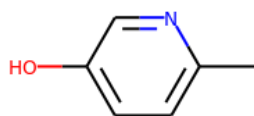

0.029797

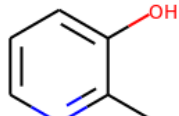

0.031335

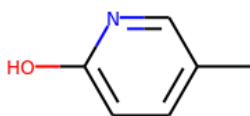

0.032642

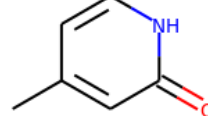

0.033015

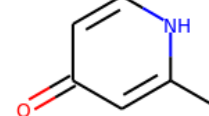

0.034282

| Top predicted substructures      | prob   |                                           | prob   |
|----------------------------------|--------|-------------------------------------------|--------|
| [#6H1]                           | 0.9989 | [cX3H1]([cX3H1])[cX3H0]                   | 0.9802 |
| [#6X3][#6X3]                     | 0.9986 | [CX4H3]                                   | 0.9788 |
| [cH][cH]                         | 0.9943 | [#6X3][#6X3][#6X3][#6X3]                  | 0.9711 |
| [CX4H3][#6]                      | 0.9881 | [cH]                                      | 0.9365 |
| [#6X3H1][#6X3H0]                 | 0.9857 | [#7][#6][#6X3]                            | 0.9303 |
| best positives                   | prob   | best negatives                            | prob   |
| [#6H1]                           | 0.9989 | [OX2H0]1[CX4H2][CX4H2][CX4H1][CX4H1]1     | 0.0    |
| [#6X3][#6X3]                     | 0.9986 | [OX1H0]=[CX3H0]1[CX4H1][CX4H1][CX4H2]1    | 0.0    |
| [cH][cH]                         | 0.9943 | [OX2H0][CX4H2][CX4H1]([CX4H1])[CX4H1]     | 0.0    |
| [CX4H3][#6]                      | 0.9881 | [#8][#6H1][#6H2][#6H1]=[#8]               | 0.0    |
| [#6X3H1][#6X3H0]                 | 0.9857 | [OX2H1][CX4H1][CX4H1]([CX4H1])[CX4H1]     | 0.0    |
| [cX3H1]([cX3H1])[cX3H0]          | 0.9802 | [OX2H1][CX4H2][CX4H1]([CX4H2])[CX4H2]     | 0.0    |
| [CX4H3]                          | 0.9788 | [OX2H0][CX4H2][CX4H2][CX4H1][OX2H0]       | 0.0    |
| [#6X3][#6X3][#6X3][#6X3]         | 0.9711 | [OX2H1][CX4H1]1[CX4H1][CX4H2][CX4H1]1     | 0.0    |
| [cH]                             | 0.9365 | [CX4H0]([CX4H2])([CX4H2])([CX4H1])[CX4H1] | 0.0    |
| [#7][#6][#6X3]                   | 0.9303 | [CX4H1]([NX3H2])([CX4H2])[CX3H1]          | 0.0    |
| worst negatives                  | prob   | worst positives                           | prob   |
| [#8][#6H0][#6H1]                 | 0.6411 | [#7X3H1]                                  | 0.261  |
| [#6X3H1][#6X3H1][#6X3H0][#6X3H1] | 0.5062 | [#6X3][#7X3][#6X3]                        | 0.2929 |
| [#8][#6][#6][#6X3]               | 0.3913 | [#8]=[#6][#6H1][#6H1]                     | 0.3071 |
| [cX3H1]([cX3H0])[cX3H0]          | 0.2753 | [#7][#6][#6H3]                            | 0.4016 |
| [cX3H1]([ox2H0])[cX3H1]          | 0.2596 | O=[cX3]                                   | 0.4845 |
| [cX3H0][cX3H1][cX3H1][cX3H0]     | 0.2345 | [#6]1[#6][#6][#6][#6][#7]1                | 0.5562 |
| [#8][#6H1][#6H1]                 | 0.2197 | [#8]=[#6H0][#6H1]                         | 0.6413 |
| [#6H3][#6H0][#7H0][#6H0]         | 0.1723 | [OX1H0]=[cX3H0][cX3H1]                    | 0.6471 |
| [cX3H1]([nX2H0])[cX3H1]          | 0.1685 | O=[#6][#6][#6X3]                          | 0.6626 |
| [#7H2][#6H0]                     | 0.1585 | [cX3H1]([cX3H1])[cX3H1]                   | 0.7113 |

---

Example 66 true smiles: Nc1ccc(O)cc1 formula: C6H7NO  
Index of correct structure: 0 of 3639  
True structure loss: 0.015917  
True structure:



Experimental <sup>13</sup>C NMR (solvent: DMSO)

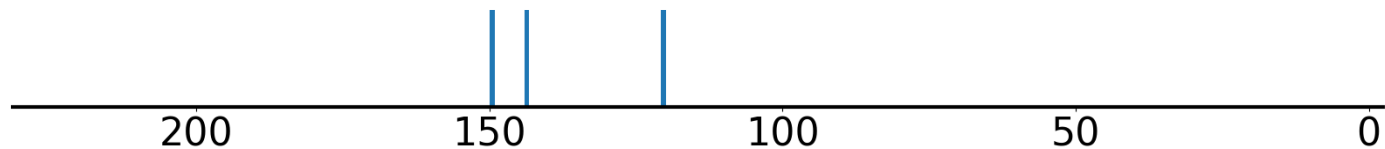

Experimental <sup>1</sup>H NMR (solvent: CDCl<sub>3</sub>)

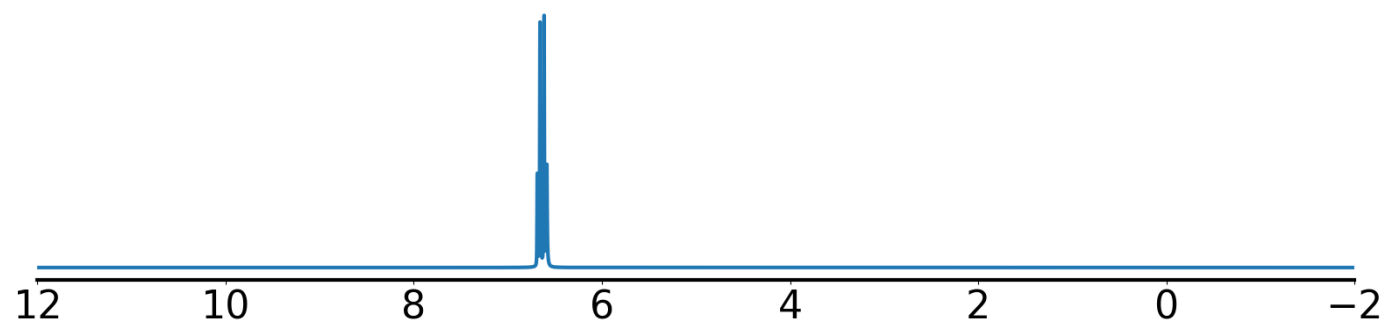

Top predicted structures (loss):

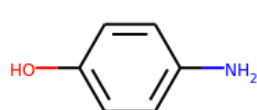

0.015917

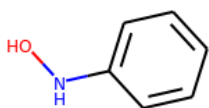

0.016321

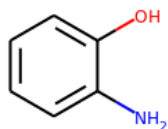

0.016459

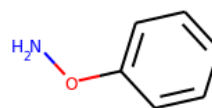

0.017054

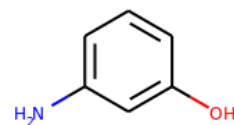

0.018874



0.036082

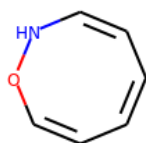

0.036564



0.038092

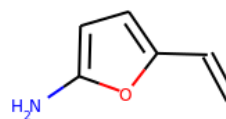

0.038165

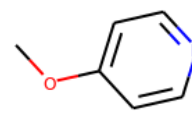

0.040932

|                             |        |                                           |        |
|-----------------------------|--------|-------------------------------------------|--------|
| Top predicted substructures | prob   |                                           |        |
| [#6H1]                      | 0.994  | [cH]                                      | 0.8872 |
| [#6X3][#6X3]                | 0.9916 | [cX3H1]([cX3H1])[cX3H0]                   | 0.8649 |
| [#6X3][#6X3][#6X3][#6X3]    | 0.9268 | [#6H1][#6H1]                              | 0.8164 |
| [#6X3H1][#6X3H0]            | 0.9192 | [#7][#6][#6X3]                            | 0.7911 |
| [cH][cH]                    | 0.8966 | [#7][#6][#6][#6X3]                        | 0.7567 |
| best positives              | prob   | best negatives                            | prob   |
| [#6H1]                      | 0.994  | [OX2H0]1[CX4H2][CX4H2][CX4H1][CX4H1]1     | 0.0    |
| [#6X3][#6X3]                | 0.9916 | [OX1H0]=[CX3H0]1[CX4H1][CX4H1][CX4H2]1    | 0.0    |
| [#6X3][#6X3][#6X3][#6X3]    | 0.9268 | [OX2H1][CX4H1]1[CX4H1][CX4H2][CX4H1]1     | 0.0    |
| [#6X3H1][#6X3H0]            | 0.9192 | [OX2H0][CX4H2][CX4H2][CX4H1][OX2H0]       | 0.0    |
| [cH][cH]                    | 0.8966 | [CX4H0]([NX3H1])([CX4H3])([CX4H2])[CX4H1] | 0.0    |
| [cH]                        | 0.8872 | [OX2H0][CX4H2][CX4H1]([CX4H1])[CX4H1]     | 0.0    |
| [cX3H1]([cX3H1])[cX3H0]     | 0.8649 | [CX4H1]([CX4H3])([CX4H2])[CX4H0]          | 0.0    |
| [#6H1][#6H1]                | 0.8164 | [CX4H0]([CX4H3])([CX4H2])([CX4H1])[CX4H1] | 0.0    |
| [#7][#6][#6X3]              | 0.7911 | [OX2H1][CX4H2][CX4H1]([CX4H2])[CX4H2]     | 0.0    |
| [#7][#6][#6][#6X3]          | 0.7567 | [OX2H0][CX4H2][CX4H1]([CX4H1])[CX4H3]     | 0.0    |
| worst negatives             | prob   | worst positives                           | prob   |
| [cX3H1]([cX3H1])[cX3H1]     | 0.7149 | [cX3H0][cX3H1][cX3H1][cX3H0]              | 0.2257 |
| [#6X3][#7][#6X3]            | 0.3167 | [#8][#6H0][#6H1]                          | 0.4292 |
| [#7X3H1]                    | 0.1862 | [#7H2][#6H0]                              | 0.4944 |
| [#6]1[#6][#6][#6][#7]1      | 0.1815 | [OX2H][cX3]:[c]                           | 0.5058 |
| [cX3H1]([nX3H1])[cX3H1]     | 0.1616 | [#7][#6H0][#6H1]                          | 0.5097 |
| [CX3H1](=[CX3H1])[CX3H0]    | 0.1569 | [#7][#6X3H0][#6X3H1]                      | 0.5117 |
| [#7H][#6X3H1]               | 0.1421 | [#6X3H1][#6X3H1][#6X3H0][#6X3H1]          | 0.538  |
| [CHX3]=[CHX3]               | 0.1406 | [#8][#6][#6][#6X3]                        | 0.5505 |
| [#6X3][#6X3][#6X3]=[#6X3]   | 0.1382 | [#6]1[#6][#6][#6][#6]1                    | 0.5859 |
| [CHX3](=C)C                 | 0.1368 | [cH]cO                                    | 0.6107 |

---

Example 67 true smiles: Cc1ccc(=O)[nH]c1 formula: C6H7NO  
Index of correct structure: 7 of 3639  
True structure loss: 0.025019  
True structure:

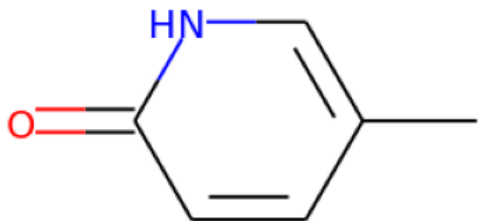

Experimental <sup>13</sup>C NMR (solvent: DMSO)

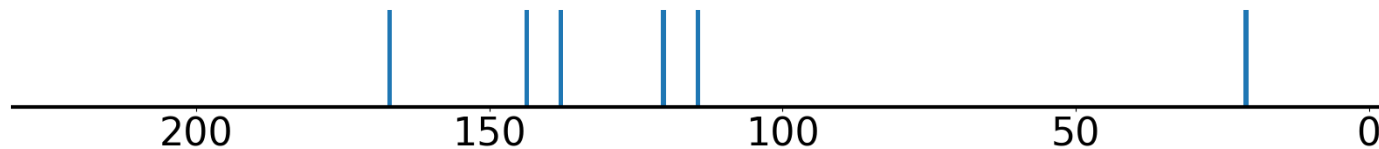

Experimental <sup>1</sup>H NMR (solvent: CDCl3)

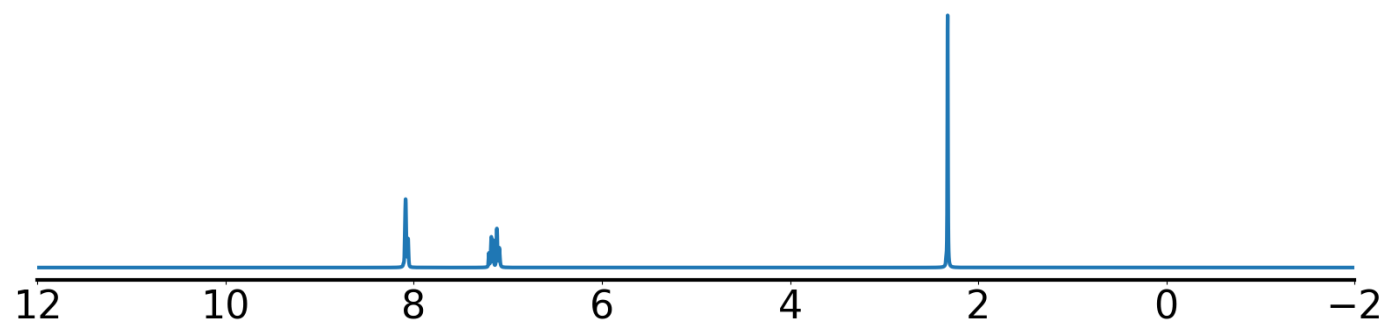

Top predicted structures (loss):

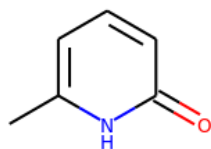

0.0201

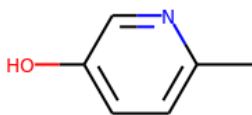

0.02148

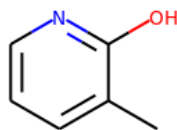

0.022151

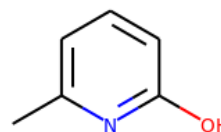

0.022284

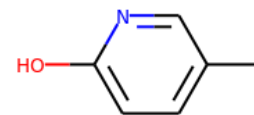

0.022527

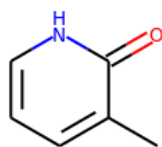

0.024836

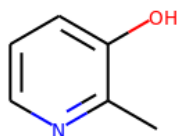

0.024973

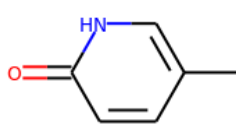

0.025019

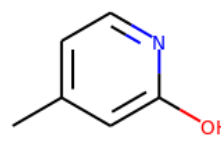

0.028234

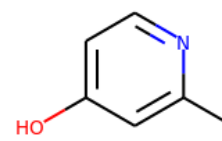

0.028482



| Top predicted substructures | prob        |                                        | prob        |
|-----------------------------|-------------|----------------------------------------|-------------|
| [#6X3][#6X3]                | 0.9991      | [cX3H1]([cX3H1])[cX3H0]                | 0.9874      |
| [#6H1]                      | 0.9987      | [#6H3][#6H0]                           | 0.9847      |
| [cH][cH]                    | 0.9977      | [CX4H3]                                | 0.9825      |
| [CX4H3][#6]                 | 0.9958      | [cH]                                   | 0.981       |
| [#6X3][#6X3][#6X3][#6X3]    | 0.9926      | [#6X3][#6][#6][#6H3]                   | 0.9765      |
| <b>best positives</b>       | <b>prob</b> | <b>best negatives</b>                  | <b>prob</b> |
| [#6X3][#6X3]                | 0.9991      | [OX2H0]1[CX4H2][CX4H2][CX4H1][CX4H1]1  | 0.0         |
| [#6H1]                      | 0.9987      | [OX2H0][CX4H2][CX4H1]([CX4H1])[CX4H1]  | 0.0         |
| [cH][cH]                    | 0.9977      | [OX1H0]=[CX3H0]1[CX4H1][CX4H1][CX4H2]1 | 0.0         |
| [CX4H3][#6]                 | 0.9958      | [OX2H1][CX4H1][CX4H1]([CX4H1])[CX4H1]  | 0.0         |
| [#6X3][#6X3][#6X3][#6X3]    | 0.9926      | [#8][#6H1][#6H2][#6H1]=[#8]            | 0.0         |
| [cX3H1]([cX3H1])[cX3H0]     | 0.9874      | [CX4H1]([OX2H1])([CX4H2])[CX2H0]       | 0.0         |
| [#6H3][#6H0]                | 0.9847      | [OX2H1][CX4H1]1[CX4H1][CX4H2][CX4H1]1  | 0.0         |
| [CX4H3]                     | 0.9825      | [OX2H0]1[CX4H2][CX4H1][CX4H1]1         | 0.0         |
| [cH]                        | 0.981       | [CX4H1]([NX3H2])([CX4H2])[CX3H1]       | 0.0         |
| [#6X3][#6][#6][#6H3]        | 0.9765      | [OX2H0][CX4H2][CX4H1]([CX4H2])[CX4H1]  | 0.0         |
| <b>worst negatives</b>      | <b>prob</b> | <b>worst positives</b>                 | <b>prob</b> |
| [cX3H1]([cX3H1])[cX3H1]     | 0.6229      | [cX3H1]([nX3H1])[cX3H0]                | 0.0509      |
| [#8][#6][#6][#6X3]          | 0.5198      | [#7H][#6X3H1]                          | 0.1924      |
| [#6]1[#6][#6][#6][#6][#6]1  | 0.4919      | [#6H3][#6H0][#6H1][#7]                 | 0.2246      |
| [#7][#6][#6H3]              | 0.441       | [#7X3H1]                               | 0.2317      |
| [#8][#6H0][#6H1]            | 0.4295      | [#8]=[#6][#6H1][#6H1]                  | 0.244       |
| [cX3H1]([nX2H0])[cX3H1]     | 0.3516      | [#8]=[#6H0][#6H1]                      | 0.2469      |
| [OX2H][cX3]:[c]             | 0.3225      | [OX1H0]=[cX3H0][cX3H1]                 | 0.349       |
| [cX3H1]([cX3H0])[cX3H0]     | 0.2778      | [#6X3][#7X3][#6X3]                     | 0.3921      |
| [OX2H1]                     | 0.2355      | O=[cX3]                                | 0.5208      |
| [#7H2][#6H0]                | 0.2172      | [#6X3H1][#6X3H1][#6X3H0][#6X3H1]       | 0.6062      |

---

Example 68 true smiles: Cc1ccc(O)cn1 formula: C6H7NO  
Index of correct structure: 0 of 3639  
True structure loss: 0.014215  
True structure:

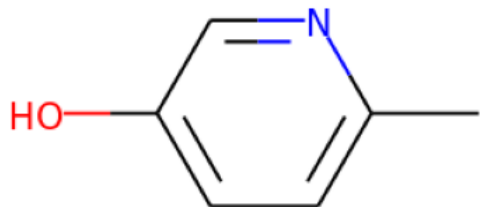

Experimental <sup>13</sup>C NMR (solvent: DMSO)

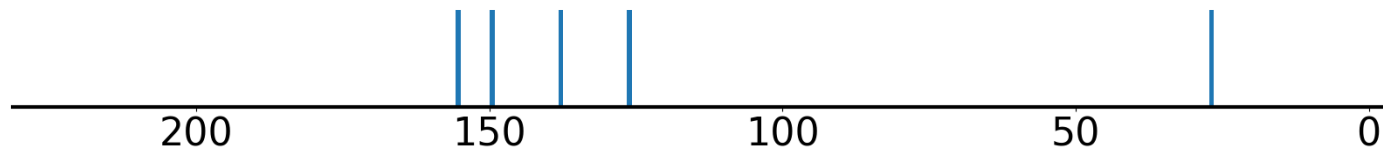

Experimental <sup>1</sup>H NMR (solvent: CDCl<sub>3</sub>)

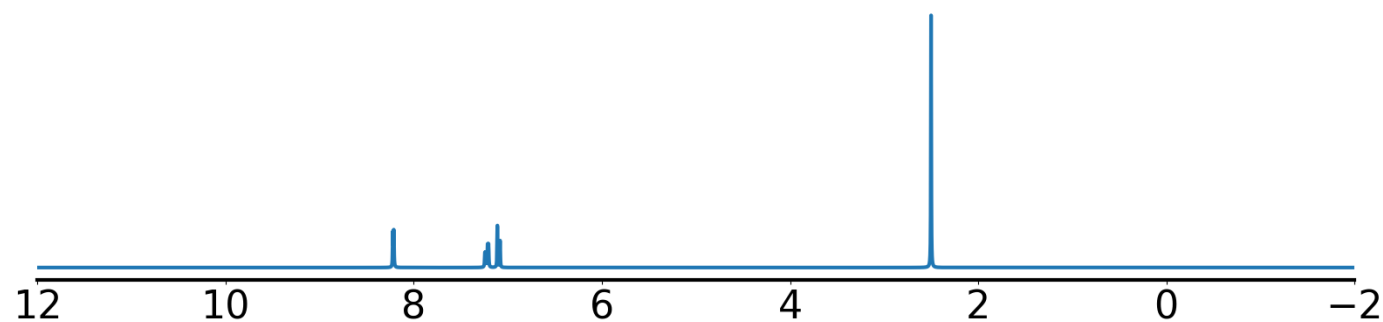

Top predicted structures (loss):

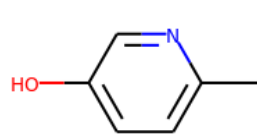

0.014215

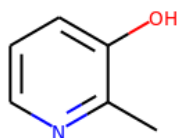

0.01648

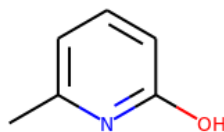

0.016908

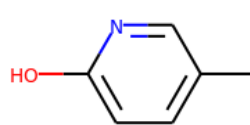

0.01717

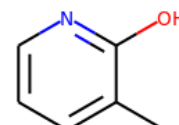

0.018078

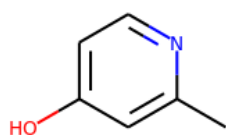

0.020607

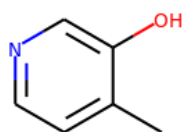

0.020746

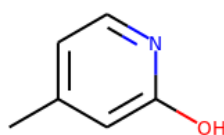

0.021498

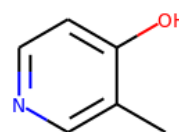

0.02281

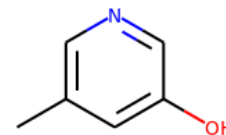

0.038462

|                             |        |                                        |        |
|-----------------------------|--------|----------------------------------------|--------|
| Top predicted substructures | prob   |                                        |        |
| [#6H1]                      | 0.9995 | [cH]                                   | 0.9883 |
| [#6X3][#6X3]                | 0.9992 | [#6H3][#6][#6]                         | 0.9882 |
| [#6X3][#6X3][#6X3][#6X3]    | 0.9968 | [#6X3H1][#6X3H0]                       | 0.9762 |
| [cH][cH]                    | 0.9949 | [#7][#6][#6][#6X3]                     | 0.9745 |
| [#7][#6][#6X3]              | 0.9946 | [CX4H3][cX3H0]                         | 0.9574 |
| best positives              | prob   | best negatives                         | prob   |
| [#6H1]                      | 0.9995 | {OX1H0}={CX3H0}1{CX4H1}{CX4H1}{CX4H2}1 | 0.0    |
| [#6X3][#6X3]                | 0.9992 | {OX2H0}1{CX4H2}{CX4H1}{CX4H1}1         | 0.0    |
| [#6X3][#6X3][#6X3][#6X3]    | 0.9968 | {#8}{#6H1}{#6H2}{#6H1}={#8}            | 0.0    |
| [cH][cH]                    | 0.9949 | {CX4H1}({OX2H1})({CX4H2}){CX2H0}       | 0.0    |
| [#7][#6][#6X3]              | 0.9946 | {#6}1{#8}{#6}{#6}1={#8}                | 0.0    |
| [cH]                        | 0.9883 | {CX3H0}={OX1H0}({CX4H1}){CX4H0}        | 0.0    |
| [#6H3][#6][#6]              | 0.9882 | {CX3H2}={CX3H1}{CX4H0}{OX2H1}          | 0.0    |
| [#6X3H1][#6X3H0]            | 0.9762 | {OX2H0}{CX4H2}{CX4H1}({CX4H1}){CX4H1}  | 0.0    |
| [#7][#6][#6][#6X3]          | 0.9745 | {OX2H1}{CX4H0}{CX4H2}{CX4H0}           | 0.0    |
| [CX4H3][cX3H0]              | 0.9574 | {OX1H0}={CX3H1}{CX4H2}{CX4H0}          | 0.0    |
| worst negatives             | prob   | worst positives                        | prob   |
| {CX3H1}({nX2H0}){CX3H1}     | 0.8243 | {CX3H0}{CX3H1}{CX3H1}{cX3H0}           | 0.308  |
| {CX3H1}({cX3H1}){cX3H1}     | 0.6093 | {OX2H}{cX3}:[c]                        | 0.4507 |
| {#6}1{#6}{#6}{#6}{#6}{#6}1  | 0.4328 | {#8}{#6H0}{#6H1}                       | 0.5102 |
| {#6H1}{#7}{#6H1}            | 0.2702 | {cH}cO                                 | 0.6077 |
| o{cH}                       | 0.1784 | {CX3H1}({nX2H0}){cX3H0}                | 0.6364 |
| [CX4H2]{CX4H2}              | 0.1745 | {#7}{#6H0}{#6H1}                       | 0.6517 |
| {CX3H1}({cX3H0}){cX3H0}     | 0.1509 | {#7}{#6X3H0}{#6X3H1}                   | 0.6748 |
| O={cX3}                     | 0.1503 | {OX2H1}                                | 0.6857 |
| {#7H2}{#6H0}                | 0.1391 | {#7}{#6}{#6H3}                         | 0.7011 |
| {#6H3}{#6H0}{#6H1}{#7}      | 0.1218 | {#6X3H1}{#6X3H1}{#6X3H0}{#6X3H1}       | 0.7104 |

---

Example 69 true smiles: O=C1CCC(=O)N1O formula: C4H5NO3  
 Index of correct structure: 0 of 3337  
 True structure loss: 0.036294  
 True structure:

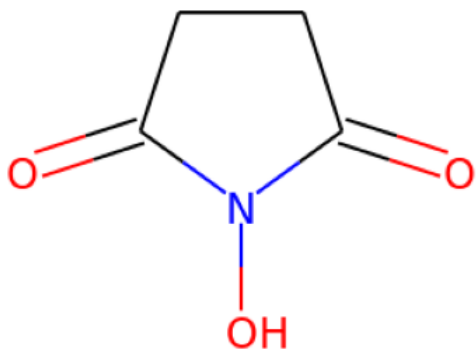

Experimental <sup>13</sup>C NMR (solvent: DMSO-d<sub>6</sub>)

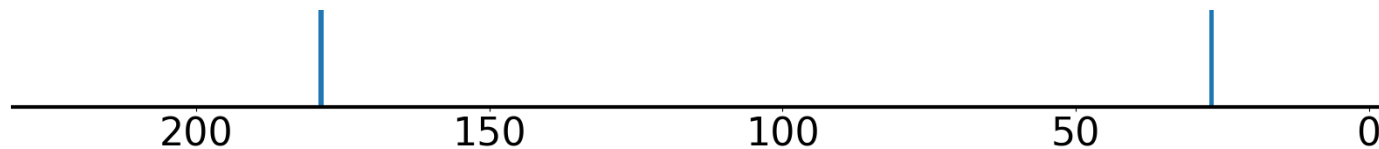

Experimental <sup>1</sup>H NMR (solvent: D<sub>2</sub>O)

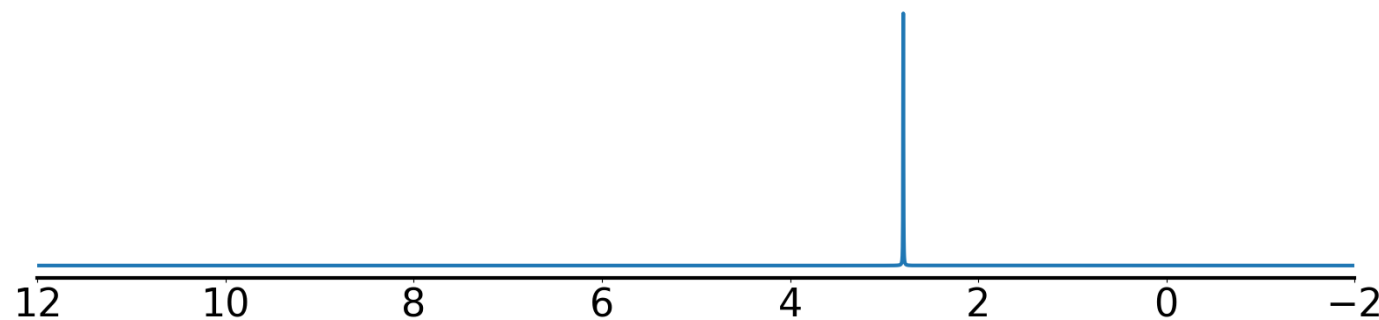

Top predicted structures (loss):

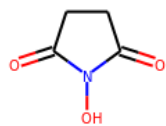

0.036294

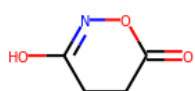

0.042469

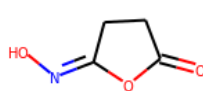

0.042616

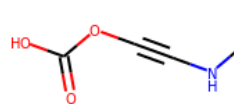

0.04262

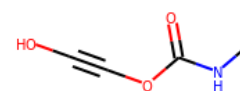

0.043709

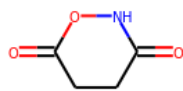

0.044092

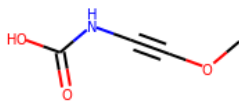

0.045782

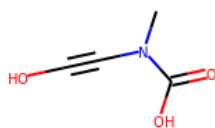

0.047579

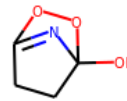

0.048092

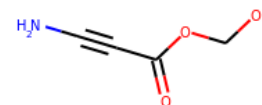

0.048961

|                                |        |                                    |        |
|--------------------------------|--------|------------------------------------|--------|
| Top predicted substructures    | prob   |                                    |        |
| [CX3](=[OX1])C                 | 0.9693 | [CX4H2]CC=O                        | 0.5649 |
| [#8]=[#6][#8]                  | 0.9048 | [#7X3H1]                           | 0.5516 |
| [OX2H1]                        | 0.7909 | O=[CX3][CX4H]                      | 0.546  |
| [CX3](=[OX1])O                 | 0.765  | [CX3](=O)[OX2H1]                   | 0.5445 |
| [#7][#6][#6X3]                 | 0.7026 | [CX4H2][CX3]=O                     | 0.4891 |
| best positives                 | prob   | best negatives                     | prob   |
| [CX3](=[OX1])C                 | 0.9693 | [CX3H0](=[CX3H2])([CX4H3])[CX4H1]  | 0.0    |
| [OX2H1]                        | 0.7909 | [#6X3H2]=[#6][#6H2][#8H]           | 0.0    |
| [CX4H2]CC=O                    | 0.5649 | [#6X3H1]=[#6X3H1][#6X3H0]=[#6X3H1] | 0.0    |
| [CX4H2][CX3]=O                 | 0.4891 | CC=CC#CC                           | 0.0    |
| [CX4H2][CX4H2]                 | 0.4783 | [CX3H1](=[CX3H2])[CX4H0]           | 0.0    |
| [#8]=[#6][#6][#6][#6]=[#8]     | 0.4352 | [CX2H1]#[CX2H0][CX3H1]=[CX3H0]     | 0.0    |
| [CX4H2]([#6])[#6]              | 0.4114 | [CX3H0](=[CX3H2])([CX4H2])[CX4H2]  | 0.0    |
| [#6X3H0][CX4H2][CX4H2][#6X3H0] | 0.3634 | [#8]1[#6][#6]=[#6][#6]=[#6]1       | 0.0    |
| O=[CX3H0][CX4H2][CX4H2]        | 0.312  | [#8][#6H2][#6H1]=[#6H0]            | 0.0    |
| [CX4H2]( [CX4H2] ) [CX3H0]     | 0.2522 | [CX3H0](=[CX3H2])([CX4H1])[CX3H1]  | 0.0    |
| worst negatives                | prob   | worst positives                    | prob   |
| [#8]=[#6][#8]                  | 0.9048 | [#6X3][#7X3][#6X3]                 | 0.0468 |
| [CX3](=[OX1])O                 | 0.765  | [#6]1[#6][#6][#6][#7]1             | 0.13   |
| [#7][#6][#6X3]                 | 0.7026 | [CX3H0](=[OX1H0])([NX3H0])[CX4H2]  | 0.1403 |
| [#7X3H1]                       | 0.5516 | [#6X3][#7][#6X3]                   | 0.1464 |
| O=[CX3][CX4H]                  | 0.546  | [#7X3H0]                           | 0.2023 |
| [CX3](=O)[OX2H1]               | 0.5445 | [CX4H2]( [CX4H2] ) [CX3H0]         | 0.2522 |
| [#7][#6][#6][#6X3]             | 0.4025 | O=[CX3H0][CX4H2][CX4H2]            | 0.312  |
| [#8]=[#6H0][#6H1]              | 0.3922 | [#6X3H0][CX4H2][CX4H2][#6X3H0]     | 0.3634 |
| [#6H1][#6H1]                   | 0.3124 | [CX4H2]( [#6] ) [ #6 ]             | 0.4114 |
| [#6H3][#7][#6X3]               | 0.2966 | [#8]=[#6][#6][#6][#6]=[#8]         | 0.4352 |

---

Example 70 true smiles: O=C(O)CCCC(=O)O formula: C5H8O4  
Index of correct structure: 0 of 3240  
True structure loss: 0.006856  
True structure:

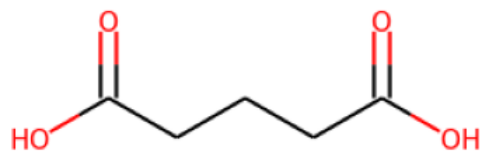

Experimental <sup>13</sup>C NMR (solvent: D<sub>2</sub>O)

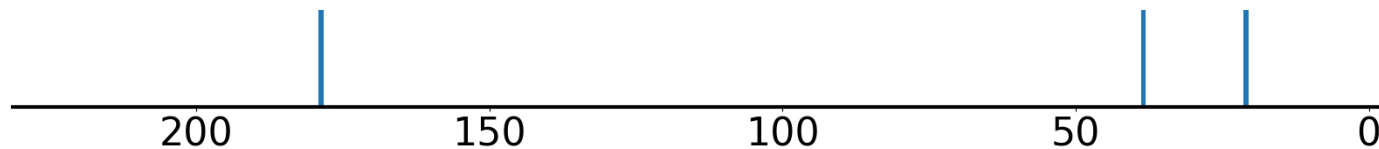

Experimental <sup>1</sup>H NMR (solvent: D<sub>2</sub>O)

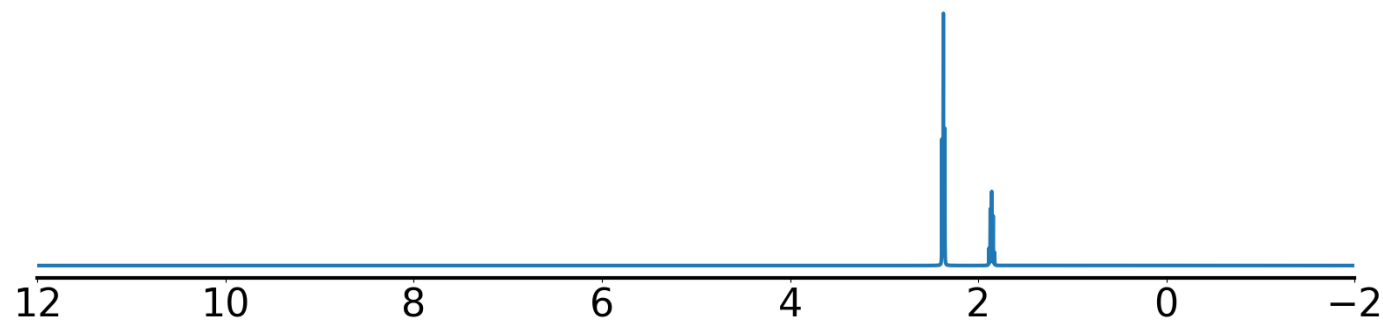

Top predicted structures (loss):

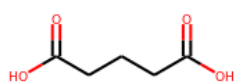

0.006856

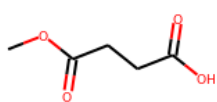

0.049658

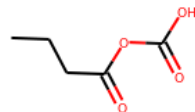

0.051419

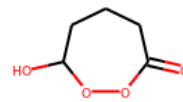

0.053181

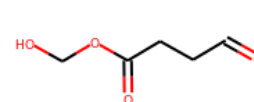

0.067022

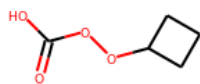

0.069207

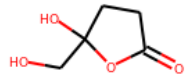

0.072057

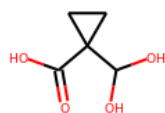

0.073864

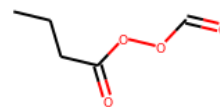

0.078546

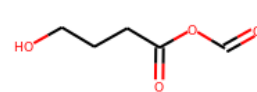

0.078714

|                                   |        |                                    |        |
|-----------------------------------|--------|------------------------------------|--------|
| Top predicted substructures       | prob   |                                    |        |
| [#8]=[#6][#8]                     | 0.9995 | [CX3](=O)[OX2H1]                   | 0.9928 |
| [CX4H2]([#6])[#6]                 | 0.9994 | [CX3H0](=[OX1H0])([OX2H1])[CX4H2]  | 0.9675 |
| [CX3](=[OX1])C                    | 0.9993 | OCC[CH2]                           | 0.9647 |
| [OX2H1]                           | 0.999  | [OX1H0]=[CX3H0]([#8])[CX4H2]       | 0.9249 |
| [CX3](=[OX1])O                    | 0.9987 | O=[CX3H0][CX4H2][CX4H2]            | 0.9091 |
| best positives                    | prob   | best negatives                     | prob   |
| [#8]=[#6][#8]                     | 0.9995 | CCC=CC#C                           | 0.0    |
| [CX4H2]([#6])[#6]                 | 0.9994 | [CX2H1]#[CX2H0][CX3H1]=[CX3H0]     | 0.0    |
| [CX3](=[OX1])C                    | 0.9993 | [CX3H0](=[CX3H1])([CX4H1])[CX2H0]  | 0.0    |
| [OX2H1]                           | 0.999  | CC#CCC=C                           | 0.0    |
| [CX3](=[OX1])O                    | 0.9987 | CC=CC#CC                           | 0.0    |
| [CX3](=O)[OX2H1]                  | 0.9928 | [#6X3H1]=[#6X3H1][#6X3H0]=[#6X3H1] | 0.0    |
| [CX3H0](=[OX1H0])([OX2H1])[CX4H2] | 0.9675 | C=CC=CC#C                          | 0.0    |
| OCC[CH2]                          | 0.9647 | CC=CCC#C                           | 0.0    |
| [OX1H0]=[CX3H0]([#8])[CX4H2]      | 0.9249 | [#7][#6]=[#6][#6][#7]              | 0.0    |
| O=[CX3H0][CX4H2][CX4H2]           | 0.9091 | [#6X3H2]=[#6][#6H2][#8H]           | 0.0    |
| worst negatives                   | prob   | worst positives                    | prob   |
| [CX3H0](=[OX1H0])([OX2H1])[CX4H1] | 0.4232 | [CX4H2]([CX4H2])[CX4H2]            | 0.6467 |
| [#8][#6H0][#6H1]                  | 0.2917 | [#8][#6][#6H2]                     | 0.6586 |
| [#8][#6][#6][#8]                  | 0.2645 | [CX4H2][CX4H2]                     | 0.7593 |
| [#6H1]                            | 0.2518 | [CX4H2]([CX4H2])[CX3H0]            | 0.7608 |
| [#6H1][#6H2]                      | 0.1751 | [CX4H2]CC=O                        | 0.8178 |
| C1CCC1                            | 0.1518 | [CX4H2][CX3]=O                     | 0.8831 |
| [#6H1][#6H1]                      | 0.1502 | O=[CX3H0][CX4H2][CX4H2]            | 0.9091 |
| CCCCC                             | 0.1427 | [OX1H0]=[CX3H0]([#8])[CX4H2]       | 0.9249 |
| [CX4H2]([CX4H2])[CX4H0]           | 0.1401 | OCC[CH2]                           | 0.9647 |
| [#8][#6][#6][#6][#6]=[#8]         | 0.131  | [CX3H0](=[OX1H0])([OX2H1])[CX4H2]  | 0.9675 |

---

Example 71 true smiles: CCC(C(=O)O)C(=O)O formula: C5H8O4  
 Index of correct structure: 0 of 3240  
 True structure loss: 0.022372  
 True structure:

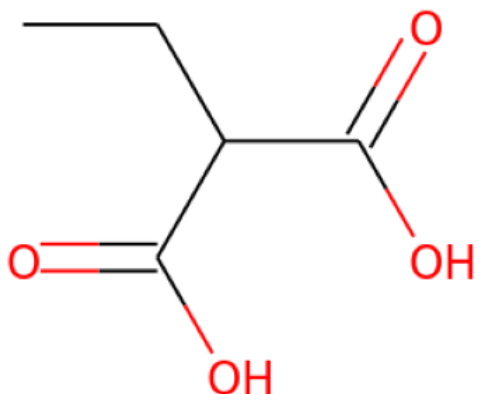

Experimental <sup>13</sup>C NMR (solvent: CDCl<sub>3</sub>, DMSO-d<sub>6</sub>)

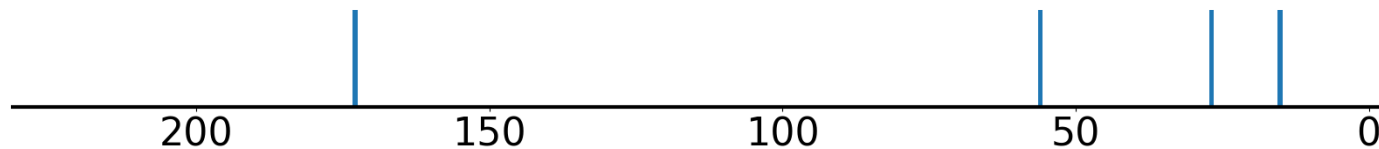

Experimental <sup>1</sup>H NMR (solvent: D<sub>2</sub>O)

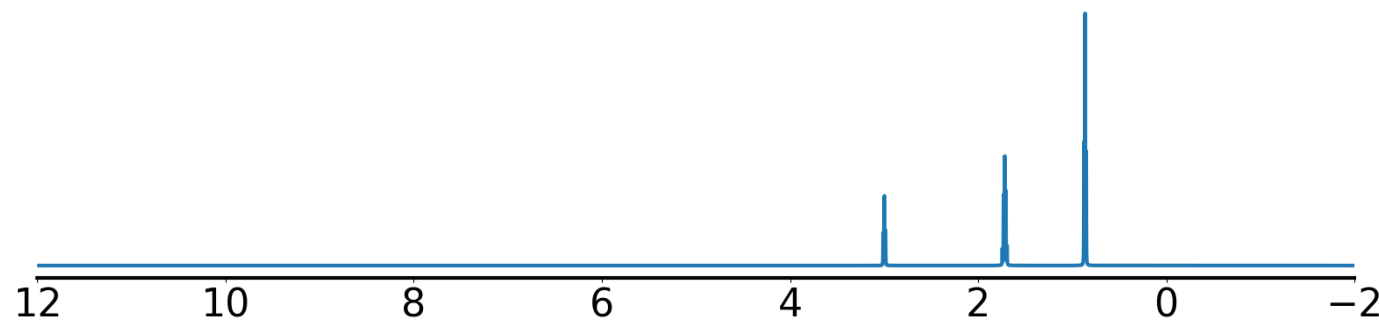

Top predicted structures (loss):

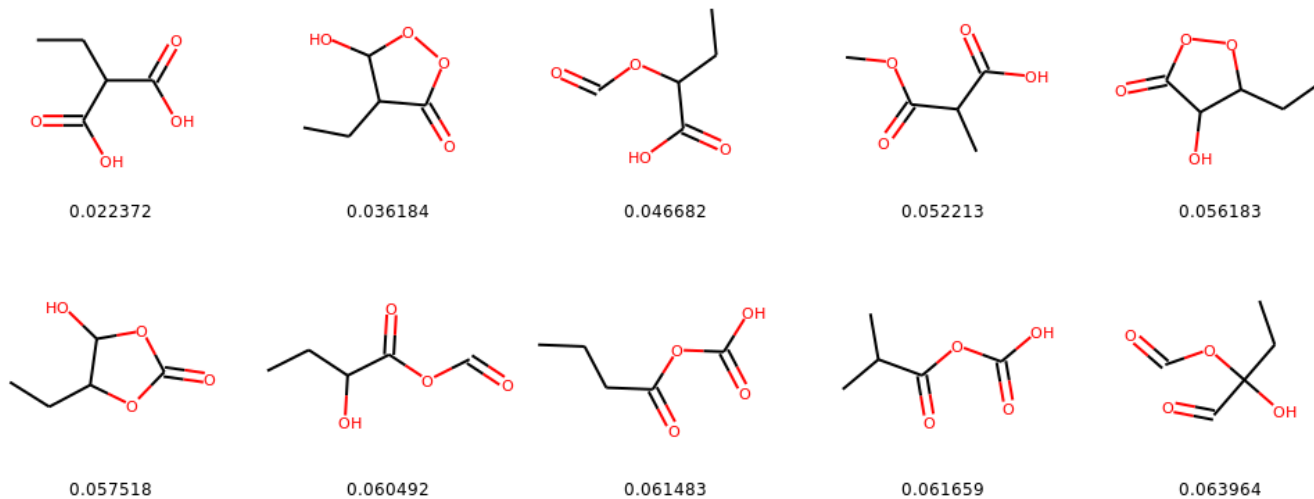



|                             |        |                                    |        |
|-----------------------------|--------|------------------------------------|--------|
| Top predicted substructures | prob   |                                    |        |
| [#8]=[#6][#8]               | 0.9992 | [CX4H2]([#6])[#6]                  | 0.9796 |
| [CX3](=[OX1])O              | 0.999  | [OX2H1]                            | 0.968  |
| [CX3](=[OX1])C              | 0.9974 | [CX4H3][CX4H2]                     | 0.9487 |
| [CX4H3]                     | 0.9969 | OCC[CH2]                           | 0.9179 |
| [#6H3][#6][#6]              | 0.991  | [CX4H3][#6]                        | 0.8938 |
| best positives              | prob   | best negatives                     | prob   |
| [#8]=[#6][#8]               | 0.9992 | [CX2H1]#[CX2H0][CX3H1]=[CX3H0]     | 0.0    |
| [CX3](=[OX1])O              | 0.999  | CCC=CC#C                           | 0.0    |
| [CX3](=[OX1])C              | 0.9974 | CC=CC#CC                           | 0.0    |
| [CX4H3]                     | 0.9969 | [#6X3H2]=[#6][#6H2][#8H]           | 0.0    |
| [#6H3][#6][#6]              | 0.991  | [#7][#6]=[#6][#6][#6]=[#7]         | 0.0    |
| [CX4H2]([#6])[#6]           | 0.9796 | [#7][#6][#6]=[#6][#6][#7]          | 0.0    |
| [OX2H1]                     | 0.968  | CCC#CC=C                           | 0.0    |
| [CX4H3][CX4H2]              | 0.9487 | CC=CCC#C                           | 0.0    |
| OCC[CH2]                    | 0.9179 | CC#CCC=C                           | 0.0    |
| [CX4H3][#6]                 | 0.8938 | [#6X3H1]=[#6X3H1][#6X3H0]=[#6X3H1] | 0.0    |
| worst negatives             | prob   | worst positives                    | prob   |
| [#8][#6][#6H2]              | 0.6206 | O=[#6][#6][#6X3]                   | 0.0208 |
| [#8][#6][#6]=[#8]           | 0.5807 | [CX4H1]([CX4H2])([CX3H0])[CX3H0]   | 0.0307 |
| [CX4H](O)CO                 | 0.547  | O=[#6][#6H][#6H0]                  | 0.345  |
| [#8][#6][#6][#8]            | 0.5149 | [#6X3][#6][#6][#6H3]               | 0.4315 |
| [#6H1][#6H1]                | 0.4777 | [#8][#6][#6][#6X3]                 | 0.4636 |
| [CX4H]O                     | 0.4307 | [CX3H0](=[OX1H0])([OX2H1])[CX4H1]  | 0.5555 |
| [#6H2][#6H1r3]              | 0.217  | [#6H1][#6H2]                       | 0.6022 |
| [#8][#6H1][#6H1]            | 0.2032 | O=[CX3][CX4H]                      | 0.6614 |
| O[CX4H][CX4H2]              | 0.1817 | [CX4H2]CC=O                        | 0.6936 |
| O[CX4H]([CX4H2])[CX4H1]     | 0.1784 | [#8]=[#6H0][#6H1]                  | 0.7015 |

---

Example 72 true smiles: COC(=O)CC(=O)OC formula: C5H8O4  
 Index of correct structure: 0 of 3240  
 True structure loss: 0.014072  
 True structure:

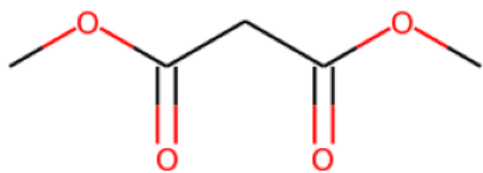

Experimental <sup>13</sup>C NMR (solvent: CDCl<sub>3</sub>)

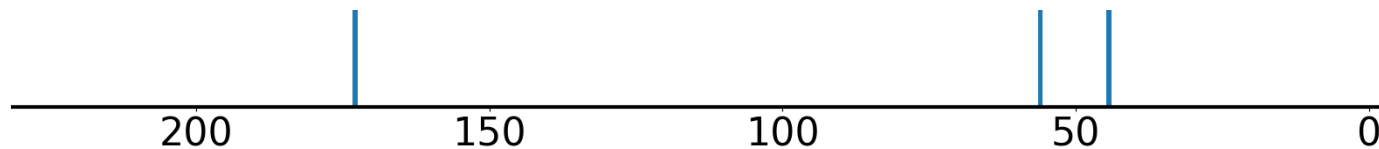

Experimental <sup>1</sup>H NMR (solvent: CDCl<sub>3</sub>)

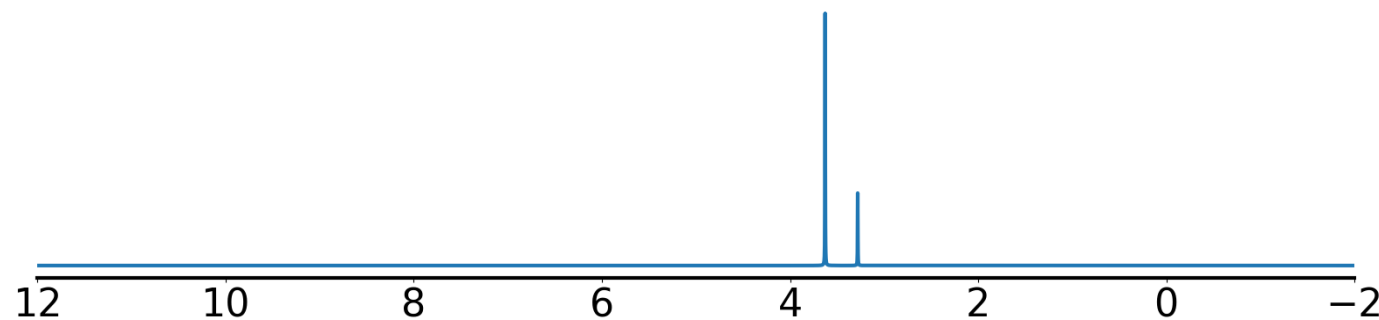

Top predicted structures (loss):

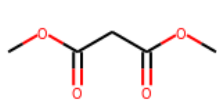

0.014072

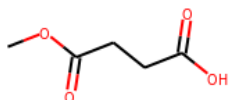

0.037693

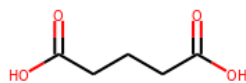

0.040552

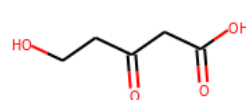

0.056913

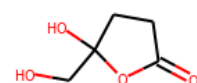

0.065685

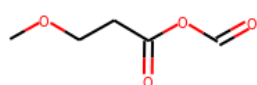

0.067063

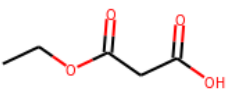

0.068575

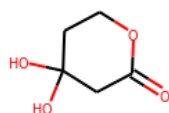

0.069116

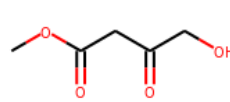

0.070151

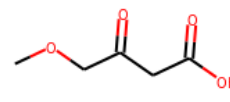

0.070197

|                                   |        |                                   |        |
|-----------------------------------|--------|-----------------------------------|--------|
| Top predicted substructures       | prob   |                                   |        |
| [#8]=[#6][#8]                     | 0.9995 | [OX1H0]=[CX3H0][OX2H0][CX4H3]     | 0.9199 |
| [CX3](=[OX1])O                    | 0.9985 | [CX4H3]                           | 0.9055 |
| [CX3](=[OX1])C                    | 0.9961 | [CX4H2][CX3]=O                    | 0.8437 |
| [OX1H0]=[CX3H0]([#8])[CX4H2]      | 0.9675 | [CX4H2]([CX3H0])[CX3H0]           | 0.7876 |
| [#8][#6][#6H2]                    | 0.9433 | [CX4H3][OX2H0]                    | 0.785  |
| best positives                    | prob   | best negatives                    | prob   |
| [#8]=[#6][#8]                     | 0.9995 | C=CC=CC#C                         | 0.0    |
| [CX3](=[OX1])O                    | 0.9985 | CC=CCC#C                          | 0.0    |
| [CX3](=[OX1])C                    | 0.9961 | CC=CC#CC                          | 0.0    |
| [OX1H0]=[CX3H0]([#8])[CX4H2]      | 0.9675 | CC#CCC#C                          | 0.0    |
| [#8][#6][#6H2]                    | 0.9433 | [CX2H1]#[CX2H0][CX3H1]=[CX3H0]    | 0.0    |
| [OX1H0]=[CX3H0][OX2H0][CX4H3]     | 0.9199 | [CX2H0](#[CX2H0])[CX2H0]          | 0.0    |
| [CX4H3]                           | 0.9055 | [#7][#6]=[#6][#6][#6]=[#7]        | 0.0    |
| [CX4H2][CX3]=O                    | 0.8437 | [CX3H0](=[CX3H1])([OX2H0])[CX2H0] | 0.0    |
| [CX4H2]([CX3H0])[CX3H0]           | 0.7876 | [CX3H0](=[CX3H1])([CX4H1])[CX2H0] | 0.0    |
| [CX4H3][OX2H0]                    | 0.785  | [CX3H1](=[CX3H2])[CX2H0]          | 0.0    |
| worst negatives                   | prob   | worst positives                   | prob   |
| [CX3](=O)[OX2H1]                  | 0.5757 | O=[#6][#6][#6X3]                  | 0.2881 |
| [CX3H0](=[OX1H0])([OX2H1])[CX4H2] | 0.5191 | [OX1H0]=[CX3H0][CX4H2][CX3H0]     | 0.6372 |
| [OX2H1]                           | 0.5179 | [#6X3][#6H2][#6X3]                | 0.6722 |
| OCC[CH2]                          | 0.4732 | [#8][#6][#6][#6X3]                | 0.6724 |
| [CX4H2]CC=O                       | 0.3523 | [#8X1]=[#6X3][#6H2][#6H0]         | 0.6963 |
| O=[CX3][CX4H]                     | 0.2395 | [CX4H2]([#6])[#6]                 | 0.7071 |
| [#8]=[#6H0][#6H1]                 | 0.2368 | [OX2H0][CX3H0][CX4H2]             | 0.7075 |
| [#6H1][#6H2]                      | 0.2221 | [CX3H0](=[OX1H0])([OX2H0])[CX4H2] | 0.7429 |
| [#8][#6][#6][#8]                  | 0.208  | [CX4H3][OX2H0]                    | 0.785  |
| [#6H1]                            | 0.199  | [CX4H2]([CX3H0])[CX3H0]           | 0.7876 |

---

Example 73 true smiles: COC1CCC(OC)O1 formula: C6H12O3  
Index of correct structure: 0 of 3020  
True structure loss: 0.009313  
True structure:

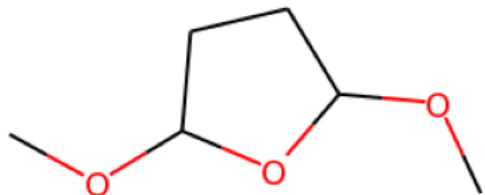

Experimental <sup>13</sup>C NMR (solvent: CDCl<sub>3</sub>)

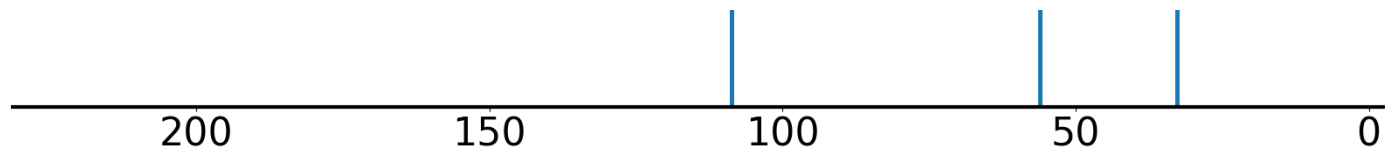

Experimental <sup>1</sup>H NMR (solvent: CDCl<sub>3</sub>)

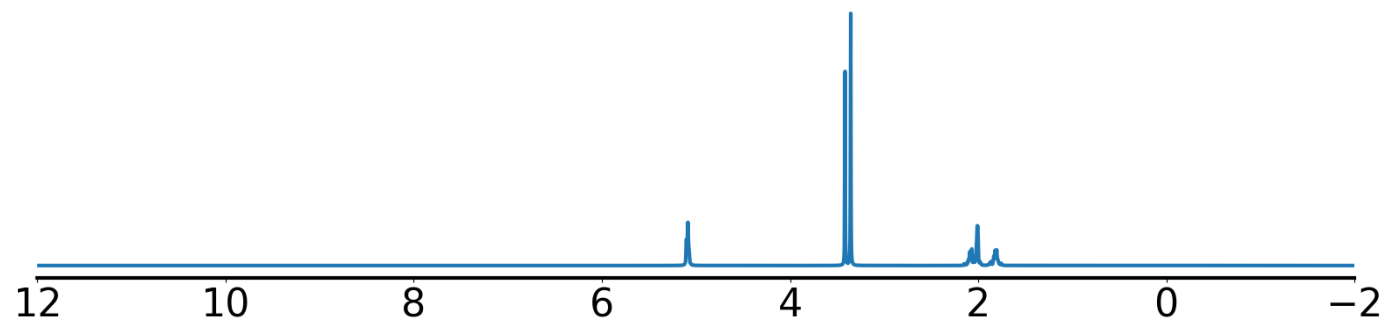

Top predicted structures (loss):

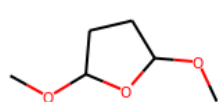

0.009313

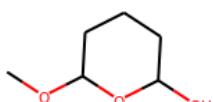

0.021802

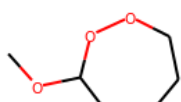

0.041438

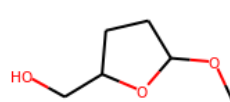

0.04503

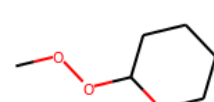

0.052808

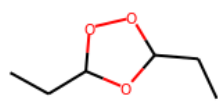

0.056076

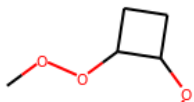

0.057516

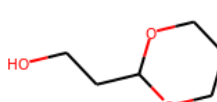

0.058041

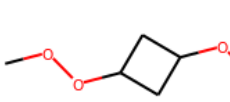

0.05979

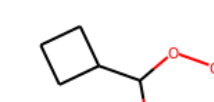

0.061794

|                                  |        |                                   |        |
|----------------------------------|--------|-----------------------------------|--------|
| Top predicted substructures      | prob   |                                   |        |
| [OX2H0][CX4H1][OX2H0]            | 1.0    | [CX4H1]([OX2H0])([OX2H0])[CX4H2]  | 0.9881 |
| [CX4H3]                          | 0.9973 | OCC[CH2]                          | 0.9771 |
| [CX4H2]([#6])[#6]                | 0.9969 | [#8][#6][#6H2]                    | 0.9757 |
| [CX4H]O                          | 0.9959 | [CX4H3][OX2H0]                    | 0.9754 |
| [#6H1]                           | 0.9938 | [#6H1][#6H2]                      | 0.9412 |
| best positives                   | prob   | best negatives                    | prob   |
| [OX2H0][CX4H1][OX2H0]            | 1.0    | [CX2H0](#[CX2H1])[cX3H0]          | 0.0    |
| [CX4H3]                          | 0.9973 | [CX2H1]#[CX2H0][CX3H1]=[CX3H0]    | 0.0    |
| [CX4H2]([#6])[#6]                | 0.9969 | C=CC=CC#C                         | 0.0    |
| [CX4H]O                          | 0.9959 | CC=CCC#C                          | 0.0    |
| [#6H1]                           | 0.9938 | [OX1H0]=[CX3H0][CX2H0]#[CX2H1]    | 0.0    |
| [CX4H1]([OX2H0])([OX2H0])[CX4H2] | 0.9881 | [CX3H0](=[CX3H1])([CX4H1])[CX2H0] | 0.0    |
| OCC[CH2]                         | 0.9771 | [#6H3][#6H1][#6H1]=[#7]           | 0.0    |
| [#8][#6][#6H2]                   | 0.9757 | [#6H2]=[#6][#6X2]                 | 0.0    |
| [CX4H3][OX2H0]                   | 0.9754 | [CX2H0](#[CX2H1])[CX4H0]          | 0.0    |
| [#6H1][#6H2]                     | 0.9412 | [CX2H0](#[NX1H0])[CX3H1]          | 0.0    |
| worst negatives                  | prob   | worst positives                   | prob   |
| [#8][#6H1][#6H1]                 | 0.3907 | C1OCCC1                           | 0.3183 |
| [CX4H2]([CH])[CH]                | 0.3743 | [CX4H1][CX4H2][CX4H2][CX4H1]      | 0.3884 |
| [#8][#6][#6][#8]                 | 0.3585 | [#6H1][#6H2][#6H2][#6H1]          | 0.5084 |
| [#6H1][#6H1]                     | 0.2965 | [#8][#6][#6][#6][#6][#8]          | 0.5436 |
| [CX4H2]([CX4H1])[CX4H1]          | 0.2902 | [#6H][#8][#6H]                    | 0.593  |
| [CX4H](O)CO                      | 0.2698 | [OX2H0][CX4H1][CX4H2][CX4H2]      | 0.7509 |
| [CX4H2]([CX4H2])[CX4H2]          | 0.1569 | [CX4H2]([CX4H2])[CX4H1]           | 0.785  |
| [#6H1]([#6H2])[#6H2]             | 0.1488 | [CX4H2][CX4H2]                    | 0.7876 |
| [OX2H1]                          | 0.1441 | O[CX4H][CX4H2]                    | 0.9053 |
| [OH][CX4H]                       | 0.1313 | [#6H1][#6H2]                      | 0.9412 |

---

Example 74 true smiles: COC(CC(C)=O)OC formula: C6H12O3  
 Index of correct structure: 0 of 3020  
 True structure loss: 0.009806  
 True structure:

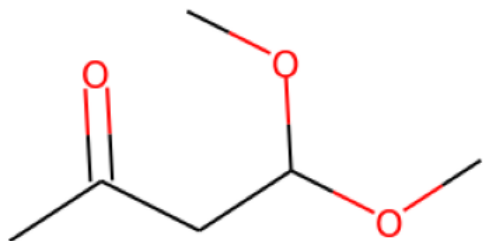

Experimental <sup>13</sup>C NMR (solvent: CDCl<sub>3</sub>)

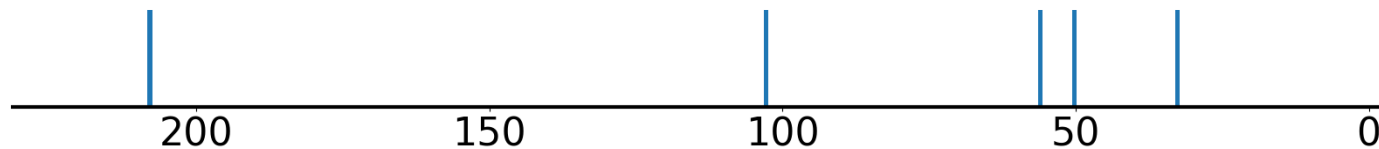

Experimental <sup>1</sup>H NMR (solvent: CDCl<sub>3</sub>)

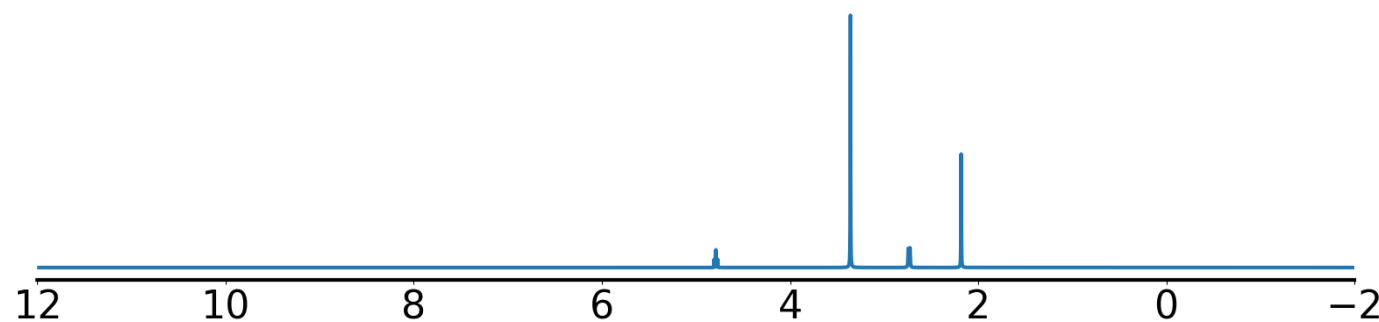

Top predicted structures (loss):

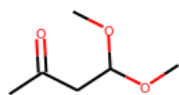

0.009806

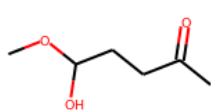

0.048452

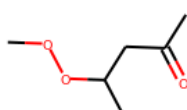

0.050987

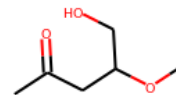

0.06019

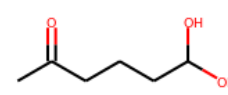

0.06186

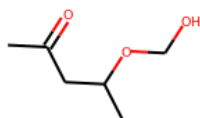

0.062557

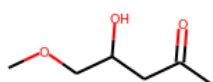

0.065114

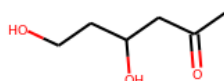

0.068028

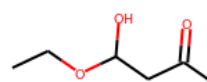

0.069773

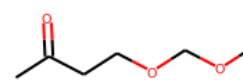

0.071497

|                                   |        |                                   |        |
|-----------------------------------|--------|-----------------------------------|--------|
| Top predicted substructures       | prob   |                                   |        |
| [CX4H3]                           | 1.0    | [CX4H3][#6]                       | 0.9871 |
| [CX3](=[OX1])C                    | 0.9997 | [OX1H0]=[CX3H0][CX4H3]            | 0.9862 |
| [CX4H3][CX3]                      | 0.9993 | [CX3H0](=[OX1H0])([CX4H3])[CX4H2] | 0.9781 |
| [CX4H3][OX2H0]                    | 0.9978 | [#6H3][#6H0]                      | 0.9743 |
| [CX4H3][CX3H0]                    | 0.9976 | [CX4H2]([#6])[#6]                 | 0.9631 |
| best positives                    | prob   | best negatives                    | prob   |
| [CX4H3]                           | 1.0    | CCC#CC#C                          | 0.0    |
| [CX3](=[OX1])C                    | 0.9997 | [CX2H0](#[CX2H0])[CX2H0]          | 0.0    |
| [CX4H3][CX3]                      | 0.9993 | [CX2H0](#[CX2H1])[CX3H0]          | 0.0    |
| [CX4H3][OX2H0]                    | 0.9978 | [CX2H0](#[CX2H1])[CX2H0]          | 0.0    |
| [CX4H3][CX3H0]                    | 0.9976 | [#6X2][#6H1][#6X2]                | 0.0    |
| [CX4H3][#6]                       | 0.9871 | [CX3H0](=[CX3H1])([CX4H1])[CX2H0] | 0.0    |
| [OX1H0]=[CX3H0][CX4H3]            | 0.9862 | C=CC=CC#C                         | 0.0    |
| [CX3H0](=[OX1H0])([CX4H3])[CX4H2] | 0.9781 | CC#CCC#C                          | 0.0    |
| [#6H3][#6H0]                      | 0.9743 | CC=CC#CC                          | 0.0    |
| [CX4H2]([#6])[#6]                 | 0.9631 | CC=CCC#C                          | 0.0    |
| worst negatives                   | prob   | worst positives                   | prob   |
| OCC[CH2]                          | 0.5148 | [#8][#6][#6][#6X3]                | 0.3459 |
| [#8][#6][#6][#6][#6]=[#8]         | 0.3456 | [CX4H2]( [CX4H1] ) [CX3H0]        | 0.5104 |
| [CX4H3][OX2H0][CX4H2]             | 0.2748 | [#8]=[#6][#6H2][#6H1]             | 0.5135 |
| [#6H2][#8][#6H1]                  | 0.254  | O=[CX3H0][CX4H2][CX4H1]           | 0.7588 |
| [CX4H2]([#6])[O]                  | 0.2386 | [CX4H]O                           | 0.7665 |
| [CX3H1](=[OX1H0])[CX4H2]          | 0.2345 | [OX1H0]=[CX3H0]([#6])[CX4H2]      | 0.8124 |
| [#6X3][#6][#6][#6H3]              | 0.2013 | [#6H1]                            | 0.8274 |
| [CX4H2](O)[CHX4]                  | 0.2009 | [#6H1][#6H2]                      | 0.846  |
| [CX4H2]CC=O                       | 0.1827 | O[CX4H][CX4H2]                    | 0.8753 |
| [CX4H2][CX3H]                     | 0.1803 | [#6H3][#6X3H0][#6H2]              | 0.8755 |

---

Example 75 true smiles: CCOC(=O)CC(C)O formula: C6H12O3  
Index of correct structure: 0 of 3020  
True structure loss: 0.031697  
True structure:

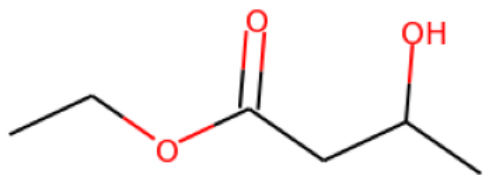

Experimental <sup>13</sup>C NMR (solvent: CDCl<sub>3</sub>)

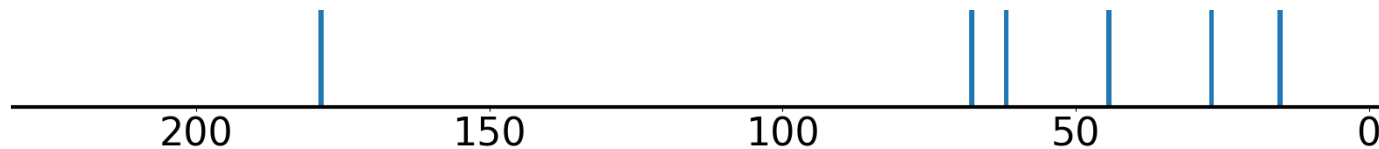

Experimental <sup>1</sup>H NMR (solvent: CDCl<sub>3</sub>)

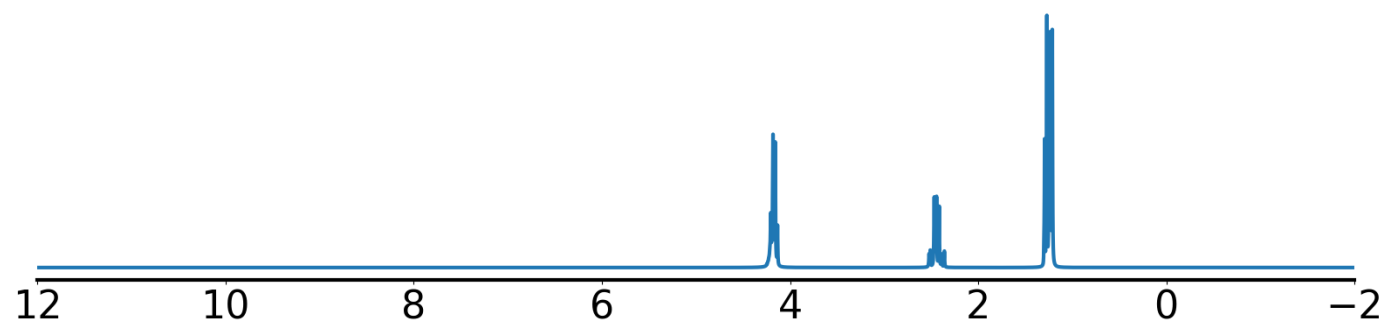

Top predicted structures (loss):

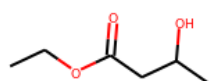

0.031697

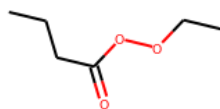

0.039367

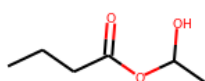

0.043515

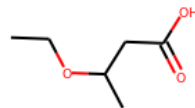

0.046002

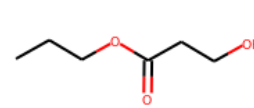

0.048921

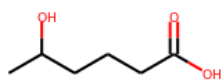

0.049044

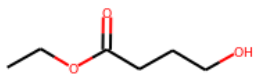

0.04967

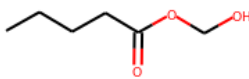

0.050377

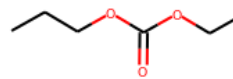

0.051692

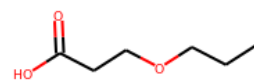

0.052115



| Top predicted substructures       | prob   |                                   |        |
|-----------------------------------|--------|-----------------------------------|--------|
| [CX4H3]                           | 1.0    | [#6H3][#6][#6]                    | 0.9953 |
| [CX3](=[OX1])C                    | 0.9986 | [CX4H3][CX4]O                     | 0.9908 |
| [#8]=[#6][#8]                     | 0.9984 | [OX2H1]                           | 0.9903 |
| [CX4H3][#6]                       | 0.9979 | [CX4H2]([#6])[O]                  | 0.9799 |
| [CX3](=[OX1])O                    | 0.9971 | [CX4H2]([#6])[#6]                 | 0.9706 |
| best positives                    | prob   | best negatives                    | prob   |
| [CX4H3]                           | 1.0    | C=CC=CC#C                         | 0.0    |
| [CX3](=[OX1])C                    | 0.9986 | [CX2H0](#[CX2H1])[CX3H0]          | 0.0    |
| [#8]=[#6][#8]                     | 0.9984 | [CX3H0](=[CX3H1])([OX2H0])[CX2H0] | 0.0    |
| [CX4H3][#6]                       | 0.9979 | [CX2H0](#[CX2H1])[CX4H0]          | 0.0    |
| [CX3](=[OX1])O                    | 0.9971 | [#6X2][#6H1][#6X2]                | 0.0    |
| [#6H3][#6][#6]                    | 0.9953 | CC#CCC#C                          | 0.0    |
| [CX4H3][CX4]O                     | 0.9908 | CCC#CC#C                          | 0.0    |
| [OX2H1]                           | 0.9903 | [CX2H0](#[CX2H0])[CX2H0]          | 0.0    |
| [CX4H2]([#6])[O]                  | 0.9799 | [#7][#6H1][#6X2]                  | 0.0    |
| [CX4H2]([#6])[#6]                 | 0.9706 | [CX2H1]#[CX2H0][CX3H1]=[CX3H0]    | 0.0    |
| worst negatives                   | prob   | worst positives                   | prob   |
| [CX3](=O)[OX2H1]                  | 0.9255 | O[CX4H][CX4H2]                    | 0.1878 |
| OCC[CH2]                          | 0.7836 | [#6X4H2][#6H1][#8H]               | 0.2528 |
| [#8][#6H0][#6H1]                  | 0.6518 | [OH][CX4H]                        | 0.2538 |
| [CX4H2]CC=O                       | 0.634  | [CX4H]O                           | 0.2555 |
| [CX3H0](=[OX1H0])([OX2H1])[CX4H2] | 0.5426 | [#8]=[#6][#6H2][#6H1]             | 0.2812 |
| [CX3H0](=[OX1H0])([OX2H1])[CX4H1] | 0.38   | O=[CX3H0][CX4H2][CX4H1]           | 0.3086 |
| [#8][#6][#6][#6][#6][#8]          | 0.3667 | [#6X3][#6][#6][#6H3]              | 0.3252 |
| [#8][#6][#6][#6][#6]=[#8]         | 0.3665 | [#8X2H0][#6X3H0][CX4H2][CX4H1]    | 0.3313 |
| [#8H][#6H2][#6H1]                 | 0.2805 | [CHX4]([CH3X4])[CH2X4]            | 0.3742 |
| [#8]=[#6H0][#6H1]                 | 0.2401 | [#6X4H3][#6][#8H]                 | 0.4506 |

---

Example 76 true smiles: COC(=O)C(C)(C)CO formula: C6H12O3  
 Index of correct structure: 0 of 3020  
 True structure loss: 0.026019  
 True structure:

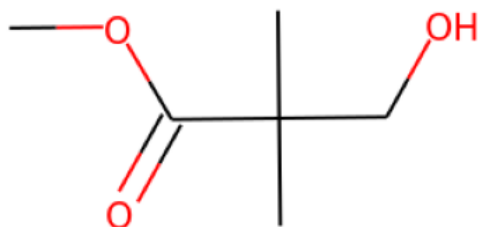

Experimental <sup>13</sup>C NMR (solvent: CDCl<sub>3</sub>)

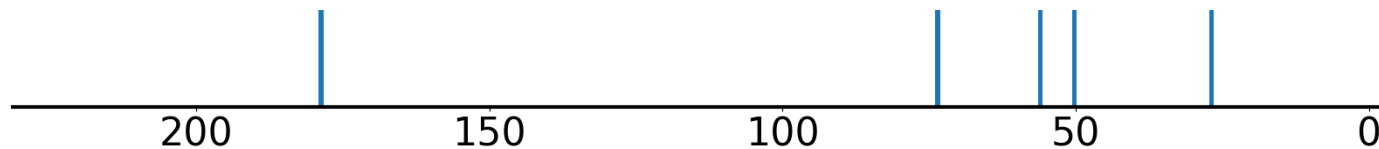

Experimental <sup>1</sup>H NMR (solvent: CDCl<sub>3</sub>)

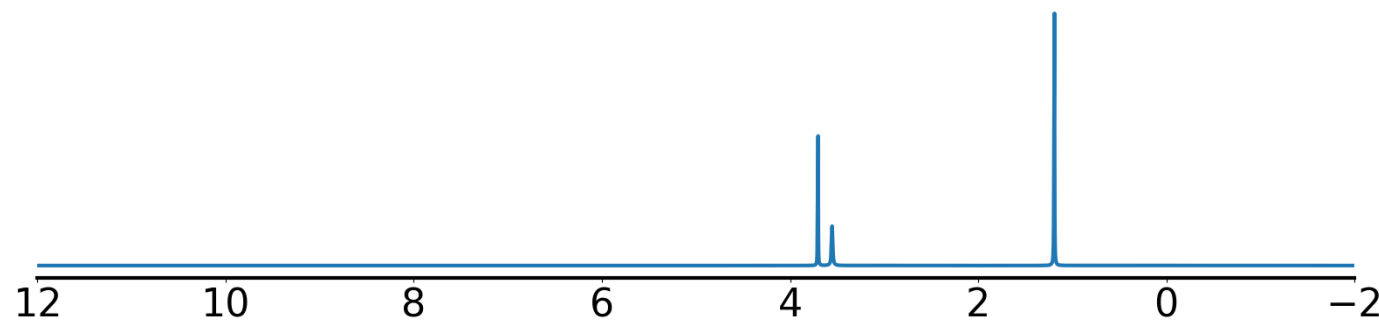

Top predicted structures (loss):

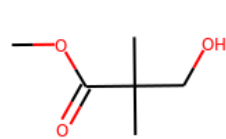

0.026019

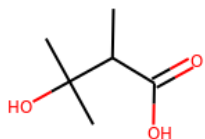

0.03807

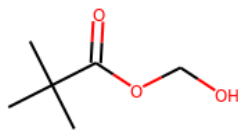

0.040402

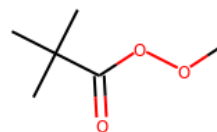

0.041319

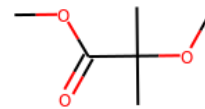

0.041943

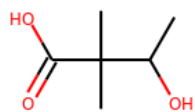

0.043469

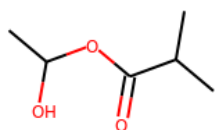

0.049183

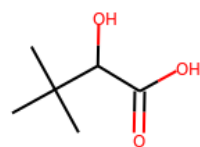

0.049239

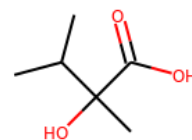

0.050928

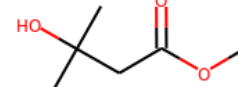

0.052917

|                                   |        |                                   |        |
|-----------------------------------|--------|-----------------------------------|--------|
| Top predicted substructures       | prob   |                                   |        |
| [CX4H3]                           | 1.0    | [CX3](=[OX1])O                    | 0.9853 |
| [#6H3][#6][#6]                    | 1.0    | [OX1H0]=[CX3H0][OX2H0][CX4H3]     | 0.9576 |
| [CX4H3][#6]                       | 0.9996 | [CX4H3][CX4H0][CX4H3]             | 0.9297 |
| [#8]=[#6][#8]                     | 0.9969 | [#6H1]                            | 0.9187 |
| [CX3](=[OX1])C                    | 0.9969 | [OX2H1]                           | 0.9066 |
| best positives                    | prob   | best negatives                    | prob   |
| [CX4H3]                           | 1.0    | C=CC=CC#C                         | 0.0    |
| [#6H3][#6][#6]                    | 1.0    | CCC#CC#C                          | 0.0    |
| [CX4H3][#6]                       | 0.9996 | [CX3H0](=[CX3H1])([CX4H2])[CX2H0] | 0.0    |
| [#8]=[#6][#8]                     | 0.9969 | CC=CC#CC                          | 0.0    |
| [CX3](=[OX1])C                    | 0.9969 | [CX3H0](=[CX3H1])([OX2H0])[CX2H0] | 0.0    |
| [CX3](=[OX1])O                    | 0.9853 | [CX2H1]#[CX2H0][CX3H1]=[CX3H0]    | 0.0    |
| [OX1H0]=[CX3H0][OX2H0][CX4H3]     | 0.9576 | [#7][#6][#6][#6][#7]              | 0.0    |
| [CX4H3][CX4H0][CX4H3]             | 0.9297 | [#7][#6]=[#6][#6][#7]             | 0.0    |
| [OX2H1]                           | 0.9066 | CC#CCC#C                          | 0.0    |
| [#6H3][#6H0]                      | 0.9008 | CC=CCC#C                          | 0.0    |
| worst negatives                   | prob   | worst positives                   | prob   |
| [#6H1]                            | 0.9187 | [CX4H2]([#6])[O]                  | 0.2454 |
| [CX3](=O)[OX2H1]                  | 0.6856 | [CX4H2]CC=O                       | 0.3517 |
| O=[CX3][CX4H]                     | 0.6163 | [#6H3][#6][#6X3]                  | 0.3788 |
| [CH3][#6][#8]                     | 0.5652 | OCC[CH2]                          | 0.3985 |
| [#8]=[#6H0][#6H1]                 | 0.5512 | [CX4H2]([OX2H1])[CX4H0]           | 0.408  |
| [OH][CX4H]                        | 0.5503 | [CX3H0](=[OX1H0])([OX2H0])[CX4H0] | 0.4116 |
| [#8][#6H0][#6H1]                  | 0.5489 | [OX1H0]=[CX3H0][CX4H0][CX4H3]     | 0.5749 |
| [#6X4H3][#6][#8H]                 | 0.52   | [CH3]CC[OH]                       | 0.6069 |
| [CX4H3][CX4]O                     | 0.4838 | [CX4H3][CX4H0]                    | 0.8012 |
| [CX3H0](=[OX1H0])([OX2H1])[CX4H1] | 0.4567 | [CX4H3][OX2H0]                    | 0.8014 |

---

Example 77 true smiles: CCCC(O)C(=O)O formula: C6H12O3  
 Index of correct structure: 0 of 3020  
 True structure loss: 0.014868  
 True structure:

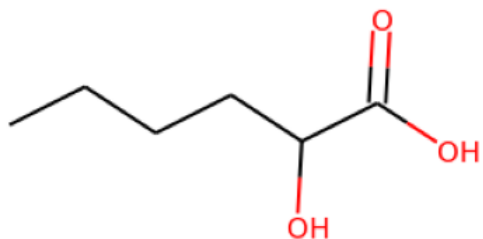

Experimental <sup>13</sup>C NMR (solvent: CDCl<sub>3</sub>)

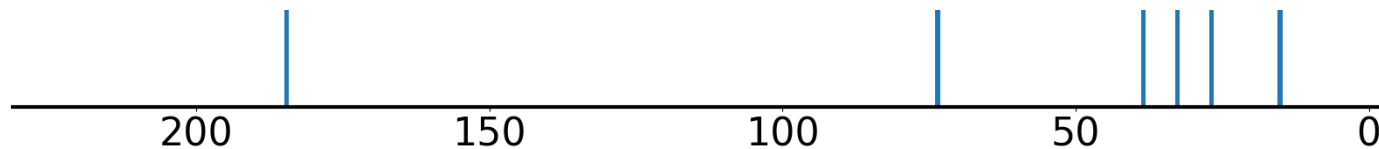

Experimental <sup>1</sup>H NMR (solvent: D<sub>2</sub>O)

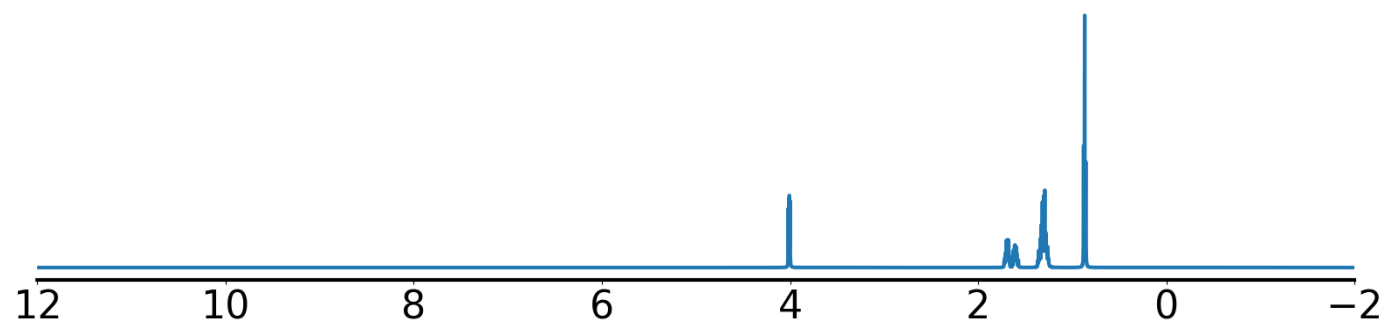

Top predicted structures (loss):

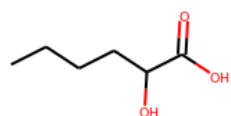

0.014868

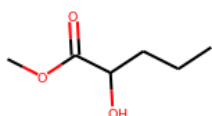

0.043137

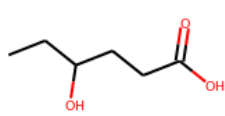

0.049736

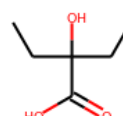

0.051526

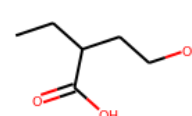

0.051833

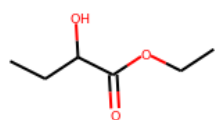

0.053758

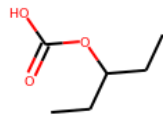

0.054139

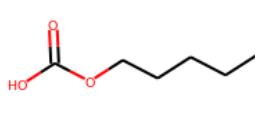

0.054479

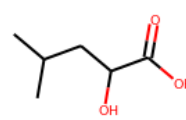

0.054607

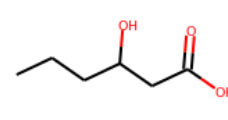

0.057478

| Top predicted substructures | prob   |                                   |        |
|-----------------------------|--------|-----------------------------------|--------|
| [CX4H2]([#6])[#6]           | 0.9999 | [#8]=[#6][#8]                     | 0.9969 |
| [#6H3][#6][#6]              | 0.9999 | [CX4H3][#6]                       | 0.9969 |
| [CX4H3]                     | 0.9987 | [CX4H3][CX4H2]                    | 0.9953 |
| [CX3](=[OX1])C              | 0.9984 | OCC[CH2]                          | 0.9889 |
| [OX2H1]                     | 0.9982 | [CX3](=[OX1])O                    | 0.9876 |
| best positives              | prob   | best negatives                    | prob   |
| [CX4H2]([#6])[#6]           | 0.9999 | C=CC=CC#C                         | 0.0    |
| [#6H3][#6][#6]              | 0.9999 | CCC=CC#C                          | 0.0    |
| [CX4H3]                     | 0.9987 | [CX2H1]#[CX2H0][CX3H1]=[CX3H0]    | 0.0    |
| [CX3](=[OX1])C              | 0.9984 | [CX2H0](#[CX2H1])[CX3H1]          | 0.0    |
| [OX2H1]                     | 0.9982 | [CX2H0](#[CX2H1])[CX3H0]          | 0.0    |
| [#8]=[#6][#8]               | 0.9969 | [CX3H0](=[CX3H1])([OX2H0])[CX2H0] | 0.0    |
| [CX4H3][#6]                 | 0.9969 | [CX2H0](#[CX2H1])[CX4H0]          | 0.0    |
| [CX4H3][CX4H2]              | 0.9953 | CC=CC#CC                          | 0.0    |
| OCC[CH2]                    | 0.9889 | [#6X2][#6H1][#6X2]                | 0.0    |
| [CX3](=[OX1])O              | 0.9876 | [CX2H0](#[CX2H0])[CX2H0]          | 0.0    |
| worst negatives             | prob   | worst positives                   | prob   |
| [CX4H2]([CX4H3])[CX4H1]     | 0.4451 | [#8][#6][#6][#8]                  | 0.2349 |
| [CH3]CC[OH]                 | 0.4013 | [CX4H](O)CO                       | 0.2531 |
| [CX4H2]([#6])[O]            | 0.3404 | CCCCC                             | 0.3469 |
| [#6X3][#6][#6][#6H3]        | 0.2414 | [CX4H]O                           | 0.5352 |
| [#8]=[#6][#6H1][#6H1]       | 0.2159 | [#8][#6H0][#6H1]                  | 0.5735 |
| [#8][#6][#6][#6][#6][#8]    | 0.1468 | [CX4H2]([CX4H2])[CX4H2]           | 0.5994 |
| [#8][#6H1][#6H1]            | 0.1437 | [#8]=[#6H0][#6H1]                 | 0.6093 |
| [#8][#6][#6][#6X3]          | 0.1303 | [CX4H2]([CX4H2])[CX4H1]           | 0.6379 |
| [CH2X4](O)[CX4H2]           | 0.1208 | [CX3H0](=[OX1H0])([OX2H1])[CX4H1] | 0.6563 |
| [#6H1]([#6H2])[#6H2]        | 0.1111 | O=[CX3][CX4H]                     | 0.6845 |

---

Example 78 true smiles: CC(C)CC(O)C(=O)O formula: C6H12O3  
Index of correct structure: 0 of 3020  
True structure loss: 0.01545  
True structure:

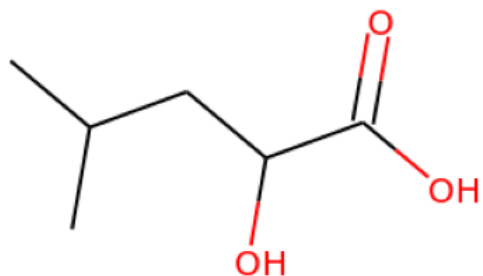

Experimental <sup>13</sup>C NMR (solvent: CDCl<sub>3</sub>)

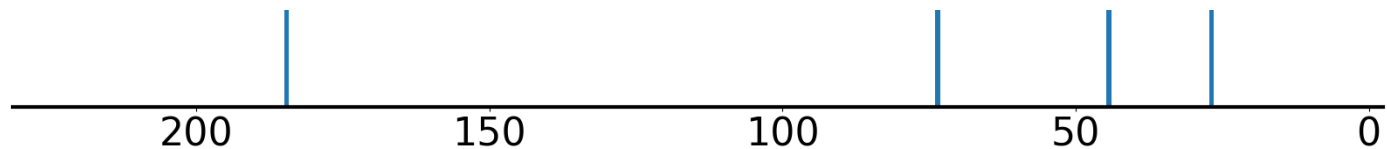

Experimental <sup>1</sup>H NMR (solvent: D<sub>2</sub>O)

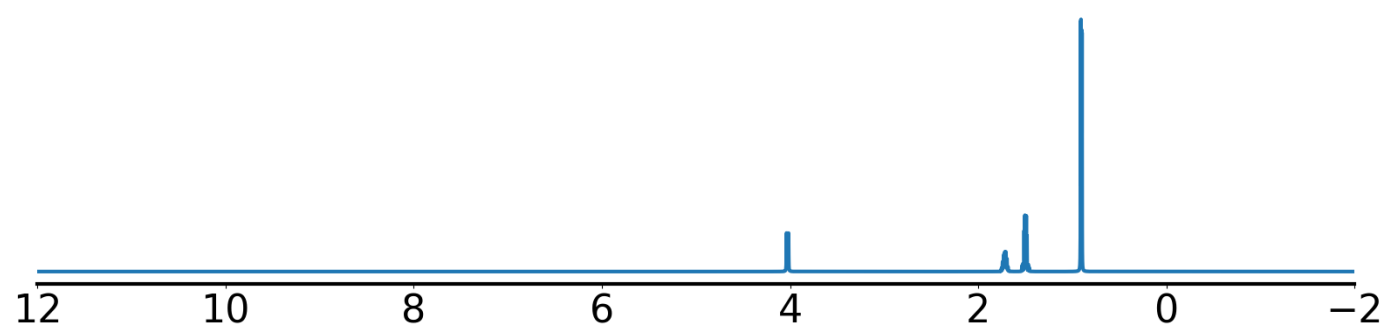

Top predicted structures (loss):

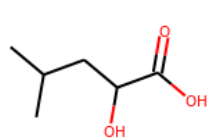

0.01545

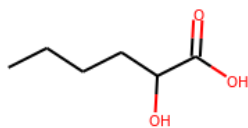

0.04494

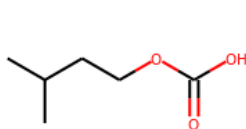

0.051578

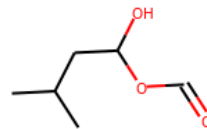

0.059144

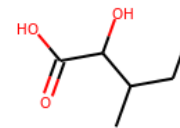

0.06263

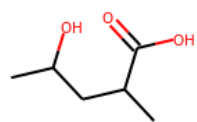

0.064006

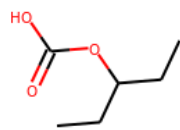

0.064863

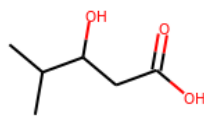

0.066002

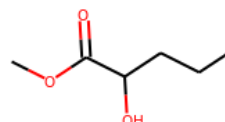

0.066504

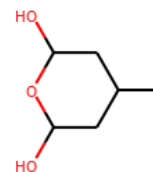

0.06662

|                                        |        |                                        |        |
|----------------------------------------|--------|----------------------------------------|--------|
| Top predicted substructures            | prob   |                                        |        |
| [#6H3][#6][#6]                         | 1.0    | [CX4H3][#6]                            | 0.9942 |
| [CX4H3]                                | 0.9995 | [CX3](=O)[OX2H1]                       | 0.9895 |
| [#6H1]                                 | 0.9985 | [#8]=[#6][#8]                          | 0.989  |
| [OX2H1]                                | 0.998  | [CX4H2]([#6])[#6]                      | 0.9887 |
| [CX3](=[OX1])C                         | 0.998  | [CX3](=[OX1])O                         | 0.9694 |
| best positives                         | prob   | best negatives                         | prob   |
| [#6H3][#6][#6]                         | 1.0    | [CX3H0](=[CX3H1])([OX2H0])[CX2H0]      | 0.0    |
| [CX4H3]                                | 0.9995 | [CX2H1][CX2H0][CX3H1]=[CX3H0]          | 0.0    |
| [#6H1]                                 | 0.9985 | C=CC=CC#C                              | 0.0    |
| [OX2H1]                                | 0.998  | [CX2H0](#[CX2H1])[CX4H0]               | 0.0    |
| [CX3](=[OX1])C                         | 0.998  | [CX2H0](#[CX2H1])[cX3H0]               | 0.0    |
| [CX4H3][#6]                            | 0.9942 | CC#CCC#C                               | 0.0    |
| [CX3](=O)[OX2H1]                       | 0.9895 | [#6X2][#6H1][#6X2]                     | 0.0    |
| [#8]=[#6][#8]                          | 0.989  | [CX3H0](=[CX3H1])([CX4H2])[CX2H0]      | 0.0    |
| [CX4H2]([#6])[#6]                      | 0.9887 | CC#CCC=C                               | 0.0    |
| [CX3](=[OX1])O                         | 0.9694 | [#7][#6]=[#6][#6][#7]                  | 0.0    |
| worst negatives                        | prob   | worst positives                        | prob   |
| [#6X3][#6][#6][#6H3]                   | 0.4718 | [#8][#6][#6][#8]                       | 0.144  |
| [CH3]CC[OH]                            | 0.4167 | [CX4H](O)CO                            | 0.2109 |
| [#8][#6][#6][#6X3]                     | 0.3104 | [CX4H2]( [CH] ) [CH]                   | 0.5079 |
| [CX4H2][CX4H2]                         | 0.2503 | [CX3H0](=[OX1H0])([OX2H1])[CX4H1]      | 0.529  |
| [CX4H2]( [CX4H2] ) [CX4H1]             | 0.1786 | [#8][#6H0][#6H1]                       | 0.5358 |
| [CX4H1]( [OX2H1] ) ( [CX4H2] ) [CX4H2] | 0.1505 | [CX4H1]( [OX2H1] ) ( [CX4H2] ) [CX3H0] | 0.5521 |
| [#8][#6H1][#6H1]                       | 0.146  | [CX4H2]( [CX4H1] ) [CX4H1]             | 0.6033 |
| [#6H1]( [#6H2] ) [#6H2]                | 0.1447 | O[CX4H][CX4H2]                         | 0.7054 |
| [#8]=[#6][#6H1][#6H1]                  | 0.1338 | [#8H][#6X4H1][#6X3H0]                  | 0.7262 |
| CCCCC                                  | 0.1186 | [CX4H]O                                | 0.729  |

---

Example 79 true smiles: CCC(O)(CC)C(=O)O formula: C6H12O3  
 Index of correct structure: 0 of 3020  
 True structure loss: 0.008672  
 True structure:

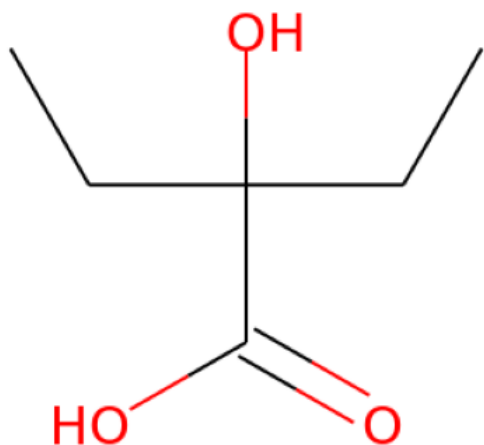

Experimental <sup>13</sup>C NMR (solvent: D2O)

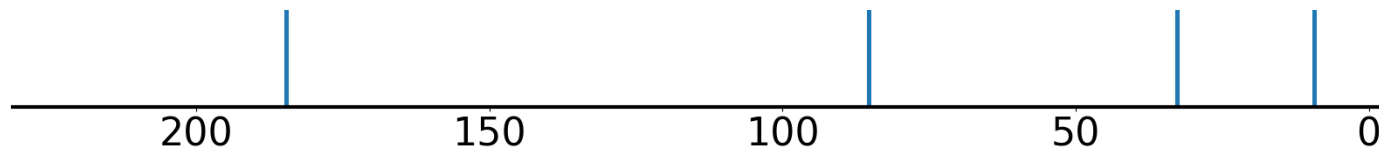

Experimental <sup>1</sup>H NMR (solvent: D2O)

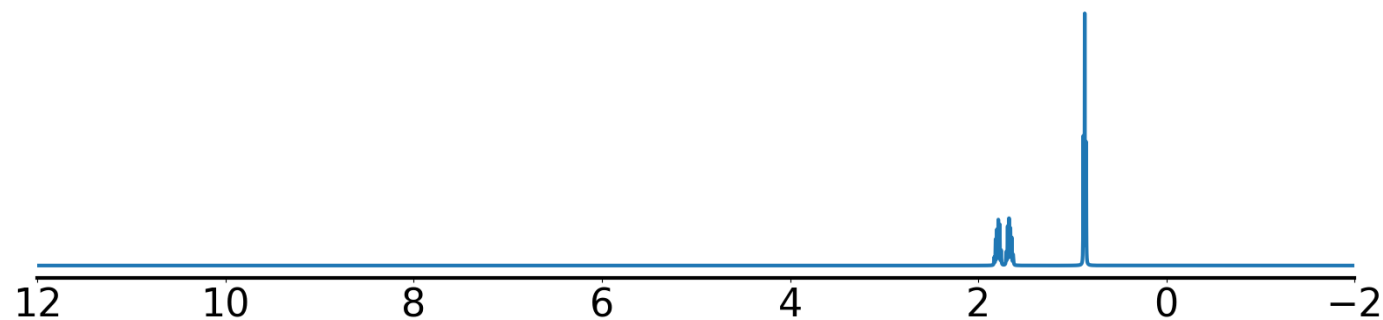

Top predicted structures (loss):

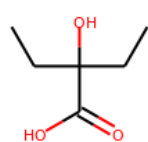

0.008672

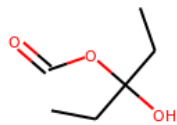

0.040807

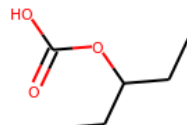

0.047832

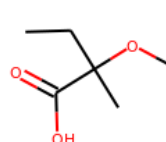

0.052271

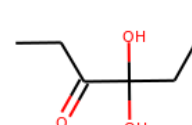

0.056101

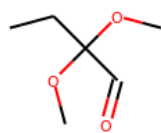

0.065144

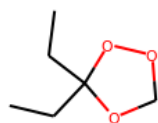

0.067416

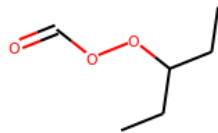

0.068534

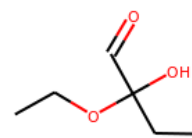

0.069311

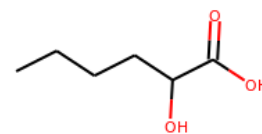

0.071234



|                                   |        |                                |        |
|-----------------------------------|--------|--------------------------------|--------|
| Top predicted substructures       | prob   |                                |        |
| [#6H3][#6][#6]                    | 1.0    | [CX4H2]([#6])[#6]              | 0.9969 |
| [CX4H3]                           | 1.0    | [OX2H1]                        | 0.9963 |
| [CX4H3][#6]                       | 0.9998 | [#8][#6][#6]=[#8]              | 0.9937 |
| [CX4H3][CX4H2]                    | 0.9986 | [OX2H1][CX4H0][CX4H2][CX4H3]   | 0.984  |
| [CX3](=[OX1])C                    | 0.9982 | [#8][#6][#6H2]                 | 0.9778 |
| best positives                    | prob   | best negatives                 | prob   |
| [#6H3][#6][#6]                    | 1.0    | CC#CCC#C                       | 0.0    |
| [CX4H3]                           | 1.0    | CC=CC#CC                       | 0.0    |
| [CX4H3][#6]                       | 0.9998 | [#7][#6]=[#6][#6][#6]=[#7]     | 0.0    |
| [CX4H3][CX4H2]                    | 0.9986 | [#6X2][#6H1][#6X2]             | 0.0    |
| [CX3](=[OX1])C                    | 0.9982 | [CX2H0](#[CX2H0])[CX2H0]       | 0.0    |
| [CX4H2]([#6])[#6]                 | 0.9969 | [CX2H0](#[CX2H1])[CX2H0]       | 0.0    |
| [OX2H1]                           | 0.9963 | CCC=CC#C                       | 0.0    |
| [#8][#6][#6]=[#8]                 | 0.9937 | [CX3H1](=[CX3H2])[CX2H0]       | 0.0    |
| [OX2H1][CX4H0][CX4H2][CX4H3]      | 0.984  | [#7][#6H1][#6X2]               | 0.0    |
| [#8][#6][#6H2]                    | 0.9778 | [CX2H1]#[CX2H0][CX3H1]=[CX3H0] | 0.0    |
| worst negatives                   | prob   | worst positives                | prob   |
| [#8][#6H0][#6H1]                  | 0.581  | OCC[CH2]                       | 0.4724 |
| [CX4H]O                           | 0.425  | [CX4H2]CC=O                    | 0.6997 |
| [CX4H2]([CX4H3])[CX4H1]           | 0.4098 | [#8][#6][#6][#8]               | 0.7739 |
| [#8]=[#6H0][#6H1]                 | 0.3691 | [CX3](=O)[OX2H1]               | 0.8499 |
| O[CX4H][CX4H2]                    | 0.3389 | [CX4H2]([CX4H3])[CX4H0]        | 0.892  |
| [#6H1]                            | 0.3331 | [CX3](=[OX1])O                 | 0.9214 |
| [CX3H0](=[OX1H0])([OX2H1])[CX4H1] | 0.324  | [#6X3][#6][#6][#6H3]           | 0.9237 |
| O=[CX3][CX4H]                     | 0.3215 | [CH3]CC[OH]                    | 0.9642 |
| [CX4H](O)CO                       | 0.3008 | [#8]=[#6][#8]                  | 0.9762 |
| [#6H1][#6H2]                      | 0.2877 | [#8][#6][#6H2]                 | 0.9778 |

---

Example 80 true smiles: CC(C)CC(O)C(=O)O formula: C6H12O3  
Index of correct structure: 0 of 3020  
True structure loss: 0.020035  
True structure:

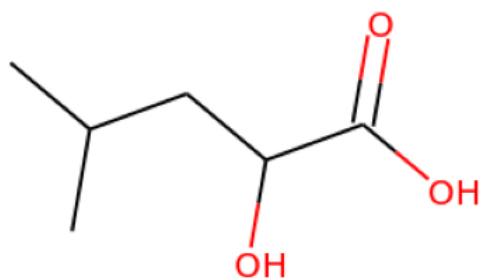

Experimental <sup>13</sup>C NMR (solvent: CDCl<sub>3</sub>)

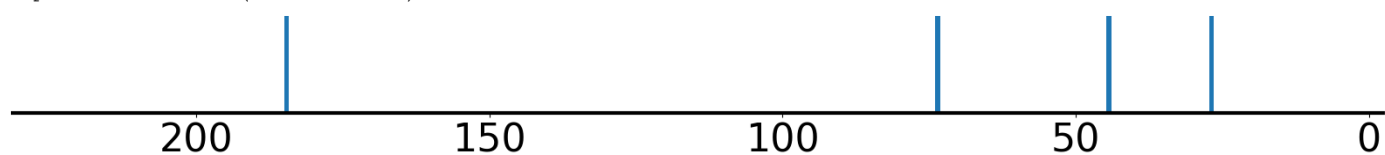

Experimental <sup>1</sup>H NMR (solvent: D<sub>2</sub>O)

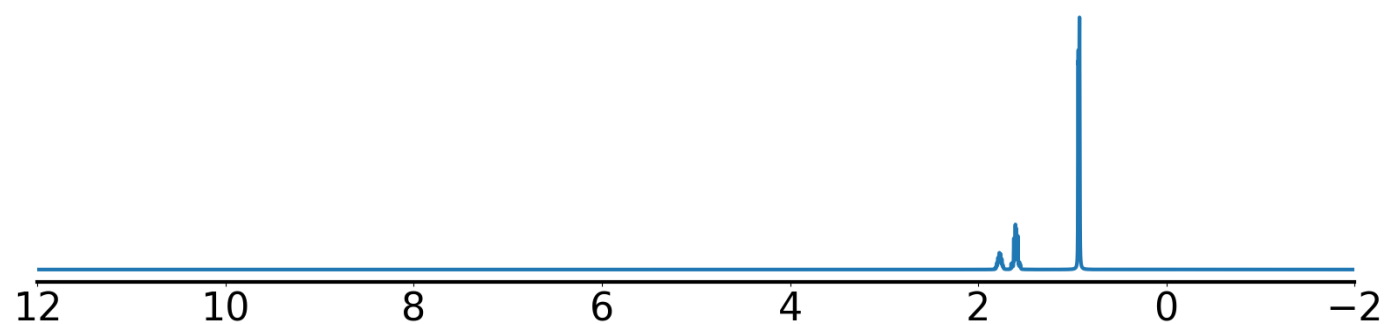

Top predicted structures (loss):

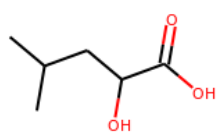

0.020035

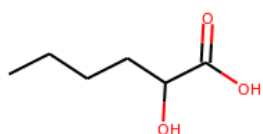

0.051365

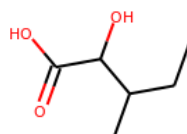

0.057001

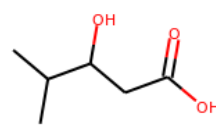

0.057718

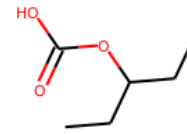

0.06121

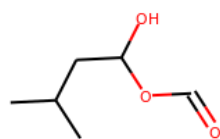

0.061549

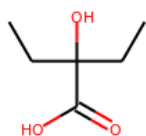

0.061987

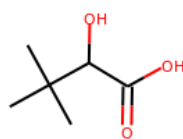

0.063275

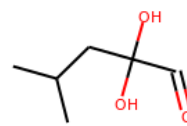

0.063397

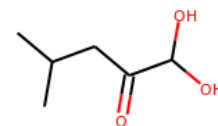

0.064033

|                                   |        |                                        |        |
|-----------------------------------|--------|----------------------------------------|--------|
| Top predicted substructures       | prob   |                                        |        |
| [#6H3][#6][#6]                    | 1.0    | [#6H1]                                 | 0.9954 |
| [CX4H3]                           | 1.0    | [#8]=[#6][#8]                          | 0.9947 |
| [OX2H1]                           | 0.9991 | [CX4H3][#6]                            | 0.9943 |
| [CX3](=[OX1])C                    | 0.9984 | [CX3](=[OX1])O                         | 0.9802 |
| [CX3](=O)[OX2H1]                  | 0.9977 | [CHX4]([CH3X4])[CH3X4]                 | 0.9068 |
| best positives                    | prob   | best negatives                         | prob   |
| [#6H3][#6][#6]                    | 1.0    | [CX3H0](=[CX3H1])([OX2H0])[CX2H0]      | 0.0    |
| [CX4H3]                           | 1.0    | [CX2H1][CX2H0][CX3H1]=[CX3H0]          | 0.0    |
| [OX2H1]                           | 0.9991 | C=CC=CC#C                              | 0.0    |
| [CX3](=[OX1])C                    | 0.9984 | CC#CCC=C                               | 0.0    |
| [CX3](=O)[OX2H1]                  | 0.9977 | [CX2H0](#[CX2H1])[CX4H0]               | 0.0    |
| [#6H1]                            | 0.9954 | CC#CCC#C                               | 0.0    |
| [#8]=[#6][#8]                     | 0.9947 | C=CCCC#C                               | 0.0    |
| [CX4H3][#6]                       | 0.9943 | [CX2H0](#[CX2H1])[CX3H0]               | 0.0    |
| [CX3](=[OX1])O                    | 0.9802 | [CX2H0](#[CX2H1])[CX3H1]               | 0.0    |
| [CHX4]([CH3X4])[CH3X4]            | 0.9068 | CC=CC#CC                               | 0.0    |
| worst negatives                   | prob   | worst positives                        | prob   |
| [CH3]C[OH]                        | 0.6814 | [#8][#6][#6][#8]                       | 0.1115 |
| [#6X3][#6][#6][#6H3]              | 0.6175 | [CX4H](O)CO                            | 0.2115 |
| [#8]=[#6][#6H1][#6H1]             | 0.3635 | [#8H][#6X4H1][#6X3H0]                  | 0.3629 |
| [#8][#6][#6][#6X3]                | 0.2167 | [CX4H1]( [OX2H1 ] )( [CX4H2 ] )[CX3H0] | 0.3949 |
| [#8][#6H1][#6H1]                  | 0.2121 | O[CX4H][CX4H2]                         | 0.415  |
| CCCCC                             | 0.1994 | [CX4H2]([CH])[CH]                      | 0.507  |
| [#6H1][#6H1]                      | 0.1652 | [CX4H2]([CX4H1])[CX4H1]                | 0.5643 |
| [CX3H0](=[OX1H0])([OX2H1])[CX4H2] | 0.1641 | OCC[CH2]                               | 0.5726 |
| [CX4H2][CX3]=O                    | 0.1207 | [#8][#6H0][#6H1]                       | 0.5812 |
| [CX4H2][CX4H2]                    | 0.0943 | [CX4H]O                                | 0.5939 |

---

Example 81 true smiles: CC(O)C(N)C(=O)O formula: C4H9NO3  
 Index of correct structure: 0 of 2840  
 True structure loss: 0.019032  
 True structure:

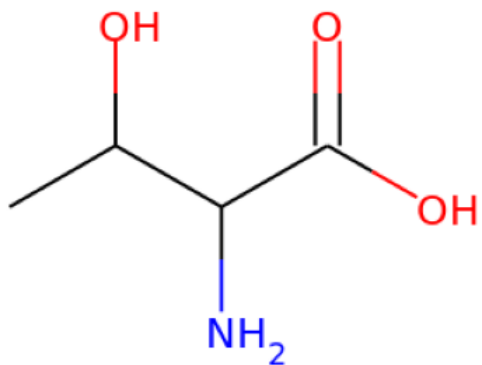

Experimental  $^{13}\text{C}$  NMR (solvent:  $\text{D}_2\text{O}$ )

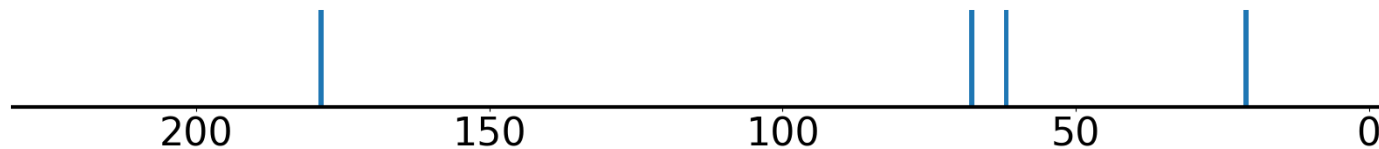

Experimental  $^1\text{H}$  NMR (solvent:  $\text{D}_2\text{O}$ )

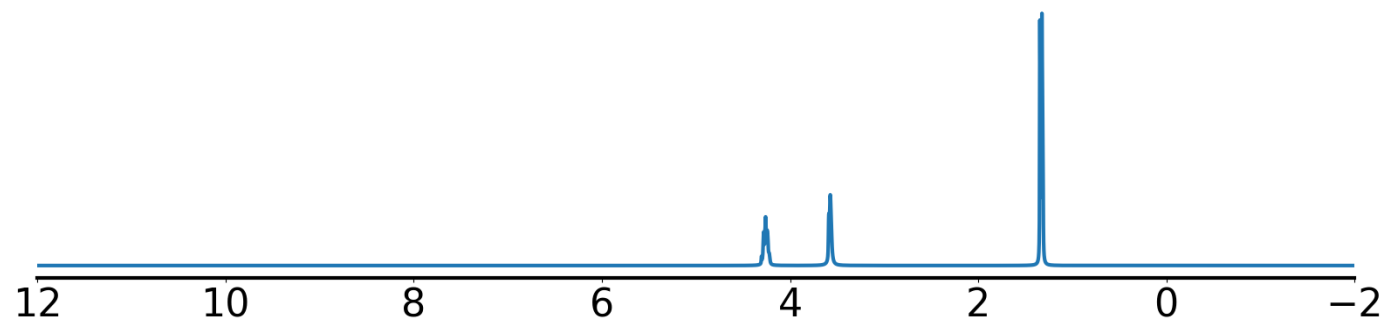

Top predicted structures (loss):

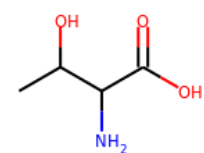

0.019032

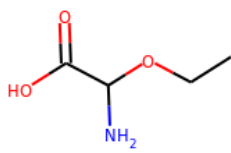

0.032936

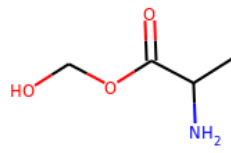

0.03333

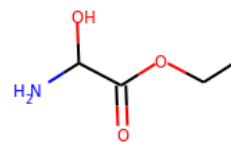

0.036132

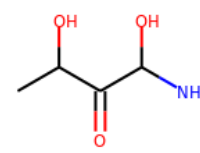

0.040698

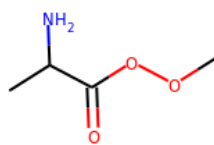

0.04141

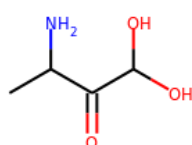

0.047184

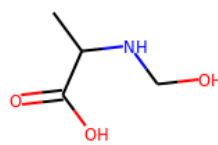

0.048481

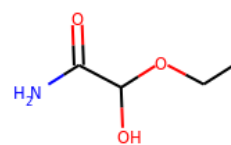

0.050476

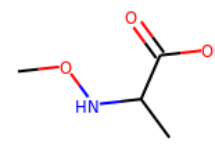

0.050609

|                             |        |                                   |        |
|-----------------------------|--------|-----------------------------------|--------|
| Top predicted substructures | prob   |                                   |        |
| [CX4H3]                     | 0.9999 | [#6H3][#6][#6]                    | 0.9789 |
| [CX4H3][#6]                 | 0.9918 | [CX4H3][CX4]O                     | 0.966  |
| [CX3](=[OX1])C              | 0.9875 | O=[CX3][CX4H]                     | 0.9246 |
| [#6H1]                      | 0.9859 | [#8]=[#6H0][#6H1]                 | 0.9232 |
| [OX2H1]                     | 0.9848 | [#8]=[#6][#8]                     | 0.9216 |
| best positives              | prob   | best negatives                    | prob   |
| [CX4H3]                     | 0.9999 | [CX3H0](=[CX3H1])([CX4H2])[CX2H0] | 0.0    |
| [CX4H3][#6]                 | 0.9918 | [CX2H1]#[CX2H0][CX3H1]=[CX3H0]    | 0.0    |
| [CX3](=[OX1])C              | 0.9875 | CC=CCC#C                          | 0.0    |
| [#6H1]                      | 0.9859 | CC=CC#CC                          | 0.0    |
| [OX2H1]                     | 0.9848 | [#6X2][#6H1][#6X2]                | 0.0    |
| [#6H3][#6][#6]              | 0.9789 | C=CC=CC#C                         | 0.0    |
| [CX4H3][CX4]O               | 0.966  | CC#CCC=C                          | 0.0    |
| O=[CX3][CX4H]               | 0.9246 | C=CCCC#C                          | 0.0    |
| [#8]=[#6H0][#6H1]           | 0.9232 | [#6H2][#6][#6X2]                  | 0.0    |
| [#8]=[#6][#8]               | 0.9216 | CCC#CC=C                          | 0.0    |
| worst negatives             | prob   | worst positives                   | prob   |
| [CX4H2]([#6])[O]            | 0.5983 | [#6X3][#6][#6][#6H3]              | 0.2785 |
| [#8][#6][#6]=[#8]           | 0.4209 | [#6H3][#6H1][#6H1][#7]            | 0.2965 |
| [#6H3][#6][#6X3]            | 0.3388 | [#8][#6][#6][#6X3]                | 0.3994 |
| [CX4H2]CC=O                 | 0.3001 | [#6X4H3][#6][#8H]                 | 0.4933 |
| [#7][#6H0][#6H1]            | 0.2864 | [#6H1][#6H1]                      | 0.5406 |
| [CX4H2]([OX2H0])[CX4H3]     | 0.2696 | [OH][CX4H]                        | 0.5581 |
| [CX4H2][CX4H2]              | 0.2452 | [CX4H1]([OX2H1])([CX4H3])[CX4H1]  | 0.576  |
| [#8][#6][#6][#8]            | 0.2327 | [#8][#6H1][#6H1]                  | 0.5925 |
| [CH3]CC[OH]                 | 0.2293 | [CX4H3][CX4H1][OX2H1]             | 0.6009 |
| [#7H2][#6H0]                | 0.2184 | [#7H2][#6X4H1][#6X3]              | 0.609  |

---

Example 82 true smiles: CC(O)C(N)C(=O)O formula: C4H9NO3  
Index of correct structure: 1 of 2840  
True structure loss: 0.031016  
True structure:

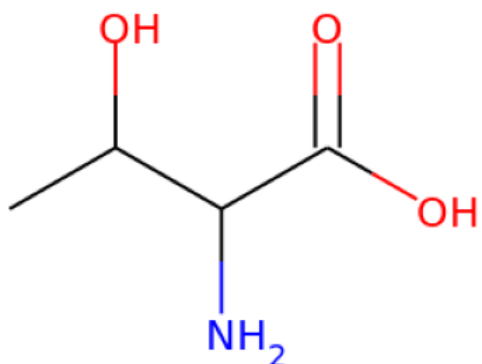

Experimental <sup>13</sup>C NMR (solvent: D<sub>2</sub>O)



Experimental <sup>1</sup>H NMR (solvent: D<sub>2</sub>O)

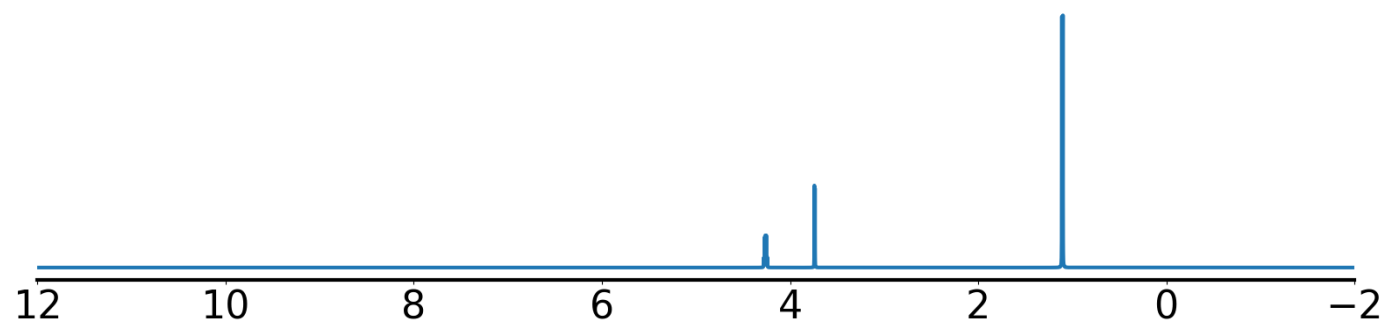

Top predicted structures (loss):

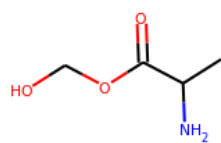

0.025

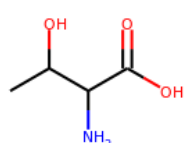

0.031016

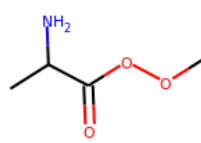

0.031602

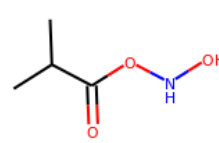

0.033318

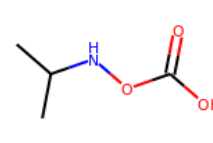

0.033689

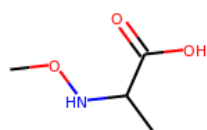

0.033888

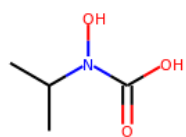

0.035416

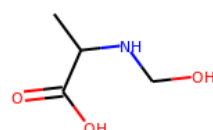

0.035595

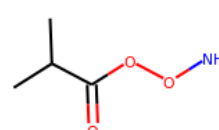

0.03611

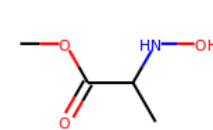

0.037933

|                             |        |                                  |        |
|-----------------------------|--------|----------------------------------|--------|
| Top predicted substructures | prob   |                                  |        |
| [CX4H3]                     | 1.0    | [#6H1]                           | 0.9642 |
| [CX4H3][#6]                 | 0.9918 | [#8]=[#6][#8]                    | 0.9089 |
| [OX2H1]                     | 0.9871 | O=[CX3][CX4H]                    | 0.8589 |
| [CX3](=[OX1])C              | 0.9834 | [#8]=[#6H0][#6H1]                | 0.8369 |
| [#6H3][#6][#6]              | 0.9697 | [CX3](=[OX1])O                   | 0.8324 |
| best positives              | prob   | best negatives                   | prob   |
| [CX4H3]                     | 1.0    | CC=CC#CC                         | 0.0    |
| [CX4H3][#6]                 | 0.9918 | [CX2H1]#[CX2H0][CX3H1]=[CX3H0]   | 0.0    |
| [OX2H1]                     | 0.9871 | CC=CCC#C                         | 0.0    |
| [CX3](=[OX1])C              | 0.9834 | [CX3H1](=[CX3H2])[CX2H0]         | 0.0    |
| [#6H3][#6][#6]              | 0.9697 | C=CCCC#C                         | 0.0    |
| [#6H1]                      | 0.9642 | CCC#CC#C                         | 0.0    |
| [#8]=[#6][#8]               | 0.9089 | [#6X2][#6H1][#6X2]               | 0.0    |
| O=[CX3][CX4H]               | 0.8589 | CC#CC=C                          | 0.0    |
| [#8]=[#6H0][#6H1]           | 0.8369 | [CX2H0](#[CX2H1])[CX4H2]         | 0.0    |
| [CX3](=[OX1])O              | 0.8324 | C=CC=CC#C                        | 0.0    |
| worst negatives             | prob   | worst positives                  | prob   |
| [CX4H2]([#6])[O]            | 0.5832 | [#6H3][#6H1][#6H1][#7]           | 0.1181 |
| [#8][#6][#6]=[#8]           | 0.4536 | [#8]=[#6][#6H1][#6H1]            | 0.1507 |
| [#7][#6][#6H3]              | 0.4487 | [#8][#6H1][#6H1]                 | 0.1525 |
| [#8][#6][#6][#8]            | 0.3676 | [#6H1][#6H1]                     | 0.1635 |
| [CH3]CC[OH]                 | 0.3278 | [#6X3][#6][#6][#6H3]             | 0.1894 |
| [#6H3][#6][#6X3]            | 0.3236 | [#8][#6][#6][#6X3]               | 0.2548 |
| [#6H1][#6H2]                | 0.3038 | [CH3][#6][#8]                    | 0.342  |
| [#8][#6][#6H2]              | 0.2832 | [#7H2][#6H1]                     | 0.3963 |
| [#7][#6H0][#6H1]            | 0.2473 | [CX4H1]([OX2H1])([CX4H3])[CX4H1] | 0.4086 |
| [#8H][#6H2][#6H1]           | 0.2472 | [CX4H]O                          | 0.4222 |

---

Example 83 true smiles: CC(O)C(N)C(=O)O formula: C4H9NO3  
 Index of correct structure: 0 of 2840  
 True structure loss: 0.019013  
 True structure:



Experimental <sup>13</sup>C NMR (solvent: D2O)



Experimental <sup>1</sup>H NMR (solvent: D2O)

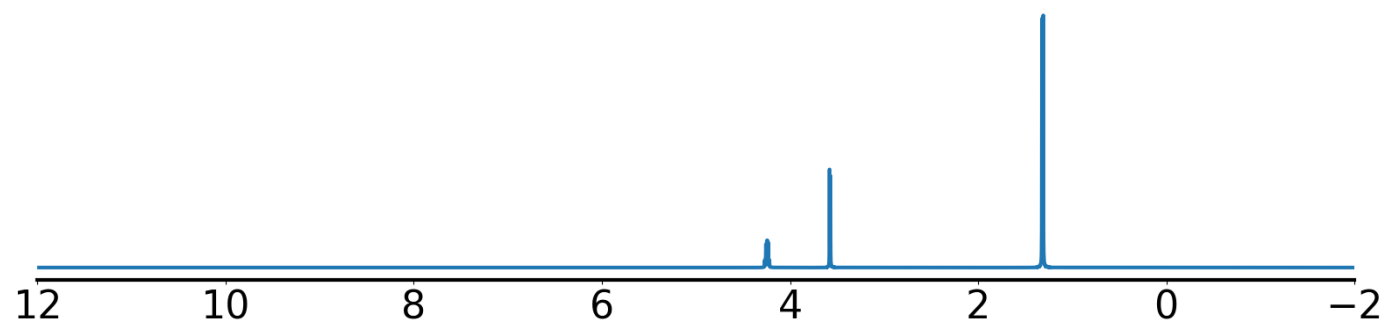

Top predicted structures (loss):

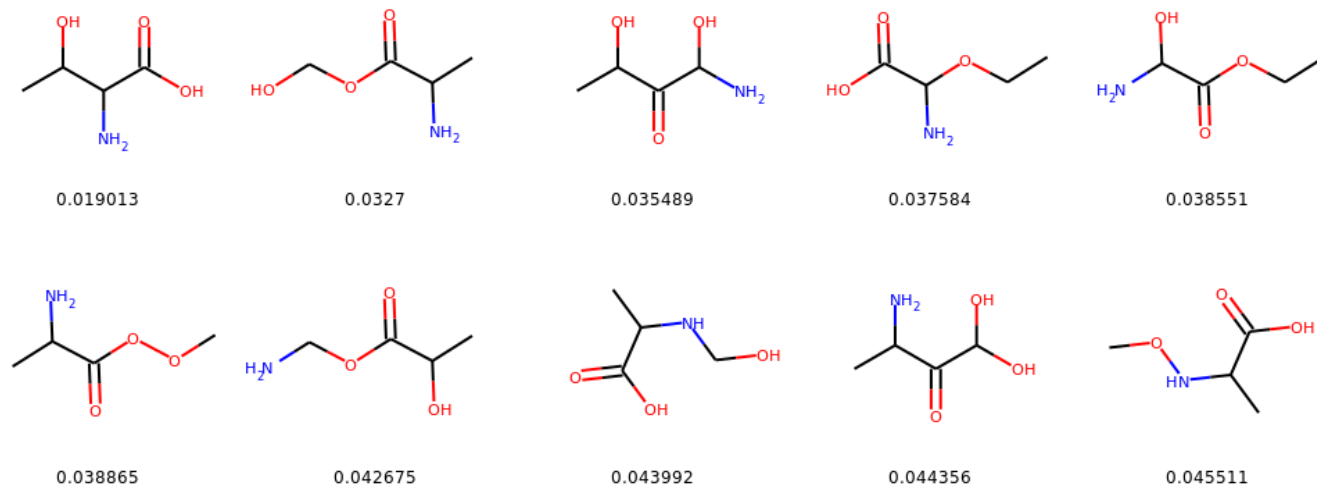



|                             |        |                                   |        |
|-----------------------------|--------|-----------------------------------|--------|
| Top predicted substructures | prob   |                                   |        |
| [CX4H3]                     | 1.0    | [CX3](=[OX1])C                    | 0.9751 |
| [CX4H3][#6]                 | 0.9925 | [#6H1]                            | 0.9466 |
| [OX2H1]                     | 0.9821 | O=[CX3][CX4H]                     | 0.9127 |
| [#6H3][#6][#6]              | 0.9819 | [#8]=[#6H0][#6H1]                 | 0.9064 |
| [CX4H3][CX4]O               | 0.9773 | [#8]=[#6][#8]                     | 0.8861 |
| best positives              | prob   | best negatives                    | prob   |
| [CX4H3]                     | 1.0    | [CX2H1]#[CX2H0][CX3H1]=[CX3H0]    | 0.0    |
| [CX4H3][#6]                 | 0.9925 | CC=CC#CC                          | 0.0    |
| [OX2H1]                     | 0.9821 | [CX2H0](#[CX2H1])[CX4H2]          | 0.0    |
| [#6H3][#6][#6]              | 0.9819 | [#6X2][#6H1][#6X2]                | 0.0    |
| [CX4H3][CX4]O               | 0.9773 | CC=CCC#C                          | 0.0    |
| [CX3](=[OX1])C              | 0.9751 | C=CCCC#C                          | 0.0    |
| [#6H1]                      | 0.9466 | [CX3H0](=[CX3H1])([CX4H2])[CX2H0] | 0.0    |
| O=[CX3][CX4H]               | 0.9127 | [CX3H1](=[CX3H2])[CX2H0]          | 0.0    |
| [#8]=[#6H0][#6H1]           | 0.9064 | CCC#CC=C                          | 0.0    |
| [#8]=[#6][#8]               | 0.8861 | CCC#CC#C                          | 0.0    |
| worst negatives             | prob   | worst positives                   | prob   |
| [#8][#6][#6]=[#8]           | 0.5384 | [#6X3][#6][#6][#6H3]              | 0.2192 |
| [#6H3][#6][#6X3]            | 0.5148 | [#8][#6][#6][#6X3]                | 0.2821 |
| [CH3]CC[OH]                 | 0.2652 | [#8][#6H1][#6H1]                  | 0.328  |
| [#8][#6][#6][#8]            | 0.2423 | [#6H3][#6H1][#6H1][#7]            | 0.3898 |
| [CX4H2]([#6])[O]            | 0.2382 | [#6H1][#6H1]                      | 0.4927 |
| [#7H2][#6H0]                | 0.2323 | [#8]=[#6][#6H1][#6H1]             | 0.5244 |
| [#7][#6H0][#6H1]            | 0.2256 | [#7H2][#6X4H1][#6X3]              | 0.6013 |
| [#8H][#6X4H1][#6X3H0]       | 0.2222 | [CX4H1]([OX2H1])([CX4H3])[CX4H1]  | 0.6032 |
| [#6H1r5][#7]                | 0.2187 | [#7H2][#6H1]                      | 0.6123 |
| [CX4H](O)CO                 | 0.211  | [CX3H0](=[OX1H0])([OX2H1])[CX4H1] | 0.6604 |

---

Example 84 true smiles: O=C(O)C=CCC(=O)O formula: C5H6O4  
Index of correct structure: 0 of 2762  
True structure loss: 0.016883  
True structure:

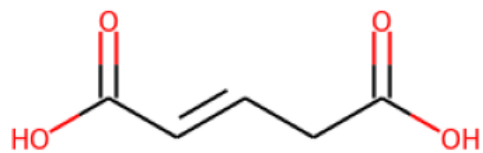

Experimental <sup>13</sup>C NMR (solvent: CDCl<sub>3</sub>)

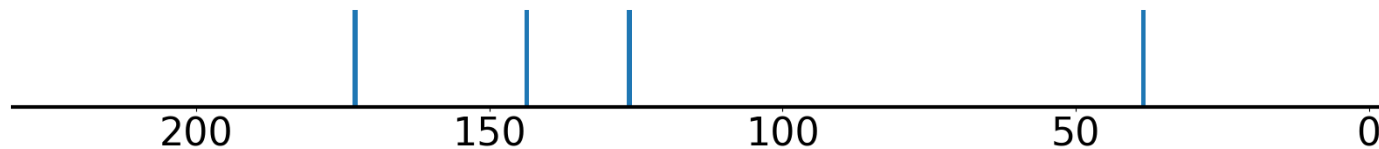

Experimental <sup>1</sup>H NMR (solvent: D<sub>2</sub>O)

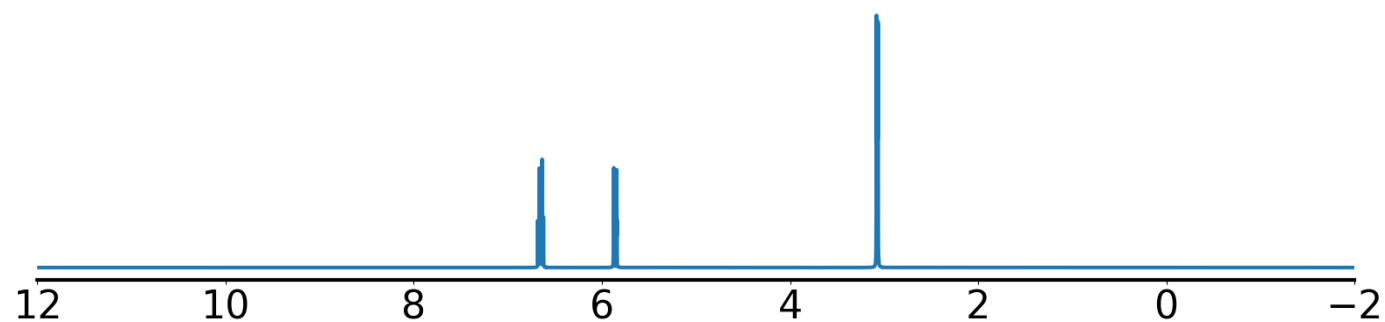

Top predicted structures (loss):

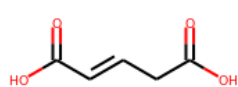

0.016883

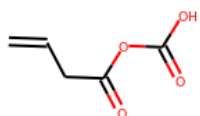

0.05633

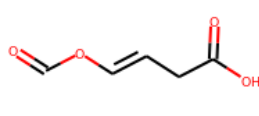

0.059739

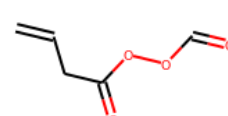

0.071016

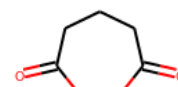

0.071765

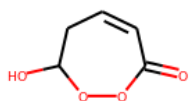

0.074151

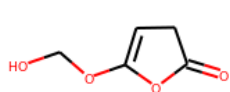

0.07869

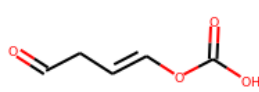

0.081863

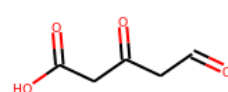

0.082281

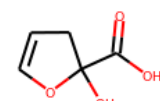

0.083658

| Top predicted substructures       | prob   |                                |        |
|-----------------------------------|--------|--------------------------------|--------|
| [#8]=[#6][#8]                     | 0.9998 | [CX3](=O)[OX2H1]               | 0.9559 |
| [CX3](=[OX1])O                    | 0.9992 | [CHX3](=C)C                    | 0.9552 |
| [#6H1]                            | 0.9781 | [OX2H1]                        | 0.9543 |
| O=C[CH2][CX3H1]                   | 0.9628 | [OX1H0]=[CX3H0][CX4H2][CX3H1]  | 0.9305 |
| [CX3](=[OX1])C                    | 0.9561 | [CX4H2]([#6])[#6]              | 0.928  |
| best positives                    | prob   | best negatives                 | prob   |
| [#8]=[#6][#8]                     | 0.9998 | [CX2H0](#[CX2H0])[CX2H0]       | 0.0    |
| [CX3](=[OX1])O                    | 0.9992 | [CX2H0](#[CX2H1])[CX4H0]       | 0.0    |
| [#6H1]                            | 0.9781 | C=CC=CC#C                      | 0.0    |
| O=C[CH2][CX3H1]                   | 0.9628 | CC#CCC#C                       | 0.0    |
| [CX3](=[OX1])C                    | 0.9561 | [#6X2][#6H1][#6X2]             | 0.0    |
| [CX3](=O)[OX2H1]                  | 0.9559 | [CX2H0](#[CX2H1])[CX4H1]       | 0.0    |
| [CHX3](=C)C                       | 0.9552 | [CX4H2](#[CX4H3])[CX2H0]       | 0.0    |
| [OX2H1]                           | 0.9543 | [OX2H0][CX4H2][CX2H0]#[CX2H1]  | 0.0    |
| [OX1H0]=[CX3H0][CX4H2][CX3H1]     | 0.9305 | [#7][#6H1][#6X2]               | 0.0    |
| [CX4H2]([#6])[#6]                 | 0.928  | [CX2H0](#[CX2H0])[CX4H0]       | 0.0    |
| worst negatives                   | prob   | worst positives                | prob   |
| [CX3H0](=[OX1H0])([OX2H1])[CX3H0] | 0.6393 | [CX3H1](=[CX3H1])[CX3H0]       | 0.2616 |
| [CX4H2]CC=O                       | 0.6297 | [#8]=[#6H0][#6H1]              | 0.3787 |
| OCC[CH2]                          | 0.3754 | [#8]=[#6][#6H2][#6H1]          | 0.4918 |
| [OX2H0][CX3H0][CX4H2]             | 0.2364 | [#8]=[#6][#6H1]=[#6H1]         | 0.5197 |
| [#8][#6][#6][#8]                  | 0.1611 | [OX1H0]=[CX3H0][CX3H1]=[CX3H1] | 0.5227 |
| [CX4H2][CX4H2]                    | 0.1489 | O=C[CX3H]                      | 0.6198 |
| [CX3H0](=[OX1H0])([OX2H0])[CX4H2] | 0.1372 | O=[#6][#6][#6X3]               | 0.6245 |
| [#8][#6][#6]=[#6][#6]=[#8]        | 0.1308 | [#6X3H1][#6X3H0]               | 0.6268 |
| [#6X3H2]                          | 0.1296 | [CX4H2][CX3H]                  | 0.6295 |
| [CX3H](O)                         | 0.1002 | [#8][#6H0][#6H1]               | 0.663  |

---

Example 85 true smiles: C=C(CC(=O)O)C(=O)O formula: C5H6O4  
 Index of correct structure: 0 of 2762  
 True structure loss: 0.01308  
 True structure:

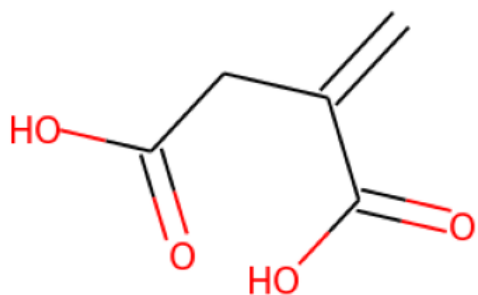

Experimental <sup>13</sup>C NMR (solvent: D2O)

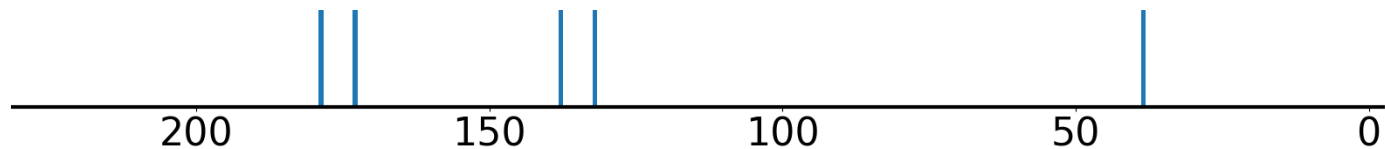

Experimental <sup>1</sup>H NMR (solvent: D2O)

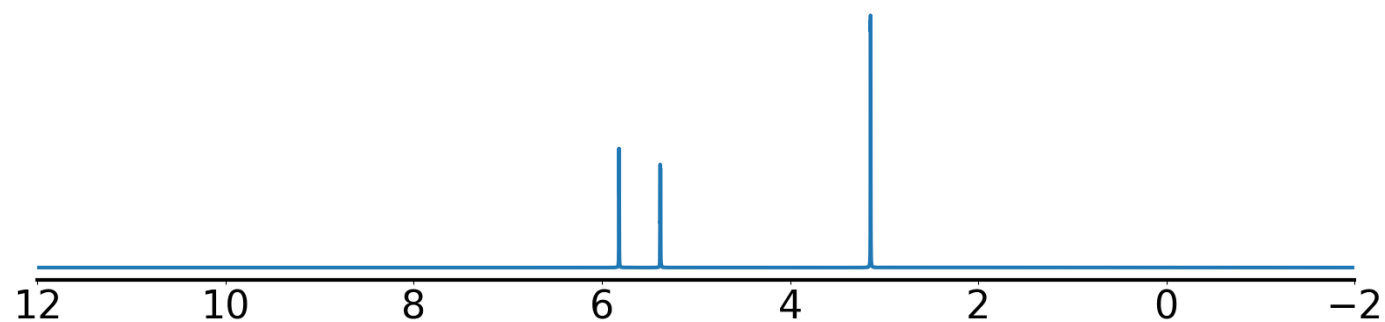

Top predicted structures (loss):

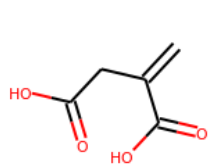

0.01308

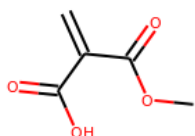

0.078413

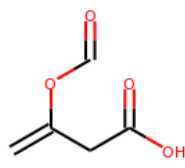

0.083502

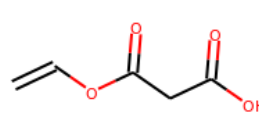

0.086334

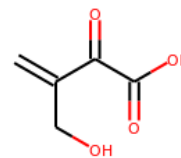

0.095294

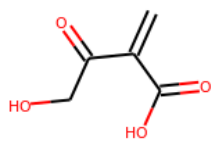

0.098375

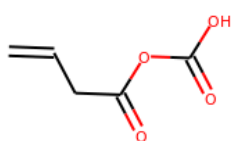

0.099115

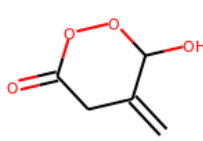

0.100337

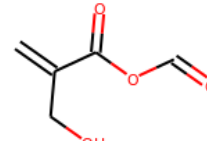

0.107447

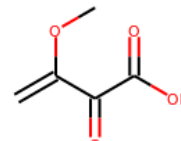

0.109385

| Top predicted substructures       | prob   |                                              | prob   |
|-----------------------------------|--------|----------------------------------------------|--------|
| [#8]=[#6][#8]                     | 0.9999 | [CX3H2]=[CX3H0]([#6])[#6]                    | 0.9956 |
| [CX3](=[OX1])O                    | 0.9999 | [CX4H2]([CX3H0])[CX3H0]                      | 0.989  |
| [#6X3H2]                          | 0.9996 | [CX4H2]([#6])[#6]                            | 0.986  |
| [CX3](=[OX1])C                    | 0.9991 | [CH2X3](=C)                                  | 0.9855 |
| [CX3](=O)[OX2H1]                  | 0.9978 | [CX3H2]=[CX3H0][CX3H0]                       | 0.9796 |
| best positives                    | prob   | best negatives                               | prob   |
| [#8]=[#6][#8]                     | 0.9999 | [#6X2][#6H1][#6X2]                           | 0.0    |
| [CX3](=[OX1])O                    | 0.9999 | [CX2H0](#[CX2H1])[CX4H0]                     | 0.0    |
| [#6X3H2]                          | 0.9996 | [CX4H1]([CX4H1])([CX4H1])[CX2H0]             | 0.0    |
| [CX3](=[OX1])C                    | 0.9991 | [CX2H0](#[CX2H0])[CX2H0]                     | 0.0    |
| [CX3](=O)[OX2H1]                  | 0.9978 | [OX2H0][CX4H1][CX4H1]([CX4H2][CX4H1])[CX4H1] | 0.0    |
| [CX3H2]=[CX3H0]([#6])[#6]         | 0.9956 | CCC#CC#C                                     | 0.0    |
| [CX4H2]([CX3H0])[CX3H0]           | 0.989  | [CX4H1]([CX4H2])([CX4H1])[CX2H0]             | 0.0    |
| [CX4H2]([#6])[#6]                 | 0.986  | [CX2H0](#[CX2H0])[CX4H0]                     | 0.0    |
| [CH2X3](=C)                       | 0.9855 | [CX4H1]([OX2H0])([CX4H1])[CX2H0]             | 0.0    |
| [CX3H2]=[CX3H0][CX3H0]            | 0.9796 | [OX2H1][CX4H1][CX4H1][CX2H0]                 | 0.0    |
| worst negatives                   | prob   | worst positives                              | prob   |
| [OX2H0][CX3H0][CX4H2]             | 0.4063 | [#8][#6][#6][#6][#6][#8]                     | 0.0349 |
| [#6H1]                            | 0.2111 | [#8]=[#6][#6][#6][#6]=[#8]                   | 0.1646 |
| [CX3H0](=[OX1H0])([OX2H0])[CX4H2] | 0.1825 | [#8][#6][#6][#6][#6]=[#8]                    | 0.4123 |
| [#8][#6][#6]=[#6][#6]=[#8]        | 0.1558 | [CX4H2]CC=O                                  | 0.5706 |
| [#8][#6H0][#6H1]                  | 0.1497 | [CX3H0](=[CX3H2])([CX4H2])[CX3H0]            | 0.7751 |
| [#6X3H1][#6X3H0]                  | 0.1425 | [#8][#6][#6]=[#6X3]                          | 0.777  |
| [CX4H2][CX3H]                     | 0.1416 | [#8][#6][#6][#6X3]                           | 0.7802 |
| [#8]=[#6][#6H2][#6H1]             | 0.1256 | [#6H2][#6X3H0]=[#6H2]                        | 0.8025 |
| [#8][#6][#6]=[#8]                 | 0.1026 | [CX3H2]=[CX3H0]                              | 0.8101 |
| [CX4H3]                           | 0.0873 | OCC[CH2]                                     | 0.8142 |

---

Example 86 true smiles: COC(=O)C=CC(=O)O formula: C5H6O4  
Index of correct structure: 0 of 2762  
True structure loss: 0.040183  
True structure:

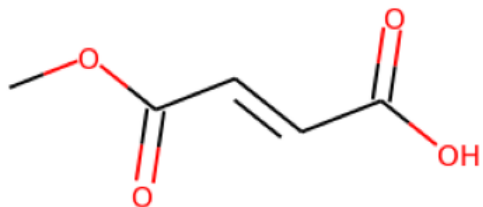

Experimental <sup>13</sup>C NMR (solvent: CDCl<sub>3</sub>)

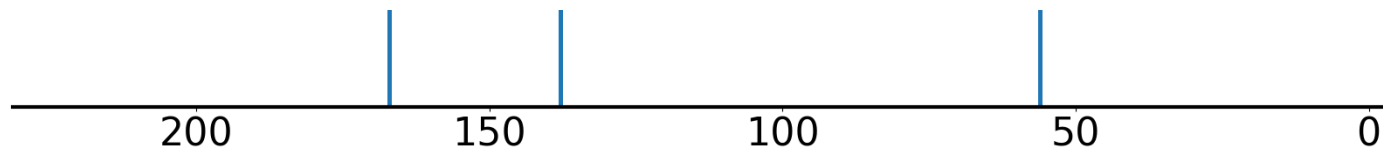

Experimental <sup>1</sup>H NMR (solvent: D<sub>2</sub>O)

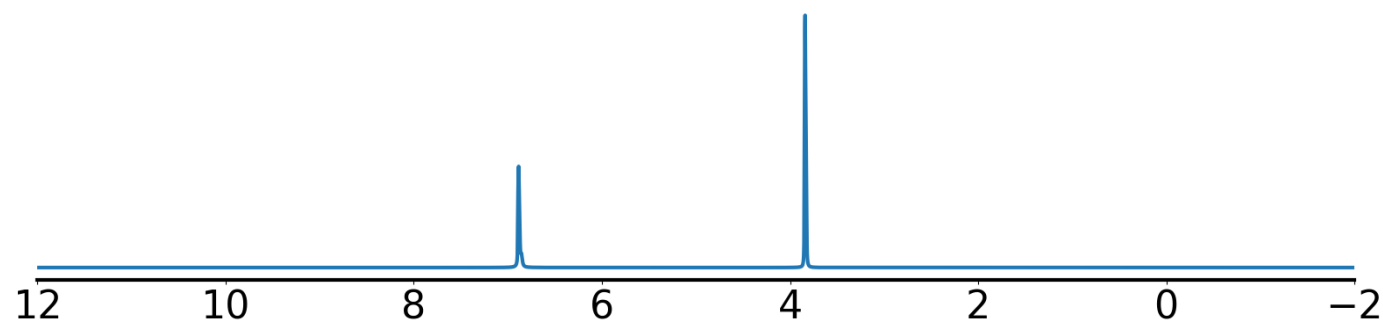

Top predicted structures (loss):

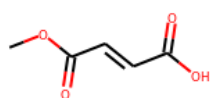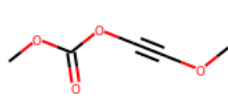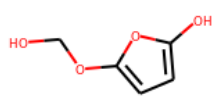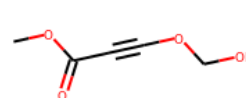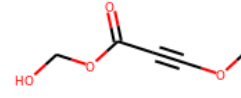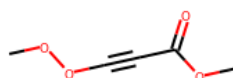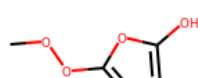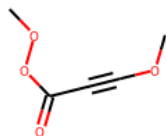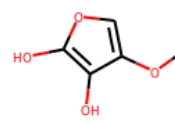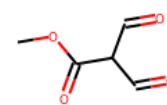

| Top predicted substructures   | prob        |                                           |             |
|-------------------------------|-------------|-------------------------------------------|-------------|
| [#6H1]                        | 0.9951      | [CX3](=[OX1])C                            | 0.7348      |
| [#8]=[#6][#8]                 | 0.9951      | [#6H1][#6H1]                              | 0.7214      |
| [CX3](=[OX1])O                | 0.9796      | [OX2H1]                                   | 0.715       |
| [#6X3][#6X3]                  | 0.8261      | [OX1H0]=[CX3H0][OX2H0][CX4H3]             | 0.6375      |
| [#8][#6][#6][#6X3]            | 0.737       | O=[#6][#6]=[#6X3]                         | 0.6018      |
| <b>best positives</b>         | <b>prob</b> | <b>best negatives</b>                     | <b>prob</b> |
| [#6H1]                        | 0.9951      | [CX4H0]([NX3H1])([CX4H3])([CX4H2])[CX4H1] | 0.0         |
| [#8]=[#6][#8]                 | 0.9951      | [CX4H2]([CX4H3])[CX2H0]                   | 0.0         |
| [CX3](=[OX1])O                | 0.9796      | [CX3H0]([CX3H2])([CX4H3])[CX4H2]          | 0.0         |
| [#6X3][#6X3]                  | 0.8261      | [CX4H2]([NX3H0])[CX4H3]                   | 0.0         |
| [CX3](=[OX1])C                | 0.7348      | CCC#CC#C                                  | 0.0         |
| [OX2H1]                       | 0.715       | [CX2H0](#[CX2H1])[CX4H0]                  | 0.0         |
| [OX1H0]=[CX3H0][OX2H0][CX4H3] | 0.6375      | [#7][#6][#6][#6][#7]                      | 0.0         |
| O=[#6][#6][#6][#6X3]          | 0.6018      | [#6H3][#6H0][#7][#6H3]                    | 0.0         |
| [CHX3](=C)C                   | 0.5702      | CC#CC#C                                   | 0.0         |
| [#8][#6][#6]=[#6X3]           | 0.549       | [#7X2]=[#6X3H1][#7X3H0][#6H3]             | 0.0         |
| <b>worst negatives</b>        | <b>prob</b> | <b>worst positives</b>                    | <b>prob</b> |
| [#8][#6][#6][#6X3]            | 0.737       | [#6X3][#6X3]=[#6X3][#6X3]                 | 0.0222      |
| [#6H1][#6H1]                  | 0.7214      | [CX3H0][CX3H1]=[CX3H1][CX3H0]             | 0.0512      |
| [CX4H](O)([CH])[CH]           | 0.4793      | [CX3H1]([CX3H1])[CX3H0]                   | 0.0923      |
| [#8]=[#6][#6H1][#6H1]         | 0.3353      | [#8][#6][#6]=[#6][#6]=[#8]                | 0.1654      |
| [#8][#6][#6][#8]              | 0.3227      | [OX1H0]=[CX3H0][CX3H1]=[CX3H1]            | 0.1749      |
| [#8][#6H1][#6H1]              | 0.2854      | [CX4H3]                                   | 0.1827      |
| [cH]                          | 0.2787      | [#8]=[#6][#6]=[#6][#6]=[#8]               | 0.1836      |
| O=[#6][#6][#6X3]              | 0.2746      | [CX3H0]([OX1H0])([OX2H0])[CX3H1]          | 0.2073      |
| [#8][#6][#6]=[#8]             | 0.2572      | [#8][#6][#6]=[#6][#6][#8]                 | 0.2336      |
| [CX4H](O)CO                   | 0.2002      | [#8]=[#6][#6H1]=[#6H1]                    | 0.2805      |

---

Example 87 true smiles: O=Cc1ccc(O)c1 formula: C7H6O2  
Index of correct structure: 2 of 2390  
True structure loss: 0.014748  
True structure:

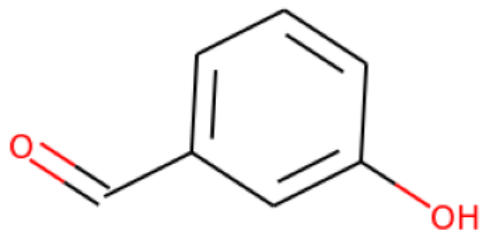

Experimental <sup>13</sup>C NMR (solvent: CDCl<sub>3</sub>)

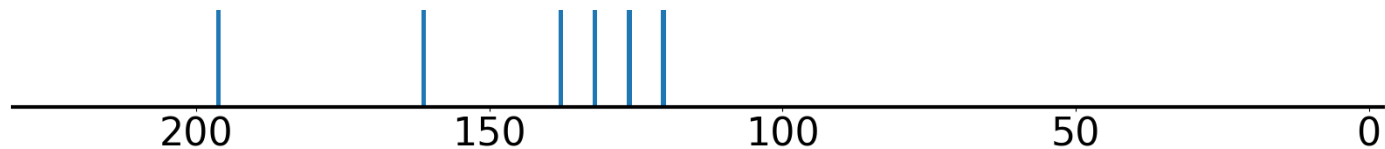

Experimental <sup>1</sup>H NMR (solvent: CDCl<sub>3</sub>)

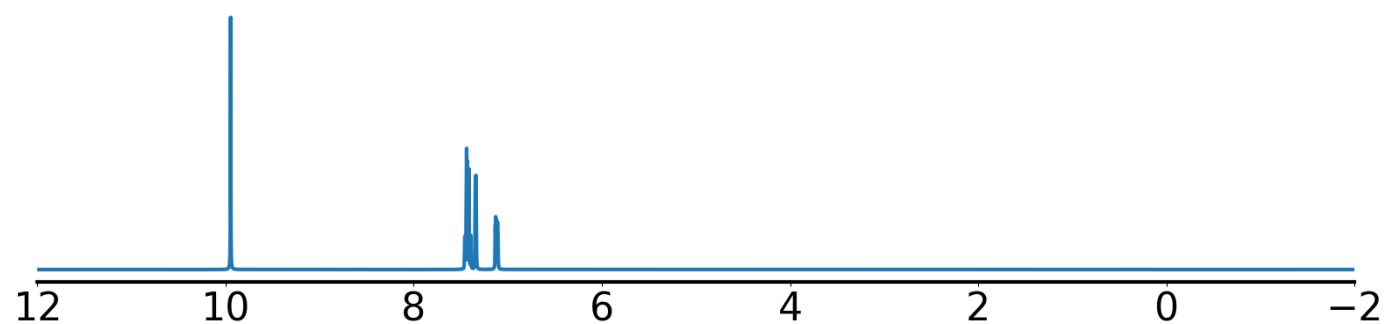

Top predicted structures (loss):

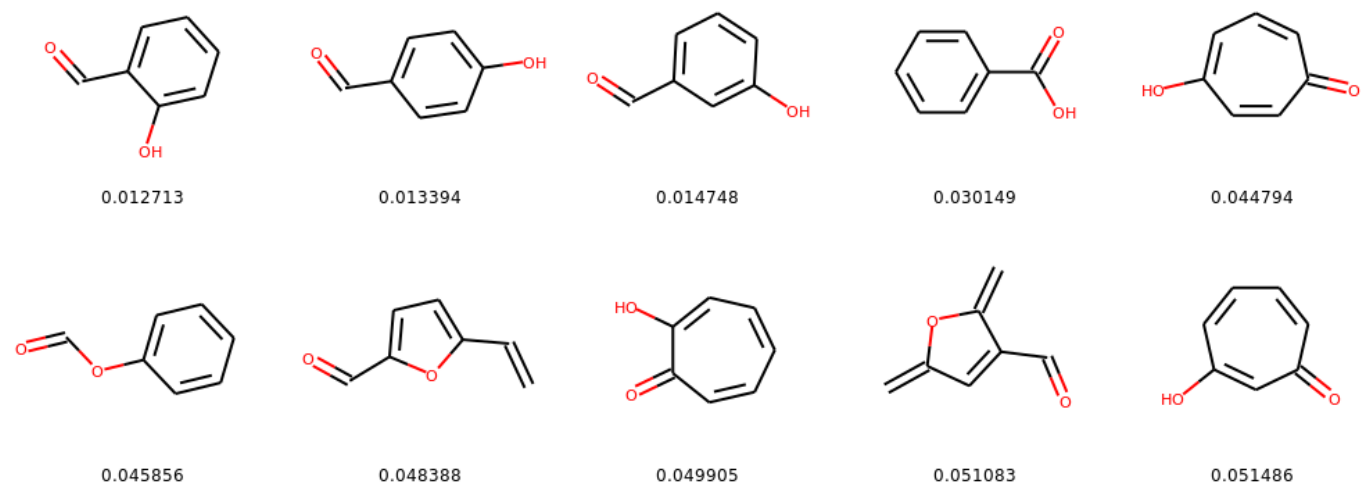



|                              |        |                                           |        |
|------------------------------|--------|-------------------------------------------|--------|
| Top predicted substructures  | prob   |                                           |        |
| [#6X3][#6X3]                 | 1.0    | O=[#6][#6][#6X3]                          | 0.9974 |
| [#6H1]                       | 0.9999 | [cH][cH]                                  | 0.991  |
| [CX3H1](=O)[#6]              | 0.9996 | [cH]                                      | 0.9868 |
| [#6X3][#6X3][#6X3][#6X3]     | 0.9994 | [#6H1][#6H1]                              | 0.9561 |
| [#6X3H1][#6X3H0]             | 0.9985 | [cX3H1]([cX3H1])[cX3H0]                   | 0.9441 |
| best positives               | prob   | best negatives                            | prob   |
| [#6X3][#6X3]                 | 1.0    | [OX2H0][CX4H2][CX4H2][CX4H1][OX2H0]       | 0.0    |
| [#6H1]                       | 0.9999 | [CX4H1]([NX3H2])([CX4H2])[CX3H1]          | 0.0    |
| [CX3H1](=O)[#6]              | 0.9996 | [CX4H0]([NX3H1])([CX4H3])([CX4H2])[CX4H1] | 0.0    |
| [#6X3][#6X3][#6X3][#6X3]     | 0.9994 | [OX2H0][CX4H2][CX4H1]([CX4H1])[CX4H1]     | 0.0    |
| [#6X3H1][#6X3H0]             | 0.9985 | [OX2H0]1[CX4H2][CX4H2][CX4H1][CX4H1]1     | 0.0    |
| O=[#6][#6][#6X3]             | 0.9974 | [CX4H1]([NX3H0])([CX4H2])[CX4H1]          | 0.0    |
| [cH][cH]                     | 0.991  | [CX4H1]([NX3H1])([CX4H3])[CX4H2]          | 0.0    |
| [cH]                         | 0.9868 | [CX4H1]([OX2H1])([CX4H2])[CX2H0]          | 0.0    |
| [#6H1][#6H1]                 | 0.9561 | [CX4H1]([NX3H1])([CX4H2])[CX4H0]          | 0.0    |
| [cX3H1]([cX3H1])[cX3H0]      | 0.9441 | [CX4H0]([NX3H1])([CX4H2])([CX4H2])[CX4H1] | 0.0    |
| worst negatives              | prob   | worst positives                           | prob   |
| [CX3](=[OX1])C               | 0.5104 | [cX3H1]([cX3H0])[cX3H0]                   | 0.1209 |
| [#8]=[#6][#6H1][#6H1]        | 0.3707 | [cX3H0][cX3H1][cX3H0][OX2H1]              | 0.1317 |
| [cX3H0][cX3H1][cX3H1][cX3H0] | 0.2449 | [cH]cO                                    | 0.2764 |
| O=C[CX3H]                    | 0.1634 | [OX2H][cX3]:[c]                           | 0.2978 |
| [#8]=[#6H0][#6H1]            | 0.1448 | [#8][#6][#6][#6][#6]=[#8]                 | 0.3558 |
| [#8]=[#6H][#6X3]=[#6X3H]     | 0.1373 | [OX2H1]                                   | 0.5037 |
| [#8][#6H][#6X3][#6X3H]       | 0.1056 | [#8][#6H0][#6H1]                          | 0.6102 |
| [#8]=[#6H1][#6H1]            | 0.0906 | [#8][#6][#6][#6X3]                        | 0.6365 |
| [OX1H0]=[cX3H0][cX3H1]       | 0.0877 | [#6X3H1][#6X3H1][#6X3H0][#6X3H1]          | 0.7175 |
| [CX3H1]([cX3H1])[cX3H1]      | 0.0872 | [#6]1[#6][#6][#6][#6]1                    | 0.7588 |

---

Example 88 true smiles: c1ccc2[nH]ccc2c1 formula: C8H7N  
Index of correct structure: 0 of 2370  
True structure loss: 0.008669  
True structure:

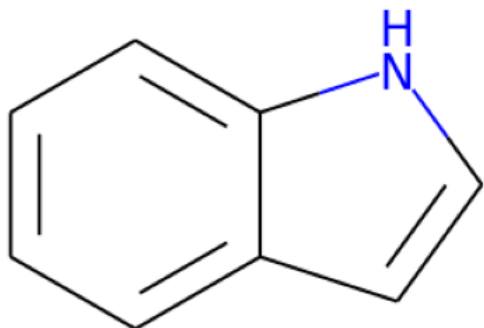

Experimental <sup>13</sup>C NMR (solvent: CDCl<sub>3</sub>)

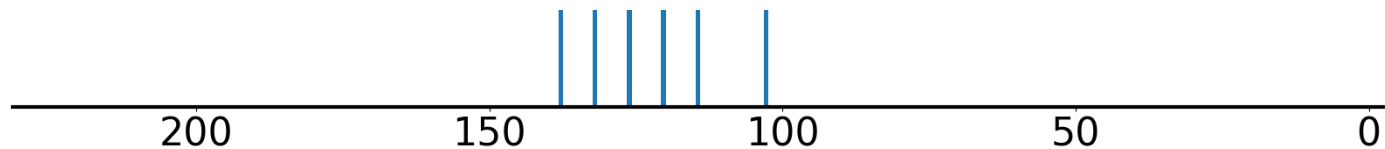

Experimental <sup>1</sup>H NMR (solvent: D<sub>2</sub>O)

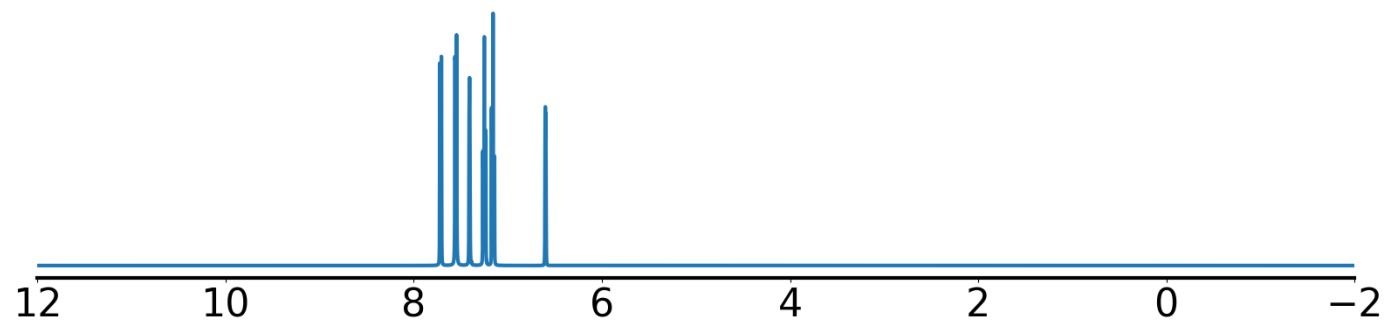

Top predicted structures (loss):

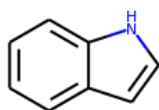

0.008669

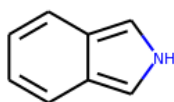

0.013965

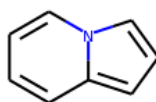

0.015204

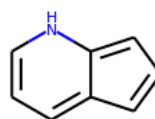

0.021481

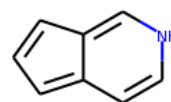

0.02677

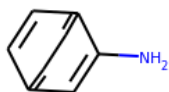

0.030027

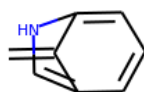

0.033928

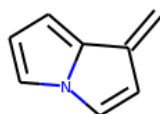

0.034423

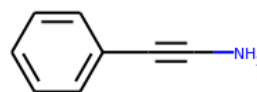

0.03612

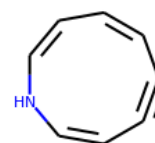

0.037248

| Top predicted substructures | prob        |                                           |             |
|-----------------------------|-------------|-------------------------------------------|-------------|
| [#6H1]                      | 1.0         | [#6X3H1][#6X3H0]                          | 0.997       |
| [#6X3][#6X3][#6X3][#6X3]    | 0.9996      | [cX3H1]([cX3H1])[cX3H0]                   | 0.9959      |
| [cH][cH]                    | 0.9995      | [#7][#6][#6][#6X3]                        | 0.9855      |
| [#6X3][#6X3]                | 0.9991      | [#6H1][#6H1]                              | 0.9757      |
| [cH]                        | 0.9982      | [cX3H1]([cX3H1])[cX3H1]                   | 0.9709      |
| <b>best positives</b>       | <b>prob</b> | <b>best negatives</b>                     | <b>prob</b> |
| [#6H1]                      | 1.0         | [#8][#6H1][#6H2][#6H1]=[#8]               | 0.0         |
| [#6X3][#6X3][#6X3][#6X3]    | 0.9996      | [OX2H0][CX4H2][CX4H1]([CX4H1])[CX4H3]     | 0.0         |
| [cH][cH]                    | 0.9995      | [CX4H0]([OX2H0])([CX4H3])([CX4H2])[CX4H1] | 0.0         |
| [#6X3][#6X3]                | 0.9991      | [OX2H0][CX4H2][CX4H2][CX4H1][OX2H0]       | 0.0         |
| [cH]                        | 0.9982      | [CX4H0]([OX2H1])([CX4H3])([CX4H2])[CX4H1] | 0.0         |
| [#6X3H1][#6X3H0]            | 0.997       | [CX4H1]([OX2H0])([CX4H3])[CX4H0]          | 0.0         |
| [cX3H1]([cX3H1])[cX3H0]     | 0.9959      | [OX2H0]1[CX4H2][CX4H2][CX4H1][CX4H1]1     | 0.0         |
| [#7][#6][#6][#6X3]          | 0.9855      | [OX2H0]1[CX4H2][CX4H1]1[CX4H1]            | 0.0         |
| [#6H1][#6H1]                | 0.9757      | [CX4H1]([CX4H3])([CX4H2])[CX4H0]          | 0.0         |
| [cX3H1]([cX3H1])[cX3H1]     | 0.9709      | [OX2H0][CX4H2][CX4H0][OX2H0]              | 0.0         |
| <b>worst negatives</b>      | <b>prob</b> | <b>worst positives</b>                    | <b>prob</b> |
| [#6]1[#6][#6][#6][#6][#7]1  | 0.4302      | [#7X3H1]                                  | 0.3501      |
| [#6X3H1][#7X3H0]            | 0.3404      | [#7H][#6X3H1]                             | 0.4439      |
| [#7X3H0]                    | 0.2446      | [cX3H1]([nX3H1])[cX3H1]                   | 0.5017      |
| [#6H1][#7][#6H1]            | 0.1904      | [#6X3][#7X3][#6X3]                        | 0.6953      |
| [cX3H1]([nX3H1])[cX3H0]     | 0.1673      | [#7][#6H0][#6H1]                          | 0.7286      |
| [#8][#6][#6][#6X3]          | 0.1434      | [#6H1r5][#7]                              | 0.729       |
| [CX3H1](=[CX3H1])[cX3H0]    | 0.1274      | [#7][#6X3H0][#6X3H1]                      | 0.7353      |
| [#7][#6][#6][#6X3]          | 0.1197      | [#6]1[#6][#6][#6][#7]1                    | 0.7535      |
| [#7X3H2]                    | 0.1181      | [#6]1[#6][#6][#6][#6][#6]1                | 0.7983      |
| [cX3H1]([nX3H0])[cX3H1]     | 0.0999      | [#6X3][#7][#6X3]                          | 0.8553      |

---

Example 89 true smiles: N#CC1CCCCC1 formula: C8H7N  
Index of correct structure: 0 of 2370  
True structure loss: 0.010376  
True structure:

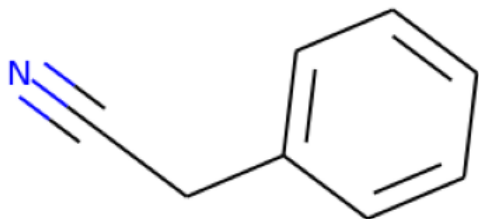

Experimental <sup>13</sup>C NMR (solvent: CDCl<sub>3</sub>)

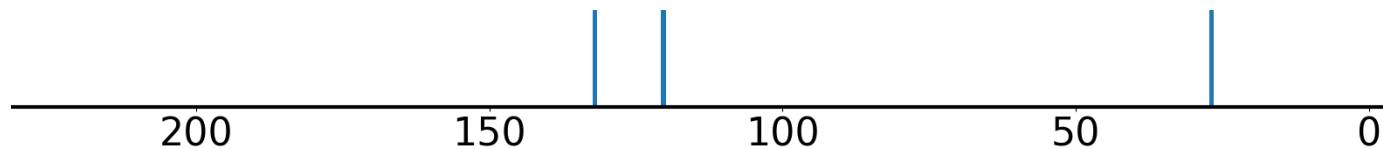

Experimental <sup>1</sup>H NMR (solvent: CDCl<sub>3</sub>)

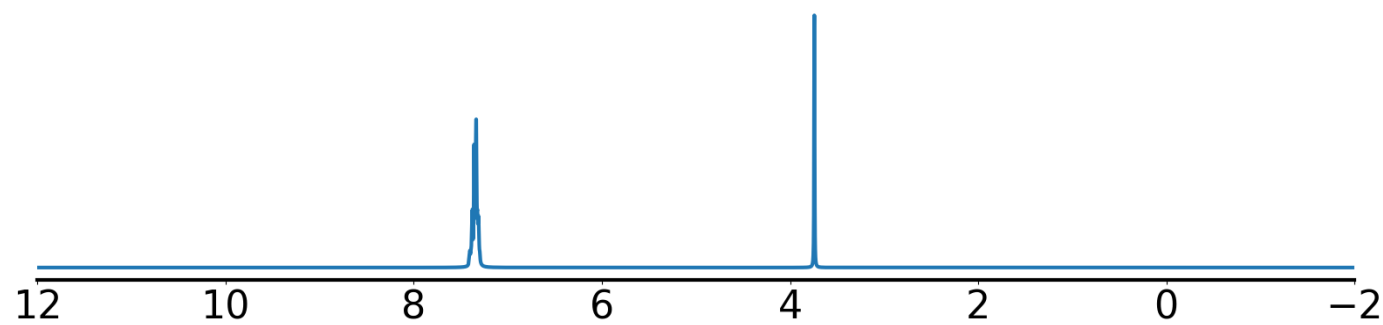

Top predicted structures (loss):

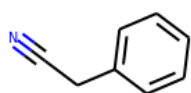

0.010376

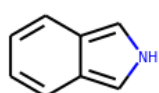

0.037804

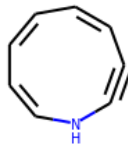

0.038478

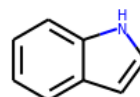

0.038617

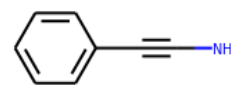

0.039793

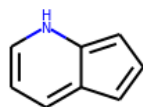

0.042286

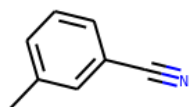

0.042591

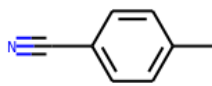

0.04324

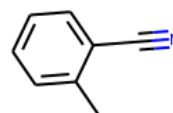

0.043593

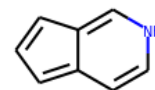

0.044861

| Top predicted substructures      | prob   |                                       |        |
|----------------------------------|--------|---------------------------------------|--------|
| [#6H1]                           | 0.9911 | [#7]#[#6]#[#6]#[#6X3]                 | 0.8348 |
| [#6X3]#[#6X3]                    | 0.974  | [#6]#[#7]                             | 0.8272 |
| [cH]                             | 0.9498 | [#6X3]#[#6X3]#[#6X3]#[#6X3]           | 0.8072 |
| [#6H1]#[#6H1]                    | 0.8974 | [cX3H1]([cX3H1])[cX3H0]               | 0.7411 |
| [cH][cH]                         | 0.8905 | [#6X3H1]#[#6X3H0]                     | 0.7025 |
| best positives                   | prob   | best negatives                        | prob   |
| [#6H1]                           | 0.9911 | [OX2H0]1[CX4H2][CX4H2][CX4H1][CX4H1]1 | 0.0    |
| [#6X3]#[#6X3]                    | 0.974  | [OX2H1][CX4H0][CX4H2][CX4H0]          | 0.0    |
| [cH]                             | 0.9498 | [OX2H1][CX4H2][CX4H1]([OX2H0])[CX4H1] | 0.0    |
| [#6H1]#[#6H1]                    | 0.8974 | [OX2H0][CX4H2][CX4H2][CX4H1][OX2H0]   | 0.0    |
| [cH][cH]                         | 0.8905 | [#8]#[#6H1]#[#6H2]#[#6H1]=[#8]        | 0.0    |
| [#7]#[#6]#[#6]#[#6X3]            | 0.8348 | [OX2H0][CX4H2][CX4H0][OX2H0]          | 0.0    |
| [#6]#[#7]                        | 0.8272 | [OX2H0r5][CX4H2][OX2H0r5]             | 0.0    |
| [#6X3]#[#6X3]#[#6X3]#[#6X3]      | 0.8072 | [OX2H0]1[CX4H2][CX4H1][CX4H1]1        | 0.0    |
| [cX3H1]([cX3H1])[cX3H0]          | 0.7411 | [OX2H0][CX4H2][CX4H2][OX2H0]          | 0.0    |
| [#6X3H1]#[#6X3H0]                | 0.7025 | [OX2H0][CX4H2][CX4H1]([CX4H1])[CX4H3] | 0.0    |
| worst negatives                  | prob   | worst positives                       | prob   |
| [#6X3]#[#7]#[#6X3]               | 0.3284 | [#6X3H1]#[#6X3H1]#[#6X3H0]#[#6X3H1]   | 0.4732 |
| [#7]#[#6]#[#6]#[#6X3]            | 0.2673 | [CX2H0][CX4H2]#[#6X3H0]               | 0.5449 |
| [CHX3]=[CHX3]                    | 0.2171 | [CX2H0]([#6X3H1])[CX4H2]              | 0.551  |
| [#7]#[#6]#[#6X3]                 | 0.2057 | [CX4H2]([#6]#[#6])                    | 0.5849 |
| [CX4H2][CX4H2]                   | 0.1484 | [#6]1#[#6]#[#6]#[#6]#[#6]1            | 0.5978 |
| [#6X3]#[#7X3]#[#6X3]             | 0.1366 | [cX3H1]([cX3H1])[cX3H1]               | 0.6208 |
| [#6H3]#[#6]#[#6X3]               | 0.1208 | [#6H2]#[#6X2]                         | 0.6864 |
| [#7]#[#6X3H0]#[#6X3H1]           | 0.1195 | [#6X3H1]#[#6X3H0]                     | 0.7025 |
| [cX3H0]([cX3H1])([cX3H0])[CX4H2] | 0.1184 | [cX3H1]([cX3H1])[cX3H0]               | 0.7411 |
| [CX4H2]([CX4H2])[cX3H0]          | 0.1108 | [#6X3]#[#6X3]#[#6X3]#[#6X3]           | 0.8072 |

---

Example 90 true smiles: c1ccc2[nH]ccc2c1 formula: C8H7N  
Index of correct structure: 0 of 2370  
True structure loss: 0.015342  
True structure:



Experimental  $^{13}\text{C}$  NMR (solvent:  $\text{CDCl}_3$ )



Experimental  $^1\text{H}$  NMR (solvent:  $\text{D}_2\text{O}$ )

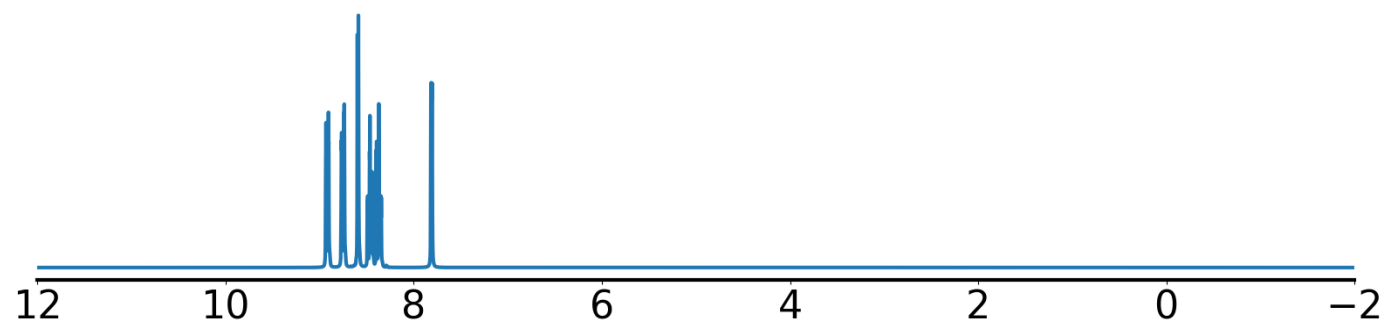

Top predicted structures (loss):

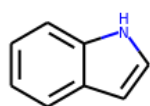

0.015342

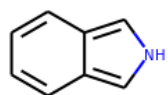

0.016765

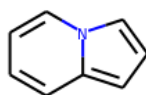

0.024085

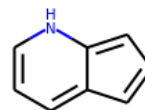

0.02584

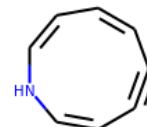

0.02696

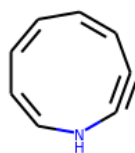

0.026964

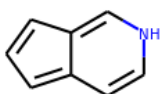

0.027941

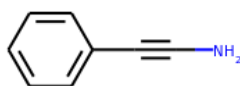

0.03207

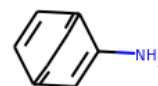

0.035016

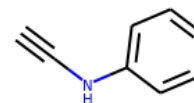

0.042892

|                                  |        |                                           |        |
|----------------------------------|--------|-------------------------------------------|--------|
| Top predicted substructures      | prob   |                                           |        |
| [#6H1]                           | 1.0    | [#6H1][#6H1]                              | 0.9744 |
| [cH][cH]                         | 0.9982 | [cX3H1]([cX3H1])[cX3H1]                   | 0.9553 |
| [#6X3][#6X3]                     | 0.9977 | [#7][#6][#6][#6X3]                        | 0.9436 |
| [#6X3][#6X3][#6X3][#6X3]         | 0.9976 | [#6X3H1][#6X3H1][#6X3H0][#6X3H1]          | 0.935  |
| [cH]                             | 0.9952 | [cX3H1]([cX3H1])[cX3H0]                   | 0.9074 |
| best positives                   | prob   | best negatives                            | prob   |
| [#6H1]                           | 1.0    | [OX2H0][CX4H2][CX4H1]([CX4H1])[CX4H3]     | 0.0    |
| [cH][cH]                         | 0.9982 | [OX2H0][CX4H2][CX4H2][CX4H1][OX2H0]       | 0.0    |
| [#6X3][#6X3]                     | 0.9977 | [OX2H0][CX4H2][CX4H1]([CX4H1])[CX4H1]     | 0.0    |
| [#6X3][#6X3][#6X3][#6X3]         | 0.9976 | [CX4H0]([OX2H0])([CX4H3])([CX4H2])[CX4H1] | 0.0    |
| [cH]                             | 0.9952 | [OX2H0]1[CX4H2][CX4H2][CX4H1][CX4H1]1     | 0.0    |
| [#6H1][#6H1]                     | 0.9744 | [OX2H1][CX4H1][CX4H1]([CX4H1])[CX4H1]     | 0.0    |
| [cX3H1]([cX3H1])[cX3H1]          | 0.9553 | [OX2H0]1[CX4H2][CX4H2][CX4H0]1            | 0.0    |
| [#7][#6][#6][#6X3]               | 0.9436 | [CX4H0]([OX2H0])([CX4H3])([CX4H2])[CX4H2] | 0.0    |
| [#6X3H1][#6X3H1][#6X3H0][#6X3H1] | 0.935  | [OX2H1][CX4H1]1[CX4H1][CX4H2][CX4H1]1     | 0.0    |
| [cX3H1]([cX3H1])[cX3H0]          | 0.9074 | [OX2H1][CX4H0][CX4H1]([CX4H2])[CX4H1]     | 0.0    |
| worst negatives                  | prob   | worst positives                           | prob   |
| [#6]1[#6][#6][#6][#6][#7]1       | 0.519  | [#7X3H1]                                  | 0.1423 |
| [#6H1][#7][#6H1]                 | 0.3843 | [#6]1[#6][#6][#6][#6][#6]1                | 0.265  |
| [cX3H1]([nX2H0])[cX3H1]          | 0.3199 | [#6X3][#7X3][#6X3]                        | 0.2913 |
| [#8][#6H0][#6H1]                 | 0.1613 | [#6]1[#6][#6][#6][#7]1                    | 0.2929 |
| [CHX3]=[CHX3]                    | 0.1012 | [#7H][#6X3H1]                             | 0.2982 |
| [cX3H1]([nX3H1])[cX3H0]          | 0.0932 | [cX3H1]([nX3H1])[cX3H1]                   | 0.3431 |
| [#6X3]=[#6X3][#6X3]=[#6X3]       | 0.073  | [#7][#6H0][#6H1]                          | 0.3842 |
| [cX3H1]([nX3H0])[cX3H1]          | 0.0708 | [#7][#6X3H0][#6X3H1]                      | 0.4345 |
| [#7H2][#6H0]                     | 0.0694 | [#6H1r5][#7]                              | 0.4396 |
| [#8][#6][#6][#6X3]               | 0.0646 | [#6X3][#7][#6X3]                          | 0.7965 |

---

Example 91 true smiles: COCCOCC(=O)O formula: C5H10O4  
Index of correct structure: 0 of 1865  
True structure loss: 0.026528  
True structure:

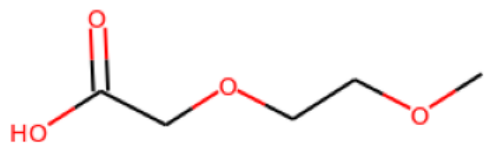

Experimental <sup>13</sup>C NMR (solvent: CDCl<sub>3</sub>)

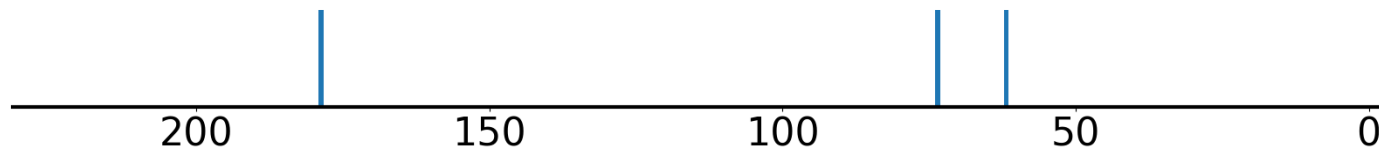

Experimental <sup>1</sup>H NMR (solvent: CDCl<sub>3</sub>)

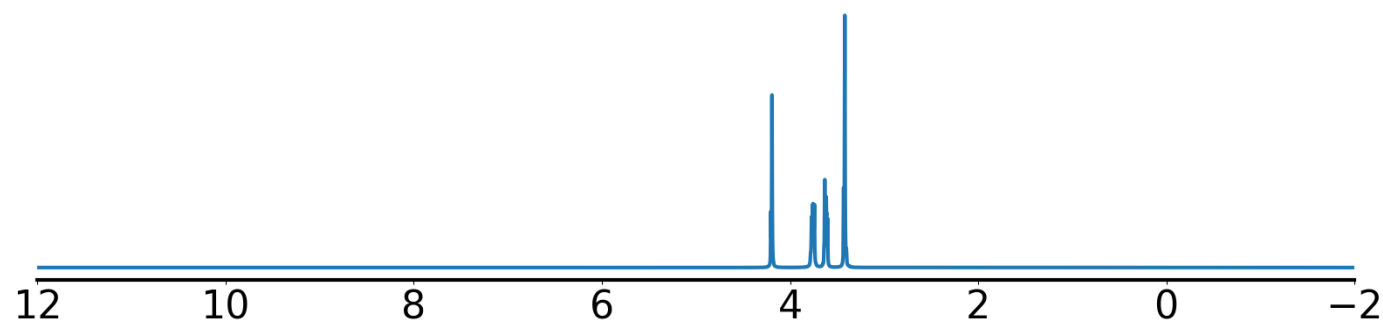

Top predicted structures (loss):

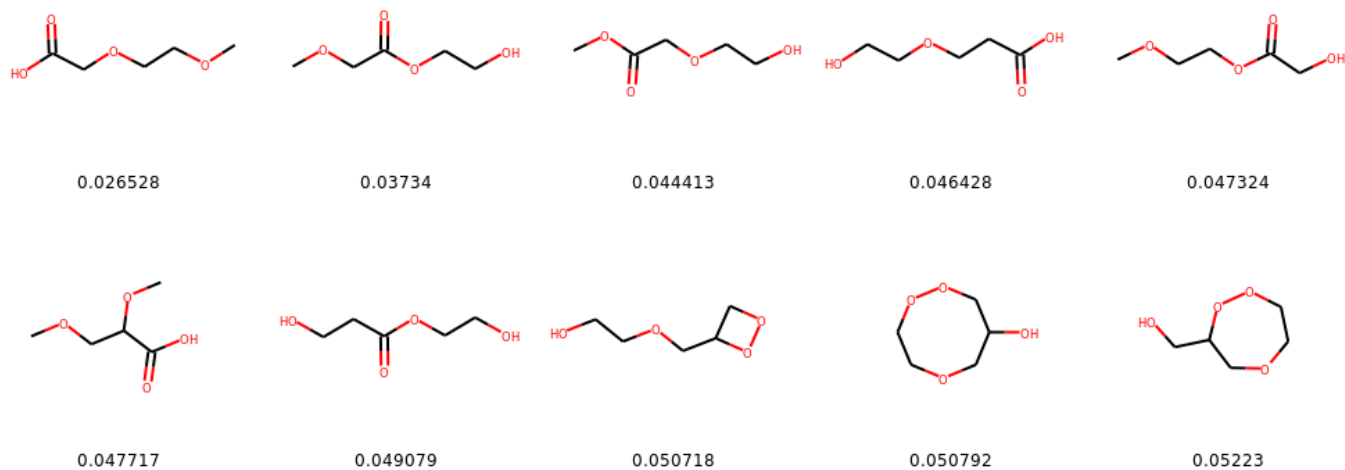



|                                   |        |                                   |        |
|-----------------------------------|--------|-----------------------------------|--------|
| Top predicted substructures       | prob   |                                   |        |
| [CX4H2]([#6])[O]                  | 0.9939 | [OX2H1]                           | 0.9492 |
| [CX3](=[OX1])C                    | 0.9898 | [#8]=[#6][#8]                     | 0.9316 |
| [#8][#6][#6H2]                    | 0.9656 | [#8][#6][#6][#8]                  | 0.8986 |
| [#8][#6][#6H2][#8]                | 0.9514 | [#8][#6][#6]=[#8]                 | 0.825  |
| [CX3](=[OX1])O                    | 0.9505 | [OX2H0][CX4H2][CX4H2][OX2H0]      | 0.8082 |
| best positives                    | prob   | best negatives                    | prob   |
| [CX4H2]([#6])[O]                  | 0.9939 | [#6X2][#6H1][#6X2]                | 0.0    |
| [CX3](=[OX1])C                    | 0.9898 | [CX2H1][#CX2H0][CX3H1]=[CX3H0]    | 0.0    |
| [#8][#6][#6H2]                    | 0.9656 | [#7][#6][#6][#7]                  | 0.0    |
| [#8][#6][#6H2][#8]                | 0.9514 | CC=CC#C                           | 0.0    |
| [CX3](=[OX1])O                    | 0.9505 | C=CC=CC#C                         | 0.0    |
| [OX2H1]                           | 0.9492 | [CX2H0](#[CX2H0])[CX3H0]          | 0.0    |
| [#8]=[#6][#8]                     | 0.9316 | [#7][#6H1][#6X2]                  | 0.0    |
| [#8][#6][#6][#8]                  | 0.8986 | [CX3H0](=[CX3H1])([CX4H1])[CX2H0] | 0.0    |
| [#8][#6][#6]=[#8]                 | 0.825  | [CX3H1](=[CX3H1])[CX2H0]          | 0.0    |
| [OX2H0][CX4H2][CX4H2][OX2H0]      | 0.8082 | [#6X3][#6][#6][#6H3]              | 0.0    |
| worst negatives                   | prob   | worst positives                   | prob   |
| [#6H1]                            | 0.7644 | [CX3H0](=[OX1H0])([OX2H1])[CX4H2] | 0.2785 |
| [CX4H](O)CO                       | 0.7529 | [OX2H0][CX4H2][#6H0]              | 0.3665 |
| OCC[CH2]                          | 0.6905 | [CX4H3][OX2H0][CX4H2]             | 0.3847 |
| [CX3H0](=[OX1H0])([OX2H1])[CX4H1] | 0.6822 | [CX4H2][OX2H0][CX4H2]             | 0.4226 |
| [#6H1][#6H2]                      | 0.5431 | [CX4H3]                           | 0.465  |
| [CX4H2]CC=O                       | 0.5052 | [OX1H0]=[CX3H0]([#8])[CX4H2]      | 0.4731 |
| O[CX4H][CX4H2]                    | 0.4774 | [CX4H3][OX2H0]                    | 0.5149 |
| [CX4H2](O)[CHX4]                  | 0.447  | [CX4H2]( [OX2H0] ) [CX4H2]        | 0.5459 |
| [#8]=[#6H0][#6H1]                 | 0.4139 | [#8]=[#6][#6H2][#8]               | 0.5688 |
| O=[CX3][CX4H]                     | 0.3913 | [CX4H2][CX3]=O                    | 0.5734 |

---

Example 92 true smiles: Cc1cccc(N)c1 formula: C7H9N  
Index of correct structure: 0 of 1755  
True structure loss: 0.01404  
True structure:

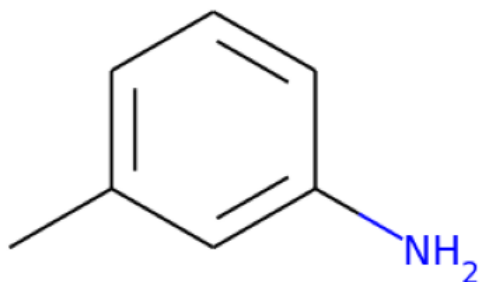

Experimental  $^{13}\text{C}$  NMR (solvent:  $\text{CDCl}_3$ )

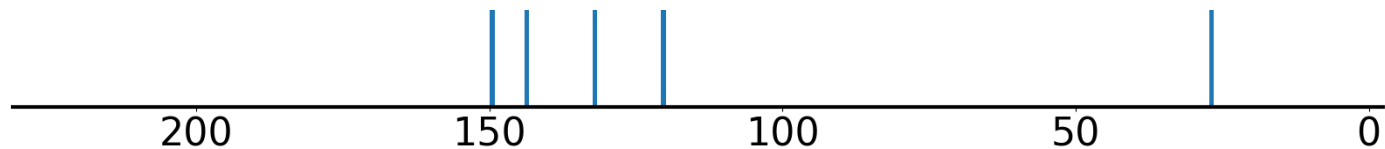

Experimental  $^1\text{H}$  NMR (solvent:  $\text{CDCl}_3$ )

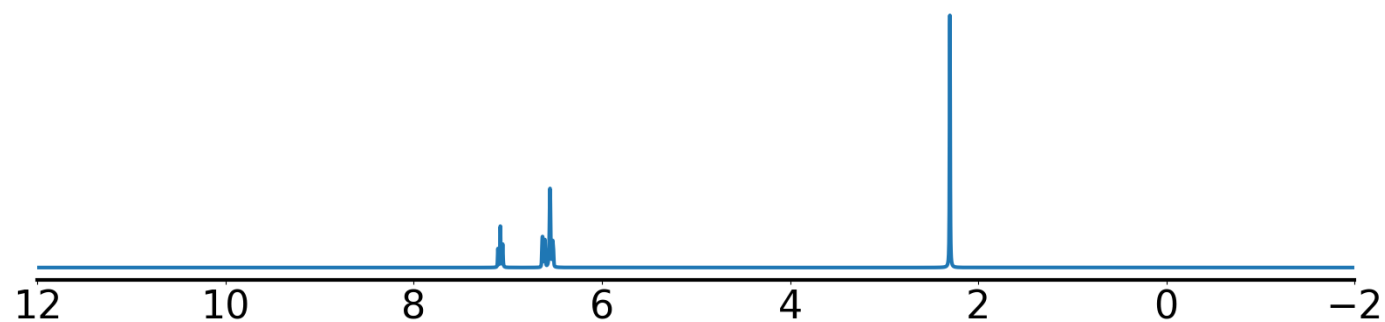

Top predicted structures (loss):

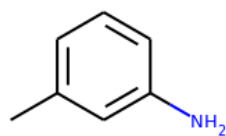

0.01404

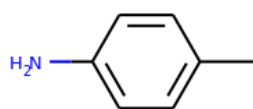

0.014554

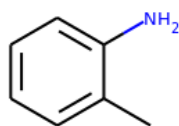

0.016638

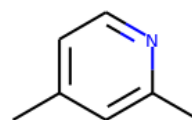

0.01955

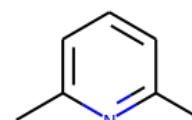

0.020187

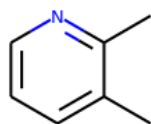

0.026088

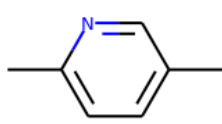

0.026829

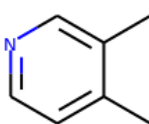

0.038456

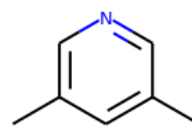

0.039593

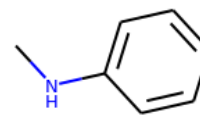

0.041978

| Top predicted substructures  | prob   |                                        |        |
|------------------------------|--------|----------------------------------------|--------|
| [#6H1]                       | 0.9981 | [#6H3][#6H0]                           | 0.9376 |
| [#6X3][#6X3]                 | 0.9977 | [cX3H1]([cX3H1])[cX3H0]                | 0.9155 |
| [cH][cH]                     | 0.9839 | [#7][#6][#6X3]                         | 0.9146 |
| [#6X3][#6X3][#6X3][#6X3]     | 0.9803 | [#6H1][#6H1]                           | 0.9016 |
| [#6X3H1][#6X3H0]             | 0.9448 | [#7][#6][#6][#6X3]                     | 0.8958 |
| best positives               | prob   | best negatives                         | prob   |
| [#6H1]                       | 0.9981 | [OX1H0]=[cX3H0]1[cX4H1][cX4H1][cX4H2]1 | 0.0    |
| [#6X3][#6X3]                 | 0.9977 | [OX2H0]1[cX4H2][cX4H2][cX4H1][cX4H1]1  | 0.0    |
| [cH][cH]                     | 0.9839 | [#8][#6H1][#6H2][#6H1]=[#8]            | 0.0    |
| [#6X3][#6X3][#6X3][#6X3]     | 0.9803 | [OX2H1][cX4H1]1[cX4H1][cX4H2][cX4H1]1  | 0.0    |
| [#6X3H1][#6X3H0]             | 0.9448 | [OX2H1][cX4H1][cX4H1]([cX4H1])[cX4H1]  | 0.0    |
| [#6H3][#6H0]                 | 0.9376 | [OX2H0][cX4H2][cX4H2][cX4H1][OX2H0]    | 0.0    |
| [cX3H1]([cX3H1])[cX3H0]      | 0.9155 | [OX2H0][cX4H2][cX4H0][OX2H0]           | 0.0    |
| [#7][#6][#6X3]               | 0.9146 | [OX2H0]1[cX4H2][cX4H1]1[cX4H1]         | 0.0    |
| [#6H1][#6H1]                 | 0.9016 | [OX2H0]1[cX4H2][cX4H1][cX4H1]1         | 0.0    |
| [#7][#6][#6][#6X3]           | 0.8958 | [OX2H1][cX4H2][cX4H1]([OX2H0])[cX4H1]  | 0.0    |
| worst negatives              | prob   | worst positives                        | prob   |
| [#6]1[#6][#6][#6][#6][#7]1   | 0.403  | [cX3H1]([cX3H0])[cX3H0]                | 0.133  |
| [CHX3](=C)C                  | 0.392  | [#7H2][#6H0]                           | 0.2834 |
| [#6X3][#7][#6X3]             | 0.3811 | [#7][#6H0][#6H1]                       | 0.4359 |
| [#7X3H1]                     | 0.2731 | [#7X3H2]                               | 0.491  |
| [cX4H2]([#6])[#6]            | 0.1712 | [#7][#6X3H0][#6X3H1]                   | 0.5626 |
| [#7][#6][#6H3]               | 0.1604 | [#6X3][#6][#6][#6H3]                   | 0.6209 |
| [cX3H0][cX3H1][cX3H1][cX3H0] | 0.1428 | [cX3H1]([cX3H1])[cX3H1]                | 0.6398 |
| [#6X3]=[#6X3][#6X3]=[#6X3]   | 0.1392 | [#6]1[#6][#6][#6][#6][#6]1             | 0.7191 |
| [CHX3]=[CHX3]                | 0.1351 | [#6X3H1][#6X3H1][#6X3H0][#6X3H1]       | 0.8029 |
| [cX4H2][cX3H]                | 0.1084 | [cX4H3][#6]                            | 0.8394 |

---

Example 93 true smiles: Cc1cccc1N formula: C7H9N  
Index of correct structure: 0 of 1755  
True structure loss: 0.015657  
True structure:

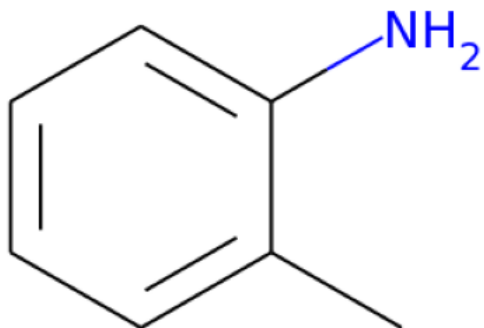

Experimental <sup>13</sup>C NMR (solvent: CDCl<sub>3</sub>)

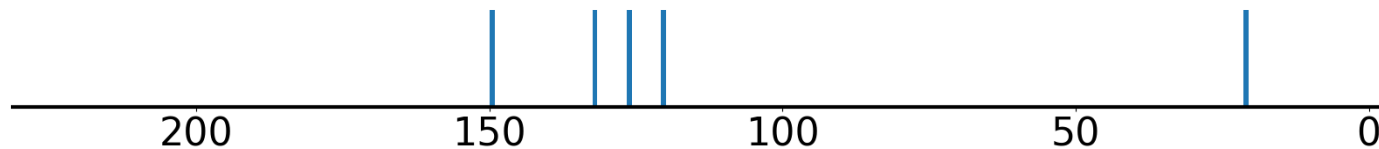

Experimental <sup>1</sup>H NMR (solvent: CDCl<sub>3</sub>)

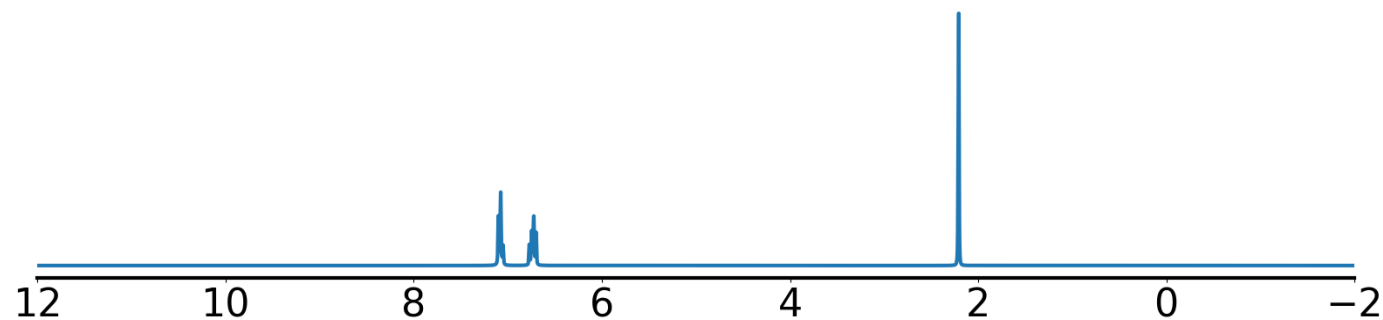

Top predicted structures (loss):

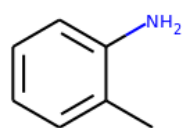

0.015657

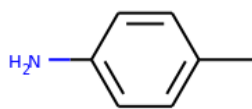

0.018607

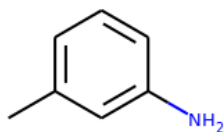

0.019227

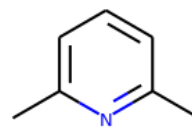

0.027272

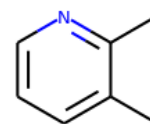

0.029253

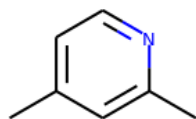

0.029578

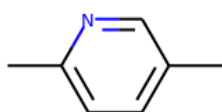

0.034941

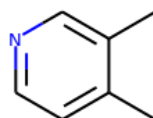

0.039918

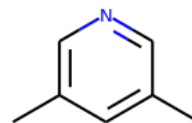

0.04112

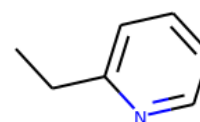

0.048189

| Top predicted substructures      | prob        |                                        |             |
|----------------------------------|-------------|----------------------------------------|-------------|
| [#6X3][#6X3]                     | 0.9979      | [#6X3][#6X3][#6X3][#6X3]               | 0.9424      |
| [#6H1]                           | 0.9962      | [#6H3][#6][#6]                         | 0.9326      |
| [CX4H3][#6]                      | 0.9958      | [#6H3][#6H0]                           | 0.8925      |
| [CX4H3]                          | 0.9887      | [#6X3H1][#6X3H0]                       | 0.8825      |
| [cH][cH]                         | 0.9576      | [#6]1[#6][#6][#6][#6][#6]1             | 0.8556      |
| <b>best positives</b>            | <b>prob</b> | <b>best negatives</b>                  | <b>prob</b> |
| [#6X3][#6X3]                     | 0.9979      | [#8][#6H1][#6H2][#6H1]=[#8]            | 0.0         |
| [#6H1]                           | 0.9962      | [OX1H0]=[CX3H0]1[CX4H1][CX4H1][CX4H2]1 | 0.0         |
| [CX4H3][#6]                      | 0.9958      | [OX2H0]1[CX4H2][CX4H2][CX4H1][CX4H1]1  | 0.0         |
| [CX4H3]                          | 0.9887      | [OX2H0]1[CX4H2][CX4H1][CX4H1]1         | 0.0         |
| [cH][cH]                         | 0.9576      | [OX2H0][CX4H2][CX4H0][OX2H0]           | 0.0         |
| [#6X3][#6X3][#6X3][#6X3]         | 0.9424      | [OX2H0]1[CX4H2][CX4H1]1[CX4H1]         | 0.0         |
| [#6H3][#6][#6]                   | 0.9326      | [OX2H1][CX4H1]1[CX4H1][CX4H2][CX4H1]1  | 0.0         |
| [#6H3][#6H0]                     | 0.8925      | [#6]1[#8][#6][#6]1=[#8]                | 0.0         |
| [#6X3H1][#6X3H0]                 | 0.8825      | [OX2H0][CX4H2][CX4H1]([CX4H1])[CX4H3]  | 0.0         |
| [#6]1[#6][#6][#6][#6][#6]1       | 0.8556      | [OX2H1][CX4H2][CX4H1]([OX2H0])[CX4H1]  | 0.0         |
| <b>worst negatives</b>           | <b>prob</b> | <b>worst positives</b>                 | <b>prob</b> |
| [#6X3H1][#6X3H1][#6X3H0][#6X3H1] | 0.3797      | [#7H2][#6H0]                           | 0.1473      |
| [CHX3](=C)C                      | 0.324       | [#7][#6H0][#6H1]                       | 0.3268      |
| [#6X3][#7][#6X3]                 | 0.322       | [#7X3H2]                               | 0.4268      |
| [#6H3][#6]=[#6X3]                | 0.2535      | [cX3H0]([cX3H1])([cX3H0])[CX4H3]       | 0.431       |
| [CHX3]=[CHX3]                    | 0.2174      | [#7][#6X3H0][#6X3H1]                   | 0.4638      |
| [#7H][#6X3H1]                    | 0.2059      | [#6X3][#6][#6][#6H3]                   | 0.5048      |
| [#6X3][#6]=[#6][#6H3]            | 0.1997      | [#7][#6][#6X3]                         | 0.5873      |
| [#6]1[#6][#6][#6][#6][#7]1       | 0.1941      | [cX3H1]([cX3H1])[cX3H1]                | 0.5915      |
| [CX4H2][CX3]=C                   | 0.1888      | [CX4H3][cX3H0]                         | 0.6959      |
| [#7X3H1]                         | 0.1866      | [#6H3][#6][#6X3]                       | 0.744       |

---

Example 94 true smiles: CNc1ccccc1 formula: C7H9N  
Index of correct structure: 0 of 1755  
True structure loss: 0.009893  
True structure:

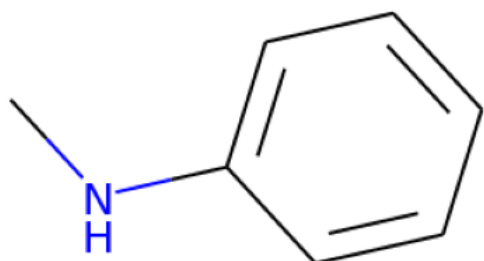

Experimental <sup>13</sup>C NMR (solvent: CDCl<sub>3</sub>)

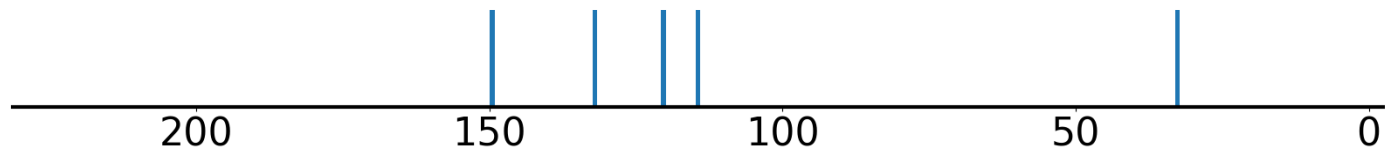

Experimental <sup>1</sup>H NMR (solvent: CDCl<sub>3</sub>)

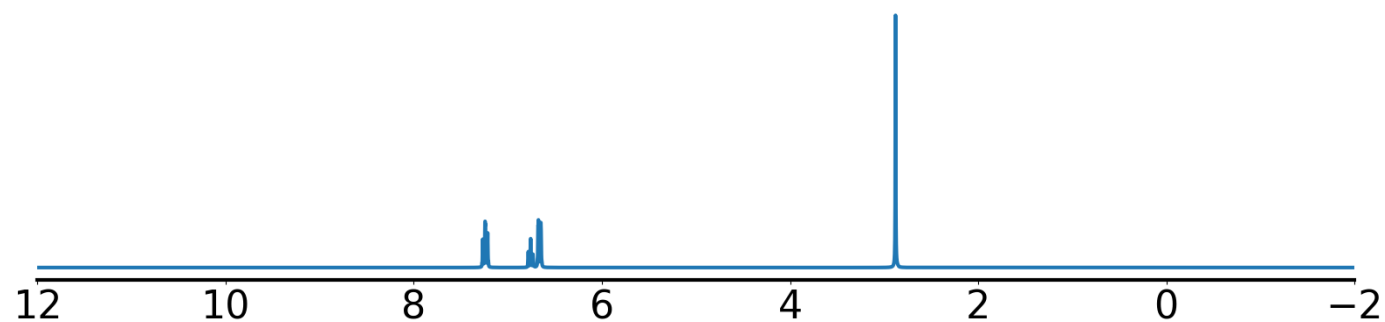

Top predicted structures (loss):

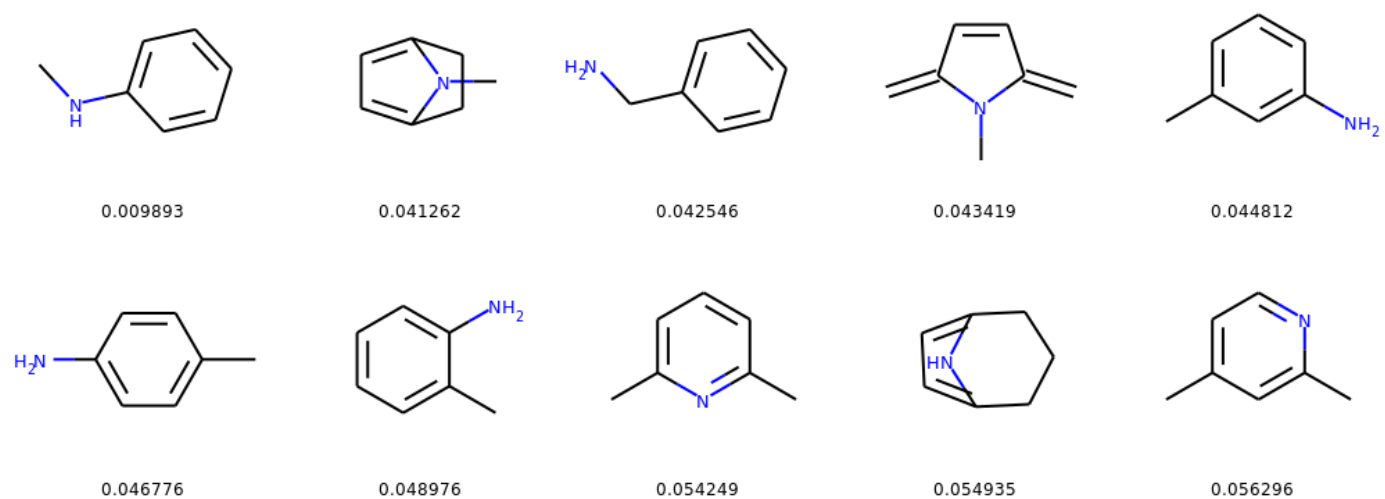

|                             |        |                                           |        |
|-----------------------------|--------|-------------------------------------------|--------|
| Top predicted substructures | prob   |                                           |        |
| [#6H1]                      | 0.9997 | [cH]                                      | 0.9739 |
| [#6X3][#6X3][#6X3][#6X3]    | 0.9949 | [cX3H1]([cX3H1])[cX3H0]                   | 0.9728 |
| [#6X3][#6X3]                | 0.9933 | [#7][#6][#6X3]                            | 0.9542 |
| [cH][cH]                    | 0.9899 | [cX3H1]([cX3H1])[cX3H1]                   | 0.9153 |
| [#6X3H1][#6X3H0]            | 0.9763 | [#6H3][#7]                                | 0.8853 |
| best positives              | prob   | best negatives                            | prob   |
| [#6H1]                      | 0.9997 | [OX2H0]1[CX4H2][CX4H2][CX4H1][CX4H1]1     | 0.0    |
| [#6X3][#6X3][#6X3][#6X3]    | 0.9949 | [#8][#6H1][#6H2][#6H1]=[#8]               | 0.0    |
| [#6X3][#6X3]                | 0.9933 | [CX4H0]([OX2H1])([CX4H3])([CX4H2])[CX4H1] | 0.0    |
| [cH][cH]                    | 0.9899 | [OX2H1][CX4H1][CX4H1]([CX4H1])[CX4H1]     | 0.0    |
| [#6X3H1][#6X3H0]            | 0.9763 | [OX2H0]1[CX4H2][CX4H1][CX4H1]1            | 0.0    |
| [cH]                        | 0.9739 | [OX1H0]=[CX3H0]1[CX4H1][CX4H1][CX4H2]1    | 0.0    |
| [cX3H1]([cX3H1])[cX3H0]     | 0.9728 | [#6]1[#8][#6][#6]1=[#8]                   | 0.0    |
| [#7][#6][#6X3]              | 0.9542 | [CX4H1]([OX2H0])([CX4H3])[CX4H0]          | 0.0    |
| [cX3H1]([cX3H1])[cX3H1]     | 0.9153 | [OX2H0][CX4H2][CX4H0][OX2H0]              | 0.0    |
| [#6H3][#7]                  | 0.8853 | [OX2H0][CX4H2][CX4H1]([CX4H1])[CX4H3]     | 0.0    |
| worst negatives             | prob   | worst positives                           | prob   |
| [#6X3][#7][#6X3]            | 0.5759 | [CX4H3][NX3H1]                            | 0.4815 |
| [#6]1[#6][#6][#6][#6][#7]1  | 0.474  | [#7X3H1]                                  | 0.5255 |
| [#6X3][#7X3][#6X3]          | 0.2969 | [#7][#6X3H0][#6X3H1]                      | 0.6407 |
| [#6H1r5][#7]                | 0.2498 | [#7][#6H0][#6H1]                          | 0.715  |
| [#7H][#6X3H1]               | 0.2331 | [#6H3][#7][#6X3]                          | 0.7178 |
| [#6]1[#6][#6][#6][#7]1      | 0.1981 | [#6X3H1][#6X3H1][#6X3H0][#6X3H1]          | 0.7768 |
| [#6X3][#6H2][#6X3]          | 0.1453 | [CX4H3]                                   | 0.8312 |
| [#7X3H2]                    | 0.1385 | [#6]1[#6][#6][#6][#6][#6]1                | 0.855  |
| [CX4H2]([#6])[#6]           | 0.138  | [#7][#6][#6][#6X3]                        | 0.8725 |
| [#6H3][#6][#6X3]            | 0.1187 | [#6H1][#6H1]                              | 0.878  |

---

Example 95 true smiles: Cc1ccnc(C)c1 formula: C7H9N  
Index of correct structure: 0 of 1755  
True structure loss: 0.013298  
True structure:

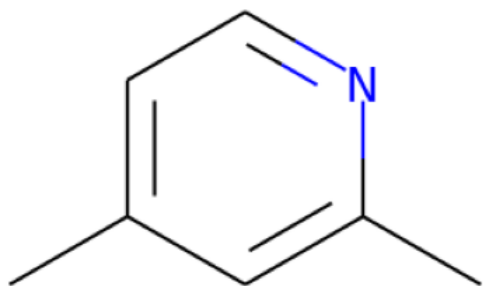

Experimental <sup>13</sup>C NMR (solvent: CDCl<sub>3</sub>)

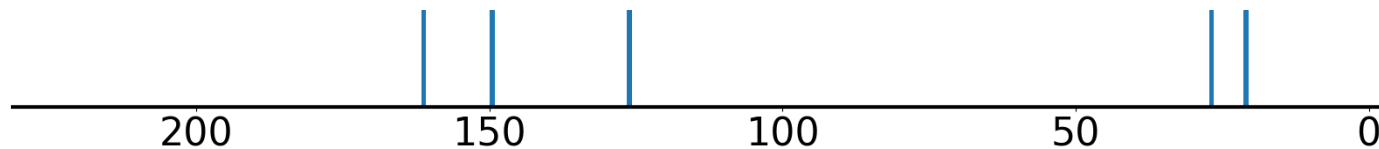

Experimental <sup>1</sup>H NMR (solvent: CDCl<sub>3</sub>)

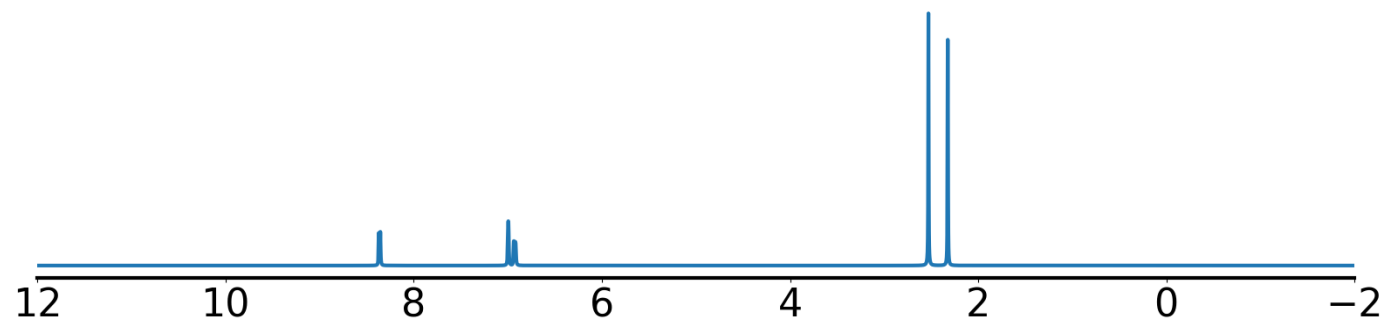

Top predicted structures (loss):

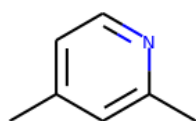

0.013298

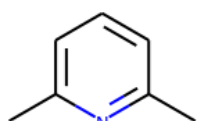

0.015574

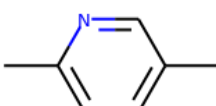

0.016487

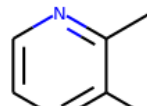

0.017267

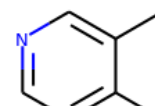

0.022711

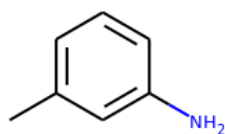

0.02455

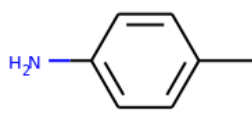

0.024582

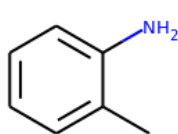

0.024994

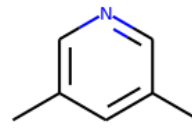

0.028351

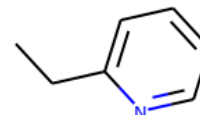

0.038191



|                                  |        |                                        |        |
|----------------------------------|--------|----------------------------------------|--------|
| Top predicted substructures      | prob   |                                        |        |
| [#6X3][#6X3]                     | 0.9933 | [#6H3][#6H0]                           | 0.9868 |
| [#6H3][#6][#6]                   | 0.9932 | [cH][cH]                               | 0.9862 |
| [#6H1]                           | 0.993  | [CX4H3][cX3H0]                         | 0.9798 |
| [CX4H3]                          | 0.9926 | [CX4H3][#6]                            | 0.9668 |
| [#6X3][#6X3][#6X3][#6X3]         | 0.9925 | [#6X3][#6][#6][#6H3]                   | 0.9488 |
| best positives                   | prob   | best negatives                         | prob   |
| [#6X3][#6X3]                     | 0.9933 | [#8][#6H1][#6H2][#6H1]=[#8]            | 0.0    |
| [#6H3][#6][#6]                   | 0.9932 | [OX2H0]1[CX4H2][CX4H2][CX4H1][CX4H1]1  | 0.0    |
| [#6H1]                           | 0.993  | [OX1H0]=[CX3H0]1[CX4H1][CX4H1][CX4H2]1 | 0.0    |
| [CX4H3]                          | 0.9926 | [OX2H0]1[CX4H2][CX4H1][CX4H1]1         | 0.0    |
| [#6X3][#6X3][#6X3][#6X3]         | 0.9925 | [OX2H0][CX4H2][CX4H0][OX2H0]           | 0.0    |
| [#6H3][#6H0]                     | 0.9868 | [OX2H1][CX4H2][CX4H1]([OX2H0])[CX4H1]  | 0.0    |
| [cH][cH]                         | 0.9862 | [OX2H0][CX4H2][CX4H2][CX4H1][OX2H0]    | 0.0    |
| [CX4H3][cX3H0]                   | 0.9798 | [OX2H0]1[CX4H2][CX4H2][CX4H0]1         | 0.0    |
| [CX4H3][#6]                      | 0.9668 | [#6]1[#8][#6][#6]1=[#8]                | 0.0    |
| [#6X3][#6][#6][#6H3]             | 0.9488 | [OX2H1][CX4H1][CX4H1]([CX4H1])[CX4H1]  | 0.0    |
| worst negatives                  | prob   | worst positives                        | prob   |
| [CX4H2]([#6][#6])                | 0.6798 | [cX3H1]([cX3H0])[cX3H0]                | 0.237  |
| [CX4H2][CX4H2]                   | 0.6223 | [#7][#6H0][#6H1]                       | 0.3474 |
| [#6]1[#6][#6][#6][#6][#6]1       | 0.4063 | [cX3H1]([nX2H0])[cX3H1]                | 0.5246 |
| [cX3H1]([cX3H1])[cX3H1]          | 0.3669 | [#7][#6X3H0][#6X3H1]                   | 0.5552 |
| [cX3H1]([nX2H0])[cX3H0]          | 0.2575 | [#6X3H1][#6X3H1][#6X3H0][#6X3H1]       | 0.5771 |
| [cX3H0]([cX3H1])([cX3H0])[CX4H3] | 0.2169 | [#7][#6][#6H3]                         | 0.5941 |
| [#6H3][#6H0][#6H1][#7]           | 0.2112 | [#6X3][#7][#6X3]                       | 0.6808 |
| [#6H1][#6H2]                     | 0.1912 | [#6]1[#6][#6][#6][#6][#7]1             | 0.6813 |
| [cX3H0][cX3H1][cX3H1][cX3H0]     | 0.1486 | [#7][#6][#6X3]                         | 0.887  |
| [CX4H2]([CX4H2])[CX3H1]          | 0.1246 | [#6H1][#6H1]                           | 0.8948 |

---

Example 96 true smiles: Cc1ccc(N)cc1 formula: C7H9N  
Index of correct structure: 0 of 1755  
True structure loss: 0.012272  
True structure:

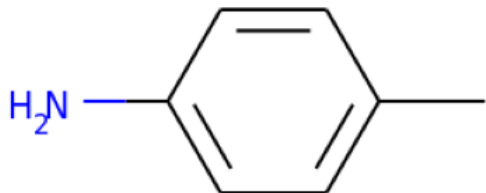

Experimental <sup>13</sup>C NMR (solvent: CDCl<sub>3</sub>)

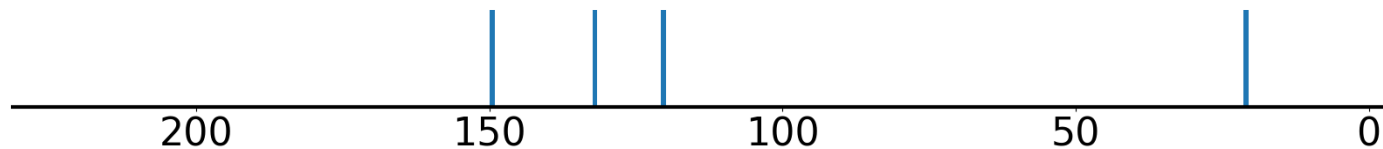

Experimental <sup>1</sup>H NMR (solvent: CDCl<sub>3</sub>)

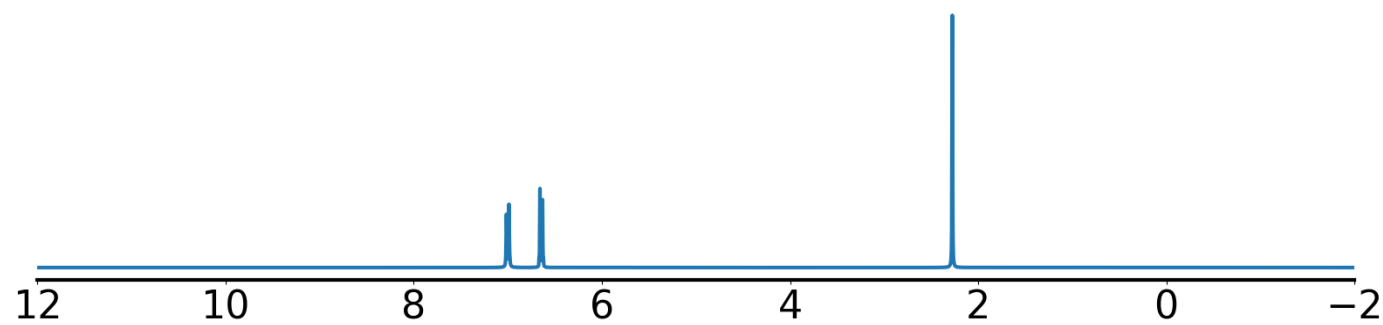

Top predicted structures (loss):

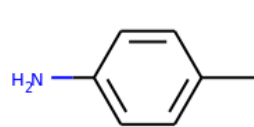

0.012272

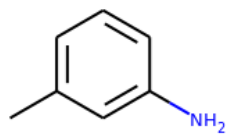

0.012897

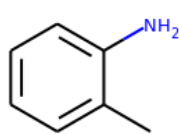

0.013551



0.021013

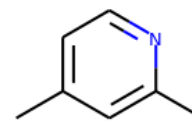

0.021516

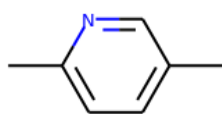

0.022322

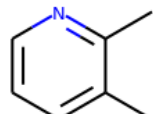

0.024314

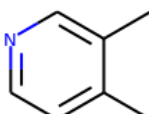

0.031965

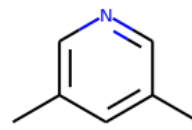

0.035487

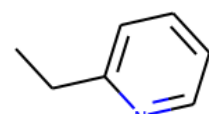

0.048218

| Top predicted substructures      | prob   |                                        |        |
|----------------------------------|--------|----------------------------------------|--------|
| [#6X3][#6X3]                     | 0.9963 | [cH][cH]                               | 0.9841 |
| [#6H1]                           | 0.9929 | [#6H3][#6H0]                           | 0.9714 |
| [CX4H3][#6]                      | 0.9899 | [#6H3][#6][#6]                         | 0.9517 |
| [#6X3][#6X3][#6X3][#6X3]         | 0.9894 | [#6X3H1][#6X3H0]                       | 0.9512 |
| [CX4H3]                          | 0.9874 | [cX3H1]([cX3H1])[cX3H0]                | 0.9414 |
| best positives                   | prob   | best negatives                         | prob   |
| [#6X3][#6X3]                     | 0.9963 | [#8][#6H1][#6H2][#6H1]=[#8]            | 0.0    |
| [#6H1]                           | 0.9929 | [OX2H0]1[CX4H2][CX4H2][CX4H1][CX4H1]1  | 0.0    |
| [CX4H3][#6]                      | 0.9899 | [OX1H0]=[CX3H0]1[CX4H1][CX4H1][CX4H2]1 | 0.0    |
| [#6X3][#6X3][#6X3][#6X3]         | 0.9894 | [OX2H0][CX4H2][CX4H2][CX4H1][OX2H0]    | 0.0    |
| [CX4H3]                          | 0.9874 | [OX2H1][CX4H2][CX4H1]([OX2H0])[CX4H1]  | 0.0    |
| [cH][cH]                         | 0.9841 | [OX2H0][CX4H2][CX4H0][OX2H0]           | 0.0    |
| [#6H3][#6H0]                     | 0.9714 | [OX2H0]1[CX4H2][CX4H1]1[CX4H1]         | 0.0    |
| [#6H3][#6][#6]                   | 0.9517 | [OX2H1][CX4H1]1[CX4H1][CX4H2][CX4H1]1  | 0.0    |
| [#6X3H1][#6X3H0]                 | 0.9512 | [OX2H0]1[CX4H2][CX4H1][CX4H1]1         | 0.0    |
| [cX3H1]([cX3H1])[cX3H0]          | 0.9414 | [CX3H0]([OX1H0])([OX2H0])[CX4H2]       | 0.0    |
| worst negatives                  | prob   | worst positives                        | prob   |
| [cX3H1]([cX3H1])[cX3H1]          | 0.7615 | [#7H2][#6H0]                           | 0.1784 |
| [#6]1[#6][#6][#6][#6][#7]1       | 0.4605 | [#7X3H2]                               | 0.5267 |
| [#6X3][#7][#6X3]                 | 0.3779 | [#7][#6H0][#6H1]                       | 0.545  |
| [cX3H0]([cX3H1])([cX3H0])[CX4H3] | 0.2914 | [cX3H0][cX3H1][cX3H1][cX3H0]           | 0.6044 |
| [#7X3H1]                         | 0.2149 | [#7][#6X3H0][#6X3H1]                   | 0.6059 |
| [cX3H1]([cX3H0])[cX3H0]          | 0.2082 | [#6X3H1][#6X3H1][#6X3H0][#6X3H1]       | 0.7451 |
| [#6]1[#6][#6][#6][#7]1           | 0.1856 | [#6H1][#6H1]                           | 0.8463 |
| [#7H][#6X3H1]                    | 0.1657 | [CX4H3][cX3H0]                         | 0.8543 |
| [#6X3][#7X3][#6X3]               | 0.1316 | [#6X3][#6][#6][#6H3]                   | 0.8705 |
| [#6H3][#6]=[#6X3]                | 0.125  | [#6]1[#6][#6][#6][#6]1                 | 0.882  |

---

Example 97 true smiles: O=C1CCC(=O)CC1 formula: C6H8O2  
Index of correct structure: 0 of 1578  
True structure loss: 0.007099  
True structure:

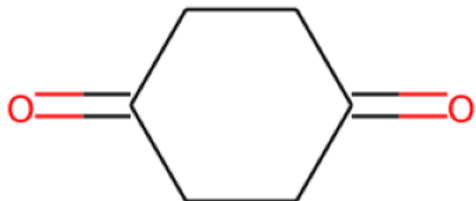

Experimental <sup>13</sup>C NMR (solvent: CDCl<sub>3</sub>)

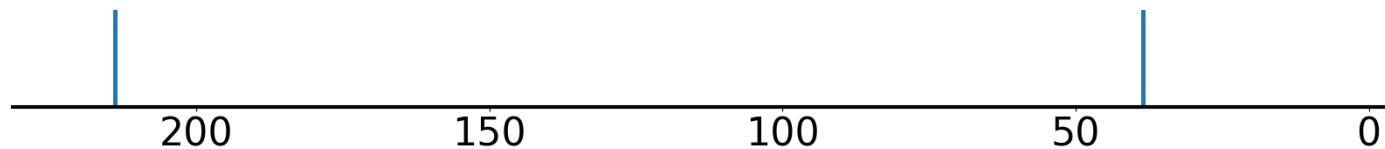

Experimental <sup>1</sup>H NMR (solvent: CDCl<sub>3</sub>)

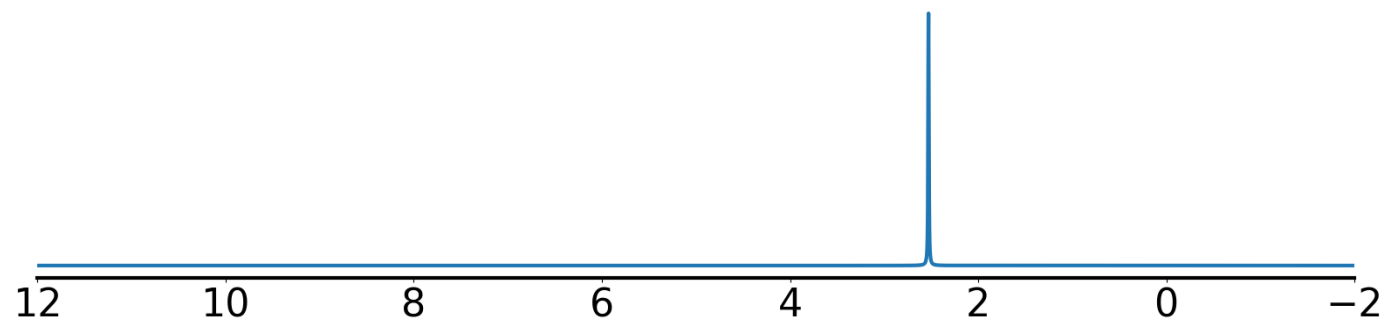

Top predicted structures (loss):

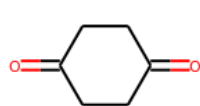

0.007099

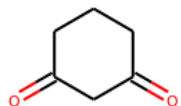

0.032071

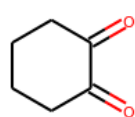

0.032482

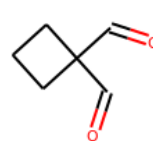

0.069982

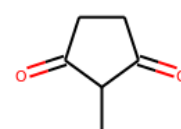

0.0849

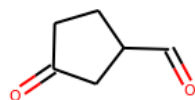

0.091144

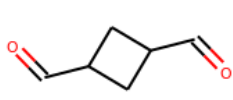

0.111186

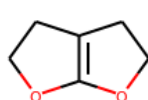

0.119501

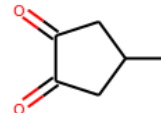

0.120469

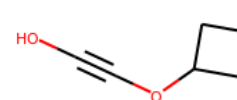

0.121847

|                                   |        |                                   |        |
|-----------------------------------|--------|-----------------------------------|--------|
| Top predicted substructures       | prob   |                                   |        |
| [CX3](=[OX1])C                    | 0.9991 | O=[CX3H0][CX4H2][CX4H2]           | 0.8807 |
| [CX4H2]([#6])[#6]                 | 0.9903 | [#6X3H0][CX4H2][CX4H2][#6X3H0]    | 0.8596 |
| [OX1H0]=[CX3H0]([#6])[CX4H2]      | 0.9902 | [CX3H0](=[OX1H0])([CX4H2])[CX4H2] | 0.8429 |
| [CX4H2][CX3]=O                    | 0.9252 | [CX4H2]CC=O                       | 0.8414 |
| [CX4H2]([CX4H2])[CX3H0]           | 0.9108 | [#6H2][#6X3H0][#6H2]              | 0.789  |
| best positives                    | prob   | best negatives                    | prob   |
| [CX3](=[OX1])C                    | 0.9991 | [CX3H1](=[CX3H2])[NX3H0]          | 0.0    |
| [CX4H2]([#6])[#6]                 | 0.9903 | [#6H3][#6H1][#6H1]=[#7]           | 0.0    |
| [OX1H0]=[CX3H0]([#6])[CX4H2]      | 0.9902 | [CX3H0](=[CX3H2])([OX2H0])[CX4H3] | 0.0    |
| [CX4H2][CX3]=O                    | 0.9252 | C=CC=CC#C                         | 0.0    |
| [CX4H2]([CX4H2])[CX3H0]           | 0.9108 | CC=CC#CC                          | 0.0    |
| O=[CX3H0][CX4H2][CX4H2]           | 0.8807 | [#8][#6H1]=[#6H1][#6H3]           | 0.0    |
| [#6X3H0][CX4H2][CX4H2][#6X3H0]    | 0.8596 | [CX4H1]([NX3H2])([CX4H2])[CX3H1]  | 0.0    |
| [CX3H0](=[OX1H0])([CX4H2])[CX4H2] | 0.8429 | [CX3H1](=[CX3H2])[OX2H0]          | 0.0    |
| [CX4H2]CC=O                       | 0.8414 | [#6H3][#6H1][#7][#7]              | 0.0    |
| [#6H2][#6X3H0][#6H2]              | 0.789  | [CX4H1]([NX3H2])([CX4H3])[CX4H1]  | 0.0    |
| worst negatives                   | prob   | worst positives                   | prob   |
| [#8]=[#6][#6H2][#6H1]             | 0.1947 | [#8]=[#6][#6][#6][#6]=[#8]        | 0.5238 |
| [#6]1[#6][#6][#6][#6]1            | 0.1936 | [CX4H2][CX4H2]                    | 0.5709 |
| C1CCCC1                           | 0.1675 | [#6]1[#6][#6][#6][#6][#6]1        | 0.6172 |
| [#6H1][#6H2]                      | 0.1624 | CCCCC                             | 0.6319 |
| [#6H1][#6H1]                      | 0.1547 | [#6H2][#6X3H0][#6H2]              | 0.789  |
| [CX3H0](=[OX1H0])([CX4H2])[CX3H0] | 0.1515 | [CX4H2]CC=O                       | 0.8414 |
| [#8][#6][#6][#6][#6]=[#8]         | 0.1312 | [CX3H0](=[OX1H0])([CX4H2])[CX4H2] | 0.8429 |
| OCC[CH2]                          | 0.1253 | [#6X3H0][CX4H2][CX4H2][#6X3H0]    | 0.8596 |
| [#6H1]                            | 0.114  | O=[CX3H0][CX4H2][CX4H2]           | 0.8807 |
| O=CC=O                            | 0.1094 | [CX4H2]([CX4H2])[CX3H0]           | 0.9108 |

---

Example 98 true smiles: CCC1CCC(=O)O1 formula: C6H10O2  
Index of correct structure: 0 of 1567  
True structure loss: 0.013298  
True structure:

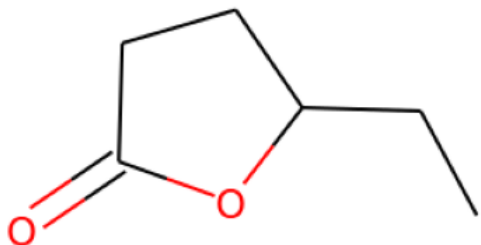

Experimental <sup>13</sup>C NMR (solvent: CDCl<sub>3</sub>)

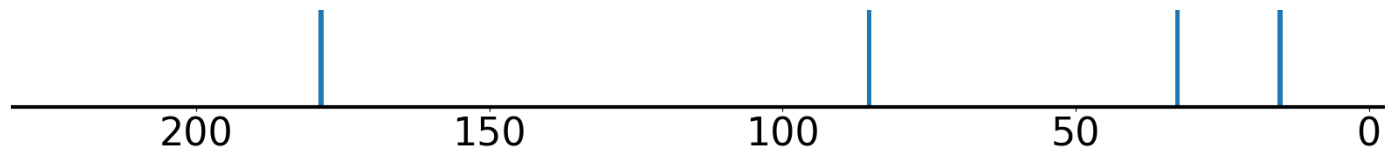

Experimental <sup>1</sup>H NMR (solvent: D<sub>2</sub>O)

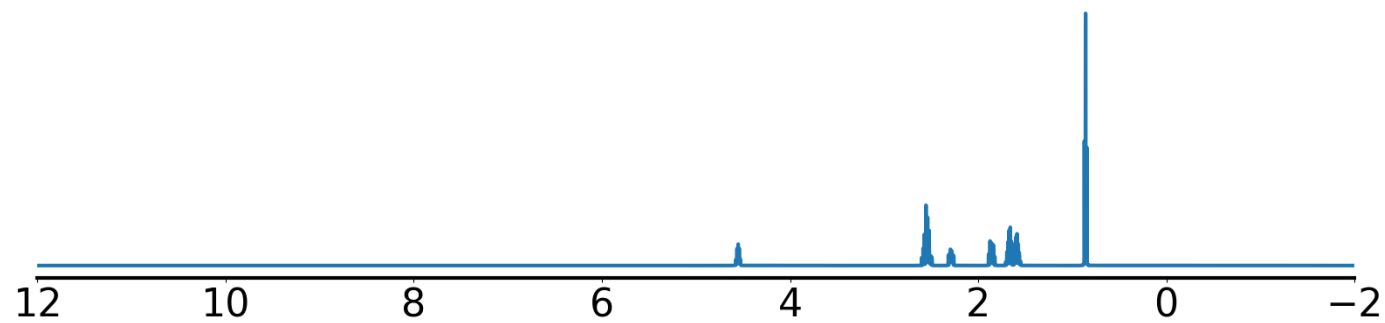

Top predicted structures (loss):

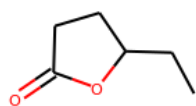

0.013298

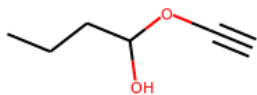

0.062732

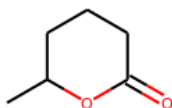

0.063131

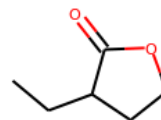

0.076545

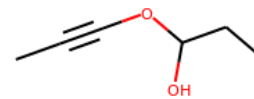

0.078268

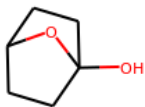

0.080148

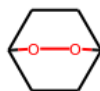

0.082432

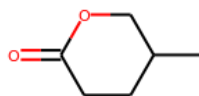

0.085663

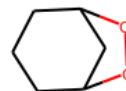

0.08738

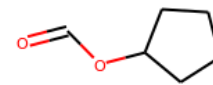

0.088436

|                                  |        |                                   |        |
|----------------------------------|--------|-----------------------------------|--------|
| Top predicted substructures      | prob   |                                   |        |
| [CX4H2]([#6])[#6]                | 1.0    | [#8][#6][#6H2]                    | 0.9888 |
| [CX4H3]                          | 0.999  | [#8]=[#6][#8]                     | 0.9856 |
| [#6H3][#6][#6]                   | 0.9979 | [CX3](=[OX1])O                    | 0.9756 |
| [CX4H3][CX4H2]                   | 0.9963 | [CX4H3][#6]                       | 0.9684 |
| [CX3](=[OX1])C                   | 0.9955 | OCC[CH2]                          | 0.9411 |
| best positives                   | prob   | best negatives                    | prob   |
| [CX4H2]([#6])[#6]                | 1.0    | [#7][#6]=[#6][#6][#6]=[#7]        | 0.0    |
| [CX4H3]                          | 0.999  | [CX3H1](=[CX3H2])[NX3H0]          | 0.0    |
| [#6H3][#6][#6]                   | 0.9979 | [#6H2]=[#7][#7]                   | 0.0    |
| [CX4H3][CX4H2]                   | 0.9963 | C=CC=CC#C                         | 0.0    |
| [CX3](=[OX1])C                   | 0.9955 | C=CC=CC=C                         | 0.0    |
| [#8][#6][#6H2]                   | 0.9888 | [CX3H0](=[NX2H1])([NX3H1])[CX4H1] | 0.0    |
| [#8]=[#6][#8]                    | 0.9856 | [CX2H0](#[CX2H1])[CX2H0]          | 0.0    |
| [CX3](=[OX1])O                   | 0.9756 | [#6H2][#7]=[#6X3H1]               | 0.0    |
| [CX4H3][#6]                      | 0.9684 | [CX4H2]([NX3H0])[CX3H1]           | 0.0    |
| OCC[CH2]                         | 0.9411 | [CX3H1](=[CX3H2])[CX3H0]          | 0.0    |
| worst negatives                  | prob   | worst positives                   | prob   |
| [#8]=[#6H0][#6H1]                | 0.3823 | [#8][#6][#6][#6][#6]=[#8]         | 0.2797 |
| [CX3](=O)[OX2H1]                 | 0.3644 | [#6H1]([#6H2])[#6H2]              | 0.3485 |
| O=[CX3][CX4H]                    | 0.3437 | [CX4H2][CX3]=O                    | 0.5141 |
| [#8][#6H0][#6H1]                 | 0.2691 | CCCCC                             | 0.558  |
| [CX4H2]([CX4H2])[CX4H2]          | 0.2266 | [OX2H0][CX3H0][CX4H2]             | 0.5787 |
| [OX2H1]                          | 0.2063 | [CX3H0](=[OX1H0])([OX2H0])[CX4H2] | 0.5794 |
| [CX4H2]([CX4H3])[CX4H2]          | 0.1943 | [CX4H2]([CX4H2])[CX3H0]           | 0.6016 |
| [#8][#6][#6]=[#8]                | 0.1765 | [OX2H0][CX4H1][CX4H2][CX4H2]      | 0.6804 |
| [#6X3][#6][#6][#6H3]             | 0.1456 | O=[CX3H0][CX4H2][CX4H2]           | 0.7081 |
| [CX4H1]([OX2H1])([CX4H2])[CX3H0] | 0.1372 | C1OCCC1                           | 0.737  |

---

Example 99 true smiles: CC1CCCC(=O)O1 formula: C6H10O2  
 Index of correct structure: 0 of 1567  
 True structure loss: 0.012951  
 True structure:

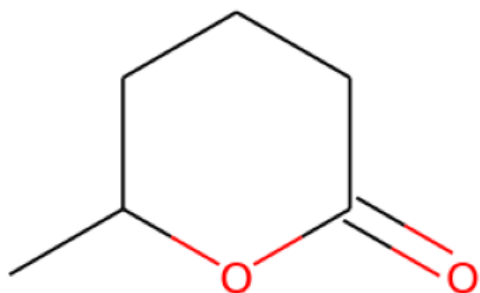

Experimental <sup>13</sup>C NMR (solvent: CDCl<sub>3</sub>)

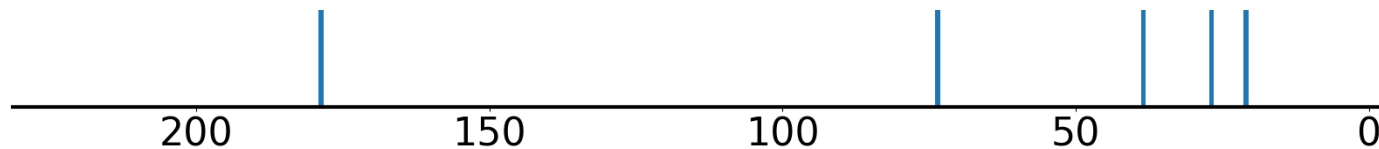

Experimental <sup>1</sup>H NMR (solvent: D<sub>2</sub>O)

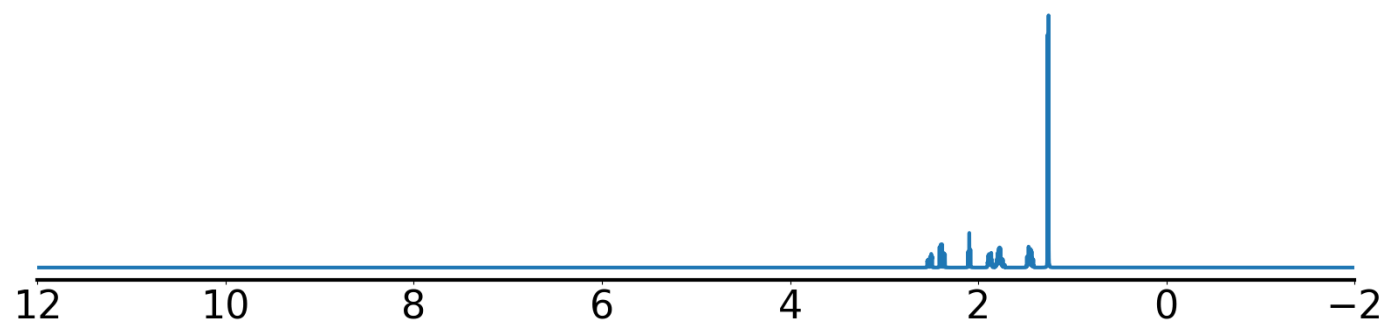

Top predicted structures (loss):

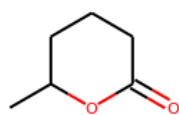

0.012951

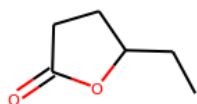

0.053548

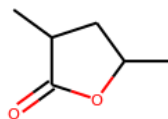

0.057716

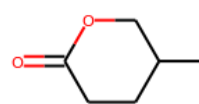

0.0581

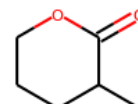

0.068806

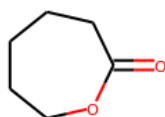

0.078512

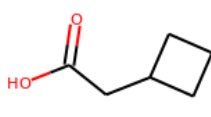

0.078936

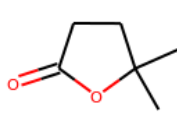

0.079061

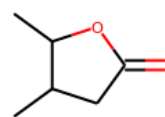

0.079458

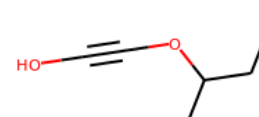

0.082227



|                                   |        |                                   |        |
|-----------------------------------|--------|-----------------------------------|--------|
| Top predicted substructures       | prob   |                                   |        |
| [CX4H2]([#6])[#6]                 | 0.9999 | [#8]=[#6][#8]                     | 0.9887 |
| [CX4H3]                           | 0.9994 | OCC[CH2]                          | 0.978  |
| [CX3](=[OX1])C                    | 0.9969 | [CX4H3][#6]                       | 0.9714 |
| [CX3](=[OX1])O                    | 0.9945 | [#6H1]                            | 0.9636 |
| [#6H3][#6][#6]                    | 0.9938 | [#8][#6][#6H2]                    | 0.9499 |
| best positives                    | prob   | best negatives                    | prob   |
| [CX4H2]([#6])[#6]                 | 0.9999 | [#7][#6]=[#6][#6][#6]=[#7]        | 0.0    |
| [CX4H3]                           | 0.9994 | [CX3H0](=[CX3H1])([OX2H0])[CX2H0] | 0.0    |
| [CX3](=[OX1])C                    | 0.9969 | C=CC=CC#C                         | 0.0    |
| [CX3](=[OX1])O                    | 0.9945 | CC#CCC#C                          | 0.0    |
| [#6H3][#6][#6]                    | 0.9938 | [CX3H0](=[CX3H1])([CX4H1])[CX2H0] | 0.0    |
| [#8]=[#6][#8]                     | 0.9887 | [CX3H1](=[CX3H2])[NX3H0]          | 0.0    |
| OCC[CH2]                          | 0.978  | CC#CCC=C                          | 0.0    |
| [CX4H3][#6]                       | 0.9714 | [#7][#6]=[#6][#6][#7]             | 0.0    |
| [#6H1]                            | 0.9636 | [#6X3H2]=[#6][#6H2][#8H]          | 0.0    |
| [#8][#6][#6H2]                    | 0.9499 | [#7][#6][#6]=[#6][#6][#7]         | 0.0    |
| worst negatives                   | prob   | worst positives                   | prob   |
| [CX3](=O)[OX2H1]                  | 0.5415 | [#8]1[#6][#6][#6][#6]1            | 0.3076 |
| [#8][#6H0][#6H1]                  | 0.4763 | O[CX4H][CX4H2]                    | 0.4531 |
| O=[CX3][CX4H]                     | 0.1904 | [OX2H0][CX4H1][CX4H2][CX4H2]      | 0.4649 |
| [OX2H1]                           | 0.1717 | [OX2H0][CX3H0][CX4H2]             | 0.5592 |
| [#8]=[#6H0][#6H1]                 | 0.15   | [CX4H]O                           | 0.5862 |
| [CX4H2][CX4H2][CX4H2][CX4H2]      | 0.1423 | [CX3H0](=[OX1H0])([OX2H0])[CX4H2] | 0.588  |
| [CX3H0](=[OX1H0])([OX2H0])[CX4H1] | 0.1377 | [CX4H2]([CX4H2])[CX4H2]           | 0.6125 |
| [#6X3][#6][#6][#6H3]              | 0.1335 | CCCCC                             | 0.7465 |
| [CX3H0](=[OX1H0])([OX2H1])[CX4H2] | 0.1298 | [OX2H0][CX4H1][CX4H3]             | 0.7621 |
| [#6H1]([#6H2])[#6H2]              | 0.1261 | [CX4H2][CX3]=O                    | 0.7856 |

---

Example 100 true smiles: CC=CC(=O)OCC formula: C6H10O2  
Index of correct structure: 0 of 1567  
True structure loss: 0.013429  
True structure:

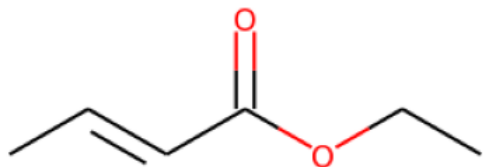

Experimental <sup>13</sup>C NMR (solvent: CDCl<sub>3</sub>)

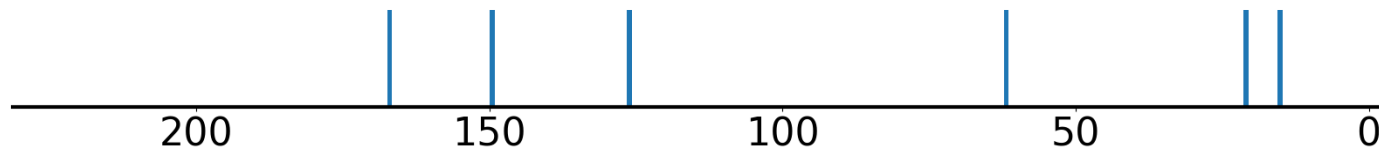

Experimental <sup>1</sup>H NMR (solvent: CDCl<sub>3</sub>)

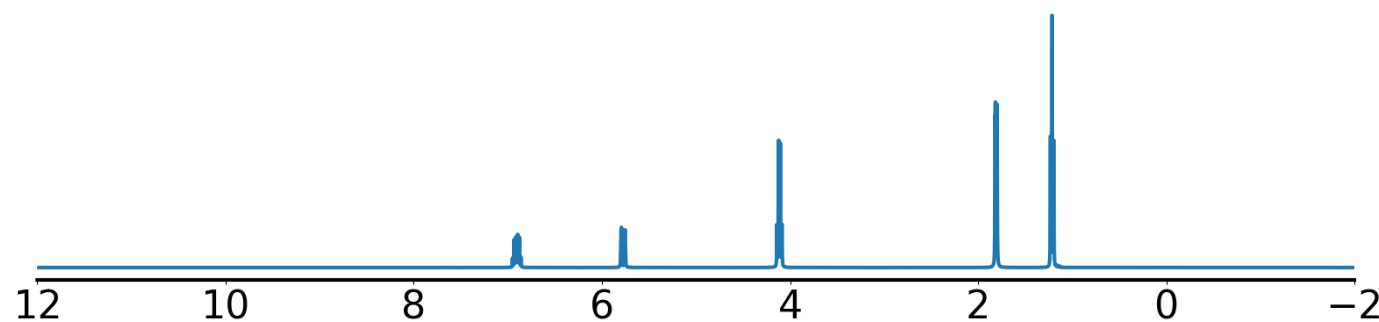

Top predicted structures (loss):

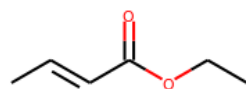

0.013429

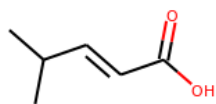

0.058213

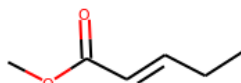

0.064394

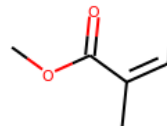

0.070942

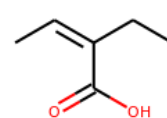

0.073778

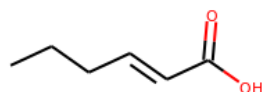

0.075099

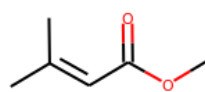

0.075477

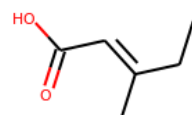

0.080694

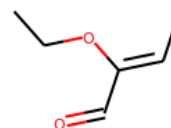

0.083619

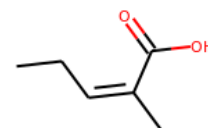

0.084162

|                             |        |                                   |        |
|-----------------------------|--------|-----------------------------------|--------|
| Top predicted substructures | prob   |                                   |        |
| [CX4H3]                     | 1.0    | [#6X3][#6X3]                      | 0.9906 |
| [CX4H3][#6]                 | 0.9998 | [CX4H3][CX3]                      | 0.9756 |
| [#6H1]                      | 0.9996 | [CX4H3][CX4H2]                    | 0.9689 |
| [CHX3](=C)C                 | 0.9961 | [#8]=[#6][#8]                     | 0.9596 |
| O[#6][#6]=[#6X3]            | 0.9909 | [CX3](=[OX1])O                    | 0.9418 |
| best positives              | prob   | best negatives                    | prob   |
| [CX4H3]                     | 1.0    | [CX2H0](#[CX2H1])[CX4H0]          | 0.0    |
| [CX4H3][#6]                 | 0.9998 | [CX2H0](#[CX2H1])[CX3H0]          | 0.0    |
| [#6H1]                      | 0.9996 | [CX4H2]([CX4H0])[CX2H0]           | 0.0    |
| [CHX3](=C)C                 | 0.9961 | CC#CCC#C                          | 0.0    |
| O[#6][#6]=[#6X3]            | 0.9909 | [#7][#6H1][#6X2]                  | 0.0    |
| [#6X3][#6X3]                | 0.9906 | C=CC=CC#C                         | 0.0    |
| [CX4H3][CX3]                | 0.9756 | [CX2H0](#[CX2H1])[CX4H2]          | 0.0    |
| [CX4H3][CX4H2]              | 0.9689 | [#6X2][#6H1][#6X2]                | 0.0    |
| [#8]=[#6][#8]               | 0.9596 | [CX2H0](#[CX2H0])[CX2H0]          | 0.0    |
| [CX3](=[OX1])O              | 0.9418 | [CX3H0](=[CX3H1])([OX2H0])[CX2H0] | 0.0    |
| worst negatives             | prob   | worst positives                   | prob   |
| [#6H3][#6][#6]              | 0.7024 | [CX3H1](=[CX3H1])[CX4H3]          | 0.5893 |
| [OX2H1]                     | 0.5216 | [CHX3]=[CHX3]                     | 0.6116 |
| [#6H3][#6][#6X3]            | 0.501  | [#8]=[#6H0][#6H1]                 | 0.6337 |
| [CX3](=O)[OX2H1]            | 0.2613 | [CH3][#6][#8]                     | 0.6669 |
| [#8H][#6H2][#6H1]           | 0.2237 | [#8][#6X3][#6X3]=[#6X3][#6H3]     | 0.6737 |
| [#6X3H1]=[#6X3H0]           | 0.2202 | O=C[CX3H]                         | 0.6854 |
| [CX4H2][CX3]=C              | 0.2159 | [CX3H0](=[OX1H0])([OX2H0])[CX3H1] | 0.7018 |
| [CX4H3][CX3H0]              | 0.1933 | [CX3](=[OX1])C                    | 0.7144 |
| [#6H1][#6H1]                | 0.1752 | [#8][#6H0][#6H1]                  | 0.7589 |
| [#6H1][#6H2]                | 0.1688 | [#6X3][#6]=[#6][#6H3]             | 0.7708 |

---

Example 101 true smiles: CC=C(C)C(=O)OC formula: C6H10O2  
Index of correct structure: 0 of 1567  
True structure loss: 0.016688  
True structure:

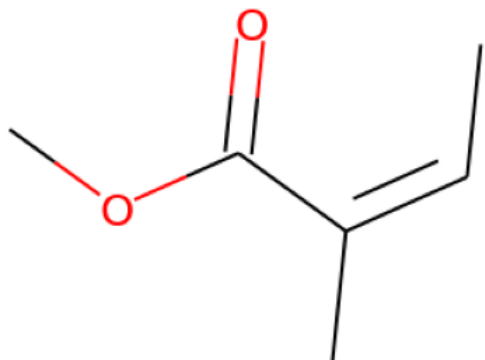

Experimental <sup>13</sup>C NMR (solvent: CDCl<sub>3</sub>)

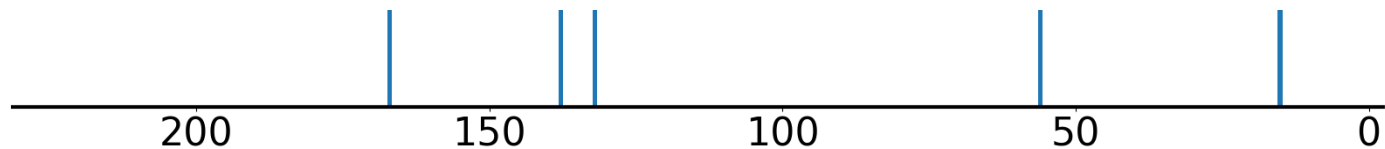

Experimental <sup>1</sup>H NMR (solvent: CDCl<sub>3</sub>)

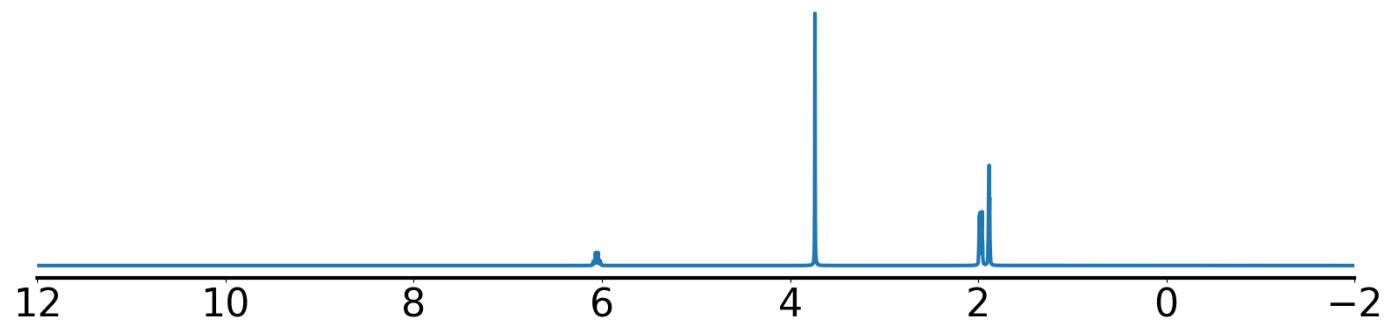

Top predicted structures (loss):

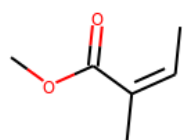

0.016688

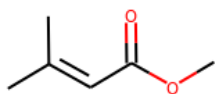

0.054286

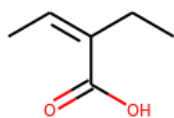

0.063237

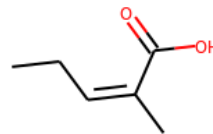

0.066651

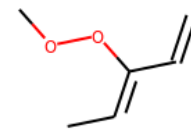

0.067998

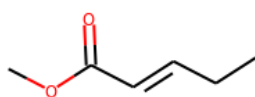

0.069045

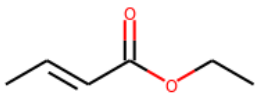

0.069707

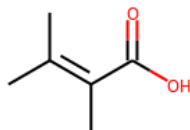

0.072092

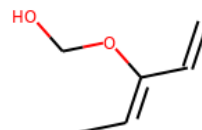

0.073025

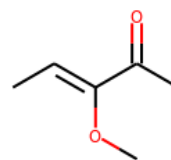

0.07791

|                               |        |                                   |        |
|-------------------------------|--------|-----------------------------------|--------|
| Top predicted substructures   | prob   |                                   |        |
| [CX4H3]                       | 1.0    | [#6X3][#6X3]                      | 0.9818 |
| [CX4H3][CX3]                  | 0.9987 | [CX4H3][OX2H0]                    | 0.9761 |
| [CHX3](=C)C                   | 0.9959 | [#8]=[#6][#8]                     | 0.9703 |
| [CX4H3][#6]                   | 0.9953 | [CX3](=[OX1])O                    | 0.9578 |
| [#6H1]                        | 0.9883 | [OX1H0]=[CX3H0][OX2H0][CX4H3]     | 0.9462 |
| best positives                | prob   | best negatives                    | prob   |
| [CX4H3]                       | 1.0    | [CX2H0](#[CX2H1])[CX4H0]          | 0.0    |
| [CX4H3][CX3]                  | 0.9987 | CCC#CC#C                          | 0.0    |
| [CHX3](=C)C                   | 0.9959 | [CX2H0](#[CX2H0])[CX2H0]          | 0.0    |
| [CX4H3][#6]                   | 0.9953 | [#6X2][#6H1][#6X2]                | 0.0    |
| [#6H1]                        | 0.9883 | [CX2H0](#[CX2H1])[CX4H2]          | 0.0    |
| [#6X3][#6X3]                  | 0.9818 | [#7][#6H1][#6X2]                  | 0.0    |
| [CX4H3][OX2H0]                | 0.9761 | [CX4H1]([CX4H1])([CX4H1])[CX2H0]  | 0.0    |
| [#8]=[#6][#8]                 | 0.9703 | CC#CCC#C                          | 0.0    |
| [CX3](=[OX1])O                | 0.9578 | [CX2H1]#[CX2H0]                   | 0.0    |
| [OX1H0]=[CX3H0][OX2H0][CX4H3] | 0.9462 | [#7][#6][#6]#[#7]                 | 0.0    |
| worst negatives               | prob   | worst positives                   | prob   |
| [#6X3H1][#6X3H0]              | 0.5715 | [#6H3][#6][#6X3]                  | 0.2463 |
| [#8][#6H0][#6H1]              | 0.5222 | [#6H3][#6H0]                      | 0.2868 |
| [CX3H1](=[CX3H1])[CX3H0]      | 0.3951 | [#6H3][#6][#6]                    | 0.363  |
| [#6H1][#6H2]                  | 0.3063 | [CX4H3][CX3H0]                    | 0.4756 |
| [CHX3]=[CHX3]                 | 0.3    | [OX1H0]=[CX3H0][CX3H0][CX4H3]     | 0.4879 |
| OCC[CH2]                      | 0.2782 | [CX4H3][CX3H0][CX3]=O             | 0.5088 |
| [OX2H1]                       | 0.2497 | [#6H3][#6]=[#6][#6H3]             | 0.5642 |
| [CX4H2]([#6])[#6]             | 0.2103 | [CX3H0](=[OX1H0])([OX2H0])[CX3H0] | 0.6444 |
| [#6X3]=[#6X3][#6X3]=[#6X3]    | 0.1917 | [#6X3H1]=[#6X3H0]                 | 0.684  |
| [#8]=[#6H0][#6H1]             | 0.169  | [CX3H0](=[CX3H1])([CX4H3])[CX3H0] | 0.7601 |

---

Example 102 true smiles: NCC(N)C(=O)O formula: C3H8N2O2  
Index of correct structure: 3 of 1492  
True structure loss: 0.033238  
True structure:

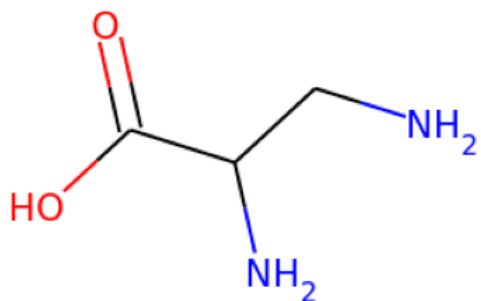

Experimental <sup>13</sup>C NMR (solvent: D2O)



Experimental <sup>1</sup>H NMR (solvent: D2O)

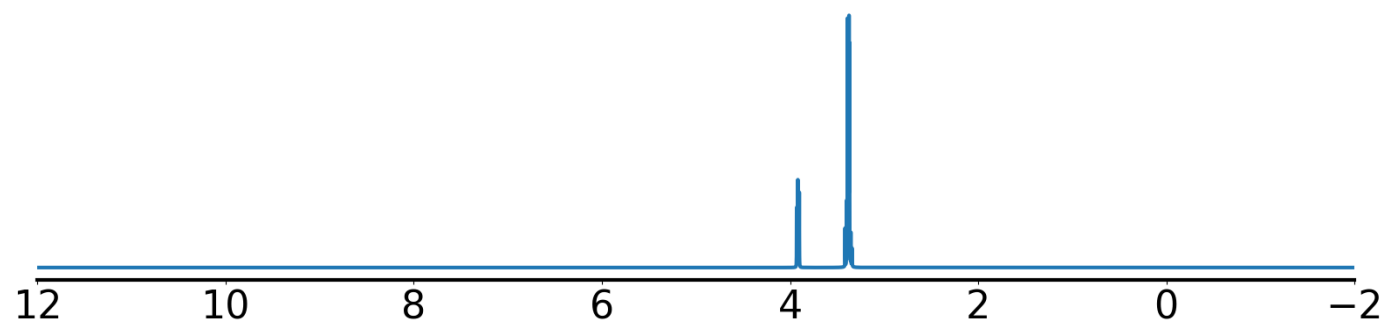

Top predicted structures (loss):

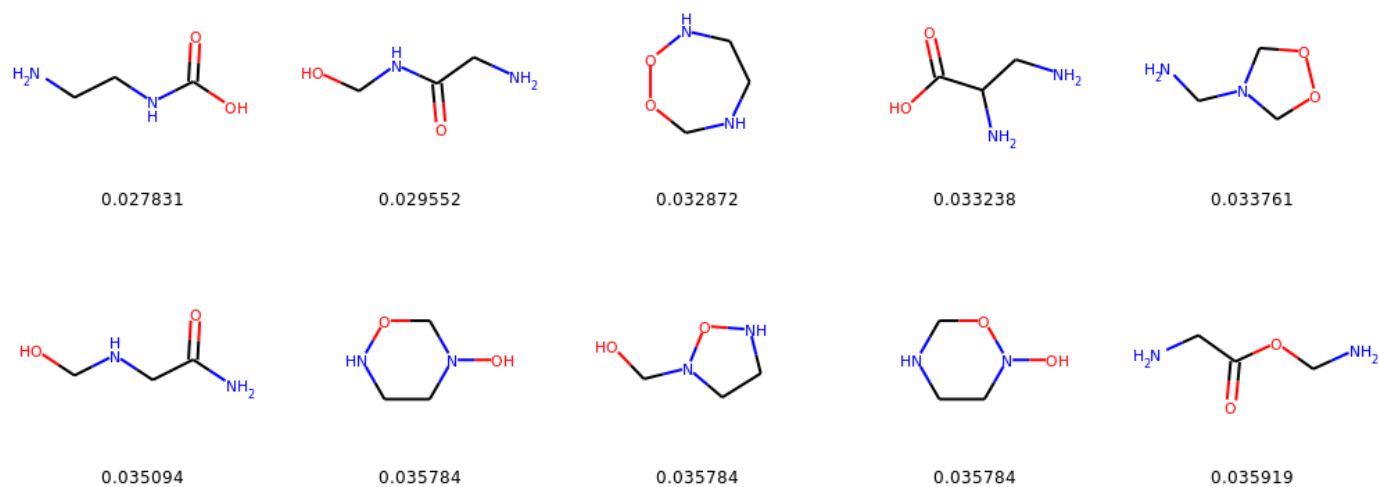

|                                  |        |                                   |        |
|----------------------------------|--------|-----------------------------------|--------|
| Top predicted substructures      | prob   |                                   |        |
| [#7X3][#6H2]                     | 0.9757 | [#6H2][#7][#6X3]                  | 0.747  |
| [#7][#6H2]                       | 0.9703 | [CX3](=[OX1])O                    | 0.704  |
| [CX3](=[OX1])C                   | 0.9503 | [#7][#6][#6X3]                    | 0.6932 |
| [#7X3H2]                         | 0.8974 | [OX2H1]                           | 0.6901 |
| [#8]=[#6][#8]                    | 0.7911 | [#7][#6H2][#6H2]                  | 0.6776 |
| best positives                   | prob   | best negatives                    | prob   |
| [#7X3][#6H2]                     | 0.9757 | [CX2H1]#[CX2H0][CX3H1]=[CX3H0]    | 0.0    |
| [#7][#6H2]                       | 0.9703 | C=CC=CC#C                         | 0.0    |
| [CX3](=[OX1])C                   | 0.9503 | CC=CCC#C                          | 0.0    |
| [#7X3H2]                         | 0.8974 | C=CCCC#C                          | 0.0    |
| [#8]=[#6][#8]                    | 0.7911 | [CX2H0](#[CX2H1])[cX3H0]          | 0.0    |
| [CX3](=[OX1])O                   | 0.704  | CC=CC#CC                          | 0.0    |
| [#7][#6][#6X3]                   | 0.6932 | CCC=CC#C                          | 0.0    |
| [OX2H1]                          | 0.6901 | [CX2H0](#[CX2H1])[CX4H1]          | 0.0    |
| [#7H2][#6X4H1][#6X3]             | 0.6597 | [CX3H0](=[CX3H1])([OX2H0])[CX2H0] | 0.0    |
| [CX4H1]([NX3H2])([CX4H2])[CX3H0] | 0.5951 | [CX4H2]([CX4H3])[CX2H0]           | 0.0    |
| worst negatives                  | prob   | worst positives                   | prob   |
| [#6H2][#7][#6X3]                 | 0.747  | [#8][#6H0][#6H1]                  | 0.0814 |
| [#7][#6H2][#6H2]                 | 0.6776 | [CX4H2]([NX3H2])[CX4H1]           | 0.0905 |
| [CX4H2][CX4H2]                   | 0.5541 | [#7][#6][#6][#6X3]                | 0.1933 |
| [#7X3H1]                         | 0.5117 | OCC[CH2]                          | 0.2037 |
| [#7][#6H2][#6H2][#7]             | 0.3901 | [CX3H0](=[OX1H0])([OX2H1])[CX4H1] | 0.247  |
| [CX4H2]([NX3H1])[CX4H2]          | 0.3779 | [#7][#6H2][#6H1]                  | 0.2681 |
| [CX4H2][CX3]=O                   | 0.3691 | [#6H1][#6H2]                      | 0.3226 |
| [#8][#6][#6H2]                   | 0.3554 | [CX3](=O)[OX2H1]                  | 0.3505 |
| [#7][#6H0][#6H1]                 | 0.2894 | O=[CX3][CX4H]                     | 0.373  |
| [#7][#6][#7]                     | 0.2414 | [#6H1]                            | 0.3959 |

---

Example 103 true smiles: O=C1CCCCN1 formula: C5H9NO  
Index of correct structure: 0 of 1318  
True structure loss: 0.021931  
True structure:

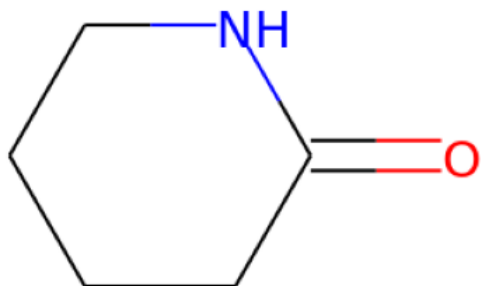

Experimental <sup>13</sup>C NMR (solvent: CDCl<sub>3</sub>)



Experimental <sup>1</sup>H NMR (solvent: CDCl<sub>3</sub>)

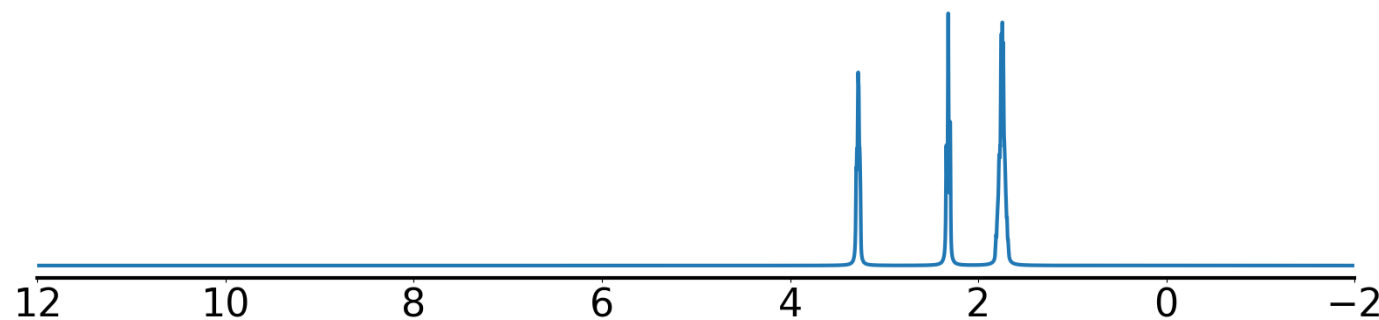

Top predicted structures (loss):

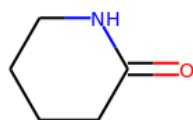

0.021931

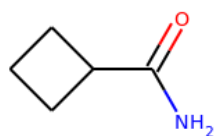

0.039314

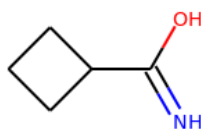

0.053053

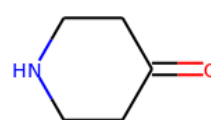

0.056398

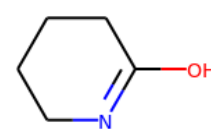

0.057907

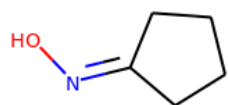

0.061226

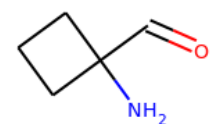

0.066954

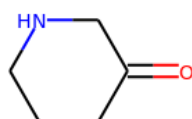

0.067872

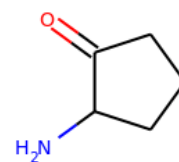

0.068434

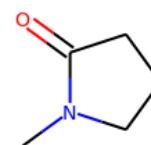

0.069597



|                              |        |                                        |        |
|------------------------------|--------|----------------------------------------|--------|
| Top predicted substructures  | prob   |                                        |        |
| [CX4H2]([#6])[#6]            | 0.9997 | [CX4H2]([CX4H2])[CX4H1]                | 0.8712 |
| [CX3](=[OX1])C               | 0.9803 | [#6H1][#6H2]                           | 0.8172 |
| [CX4H2][CX4H2]               | 0.9471 | [#7][#6H2]                             | 0.7855 |
| [CX4H2]CC=O                  | 0.9007 | [#7X3][#6H2]                           | 0.7626 |
| [CX4H2]([CX4H2])[CX4H2]      | 0.8927 | [#7][#6H2][#6H2]                       | 0.7342 |
| best positives               | prob   | best negatives                         | prob   |
| [CX4H2]([#6])[#6]            | 0.9997 | C=CC=CC#C                              | 0.0    |
| [CX3](=[OX1])C               | 0.9803 | [CX3H0](=[CX3H1])([OX2H0])[CX2H0]      | 0.0    |
| [CX4H2][CX4H2]               | 0.9471 | [CX2H1][CX2H0][CX3H1]=[CX3H0]          | 0.0    |
| [CX4H2]CC=O                  | 0.9007 | [CX2H0](#[CX2H1])[CX3H0]               | 0.0    |
| [CX4H2]([CX4H2])[CX4H2]      | 0.8927 | CC=CC#CC                               | 0.0    |
| [#7][#6H2]                   | 0.7855 | CC=CCC#C                               | 0.0    |
| [#7X3][#6H2]                 | 0.7626 | CC#CCC=C                               | 0.0    |
| [#7][#6H2][#6H2]             | 0.7342 | [#6H2]=[#6][#6X2]                      | 0.0    |
| [CX4H2][CX4H2][CX4H2][CX4H2] | 0.6299 | [OX2H0]1[CX4H2][CX4H1][CX3H0]=[CX3H1]1 | 0.0    |
| [CX4H2]([CX4H2])[CX3H0]      | 0.5912 | [CX3H1](=[CX3H1])[CX2H0]               | 0.0    |
| worst negatives              | prob   | worst positives                        | prob   |
| [CX4H2]([CX4H2])[CX4H1]      | 0.8712 | [#6]1[#6][#6][#6][#7]1                 | 0.2652 |
| [#6H1][#6H2]                 | 0.8172 | [CX3H0](=[OX1H0])([NX3H1])[CX4H2]      | 0.3322 |
| [#8]=[#6H0][#6H1]            | 0.6528 | [#7X3H1]                               | 0.4776 |
| O=[CX3][CX4H]                | 0.5727 | [CX4H2]([NX3H1])[CX4H2]                | 0.5186 |
| [#6H1]                       | 0.5518 | [#6H2][#7][#6X3]                       | 0.5292 |
| C1CCC1                       | 0.4851 | [CX4H2][CX3]=O                         | 0.5444 |
| [#7X3H2]                     | 0.3897 | O=[CX3H0][CX4H2][CX4H2]                | 0.5865 |
| [#6]1[#6][#6][#6][#7]1       | 0.3607 | [CX4H2]([CX4H2])[CX3H0]                | 0.5912 |
| CCCCC                        | 0.3148 | [CX4H2][CX4H2][CX4H2][CX4H2]           | 0.6299 |
| [#6H1][#6H2][#6][#6][#7]     | 0.3014 | [#7][#6H2][#6H2]                       | 0.7342 |

---

Example 104 true smiles: COC(=O)CC(C)=O formula: C5H8O3  
Index of correct structure: 0 of 1131  
True structure loss: 0.014216  
True structure:

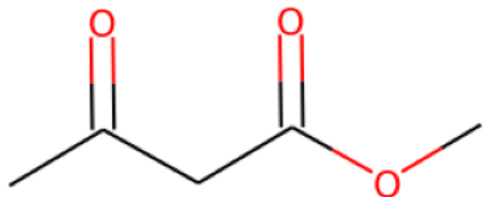

Experimental <sup>13</sup>C NMR (solvent: CDCl<sub>3</sub>)

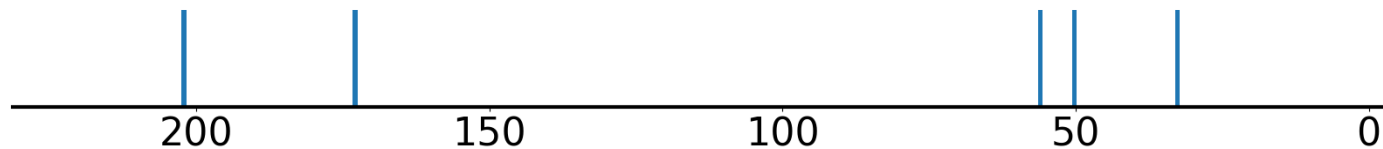

Experimental <sup>1</sup>H NMR (solvent: d<sub>2</sub>o)

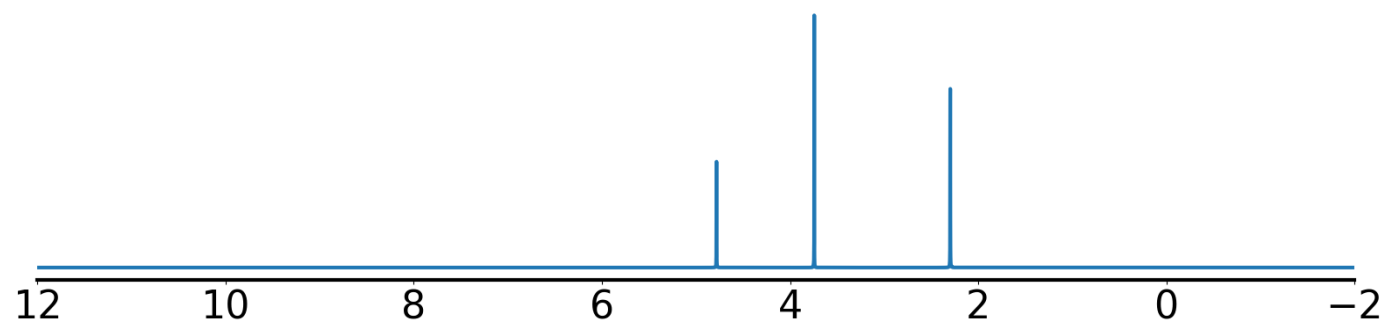

Top predicted structures (loss):

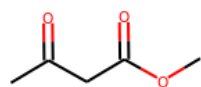

0.014216

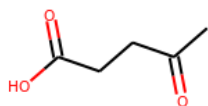

0.052128

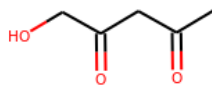

0.066422

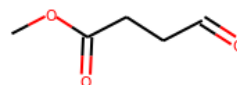

0.072955

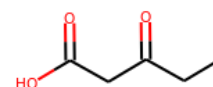

0.078236

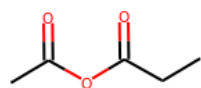

0.081265

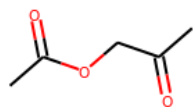

0.081615

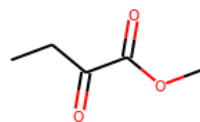

0.085724

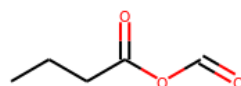

0.086552

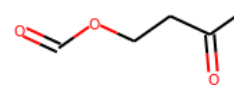

0.087887

|                                   |        |                                  |        |
|-----------------------------------|--------|----------------------------------|--------|
| Top predicted substructures       | prob   |                                  |        |
| [CX3](=[OX1])C                    | 0.9999 | [CX4H2][CX3]=O                   | 0.979  |
| [CX4H3]                           | 0.996  | [#6H3][#6H0]                     | 0.9559 |
| [#8]=[#6][#8]                     | 0.9906 | [CX4H3][CX3]                     | 0.9502 |
| [OX1H0]=[CX3H0][OX2H0][CX4H3]     | 0.988  | [OX1H0]=[CX3H0]([#8])[CX4H2]     | 0.9338 |
| [CX3](=[OX1])O                    | 0.9844 | [CX4H3][CX3H0]                   | 0.9332 |
| best positives                    | prob   | best negatives                   | prob   |
| [CX3](=[OX1])C                    | 0.9999 | [CX2H0](#[CX2H0])[CX2H0]         | 0.0    |
| [CX4H3]                           | 0.996  | CCC#CC#C                         | 0.0    |
| [#8]=[#6][#8]                     | 0.9906 | C=CC=CC#C                        | 0.0    |
| [OX1H0]=[CX3H0][OX2H0][CX4H3]     | 0.988  | CCC=CC#C                         | 0.0    |
| [CX3](=[OX1])O                    | 0.9844 | [#6X2][#6H1][#6X2]               | 0.0    |
| [CX4H2][CX3]=O                    | 0.979  | [CX3H1](=[CX3H2])[CX2H0]         | 0.0    |
| [#6H3][#6H0]                      | 0.9559 | [CX4H1]([CX4H2])([CX4H1])[CX2H0] | 0.0    |
| [CX4H3][CX3]                      | 0.9502 | [CX2H0](#[CX2H1])[CX3H0]         | 0.0    |
| [OX1H0]=[CX3H0]([#8])[CX4H2]      | 0.9338 | [CX2H0](#[CX2H1])[CX2H0]         | 0.0    |
| [CX4H3][CX3H0]                    | 0.9332 | [#7][#6H1][#6X2]                 | 0.0    |
| worst negatives                   | prob   | worst positives                  | prob   |
| OCC[CH2]                          | 0.3999 | [#6X3][#6][#6][#6H3]             | 0.1515 |
| [CX4H2]CC=O                       | 0.3695 | [CX4H2]([CX3H0])[CX3H0]          | 0.5671 |
| [CX4H2]([#6])[O]                  | 0.3341 | [#8][#6][#6][#6X3]               | 0.572  |
| [#6X3][#6X3]                      | 0.2794 | O=[#6][#6][#6X3]                 | 0.619  |
| [CX3H0](=[OX1H0])([OX2H1])[CX4H2] | 0.2406 | [#6H3][#6X3H0][#6H2]             | 0.6379 |
| [#8]=[#6][#6]=[#8]                | 0.1996 | [#6H3][#6][#6]                   | 0.6951 |
| [#6X3][#6H2][#8]                  | 0.199  | [OX1H0]=[CX3H0][CX4H2][CX3H0]    | 0.6999 |
| [CX3H1](=[OX1H0])[CX4H2]          | 0.1962 | [#6X3][#6H2][#6X3]               | 0.7    |
| [OX2H1][CX4H2][#6X3H0]            | 0.1949 | [OX2H0][CX3H0][CX4H2]            | 0.7147 |
| [#8]=[#6][#6][#6][#6]=[#8]        | 0.1804 | [#8][#6][#6H2]                   | 0.7324 |

---

Example 105 true smiles: CC(C)C(=O)C(=O)O formula: C5H8O3  
Index of correct structure: 0 of 1131  
True structure loss: 0.01553  
True structure:

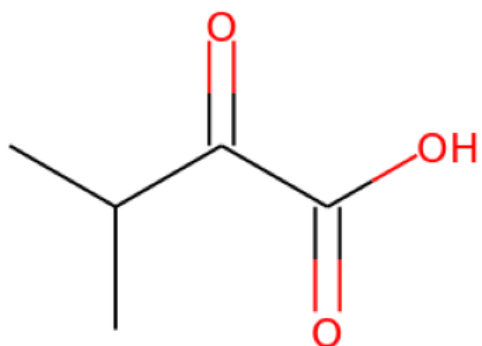

Experimental <sup>13</sup>C NMR (solvent: D2O)

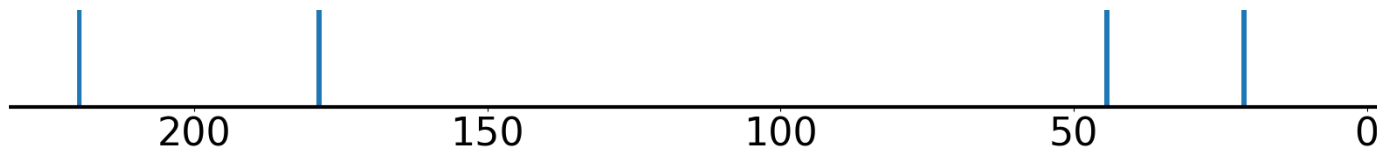

Experimental <sup>1</sup>H NMR (solvent: D2O)

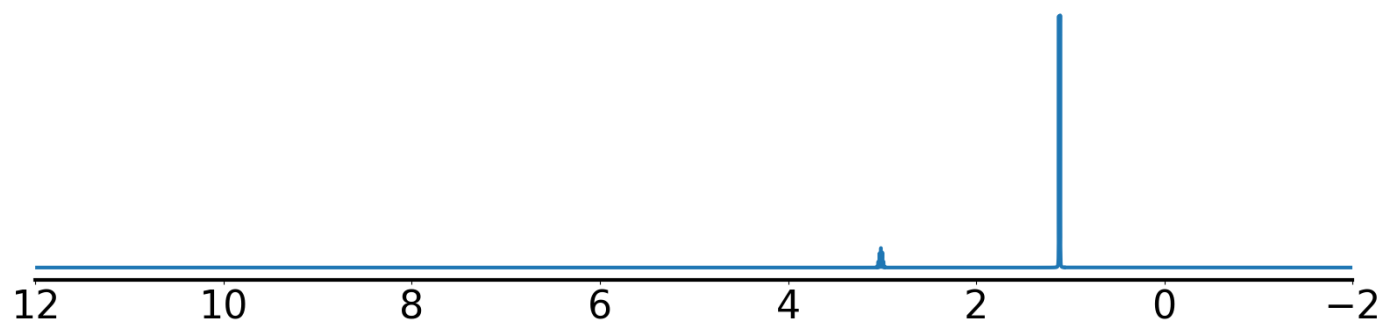

Top predicted structures (loss):

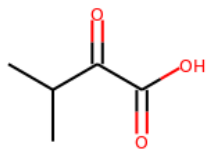

0.01553

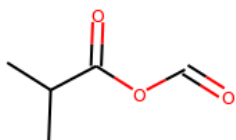

0.039704

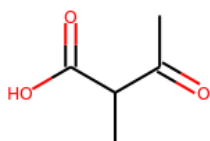

0.070354

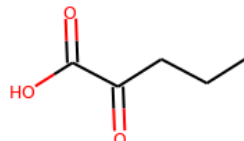

0.074231

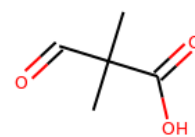

0.076095

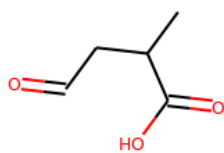

0.083627

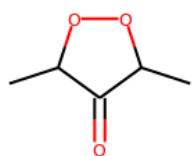

0.085353

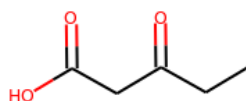

0.08562

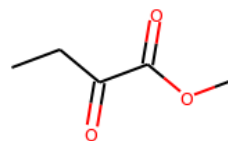

0.092913

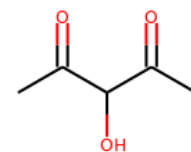

0.096611

|                                   |        |                                   |        |
|-----------------------------------|--------|-----------------------------------|--------|
| Top predicted substructures       | prob   |                                   |        |
| [CX3](=[OX1])C                    | 1.0    | [CX3](=[OX1])O                    | 0.986  |
| [CX4H3]                           | 0.9994 | [#8]=[#6][#8]                     | 0.9764 |
| [#6H3][#6][#6]                    | 0.9971 | [CX3](=O)[OX2H1]                  | 0.9725 |
| [CX4H3][#6]                       | 0.9946 | [CX4H1]([CX4H3])([CX4H3])[CX3H0]  | 0.9523 |
| [OX2H1]                           | 0.9936 | [CHX4]([CH3X4])[CH3X4]            | 0.9512 |
| best positives                    | prob   | best negatives                    | prob   |
| [CX3](=[OX1])C                    | 1.0    | CC=CCC#C                          | 0.0    |
| [CX4H3]                           | 0.9994 | CCC=CC#C                          | 0.0    |
| [#6H3][#6][#6]                    | 0.9971 | [CX2H1]#[CX2H0][CX3H1]=[CX3H0]    | 0.0    |
| [CX4H3][#6]                       | 0.9946 | CCC#CC#C                          | 0.0    |
| [OX2H1]                           | 0.9936 | [CX2H0](#[CX2H0])[CX2H0]          | 0.0    |
| [CX3](=[OX1])O                    | 0.986  | [CX4H3][CX2H0]                    | 0.0    |
| [#8]=[#6][#8]                     | 0.9764 | CC=CC#CC                          | 0.0    |
| [CX3](=O)[OX2H1]                  | 0.9725 | [#6X2][#6H1][#6X2]                | 0.0    |
| [CX4H1]([CX4H3])([CX4H3])[CX3H0]  | 0.9523 | [CX2H0](#[CX2H1])[CX3H1]          | 0.0    |
| [CHX4]([CH3X4])[CH3X4]            | 0.9512 | C=CC=CC#C                         | 0.0    |
| worst negatives                   | prob   | worst positives                   | prob   |
| [CX4H2][CX3]=O                    | 0.6438 | [#6X3][#6X3]                      | 0.1274 |
| [CX3H0](=[OX1H0])([OX2H1])[CX4H1] | 0.6319 | [CX3H0](=[OX1H0])([OX2H1])[CX3H0] | 0.2547 |
| [#8][#6H0][#6H1]                  | 0.5364 | [#8]=[#6][#6]=[#8]                | 0.4514 |
| [CX4H2]CC=O                       | 0.4105 | [#8][#6][#6]=[#8]                 | 0.5127 |
| [CH3]CC[OH]                       | 0.3886 | [CX3H0](=[OX1H0])([CX4H1])[CX3H0] | 0.5151 |
| O=[#6][#6][#6X3]                  | 0.3837 | [#6X3][#6][#6][#6H3]              | 0.5841 |
| [#8]=[#6][#6][#6][#6]=[#8]        | 0.3575 | O=CC=O                            | 0.596  |
| [#8][#6][#6][#6X3]                | 0.2902 | [#6H1]                            | 0.8389 |
| [CX4H2]([#6])[#6]                 | 0.2431 | [#8]=[#6H0][#6H1]                 | 0.8818 |
| CCCCC                             | 0.1383 | O=[CX3][CX4H]                     | 0.8887 |

---

Example 106 true smiles: CC(=O)CCC(=O)O formula: C5H8O3  
Index of correct structure: 0 of 1131  
True structure loss: 0.004847  
True structure:

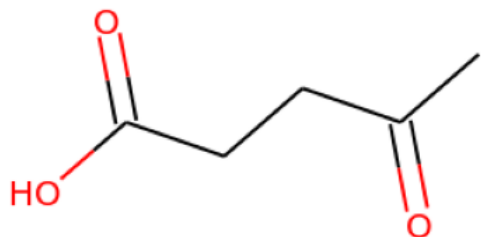

Experimental <sup>13</sup>C NMR (solvent: CDCl<sub>3</sub>)

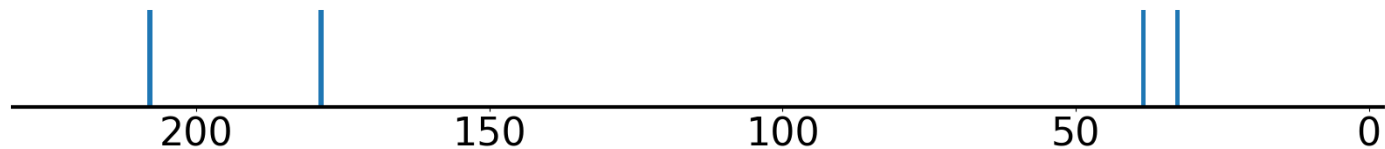

Experimental <sup>1</sup>H NMR (solvent: D<sub>2</sub>O)

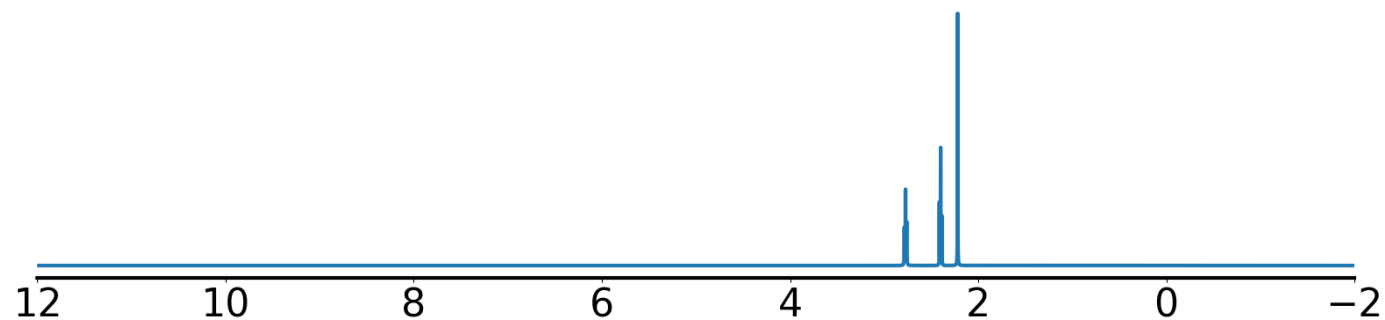

Top predicted structures (loss):

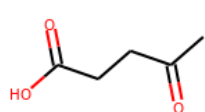

0.004847

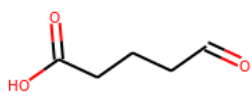

0.080461

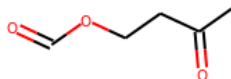

0.083891

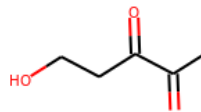

0.083916

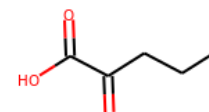

0.08424

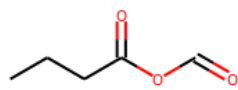

0.091077

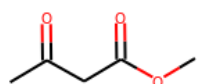

0.098337

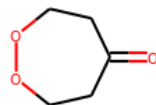

0.105338

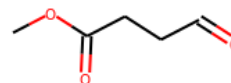

0.106729

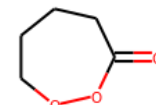

0.111187

|                                   |        |                                   |        |
|-----------------------------------|--------|-----------------------------------|--------|
| Top predicted substructures       | prob   |                                   |        |
| [CX3](=[OX1])C                    | 1.0    | [CX4H3][CX3H0]                    | 0.9941 |
| [CX4H2]([#6])[#6]                 | 0.9995 | O=[CX3H0][CX4H2][CX4H2]           | 0.993  |
| [CX4H3][CX3]                      | 0.9983 | [CX4H2]([CX4H2])[CX3H0]           | 0.9922 |
| [OX1H0]=[CX3H0][CX4H3]            | 0.997  | [#8]=[#6][#8]                     | 0.9914 |
| [#6H3][#6H0]                      | 0.995  | [CX4H2][CX3]=O                    | 0.9872 |
| best positives                    | prob   | best negatives                    | prob   |
| [CX3](=[OX1])C                    | 1.0    | C=CC=CC#C                         | 0.0    |
| [CX4H2]([#6])[#6]                 | 0.9995 | CCC#CC#C                          | 0.0    |
| [CX4H3][CX3]                      | 0.9983 | [CX2H0](#[CX2H1])[CX3H0]          | 0.0    |
| [OX1H0]=[CX3H0][CX4H3]            | 0.997  | [#6X2][#6H1][#6X2]                | 0.0    |
| [#6H3][#6H0]                      | 0.995  | CCC=CC#C                          | 0.0    |
| [CX4H3][CX3H0]                    | 0.9941 | [CX2H0](#[CX2H1])[CX3H1]          | 0.0    |
| O=[CX3H0][CX4H2][CX4H2]           | 0.993  | [CX3H0](=[CX3H1])([CX4H1])[CX2H0] | 0.0    |
| [CX4H2]([CX4H2])[CX3H0]           | 0.9922 | CC=CC#CC                          | 0.0    |
| [#8]=[#6][#8]                     | 0.9914 | [CX2H0](#[CX2H1])[CX2H0]          | 0.0    |
| [CX4H2][CX3]=O                    | 0.9872 | CC=CCC#C                          | 0.0    |
| worst negatives                   | prob   | worst positives                   | prob   |
| CCCCC                             | 0.2577 | [#8][#6][#6][#6][#6]=[#8]         | 0.5867 |
| [CX4H2]([CX4H2])[CX4H2]           | 0.2181 | [#8]=[#6][#6][#6][#6]=[#8]        | 0.6627 |
| [CX3H0](=[OX1H0])([OX2H0])[CX4H2] | 0.1606 | OCC[CH2]                          | 0.8379 |
| [#8]=[#6H0][#6H1]                 | 0.1477 | [#6H3][#6X3H0][#6H2]              | 0.8718 |
| O=CC=O                            | 0.1172 | [CX4H3][#6]                       | 0.8852 |
| [CX4H2][CX3H]                     | 0.0851 | [#6X3H0][CX4H2][CX4H2][#6X3H0]    | 0.9004 |
| [#6X3][#6X3]                      | 0.0825 | [CX3H0](=[OX1H0])([CX4H3])[CX4H2] | 0.9064 |
| [#8]=[#6][#6H2][#6H1]             | 0.0791 | [OX1H0]=[CX3H0]([#8])[CX4H2]      | 0.909  |
| [#8]=[#6][#6]=[#8]                | 0.0775 | [CX4H2]CC=O                       | 0.921  |
| [CX3H0](=[OX1H0])([OX2H1])[CX3H0] | 0.0613 | [OX2H1]                           | 0.9392 |

---

Example 107 true smiles: O=C(O)CC(O)C(=O)O formula: C4H6O5  
Index of correct structure: 0 of 1119  
True structure loss: 0.029603  
True structure:

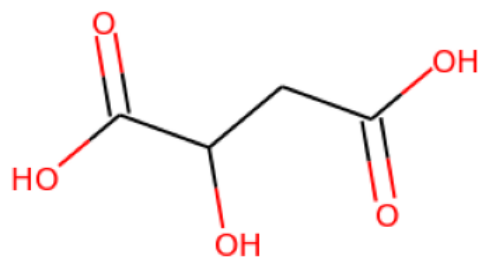

Experimental <sup>13</sup>C NMR (solvent: D2O)

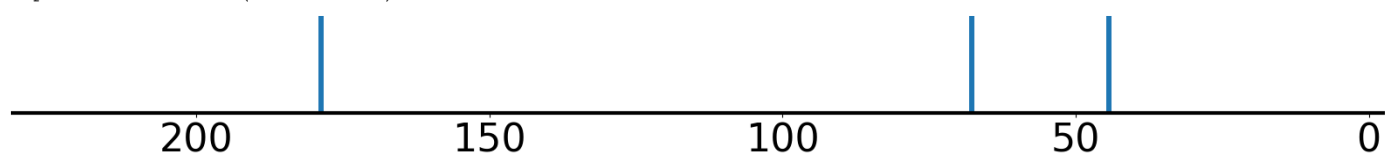

Experimental <sup>1</sup>H NMR (solvent: d2o)

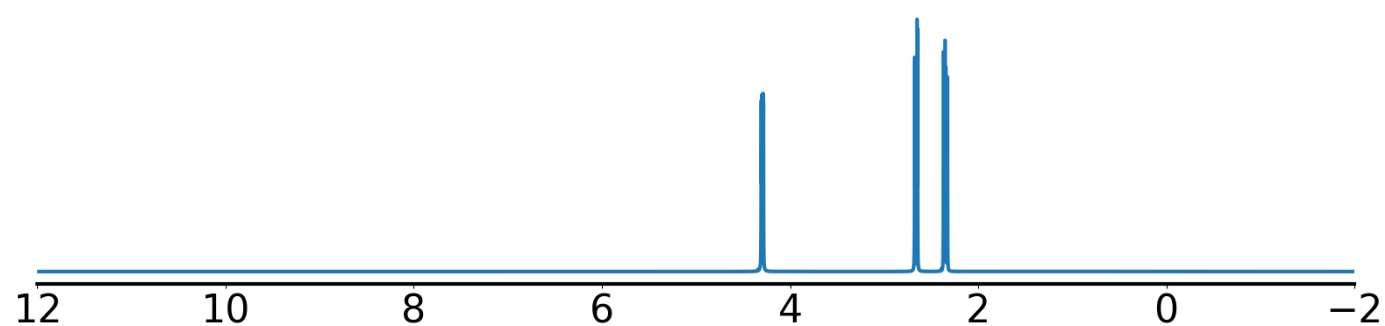

Top predicted structures (loss):

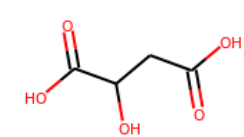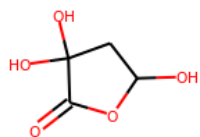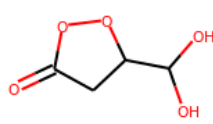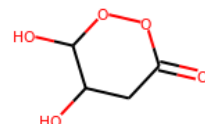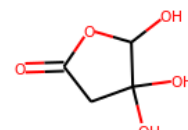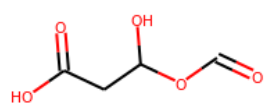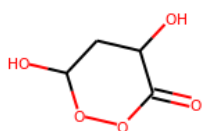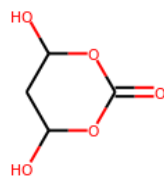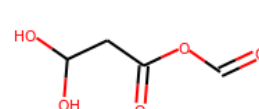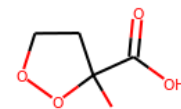



|                                        |        |                                           |        |
|----------------------------------------|--------|-------------------------------------------|--------|
| Top predicted substructures            | prob   |                                           |        |
| [CX3](=[OX1])C                         | 0.9995 | [#8][#6][#6H2]                            | 0.9694 |
| [#8]=[#6][#8]                          | 0.9988 | OCC[CH2]                                  | 0.9374 |
| [OX2H1]                                | 0.9982 | [#6H1]                                    | 0.8988 |
| [CX3](=[OX1])O                         | 0.9935 | [#6H1][#6H2]                              | 0.7982 |
| [CX4H2]([#6])[#6]                      | 0.9911 | [CX4H2][CX3]=O                            | 0.7758 |
| best positives                         | prob   | best negatives                            | prob   |
| [CX3](=[OX1])C                         | 0.9995 | [#6H3][#6X3][#6X3]=[#6X3H2]               | 0.0    |
| [#8]=[#6][#8]                          | 0.9988 | [#6X3H1]=[#6X3H1][#6X3H0]=[#6X3H1]        | 0.0    |
| [OX2H1]                                | 0.9982 | [CX2H1]#[CX2H0][CX3H1]=[CX3H0]            | 0.0    |
| [CX3](=[OX1])O                         | 0.9935 | CC#CCC=C                                  | 0.0    |
| [CX4H2]([#6])[#6]                      | 0.9911 | [CX3H0](=[CX3H2])([CX4H3])[CX4H2]         | 0.0    |
| [#8][#6][#6H2]                         | 0.9694 | [CX3H0](=[CX3H1])([CX4H3])[CX3H1]         | 0.0    |
| OCC[CH2]                               | 0.9374 | CCC=CC#C                                  | 0.0    |
| [#6H1]                                 | 0.8988 | [#6H3][#6H1][#6H1]=[#7]                   | 0.0    |
| [#6H1][#6H2]                           | 0.7982 | [CX3H1](=[CX3H1])[CX2H0]                  | 0.0    |
| [CX4H2][CX3]=O                         | 0.7758 | [CX3H0](=[CX3H0])([CX4H3])[CX4H2]         | 0.0    |
| worst negatives                        | prob   | worst positives                           | prob   |
| [CX4H2]([#6])[O]                       | 0.3773 | [#8]=[#6][#6][#6][#6]=[#8]                | 0.0659 |
| [#6H1][#6H1]                           | 0.3479 | [CX4H1]( [OX2H1] ) ( [CX4H2] ) [CX3H0]    | 0.0977 |
| [#6H1]( [#6H2] ) [#6H2]                | 0.2463 | [OX1H0]=[CX3H0][CX4H1]( [OX2H1] ) [CX4H2] | 0.1663 |
| [CX4H2](O)[CHX4]                       | 0.1937 | O=[CX3][CX4H]                             | 0.1757 |
| [#8][#6H1][#6H1]                       | 0.1826 | [#8H][#6X4H1][#6X3H0]                     | 0.2003 |
| [CX4H1]( [OX2H1] ) ( [CX4H2] ) [CX4H1] | 0.1557 | [#8]=[#6H0][#6H1]                         | 0.2463 |
| [#7][#6][#6X3]                         | 0.1468 | [#8][#6][#6]=[#8]                         | 0.2987 |
| [CX4H2]( [CX4H1] ) [CX4H0]             | 0.1286 | [CX4H2]CC=O                               | 0.4384 |
| [OX2H0][CX3H0][CX4H2]                  | 0.1186 | [OH][CX4H]                                | 0.4442 |
| C10CCC1                                | 0.1107 | [#8]=[#6][#6H2][#6H1]                     | 0.4543 |

---

Example 108 true smiles: NCc1ccco1 formula: C5H7NO  
Index of correct structure: 0 of 1024  
True structure loss: 0.028721  
True structure:

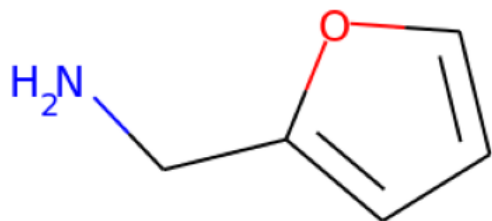

Experimental <sup>13</sup>C NMR (solvent: CDCl<sub>3</sub>)

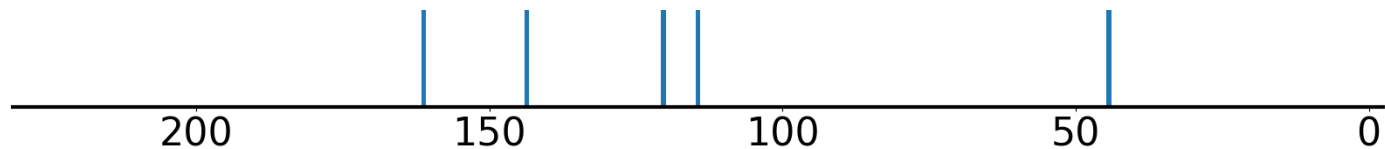

Experimental <sup>1</sup>H NMR (solvent: CDCl<sub>3</sub>)

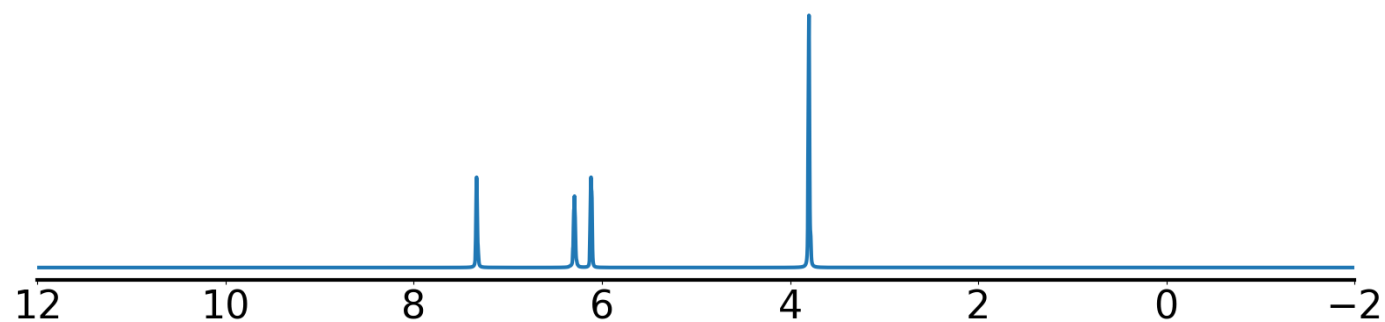

Top predicted structures (loss):

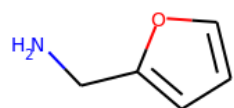

0.028721

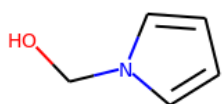

0.043498

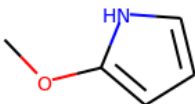

0.052437

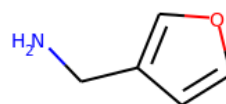

0.059929

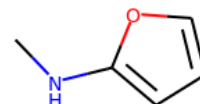

0.060608

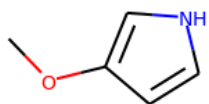

0.062206

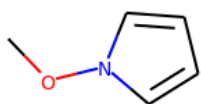

0.065483

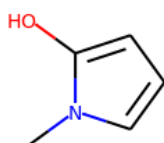

0.066442

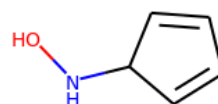

0.067302

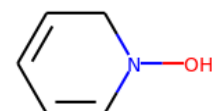

0.068634

|                             |        |                                           |        |
|-----------------------------|--------|-------------------------------------------|--------|
| Top predicted substructures | prob   |                                           |        |
| [#6H1]                      | 0.9995 | [cH]                                      | 0.8507 |
| [#7][#6H2]                  | 0.9652 | [#6H1][#6H1]                              | 0.8482 |
| [#6X3][#6X3]                | 0.9642 | [#7X3H2]                                  | 0.8372 |
| [#7][#6][#6X3]              | 0.9179 | [cH][cH]                                  | 0.8349 |
| [#7X3][#6H2]                | 0.8774 | [#6X3][#6H2][#7]                          | 0.7894 |
| best positives              | prob   | best negatives                            | prob   |
| [#6H1]                      | 0.9995 | [CX2H0](#[CX2H0])[CX2H0]                  | 0.0    |
| [#7][#6H2]                  | 0.9652 | [OX2H0][CX4H2][CX2H0]#[CX2H1]             | 0.0    |
| [#6X3][#6X3]                | 0.9642 | [CX2H0](#[CX2H1])[cX3H0]                  | 0.0    |
| [#7][#6][#6X3]              | 0.9179 | [CX2H1]#[CX2H0][CX3H1]=[CX3H0]            | 0.0    |
| [#7X3][#6H2]                | 0.8774 | [CX2H0](#[CX2H1])[CX4H1]                  | 0.0    |
| [cH]                        | 0.8507 | [CX4H0]([OX2H1])([CX4H3])([CX4H2])[CX4H1] | 0.0    |
| [#6H1][#6H1]                | 0.8482 | CCC#CC#C                                  | 0.0    |
| [#7X3H2]                    | 0.8372 | [CX2H0](#[CX2H1])[CX2H0]                  | 0.0    |
| [cH][cH]                    | 0.8349 | CC=CCC#C                                  | 0.0    |
| [#6X3][#6H2][#7]            | 0.7894 | [CX2H0](#[CX2H1])[CX3H1]                  | 0.0    |
| worst negatives             | prob   | worst positives                           | prob   |
| [CHX3](=C)C                 | 0.5954 | [#8][#6H1][#6H1]                          | 0.0087 |
| [#6X3][#7][#6X3]            | 0.5573 | [#8][#6H][#6X3][#6X3H]                    | 0.0734 |
| [#6H2][#7][#6X3]            | 0.4365 | o[cH]                                     | 0.1203 |
| [CHX3]=[CHX3]               | 0.4179 | [cX3H1]([oX2H0])[cX3H1]                   | 0.2167 |
| [#6X3][#7X3][#6X3]          | 0.4093 | [#8][#6H0][#6H1]                          | 0.4846 |
| [#7][#6H0][#6H1]            | 0.3005 | [#6X3][#6X3][#6X3][#6X3]                  | 0.4908 |
| [#6H1][#6H2]                | 0.2936 | [#8][#6][#6H2]                            | 0.4909 |
| [#7][#6X3H0][#6X3H1]        | 0.2918 | [#7H2][#6H2]                              | 0.4961 |
| [#7][#6H2][#6H1]            | 0.2891 | [#8][#6][#6][#6X3]                        | 0.5389 |
| [#7X3H1]                    | 0.2768 | [#7][#6][#6][#6X3]                        | 0.5895 |

---

Example 109 true smiles: OCC1CCCCO1 formula: C6H12O2  
 Index of correct structure: 0 of 903  
 True structure loss: 0.016167  
 True structure:

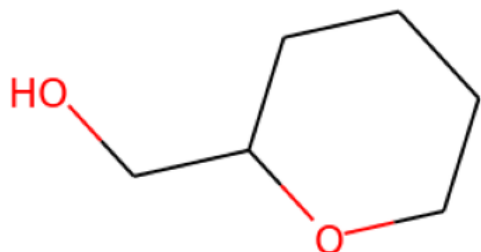

Experimental <sup>13</sup>C NMR (solvent: CDCl<sub>3</sub>)

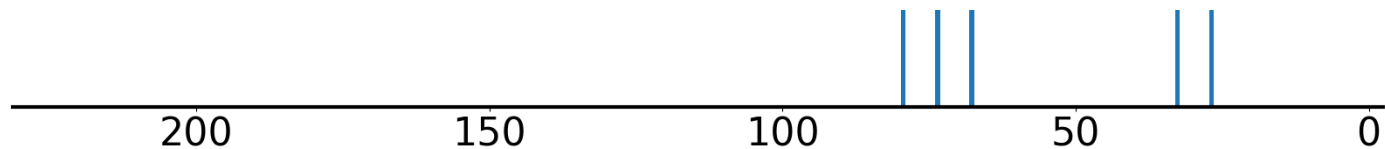

Experimental <sup>1</sup>H NMR (solvent: CDCl<sub>3</sub>)

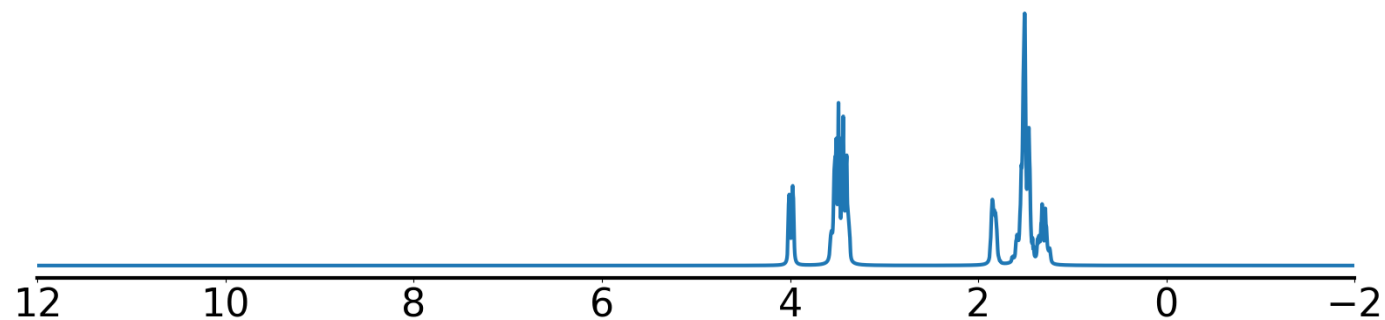

Top predicted structures (loss):

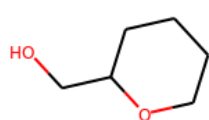

0.016167

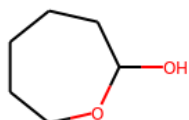

0.019617

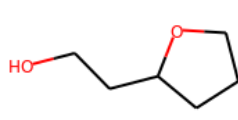

0.02226

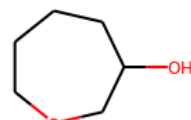

0.032337

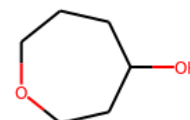

0.034418

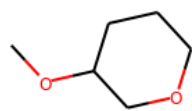

0.040589

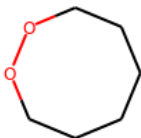

0.041438

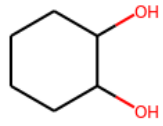

0.041947

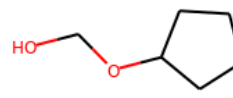

0.042096

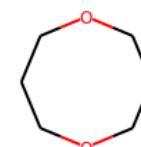

0.046171

|                                  |        |                                   |        |
|----------------------------------|--------|-----------------------------------|--------|
| Top predicted substructures      | prob   |                                   |        |
| [CX4H2]([#6])[#6]                | 1.0    | [CX4H2][CX4H2]                    | 0.9866 |
| OCC[CH2]                         | 0.9997 | [CX4H]O                           | 0.9866 |
| [#8][#6][#6H2]                   | 0.999  | [#6H1]                            | 0.9857 |
| [CX4H2]([CX4H2])[CX4H1]          | 0.997  | O[CX4H][CX4H2]                    | 0.9662 |
| [CX4H2]([#6])[O]                 | 0.9963 | [#6H1][#6H2]                      | 0.9605 |
| best positives                   | prob   | best negatives                    | prob   |
| [CX4H2]([#6])[#6]                | 1.0    | [CX3H0](=[CX3H1])([OX2H0])[CX2H0] | 0.0    |
| OCC[CH2]                         | 0.9997 | C=CC=CC#C                         | 0.0    |
| [#8][#6][#6H2]                   | 0.999  | [CX2H0](#[CX2H1])[CX3H0]          | 0.0    |
| [CX4H2]([CX4H2])[CX4H1]          | 0.997  | [CX3H0](=[CX3H1])([CX4H1])[CX2H0] | 0.0    |
| [CX4H2]([#6])[O]                 | 0.9963 | [CX2H0](#[CX2H0])[CX4H0]          | 0.0    |
| [CX4H2][CX4H2]                   | 0.9866 | [CX2H1]#[CX2H0][CX3H1]=[CX3H0]    | 0.0    |
| [CX4H]O                          | 0.9866 | [CX3H1](=[CX3H2])[CX3H0]          | 0.0    |
| [#6H1]                           | 0.9857 | [#6X3H1][#6X3H0][#6X4H1][#7]      | 0.0    |
| O[CX4H][CX4H2]                   | 0.9662 | CC#CCC=C                          | 0.0    |
| [#6H1][#6H2]                     | 0.9605 | [CX3H0][CX3H1]=[CX3H1][CX3H0]     | 0.0    |
| worst negatives                  | prob   | worst positives                   | prob   |
| [#6X4H2][#6H1][#8H]              | 0.5738 | [CX4H2]([OX2H1])[CX4H1]           | 0.1718 |
| [#8][#6][#6][#6][#6][#8]         | 0.5118 | [CX4H2](O)[CHX4]                  | 0.1948 |
| [#8][#6H1][#6H1]                 | 0.42   | [#8H][#6H2][#6H1]                 | 0.2252 |
| O[CX4H]([CX4H2])[CX4H1]          | 0.4182 | [#6H1]([#6H2])[#6H2]              | 0.2796 |
| [OH][CX4H]                       | 0.361  | [#8][#6][#6H2][#8]                | 0.612  |
| [CX4H1]([OX2H1])([CX4H2])[CX4H1] | 0.2831 | [#8]1[#6][#6][#6][#6]1            | 0.6319 |
| [#6H1][#6H1]                     | 0.2603 | [CX4H](O)CO                       | 0.6398 |
| [CX4H1][CX4H2][CX4H2][CX4H1]     | 0.1723 | [CX4H1]([OX2H0])([CX4H2])[CX4H2]  | 0.6677 |
| [CX4H2][OX2H0][CX4H2]            | 0.1527 | CCCCC                             | 0.6845 |
| [#6]1[#6][#6][#6][#6]1           | 0.1491 | [#6H2][#8][#6H1]                  | 0.7462 |

---

Example 110 true smiles: CCCCC(=O)O formula: C6H12O2  
Index of correct structure: 0 of 903  
True structure loss: 0.004445  
True structure:

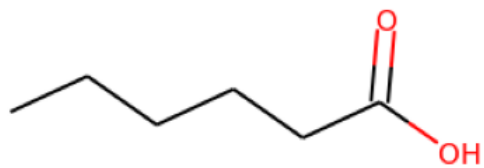

Experimental <sup>13</sup>C NMR (solvent: CDCl<sub>3</sub>)

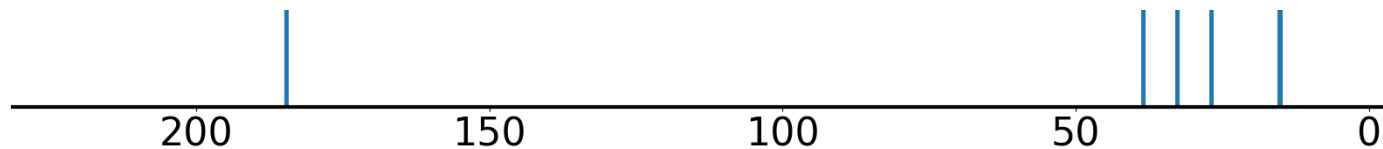

Experimental <sup>1</sup>H NMR (solvent: D<sub>2</sub>O)

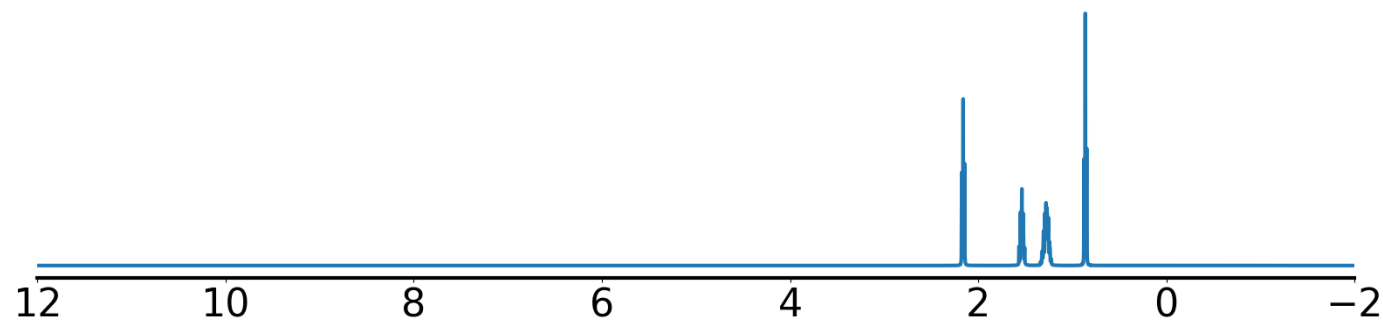

Top predicted structures (loss):

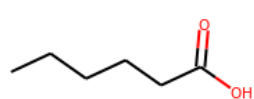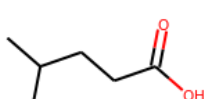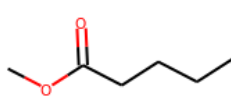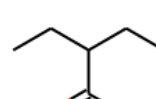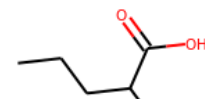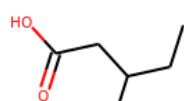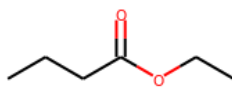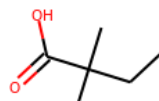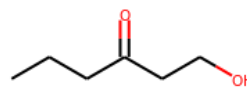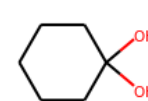

|                                   |        |                                |        |
|-----------------------------------|--------|--------------------------------|--------|
| Top predicted substructures       | prob   |                                |        |
| [CX4H2]([#6])[#6]                 | 1.0    | [CX4H3][#6]                    | 0.9981 |
| [#6H3][#6][#6]                    | 0.9998 | [CX4H3]                        | 0.9971 |
| [CX4H3][CX4H2]                    | 0.9993 | [#8]=[#6][#8]                  | 0.9947 |
| [CX3](=O)[OX2H1]                  | 0.9991 | [CX3](=[OX1])O                 | 0.9835 |
| [CX3](=[OX1])C                    | 0.999  | [OX2H1]                        | 0.9755 |
| best positives                    | prob   | best negatives                 | prob   |
| [CX4H2]([#6])[#6]                 | 1.0    | [CX2H0](#[CX2H1])[CX3H0]       | 0.0    |
| [#6H3][#6][#6]                    | 0.9998 | C=CC=CC#C                      | 0.0    |
| [CX4H3][CX4H2]                    | 0.9993 | CCC=CC#C                       | 0.0    |
| [CX3](=O)[OX2H1]                  | 0.9991 | CCC#CC#C                       | 0.0    |
| [CX3](=[OX1])C                    | 0.999  | [CX2H0](#[CX2H1])[CX4H0]       | 0.0    |
| [CX4H3][#6]                       | 0.9981 | [CX2H1]#[CX2H0][CX3H1]=[CX3H0] | 0.0    |
| [CX4H3]                           | 0.9971 | CC=CC#CC                       | 0.0    |
| [#8]=[#6][#8]                     | 0.9947 | [#6X2][#6H1][#6X2]             | 0.0    |
| [CX3](=[OX1])O                    | 0.9835 | CC#CCC#C                       | 0.0    |
| [OX2H1]                           | 0.9755 | [CX2H0](#[CX2H0])[CX2H0]       | 0.0    |
| worst negatives                   | prob   | worst positives                | prob   |
| [#6H1][#6H2]                      | 0.3048 | CCCCC                          | 0.6494 |
| [CX3H0](=[OX1H0])([OX2H1])[CX4H1] | 0.2195 | [#8][#6][#6H2]                 | 0.688  |
| [#6H1]                            | 0.1738 | [CX4H2][CX3]=O                 | 0.8214 |
| [#6X3][#6][#6][#6H3]              | 0.1248 | [CX4H2][CX4H2][CX4H2][CX4H2]   | 0.8511 |
| [#8]=[#6H0][#6H1]                 | 0.0998 | [OX1H0]=[CX3H0]([#8])[CX4H2]   | 0.8614 |
| [CHX4]([CH3X4])[CH2X4]            | 0.0806 | OCC[CH2]                       | 0.8741 |
| [CH3]CC[OH]                       | 0.0799 | O=[CX3H0][CX4H2][CX4H2]        | 0.8788 |
| [#8][#6H0][#6H1]                  | 0.071  | [CX4H2]([CX4H2])[CX4H2]        | 0.8848 |
| [#6H1]([#6H2])[#6H2]              | 0.071  | [CX4H2]CC=O                    | 0.8945 |
| [#6H3][#6][#6X3]                  | 0.0699 | [CX4H2]([CX4H2])[CX3H0]        | 0.9015 |

---

Example 111 true smiles: CCOC(=O)C(C)C formula: C6H12O2  
Index of correct structure: 0 of 903  
True structure loss: 0.022851  
True structure:

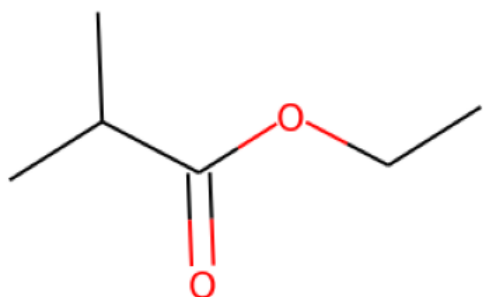

Experimental <sup>13</sup>C NMR (solvent: CDCl<sub>3</sub>)

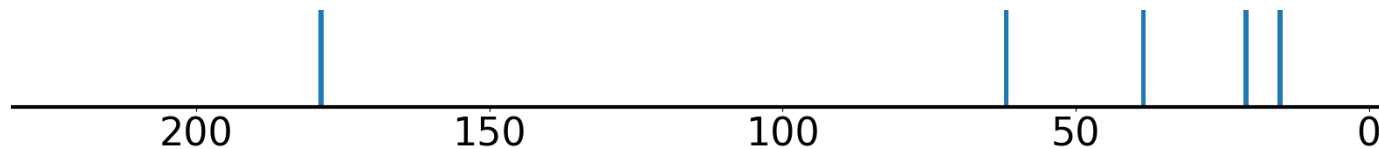

Experimental <sup>1</sup>H NMR (solvent: CDCl<sub>3</sub>)

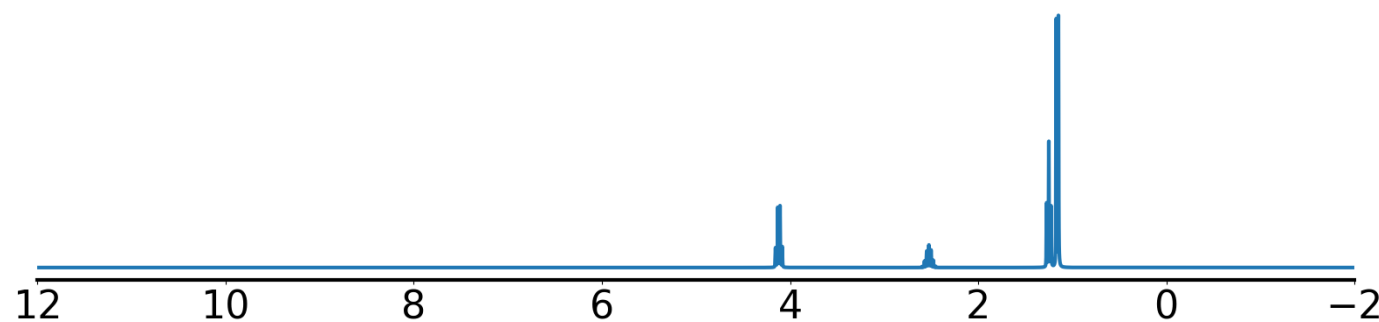

Top predicted structures (loss):

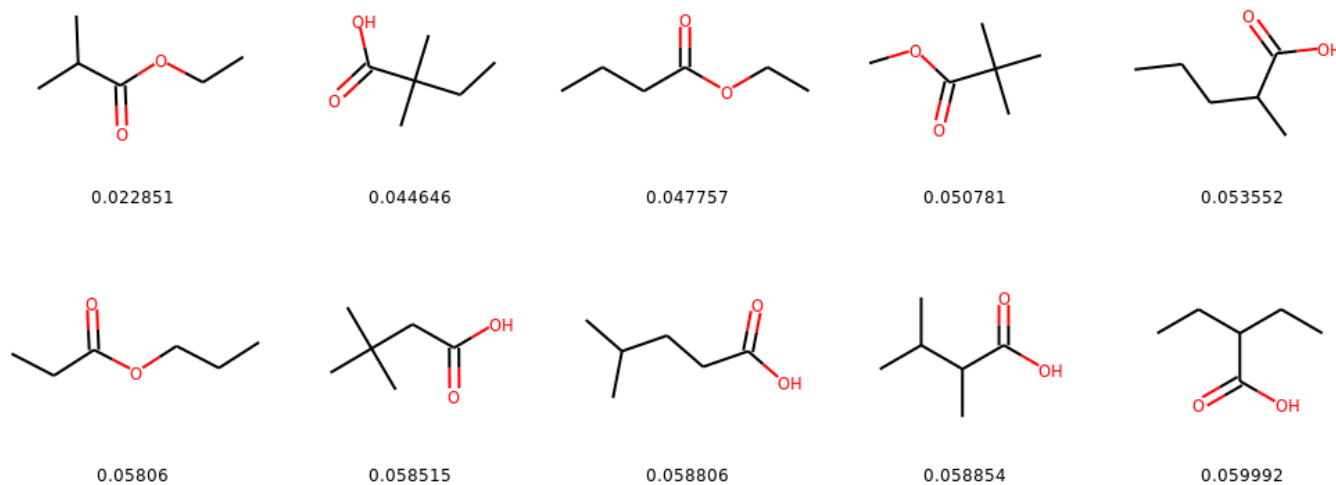



|                                   |        |                                   |        |
|-----------------------------------|--------|-----------------------------------|--------|
| Top predicted substructures       | prob   |                                   |        |
| [CX4H3]                           | 1.0    | [CX3](=[OX1])O                    | 0.9329 |
| [#6H3][#6][#6]                    | 0.9999 | [CX4H2]([#6])[O]                  | 0.9303 |
| [CX4H3][#6]                       | 0.999  | [CX4H3][CX4H1]                    | 0.8783 |
| [CX3](=[OX1])C                    | 0.9873 | [#6H3][#6][#6X3]                  | 0.8551 |
| [#8]=[#6][#8]                     | 0.9825 | [CX4H3][CX4H2]                    | 0.8471 |
| best positives                    | prob   | best negatives                    | prob   |
| [CX4H3]                           | 1.0    | C=CC=CC#C                         | 0.0    |
| [#6H3][#6][#6]                    | 0.9999 | [CX2H0](#[CX2H1])[cX3H0]          | 0.0    |
| [CX4H3][#6]                       | 0.999  | [CX3H0](=[CX3H1])([OX2H0])[CX2H0] | 0.0    |
| [CX3](=[OX1])C                    | 0.9873 | CC#CCC#C                          | 0.0    |
| [#8]=[#6][#8]                     | 0.9825 | [CX2H0](#[CX2H1])[CX4H0]          | 0.0    |
| [CX3](=[OX1])O                    | 0.9329 | [CX3H0](=[CX3H1])([CX4H2])[CX2H0] | 0.0    |
| [CX4H2]([#6])[O]                  | 0.9303 | CCC=CC#C                          | 0.0    |
| [CX4H3][CX4H1]                    | 0.8783 | [#6X2][#6H1][#6X2]                | 0.0    |
| [#6H3][#6][#6X3]                  | 0.8551 | CC=CC#CC                          | 0.0    |
| [CX4H3][CX4H2]                    | 0.8471 | CCC#CC#C                          | 0.0    |
| worst negatives                   | prob   | worst positives                   | prob   |
| [OX2H1]                           | 0.7563 | [CX3H0](=[OX1H0])([OX2H0])[CX4H1] | 0.1421 |
| [#6H3][#6][#6][#6H3]              | 0.6401 | [#8]=[#6H0][#6H1]                 | 0.1627 |
| [CX3](=O)[OX2H1]                  | 0.614  | [CHX4]([CH3X4])[CH3X4]            | 0.2393 |
| [#6H3][#6H0]                      | 0.5914 | [CX4H1](CX4H3)([CX4H3])[CX3H0]    | 0.3492 |
| [CX4H3][CX4H0]                    | 0.5165 | O=[CX3][CX4H]                     | 0.3638 |
| [OX1H0]=[CX3H0]([#8])[CX4H2]      | 0.4751 | [CH3][#6][#8]                     | 0.5874 |
| [CX4H2][CX3]=O                    | 0.3545 | [#8][#6H0][#6H1]                  | 0.6496 |
| [CX3H0](=[OX1H0])([OX2H1])[CX4H2] | 0.3298 | [CX4H3][CX4]O                     | 0.6655 |
| [OX2H1][CX4H2][#6X3H0]            | 0.319  | [#6H1]                            | 0.7254 |
| [CX3H0](=[OX1H0])([OX2H1])[CX4H1] | 0.2715 | [CX4H2]([OX2H0])[CX4H3]           | 0.7587 |

---

Example 112 true smiles: CC(C)CCC(=O)O formula: C6H12O2  
Index of correct structure: 0 of 903  
True structure loss: 0.006743  
True structure:

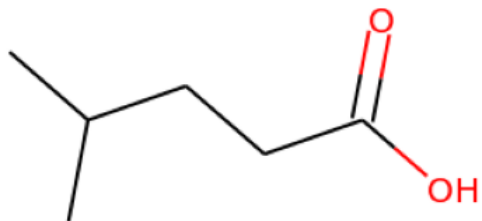

Experimental <sup>13</sup>C NMR (solvent: CDCl<sub>3</sub>)

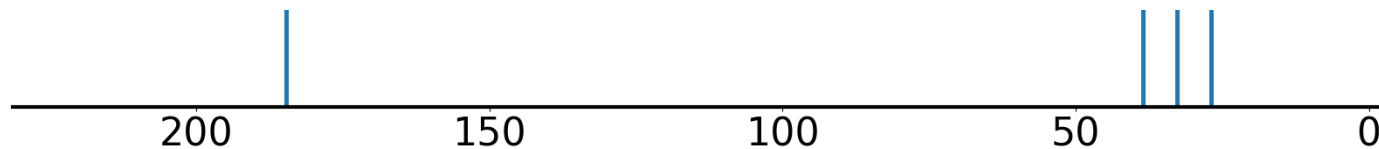

Experimental <sup>1</sup>H NMR (solvent: cdcl<sub>3</sub>)

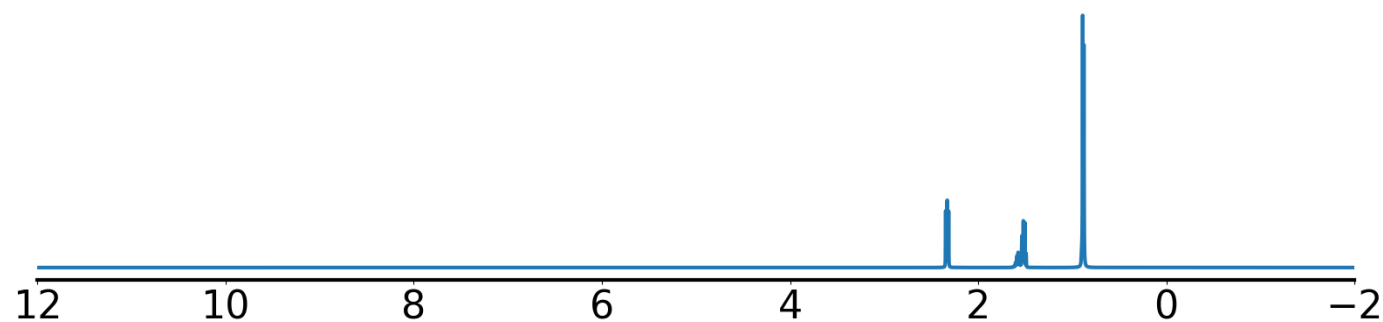

Top predicted structures (loss):

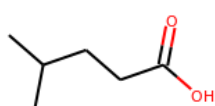

0.006743

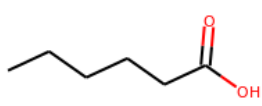

0.033622

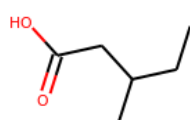

0.0486

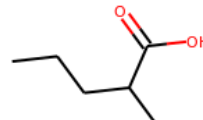

0.066608

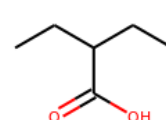

0.069353

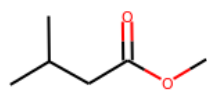

0.072996

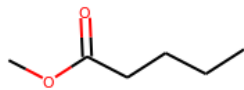

0.076831

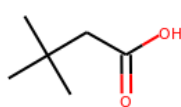

0.087612

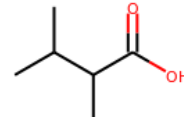

0.094259

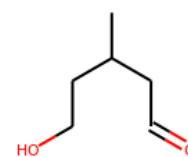

0.103345

|                                   |        |                                |        |
|-----------------------------------|--------|--------------------------------|--------|
| Top predicted substructures       | prob   |                                |        |
| [#6H3][#6][#6]                    | 1.0    | [#8]=[#6][#8]                  | 0.9914 |
| [CX4H2]([#6])[#6]                 | 0.9991 | [CX4H3][#6]                    | 0.9866 |
| [CX3](=O)[OX2H1]                  | 0.999  | [CX3](=[OX1])O                 | 0.985  |
| [CX4H3]                           | 0.9986 | [OX2H1]                        | 0.9754 |
| [CX3](=[OX1])C                    | 0.9974 | [CHX4]([CH3X4])[CH3X4]         | 0.9549 |
| best positives                    | prob   | best negatives                 | prob   |
| [#6H3][#6][#6]                    | 1.0    | C=CC=CC#C                      | 0.0    |
| [CX4H2]([#6])[#6]                 | 0.9991 | [CX2H1]#[CX2H0][CX3H1]=[CX3H0] | 0.0    |
| [CX3](=O)[OX2H1]                  | 0.999  | [CX2H0]([#CX2H1])[cX3H0]       | 0.0    |
| [CX4H3]                           | 0.9986 | CCC=CC#C                       | 0.0    |
| [CX3](=[OX1])C                    | 0.9974 | CCC#CC#C                       | 0.0    |
| [#8]=[#6][#8]                     | 0.9914 | [CX2H0]([#CX2H1])[CX4H0]       | 0.0    |
| [CX4H3][#6]                       | 0.9866 | [CX2H0]([#CX2H0])[CX2H0]       | 0.0    |
| [CX3](=[OX1])O                    | 0.985  | CC=CCC#C                       | 0.0    |
| [OX2H1]                           | 0.9754 | [CX4H3][CX2H0]                 | 0.0    |
| [CHX4]([CH3X4])[CH3X4]            | 0.9549 | CC#CCC#C                       | 0.0    |
| worst negatives                   | prob   | worst positives                | prob   |
| [CX4H2]([CX4H2])[CX4H2]           | 0.404  | [CX4H2]([CX4H2])[CX4H1]        | 0.5845 |
| [CX3H0](=[OX1H0])([OX2H1])[CX4H1] | 0.3546 | [#8][#6][#6H2]                 | 0.7081 |
| [CX4H2][CX4H2][CX4H2][CX4H2]      | 0.2974 | OCC[CH2]                       | 0.7314 |
| CCCCC                             | 0.277  | [CX4H2][CX4H2]                 | 0.7585 |
| O=[CX3H0][CX4H2][CX4H1]           | 0.1705 | [#6H1][#6H2]                   | 0.7799 |
| [#6X3][#6][#6][#6H3]              | 0.1614 | [CX4H2]CC=O                    | 0.8074 |
| [#8]=[#6][#6H2][#6H1]             | 0.1584 | [CX4H2][CX3]=O                 | 0.8337 |
| [CX4H2]([CX4H1])[CX3H0]           | 0.1343 | [CHX4]([CH3X4])[CH2X4]         | 0.8768 |
| [#8][#6H0][#6H1]                  | 0.0971 | [#6H1]                         | 0.8814 |
| [#8]=[#6H0][#6H1]                 | 0.0934 | [CX4H2]([CX4H2])[CX3H0]        | 0.8892 |

---

Example 113 true smiles: C=COCCCCO formula: C6H12O2  
Index of correct structure: 0 of 903  
True structure loss: 0.006823  
True structure:

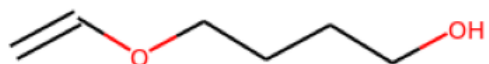

Experimental <sup>13</sup>C NMR (solvent: CDCl<sub>3</sub>)

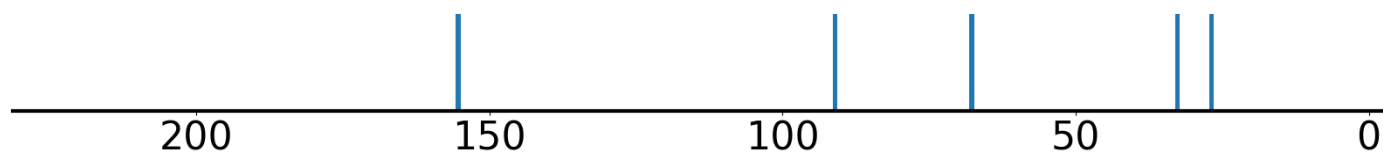

Experimental <sup>1</sup>H NMR (solvent: CDCl<sub>3</sub>)

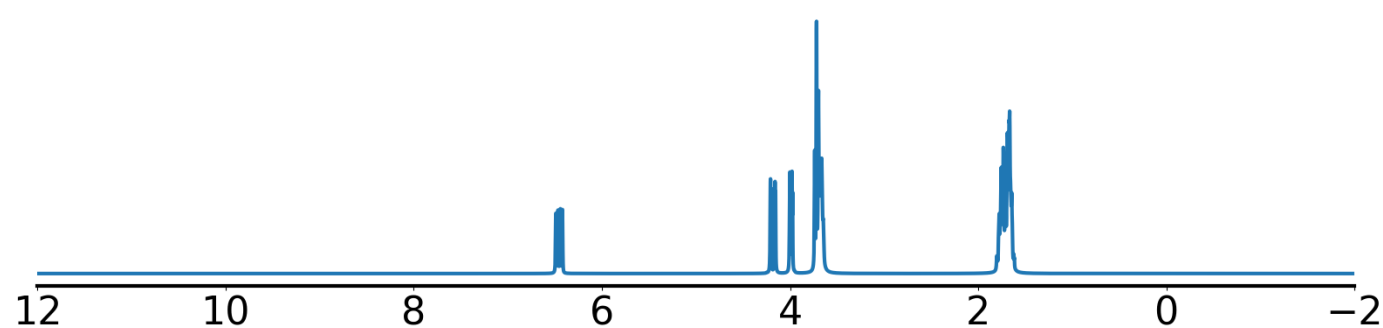

Top predicted structures (loss):

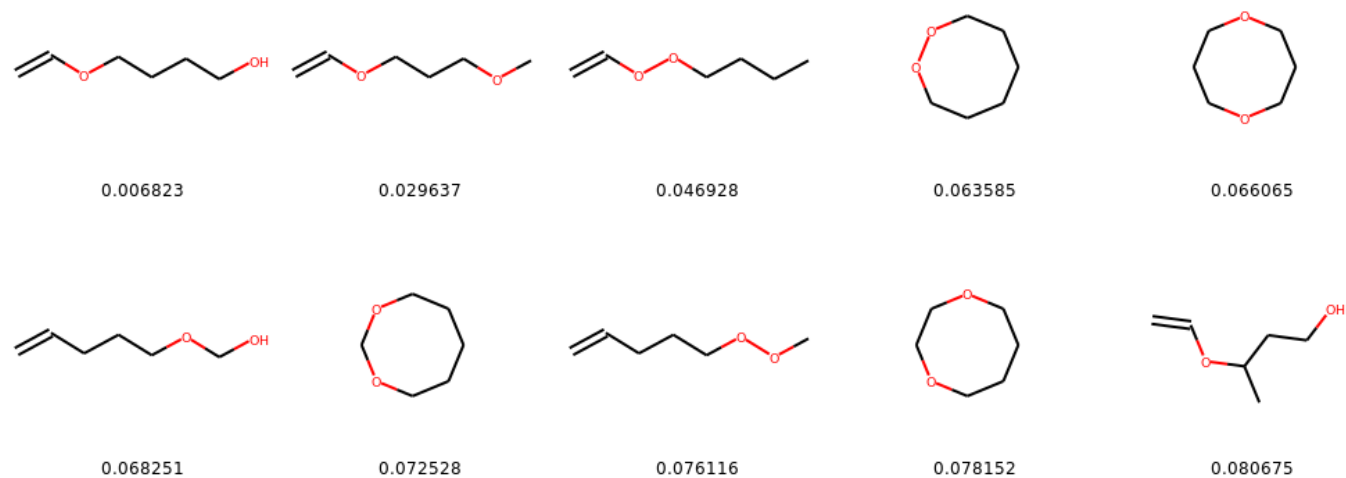

| Top predicted substructures | prob        |                                |             |
|-----------------------------|-------------|--------------------------------|-------------|
| [CX3H1](=[CX3H2])[OX2H0]    | 0.9999      | [CX4H2]([#6])[O]               | 0.9969      |
| [#8][#6]=[#6H2]             | 0.9998      | OCC[CH2]                       | 0.9961      |
| [#8][#6][#6H2]              | 0.9993      | [#6X3H2]                       | 0.9949      |
| [CH2X3](=C)                 | 0.9988      | [CH2X4](O)[CX4H2][CX4H2]       | 0.9938      |
| [CX4H2]([#6])[#6]           | 0.9983      | [CX3H2]=[CX3H1]                | 0.9918      |
| <b>best positives</b>       | <b>prob</b> | <b>best negatives</b>          | <b>prob</b> |
| [CX3H1](=[CX3H2])[OX2H0]    | 0.9999      | [CX2H0](#[CX2H1])[CX3H0]       | 0.0         |
| [#8][#6]=[#6H2]             | 0.9998      | [#6X2][#6H1][#6X2]             | 0.0         |
| [#8][#6][#6H2]              | 0.9993      | [#7][#6H1][#6X2]               | 0.0         |
| [CH2X3](=C)                 | 0.9988      | [#7][#6][#6][#6][#7]           | 0.0         |
| [CX4H2]([#6])[#6]           | 0.9983      | [CX2H0](#[CX2H0])[CX2H0]       | 0.0         |
| [CX4H2]([#6])[O]            | 0.9969      | C=CC=CC#C                      | 0.0         |
| OCC[CH2]                    | 0.9961      | [CX2H1]#[CX2H0][CX3H1]=[CX3H0] | 0.0         |
| [#6X3H2]                    | 0.9949      | CC#CCC#C                       | 0.0         |
| [CH2X4](O)[CX4H2][CX4H2]    | 0.9938      | [CX2H0](#[CX2H1])[CX4H2]       | 0.0         |
| [CX3H2]=[CX3H1]             | 0.9918      | [CX2H0](#[CX2H0])[CX4H0]       | 0.0         |
| <b>worst negatives</b>      | <b>prob</b> | <b>worst positives</b>         | <b>prob</b> |
| [CX4H2]([CX4H2])[CX4H1]     | 0.4017      | [#8][#6][#6][#6][#6][#8]       | 0.4203      |
| [#6H1][#6H2]                | 0.3617      | [CX4H2]([OX2H1])[CX4H2]        | 0.5112      |
| [#8H][#6H2][#6H1]           | 0.3321      | [#6H2][#8][#6H1]               | 0.6835      |
| [#8][#6][#6][#8]            | 0.2209      | [CX4H2]([OX2H0])[CX4H2]        | 0.7658      |
| [CX4H2]([CX4H2])[CX3H1]     | 0.2048      | [CX4H2][CX4H2][CX4H2][CX4H2]   | 0.9231      |
| O[CX4H][CX4H2]              | 0.2016      | [CX3H]O[CX4H2]                 | 0.9254      |
| [CHX3](=C)C                 | 0.1509      | [OX2H1]                        | 0.9329      |
| [CX4H2][CX3H]               | 0.1259      | [#6H1]                         | 0.9364      |
| [CX4H]O                     | 0.1192      | [CX3H](O)                      | 0.9484      |
| [#8][#6][#6H2][#8]          | 0.1084      | [CH2X4](O)[CX4H2]              | 0.9484      |

---

Example 114 true smiles: CC(=O)OC(C)(C)C formula: C6H12O2  
 Index of correct structure: 0 of 903  
 True structure loss: 0.007652  
 True structure:

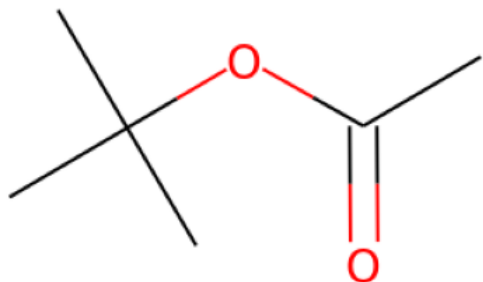

Experimental <sup>13</sup>C NMR (solvent: CDCl<sub>3</sub>)

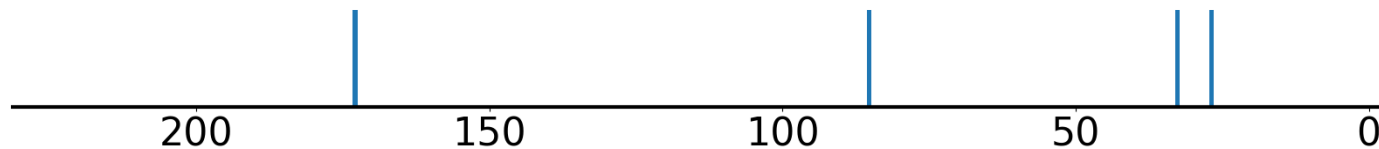

Experimental <sup>1</sup>H NMR (solvent: CDCl<sub>3</sub>)

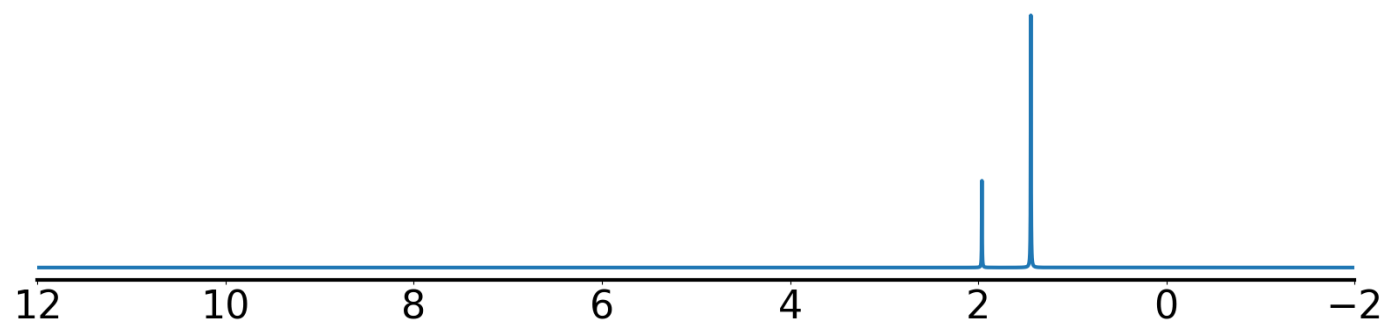

Top predicted structures (loss):

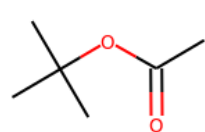

0.007652

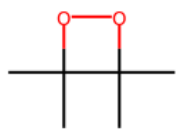

0.036201

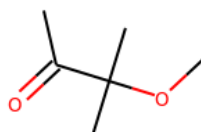

0.041301

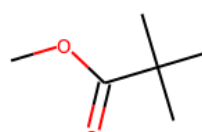

0.061614

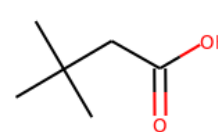

0.064295

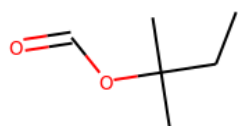

0.064928

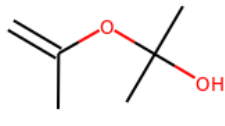

0.07172

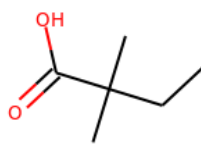

0.075579

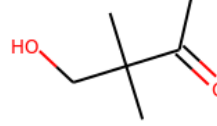

0.076905

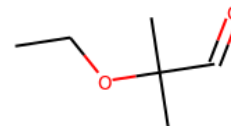

0.080629

| Top predicted substructures    | prob   |                                   |        |
|--------------------------------|--------|-----------------------------------|--------|
| [#6H3][#6H0]                   | 0.9996 | [CX4H3][#6]                       | 0.9958 |
| [CX4H3]                        | 0.9993 | [CX4H3][CX4H0][CX4H3]             | 0.9946 |
| [CX4H3][CX4H0]                 | 0.9987 | [CX4H3][CX3]                      | 0.9811 |
| [#6H3][#6][#6]                 | 0.9972 | [CX4H3][CX4H0]([CX4H3])[OX2H0]    | 0.9765 |
| [CX4H3][CX4]O                  | 0.9967 | [#8]=[#6][#8]                     | 0.9606 |
| <br>                           |        |                                   |        |
| best positives                 | prob   | best negatives                    | prob   |
| [#6H3][#6H0]                   | 0.9996 | [#7][#6][#6][#6][#7]              | 0.0    |
| [CX4H3]                        | 0.9993 | CCC#CC#C                          | 0.0    |
| [CX4H3][CX4H0]                 | 0.9987 | [#7][#6]=[#6][#6][#7]             | 0.0    |
| [#6H3][#6][#6]                 | 0.9972 | [CX2H0](#[CX2H0])[CX2H0]          | 0.0    |
| [CX4H3][CX4]O                  | 0.9967 | [CX2H0](#[CX2H1])[CX2H0]          | 0.0    |
| [CX4H3][#6]                    | 0.9958 | [CX4H1]([OX2H0])([CX4H1])[CX2H0]  | 0.0    |
| [CX4H3][CX4H0][CX4H3]          | 0.9946 | [CX3H1](=[CX3H2])[CX2H0]          | 0.0    |
| [CX4H3][CX3]                   | 0.9811 | [#7][#6H1][#6X2]                  | 0.0    |
| [CX4H3][CX4H0]([CX4H3])[OX2H0] | 0.9765 | [CX2H0](#[CX2H1])[cX3H0]          | 0.0    |
| [#8]=[#6][#8]                  | 0.9606 | [#6X2][#6H1][#6X2]                | 0.0    |
| <br>                           |        |                                   |        |
| worst negatives                | prob   | worst positives                   | prob   |
| [#8][#6][#6H2]                 | 0.5603 | [OX1H0]=[CX3H0][CX4H3]            | 0.7527 |
| OCC[CH2]                       | 0.5255 | [CX4]([CX4H3])([CX4H3])[CX4H3]    | 0.8171 |
| [OX2H1]                        | 0.4812 | [CX3H0](=[OX1H0])([OX2H0])[CX4H3] | 0.877  |
| [#6X4H3][#6][#8H]              | 0.2951 | [OX2H0][CX3H0][CX4H3]             | 0.9063 |
| [#8][#6][#6]=[#8]              | 0.2695 | [CH3][#6][#8]                     | 0.9194 |
| [CX4H2]([#6])[#6]              | 0.2636 | [CX3](=[OX1])C                    | 0.9364 |
| [CX4H2][CX4H2]                 | 0.2233 | [CX4H3][CX3H0]                    | 0.9375 |
| [CX3](=O)[OX2H1]               | 0.2005 | [CX3](=[OX1])O                    | 0.9389 |
| [#8][#6][#6]=[#6X3]            | 0.1911 | [#6H0]([#6H3])([#6H3])[#8]        | 0.9579 |
| [#8][#6H0][#6H1]               | 0.176  | [#8]=[#6][#8]                     | 0.9606 |

---

Example 115 true smiles: CC(C)CCC(=O)O formula: C6H12O2  
Index of correct structure: 0 of 903  
True structure loss: 0.007335  
True structure:



Experimental <sup>13</sup>C NMR (solvent: CDCl<sub>3</sub>)



Experimental <sup>1</sup>H NMR (solvent: CDCl<sub>3</sub>)

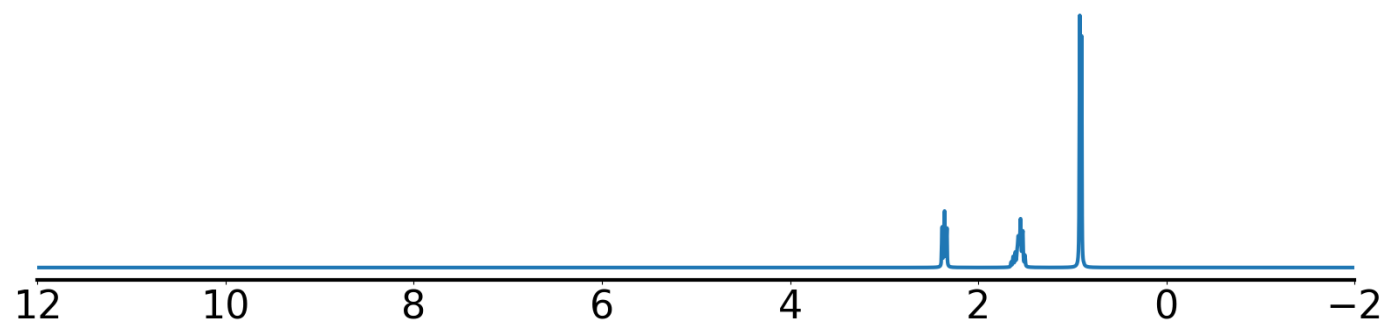

Top predicted structures (loss):

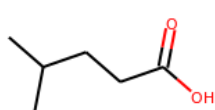

0.007335

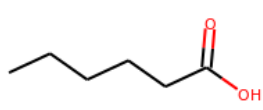

0.034777

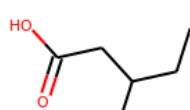

0.044111

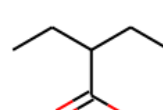

0.063887

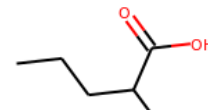

0.066391

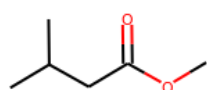

0.075492

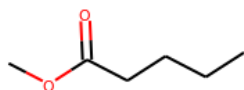

0.078784

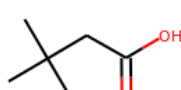

0.081609

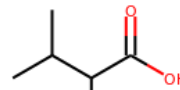

0.089869

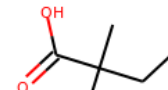

0.099078



|                                   |        |                                   |        |
|-----------------------------------|--------|-----------------------------------|--------|
| Top predicted substructures       | prob   |                                   |        |
| [#6H3][#6][#6]                    | 1.0    | [#8]=[#6][#8]                     | 0.9945 |
| [CX3](=O)[OX2H1]                  | 0.9996 | [CX4H3][#6]                       | 0.9865 |
| [CX4H3]                           | 0.9992 | [CX3](=[OX1])O                    | 0.9862 |
| [CX4H2]([#6])[#6]                 | 0.9981 | [OX2H1]                           | 0.978  |
| [CX3](=[OX1])C                    | 0.9976 | [OX1H0]=[CX3H0]([#8])[CX4H2]      | 0.9616 |
| best positives                    | prob   | best negatives                    | prob   |
| [#6H3][#6][#6]                    | 1.0    | [CX2H0](#[CX2H1])[CX3H0]          | 0.0    |
| [CX3](=O)[OX2H1]                  | 0.9996 | C=CC=CC#C                         | 0.0    |
| [CX4H3]                           | 0.9992 | [CX2H1]#[CX2H0][CX3H1]=[CX3H0]    | 0.0    |
| [CX4H2]([#6])[#6]                 | 0.9981 | [CX2H0](#[CX2H1])[CX4H0]          | 0.0    |
| [CX3](=[OX1])C                    | 0.9976 | [CX3H0](=[CX3H1])([OX2H0])[CX2H0] | 0.0    |
| [#8]=[#6][#8]                     | 0.9945 | CC=CCC#C                          | 0.0    |
| [CX4H3][#6]                       | 0.9865 | CCC#CC#C                          | 0.0    |
| [CX3](=[OX1])O                    | 0.9862 | CCC=CC#C                          | 0.0    |
| [OX2H1]                           | 0.978  | CC#CCC#C                          | 0.0    |
| [OX1H0]=[CX3H0]([#8])[CX4H2]      | 0.9616 | [CX2H0](#[CX2H0])[CX2H0]          | 0.0    |
| worst negatives                   | prob   | worst positives                   | prob   |
| [CX3H0](=[OX1H0])([OX2H1])[CX4H1] | 0.4638 | [CX4H2](#[CX4H2])[CX4H1]          | 0.7047 |
| CCCCC                             | 0.3535 | [#8][#6][#6H2]                    | 0.7051 |
| [CX4H2](#[CX4H2])[CX4H2]          | 0.2871 | [#6H1][#6H2]                      | 0.7086 |
| [CX4H2][CX4H2][CX4H2][CX4H2]      | 0.2199 | [CX4H2][CX4H2]                    | 0.7485 |
| [CX4H2](#[CX4H1])[CX3H0]          | 0.2009 | OCC[CH2]                          | 0.7533 |
| O=[CX3H0][CX4H2][CX4H1]           | 0.1997 | [CX4H2][CX3]=O                    | 0.7896 |
| [#6X3][#6][#6][#6H3]              | 0.1769 | [CHX4](#[CH3X4])[CH2X4]           | 0.8125 |
| [CX4H1](#[CX4H3])([CX4H2])[CX4H2] | 0.1685 | [CX4H2]CC=O                       | 0.8385 |
| [#8]=[#6][#6H2][#6H1]             | 0.1656 | [#6H1]                            | 0.9088 |
| [#8]=[#6H0][#6H1]                 | 0.1466 | [CX4H2](#[CX4H2])[CX3H0]          | 0.9167 |

---

Example 116 true smiles: OC1CCC(O)CC1 formula: C6H12O2  
Index of correct structure: 0 of 903  
True structure loss: 0.012793  
True structure:

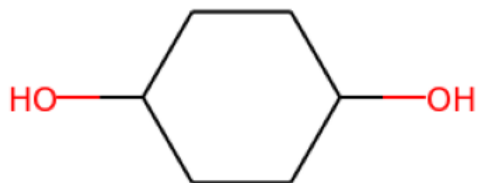

Experimental <sup>13</sup>C NMR (solvent: DMSO)

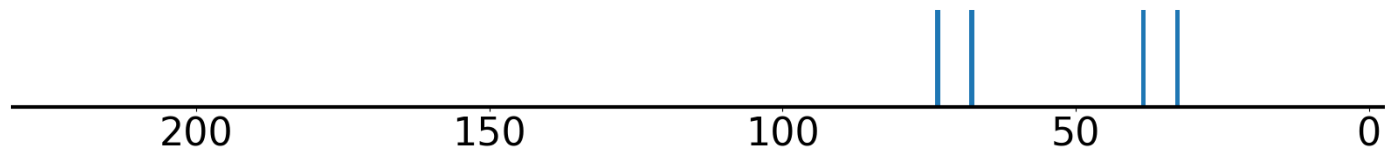

Experimental <sup>1</sup>H NMR (solvent: CDCl<sub>3</sub>)

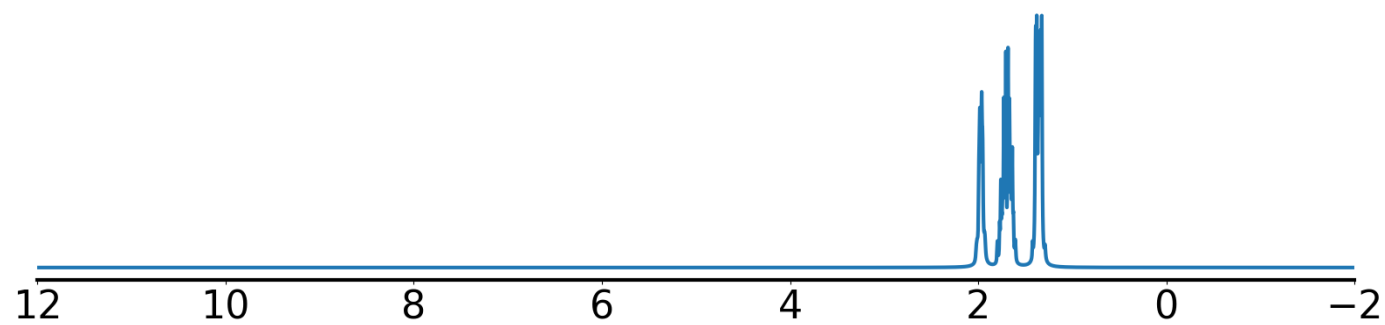

Top predicted structures (loss):

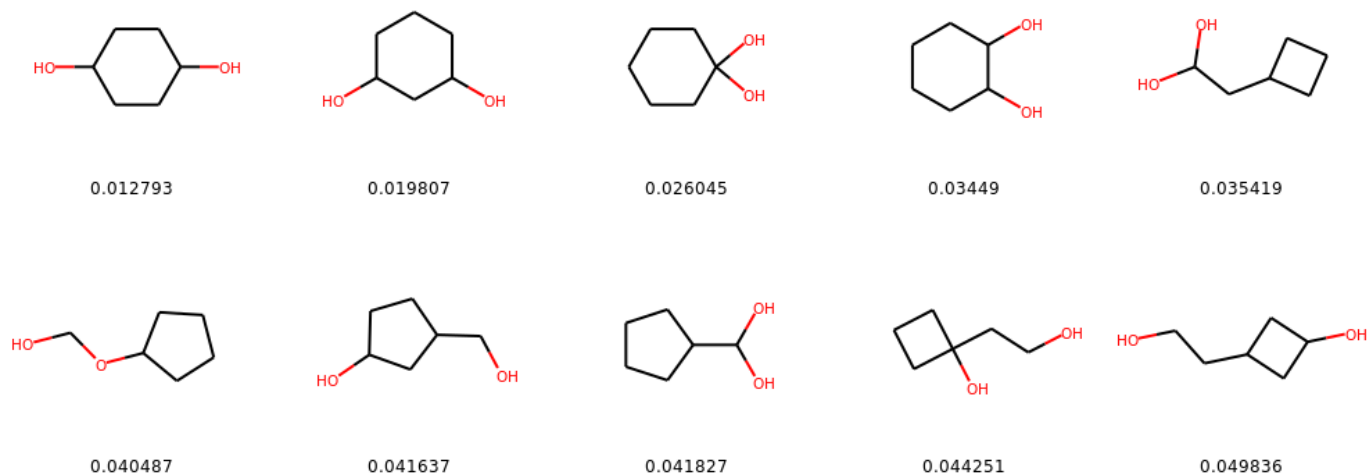

|                                  |        |                                   |        |
|----------------------------------|--------|-----------------------------------|--------|
| Top predicted substructures      | prob   |                                   |        |
| [CX4H2]([#6])[#6]                | 1.0    | [CX4H2]([CX4H2])[CX4H1]           | 0.9566 |
| OCC[CH2]                         | 0.9986 | [#6H1][#6H2]                      | 0.8993 |
| [OX2H1]                          | 0.9933 | CCCCC                             | 0.8891 |
| [#8][#6][#6H2]                   | 0.988  | [#6H1]                            | 0.853  |
| [CX4H2][CX4H2]                   | 0.9741 | [#6X4H2][#6H1][#8H]               | 0.852  |
| best positives                   | prob   | best negatives                    | prob   |
| [CX4H2]([#6])[#6]                | 1.0    | [CX3H0](=[CX3H1])([OX2H0])[CX2H0] | 0.0    |
| OCC[CH2]                         | 0.9986 | CC#CCC=C                          | 0.0    |
| [OX2H1]                          | 0.9933 | [CX2H1]#[CX2H0][CX3H1]=[CX3H0]    | 0.0    |
| [#8][#6][#6H2]                   | 0.988  | C=CC=CC#C                         | 0.0    |
| [CX4H2][CX4H2]                   | 0.9741 | [CX2H0](#[NX1H0])[CX3H1]          | 0.0    |
| [CX4H2]([CX4H2])[CX4H1]          | 0.9566 | [#6X2][#6H1][#6X2]                | 0.0    |
| [#6H1][#6H2]                     | 0.8993 | [CX2H0](#[CX2H1])[CX3H0]          | 0.0    |
| CCCCC                            | 0.8891 | CC=CCC#C                          | 0.0    |
| [#6H1]                           | 0.853  | [CX3H0](=[CX3H1])([CX4H1])[CX2H0] | 0.0    |
| [#6X4H2][#6H1][#8H]              | 0.852  | [CX2H0](#[CX2H0])[CX3H1]          | 0.0    |
| worst negatives                  | prob   | worst positives                   | prob   |
| [CX4H2]([CX4H2])[CX4H2]          | 0.6622 | [#6H1][#6H2][#6H2][#6H1]          | 0.2112 |
| [#8][#6H0][#6H1]                 | 0.411  | [CX4H1][CX4H2][CX4H2][CX4H1]      | 0.478  |
| [CX4H2]([CX4H2])[CX4H0]          | 0.3947 | [OH][CX4H]                        | 0.5191 |
| [CX4H2][CX4H2][CX4H2][CX4H2]     | 0.3146 | [#8][#6][#6][#6][#6][#8]          | 0.52   |
| [CX4H1]([CX4H2])([CX4H2])[CX4H2] | 0.2233 | [CX4H]O                           | 0.5359 |
| [OX2H1][CX4H0][CX4H2][CX4H2]     | 0.2213 | [#6H1]([#6H2])[#6H2]              | 0.6636 |
| [#8][#6][#6][#8]                 | 0.2099 | [#6]1[#6][#6][#6][#6][#6]1        | 0.7286 |
| [CX4H1]([OX2H1])([CX4H2])[CX4H1] | 0.2015 | O[CX4H][CX4H2]                    | 0.7783 |
| [CX4H3][CX4]O                    | 0.1937 | [CX4H1]([OX2H1])([CX4H2])[CX4H2]  | 0.7806 |
| [CX4H2]([CX4H1])[CX4H1]          | 0.1927 | [#6X4H2][#6H1][#8H]               | 0.852  |

---

Example 117 true smiles: COC(OC)N(C)C formula: C5H13NO2  
Index of correct structure: 0 of 900  
True structure loss: 0.022358  
True structure:

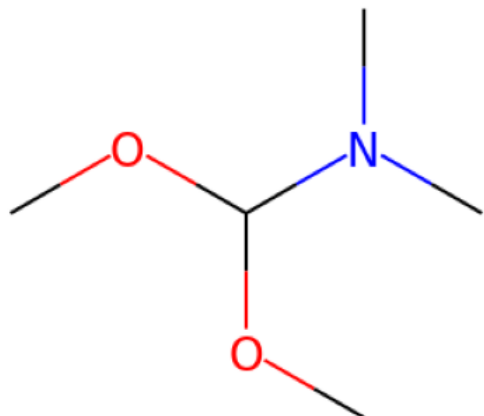

Experimental <sup>13</sup>C NMR (solvent: CCl<sub>4</sub>)

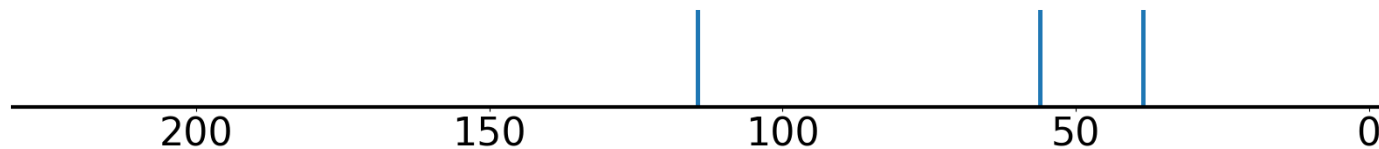

Experimental <sup>1</sup>H NMR (solvent: CDCl<sub>3</sub>)

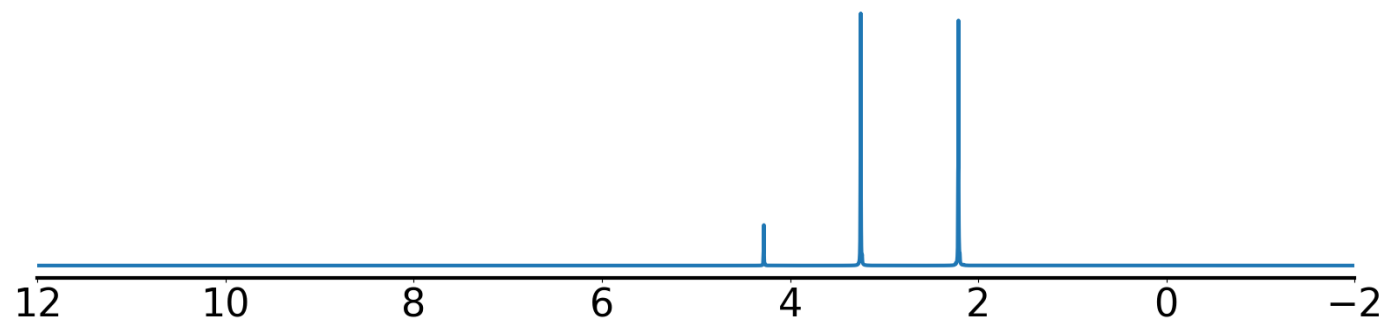

Top predicted structures (loss):

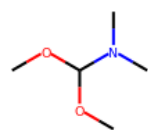

0.022358

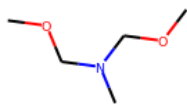

0.022391

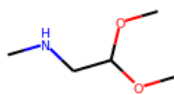

0.029448

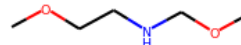

0.034865

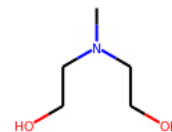

0.034961

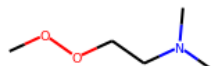

0.035292

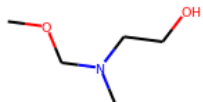

0.036968

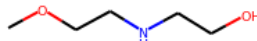

0.037916

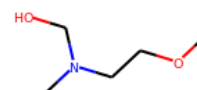

0.040704

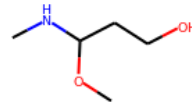

0.042838

|                             |        |                                |        |
|-----------------------------|--------|--------------------------------|--------|
| Top predicted substructures | prob   |                                |        |
| [CX4H3]                     | 0.9868 | [#7X3][#6H3]                   | 0.7403 |
| [#7X3][#6H2]                | 0.8904 | [CX4H3][OX2H0]                 | 0.6847 |
| [#7][#6H2]                  | 0.8376 | [#6H3][#7]                     | 0.6589 |
| [#8][#6][#6H2]              | 0.8367 | [CX4H2]([#6])[O]               | 0.5379 |
| [OX2H0][CX4H1][OX2H0]       | 0.8311 | [#6H3][#7][#6H2]               | 0.5316 |
| best positives              | prob   | best negatives                 | prob   |
| [CX4H3]                     | 0.9868 | [#6X2][#6H1][#6X2]             | 0.0    |
| [OX2H0][CX4H1][OX2H0]       | 0.8311 | CCC=CC#C                       | 0.0    |
| [#7X3][#6H3]                | 0.7403 | [OX1H0]=[CX3H0][CX2H0]#[CX2H1] | 0.0    |
| [CX4H3][OX2H0]              | 0.6847 | [CX2H1]#[CX2H0][CX3H1]=[CX3H0] | 0.0    |
| [#6H3][#7]                  | 0.6589 | CC=CCC#C                       | 0.0    |
| [CX4H]O                     | 0.3619 | [CX2H0]([#CX2H0])[CX2H0]       | 0.0    |
| [CX4H3][NX3H0]              | 0.342  | [CX2H0]([#CX2H1])[CX3H0]       | 0.0    |
| [#6H1]                      | 0.0901 | [CX2H0]([#CX2H1])[CX4H2]       | 0.0    |
| [#7X3H0]                    | 0.0888 | CC=CC#CC                       | 0.0    |
| worst negatives             | prob   | worst positives                | prob   |
| [#7X3][#6H2]                | 0.8904 | [#7X3H0]                       | 0.0888 |
| [#7][#6H2]                  | 0.8376 | [#6H1]                         | 0.0901 |
| [#8][#6][#6H2]              | 0.8367 | [CX4H3][NX3H0]                 | 0.342  |
| [CX4H2]([#6])[O]            | 0.5379 | [CX4H]O                        | 0.3619 |
| [#6H3][#7][#6H2]            | 0.5316 | [#6H3][#7]                     | 0.6589 |
| [CX4H2][CX4H2]              | 0.5118 | [CX4H3][OX2H0]                 | 0.6847 |
| [OX2H1]                     | 0.5003 | [#7X3][#6H3]                   | 0.7403 |
| OCC[CH2]                    | 0.4523 | [OX2H0][CX4H1][OX2H0]          | 0.8311 |
| [#7H2][#6H2]                | 0.3649 | [CX4H3]                        | 0.9868 |

---

Example 118 true smiles: CN(C)CC(=O)O formula: C4H9NO2  
 Index of correct structure: 0 of 896  
 True structure loss: 0.018376  
 True structure:

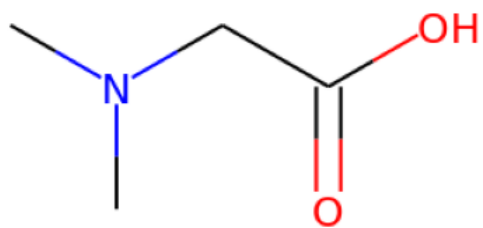

Experimental <sup>13</sup>C NMR (solvent: D2O)

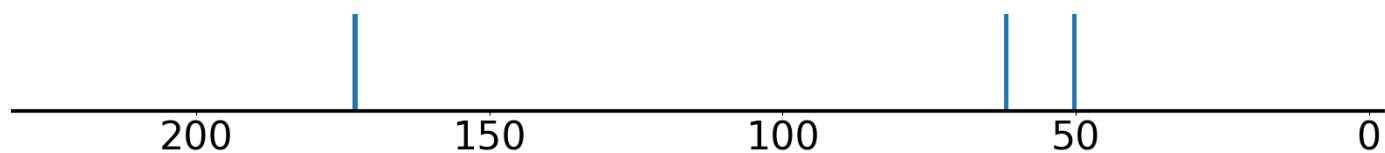

Experimental <sup>1</sup>H NMR (solvent: D2O)

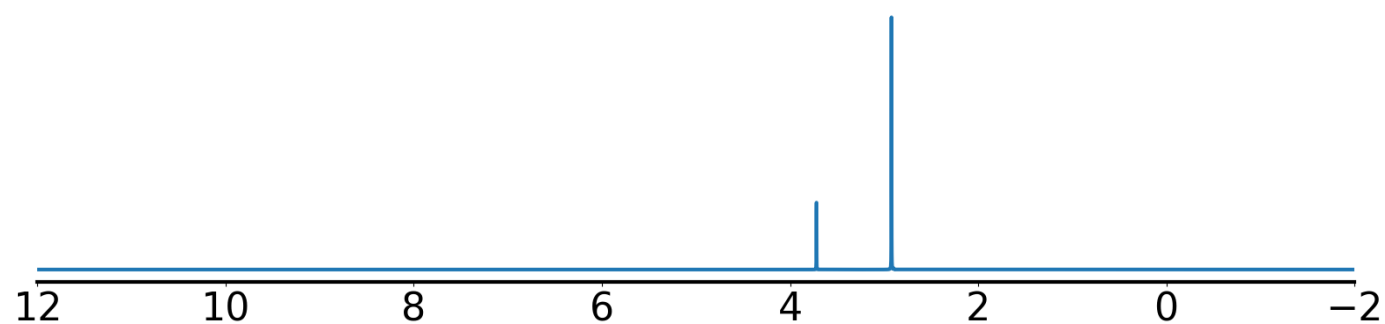

Top predicted structures (loss):

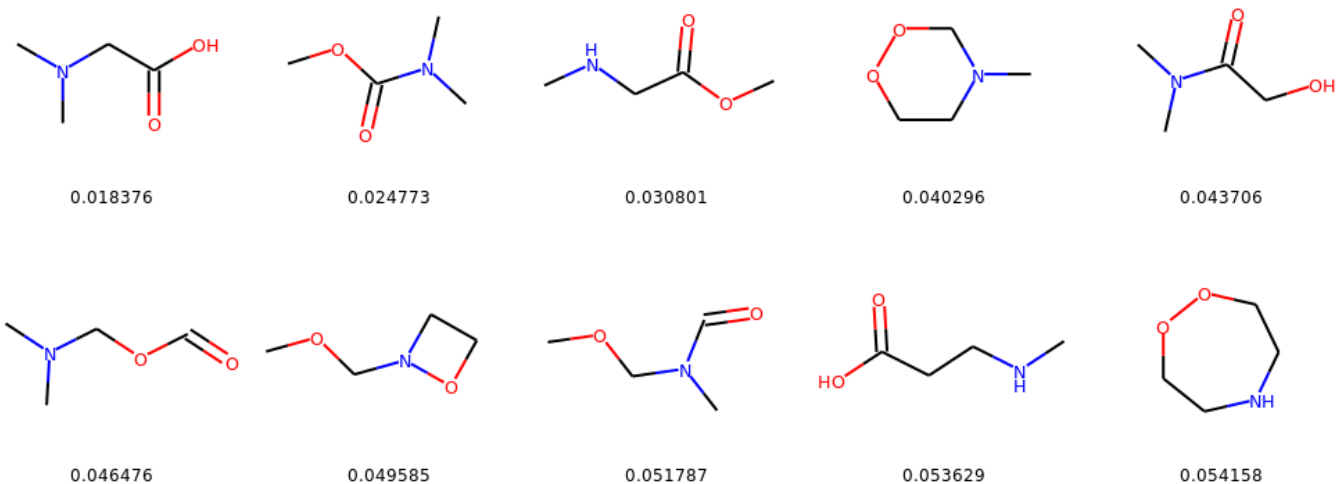

Top predicted substructures  
 [CX4H3]

prob  
 0.9839

[CX4H3][NX3H0]

0.8289

|                               |        |                                        |        |
|-------------------------------|--------|----------------------------------------|--------|
| [#7X3][#6H3]                  | 0.9544 | [#6H3][#7][#6H2]                       | 0.8185 |
| [CX3](=[OX1])C                | 0.9517 | [CX3](=[OX1])O                         | 0.7896 |
| [#6H3][#7]                    | 0.9203 | [#7X3H0]                               | 0.7793 |
| [#8]=[#6][#8]                 | 0.8577 | [#7][#6H2]                             | 0.7557 |
| best positives                | prob   | best negatives                         | prob   |
| [CX4H3]                       | 0.9839 | C=CCC#C                                | 0.0    |
| [#7X3][#6H3]                  | 0.9544 | CCC#CC#C                               | 0.0    |
| [CX3](=[OX1])C                | 0.9517 | [CX2H0](#[CX2H1])[CX2H0]               | 0.0    |
| [#6H3][#7]                    | 0.9203 | [CX2H0](#[CX2H0])[CX2H0]               | 0.0    |
| [#8]=[#6][#8]                 | 0.8577 | CC=CC#CC                               | 0.0    |
| [CX4H3][NX3H0]                | 0.8289 | [CX2H0](#[CX2H0])[CX3H1]               | 0.0    |
| [#6H3][#7][#6H2]              | 0.8185 | [CX4H1]( [CX4H2] ) ( [CX4H1] ) [CX2H0] | 0.0    |
| [CX3](=[OX1])O                | 0.7896 | [CX2H0](#[CX2H0])[CX4H1]               | 0.0    |
| [#7X3H0]                      | 0.7793 | [CX3H1](=[CX3H2])[CX2H0]               | 0.0    |
| [#7][#6H2]                    | 0.7557 | CCC#CC=C                               | 0.0    |
| worst negatives               | prob   | worst positives                        | prob   |
| [CX4H3][OX2H0]                | 0.5766 | [CX3H0](=[OX1H0])( [OX2H1] ) [CX4H2]   | 0.1351 |
| [#6H3][#7][#6X3]              | 0.3678 | [OX2H1]                                | 0.2571 |
| [#6H2][#7][#6X3]              | 0.3098 | [CX3](=O)[OX2H1]                       | 0.3188 |
| [#8][#6][#6]=[#8]             | 0.2945 | [#7][#6][#6X3]                         | 0.4147 |
| [#7X3H1]                      | 0.2937 | [OX1H0]=[CX3H0]( [ #8 ] ) [CX4H2]      | 0.4513 |
| [CX4H2]( [ #6 ] ) [O]         | 0.2519 | [#6X3][#6H2][#7]                       | 0.4727 |
| [OX1H0]=[CX3H0][OX2H0][CX4H3] | 0.2169 | [CX4H2]( [NX3H0] ) [CX3H0]             | 0.6611 |
| [#8]=[#6H0][#6H1]             | 0.2107 | [#8][#6][#6H2]                         | 0.6755 |
| [#8][#6][#6][#6X3]            | 0.2044 | [#7X3][#6H2]                           | 0.7197 |
| [CH2X4](O)[CX4H2]             | 0.1983 | [CX4H2][CX3]=O                         | 0.7255 |

---

Example 119 true smiles: CC(C)(N)C(=O)O formula: C4H9NO2  
 Index of correct structure: 0 of 896  
 True structure loss: 0.010581  
 True structure:

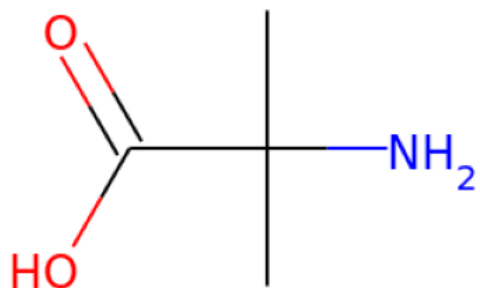

Experimental <sup>13</sup>C NMR (solvent: D<sub>2</sub>O)

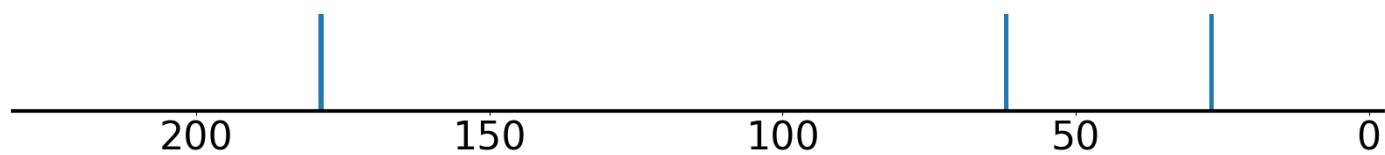

Experimental <sup>1</sup>H NMR (solvent: D<sub>2</sub>O)

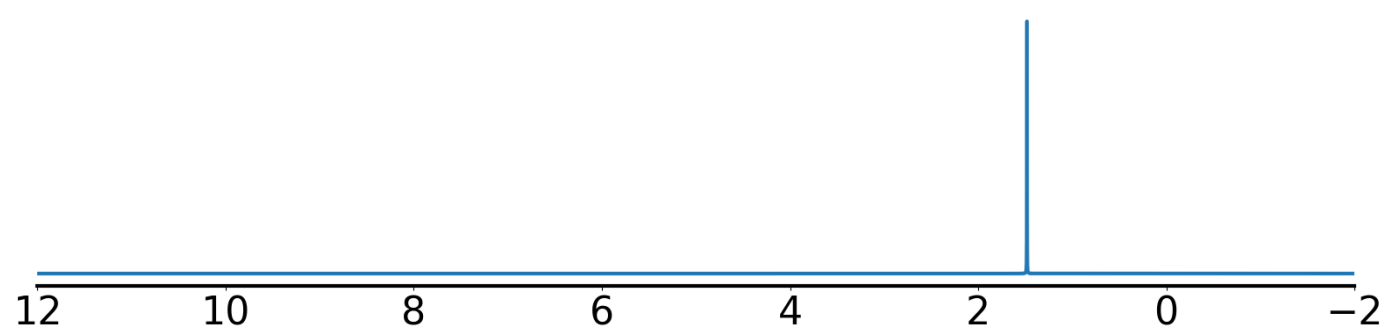

Top predicted structures (loss):

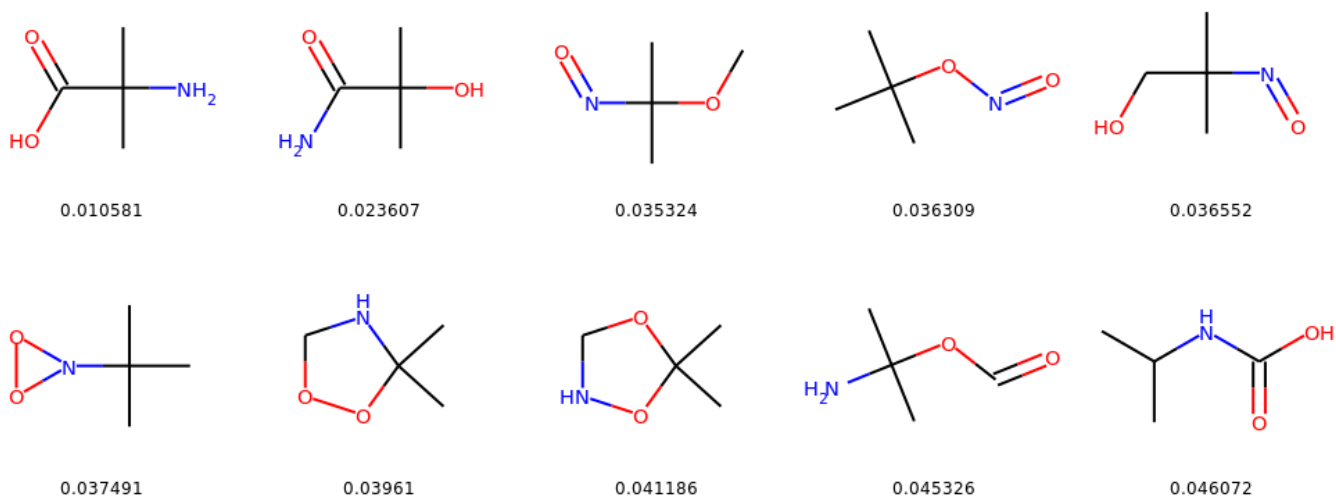

Top predicted substructures  
 [#6H3][#6][#6]

prob  
 0.998

[CX4H3][#6]

0.9769



|                                   |        |                                        |        |
|-----------------------------------|--------|----------------------------------------|--------|
| [CX4H3]                           | 0.9966 | [CX3](=[OX1])C                         | 0.9693 |
| [OX1H0]=[CX3H0][CX4H0][CX4H3]     | 0.9952 | [#6H3][#6H0]                           | 0.9646 |
| [CX4H3][CX4H0]                    | 0.9883 | [#7][#6][#6H3]                         | 0.8187 |
| [CX4H3][CX4H0][CX4H3]             | 0.9867 | [OX2H1]                                | 0.8171 |
| best positives                    | prob   | best negatives                         | prob   |
| [#6H3][#6][#6]                    | 0.998  | C=CCCC#C                               | 0.0    |
| [CX4H3]                           | 0.9966 | [CX2H1]#[CX2H0][CX3H1]=[CX3H0]         | 0.0    |
| [OX1H0]=[CX3H0][CX4H0][CX4H3]     | 0.9952 | CC=CCC#C                               | 0.0    |
| [CX4H3][CX4H0]                    | 0.9883 | CCC=CC#C                               | 0.0    |
| [CX4H3][CX4H0][CX4H3]             | 0.9867 | CC=CC#CC                               | 0.0    |
| [CX4H3][#6]                       | 0.9769 | [#6H2]=[#6][#6X2]                      | 0.0    |
| [CX3](=[OX1])C                    | 0.9693 | [OX1H0]=[CX3H0]1[CX4H1][CX4H1][CX4H2]1 | 0.0    |
| [#6H3][#6H0]                      | 0.9646 | [CX3H1](=[CX3H1])[CX2H0]               | 0.0    |
| [#7][#6][#6H3]                    | 0.8187 | [CX3H0](=[CX3H1])([CX4H2])[CX2H0]      | 0.0    |
| [OX2H1]                           | 0.8171 | [CX3H0](=[CX3H1])([OX2H0])[CX2H0]      | 0.0    |
| worst negatives                   | prob   | worst positives                        | prob   |
| [CX4H3][CX4]O                     | 0.6106 | [CH3]CC[OH]                            | 0.1509 |
| [#8][#6][#6]=[#8]                 | 0.4852 | [#7H2][#6H0]                           | 0.569  |
| [CH3][#6][#8]                     | 0.2555 | [CX3](=O)[OX2H1]                       | 0.5965 |
| [#7X3H1]                          | 0.1904 | [#7][#6][#6X3]                         | 0.6135 |
| [CX3H0](=[OX1H0])([OX2H1])[CX4H1] | 0.154  | [#6H3][#6][#6X3]                       | 0.6418 |
| [#6X4H3][#6][#8H]                 | 0.1539 | [CX3](=[OX1])O                         | 0.7782 |
| [CX3H0](=[OX1H0])([OX2H0])[CX4H0] | 0.1486 | [#8]=[#6][#8]                          | 0.801  |
| [#8][#6][#6][#6X3]                | 0.137  | [#7X3H2]                               | 0.8151 |
| [#8]=[#6H0][#6H1]                 | 0.1316 | [OX2H1]                                | 0.8171 |
| [CX4H2]CC=O                       | 0.1212 | [#7][#6][#6H3]                         | 0.8187 |

---

Example 120 true smiles: OCC1CCCN1 formula: C5H11NO  
 Index of correct structure: 0 of 864  
 True structure loss: 0.017582  
 True structure:

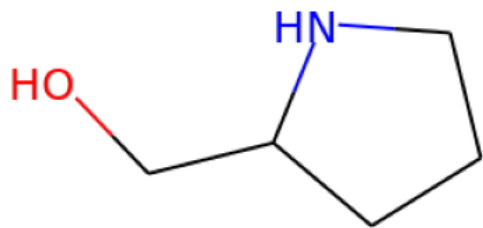

Experimental <sup>13</sup>C NMR (solvent: CDCl<sub>3</sub>)

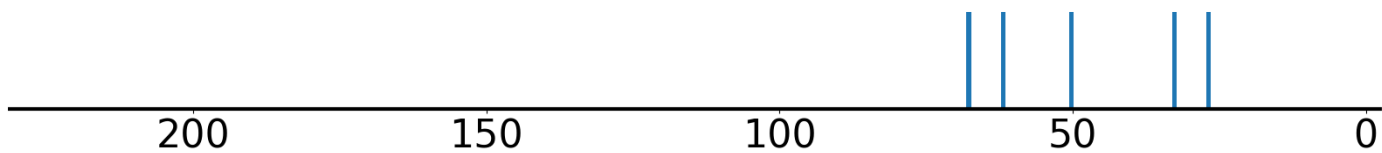

Experimental <sup>1</sup>H NMR (solvent: CDCl<sub>3</sub>)

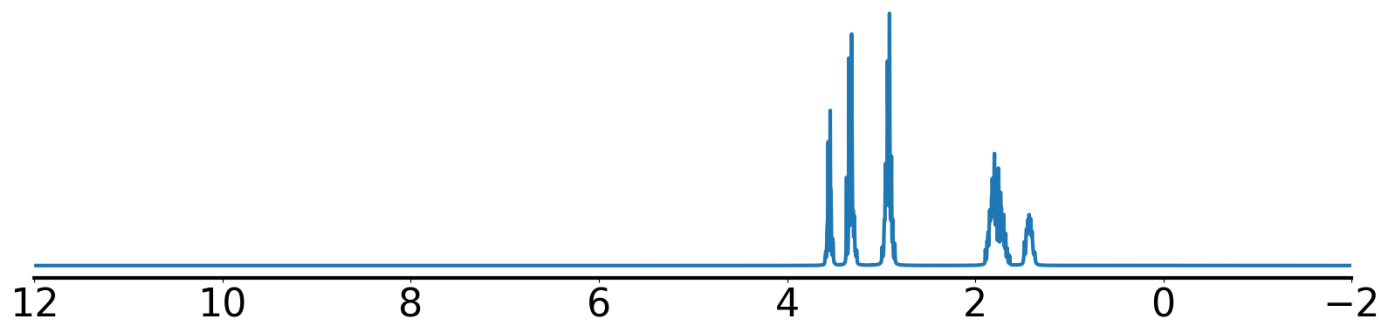

Top predicted structures (loss):

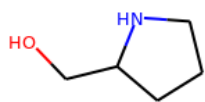

0.017582

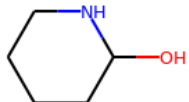

0.029427

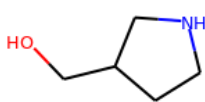

0.033329

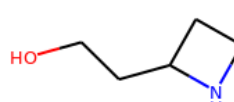

0.033571

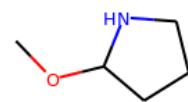

0.035319

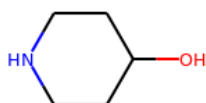

0.036991

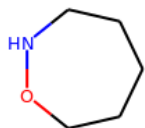

0.037958

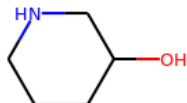

0.03799

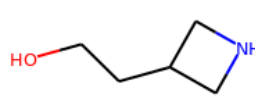

0.040106

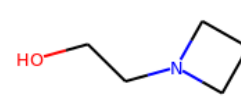

0.041079

Top predicted substructures  
 [CX4H2][[#6]][#6]

prob  
 0.9998

[#7][#6H2][#6H2]

0.9635

|                              |             |                                    |             |
|------------------------------|-------------|------------------------------------|-------------|
| [#7X3][#6H2]                 | 0.9973      | [CX4H2][CX4H2]                     | 0.9607      |
| [CX4H2]([CX4H2])[CX4H1]      | 0.9937      | [#6H1]                             | 0.9599      |
| [#7][#6H2]                   | 0.9882      | [#6H1][#6H2]                       | 0.9563      |
| OCC[CH2]                     | 0.9659      | [OX2H1]                            | 0.9499      |
| <b>best positives</b>        | <b>prob</b> | <b>best negatives</b>              | <b>prob</b> |
| [CX4H2]([#6])[#6]            | 0.9998      | [CX3H0](=[CX3H1])([OX2H0])[CX2H0]  | 0.0         |
| [#7X3][#6H2]                 | 0.9973      | C=CC=CC#C                          | 0.0         |
| [CX4H2]([CX4H2])[CX4H1]      | 0.9937      | C=CCCC#C                           | 0.0         |
| [#7][#6H2]                   | 0.9882      | [CX3H0](=[CX3H1])([CX4H1])[CX2H0]  | 0.0         |
| OCC[CH2]                     | 0.9659      | [CX2H1]#[CX2H0][CX3H1]=[CX3H0]     | 0.0         |
| [#7][#6H2][#6H2]             | 0.9635      | CC=CC#CC                           | 0.0         |
| [CX4H2][CX4H2]               | 0.9607      | CC#CCC=C                           | 0.0         |
| [#6H1]                       | 0.9599      | [CX3H1](=[CX3H1])[CX2H0]           | 0.0         |
| [#6H1][#6H2]                 | 0.9563      | [#6X3H1]=[#6X3H1][#6X3H0]=[#6X3H1] | 0.0         |
| [OX2H1]                      | 0.9499      | [CX3H1](=[CX3H2])[CX2H0]           | 0.0         |
| <b>worst negatives</b>       | <b>prob</b> | <b>worst positives</b>             | <b>prob</b> |
| [#8][#6][#6H2]               | 0.7279      | [CX4H2](O)[CHX4]                   | 0.3232      |
| [CH2X4](O)[CX4H2]            | 0.4326      | [#6H1r5][#7]                       | 0.3537      |
| [#6H1][#6H1]                 | 0.3638      | [#7X3H1]                           | 0.425       |
| [#6]1[#6][#6][#6][#7]1       | 0.351       | [CX4H1]([NX3H1])([CX4H2])[CX4H2]   | 0.4256      |
| CCCCC                        | 0.3119      | [#6]1[#6][#6][#6][#7]1             | 0.4421      |
| [#6H2][#7][#6H2]             | 0.2833      | [#8H][#6H2][#6H1]                  | 0.4455      |
| O[CX4H][CX4H2]               | 0.2463      | [#6H1]([#6H2])[#6H2]               | 0.4624      |
| [CX4H2][CX4H2][CX4H2][CX4H2] | 0.2156      | [#6H1][#6H2][#6][#6][#7]           | 0.4735      |
| [CH2X4](O)[CX4H2][CX4H2]     | 0.2076      | [CX4H2]([OX2H1])[CX4H1]            | 0.5672      |
| [CX4H2]([OX2H1])[CX4H2]      | 0.2025      | [#7][#6H1][#6H2r5]                 | 0.6475      |

---

Example 121 true smiles: Cc1ccc(O)cc1 formula: C7H8O  
Index of correct structure: 0 of 746  
True structure loss: 0.009113  
True structure:

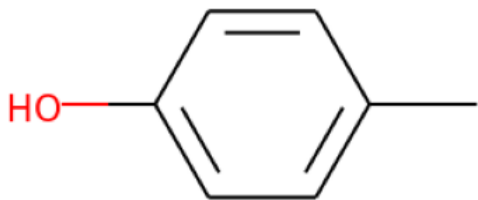

Experimental <sup>13</sup>C NMR (solvent: CDCl<sub>3</sub>)

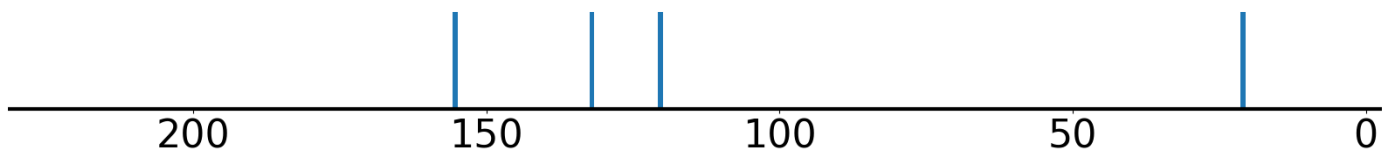

Experimental <sup>1</sup>H NMR (solvent: D<sub>2</sub>O)

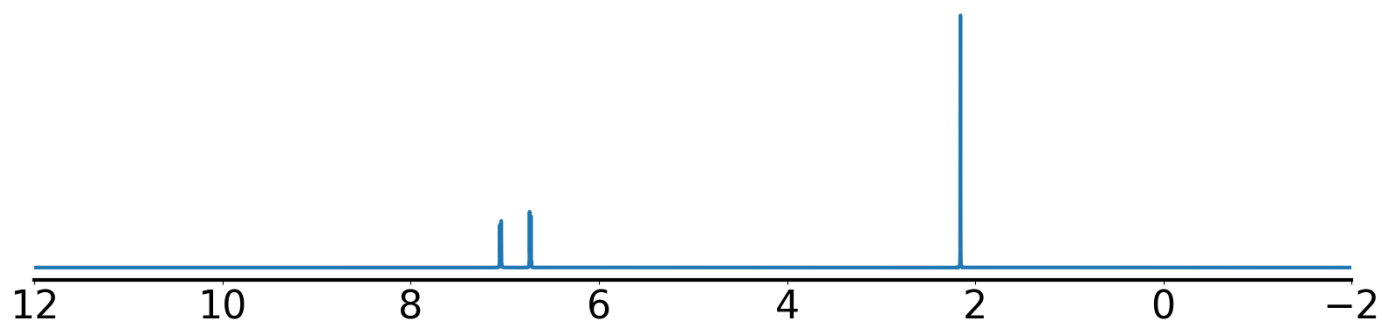

Top predicted structures (loss):

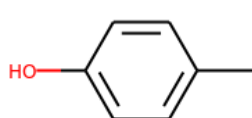

0.009113

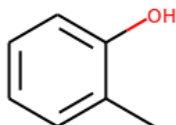

0.010147

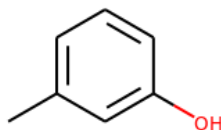

0.014736

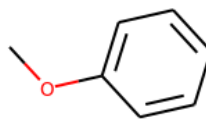

0.038704

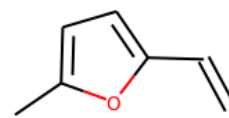

0.052758

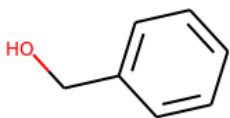

0.064249

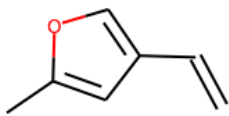

0.070765

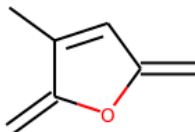

0.071045

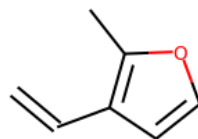

0.071726

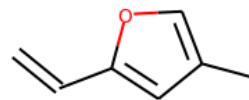

0.07184

Top predicted substructures  
[#6X3][#6X3]

prob  
0.9987

[#6H3][#6][#6]

0.9822

|                                  |        |                                             |        |
|----------------------------------|--------|---------------------------------------------|--------|
| [#6X3][#6X3][#6X3][#6X3]         | 0.9973 | [cH][cH]                                    | 0.9801 |
| [#6H1]                           | 0.9971 | [#6X3H1][#6X3H0]                            | 0.9753 |
| [CX4H3][#6]                      | 0.9935 | [#6H3][#6H0]                                | 0.9711 |
| [CX4H3]                          | 0.9914 | [#6]1[#6][#6][#6][#6]1                      | 0.9661 |
| best positives                   | prob   | best negatives                              | prob   |
| [#6X3][#6X3]                     | 0.9987 | [OX2H0]1[CX4H2][CX4H2][CX4H1][CX4H1]1       | 0.0    |
| [#6X3][#6X3][#6X3][#6X3]         | 0.9973 | [#8][#6H1][#6H2][#6H1]=[#8]                 | 0.0    |
| [#6H1]                           | 0.9971 | [CX4H1]([NX3H2])([CX4H2])([CX3H1])          | 0.0    |
| [CX4H3][#6]                      | 0.9935 | [OX1H0]=[CX3H0]1[CX4H1][CX4H1][CX4H2]1      | 0.0    |
| [CX4H3]                          | 0.9914 | [CX4H0]([NX3H1])([CX4H3])([CX4H2])([CX4H1]) | 0.0    |
| [#6H3][#6][#6]                   | 0.9822 | [CX4H0]([NX3H1])([CX4H2])([CX4H2])([CX4H1]) | 0.0    |
| [cH][cH]                         | 0.9801 | [CX4H1]([NX3H1])([CX4H3])([CX4H2])          | 0.0    |
| [#6X3H1][#6X3H0]                 | 0.9753 | [CX4H1]([NX3H0])([CX4H2])([CX4H0])          | 0.0    |
| [#6H3][#6H0]                     | 0.9711 | [#6H3][#6H1][#7][#7]                        | 0.0    |
| [#6]1[#6][#6][#6][#6]1           | 0.9661 | [CX4H1]([OX2H1])([CX4H2])([CX2H0])          | 0.0    |
| worst negatives                  | prob   | worst positives                             | prob   |
| [cX3H1]([cX3H1])([cX3H1])        | 0.7674 | [OX2H1]                                     | 0.534  |
| [cX3H0]([cX3H1])([cX3H0])[CX4H3] | 0.5336 | [#6X3H1][#6X3H1][#6X3H0][#6X3H1]            | 0.5378 |
| [cX3H1]([cX3H0])([cX3H0])        | 0.2326 | [#8][#6][#6][#6X3]                          | 0.6178 |
| [cX3H0]([cX3H1])([cX3H0])[OX2H1] | 0.2013 | [OX2H][cX3]:[c]                             | 0.6537 |
| [CH3][#6][#8]                    | 0.1295 | [#8][#6H0][#6H1]                            | 0.6667 |
| [#6X3][#6]=[#6][#6H3]            | 0.1127 | [cX3H0][cX3H1][cX3H1][cX3H0]                | 0.6875 |
| [#6H3][#6]=[#6X3]                | 0.1111 | [cH]cO                                      | 0.7683 |
| [cX3H0][cX3H1][cX3H0][OX2H1]     | 0.0968 | [#6H1][#6H1]                                | 0.8509 |
| [CHX3]=[CHX3]                    | 0.0938 | [#6H3][#6][#6X3]                            | 0.8858 |
| [#8][#6X3][#6X3][#6X3][#6H3]     | 0.0863 | [CX4H3][cX3H0]                              | 0.8944 |

---

Example 122 true smiles: Cc1ccccc1O formula: C7H8O  
 Index of correct structure: 0 of 746  
 True structure loss: 0.007141  
 True structure:

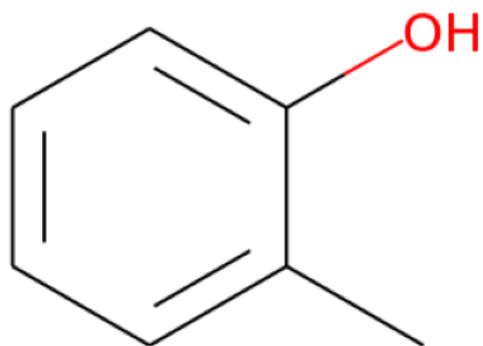

Experimental <sup>13</sup>C NMR (solvent: CDCl<sub>3</sub>)

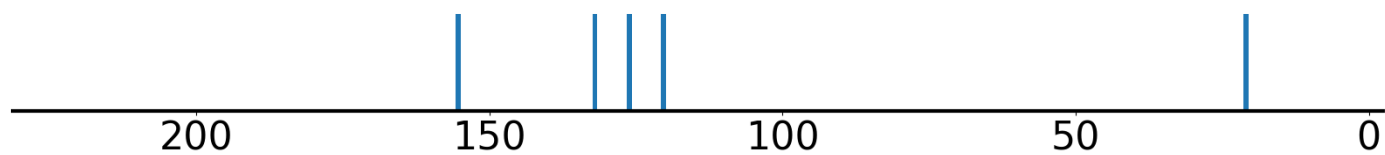

Experimental <sup>1</sup>H NMR (solvent: D<sub>2</sub>O)

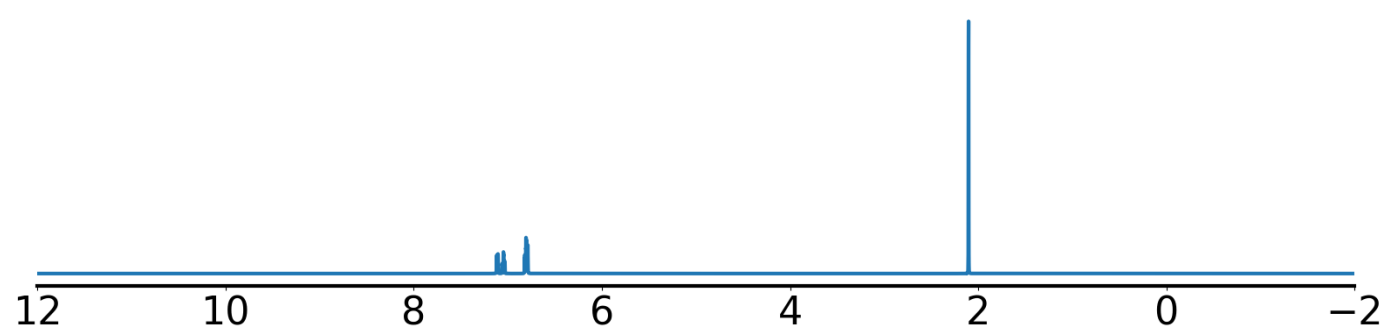

Top predicted structures (loss):

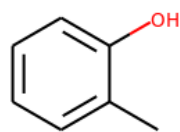

0.007141

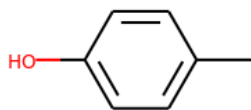

0.010702

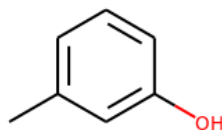

0.013357

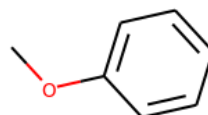

0.041378

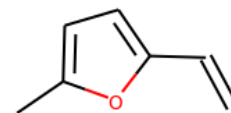

0.064152

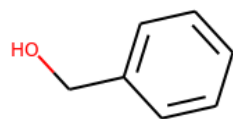

0.073154

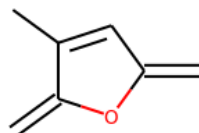

0.075647

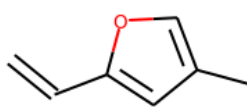

0.07753

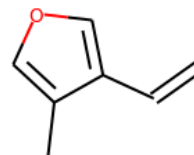

0.077702

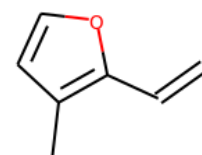

0.078329

Top predicted substructures  
 [#6X3][#6X3]

prob  
 0.9994

[#6H3][#6H0]

0.9938

|                                  |        |                                           |        |
|----------------------------------|--------|-------------------------------------------|--------|
| [#6H1]                           | 0.9985 | [#6H3][#6][#6]                            | 0.98   |
| [#6X3][#6X3][#6X3][#6X3]         | 0.9983 | [cH][cH]                                  | 0.9766 |
| [CX4H3]                          | 0.9977 | [#6X3H1][#6X3H0]                          | 0.9761 |
| [CX4H3][#6]                      | 0.9964 | [#6X3][#6][#6][#6H3]                      | 0.97   |
| best positives                   | prob   | best negatives                            | prob   |
| [#6X3][#6X3]                     | 0.9994 | [OX1H0]=[CX3H0]1[CX4H1][CX4H1][CX4H2]1    | 0.0    |
| [#6H1]                           | 0.9985 | [OX2H0]1[CX4H2][CX4H2][CX4H1][CX4H1]1     | 0.0    |
| [#6X3][#6X3][#6X3][#6X3]         | 0.9983 | [CX4H1]([NX3H2])([CX4H2])[CX3H1]          | 0.0    |
| [CX4H3]                          | 0.9977 | [CX4H0]([NX3H1])([CX4H3])([CX4H2])[CX4H1] | 0.0    |
| [CX4H3][#6]                      | 0.9964 | [#8][#6H1][#6H2][#6H1]=[#8]               | 0.0    |
| [#6H3][#6H0]                     | 0.9938 | [CX4H0]([NX3H1])([CX4H2])([CX4H2])[CX4H1] | 0.0    |
| [#6H3][#6][#6]                   | 0.98   | [CX4H1]([NX3H0])([CX4H2])[CX4H1]          | 0.0    |
| [cH][cH]                         | 0.9766 | [CX4H1]([NX3H0])([CX4H2])[CX4H0]          | 0.0    |
| [#6X3H1][#6X3H0]                 | 0.9761 | [CX4H1]([NX3H1])([CX4H3])[CX4H2]          | 0.0    |
| [#6X3][#6][#6][#6H3]             | 0.97   | [OX2H0][CX4H2][CX4H2][CX4H1][OX2H0]       | 0.0    |
| worst negatives                  | prob   | worst positives                           | prob   |
| [#6X3H1][#6X3H1][#6X3H0][#6X3H1] | 0.3628 | [cX3H0]([cX3H1])([cX3H0])[OX2H1]          | 0.3608 |
| [cX3H0][cX3H1][cX3H1][cX3H0]     | 0.3205 | [#8][#6H0][#6H1]                          | 0.643  |
| [CHX3]=[CHX3]                    | 0.1941 | [#8][#6][#6][#6X3]                        | 0.7155 |
| [cX3H0][cX3H1][cX3H0][OX2H1]     | 0.19   | [OX2H][cX3]:[c]                           | 0.7402 |
| [cX3H1]([cX3H0])[cX3H0]          | 0.1843 | [OX2H1]                                   | 0.7458 |
| [#8][#6X3][#6X3][#6X3][#6H3]     | 0.1509 | [cX3H0]([cX3H1])([cX3H0])[CX4H3]          | 0.7845 |
| [#6H3][#6]=[#6X3]                | 0.1331 | [cX3H1]([cX3H1])[cX3H1]                   | 0.7979 |
| [#6X3][#6]=[#6][#6H3]            | 0.1009 | [cH]cO                                    | 0.8557 |
| o[cH]                            | 0.092  | [#6H3][#6][#6X3]                          | 0.8741 |
| [CH3][#6][#8]                    | 0.0723 | [#6H1][#6H1]                              | 0.8827 |

---

Example 123 true smiles: Cc1ccc(O)c1 formula: C7H8O  
 Index of correct structure: 0 of 746  
 True structure loss: 0.00733  
 True structure:

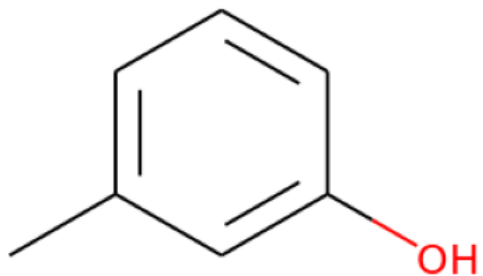

Experimental <sup>13</sup>C NMR (solvent: CDCl<sub>3</sub>)

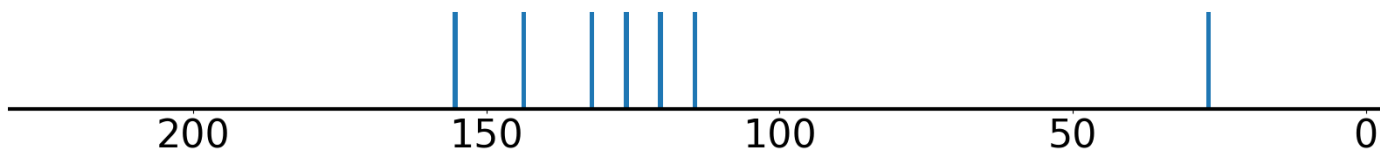

Experimental <sup>1</sup>H NMR (solvent: D<sub>2</sub>O)

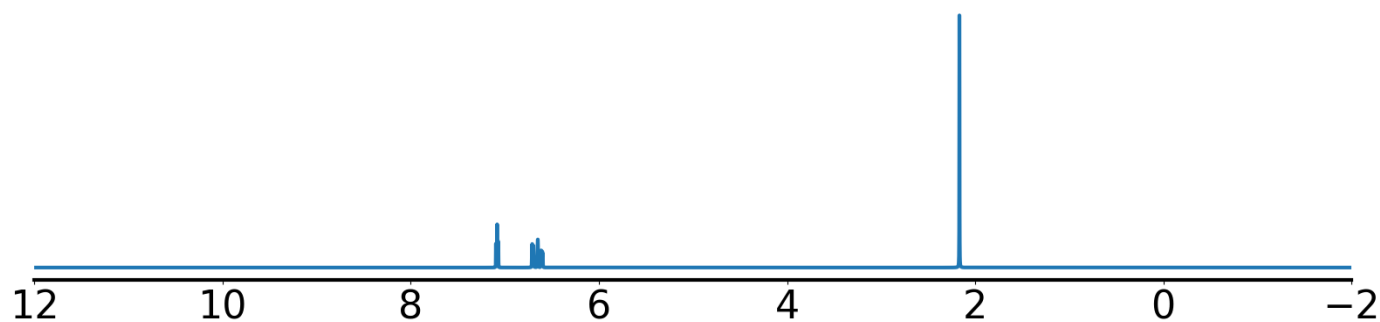

Top predicted structures (loss):

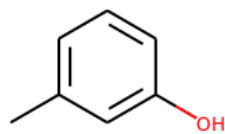

0.00733

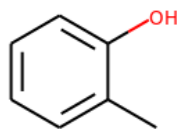

0.009841

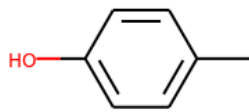

0.01076

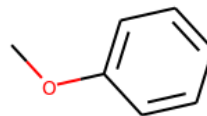

0.041811

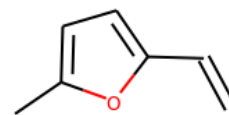

0.060376

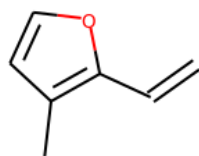

0.071828

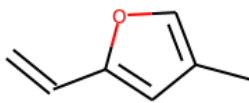

0.073556

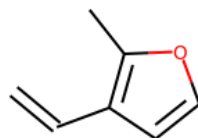

0.076027

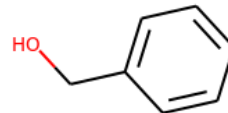

0.076688

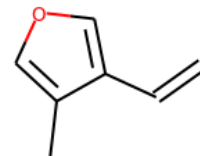

0.076963

Top predicted substructures  
 [#6X3][#6X3][#6X3][#6X3]

prob  
 0.9998

[#6X3H1][#6X3H0]

0.9959



|                                  |        |                                           |        |
|----------------------------------|--------|-------------------------------------------|--------|
| [#6X3][#6X3]                     | 0.9997 | [#6H3][#6][#6]                            | 0.9953 |
| [CX4H3]                          | 0.9993 | [cH][cH]                                  | 0.9884 |
| [#6H1]                           | 0.9991 | [CX4H3][#6]                               | 0.9831 |
| [#6H3][#6H0]                     | 0.9972 | [#6X3][#6][#6][#6H3]                      | 0.9772 |
| best positives                   | prob   | best negatives                            | prob   |
| [#6X3][#6X3][#6X3][#6X3]         | 0.9998 | [CX4H1]([NX3H2])([CX4H2])[CX3H1]          | 0.0    |
| [#6X3][#6X3]                     | 0.9997 | [OX2H0]1[CX4H2][CX4H2][CX4H1][CX4H1]1     | 0.0    |
| [CX4H3]                          | 0.9993 | [CX4H1]([NX3H0])([CX4H2])[CX4H0]          | 0.0    |
| [#6H1]                           | 0.9991 | [CX4H0]([NX3H1])([CX4H3])([CX4H2])[CX4H1] | 0.0    |
| [#6H3][#6H0]                     | 0.9972 | [CX4H1]([NX3H0])([CX4H1])[CX4H1]          | 0.0    |
| [#6X3H1][#6X3H0]                 | 0.9959 | [OX2H0][CX4H2][CX4H1]([CX4H1])[CX4H1]     | 0.0    |
| [#6H3][#6][#6]                   | 0.9953 | [OX1H0]=[CX3H0]1[CX4H1][CX4H1][CX4H2]1    | 0.0    |
| [cH][cH]                         | 0.9884 | [CX4H0]([NX3H1])([CX4H2])([CX4H2])[CX4H1] | 0.0    |
| [CX4H3][#6]                      | 0.9831 | [#8][#6H1][#6H2][#6H1]=[#8]               | 0.0    |
| [#6X3][#6][#6][#6H3]             | 0.9772 | [OX2H1][CX4H1][CX4H1]([CX4H2])[CX4H2]     | 0.0    |
| worst negatives                  | prob   | worst positives                           | prob   |
| [cX3H0]([cX3H1])([cX3H0])[CX4H3] | 0.3974 | [cX3H1]([cX3H0])[cX3H0]                   | 0.4304 |
| [cX3H0]([cX3H1])([cX3H0])[OX2H1] | 0.2473 | [cX3H0][cX3H1][cX3H0][OX2H1]              | 0.5777 |
| [cX3H0][cX3H1][cX3H1][cX3H0]     | 0.2423 | [#8][#6X3][#6X3][#6X3][#6H3]              | 0.59   |
| o[cH]                            | 0.1662 | [#6X3H1][#6X3H1][#6X3H0][#6X3H1]          | 0.6168 |
| [cX3H1]([oX2H0])[cX3H1]          | 0.1624 | [OX2H1]                                   | 0.6697 |
| [#8][#6H1][#6H1]                 | 0.1325 | [OX2H][cX3]:[c]                           | 0.7578 |
| [#8][#6H][#6X3][#6X3H]           | 0.0895 | [cX3H1]([cX3H1])[cX3H1]                   | 0.8513 |
| [CH3][#6][#8]                    | 0.0789 | [cH]cO                                    | 0.8614 |
| [CX3H](O)                        | 0.0753 | [#6]1[#6][#6][#6][#6]1                    | 0.8717 |
| [CHX3]=[CHX3]                    | 0.0711 | [CX4H3][cX3H0]                            | 0.8898 |

---

Example 124 true smiles: COCCC(=O)OC formula: C5H10O3  
 Index of correct structure: 0 of 739  
 True structure loss: 0.015744  
 True structure:

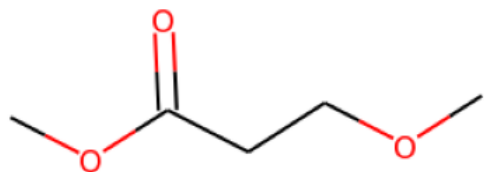

Experimental <sup>13</sup>C NMR (solvent: CDCl<sub>3</sub>)

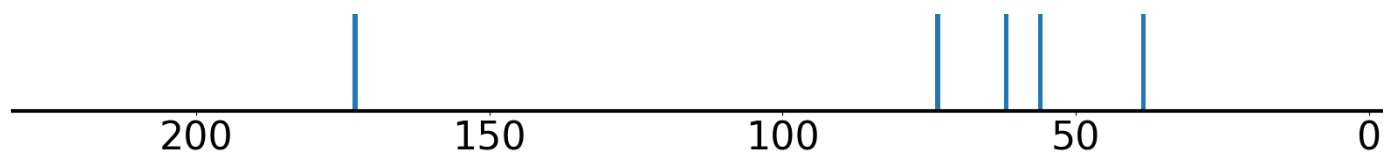

Experimental <sup>1</sup>H NMR (solvent: CDCl<sub>3</sub>)

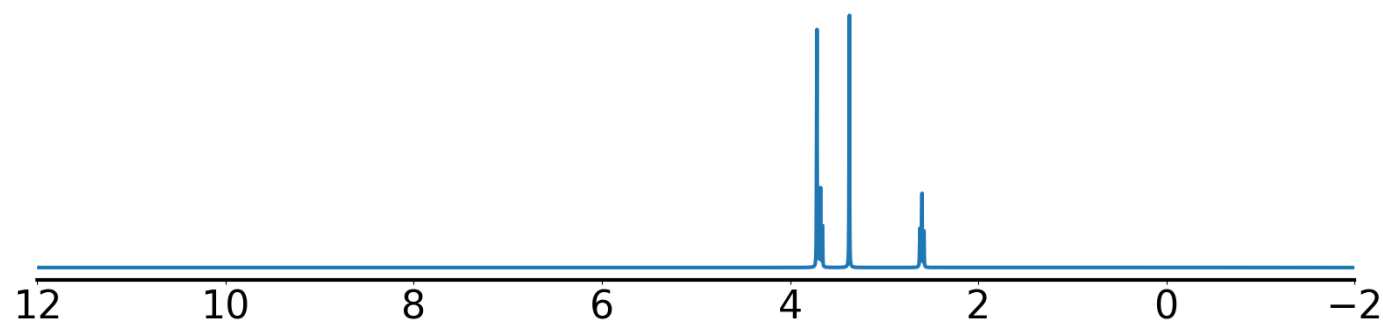

Top predicted structures (loss):

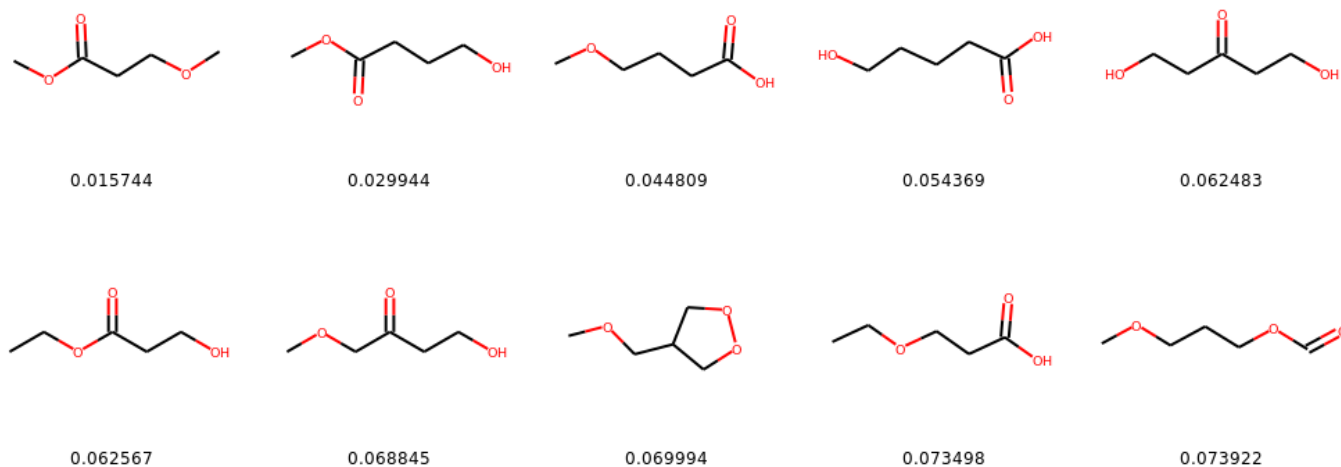

Top predicted substructures  
 [CX4H3]

prob  
 0.9947

[CX4H2]([#6])[#6]

0.9747

|                                |             |                                  |             |
|--------------------------------|-------------|----------------------------------|-------------|
| [CX4H3][OX2H0]                 | 0.9902      | OCC[CH2]                         | 0.968       |
| [#8]=[#6][#8]                  | 0.9882      | [CX4H2]([#6])[O]                 | 0.9516      |
| [CX3](=[OX1])C                 | 0.984       | [CX3](=[OX1])O                   | 0.9431      |
| [#8][#6][#6H2]                 | 0.9827      | [OX1H0]=[CX3H0]([#8])[CX4H2]     | 0.9132      |
| <b>best positives</b>          | <b>prob</b> | <b>best negatives</b>            | <b>prob</b> |
| [CX4H3]                        | 0.9947      | [#6X2][#6H1][#6X2]               | 0.0         |
| [CX4H3][OX2H0]                 | 0.9902      | [CX2H0](#[CX2H0])[CX2H0]         | 0.0         |
| [#8]=[#6][#8]                  | 0.9882      | CCC#CC#C                         | 0.0         |
| [CX3](=[OX1])C                 | 0.984       | [CX2H0](#[CX2H1])[CX3H0]         | 0.0         |
| [#8][#6][#6H2]                 | 0.9827      | CC=CC#CC                         | 0.0         |
| [CX4H2]([#6])[#6]              | 0.9747      | CC#CCC#C                         | 0.0         |
| OCC[CH2]                       | 0.968       | [CX4H1]([CX4H1])([CX4H1])[CX2H0] | 0.0         |
| [CX4H2]([#6])[O]               | 0.9516      | [#7][#6][#6][#7]                 | 0.0         |
| [CX3](=[OX1])O                 | 0.9431      | [CX3H1](=[CX3H2])[CX2H0]         | 0.0         |
| [OX1H0]=[CX3H0]([#8])[CX4H2]   | 0.9132      | CCC#CCC                          | 0.0         |
| <b>worst negatives</b>         | <b>prob</b> | <b>worst positives</b>           | <b>prob</b> |
| [OX2H1]                        | 0.6442      | [CX4H2]([OX2H0])[CX4H2]          | 0.4155      |
| [#6H1]                         | 0.5462      | O=C[CH2][CH2]O                   | 0.4215      |
| [CX4H2]([CX4H1])[CX3H0]        | 0.4867      | [CX4H2]CC=O                      | 0.4565      |
| O[CX4H][CX4H2]                 | 0.4474      | O=[CX3H0][CX4H2][CX4H2]          | 0.5104      |
| [CX4H2]([OX2H1])[CX4H2]        | 0.4127      | [CX4H2][CX4H2]                   | 0.636       |
| [#6H1][#6H2]                   | 0.3868      | [CH2X4](O)[CX4H2]                | 0.6647      |
| O=[CX3H0][CX4H2][CX4H1]        | 0.3527      | [#8][#6][#6][#6X3]               | 0.7787      |
| [#8][#6][#6][#6][#6][#8]       | 0.3374      | [CX4H2][CX3]=O                   | 0.7963      |
| [#6H1]([#6H2])[#6H2]           | 0.3015      | [OX2H0][CX3H0][CX4H2]            | 0.8028      |
| [#8X2H0][#6X3H0][CX4H2][CX4H1] | 0.2812      | [CX4H3][OX2H0][CX4H2]            | 0.8143      |

---

Example 125 true smiles: CCC(C)(O)C(=O)O formula: C5H10O3  
 Index of correct structure: 0 of 739  
 True structure loss: 0.009601  
 True structure:

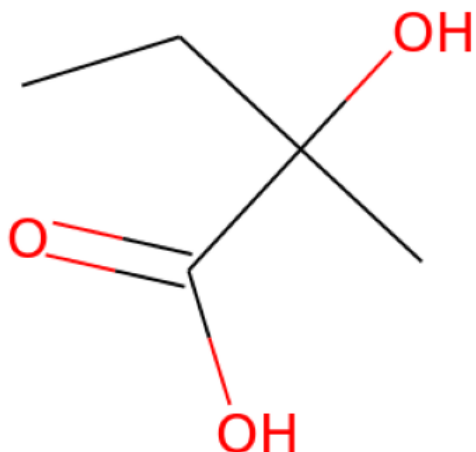

Experimental <sup>13</sup>C NMR (solvent: CDCl<sub>3</sub>)

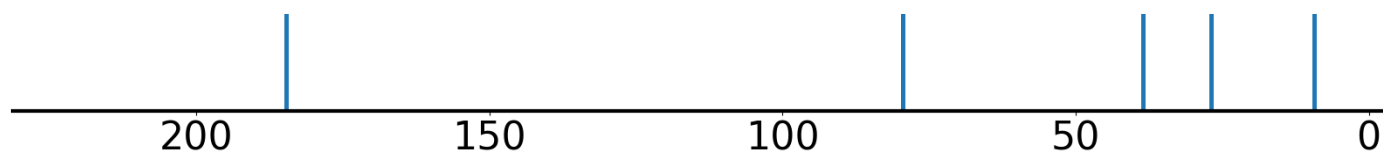

Experimental <sup>1</sup>H NMR (solvent: CDCl<sub>3</sub>)

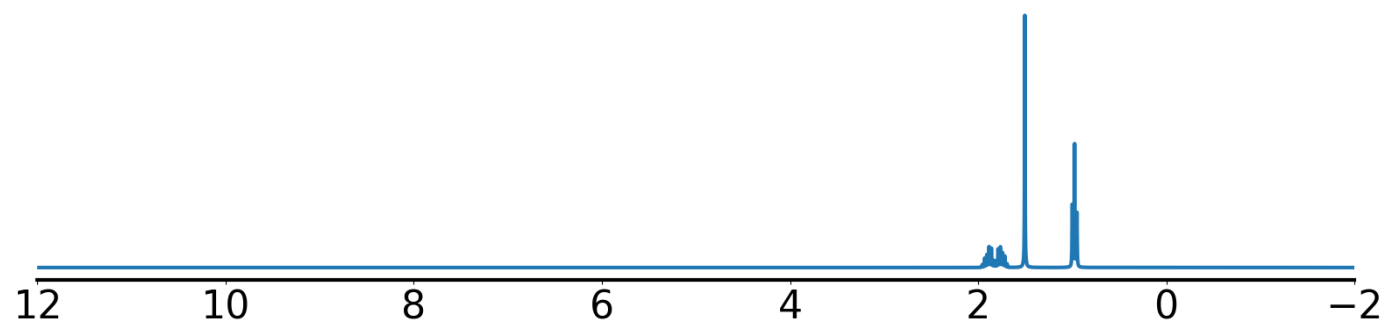

Top predicted structures (loss):

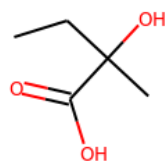

0.009601

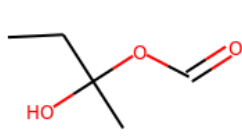

0.046423

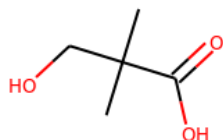

0.061202

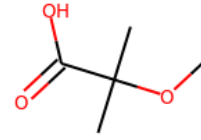

0.06516

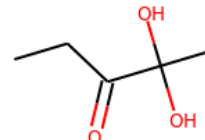

0.065722

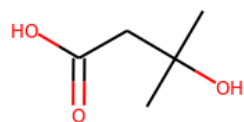

0.0741

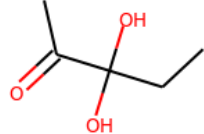

0.07679

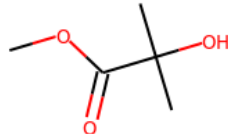

0.07681

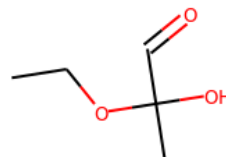

0.078138

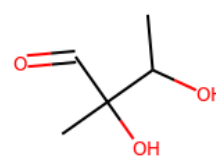

0.078969

Top predicted substructures  
 [#6H3][#6][#6]

prob  
 1.0

[#8]=[#6][#8]

0.9927

|                |        |                      |        |
|----------------|--------|----------------------|--------|
| [CX4H3]        | 0.9999 | [#6H3][#6H0]         | 0.9914 |
| [CX4H3][#6]    | 0.9998 | [CX4H2]( [#6] ) [#6] | 0.9913 |
| [OX2H1]        | 0.9993 | [CH3]CC[OH]          | 0.9907 |
| [CX3](=[OX1])C | 0.9988 | [CX4H3][CX4H2]       | 0.9868 |

| best positives       | prob   | best negatives                    | prob |
|----------------------|--------|-----------------------------------|------|
| [#6H3][#6][#6]       | 1.0    | CC=CC#CC                          | 0.0  |
| [CX4H3]              | 0.9999 | C=CC=CC#C                         | 0.0  |
| [CX4H3][#6]          | 0.9998 | CCC=CC#C                          | 0.0  |
| [OX2H1]              | 0.9993 | CC#CCC#C                          | 0.0  |
| [CX3](=[OX1])C       | 0.9988 | [CX2H1]#[CX2H0][CX3H1]=[CX3H0]    | 0.0  |
| [#8]=[#6][#8]        | 0.9927 | CCC#CC#C                          | 0.0  |
| [#6H3][#6H0]         | 0.9914 | [CX3H0](=[CX3H1])([OX2H0])[CX2H0] | 0.0  |
| [CX4H2]( [#6] ) [#6] | 0.9913 | [#6X2][#6H1][#6X2]                | 0.0  |
| [CH3]CC[OH]          | 0.9907 | [#7][#6]=[#6][#6]#[#7]            | 0.0  |
| [CX4H3][CX4H2]       | 0.9868 | [CX2H0](#[CX2H1])[CX3H1]          | 0.0  |

| worst negatives                   | prob   | worst positives              | prob   |
|-----------------------------------|--------|------------------------------|--------|
| [#8][#6H0][#6H1]                  | 0.6323 | [#8][#6][#6][#8]             | 0.5714 |
| [CX3H0](=[OX1H0])([OX2H1])[CX4H1] | 0.6148 | [CX4H2]CC=O                  | 0.6551 |
| [#6H1]                            | 0.3919 | [#6H3][#6][#6][#6H3]         | 0.711  |
| [#6H1][#6H2]                      | 0.3251 | [CX4H2]( [CX4H3] ) [CX4H0]   | 0.722  |
| [OH][CX4H]                        | 0.3065 | [#6H3][#6][#6X3]             | 0.76   |
| [#8][#6][#6][#6X3]                | 0.3041 | [#8][#6][#6]=[#8]            | 0.8058 |
| [#8]=[#6H0][#6H1]                 | 0.2186 | [#6X3][#6][#6][#6H3]         | 0.8131 |
| O=[#6][#6H][#6H0]                 | 0.1529 | [OX2H1][CX4H0][CX4H2][CX4H3] | 0.8562 |
| [#8H][#6X4H1][#6X3H0]             | 0.1368 | [CH3][#6][#8]                | 0.8638 |
| O[CX4H][CX4H2]                    | 0.1345 | [#8][#6][#6H2]               | 0.8913 |

-----

Example 126 true smiles: O=C(O)CCCCO formula: C5H10O3  
 Index of correct structure: 0 of 739  
 True structure loss: 0.007485  
 True structure:

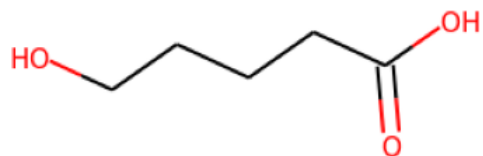

Experimental <sup>13</sup>C NMR (solvent: CDCl<sub>3</sub>)

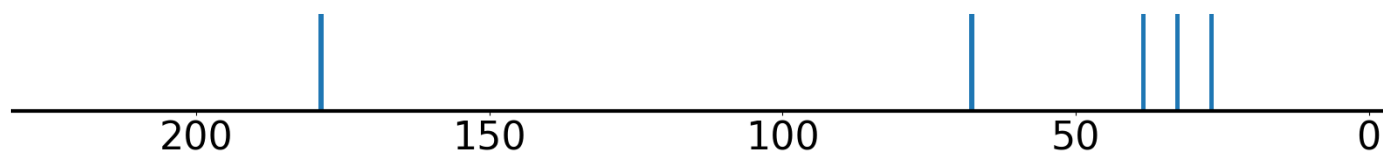

Experimental <sup>1</sup>H NMR (solvent: D<sub>2</sub>O)

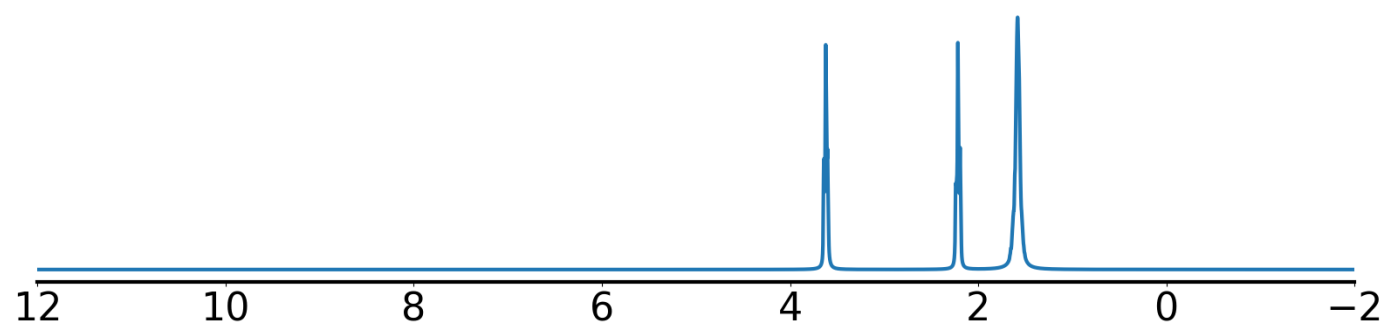

Top predicted structures (loss):

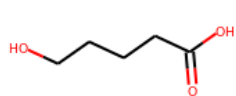

0.007485

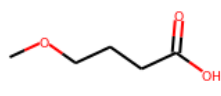

0.046104

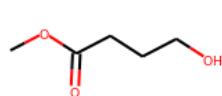

0.048947

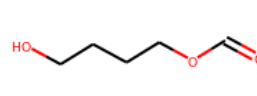

0.07109

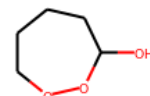

0.076818

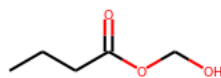

0.08025

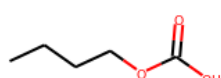

0.080297

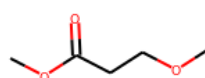

0.082838

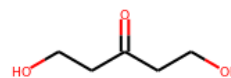

0.083664

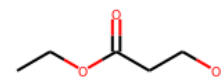

0.083805

Top predicted substructures  
 [CX4H2][[#6]][#6]

prob  
 1.0

[CX3](=[OX1])O

0.9973

|                                   |        |                                   |        |
|-----------------------------------|--------|-----------------------------------|--------|
| [#8]=[#6][#8]                     | 0.9993 | [CX4H2][CX4H2]                    | 0.9973 |
| OCC[CH2]                          | 0.9989 | [#8][#6][#6H2]                    | 0.997  |
| [OX2H1]                           | 0.9989 | [CX4H2]([CX4H2])[CX4H2]           | 0.9894 |
| [CX3](=[OX1])C                    | 0.9976 | O=[CX3H0][CX4H2][CX4H2]           | 0.9851 |
| best positives                    | prob   | best negatives                    | prob   |
| [CX4H2]([#6])[#6]                 | 1.0    | [CX3H0](=[CX3H1])([OX2H0])[CX2H0] | 0.0    |
| [#8]=[#6][#8]                     | 0.9993 | [CX2H0](#[CX2H1])[CX3H0]          | 0.0    |
| OCC[CH2]                          | 0.9989 | CCC#CC#C                          | 0.0    |
| [OX2H1]                           | 0.9989 | C=CC=CC#C                         | 0.0    |
| [CX3](=[OX1])C                    | 0.9976 | [CX2H0](#[CX2H1])[CX4H0]          | 0.0    |
| [CX3](=[OX1])O                    | 0.9973 | [CX2H1]#[CX2H0][CX3H1]=[CX3H0]    | 0.0    |
| [CX4H2][CX4H2]                    | 0.9973 | CC=CC#CC                          | 0.0    |
| [#8][#6][#6H2]                    | 0.997  | CCC=CC#C                          | 0.0    |
| [CX4H2]([CX4H2])[CX4H2]           | 0.9894 | CC#CCC#C                          | 0.0    |
| O=[CX3H0][CX4H2][CX4H2]           | 0.9851 | [CX2H0](#[CX2H0])[CX2H0]          | 0.0    |
| worst negatives                   | prob   | worst positives                   | prob   |
| [CX4H2]([CX4H2])[CX4H1]           | 0.8182 | [CX4H2]([OX2H1])[CX4H2]           | 0.7688 |
| [#6H1]                            | 0.5007 | [CH2X4](O)[CX4H2]                 | 0.8153 |
| [#6H1][#6H2]                      | 0.4171 | [CX3H0](=[OX1H0])([OX2H1])[CX4H2] | 0.8454 |
| [CX3H0](=[OX1H0])([OX2H1])[CX4H1] | 0.3302 | [CX4H2]CC=O                       | 0.8848 |
| CCCCC                             | 0.3113 | [CX4H2][CX3]=O                    | 0.8888 |
| [#8][#6][#6][#6][#6][#8]          | 0.2269 | [CH2X4](O)[CX4H2][CX4H2]          | 0.9355 |
| [#8H][#6H2][#6H1]                 | 0.1407 | [CX4H2]([CX4H2])[CX3H0]           | 0.9543 |
| [OX2H0][CX3H0][CX4H2]             | 0.1292 | [CX4H2]([#6])[O]                  | 0.9638 |
| [#8][#6][#6][#6][#6]=[#8]         | 0.126  | [CX4H2][CX4H2][CX4H2][CX4H2]      | 0.9759 |
| [#8]=[#6H0][#6H1]                 | 0.1064 | [OX1H0]=[CX3H0]([#8])[CX4H2]      | 0.9799 |

---

Example 127 true smiles: CC(C)C(O)C(=O)O formula: C5H10O3  
 Index of correct structure: 0 of 739  
 True structure loss: 0.011302  
 True structure:

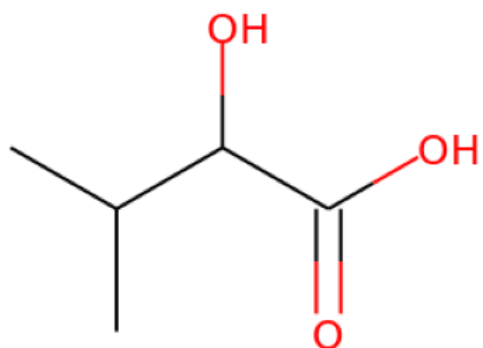

Experimental <sup>13</sup>C NMR (solvent: DMSO)

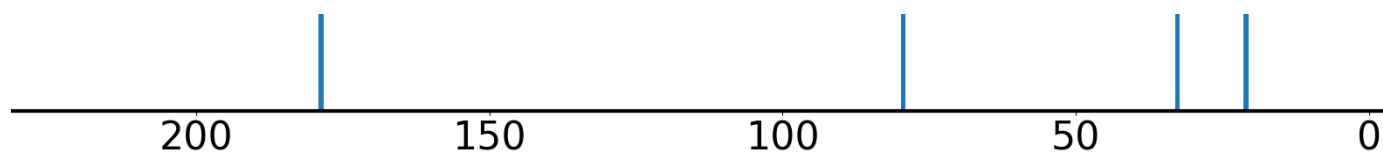

Experimental <sup>1</sup>H NMR (solvent: D2O)

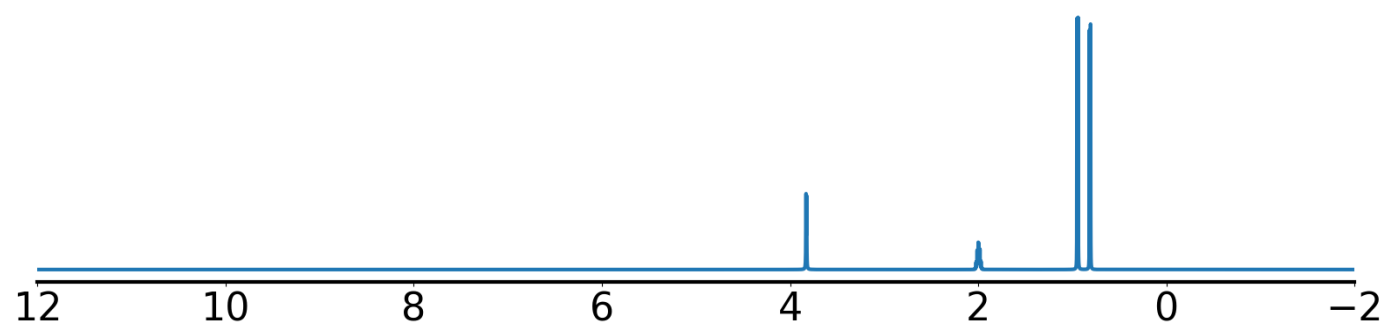

Top predicted structures (loss):

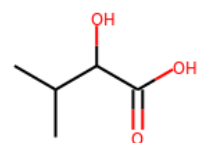

0.011302

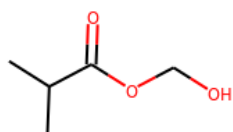

0.050509

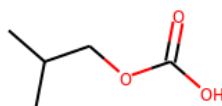

0.061464

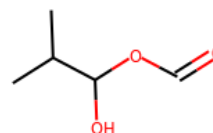

0.062112

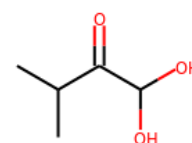

0.06217

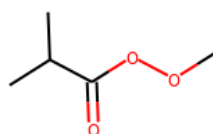

0.063761

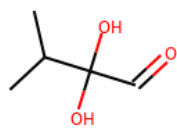

0.070679

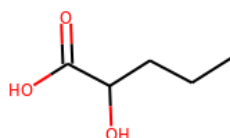

0.072699

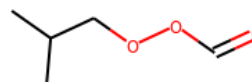

0.077151

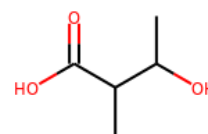

0.079581

Top predicted substructures  
 [#6H3][#6][#6]

prob  
 0.9999

[CX3](=[OX1])C

0.996



|                                  |        |                                   |        |
|----------------------------------|--------|-----------------------------------|--------|
| [CX4H3]                          | 0.9998 | [CX3](=[OX1])O                    | 0.9949 |
| [CX4H3][#6]                      | 0.9997 | [OX2H1]                           | 0.9937 |
| [#8]=[#6][#8]                    | 0.9985 | [CHX4]([CH3X4])[CH3X4]            | 0.9933 |
| [#6H1]                           | 0.9981 | [CX3](=O)[OX2H1]                  | 0.9722 |
| best positives                   | prob   | best negatives                    | prob   |
| [#6H3][#6][#6]                   | 0.9999 | [CX2H1]#[CX2H0][CX3H1]=[CX3H0]    | 0.0    |
| [CX4H3]                          | 0.9998 | CC#CCC#C                          | 0.0    |
| [CX4H3][#6]                      | 0.9997 | CCC#CC#C                          | 0.0    |
| [#8]=[#6][#8]                    | 0.9985 | [CX2H0](#[CX2H0])[CX2H0]          | 0.0    |
| [#6H1]                           | 0.9981 | [CX3H0](=[CX3H1])([CX4H2])[CX2H0] | 0.0    |
| [CX3](=[OX1])C                   | 0.996  | CCC=CC#C                          | 0.0    |
| [CX3](=[OX1])O                   | 0.9949 | CC=CC#CC                          | 0.0    |
| [OX2H1]                          | 0.9937 | [#6X2][#6H1][#6X2]                | 0.0    |
| [CHX4]([CH3X4])[CH3X4]           | 0.9933 | CCC#CC=C                          | 0.0    |
| [CX3](=O)[OX2H1]                 | 0.9722 | [CX3H0](=[CX3H1])([OX2H0])[CX2H0] | 0.0    |
| worst negatives                  | prob   | worst positives                   | prob   |
| [#6H1][#6H2]                     | 0.5933 | [#8][#6H1][#6H1]                  | 0.3302 |
| [CHX4]([CH3X4])[CH2X4]           | 0.2751 | [#6H1][#6H1]                      | 0.4853 |
| [#8][#6][#6H2]                   | 0.2661 | [OH][CX4H]                        | 0.5715 |
| [CX4H1]([CX4H3])([CX4H3])[CX4H2] | 0.254  | [#8]=[#6][#6H1][#6H1]             | 0.6868 |
| OCC[CH2]                         | 0.2407 | [CX4H]O                           | 0.6907 |
| [CX4H1]([OX2H1])([CX4H2])[CX3H0] | 0.2365 | [#8]=[#6H0][#6H1]                 | 0.7058 |
| [CX4H2]CC=O                      | 0.2329 | [#8][#6H0][#6H1]                  | 0.7568 |
| [#8][#6][#6][#6X3]               | 0.197  | [CX3H0](=[OX1H0])([OX2H1])[CX4H1] | 0.7572 |
| [CX4H2][CX3]=O                   | 0.1727 | [CH3]CC[OH]                       | 0.7739 |
| [CH3][#6][#8]                    | 0.1348 | O=[CX3][CX4H]                     | 0.776  |

---

Example 128 true smiles: OCC(O)C(O)C(O)CO formula: C5H12O5  
 Index of correct structure: 0 of 734  
 True structure loss: 0.010997  
 True structure:

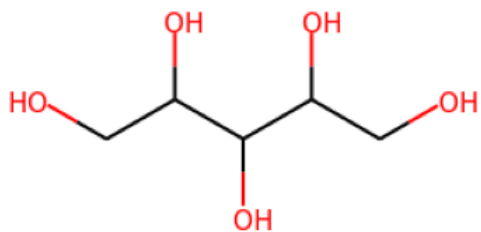

Experimental 13C NMR (solvent: D2O)

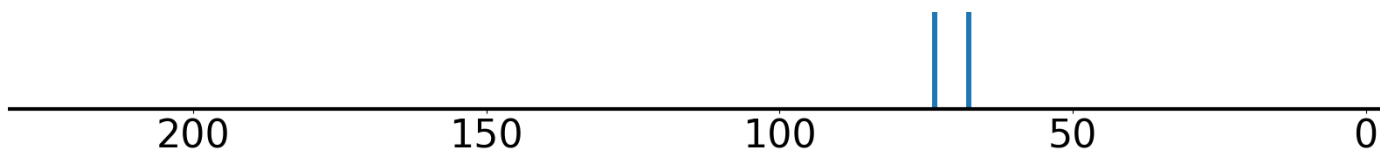

Experimental 1H NMR (solvent: D2O)

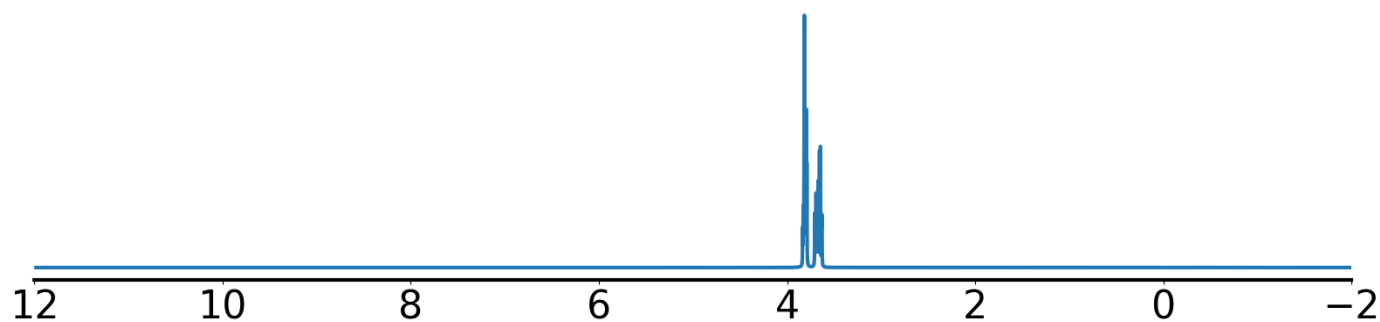

Top predicted structures (loss):

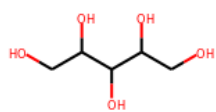

0.010997

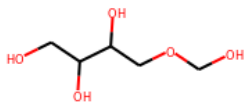

0.013642

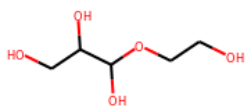

0.019935

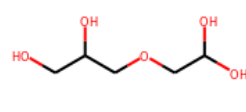

0.022565

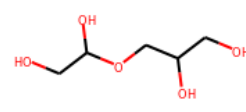

0.022975

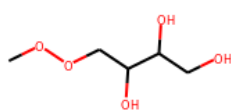

0.022978

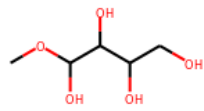

0.023036

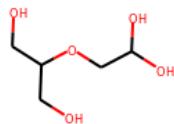

0.024061

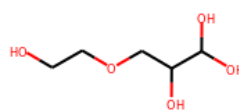

0.024443

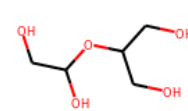

0.025249

Top predicted substructures  
 [OX2H1]

prob  
 0.9997

[CX4H2]([#6])[O]

0.9862

|                                  |        |                                   |        |
|----------------------------------|--------|-----------------------------------|--------|
| [#8][#6][#6][#8]                 | 0.9966 | [CX4H]O                           | 0.9561 |
| [#8][#6][#6H2][#8]               | 0.9958 | OCC[CH2]                          | 0.9414 |
| [CX4H](O)CO                      | 0.9954 | [#6H1]                            | 0.9312 |
| [#8][#6][#6H2]                   | 0.9884 | O[CX4H][CX4H2]                    | 0.9255 |
| best positives                   | prob   | best negatives                    | prob   |
| [OX2H1]                          | 0.9997 | [CX2H1]#[CX2H0][CX3H1]=[CX3H0]    | 0.0    |
| [#8][#6][#6][#8]                 | 0.9966 | CC#CCC=C                          | 0.0    |
| [#8][#6][#6H2][#8]               | 0.9958 | [#7][#6]=[#6][#6][#6]=[#7]        | 0.0    |
| [CX4H](O)CO                      | 0.9954 | CC=CC#CC                          | 0.0    |
| [#8][#6][#6H2]                   | 0.9884 | [CX3H0][CX4H2][CX3H1]=[CX3H0]     | 0.0    |
| [CX4H2]([#6])[O]                 | 0.9862 | CC=CCC#C                          | 0.0    |
| [CX4H]O                          | 0.9561 | [#7][#6][#6][#7]                  | 0.0    |
| OCC[CH2]                         | 0.9414 | C=CCCC#C                          | 0.0    |
| [#6H1]                           | 0.9312 | [OX1H0]=[CX3H0][CX2H0]#[CX2H1]    | 0.0    |
| O[CX4H][CX4H2]                   | 0.9255 | [CX3H0](=[CX3H2])([CX4H3])[CX4H2] | 0.0    |
| worst negatives                  | prob   | worst positives                   | prob   |
| [CX4H2][CX4H2]                   | 0.4875 | [#6X4H1][#6X4H1][#6X4H1]          | 0.2404 |
| [#6H2][#6H1][#6H1][#6H2]         | 0.3715 | [CX4H](O)([CH])[CH]               | 0.2744 |
| [CH2X4](O)[CX4H2]                | 0.3071 | [CX4H1]([OX2H1])([CX4H1])[CX4H1]  | 0.4353 |
| [CX4H1]([OX2H1])([CX4H2])[CX4H2] | 0.2426 | [#8][#6][#6][#6][#6][#8]          | 0.4735 |
| [CX4H2]([OX2H0])[CX4H2]          | 0.2124 | [#8][#6H1][#6H1]                  | 0.4889 |
| [#6H1]([#6H2])[#6H2]             | 0.159  | [CX4H1]([OX2H1])([CX4H2])[CX4H1]  | 0.6617 |
| [CX4H2]([OX2H0])[CX4H1]          | 0.1416 | [#6H1][#6H1]                      | 0.7223 |
| [OX2H0][CX4H2][CX4H1][CX4H2]     | 0.0988 | [CX4H2]([OX2H1])[CX4H1]           | 0.7763 |
| O[CX4H2][CX4H2]O                 | 0.0701 | [OX2H1][CX4H1][CX4H1][OX2H1]      | 0.7805 |
| [CX4H2][OX2H0][CX4H2]            | 0.07   | O[CX4H]([CX4H2])[CX4H1]           | 0.7868 |

---

Example 129 true smiles: OCC(O)C(O)C(O)CO formula: C5H12O5  
 Index of correct structure: 0 of 734  
 True structure loss: 0.012278  
 True structure:



Experimental 13C NMR (solvent: D2O)

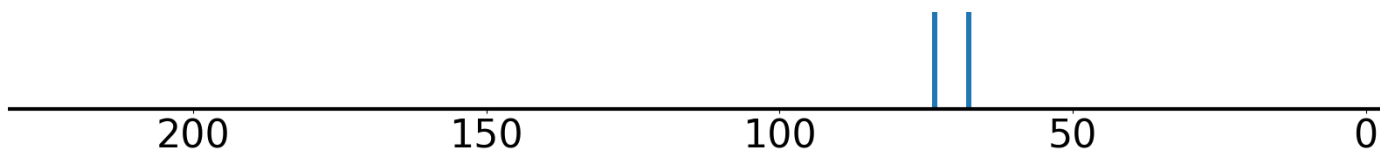

Experimental 1H NMR (solvent: D2O)

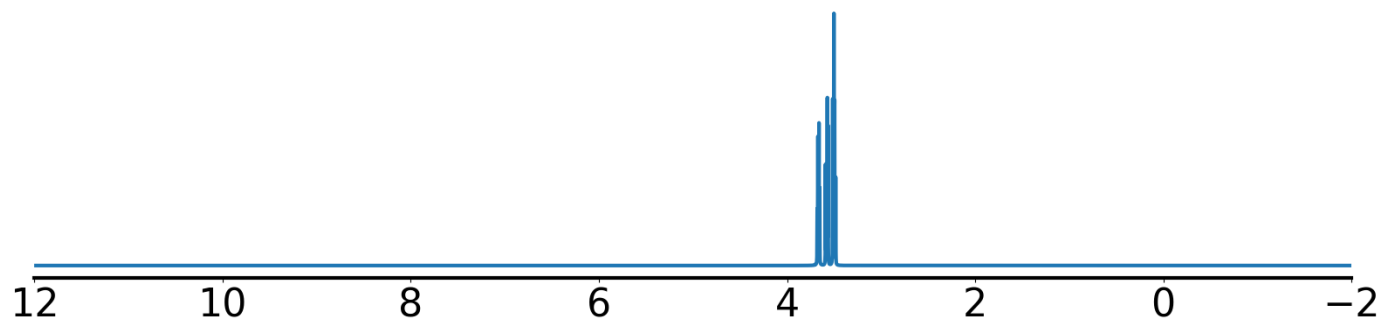

Top predicted structures (loss):

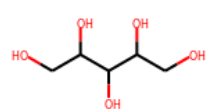

0.012278

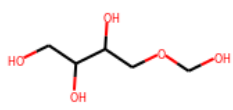

0.015361

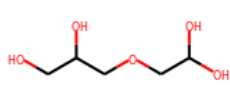

0.022517

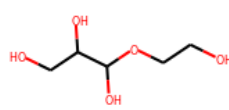

0.022808

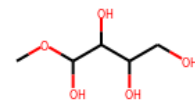

0.023509

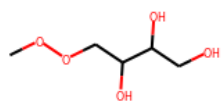

0.024467

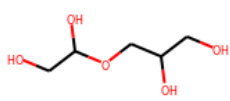

0.024473

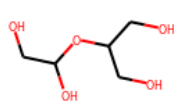

0.025082

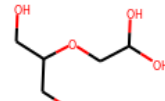

0.025642

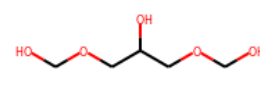

0.026691

Top predicted substructures  
 [OX2H1]

prob  
 0.9997

[#8][#6][#6H2]

0.9788

|                                  |        |                                   |        |
|----------------------------------|--------|-----------------------------------|--------|
| [#8][#6][#6][#8]                 | 0.9952 | [CX4H2](O)[CHX4]                  | 0.8962 |
| [#8][#6][#6H2][#8]               | 0.9941 | [#8H][#6H2][#6H1]                 | 0.894  |
| [CX4H2]([#6])[O]                 | 0.9927 | [CX4H2]([OX2H1])[CX4H1]           | 0.8655 |
| [CX4H](O)CO                      | 0.9808 | OCC[CH2]                          | 0.8429 |
| best positives                   | prob   | best negatives                    | prob   |
| [OX2H1]                          | 0.9997 | [CX2H1]#[CX2H0][CX3H1]=[CX3H0]    | 0.0    |
| [#8][#6][#6][#8]                 | 0.9952 | CC=CCC#C                          | 0.0    |
| [#8][#6][#6H2][#8]               | 0.9941 | CC=CC#C                           | 0.0    |
| [CX4H2]([#6])[O]                 | 0.9927 | [#7][#6]=[#6][#6]=[#7]            | 0.0    |
| [CX4H](O)CO                      | 0.9808 | CCC#CC=C                          | 0.0    |
| [#8][#6][#6H2]                   | 0.9788 | [CX3H0][CX4H2][CX3H1]=[CX3H0]     | 0.0    |
| [CX4H2](O)[CHX4]                 | 0.8962 | [OX1H0]=[CX3H0][CX2H0]#[CX2H1]    | 0.0    |
| [#8H][#6H2][#6H1]                | 0.894  | C=CCC#C                           | 0.0    |
| [CX4H2]([OX2H1])[CX4H1]          | 0.8655 | [CX3H0](=[CX3H1])([CX4H1])[CX2H0] | 0.0    |
| OCC[CH2]                         | 0.8429 | CC#CCC=C                          | 0.0    |
| worst negatives                  | prob   | worst positives                   | prob   |
| [CX4H2][CX4H2]                   | 0.3729 | [#6X4H1][#6X4H1][#6X4H1]          | 0.1873 |
| [#6H2][#6H1][#6H1][#6H2]         | 0.3319 | [CX4H](O)([CH])[CH]               | 0.3487 |
| [CH2X4](O)[CX4H2]                | 0.2954 | [#8][#6H1][#6H1]                  | 0.4164 |
| [#6H1]([#6H2])[#6H2]             | 0.2299 | [CX4H1]([OX2H1])([CX4H1])[CX4H1]  | 0.4488 |
| [CX4H2]([OX2H0])[CX4H2]          | 0.2114 | [#8][#6][#6][#6][#6][#8]          | 0.5216 |
| [CX4H1]([OX2H1])([CX4H2])[CX4H2] | 0.1435 | [CX4H1]([OX2H1])([CX4H2])[CX4H1]  | 0.5363 |
| [CX4H2][OX2H0][CX4H2]            | 0.1157 | [#6H1][#6H1]                      | 0.5527 |
| [#8][#6H2][#6H0][#6H2][#8]       | 0.103  | [#6X4H2][#6H1][#8H]               | 0.6557 |
| O[CX4H2][CX4H2]O                 | 0.0868 | O[CX4H]([CX4H2])[CX4H1]           | 0.6767 |
| [CX4H2]([OX2H0])[CX4H1]          | 0.0748 | [OX2H1][CX4H1][CX4H1][OX2H1]      | 0.7484 |

---

Example 130 true smiles: O=C(O)CC(=O)C(=O)O formula: C4H4O5  
 Index of correct structure: 0 of 729  
 True structure loss: 0.025576  
 True structure:

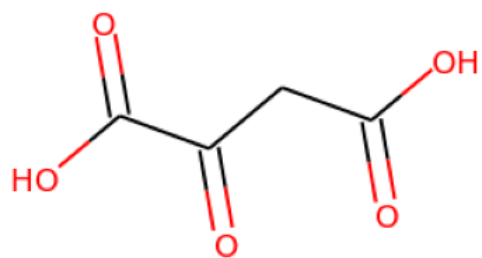

Experimental <sup>13</sup>C NMR (solvent: D2O)

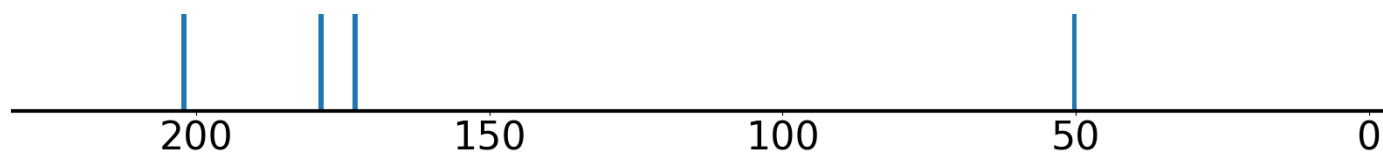

Experimental <sup>1</sup>H NMR (solvent: D2O)

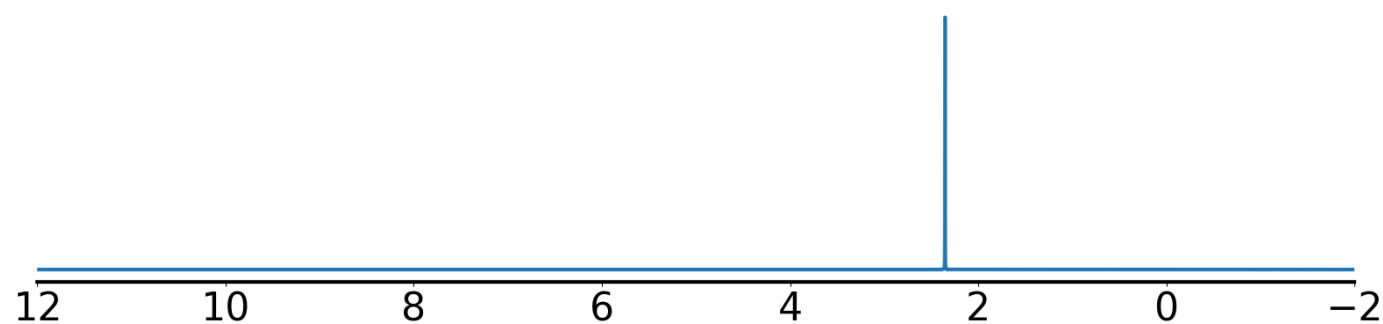

Top predicted structures (loss):

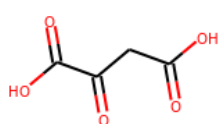

0.025576

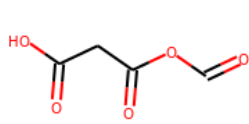

0.04397

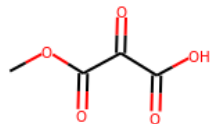

0.05027

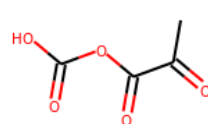

0.052274

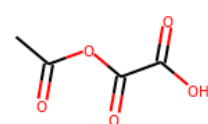

0.062491

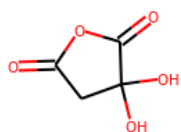

0.065158

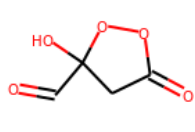

0.065795

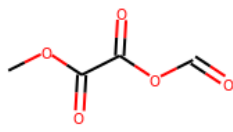

0.069105

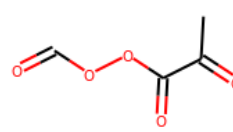

0.070087

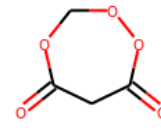

0.070771

Top predicted substructures  
[CX3](=[OX1])C

prob  
 0.9999

[OX2H1]

0.8852

|                                   |        |                                       |        |
|-----------------------------------|--------|---------------------------------------|--------|
| [CX3](=[OX1])O                    | 0.999  | [#6X3][#6X3]                          | 0.8842 |
| [#8]=[#6][#8]                     | 0.9974 | [#8]=[#6][#6]=[#8]                    | 0.8829 |
| [CX4H3]                           | 0.9562 | O=CC=O                                | 0.8771 |
| [#8X1]=[#6X3][#6H2][#6H0]         | 0.9017 | [CX4H2][CX3]=O                        | 0.8736 |
| best positives                    | prob   | best negatives                        | prob   |
| [CX3](=[OX1])C                    | 0.9999 | [CX2H0](#[CX2H1])[CX4H0]              | 0.0    |
| [CX3](=[OX1])O                    | 0.999  | CC#CCC=C                              | 0.0    |
| [#8]=[#6][#8]                     | 0.9974 | [OX2H0]1[CX4H2][CX4H2][CX4H1][CX4H1]1 | 0.0    |
| [#8X1]=[#6X3][#6H2][#6H0]         | 0.9017 | CC#CCC#C                              | 0.0    |
| [OX2H1]                           | 0.8852 | [CX2H1]#[CX2H0][CX3H1]=[CX3H0]        | 0.0    |
| [#6X3][#6X3]                      | 0.8842 | [CX3H1](=[CX3H2])[CX2H0]              | 0.0    |
| [#8]=[#6][#6]=[#8]                | 0.8829 | CCC#CC#C                              | 0.0    |
| O=CC=O                            | 0.8771 | CC=CC#CC                              | 0.0    |
| [CX4H2][CX3]=O                    | 0.8736 | [CX4H1]([CX4H1])([CX4H1])[CX4H0]      | 0.0    |
| O=[#6][#6][#6X3]                  | 0.8399 | [#6X2][#6H1][#6X2]                    | 0.0    |
| worst negatives                   | prob   | worst positives                       | prob   |
| [CX4H3]                           | 0.9562 | [#8][#6][#6][#6][#6][#8]              | 0.0311 |
| [#6H3][#6H0]                      | 0.7074 | OCC[CH2]                              | 0.2489 |
| [#6H3][#6][#6]                    | 0.5015 | [CX4H2]CC=O                           | 0.3009 |
| [#6X3][#6][#6][#6H3]              | 0.4794 | [#8][#6][#6][#6][#6]=[#8]             | 0.3196 |
| [CX4H3][#6]                       | 0.3592 | [#8][#6][#6]=[#8]                     | 0.3571 |
| [OX2H0][CX3H0][CX4H2]             | 0.3371 | [CX3H0](=[OX1H0])([OX2H1])[CX3H0]     | 0.5088 |
| [CX3H0](=[OX1H0])([OX2H1])[CX4H1] | 0.321  | [CX3H0](=[OX1H0])([OX2H1])[CX4H2]     | 0.575  |
| [CX4H3][CX3]                      | 0.3208 | [CX3H0](=[OX1H0])([CX4H2])[CX3H0]     | 0.5817 |
| [#8][#6H0][#6H1]                  | 0.223  | [CX4H2]([#6])[#6]                     | 0.7039 |
| [OX1H0]=[CX3H0][CX4H3]            | 0.1903 | [OX1H0]=[CX3H0]([#6])[CX4H2]          | 0.7233 |

---

Example 131 true smiles: C1CNCCNC1 formula: C5H12N2  
 Index of correct structure: 0 of 619  
 True structure loss: 0.012311  
 True structure:

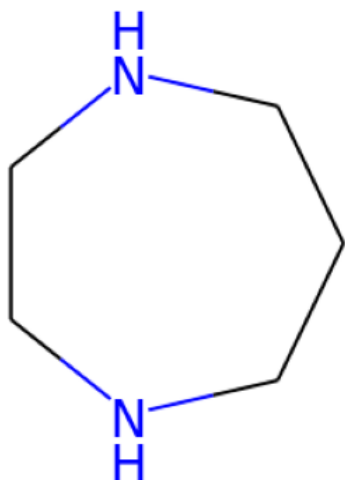

Experimental <sup>13</sup>C NMR (solvent: CDCl<sub>3</sub>)

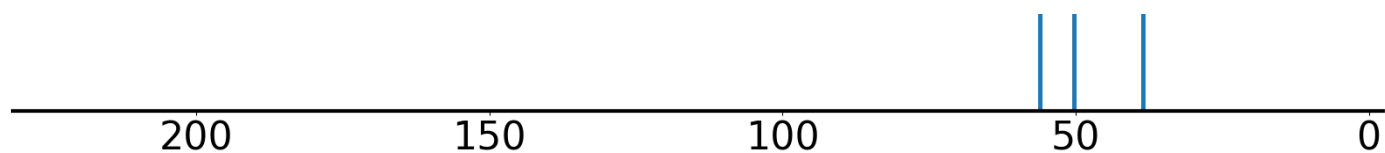

Experimental <sup>1</sup>H NMR (solvent: CDCl<sub>3</sub>)

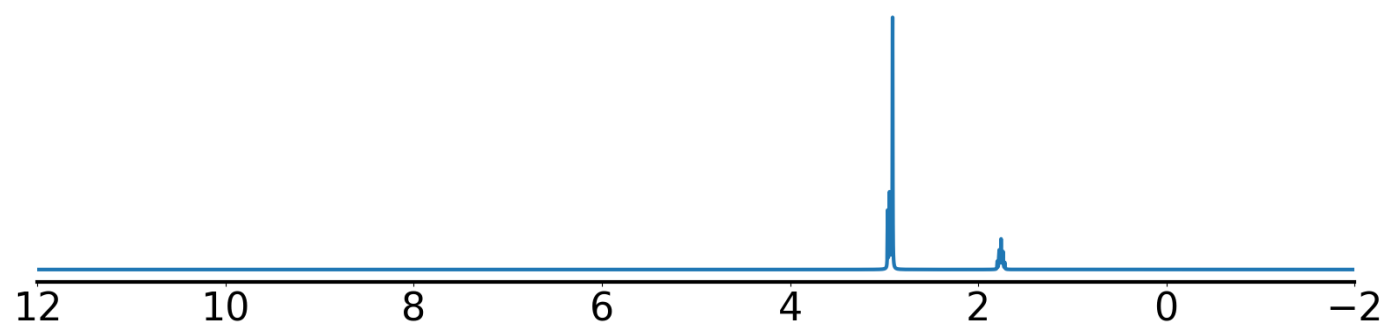

Top predicted structures (loss):

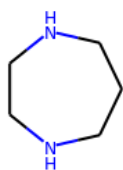

0.012311

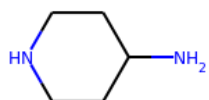

0.023138

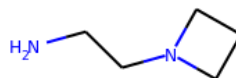

0.023454

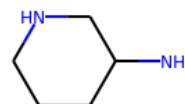

0.027873

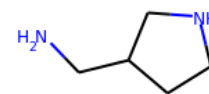

0.028366

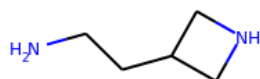

0.030343

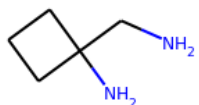

0.033374

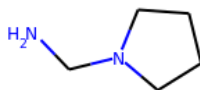

0.033552

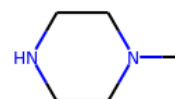

0.034828

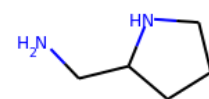

0.035725

Top predicted substructures  
 [#7X3][#6H2]

prob  
 0.9729

[CX4H2][CX4H2]

0.8451



|                          |        |                                   |        |
|--------------------------|--------|-----------------------------------|--------|
| [CX4H2]([#6])[#6]        | 0.9663 | [#6H2][#7][#6H2]                  | 0.7754 |
| [#7][#6H2]               | 0.9604 | [CX4H2]([NX3H1])[CX4H2]           | 0.7481 |
| [#7][#6H2][#6H2]         | 0.9363 | [#7X3H1]                          | 0.7274 |
| [#7][#6H2][#6H2][#7]     | 0.8547 | [#7X3H2]                          | 0.6358 |
| best positives           | prob   | best negatives                    | prob   |
| [#7X3][#6H2]             | 0.9729 | [CX3H0](=[CX3H1])([OX2H0])[CX2H0] | 0.0    |
| [CX4H2]([#6])[#6]        | 0.9663 | [CX3H0](=[CX3H2])([OX2H0])[CX3H0] | 0.0    |
| [#7][#6H2]               | 0.9604 | [OX2H0][CX3H1]=[#6X3H0][#8X2H0]   | 0.0    |
| [#7][#6H2][#6H2]         | 0.9363 | [CX3H2]=[#6X3H0][#6X3H0][#8X2H0]  | 0.0    |
| [#7][#6H2][#6H2][#7]     | 0.8547 | C=CC=CC#C                         | 0.0    |
| [CX4H2][CX4H2]           | 0.8451 | C=CCCC#C                          | 0.0    |
| [#6H2][#7][#6H2]         | 0.7754 | [#8]1[#6][#6]=[#6][#6]=[#6]1      | 0.0    |
| [CX4H2]([NX3H1])[CX4H2]  | 0.7481 | [#6H3][#6X3][#6X3]=[#6X3H2]       | 0.0    |
| [#7X3H1]                 | 0.7274 | CC=CC#CC                          | 0.0    |
| [#7][#6][#6][#7]         | 0.6099 | [CX4H1]([OX2H0])([CX3H1])[CX3H0]  | 0.0    |
| worst negatives          | prob   | worst positives                   | prob   |
| [#7X3H2]                 | 0.6358 | [CX4H2]([CX4H2])[CX4H2]           | 0.3753 |
| [#6H1]([#6H2])[#6H2]     | 0.4555 | [#7][#6][#6][#6][#7]              | 0.5167 |
| [#6H1][#6H2]             | 0.399  | [#7][#6][#6][#7]                  | 0.6099 |
| [CX4H2]([NX3H1])[CX4H1]  | 0.39   | [#7X3H1]                          | 0.7274 |
| [#7][#6][#6][#6][#6][#7] | 0.3829 | [CX4H2]([NX3H1])[CX4H2]           | 0.7481 |
| [#6H1]                   | 0.3811 | [#6H2][#7][#6H2]                  | 0.7754 |
| [#7H2][#6H2]             | 0.3281 | [CX4H2][CX4H2]                    | 0.8451 |
| [CX4H3]                  | 0.2858 | [#7][#6H2][#6H2][#7]              | 0.8547 |
| [CX4H2]([CX4H2])[CX4H1]  | 0.2241 | [#7][#6H2][#6H2]                  | 0.9363 |
| [#7H2][#6H1]             | 0.2211 | [#7][#6H2]                        | 0.9604 |

---

Example 132 true smiles: NC(CO)C(=O)O formula: C3H7NO3  
 Index of correct structure: 0 of 576  
 True structure loss: 0.021597  
 True structure:

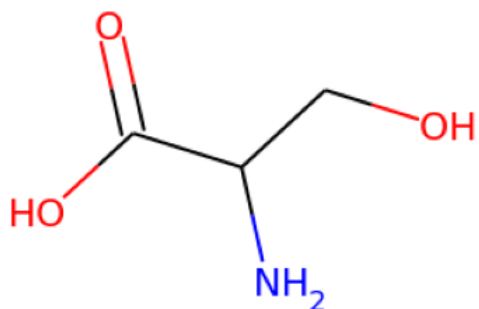

Experimental <sup>13</sup>C NMR (solvent: D2O)

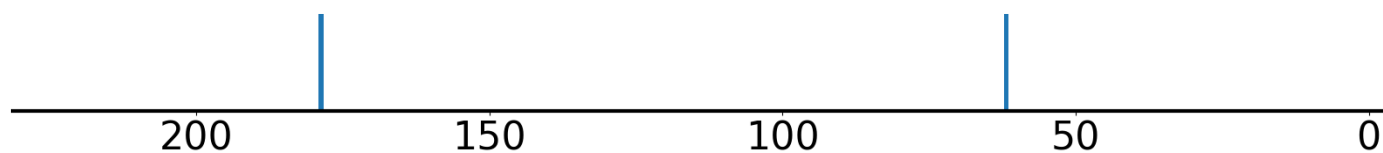

Experimental <sup>1</sup>H NMR (solvent: D2O)

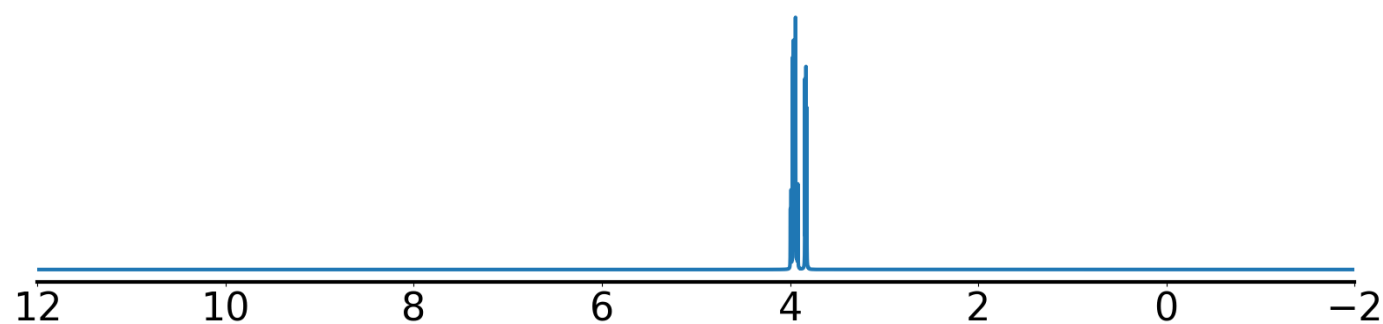

Top predicted structures (loss):

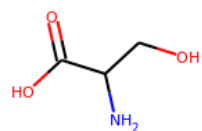

0.021597

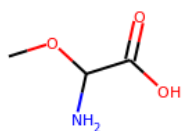

0.036092

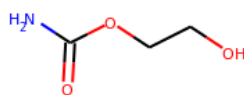

0.041058

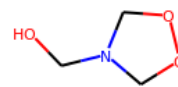

0.04681

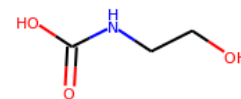

0.049029

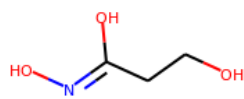

0.049246

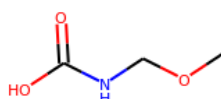

0.05125

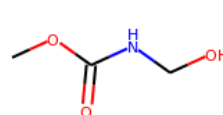

0.051951

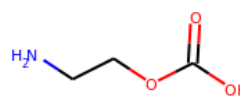

0.053941

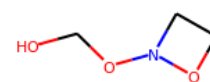

0.054471

Top predicted substructures  
[CX3](=[OX1])C

prob  
 0.9709

[CX3](=[OX1])O

0.824

|                         |        |                                  |        |
|-------------------------|--------|----------------------------------|--------|
| [OX2H1]                 | 0.9666 | [#8]=[#6H0][#6H1]                | 0.8081 |
| [#8]=[#6][#8]           | 0.8923 | O=[CX3][CX4H]                    | 0.7797 |
| [CX4H2]([#6])[O]        | 0.864  | [#7X3H2]                         | 0.7683 |
| [CX3](=O)[OX2H1]        | 0.8283 | [CX4H2]CC=O                      | 0.7541 |
| best positives          | prob   | best negatives                   | prob   |
| [CX3](=[OX1])C          | 0.9709 | [CX2H1]#[CX2H0][CX3H1]=[CX3H0]   | 0.0    |
| [OX2H1]                 | 0.9666 | CC=CCC#C                         | 0.0    |
| [#8]=[#6][#8]           | 0.8923 | [CX2H0]([#CX2H1])[CX4H2]         | 0.0    |
| [CX4H2]([#6])[O]        | 0.864  | CC=CC#CC                         | 0.0    |
| [CX3](=O)[OX2H1]        | 0.8283 | [CX4H2]([CX4H3])[CX2H0]          | 0.0    |
| [CX3](=[OX1])O          | 0.824  | [#6H2][#6]#[#6X2]                | 0.0    |
| [#8]=[#6H0][#6H1]       | 0.8081 | [#6X3][#6]#[#6][#6H3]            | 0.0    |
| O=[CX3][CX4H]           | 0.7797 | [#6X2][#6H1][#6X2]               | 0.0    |
| [#7X3H2]                | 0.7683 | [CX2H0]([#CX2H0])[CX4H0]         | 0.0    |
| [CX4H2]CC=O             | 0.7541 | CCC#CC=C                         | 0.0    |
| worst negatives         | prob   | worst positives                  | prob   |
| [#8][#6][#6H2]          | 0.5467 | [#8][#6H0][#6H1]                 | 0.1484 |
| [#7H2][#6H0]            | 0.3305 | [CX4H1]([NX3H2])([CX4H2])[CX3H0] | 0.2368 |
| [CX4H2]([OX2H1])[CX4H2] | 0.3033 | OCC[CH2]                         | 0.2631 |
| [#8][#6][#6][#8]        | 0.2452 | [#6H1][#6H2]                     | 0.3436 |
| [CH2X4](O)[CX4H2]       | 0.2288 | [CX4H2](O)[CHX4]                 | 0.3481 |
| [#7][#6H0][#6H1]        | 0.2254 | [#8][#6H2][#6H][#6X3]            | 0.4181 |
| [#7X3H1]                | 0.2071 | [#8][#6][#6][#6X3]               | 0.419  |
| [CX4H2][CX3]=O          | 0.2015 | [CX4H2]([OX2H1])[CX4H1]          | 0.4192 |
| [CX4H2][CX4H2]          | 0.1807 | [#7][#6][#6X3]                   | 0.5001 |
| [#8]=[#6][#6H1][#6H1]   | 0.1802 | [#7H2][#6H1]                     | 0.5054 |

---

Example 133 true smiles: NC(CO)C(=O)O formula: C3H7NO3  
 Index of correct structure: 0 of 576  
 True structure loss: 0.023511  
 True structure:

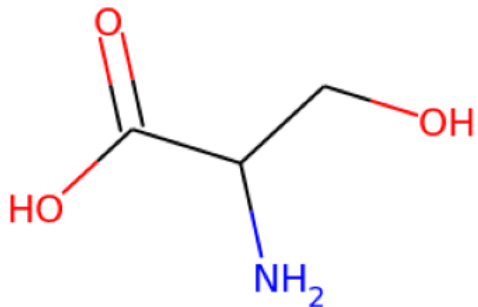

Experimental 13C NMR (solvent: D2O)

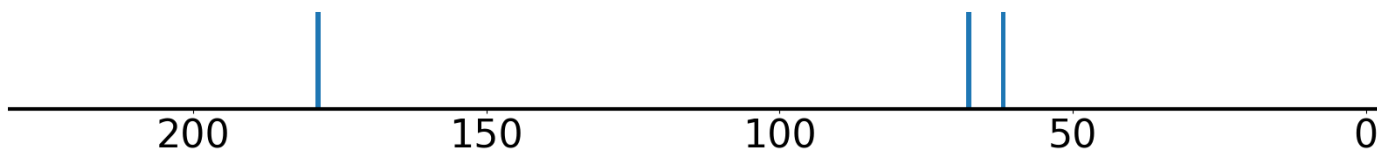

Experimental 1H NMR (solvent: d2o)

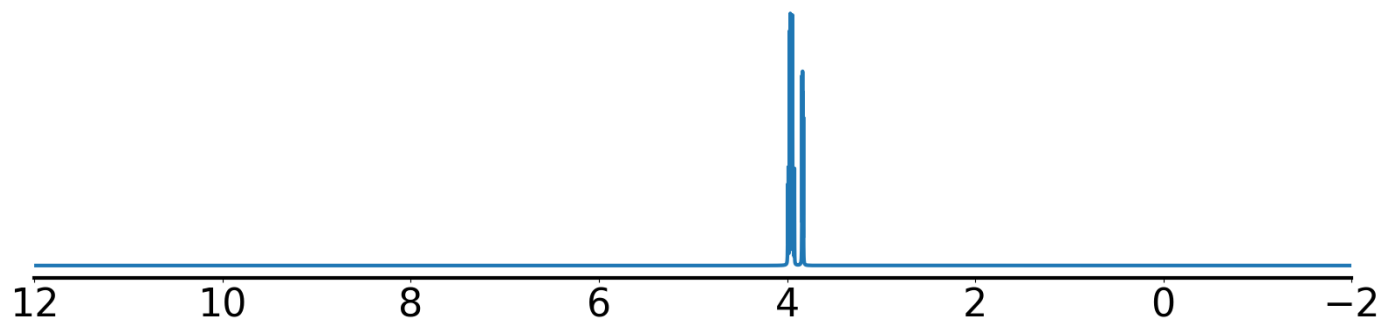

Top predicted structures (loss):

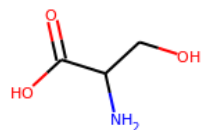

0.023511

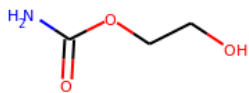

0.034598

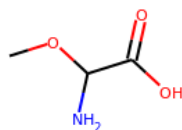

0.04088

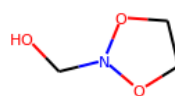

0.048102

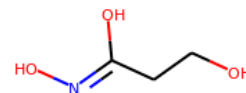

0.048228

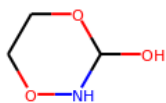

0.048606

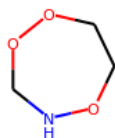

0.050717

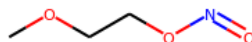

0.052142

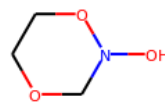

0.05223

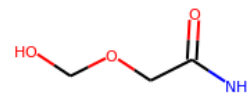

0.05311

Top predicted substructures  
[CX4H2]([#6])[O]

prob  
 0.9831

[#7X3H2]

0.7948

|                              |        |                                  |        |
|------------------------------|--------|----------------------------------|--------|
| [OX2H1]                      | 0.9727 | [#8]=[#6H0][#6H1]                | 0.7874 |
| [CX3](=[OX1])C               | 0.9698 | O=[CX3][CX4H]                    | 0.7708 |
| [#8]=[#6][#8]                | 0.8216 | [#8][#6H2][#6H1][#6H0]           | 0.7487 |
| [CX4H2]CC=O                  | 0.7985 | [#8H][#6H2][#6H1]                | 0.7033 |
| <br>                         |        |                                  |        |
| best positives               | prob   | best negatives                   | prob   |
| [CX4H2]([#6])[O]             | 0.9831 | [CX2H1]#[CX2H0][CX3H1]=[CX3H0]   | 0.0    |
| [OX2H1]                      | 0.9727 | CC=CCC#C                         | 0.0    |
| [CX3](=[OX1])C               | 0.9698 | CC=CC#CC                         | 0.0    |
| [#8]=[#6][#8]                | 0.8216 | [CX4H2]([CX4H3])[CX2H0]          | 0.0    |
| [CX4H2]CC=O                  | 0.7985 | [#6X2][#6H1][#6X2]               | 0.0    |
| [#7X3H2]                     | 0.7948 | [#6X3][#6]#[#6][#6H3]            | 0.0    |
| [#8]=[#6H0][#6H1]            | 0.7874 | [#6H2][#6]#[#6X2]                | 0.0    |
| O=[CX3][CX4H]                | 0.7708 | [CX4H2]([CX4H0])[CX2H0]          | 0.0    |
| [#8][#6H2][#6H1][#6H0]       | 0.7487 | CCC#CC=C                         | 0.0    |
| [#8H][#6H2][#6H1]            | 0.7033 | [CX2H0]([#CX2H1])[CX4H2]         | 0.0    |
| <br>                         |        |                                  |        |
| worst negatives              | prob   | worst positives                  | prob   |
| [#8][#6][#6H2]               | 0.6953 | [CX4H1]([NX3H2])([CX4H2])[CX3H0] | 0.1569 |
| [#7H2][#6H0]                 | 0.4281 | [#8][#6H0][#6H1]                 | 0.2227 |
| [#8][#6][#6][#8]             | 0.4152 | [#6H1][#6H2]                     | 0.407  |
| [CX4H2][CX4H2]               | 0.4071 | [#7H2][#6H1]                     | 0.4298 |
| O[CX4H2][CX4H2]O             | 0.4031 | [CX3H0]([OX1H0])([OX2H1])[CX4H1] | 0.436  |
| [CH2X4](O)[CX4H2]            | 0.3962 | [#8][#6][#6][#6X3]               | 0.4564 |
| [#8][#6][#6H2][#8]           | 0.3961 | OCC[CH2]                         | 0.4856 |
| [CX4H2]([OX2H0])[CX4H2]      | 0.3322 | [CX4H2](O)[CHX4]                 | 0.4961 |
| [#8][#6][#6]=[#8]            | 0.2676 | [#7][#6][#6X3]                   | 0.5293 |
| [OX2H0][CX4H2][CX4H2][OX2H0] | 0.2431 | [#7H2][#6X4H1][#6X3]             | 0.5381 |

---

Example 134 true smiles: CCCCC(C)=O formula: C7H14O  
 Index of correct structure: 0 of 556  
 True structure loss: 0.006778  
 True structure:

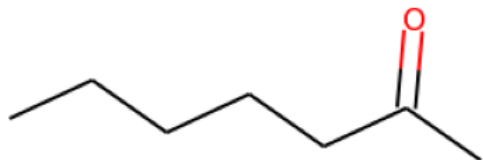

Experimental <sup>13</sup>C NMR (solvent: CDCl<sub>3</sub>)

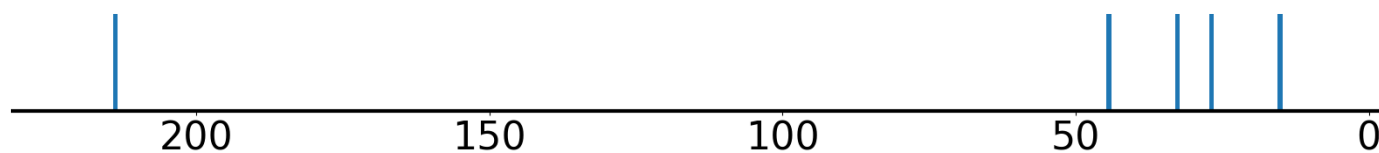

Experimental <sup>1</sup>H NMR (solvent: D<sub>2</sub>O)

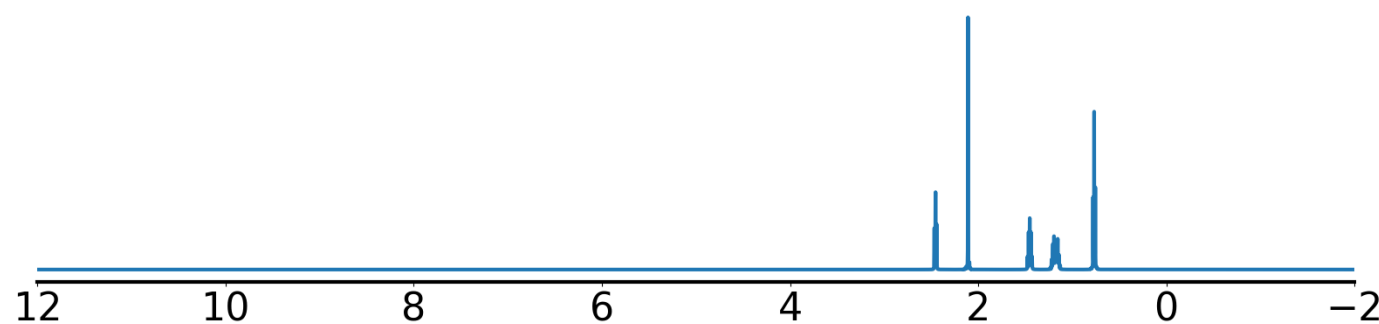

Top predicted structures (loss):

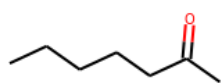

0.006778

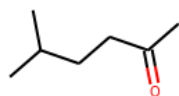

0.034776

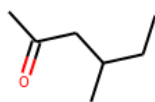

0.035885

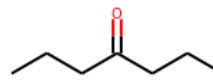

0.049086

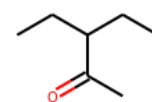

0.054234

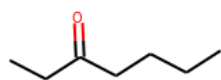

0.060119

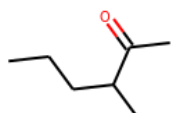

0.061917

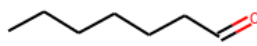

0.067532

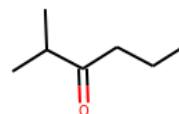

0.072748

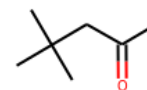

0.079484

Top predicted substructures  
 [CX4H3]

prob  
 1.0

[CX4H3][CX4H2]

0.9995

|                                   |        |                                   |        |
|-----------------------------------|--------|-----------------------------------|--------|
| [CX4H2]([#6])[#6]                 | 0.9999 | [CX4H3][CX3H0]                    | 0.9992 |
| [#6H3][#6][#6]                    | 0.9999 | [CX4H3][CX3]                      | 0.9989 |
| [CX3](=[OX1])C                    | 0.9997 | [OX1H0]=[CX3H0][CX4H3]            | 0.9987 |
| [CX4H3][#6]                       | 0.9996 | [CX3H0](=[OX1H0])([CX4H3])[CX4H2] | 0.9769 |
| best positives                    | prob   | best negatives                    | prob   |
| [CX4H3]                           | 1.0    | [CX2H0](#[CX2H1])[CX3H0]          | 0.0    |
| [CX4H2]([#6])[#6]                 | 0.9999 | C=CC=CC#C                         | 0.0    |
| [#6H3][#6][#6]                    | 0.9999 | [CX2H0](#[CX2H0])[CX2H0]          | 0.0    |
| [CX3](=[OX1])C                    | 0.9997 | [CX3H0](=[CX3H1])([OX2H0])[CX2H0] | 0.0    |
| [CX4H3][#6]                       | 0.9996 | [CX2H0](#[CX2H1])[CX3H1]          | 0.0    |
| [CX4H3][CX4H2]                    | 0.9995 | [CX2H1]#[CX2H0][CX3H1]=[CX3H0]    | 0.0    |
| [CX4H3][CX3H0]                    | 0.9992 | [OX1H0]=[CX3H0][CX2H0]#[CX2H1]    | 0.0    |
| [CX4H3][CX3]                      | 0.9989 | [#6X2][#6H1][#6X2]                | 0.0    |
| [OX1H0]=[CX3H0][CX4H3]            | 0.9987 | [CX4H1](=[OX2H0])([CX4H1])[CX2H0] | 0.0    |
| [CX3H0](=[OX1H0])([CX4H3])[CX4H2] | 0.9769 | CCC#CC#C                          | 0.0    |
| worst negatives                   | prob   | worst positives                   | prob   |
| [#6H1]                            | 0.4646 | [CX4H2][CX4H2][CX4H2][CX4H2]      | 0.4765 |
| [#6H1][#6H2]                      | 0.4448 | [CX4H2]([CX4H2])[CX4H2]           | 0.6509 |
| [CX4H2]([CX4H1])[CX3H0]           | 0.3074 | [CX4H2][CX4H2]                    | 0.7293 |
| [CX4H2]([CX4H3])[CX4H1]           | 0.2626 | [CX4H2]([CX4H2])[CX3H0]           | 0.7635 |
| [#6X3][#6][#6][#6H3]              | 0.2416 | O=[CX3H0][CX4H2][CX4H2]           | 0.807  |
| [#6H1]([#6H2])[#6H2]              | 0.2262 | [CX4H2]CC=O                       | 0.8609 |
| O=[CX3H0][CX4H2][CX4H1]           | 0.1597 | [CX4H2]([CX4H3])[CX4H2]           | 0.8841 |
| [#6H3][#6][#6][#6H3]              | 0.1377 | CCCCC                             | 0.9076 |
| [#8]=[#6][#6H2][#6H1]             | 0.1072 | [#6H3][#6X3H0][#6H2]              | 0.9153 |
| [#6H3][#6][#6X3]                  | 0.1032 | [CX4H2][CX3]=O                    | 0.9182 |

---

Example 135 true smiles: CCCC(=O)CCC formula: C7H14O  
 Index of correct structure: 0 of 556  
 True structure loss: 0.008486  
 True structure:

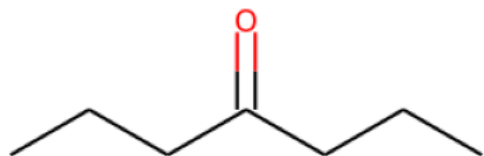

Experimental <sup>13</sup>C NMR (solvent: CDCl<sub>3</sub>)

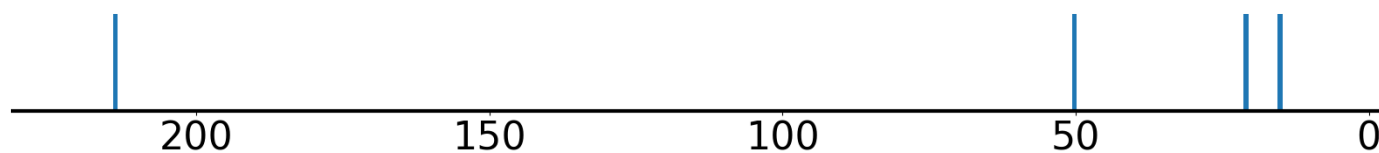

Experimental <sup>1</sup>H NMR (solvent: D<sub>2</sub>O)

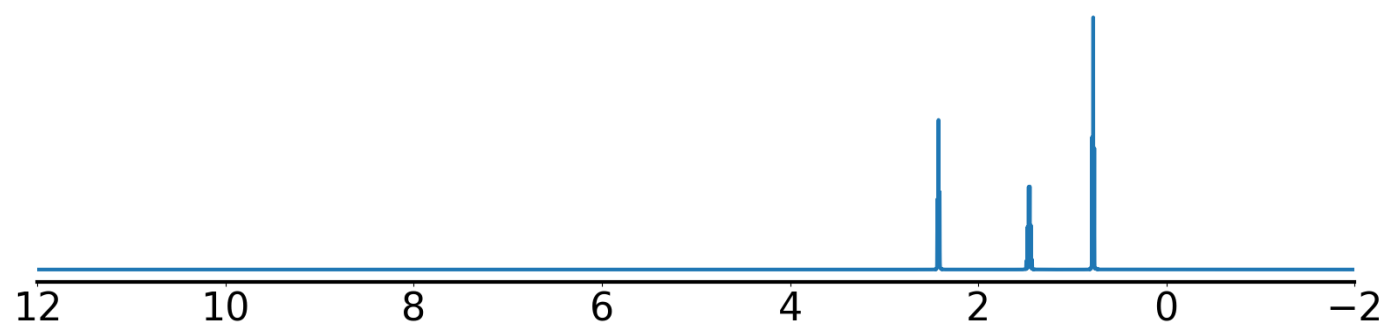

Top predicted structures (loss):

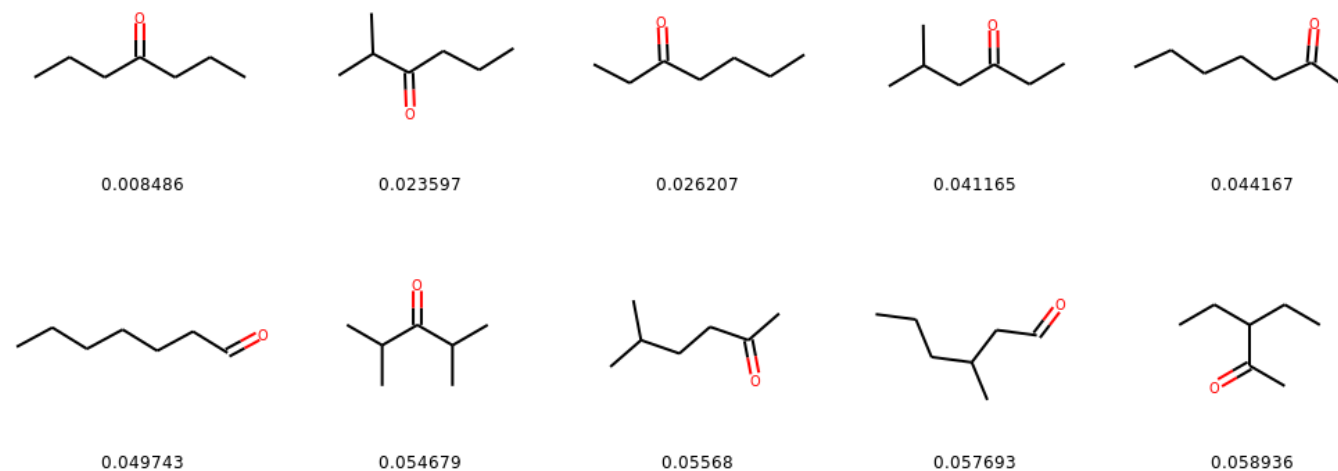

Top predicted substructures  
 [CX4H3][#6]

prob  
 0.9999

[CX4H3][CX4H2]

0.9976



|                                   |        |                                   |        |
|-----------------------------------|--------|-----------------------------------|--------|
| [CX4H3]                           | 0.9998 | [OX1H0]=[CX3H0]([#6])[CX4H2]      | 0.9847 |
| [CX3](=[OX1])C                    | 0.9997 | [CX4H2]([CX4H3])[CX4H2]           | 0.9812 |
| [CX4H2]([#6])[#6]                 | 0.9994 | [CX4H2][CX3]=O                    | 0.8176 |
| [#6H3][#6][#6]                    | 0.9984 | [CX3H0](=[OX1H0])([CX4H2])[CX4H2] | 0.816  |
| best positives                    | prob   | best negatives                    | prob   |
| [CX4H3][#6]                       | 0.9999 | [CX2H0](#[CX2H1])[CX3H0]          | 0.0    |
| [CX4H3]                           | 0.9998 | CCC#CC#C                          | 0.0    |
| [CX3](=[OX1])C                    | 0.9997 | C=CC=CC#C                         | 0.0    |
| [CX4H2]([#6])[#6]                 | 0.9994 | CC=CC#CC                          | 0.0    |
| [#6H3][#6][#6]                    | 0.9984 | [CX2H0](#[NX1H0])[CX3H1]          | 0.0    |
| [CX4H3][CX4H2]                    | 0.9976 | [#6X2][#6H1][#6X2]                | 0.0    |
| [OX1H0]=[CX3H0]([#6])[CX4H2]      | 0.9847 | [CX2H1]#[CX2H0][CX3H1]=[CX3H0]    | 0.0    |
| [CX4H2]([CX4H3])[CX4H2]           | 0.9812 | [CX2H1]#[CX2H0][CX4H1][OX2H1]     | 0.0    |
| [CX4H2][CX3]=O                    | 0.8176 | [CX2H0](#[CX2H0])[CX2H0]          | 0.0    |
| [CX3H0](=[OX1H0])([CX4H2])[CX4H2] | 0.816  | CCC#CC=C                          | 0.0    |
| worst negatives                   | prob   | worst positives                   | prob   |
| [#6H1]                            | 0.4277 | CCCCC                             | 0.5148 |
| [CX4H3][CX4H1]                    | 0.3791 | [CX4H2]CC=O                       | 0.6151 |
| [#8]=[#6][#6H2][#6H1]             | 0.3503 | O=[CX3H0][CX4H2][CX4H2]           | 0.6251 |
| [#8]=[#6H0][#6H1]                 | 0.2882 | [CX4H2]([CX4H2])[CX3H0]           | 0.6543 |
| [#6H1][#6H2]                      | 0.2499 | [#6H2][#6X3H0][#6H2]              | 0.6727 |
| [#6H1]([#6H2])[#6H2]              | 0.2318 | [CX4H2][CX4H2]                    | 0.749  |
| [#6H3][#6][#6X3]                  | 0.2245 | [#6X3][#6][#6][#6H3]              | 0.7993 |
| [CX3H1](=[OX1H0])[CX4H2]          | 0.1605 | [CX3H0](=[OX1H0])([CX4H2])[CX4H2] | 0.816  |
| O=[CX3][CX4H]                     | 0.1579 | [CX4H2][CX3]=O                    | 0.8176 |
| [CHX4]([CH3X4])[CH3X4]            | 0.1528 | [CX4H2]([CX4H3])[CX4H2]           | 0.9812 |

---

Example 136 true smiles: CC(C(=O)O)C(=O)O formula: C4H6O4  
 Index of correct structure: 0 of 502  
 True structure loss: 0.015123  
 True structure:

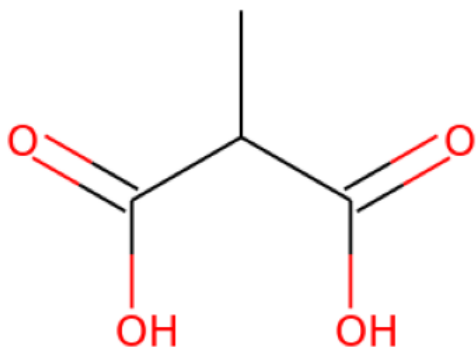

Experimental <sup>13</sup>C NMR (solvent: DMSO)

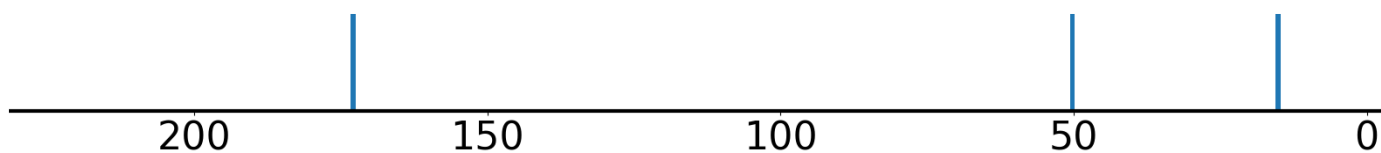

Experimental <sup>1</sup>H NMR (solvent: D2O)

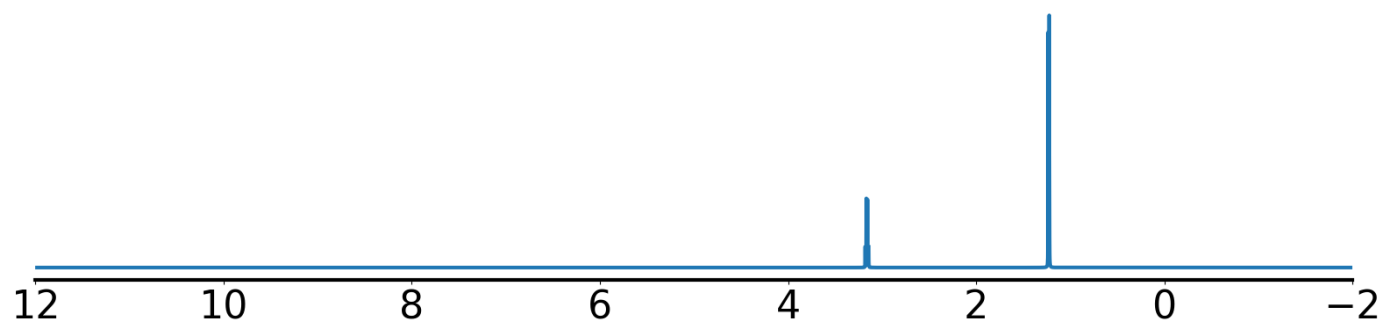

Top predicted structures (loss):

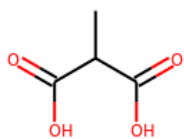

0.015123

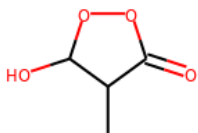

0.036391

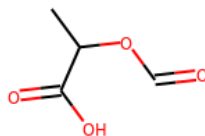

0.059477

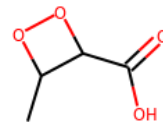

0.062217

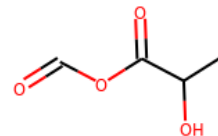

0.064527

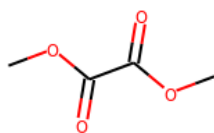

0.067327

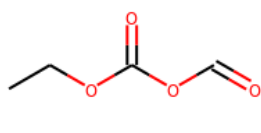

0.067581

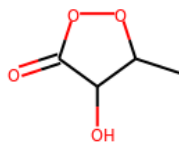

0.068625

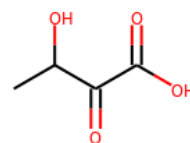

0.069131

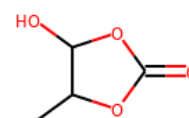

0.070913

Top predicted substructures  
 [CX4H3]

prob  
 0.9995

[#6H1]

0.9596

|                        |        |                                    |        |
|------------------------|--------|------------------------------------|--------|
| [#8]=[#6][#8]          | 0.9982 | [OX2H1]                            | 0.9491 |
| [CX3](=[OX1])O         | 0.9972 | [CX3](=[OX2H1])                    | 0.8703 |
| [CX3](=[OX1])C         | 0.9945 | [CX4H3][#6]                        | 0.8499 |
| [#6H3][#6][#6]         | 0.9752 | [#8][#6H0][#6H1]                   | 0.8234 |
| best positives         | prob   | best negatives                     | prob   |
| [CX4H3]                | 0.9995 | [CX2H1][CX2H0][CX3H1]=[CX3H0]      | 0.0    |
| [#8]=[#6][#8]          | 0.9982 | C=CC=CC#C                          | 0.0    |
| [CX3](=[OX1])O         | 0.9972 | CC=CCC#C                           | 0.0    |
| [CX3](=[OX1])C         | 0.9945 | CC=CC#CC                           | 0.0    |
| [#6H3][#6][#6]         | 0.9752 | [CX3H0](=[CX3H2])([CX4H2])[CX4H2]  | 0.0    |
| [#6H1]                 | 0.9596 | CC#CCC=C                           | 0.0    |
| [OX2H1]                | 0.9491 | CCC=CC#C                           | 0.0    |
| [CX3](=[OX2H1])        | 0.8703 | [#7][#6]=[#6][#6][#6]=[#7]         | 0.0    |
| [CX4H3][#6]            | 0.8499 | [#6X3H1]=[#6X3H1][#6X3H0]=[#6X3H1] | 0.0    |
| [#8][#6H0][#6H1]       | 0.8234 | [CX3H0](=[CX3H2])([CX4H3])[CX4H2]  | 0.0    |
| worst negatives        | prob   | worst positives                    | prob   |
| [#6H1][#6H1]           | 0.5942 | O=[#6][#6][#6X3]                   | 0.1034 |
| [#6X3][#6][#6][#6H3]   | 0.5008 | [CH3]C[OH]                         | 0.3081 |
| [#8][#6H1][#6H1]       | 0.3213 | O=[#6][#6H][#6H0]                  | 0.3483 |
| [CX4H]O                | 0.2991 | [#8][#6][#6][#6X3]                 | 0.3989 |
| [CX4H](O)CO            | 0.2863 | [CX3H0](=[OX1H0])([OX2H1])[CX4H1]  | 0.5252 |
| [#8][#6][#6][#8]       | 0.2159 | [#6H3][#6][#6X3]                   | 0.5336 |
| [#8]=[#6][#6H1][#6H1]  | 0.2106 | [CX4H3][CX4H1]                     | 0.7748 |
| [CH3][#6][#8]          | 0.1993 | [#8]=[#6H0][#6H1]                  | 0.7992 |
| [#8][#6][#6H2]         | 0.1807 | O=[CX3][CX4H]                      | 0.8184 |
| [#8][#6H1][#6H1][#6H3] | 0.1615 | [#8][#6H0][#6H1]                   | 0.8234 |

---

Example 137 true smiles: COC(=O)C(=O)OC formula: C4H6O4  
 Index of correct structure: 0 of 502  
 True structure loss: 0.02006  
 True structure:

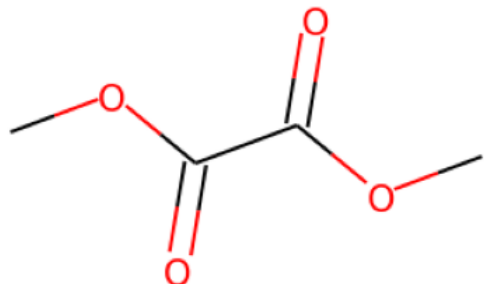

Experimental <sup>13</sup>C NMR (solvent: CDCl<sub>3</sub>)

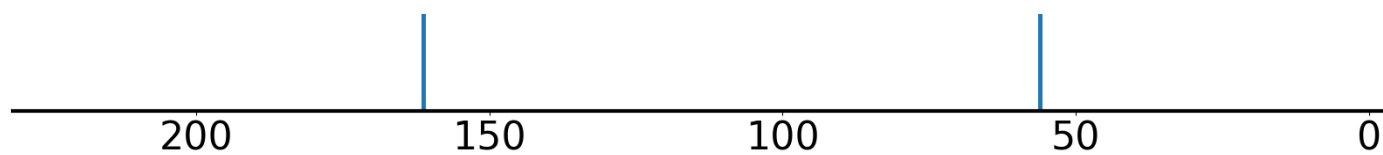

Experimental <sup>1</sup>H NMR (solvent: CDCl<sub>3</sub>)

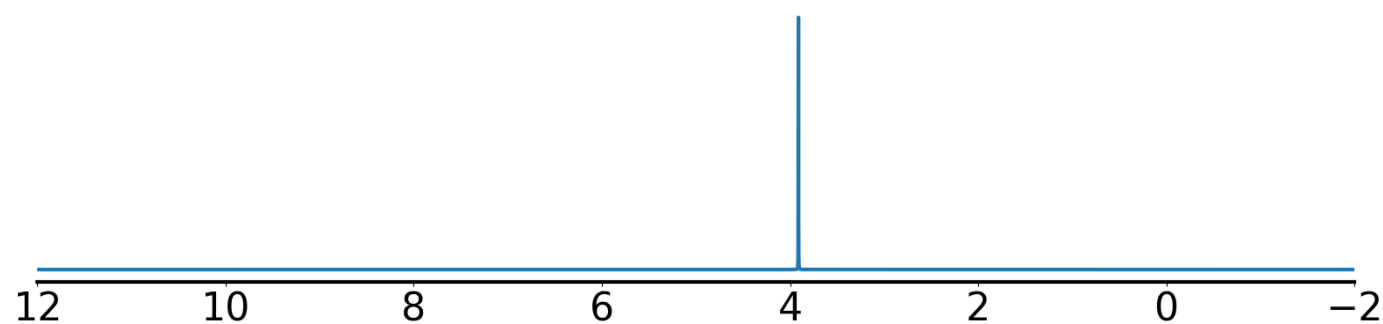

Top predicted structures (loss):

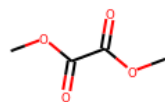

0.02006

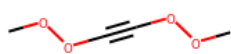

0.027254

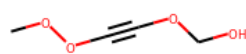

0.027367

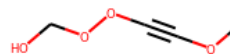

0.027367

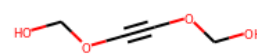

0.03017

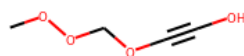

0.053531

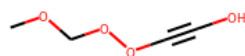

0.059798

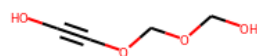

0.064389

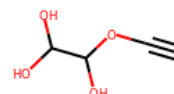

0.067154

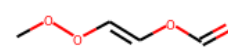

0.067883

Top predicted substructures  
 [#8]=[#6][#8]

prob  
 0.966

[CX4H3]

0.617

|                                   |        |                                       |        |
|-----------------------------------|--------|---------------------------------------|--------|
| [OX1H0]=[CX3H0][OX2H0][CX4H3]     | 0.9409 | [OX2H1]                               | 0.4729 |
| [CX4H3][OX2H0]                    | 0.9008 | [#6X3][#6X3]                          | 0.3049 |
| [CX3](=[OX1])O                    | 0.8793 | [#8][#6][#6H2]                        | 0.2585 |
| [#8][#6][#6][#8]                  | 0.6565 | [#8][#6][#6][#6X3]                    | 0.2551 |
| best positives                    | prob   | best negatives                        | prob   |
| [#8][#6][#6][#8]                  | 0.966  | C=CC=CC#C                             | 0.0    |
| [OX1H0]=[CX3H0][OX2H0][CX4H3]     | 0.9409 | CC=CCC#C                              | 0.0    |
| [CX4H3][OX2H0]                    | 0.9008 | CCC#CC#C                              | 0.0    |
| [CX3](=[OX1])O                    | 0.8793 | [CX2H1]#[CX2H0][CX3H1]=[CX3H0]        | 0.0    |
| [#8][#6][#6][#8]                  | 0.6565 | CC=CC#CC                              | 0.0    |
| [CX4H3]                           | 0.617  | [OX2H0]1[CX4H2][CX4H2][CX4H1][CX4H1]1 | 0.0    |
| [#6X3][#6X3]                      | 0.3049 | [CX3H0](=[CX3H2])([CX4H3])[CX4H2]     | 0.0    |
| [CX3H0](=[OX1H0])([OX2H0])[CX3H0] | 0.2151 | [CX4H3][CX3H0][CX4H2][CX3H1]          | 0.0    |
| [CX3](=[OX1])C                    | 0.1869 | [CX3H0](=[CX3H2])([CX4H3])[CX4H1]     | 0.0    |
| O=CC=O                            | 0.0622 | [OX2H0]1[CX4H2][CX4H1][CX4H1]1        | 0.0    |
| worst negatives                   | prob   | worst positives                       | prob   |
| [OX2H1]                           | 0.4729 | [#8][#6][#6]=[#8]                     | 0.0289 |
| [#8][#6][#6H2]                    | 0.2585 | [#8][#6][#6]=[#8]                     | 0.0408 |
| [#8][#6][#6][#6X3]                | 0.2551 | O=CC=O                                | 0.0622 |
| [#6H1]                            | 0.2511 | [CX3](=[OX1])C                        | 0.1869 |
| [CX3](=O)[OX2H1]                  | 0.1924 | [CX3H0](=[OX1H0])([OX2H0])[CX3H0]     | 0.2151 |
| [#8][#6H0][#6H1]                  | 0.1581 | [#6X3][#6X3]                          | 0.3049 |
| [#6H1][#6H1]                      | 0.1112 | [CX4H3]                               | 0.617  |
| [#6H3][#8][#6H0][#8]              | 0.0907 | [#8][#6][#6][#8]                      | 0.6565 |
| [#8][#6H1][#6H1]                  | 0.0815 | [CX3](=[OX1])O                        | 0.8793 |
| [CX4H](O)CO                       | 0.0758 | [CX4H3][OX2H0]                        | 0.9008 |

---

Example 138 true smiles: Oc1ccncc1 formula: C5H5NO  
 Index of correct structure: 0 of 371  
 True structure loss: 0.01149  
 True structure:

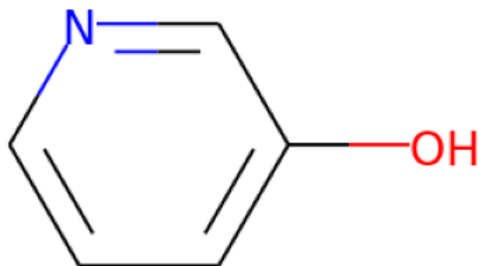

Experimental <sup>13</sup>C NMR (solvent: CDCl<sub>3</sub>)

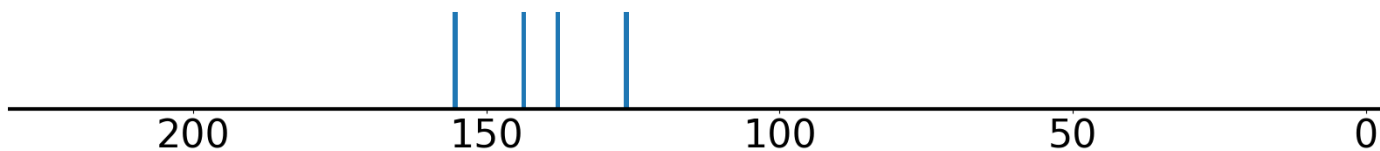

Experimental <sup>1</sup>H NMR (solvent: CDCl<sub>3</sub>)

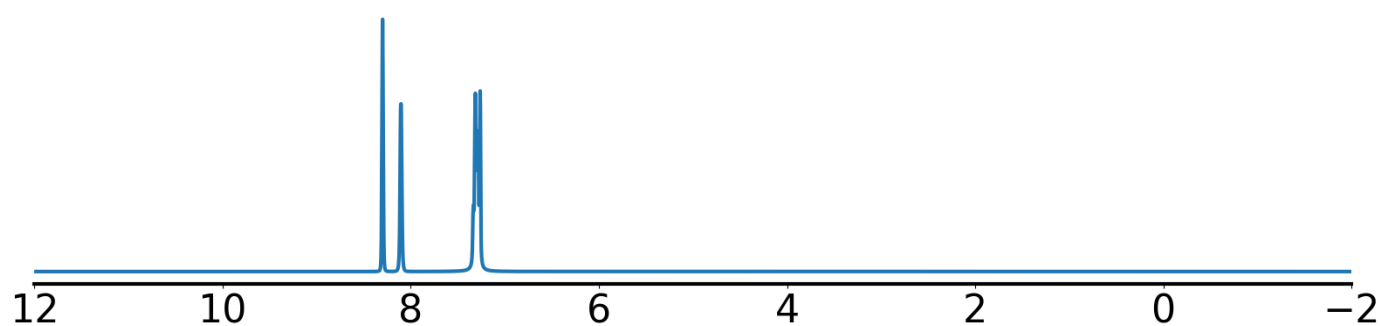

Top predicted structures (loss):

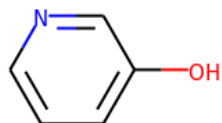

0.01149

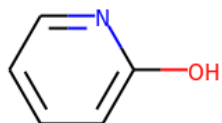

0.012264

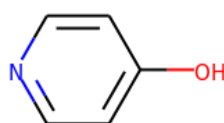

0.016269

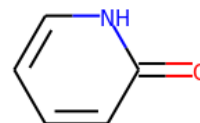

0.038359

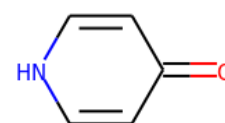

0.042365

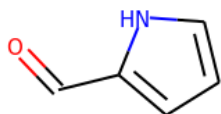

0.051

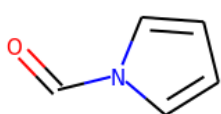

0.055451

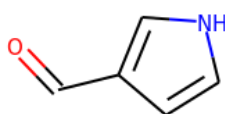

0.05981

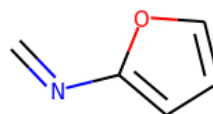

0.060799

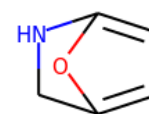

0.07308

Top predicted substructures  
 [#6H1]

prob  
 0.9999

[#7][#6][#6X3]

0.9911

|                            |        |                                           |        |
|----------------------------|--------|-------------------------------------------|--------|
| [#6X3][#6X3]               | 0.9996 | [cX3H1]([cX3H1])[cX3H1]                   | 0.9846 |
| [#6X3][#6X3][#6X3][#6X3]   | 0.9984 | [#7][#6][#6][#6X3]                        | 0.9807 |
| [cH][cH]                   | 0.9967 | [#6]1[#6][#6][#6][#6][#7]1                | 0.9789 |
| [cH]                       | 0.9946 | [#6X3H1][#6X3H0]                          | 0.9628 |
| best positives             | prob   | best negatives                            | prob   |
| [#6H1]                     | 0.9999 | [OX2H0]1[CX4H2][CX4H2][CX4H1][CX4H1]1     | 0.0    |
| [#6X3][#6X3]               | 0.9996 | [CX4H0]([CX4H3])([CX4H2])([CX4H2])[CX3H0] | 0.0    |
| [#6X3][#6X3][#6X3][#6X3]   | 0.9984 | [CX4H0]([NX3H1])([CX4H3])([CX4H2])[CX4H1] | 0.0    |
| [cH][cH]                   | 0.9967 | [CX4H1]([OX2H1])([CX4H2])[CX2H0]          | 0.0    |
| [cH]                       | 0.9946 | [OX2H0]1[CX4H2][CX4H2][CX4H0]1            | 0.0    |
| [#7][#6][#6X3]             | 0.9911 | [OX2H1][CX4H1]1[CX4H1][CX4H2][CX4H1]1     | 0.0    |
| [cX3H1]([cX3H1])[cX3H1]    | 0.9846 | [CX4H0]([OX2H0])([CX4H3])([CX4H2])[CX4H2] | 0.0    |
| [#7][#6][#6][#6X3]         | 0.9807 | [CX3H0]([CX3H2])([CX4H3])[CX4H0]          | 0.0    |
| [#6]1[#6][#6][#6][#6][#7]1 | 0.9789 | [OX2H0]1[CX4H2][CX4H1][CX4H1]1            | 0.0    |
| [#6X3H1][#6X3H0]           | 0.9628 | [OX2H0][CX4H2][CX4H1]([CX4H1])[CX4H1]     | 0.0    |
| worst negatives            | prob   | worst positives                           | prob   |
| [#7][#6H0][#6H1]           | 0.7332 | [OX2H][cX3]:[c]                           | 0.347  |
| [#7][#6X3H0][#6X3H1]       | 0.7118 | [cH]cO                                    | 0.3983 |
| [#6]1[#6][#6][#6][#6][#6]1 | 0.3251 | [#8][#6H0][#6H1]                          | 0.517  |
| [#7X3H2]                   | 0.3039 | [cX3H1]([nX2H0])[cX3H0]                   | 0.6028 |
| O=[#6][#6][#6X3]           | 0.2547 | [#6H1][#7][#6H1]                          | 0.743  |
| [#7H2][#6H0]               | 0.2275 | [#6X3H1][#6X3H1][#6X3H0][#6X3H1]          | 0.7644 |
| [#6X3][#7X3][#6X3]         | 0.1575 | [OX2H1]                                   | 0.7846 |
| [#7H][#6X3H1]              | 0.1489 | [#8][#6][#6][#6X3]                        | 0.8555 |
| o[cH]                      | 0.1355 | [#6X3][#7][#6X3]                          | 0.9162 |
| [#7X3H1]                   | 0.1295 | [#6H1][#6H1]                              | 0.9212 |

---

Example 139 true smiles: O=c1cc[nH]c1 formula: C5H5NO  
 Index of correct structure: 1 of 371  
 True structure loss: 0.04109  
 True structure:

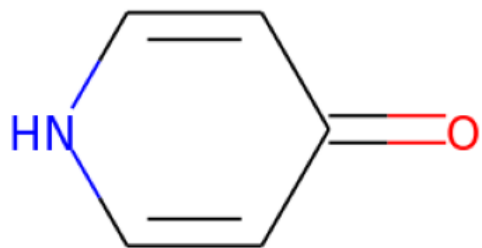

Experimental <sup>13</sup>C NMR (solvent: D2O)

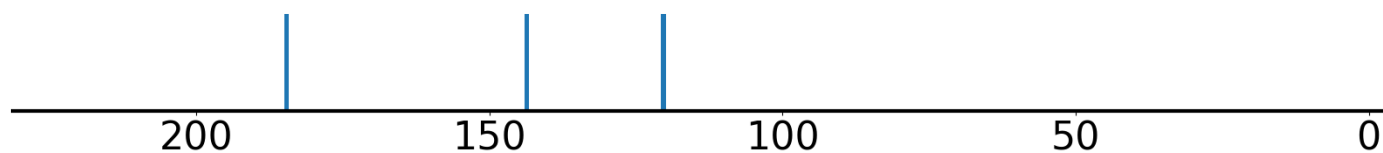

Experimental <sup>1</sup>H NMR (solvent: CDCl3)

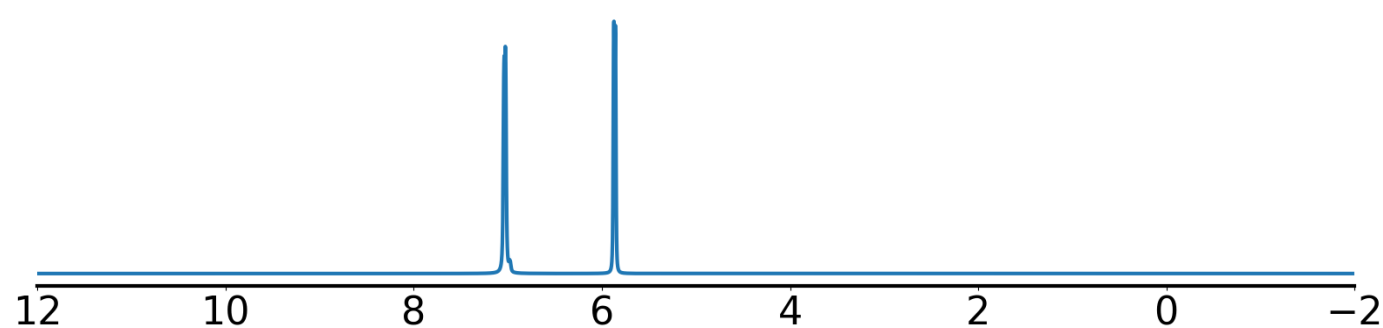

Top predicted structures (loss):

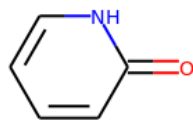

0.03829

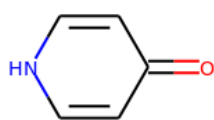

0.04109

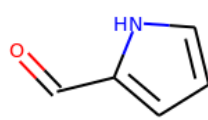

0.046299

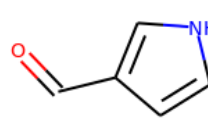

0.05235

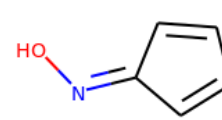

0.056054

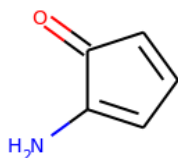

0.056478

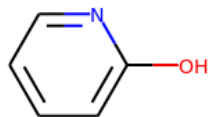

0.057749

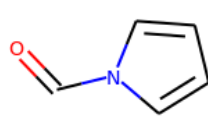

0.058017

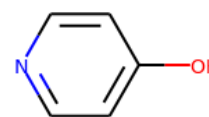

0.060548

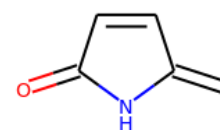

0.060651

Top predicted substructures  
 [#6H1]

prob  
 0.9992

[#8]=[#6H0][#6H1]

0.7819



|                          |        |                                           |        |
|--------------------------|--------|-------------------------------------------|--------|
| [#6X3][#6X3]             | 0.9849 | [CX3](=[OX1])C                            | 0.7285 |
| [#6X3H1][#6X3H0]         | 0.8087 | O=[#6][#6][#6X3]                          | 0.6833 |
| [CHX3](=C)C              | 0.8007 | O=[#6][#6]=[#6X3]                         | 0.6584 |
| [#6H1][#6H1]             | 0.7824 | [#7][#6][#6][#6X3]                        | 0.6362 |
| best positives           | prob   | best negatives                            | prob   |
| [#6H1]                   | 0.9992 | [OX2H0]1[CX4H2][CX4H2][CX4H1][CX4H1]1     | 0.0    |
| [#6X3][#6X3]             | 0.9849 | [OX2H0][CX4H2][CX4H2][CX4H1][OX2H0]       | 0.0    |
| [#6X3H1][#6X3H0]         | 0.8087 | [OX2H0][CX4H2][CX4H1]([CX4H1])[CX4H3]     | 0.0    |
| [#6H1][#6H1]             | 0.7824 | [CX4H0]([CX4H3])([CX4H2])([CX4H2])[CX3H0] | 0.0    |
| [#8]=[#6H0][#6H1]        | 0.7819 | [OX2H1][CX4H1]1[CX4H1][CX4H2][CX4H1]1     | 0.0    |
| O=[#6][#6][#6X3]         | 0.6833 | [CX4H0]([OX2H0])([CX4H3])([CX4H2])[CX4H2] | 0.0    |
| [#7][#6][#6][#6X3]       | 0.6362 | [CX4H0]([OX2H1])([CX4H3])([CX4H2])[CX4H1] | 0.0    |
| [#6X3][#6X3][#6X3][#6X3] | 0.606  | [OX2H0][CX4H2][CX4H1]([CX4H1])[CX4H1]     | 0.0    |
| [#7][#6][#6X3]           | 0.549  | [OX2H0]1[CX4H2][CX4H1][CX4H1]1            | 0.0    |
| [cH][cH]                 | 0.4907 | [CX4H0]([NX3H1])([CX4H3])([CX4H2])[CX4H1] | 0.0    |
| worst negatives          | prob   | worst positives                           | prob   |
| [CHX3](=C)C              | 0.8007 | O=[cX3]                                   | 0.0846 |
| [CX3](=[OX1])C           | 0.7285 | [#6]1[#6][#6][#6][#6][#7]1                | 0.104  |
| O=[#6][#6]=[#6X3]        | 0.6584 | [cX3H1]([nX3H1])[cX3H1]                   | 0.1165 |
| [#8]=[#6][#6H1]=[#6H1]   | 0.5599 | [#6H1][#7][#6H1]                          | 0.1263 |
| [#7X3H2]                 | 0.5528 | [#7H][#6X3H1]                             | 0.1638 |
| [CHX3]=[CHX3]            | 0.5333 | [#6X3H1][#6X3H1][#6X3H0][#6X3H1]          | 0.1797 |
| O=C[CX3H]                | 0.5135 | [cX3H1]([cX3H1])[cX3H0]                   | 0.2238 |
| [CX3H1](=[CX3H1])[CX3H0] | 0.4813 | [#7X3H1]                                  | 0.2569 |
| [cX3H1]([cX3H1])[cX3H1]  | 0.4549 | [cH]                                      | 0.2571 |
| [#7][#6H0][#6H1]         | 0.4496 | [#6X3][#7X3][#6X3]                        | 0.2596 |

---

Example 140 true smiles: CC(C)=CC(=O)O formula: C5H8O2  
 Index of correct structure: 0 of 329  
 True structure loss: 0.015726  
 True structure:

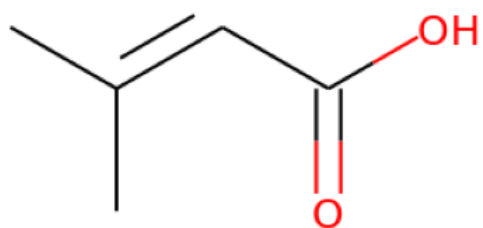

Experimental <sup>13</sup>C NMR (solvent: CDCl<sub>3</sub>)

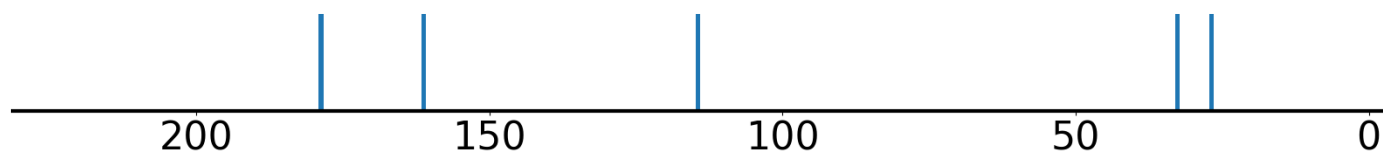

Experimental <sup>1</sup>H NMR (solvent: D<sub>2</sub>O)

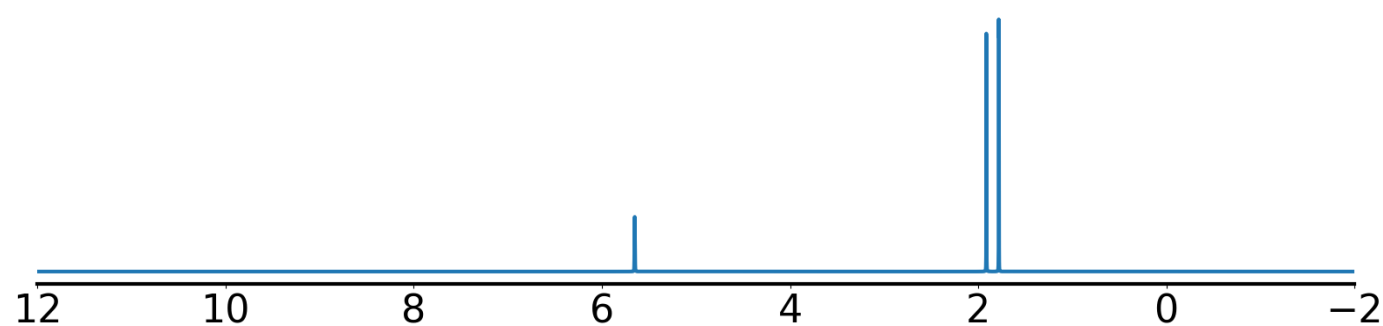

Top predicted structures (loss):

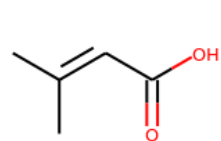

0.015726

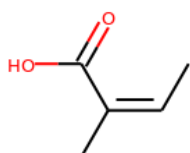

0.050235

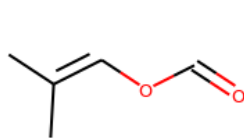

0.063737

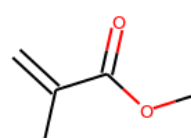

0.092419

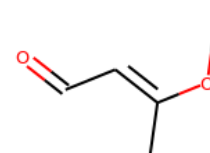

0.095791

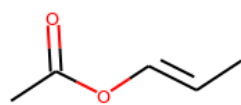

0.097581

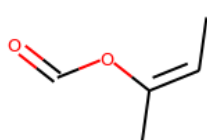

0.097622

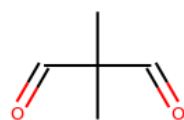

0.099035

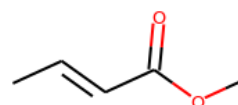

0.099102

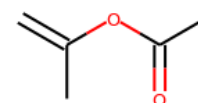

0.108788

Top predicted substructures  
[CX4H3]

prob  
0.9998

[#6H3][#6][#6]

0.9876

|                                   |        |                                              |        |
|-----------------------------------|--------|----------------------------------------------|--------|
| [#6H3][#6H0]                      | 0.9993 | [#8]=[#6][#8]                                | 0.9839 |
| [CX3](=[OX1])C                    | 0.9958 | [CX4H3][#6]                                  | 0.9644 |
| [CX4H3][CX3]                      | 0.9956 | [#6X3][#6X3]                                 | 0.9566 |
| [CX4H3][CX3H0]                    | 0.994  | [CX3](=[OX1])O                               | 0.9282 |
| best positives                    | prob   | best negatives                               | prob   |
| [CX4H3]                           | 0.9998 | [CX4H1]([OX2H0])([CX4H1])[CX2H0]             | 0.0    |
| [#6H3][#6H0]                      | 0.9993 | CCC#CC#C                                     | 0.0    |
| [CX3](=[OX1])C                    | 0.9958 | [OX2H1][CX4H1][CX4H1][CX2H0]                 | 0.0    |
| [CX4H3][CX3]                      | 0.9956 | [CX2H0](#[CX2H1])[CX2H0]                     | 0.0    |
| [CX4H3][CX3H0]                    | 0.994  | [CX4H1]([CX4H2])([CX4H2])[CX2H0]             | 0.0    |
| [#6H3][#6][#6]                    | 0.9876 | [CX2H0](#[CX2H1])[CX4H2]                     | 0.0    |
| [#8]=[#6][#8]                     | 0.9839 | [CX4H1]([CX4H2])([CX4H1])[CX2H0]             | 0.0    |
| [CX4H3][#6]                       | 0.9644 | [OX2H0]1[CX4H2][CX4H2][CX4H1][CX4H1]1        | 0.0    |
| [#6X3][#6X3]                      | 0.9566 | [CX2H0](#[CX2H0])[CX2H0]                     | 0.0    |
| [CX3](=[OX1])O                    | 0.9282 | [OX2H0][CX4H1][CX4H1]([CX4H2][CX4H1])[CX4H1] | 0.0    |
| worst negatives                   | prob   | worst positives                              | prob   |
| [#6H3][#6][#6X3]                  | 0.5667 | [CHX3](=C)C                                  | 0.3164 |
| [OX1H0]=[CX3H0][CX3H0][CX4H3]     | 0.4721 | [#6H1]                                       | 0.4055 |
| [CH3][#6][#8]                     | 0.3466 | [#8][#6][#6]=[#6X3]                          | 0.425  |
| [CX4H3][CX3H0][CX3]=O             | 0.3132 | [#8]=[#6H0][#6H1]                            | 0.4813 |
| [OX1H0]=[CX3H0]([#8])[CX4H2]      | 0.2913 | [#6X3][#6]=[#6][#6H3]                        | 0.5015 |
| O=[#6][#6][#6X3]                  | 0.2827 | [#8][#6X3][#6X3]=[#6X3][#6H3]                | 0.5736 |
| [CX3H0](=[OX1H0])([OX2H1])[CX4H2] | 0.2557 | [#6X3H1][#6X3H0]                             | 0.5766 |
| [CX4H2][CX3]=O                    | 0.1673 | [OX2H1]                                      | 0.5973 |
| [OX1H0]=[CX3H0][CX4H3]            | 0.1398 | [#8][#6H0][#6H1]                             | 0.648  |
| [CX3H0](=[OX1H0])([OX2H1])[CX3H0] | 0.1133 | O=C[CX3H]                                    | 0.6494 |

---

Example 141 true smiles: C=C(CC)C(=O)O formula: C5H8O2  
 Index of correct structure: 0 of 329  
 True structure loss: 0.012184  
 True structure:

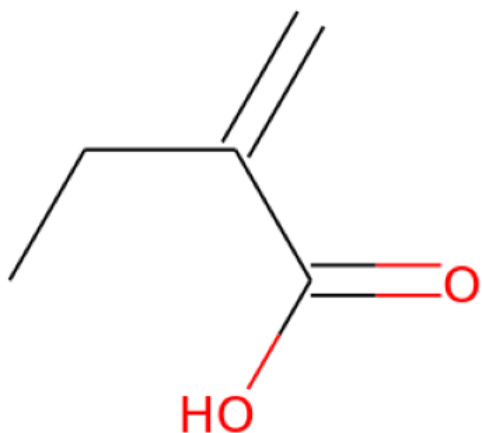

Experimental 13C NMR (solvent: CDCl3)

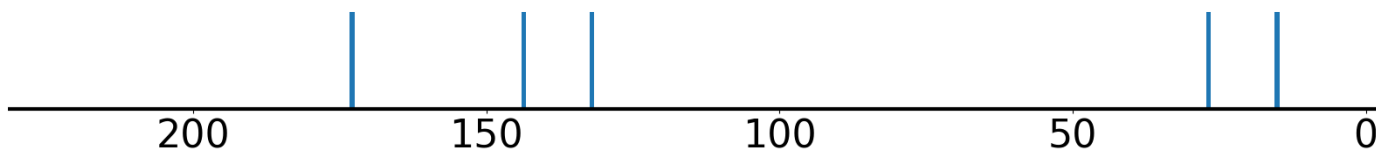

Experimental 1H NMR (solvent: D2O)

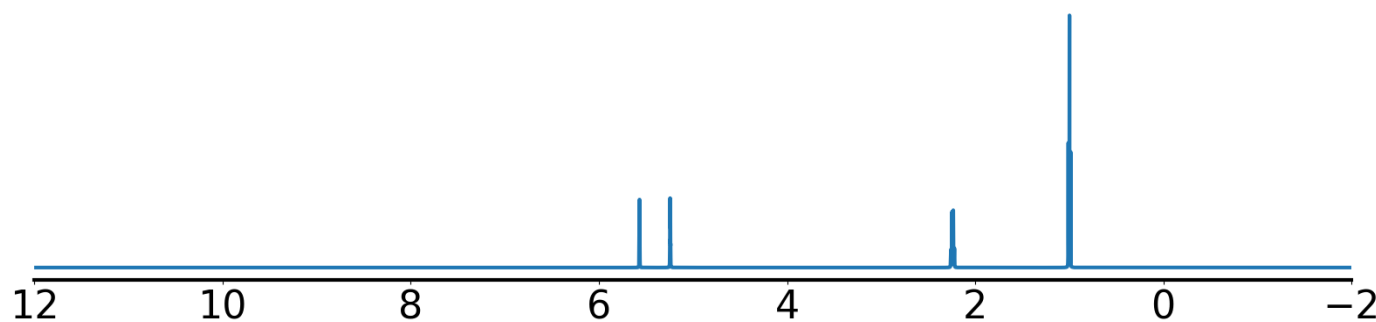

Top predicted structures (loss):

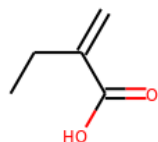

0.012184

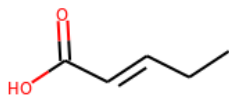

0.054155

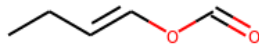

0.090765

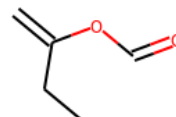

0.092741

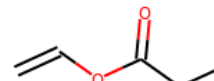

0.103478

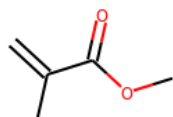

0.106921

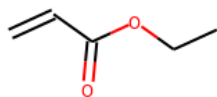

0.107536

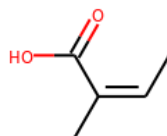

0.113536

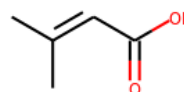

0.113587

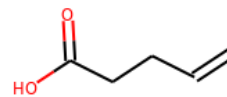

0.118296

Top predicted substructures  
 [CX4H3][#6]

prob  
 0.9998

[#8]=[#6][#8]

0.9953

|                              |        |                                   |        |
|------------------------------|--------|-----------------------------------|--------|
| [CX4H3]                      | 0.9996 | [CX3](=[OX1])O                    | 0.9943 |
| [CX4H2]([#6])[#6]            | 0.9992 | [CX3](=[OX1])C                    | 0.9912 |
| [CX4H3][CX4H2]               | 0.9988 | [CX4H2][CX3]=C                    | 0.9701 |
| [#6H3][#6][#6]               | 0.9954 | [CX3](=O)[OX2H1]                  | 0.967  |
| best positives               | prob   | best negatives                    | prob   |
| [CX4H3][#6]                  | 0.9998 | [CX2H0](#[CX2H0])[CX2H0]          | 0.0    |
| [CX4H3]                      | 0.9996 | [CX2H0](#[CX2H1])[CX4H2]          | 0.0    |
| [CX4H2]([#6])[#6]            | 0.9992 | [CX2H0](#[CX2H1])[CX4H0]          | 0.0    |
| [CX4H3][CX4H2]               | 0.9988 | CCC#CC#C                          | 0.0    |
| [#6H3][#6][#6]               | 0.9954 | [#6H2][#6]#[#6X2]                 | 0.0    |
| [#8]=[#6][#8]                | 0.9953 | [CX2H0](#[CX2H1])[CX4H1]          | 0.0    |
| [CX3](=[OX1])O               | 0.9943 | [#6X2][#6H1][#6X2]                | 0.0    |
| [CX3](=[OX1])C               | 0.9912 | [CX2H0](#[CX2H0])[CX4H1]          | 0.0    |
| [CX4H2][CX3]=C               | 0.9701 | [CX2H0](#[CX2H1])[CX2H0]          | 0.0    |
| [CX3](=O)[OX2H1]             | 0.967  | [CX4H1]([CX4H1])([CX4H1])[CX2H0]  | 0.0    |
| worst negatives              | prob   | worst positives                   | prob   |
| [#6H1]                       | 0.6156 | [#6X3][#6][#6][#6H3]              | 0.2924 |
| [CHX3](=C)C                  | 0.405  | [CX4H2]CC=O                       | 0.4542 |
| O=[#6][#6][#6X3]             | 0.257  | [CX3H0](=[CX3H2])([CX4H2])[CX3H0] | 0.4638 |
| [#8]=[#6H0][#6H1]            | 0.2322 | OCC[CH2]                          | 0.6192 |
| [#6X3H1]=[#6X3H0]            | 0.2003 | [#6H2][#6X3H0]=[#6H2]             | 0.628  |
| [#6X3H1][#6X3H0]             | 0.1959 | [#6X3H2]                          | 0.724  |
| [#6H1][#6H2]                 | 0.1929 | [CX3H2]=[CX3H0]                   | 0.7368 |
| [CHX3]=[CHX3]                | 0.1691 | [CX3H2]=[CX3H0]([#6])[#6]         | 0.7982 |
| [CX4H2][CX3H]                | 0.1475 | [CX3H2]=[CX3H0][CX3H0]            | 0.802  |
| [OX1H0]=[CX3H0]([#8])[CX4H2] | 0.1475 | [CX3H0](=[OX1H0])([OX2H1])[CX3H0] | 0.8201 |

---

Example 142 true smiles: CC=C(C)C(=O)O formula: C5H8O2  
 Index of correct structure: 0 of 329  
 True structure loss: 0.010051  
 True structure:

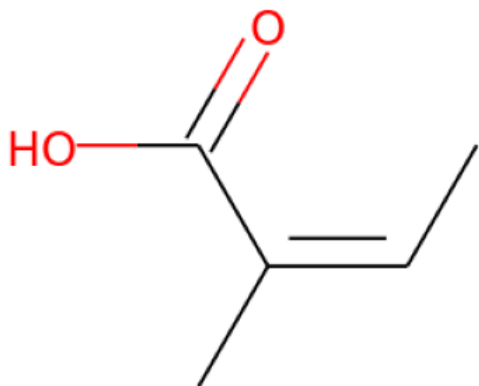

Experimental <sup>13</sup>C NMR (solvent: CDCl<sub>3</sub>)

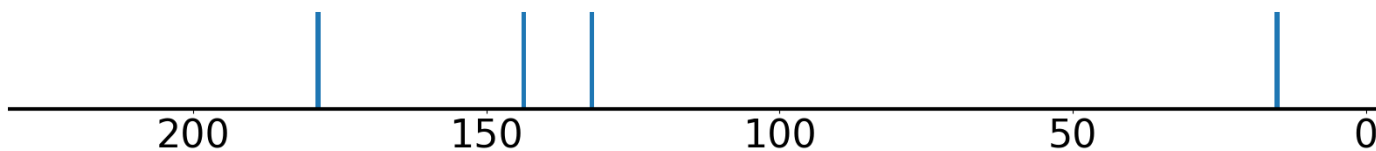

Experimental <sup>1</sup>H NMR (solvent: D<sub>2</sub>O)

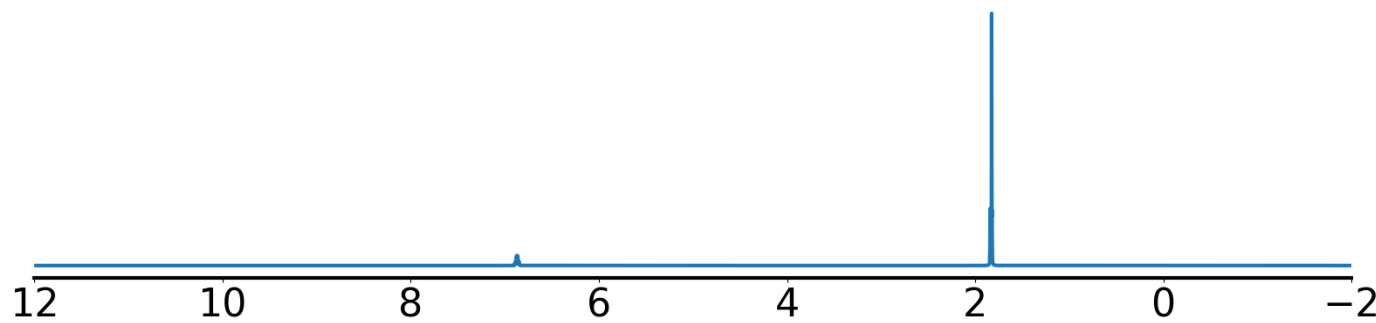

Top predicted structures (loss):

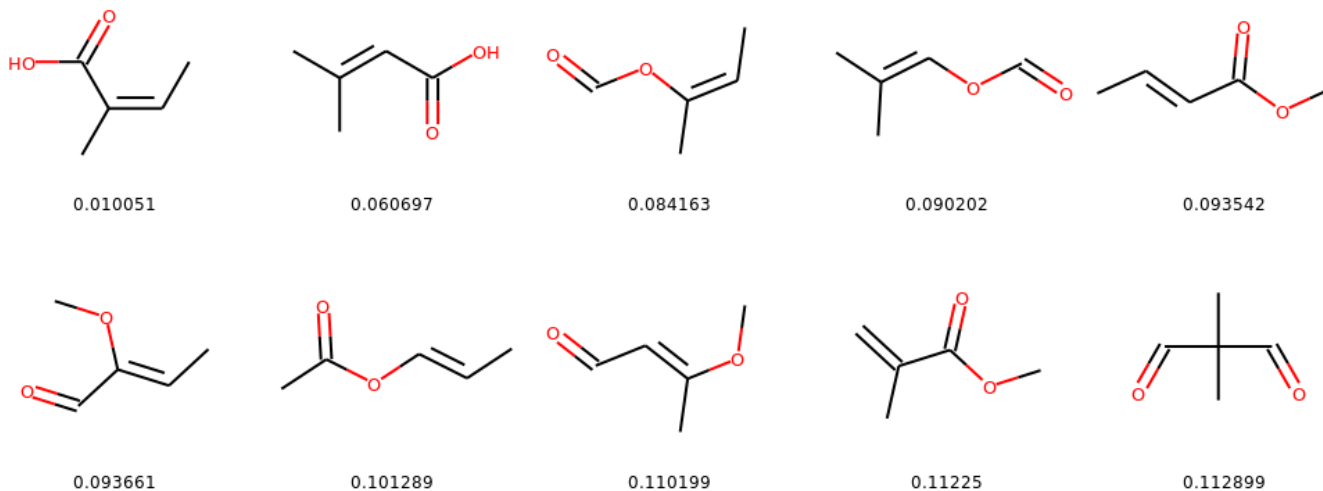

Top predicted substructures  
 [CX4H3]

prob  
 1.0

[#6X3][#6X3]

0.9855

|                                   |        |                                       |        |
|-----------------------------------|--------|---------------------------------------|--------|
| [CX4H3][CX3]                      | 0.9994 | [#8]=[#6][#8]                         | 0.9811 |
| [CX4H3][#6]                       | 0.9993 | [#6H3][#6]=[#6][#6H3]                 | 0.9632 |
| [CX3](=[OX1])C                    | 0.9878 | [#6H3][#6]=[#6X3]                     | 0.9621 |
| [#6H3][#6H0]                      | 0.9868 | [CX3](=O)[OX2H1]                      | 0.9621 |
| best positives                    | prob   | best negatives                        | prob   |
| [CX4H3]                           | 1.0    | [#6X2][#6H1][#6X2]                    | 0.0    |
| [CX4H3][CX3]                      | 0.9994 | [CX2H0](#[CX2H0])[CX2H0]              | 0.0    |
| [CX4H3][#6]                       | 0.9993 | [OX2H0]1[CX4H2][CX4H2][CX4H1][CX4H1]1 | 0.0    |
| [CX3](=[OX1])C                    | 0.9878 | [CX2H0](#[CX2H1])[CX4H2]              | 0.0    |
| [#6H3][#6H0]                      | 0.9868 | [CX2H0](#[CX2H1])[CX4H1]              | 0.0    |
| [#6X3][#6X3]                      | 0.9855 | [CX2H0](#[CX2H1])[CX2H0]              | 0.0    |
| [#8]=[#6][#8]                     | 0.9811 | [CX2H0](#[CX2H1])[CX4H0]              | 0.0    |
| [#6H3][#6]=[#6][#6H3]             | 0.9632 | [CX4H1]([CX4H1])([CX4H1])[CX4H0]      | 0.0    |
| [#6H3][#6]=[#6X3]                 | 0.9621 | [OX2H0][CX4H2][CX4H1]([CX4H1])[CX4H1] | 0.0    |
| [CX3](=O)[OX2H1]                  | 0.9621 | [CX4H2]([CX4H0])[CX2H0]               | 0.0    |
| worst negatives                   | prob   | worst positives                       | prob   |
| O=[#6][#6][#6X3]                  | 0.4539 | [CHX3](=C)C                           | 0.3154 |
| [#6X3H1][#6X3H0]                  | 0.2332 | [CH3]CC[OH]                           | 0.4226 |
| [#8][#6][#6][#6X3]                | 0.211  | [#6H1]                                | 0.4959 |
| [CX3H0](=[OX1H0])([OX2H1])[CX4H2] | 0.1473 | [#8][#6][#6]=[#6X3]                   | 0.5751 |
| [#8][#6H0][#6H1]                  | 0.1394 | [#6X3H1]=[#6X3H0]                     | 0.6785 |
| [#6X3][#6][#6][#6H3]              | 0.1384 | [#6X3][#6]=[#6][#6H3]                 | 0.6814 |
| [#8][#6][#6]=[#8]                 | 0.0977 | [CX3H0](=[OX1H0])([OX2H1])[CX3H0]     | 0.7244 |
| [#8][#6][#6]=[#6][#6]=[#8]        | 0.0905 | [#8][#6X3][#6X3]=[#6X3][#6H3]         | 0.7712 |
| [CX4H2]CC=O                       | 0.0869 | [CX4H3][CX3H1]                        | 0.7722 |
| [#8]=[#6H0][#6H1]                 | 0.0788 | [CX3H0](=[CX3H1])([CX4H3])[CX3H0]     | 0.8203 |

---

Example 143 true smiles: CCCCC(=O)O formula: C5H10O2  
 Index of correct structure: 0 of 303  
 True structure loss: 0.005996  
 True structure:

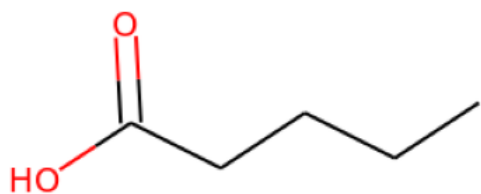

Experimental 13C NMR (solvent: CDCl3)

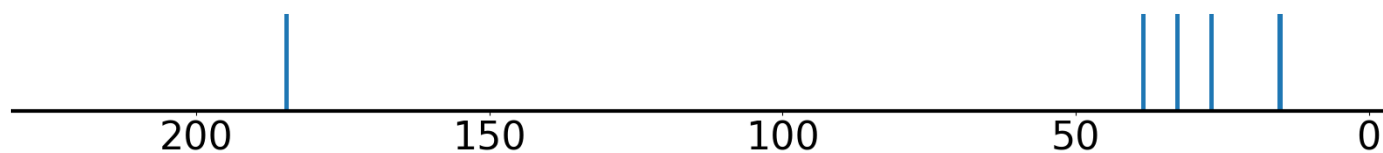

Experimental 1H NMR (solvent: D2O)

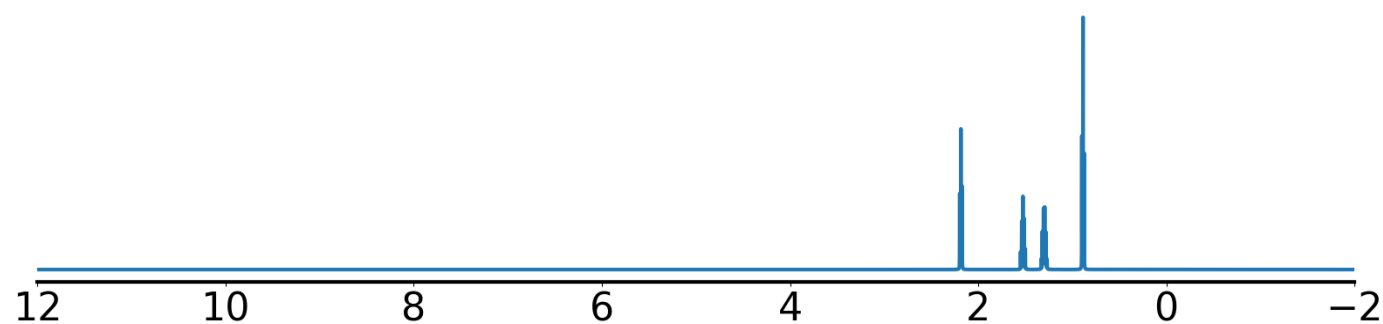

Top predicted structures (loss):

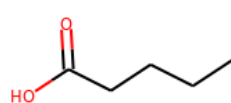

0.005996

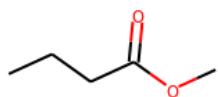

0.056613

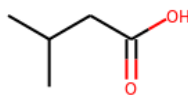

0.065769

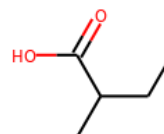

0.070666

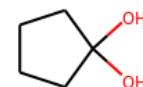

0.097018

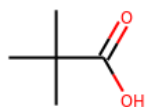

0.10027

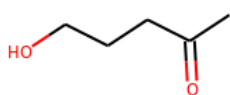

0.104816

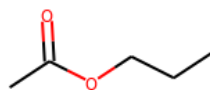

0.106557

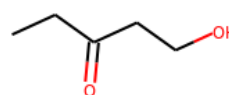

0.108538

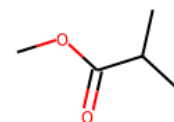

0.111279

Top predicted substructures  
 [CX4H2][[#6]][#6]

prob  
 0.9999

[CX4H3][[#6]

0.9967



|                                   |        |                                   |        |
|-----------------------------------|--------|-----------------------------------|--------|
| [#6H3][#6][#6]                    | 0.9994 | [#8]=[#6][#8]                     | 0.9963 |
| [CX3](=[OX1])C                    | 0.999  | [CX4H3]                           | 0.9944 |
| [CX3](=O)[OX2H1]                  | 0.9988 | [CX3](=[OX1])O                    | 0.9863 |
| [CX4H3][CX4H2]                    | 0.9983 | [OX2H1]                           | 0.9793 |
| best positives                    | prob   | best negatives                    | prob   |
| [CX4H2]([#6])[#6]                 | 0.9999 | C=CC=CC#C                         | 0.0    |
| [#6H3][#6][#6]                    | 0.9994 | CCC=CC#C                          | 0.0    |
| [CX3](=[OX1])C                    | 0.999  | [CX2H0](#[CX2H1])[cX3H0]          | 0.0    |
| [CX3](=O)[OX2H1]                  | 0.9988 | CCC#CC#C                          | 0.0    |
| [CX4H3][CX4H2]                    | 0.9983 | CC=CC#CC                          | 0.0    |
| [CX4H3][#6]                       | 0.9967 | CC=CCC#C                          | 0.0    |
| [#8]=[#6][#8]                     | 0.9963 | [CX2H0](#[CX2H1])[CX4H1]          | 0.0    |
| [CX4H3]                           | 0.9944 | [CX2H0](#[CX2H1])[CX3H1]          | 0.0    |
| [CX3](=[OX1])O                    | 0.9863 | [CX2H1]#[CX2H0][CX3H1]=[CX3H0]    | 0.0    |
| [OX2H1]                           | 0.9793 | [CX2H0](#[CX2H0])[CX2H0]          | 0.0    |
| worst negatives                   | prob   | worst positives                   | prob   |
| [CX4H2][CX4H2][CX4H2][CX4H2]      | 0.6204 | [#8][#6][#6H2]                    | 0.6338 |
| CCCCC                             | 0.4429 | [CX4H2][CX3]=O                    | 0.7568 |
| [CX3H0](=[OX1H0])([OX2H1])[CX4H1] | 0.2647 | [OX1H0]=[CX3H0]([#8])[CX4H2]      | 0.8257 |
| [#6H1][#6H2]                      | 0.2375 | [CX4H2]([CX4H2])[CX4H2]           | 0.8315 |
| [#6H1]                            | 0.236  | OCC[CH2]                          | 0.8508 |
| [#8]=[#6H0][#6H1]                 | 0.1819 | O=[CX3H0][CX4H2][CX4H2]           | 0.8863 |
| [#6X3][#6][#6][#6H3]              | 0.1805 | [CX3H0](=[OX1H0])([OX2H1])[CX4H2] | 0.9073 |
| [CH3]CC[OH]                       | 0.1211 | [CX4H2]CC=O                       | 0.9144 |
| [#8][#6H0][#6H1]                  | 0.0927 | [CX4H2](#[CX4H2])[CX3H0]          | 0.9252 |
| [#6H3][#6][#6X3]                  | 0.0594 | [CX4H2]([CX4H3])[CX4H2]           | 0.9437 |

---

Example 144 true smiles: O=C(O)C=CC(=O)O formula: C4H4O4  
 Index of correct structure: 0 of 301  
 True structure loss: 0.035775  
 True structure:

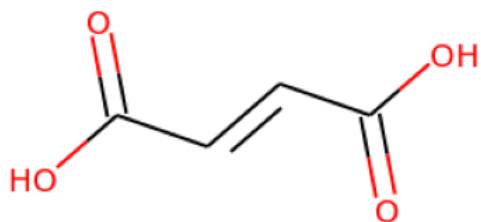

Experimental <sup>13</sup>C NMR (solvent: D2O)

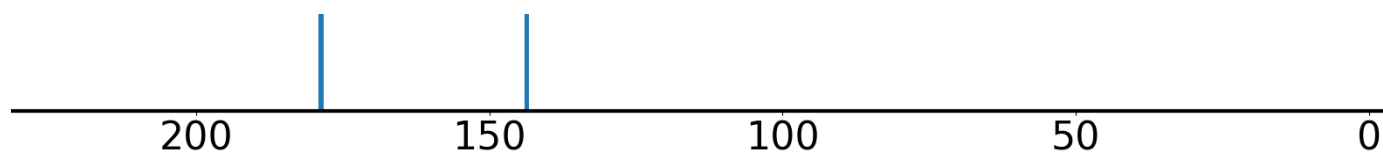

Experimental <sup>1</sup>H NMR (solvent: D2O)

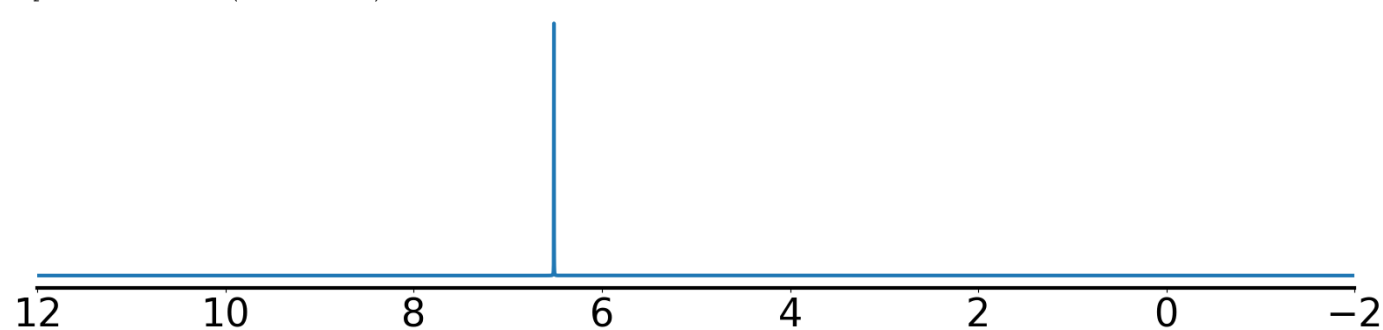

Top predicted structures (loss):

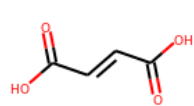

0.035775

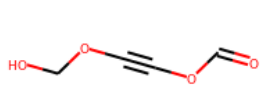

0.036655

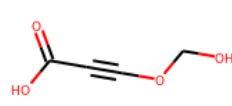

0.039464

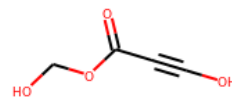

0.041437

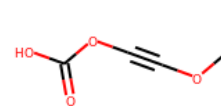

0.041872

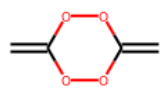

0.044606

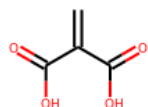

0.0447

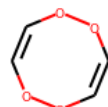

0.047843

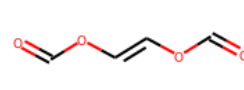

0.047968

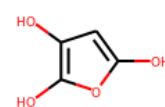

0.049387

Top predicted substructures  
 [#8]=[#6][#8]

prob  
 0.9905

[#6X3][#6X3]

0.8107

|                                   |        |                                           |        |
|-----------------------------------|--------|-------------------------------------------|--------|
| [CX3](=[OX1])O                    | 0.9796 | [OX2H1]                                   | 0.8064 |
| [CX3](=[OX1])C                    | 0.9322 | O=[#6][#6][#6X3]                          | 0.7505 |
| [#6H1]                            | 0.8799 | [#8][#6H0][#6H1]                          | 0.5214 |
| [CX3](=O)[OX2H1]                  | 0.8686 | [#6X3H1][#6X3H0]                          | 0.5068 |
| best positives                    |        |                                           |        |
| [#8][#6][#8]                      | prob   | best negatives                            | prob   |
| [CX3](=[OX1])O                    | 0.9905 | [OX2H0]1[CX4H2][CX4H2][CX4H1][CX4H1]1     | 0.0    |
| [CX3](=[OX1])C                    | 0.9796 | [OX2H0][CX4H2][CX4H1]([CX4H1])[CX4H1]     | 0.0    |
| [#6H1]                            | 0.9322 | [CX2H0](#[CX2H0])[CX2H0]                  | 0.0    |
| [CX3](=O)[OX2H1]                  | 0.8799 | [CX4H0]([NX3H1])([CX4H3])([CX4H2])[CX4H1] | 0.0    |
| [#6X3][#6X3]                      | 0.8686 | [CX4H1]([NX3H2])([CX4H2])[CX3H1]          | 0.0    |
| [OX2H1]                           | 0.8107 | [OX2H1][CX4H1]1[CX4H1][CX4H2][CX4H1]1     | 0.0    |
| [#8][#6H0][#6H1]                  | 0.8064 | [OX2H0][CX4H2][CX4H1]([CX4H1])[CX4H3]     | 0.0    |
| [#6X3H1][#6X3H0]                  | 0.5214 | [CX4H1]([OX2H1])([CX4H2])[CX2H0]          | 0.0    |
| O=[#6][#6][#6X3]                  | 0.5068 | [CX4H1]([CX4H2])([CX4H2])[CX2H0]          | 0.0    |
|                                   | 0.3217 | [OX2H0]1[CX4H1][CX4H2][CX4H1][CX4H2]1     | 0.0    |
| worst negatives                   |        |                                           |        |
| O=[#6][#6][#6X3]                  | prob   | worst positives                           | prob   |
| [#8][#6][#6][#8]                  | 0.7505 | [#6X3][#6X3]=[#6X3][#6X3]                 | 0.0732 |
| [#8][#6][#6][#6X3]                | 0.4565 | [OX1H0]=[CX3H0][CX3H1]=[CX3H1]            | 0.0765 |
| [#8][#6][#6][#6X3]                | 0.4461 | [CX3H1](=[CX3H1])[CX3H0]                  | 0.087  |
| [#8][#6][#6][#8]                  | 0.3344 | [#8][#6][#6]=[#6][#6][#8]                 | 0.1074 |
| [CX3H](O)                         | 0.2135 | [CX3H0][CX3H1]=[CX3H1][CX3H0]             | 0.1336 |
| [CX3H0](=[OX1H0])([OX2H1])[CX3H0] | 0.1982 | [CHX3]=[CHX3]                             | 0.1751 |
| [CX3H0](=[OX1H0])([OX2H1])[CX4H2] | 0.1759 | [#8]=[#6][#6H1]=[#6H1]                    | 0.1897 |
| O=CC=O                            | 0.1679 | [CHX3](=C)C                               | 0.1901 |
| [#8]=[#6][#6][#8]                 | 0.1621 | O=C[CX3H]                                 | 0.2013 |
| [cH]                              | 0.1419 | [#8][#6][#6]=[#6][#6]=[#8]                | 0.2066 |

---

Example 145 true smiles: O=C(O)C=CC(=O)O formula: C4H4O4  
 Index of correct structure: 4 of 301  
 True structure loss: 0.039178  
 True structure:

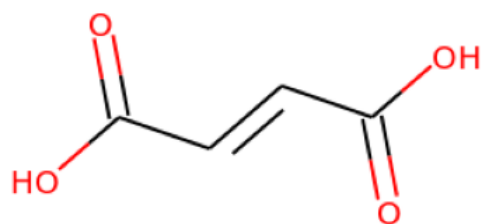

Experimental <sup>13</sup>C NMR (solvent: DMSO)

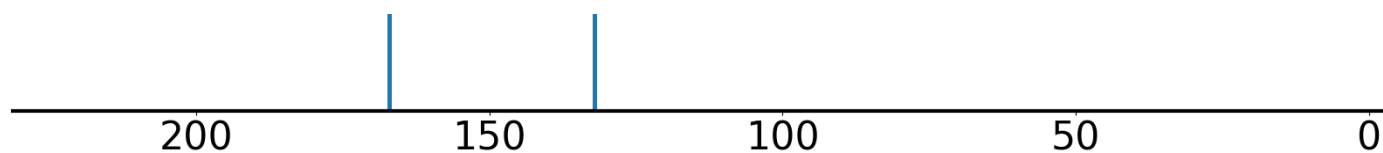

Experimental <sup>1</sup>H NMR (solvent: D2O)

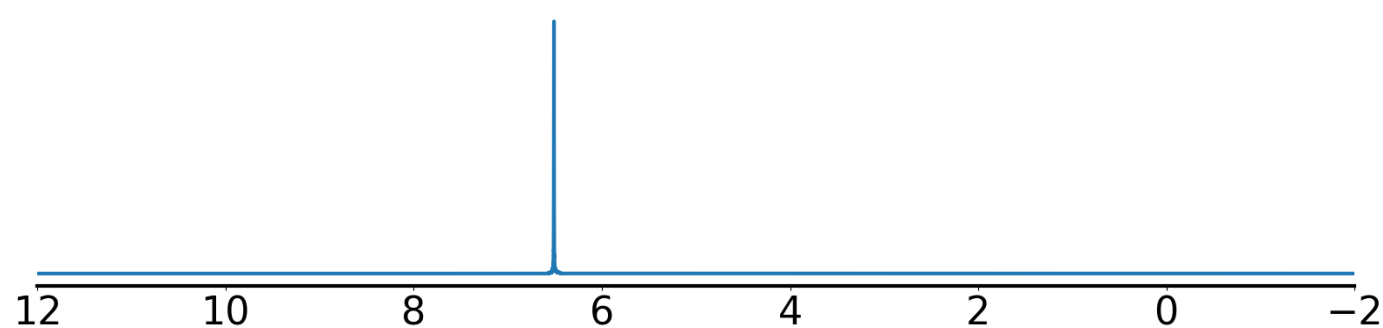

Top predicted structures (loss):

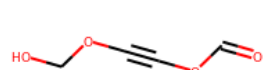

0.032792

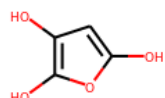

0.033734

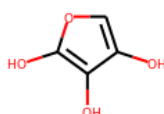

0.037724

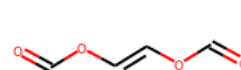

0.039167

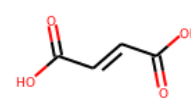

0.039178

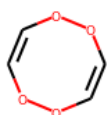

0.040963

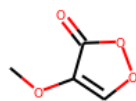

0.041943

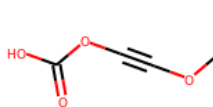

0.042753

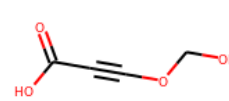

0.044155

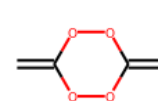

0.044979

Top predicted substructures  
 [#8]=[#6][#8]

prob  
 0.9843

[CX3](=O)[OX2H1]

0.7435

|                          |             |                                       |             |
|--------------------------|-------------|---------------------------------------|-------------|
| [#6H1]                   | 0.9612      | [#6X3H1][#6X3H0]                      | 0.707       |
| [CX3](=[OX1])O           | 0.9554      | [#8][#6H0][#6H1]                      | 0.6181      |
| [#6X3][#6X3]             | 0.9177      | O=[#6][#6][#6X3]                      | 0.5864      |
| [OX2H1]                  | 0.7641      | [CX3](=[OX1])C                        | 0.5682      |
| <b>best positives</b>    | <b>prob</b> | <b>best negatives</b>                 | <b>prob</b> |
| [#8][#6][#8]             | 0.9843      | CCC#CC#C                              | 0.0         |
| [#6H1]                   | 0.9612      | [OX2H0][CX4H2][CX4H1]([CX4H1])[CX4H1] | 0.0         |
| [CX3](=[OX1])O           | 0.9554      | [CX4H1]([NX3H1])([CX4H3])[CX4H2]      | 0.0         |
| [#6X3][#6X3]             | 0.9177      | [CX2H0](#[CX2H0])[CX2H0]              | 0.0         |
| [OX2H1]                  | 0.7641      | [CX4H1]([NX3H0])([CX4H2])[CX4H0]      | 0.0         |
| [CX3](=O)[OX2H1]         | 0.7435      | [OX2H0]1[CX4H2][CX4H2][CX4H1][CX4H1]1 | 0.0         |
| [#6X3H1][#6X3H0]         | 0.707       | [OX2H0][CX4H2][CX4H1]([CX4H1])[CX4H3] | 0.0         |
| [#8][#6H0][#6H1]         | 0.6181      | [CX4H1]([NX3H2])([CX4H2])[CX3H1]      | 0.0         |
| [CX3](=[OX1])C           | 0.5682      | [CX4H2]([CX4H1])[CX2H0]               | 0.0         |
| O=[#6][#6][#6X3]         | 0.4426      | [CX2H0](#[CX2H1])[CX2H0]              | 0.0         |
| <b>worst negatives</b>   | <b>prob</b> | <b>worst positives</b>                | <b>prob</b> |
| O=[#6][#6][#6X3]         | 0.5864      | [#6X3][#6X3]=[#6X3][#6X3]             | 0.0226      |
| [#8][#6][#6][#8]         | 0.4692      | [CX3H0][CX3H1]=[CX3H1][CX3H0]         | 0.0487      |
| [cH]                     | 0.4523      | [CHX3](=C)C                           | 0.076       |
| [OX2H][cX3]:[c]          | 0.3834      | [OX1H0]=[CX3H0][CX3H1]=[CX3H1]        | 0.0949      |
| [#8][#6][#6][#6X3]       | 0.3786      | [CX3H1](=[CX3H1])[CX3H0]              | 0.097       |
| [cH]cO                   | 0.3112      | [#8][#6][#6]=[#6][#6]=[#8]            | 0.1391      |
| O=[cX3]                  | 0.3085      | [#8][#6][#6]=[#6X3]                   | 0.1487      |
| [#6X3][#6X3][#6X3][#6X3] | 0.2756      | [#8]=[#6][#6H1]=[#6H1]                | 0.1814      |
| [CX3H](O)                | 0.2747      | [#8]=[#6][#6]=[#6][#6]=[#8]           | 0.1879      |
| [#8][#6][#6]=[#8]        | 0.2615      | O=C{CX3H}                             | 0.2223      |

---

Example 146 true smiles: O=C(O)C=CC(=O)O formula: C4H4O4  
 Index of correct structure: 0 of 301  
 True structure loss: 0.026882  
 True structure:



Experimental <sup>13</sup>C NMR (solvent: CD3OD)

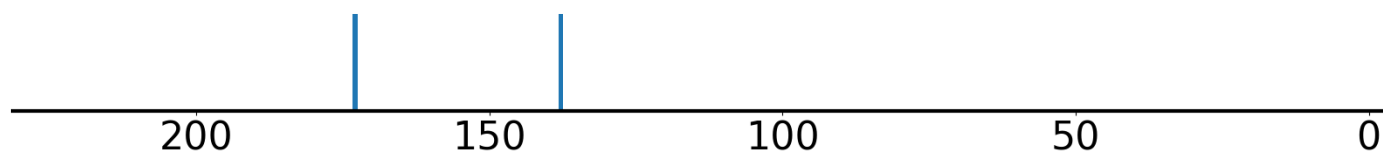

Experimental <sup>1</sup>H NMR (solvent: D2O)

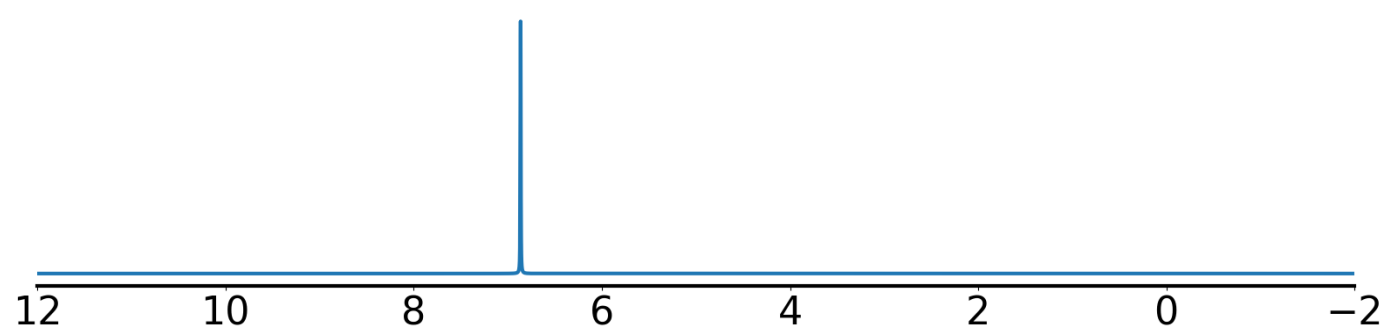

Top predicted structures (loss):

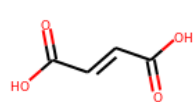

0.026882

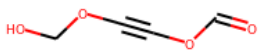

0.042347

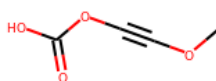

0.046889

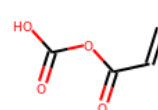

0.047066

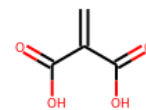

0.047417

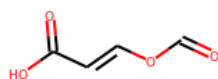

0.048399

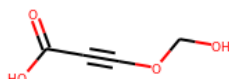

0.048745

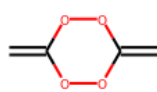

0.049289

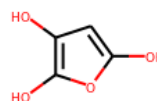

0.049371

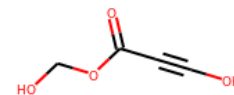

0.050939

Top predicted substructures  
 [#8]=[#6][#8]

prob  
 0.9941

[CX3](=O)[OX2H1]

0.8909

|                                  |        |                                           |        |
|----------------------------------|--------|-------------------------------------------|--------|
| [CX3](=[OX1])O                   | 0.9839 | [CX3](=[OX1])C                            | 0.8059 |
| [#6X3][#6X3]                     | 0.9369 | O=[#6][#6]=[#6X3]                         | 0.7132 |
| [#6H1]                           | 0.9104 | [#6X3H1][#6X3H0]                          | 0.7068 |
| [OX2H1]                          | 0.8964 | O=[#6][#6][#6X3]                          | 0.6379 |
| best positives                   | prob   | best negatives                            | prob   |
| [#8]=[#6][#8]                    | 0.9941 | CCC#CC#C                                  | 0.0    |
| [CX3](=[OX1])O                   | 0.9839 | [CX4H0]([NX3H1])([CX4H3])([CX4H2])[CX4H1] | 0.0    |
| [#6X3][#6X3]                     | 0.9369 | [#7][#6H1][#6X2]                          | 0.0    |
| [#6H1]                           | 0.9104 | [CX4H2]([CX4H3])[CX2H0]                   | 0.0    |
| [OX2H1]                          | 0.8964 | [CX4H1]([NX3H1])([CX4H3])[CX4H2]          | 0.0    |
| [CX3](=O)[OX2H1]                 | 0.8909 | [CX4H2]([NX3H0])[CX4H3]                   | 0.0    |
| [CX3](=[OX1])C                   | 0.8059 | CC#CCC#C                                  | 0.0    |
| O=[#6][#6]=[#6X3]                | 0.7132 | [CX4H1]([CX4H2])([CX4H1])[CX2H0]          | 0.0    |
| [#6X3H1][#6X3H0]                 | 0.7068 | [CX2H0](#[CX2H0])[CX2H0]                  | 0.0    |
| [#8][#6][#6]=[#6X3]              | 0.5765 | [CX2H0](#[CX2H1])[CX2H0]                  | 0.0    |
| worst negatives                  | prob   | worst positives                           | prob   |
| O=[#6][#6][#6X3]                 | 0.6379 | [#8][#6][#6]=[#6][#6][#8]                 | 0.1644 |
| [CX3H0]([OX1H0])([OX2H1])[CX3H0] | 0.6203 | [CX3H1]([CX3H1])[CX3H0]                   | 0.179  |
| [#8][#6][#6][#6X3]               | 0.3569 | [CX3H0][CX3H1]=[CX3H1][CX3H0]             | 0.184  |
| [cH]                             | 0.304  | [OX1H0]=[CX3H0][CX3H1]=[CX3H1]            | 0.2162 |
| [#8][#6][#6][#8]                 | 0.2699 | [CHX3]=[CHX3]                             | 0.2722 |
| [#8][#6][#6]=[#8]                | 0.26   | [#8]=[#6][#6H1]=[#6H1]                    | 0.2795 |
| [#6X3H1]=[#6X3H0]                | 0.2421 | [#8]=[#6H0][#6H1]                         | 0.281  |
| [cX3H1]([cX3H1])[cX3H0]          | 0.1815 | [#6X3][#6X3]=[#6X3][#6X3]                 | 0.2926 |
| [cH]cO                           | 0.1789 | [CHX3](=C)C                               | 0.3094 |
| [#6X3][#6X3][#6X3][#6X3]         | 0.1728 | O=C[CX3H]                                 | 0.3492 |

---

Example 147 true smiles: O=Cc1ccccc1 formula: C7H6O  
 Index of correct structure: 0 of 261  
 True structure loss: 0.010196  
 True structure:

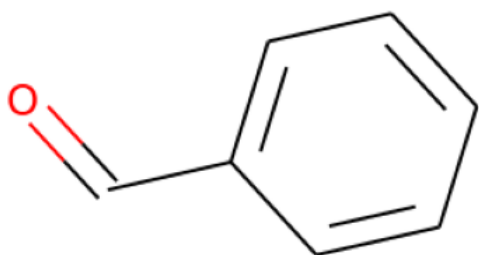

Experimental 13C NMR (solvent: CDCl3)

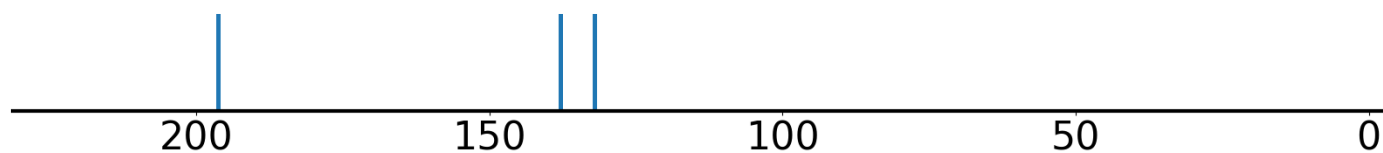

Experimental 1H NMR (solvent: D2O)

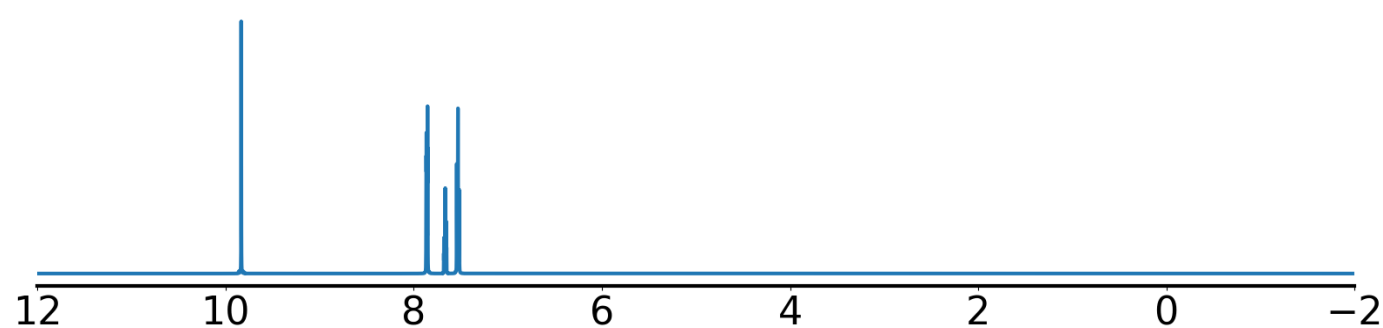

Top predicted structures (loss):

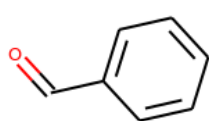

0.010196

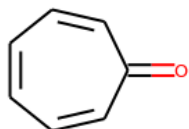

0.04115

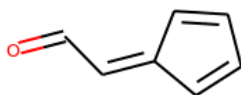

0.076293

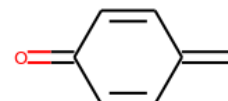

0.093436

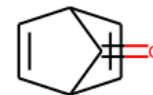

0.096076

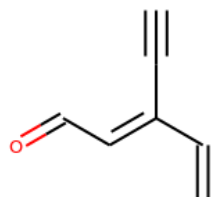

0.110224

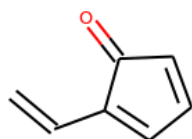

0.11064

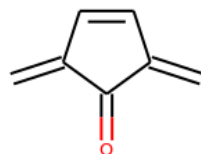

0.110902

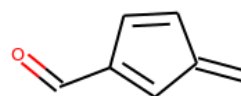

0.111885

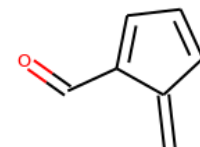

0.112736

Top predicted substructures  
 [#6H1]

prob  
 0.9998

[#6X3][#6X3][#6X3][#6X3]

0.9415



|                                   |        |                                           |        |
|-----------------------------------|--------|-------------------------------------------|--------|
| [#6X3][#6X3]                      | 0.9992 | [cH][cH]                                  | 0.8501 |
| [CX3H1](=O)[#6]                   | 0.9967 | O=[#6][#6][#6X3]                          | 0.8302 |
| [#6X3H1][#6X3H0]                  | 0.9905 | [cX3H1]([cX3H1])[cX3H1]                   | 0.827  |
| [#6H1][#6H1]                      | 0.9548 | [CX3](=[OX1])C                            | 0.8128 |
| best positives                    | prob   | best negatives                            | prob   |
| [#6H1]                            | 0.9998 | [#8][#6H1][#6H2][#6H1]=[#8]               | 0.0    |
| [#6X3][#6X3]                      | 0.9992 | [OX2H0]1[CX4H2][CX4H2][CX4H1][CX4H1]1     | 0.0    |
| [CX3H1](=O)[#6]                   | 0.9967 | [CX4H0]([OX2H1])([CX4H3])([CX4H2])[CX4H1] | 0.0    |
| [#6X3H1][#6X3H0]                  | 0.9905 | [CX4H1]([OX2H1])([CX4H2])[CX2H0]          | 0.0    |
| [#6H1][#6H1]                      | 0.9548 | [OX2H0][CX4H2][CX4H2][CX4H1][OX2H0]       | 0.0    |
| [#6X3][#6X3][#6X3][#6X3]          | 0.9415 | [CX4H0]([OX2H0])([CX4H3])([CX4H2])[CX4H1] | 0.0    |
| [cH][cH]                          | 0.8501 | [CX4H0]([NX3H1])([CX4H3])([CX4H2])[CX4H1] | 0.0    |
| O=[#6][#6][#6X3]                  | 0.8302 | [OX2H0][CX4H2][CX4H1]([CX4H1])[CX4H3]     | 0.0    |
| [cX3H1]([cX3H1])[cX3H1]           | 0.827  | [OX2H0]1[CX4H2][CX4H1][CX4H1]1            | 0.0    |
| [cH]                              | 0.8049 | [OX2H0][CX4H2][CX4H0][OX2H0]              | 0.0    |
| worst negatives                   | prob   | worst positives                           | prob   |
| [CX3](=[OX1])C                    | 0.8128 | [#6]1[#6][#6][#6][#6]1                    | 0.5652 |
| O=C[CX3H]                         | 0.4753 | [#8]=[#6H][#6X3][#6X3H]                   | 0.6042 |
| [#6X3][#6X3]=[#6X3][#6X3]         | 0.3759 | [cX3H1]([cX3H1])[cX3H0]                   | 0.6778 |
| [CHX3]=[CHX3]                     | 0.3655 | [#6X3H1][#6X3H1][#6X3H0][#6X3H1]          | 0.8039 |
| [#6X3H1]=[#6X3H1][#6X3H0][#6X3H1] | 0.2878 | [cH]                                      | 0.8049 |
| [#8]=[#6H][#6X3]=[#6X3H]          | 0.2832 | [cX3H1]([cX3H1])[cX3H1]                   | 0.827  |
| O=[#6][#6]=[#6X3]                 | 0.2744 | O=[#6][#6][#6X3]                          | 0.8302 |
| [#6X3][#6X3][#6X3]=[#6X3]         | 0.2684 | [cH][cH]                                  | 0.8501 |
| [#8]=[#6][#6]=[#6][#6]=[#8]       | 0.2366 | [#6X3][#6X3][#6X3][#6X3]                  | 0.9415 |
| [#8]=[#6H0][#6H1]                 | 0.2219 | [#6H1][#6H1]                              | 0.9548 |

---

Example 148 true smiles: Nc1ccccc1 formula: C6H7N  
 Index of correct structure: 0 of 245  
 True structure loss: 0.008435  
 True structure:

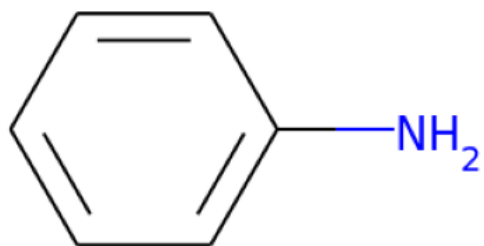

Experimental <sup>13</sup>C NMR (solvent: CDCl<sub>3</sub>)

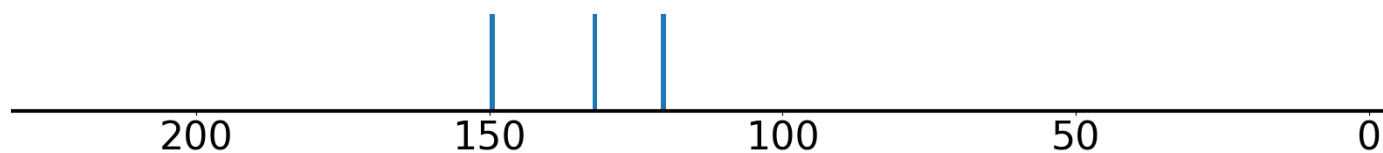

Experimental <sup>1</sup>H NMR (solvent: CDCl<sub>3</sub>)

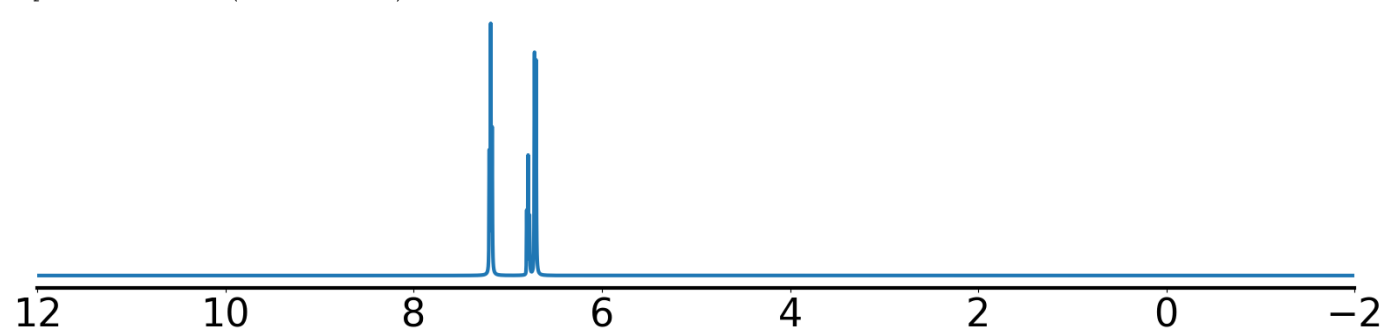

Top predicted structures (loss):

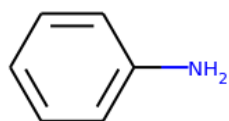

0.008435

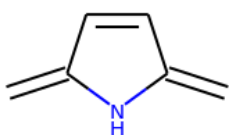

0.038484

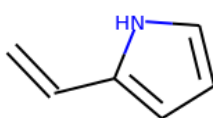

0.049658

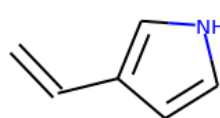

0.054101

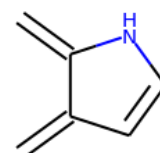

0.056782

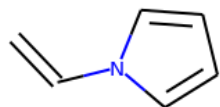

0.057884

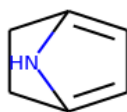

0.063464

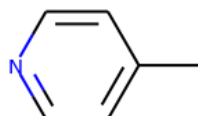

0.08006

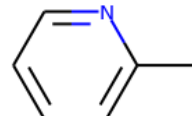

0.086147

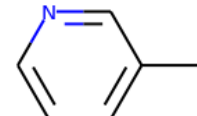

0.090158

Top predicted substructures  
 [#6H1]

prob  
 0.9989

[cH]

0.9652

|                              |        |                                           |        |
|------------------------------|--------|-------------------------------------------|--------|
| [#6X3][#6X3]                 | 0.9979 | [#7][#6][#6X3]                            | 0.9612 |
| [cH][cH]                     | 0.9964 | [cX3H1]([cX3H1])[cX3H0]                   | 0.955  |
| [#6X3][#6X3][#6X3][#6X3]     | 0.9879 | [#6]1[#6][#6][#6][#6][#6]1                | 0.9426 |
| [cX3H1]([cX3H1])[cX3H1]      | 0.9798 | [#6H1][#6H1]                              | 0.9209 |
| best positives               | prob   | best negatives                            | prob   |
| [#6H1]                       | 0.9989 | [OX2H0]1[CX4H2][CX4H2][CX4H1][CX4H1]1     | 0.0    |
| [#6X3][#6X3]                 | 0.9979 | [OX2H0][CX4H2][CX4H2][CX4H1][OX2H0]       | 0.0    |
| [cH][cH]                     | 0.9964 | [#8][#6H1][#6H2][#6H1]=[#8]               | 0.0    |
| [#6X3][#6X3][#6X3][#6X3]     | 0.9879 | [OX2H0]1[CX4H2][CX4H1][CX4H1]1            | 0.0    |
| [cX3H1]([cX3H1])[cX3H1]      | 0.9798 | [OX1H0]=[CX3H0]1[CX4H1][CX4H1][CX4H2]1    | 0.0    |
| [cH]                         | 0.9652 | [CX4H0]([NX3H1])([CX4H3])([CX4H2])[CX4H1] | 0.0    |
| [#7][#6][#6X3]               | 0.9612 | [OX2H0][CX4H2][CX4H1]([CX4H1])[CX4H3]     | 0.0    |
| [cX3H1]([cX3H1])[cX3H0]      | 0.955  | [CX4H1]([OX2H1])([CX4H2])[CX2H0]          | 0.0    |
| [#6]1[#6][#6][#6][#6][#6]1   | 0.9426 | [CX4H0]([OX2H1])([CX4H3])([CX4H2])[CX4H1] | 0.0    |
| [#6H1][#6H1]                 | 0.9209 | [OX2H1][CX4H1][CX4H1]([CX4H1])[CX4H1]     | 0.0    |
| worst negatives              | prob   | worst positives                           | prob   |
| [#6X3][#7][#6X3]             | 0.4874 | [#7H2][#6H0]                              | 0.4249 |
| [#6]1[#6][#6][#6][#6][#6]1   | 0.4765 | [#7][#6H0][#6H1]                          | 0.5986 |
| [#7X3H1]                     | 0.3176 | [#7][#6X3H0][#6X3H1]                      | 0.66   |
| [#7H][#6X3H1]                | 0.2547 | [#7X3H2]                                  | 0.6981 |
| [#6]1[#6][#6][#6][#6]1       | 0.2382 | [#6X3H1][#6X3H1][#6X3H0][#6X3H1]          | 0.753  |
| [#6H1][#7][#6H1]             | 0.2292 | [#7][#6][#6][#6X3]                        | 0.9116 |
| [cH]cO                       | 0.2147 | [#6X3H1][#6X3H0]                          | 0.9163 |
| [cX3H1]([NX3H1])[cX3H1]      | 0.2034 | [#6H1][#6H1]                              | 0.9209 |
| [#6X3][#7X3][#6X3]           | 0.18   | [#6]1[#6][#6][#6][#6]1                    | 0.9426 |
| [cX3H0][cX3H1][cX3H1][cX3H0] | 0.1547 | [cX3H1]([cX3H1])[cX3H0]                   | 0.955  |

---

Example 149 true smiles: CC(CO)(CO)CO formula: C5H12O3  
 Index of correct structure: 0 of 238  
 True structure loss: 0.024948  
 True structure:

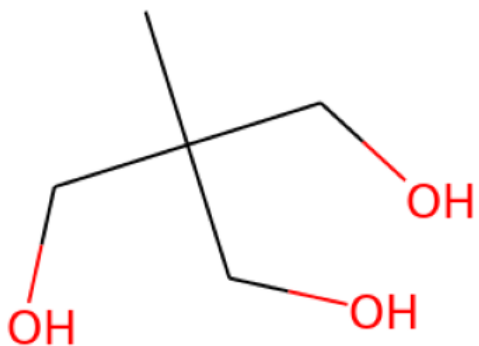

Experimental 13C NMR (solvent: D2O)

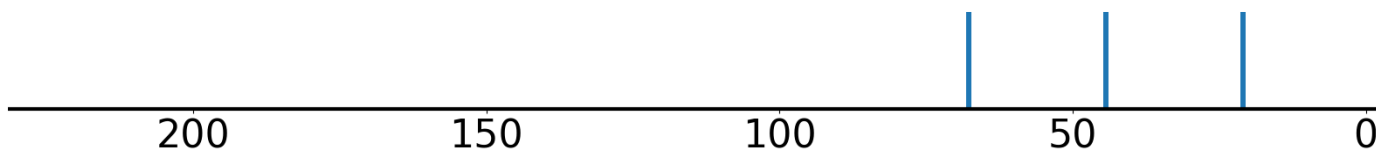

Experimental 1H NMR (solvent: CDCl3)

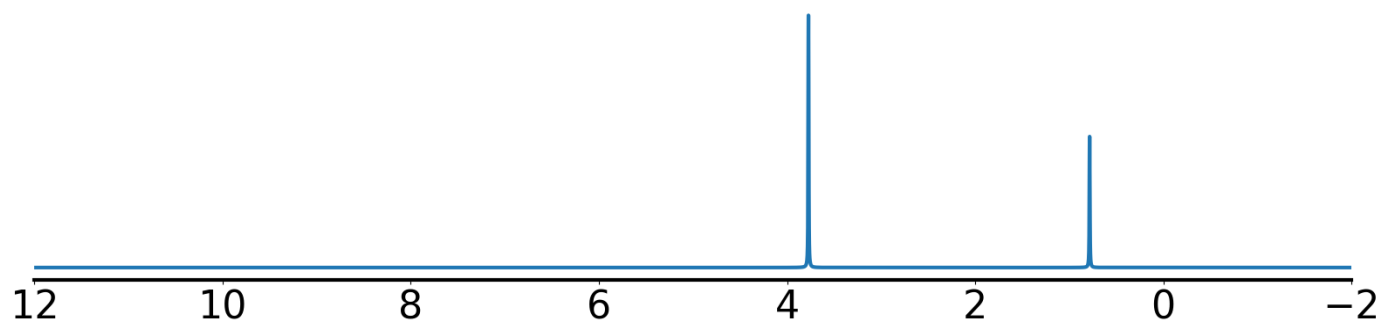

Top predicted structures (loss):

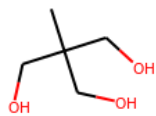

0.024948

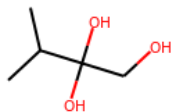

0.029405

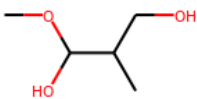

0.033083

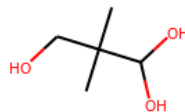

0.034161

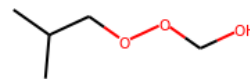

0.034384

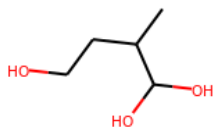

0.039017

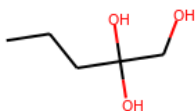

0.039642

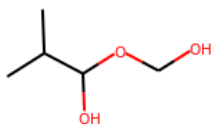

0.040188

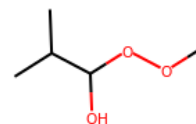

0.040273

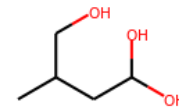

0.041288

Top predicted substructures  
 [OX2H1]

prob  
 0.9999

[OH][CX4H]

0.8238

|                                           |        |                                           |        |
|-------------------------------------------|--------|-------------------------------------------|--------|
| [#6H3][#6][#6]                            | 0.9948 | [CH3]CC[OH]                               | 0.7833 |
| [CX4H3][#6]                               | 0.9799 | OCC[CH2]                                  | 0.7512 |
| [CX4H3]                                   | 0.9762 | [#6H1]                                    | 0.7329 |
| [CX4H2]([#6])[O]                          | 0.9332 | [#8][#6][#6H2]                            | 0.7134 |
| best positives                            | prob   | best negatives                            | prob   |
| [OX2H1]                                   | 0.9999 | [CX2H1]#[CX2H0][CX3H1]=[CX3H0]            | 0.0    |
| [#6H3][#6][#6]                            | 0.9948 | C=CCCC#C                                  | 0.0    |
| [CX4H3][#6]                               | 0.9799 | C=CC=CC#C                                 | 0.0    |
| [CX4H3]                                   | 0.9762 | CCC=CC#C                                  | 0.0    |
| [CX4H2]([#6])[O]                          | 0.9332 | [CX2H0]([#CX2H1])[cX3H0]                  | 0.0    |
| [CH3]CC[OH]                               | 0.7833 | CC#CCC=C                                  | 0.0    |
| OCC[CH2]                                  | 0.7512 | [CX3H0](=[CX3H1])([CX4H2])[CX2H0]         | 0.0    |
| [CX4H2]([OX2H1])[CX4H0]                   | 0.683  | CC=CCC#C                                  | 0.0    |
| [#8][#6H2][#6H0][#6H2][#8]                | 0.4732 | CC=CC#CC                                  | 0.0    |
| [CX4H0]([CX4H3])([CX4H2])([CX4H2])[CX4H2] | 0.2748 | [CX3H0](=[CX3H1])([CX4H1])[CX2H0]         | 0.0    |
| worst negatives                           | prob   | worst positives                           | prob   |
| [OH][CX4H]                                | 0.8238 | [#6H3][#6H0]([#6H2])([#6H2])              | 0.1137 |
| [#6H1]                                    | 0.7329 | [#6H3][#6H0]                              | 0.1245 |
| [#8][#6][#6H2]                            | 0.7134 | [CX4H3][CX4H0]                            | 0.1733 |
| [CX4H3][CX4H1]                            | 0.6912 | [CX4H0]([CX4H3])([CX4H2])([CX4H2])[CX4H2] | 0.2748 |
| [#8][#6][#6][#8]                          | 0.4994 | [#8][#6H2][#6H0][#6H2][#8]                | 0.4732 |
| [#8H][#6H2][#6H1]                         | 0.4967 | [CX4H2]([OX2H1])[CX4H0]                   | 0.683  |
| C1CC1                                     | 0.4629 | OCC[CH2]                                  | 0.7512 |
| [#6H1][#6H2]                              | 0.4514 | [CH3]CC[OH]                               | 0.7833 |
| [CX4H2]([OX2H1])[CX4H1]                   | 0.4394 | [CX4H2]([#6])[O]                          | 0.9332 |
| [CX4H2](O)[CHX4]                          | 0.4109 | [CX4H3]                                   | 0.9762 |

---

Example 150 true smiles: OCc1ccco1 formula: C5H6O2  
 Index of correct structure: 0 of 226  
 True structure loss: 0.023588  
 True structure:

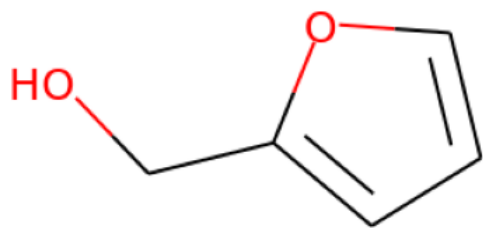

Experimental <sup>13</sup>C NMR (solvent: CDCl<sub>3</sub>)

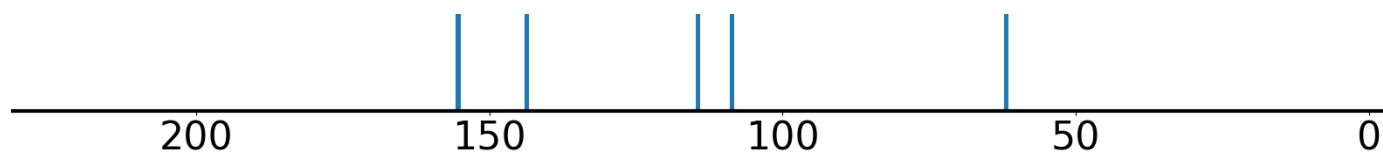

Experimental <sup>1</sup>H NMR (solvent: CDCl<sub>3</sub>)

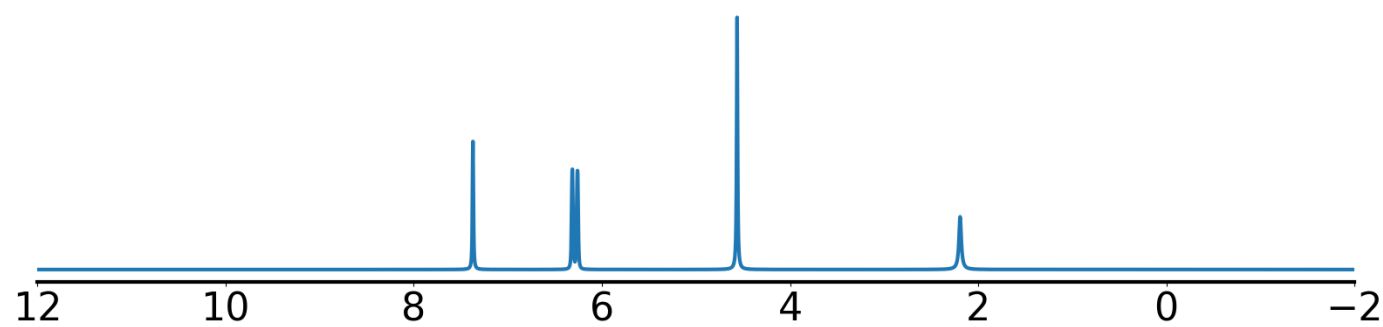

Top predicted structures (loss):

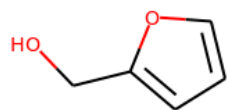

0.023588

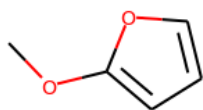

0.046056

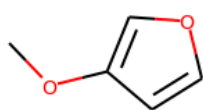

0.05039

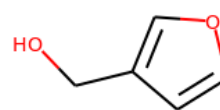

0.05365

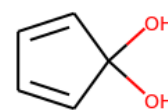

0.062621

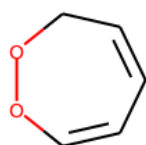

0.069503

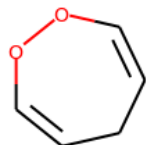

0.073489

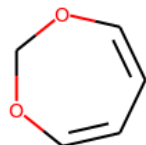

0.082126

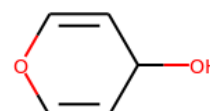

0.09083

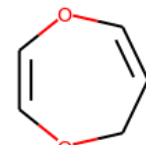

0.091386

Top predicted substructures  
 [#6H1]

prob  
 0.9999

[#6X3H1][#6X3H0]

0.8704

|                          |        |                                           |        |
|--------------------------|--------|-------------------------------------------|--------|
| [#6X3][#6X3]             | 0.9911 | [CX4H2]([#6])[O]                          | 0.8523 |
| [#6H1][#6H1]             | 0.9161 | [#6X3][#6H2][#8]                          | 0.8345 |
| [#8][#6][#6][#6X3]       | 0.9149 | [cH][cH]                                  | 0.8209 |
| [OX2H1]                  | 0.9142 | [cX3H1]([cX3H1])[cX3H1]                   | 0.7764 |
| best positives           | prob   | best negatives                            | prob   |
| [#6H1]                   | 0.9999 | [CX2H0](#[CX2H1])[CX4H0]                  | 0.0    |
| [#6X3][#6X3]             | 0.9911 | [CX4H0]([CX4H2]([CX4H2]([CX4H1])[CX4H1])) | 0.0    |
| [#6H1][#6H1]             | 0.9161 | [CX4H0]([NX3H1]([CX4H3]([CX4H2])[CX4H1])) | 0.0    |
| [#8][#6][#6][#6X3]       | 0.9149 | [CX4H2]([NX3H1])[CX2H0]                   | 0.0    |
| [OX2H1]                  | 0.9142 | [CX4H2]([NX3H0])[CX4H3]                   | 0.0    |
| [#6X3H1][#6X3H0]         | 0.8704 | [CX4H0]([NX3H1]([CX4H2]([CX4H2])[CX4H1])) | 0.0    |
| [CX4H2]([#6])[O]         | 0.8523 | CC#CCC#C                                  | 0.0    |
| [#6X3][#6H2][#8]         | 0.8345 | [CX3H0](=[OX1H0]([CX4H3])[CX4H0])         | 0.0    |
| [cH][cH]                 | 0.8209 | [CX4H2]([CX4H3])[CX2H0]                   | 0.0    |
| [cX3H1]([cX3H1])[cX3H1]  | 0.7764 | [CX3H0](=[CX3H2]([CX4H3])[CX4H0])         | 0.0    |
| worst negatives          | prob   | worst positives                           | prob   |
| [CHX3](=C)C              | 0.7159 | [CX4H2]([OX2H1])[cX3H0]                   | 0.0949 |
| [CHX3]=[CHX3]            | 0.438  | [#8][#6][#6H2][#8]                        | 0.1477 |
| [#6H1][#6H2]             | 0.4271 | [OX2H1][CX4H2][#6X3H0]                    | 0.1822 |
| [#8][#6][#6]=[#6X3]      | 0.3879 | o[cH]                                     | 0.3261 |
| [CX4H2][CX3]=C           | 0.3824 | [#8][#6][#6][#8]                          | 0.3543 |
| [CX3H1](=[CX3H1])[OX2H0] | 0.3152 | [#8][#6H][#6X3][#6X3H]                    | 0.4084 |
| [CX3H](O)                | 0.292  | [OX2H1][CX4H2][#6X3H0][#8X2H0]            | 0.4557 |
| [O][CX3H1]=[CX3H1]       | 0.2425 | [#8][#6H0][#6H1]                          | 0.4871 |
| [CX4H]O                  | 0.2304 | [#8][#6][#6H2]                            | 0.5545 |
| [CX4H2][CX3H]            | 0.2241 | [#6X3][#6X3][#6X3][#6X3]                  | 0.5709 |

---

Example 151 true smiles: OCc1ccco1 formula: C5H6O2  
 Index of correct structure: 0 of 226  
 True structure loss: 0.017968  
 True structure:

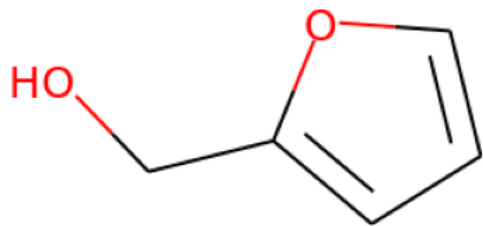

Experimental <sup>13</sup>C NMR (solvent: CDCl<sub>3</sub>)

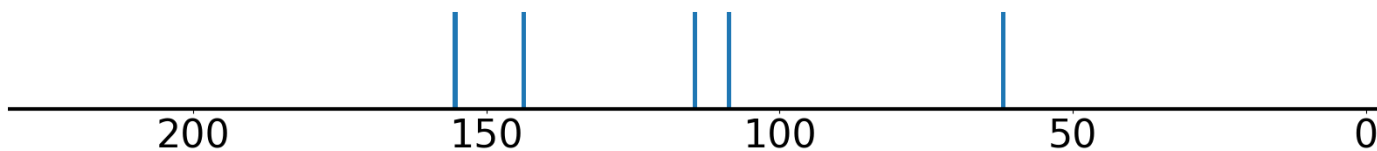

Experimental <sup>1</sup>H NMR (solvent: CD<sub>3</sub>OD)

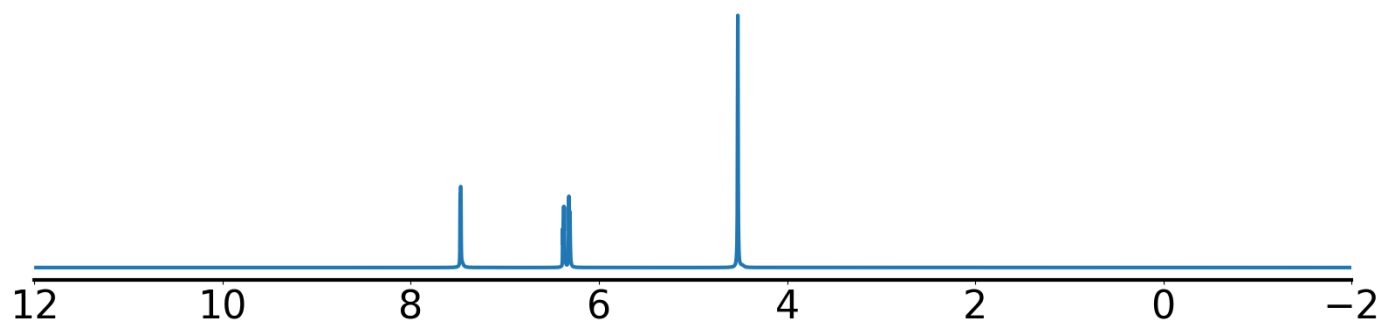

Top predicted structures (loss):

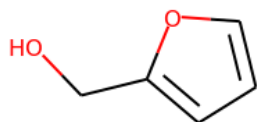

0.017968

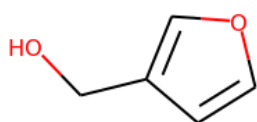

0.049957

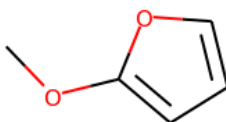

0.054671

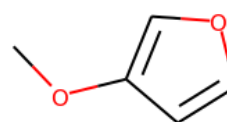

0.060977

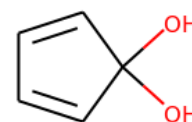

0.077338

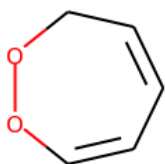

0.081317

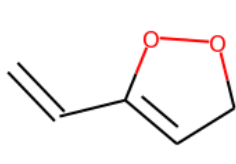

0.094199

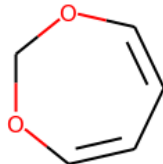

0.101299

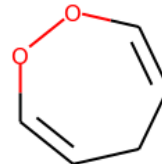

0.102284

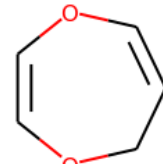

0.102669

Top predicted substructures  
 [#6H1]

prob  
 0.9995

[#6X3][#6H2][#8]

0.9504



|                             |        |                                               |        |
|-----------------------------|--------|-----------------------------------------------|--------|
| [CX4H2]([#6])[O]            | 0.9965 | [#6X3H1] [#6X3H0]                             | 0.9473 |
| [#6X3] [#6X3]               | 0.9931 | [#8] [#6] [#6] [#6X3]                         | 0.9254 |
| [OX2H1] [CX4H2] [#6X3H0]    | 0.9632 | [cH] [cH]                                     | 0.9207 |
| [OX2H1]                     | 0.9605 | [#6X3] [#6X3] [#6X3] [#6X3]                   | 0.8966 |
| best positives              | prob   | best negatives                                | prob   |
| [#6H1]                      | 0.9995 | [CX2H0] (#[CX2H1]) [CX4H0]                    | 0.0    |
| [CX4H2] ([#6]) [O]          | 0.9965 | [CX4H0] ([CX4H2]) ([CX4H2]) ([CX4H1]) [CX4H1] | 0.0    |
| [#6X3] [#6X3]               | 0.9931 | [CX4H0] ([NX3H1]) ([CX4H2]) ([CX4H2]) [CX4H1] | 0.0    |
| [OX2H1] [CX4H2] [#6X3H0]    | 0.9632 | [CX4H0] ([NX3H1]) ([CX4H3]) ([CX4H2]) [CX4H1] | 0.0    |
| [OX2H1]                     | 0.9605 | [OX1H0] = [CX3H0] 1 [CX4H1] [CX4H1] [CX4H2] 1 | 0.0    |
| [#6X3] [#6H2] [#8]          | 0.9504 | CCC#CC#C                                      | 0.0    |
| [#6X3H1] [#6X3H0]           | 0.9473 | [OX2H0] 1 [CX4H2] [CX4H2] [CX4H1] [CX4H1] 1   | 0.0    |
| [#8] [#6] [#6] [#6X3]       | 0.9254 | [CX4H2] ([CX4H3]) [CX2H0]                     | 0.0    |
| [cH] [cH]                   | 0.9207 | [CX4H1] ([CX4H3]) ([CX4H2]) [CX4H0]           | 0.0    |
| [#6X3] [#6X3] [#6X3] [#6X3] | 0.8966 | [CX4H1] ([NX3H0]) ([CX4H3]) [CX4H1]           | 0.0    |
| worst negatives             | prob   | worst positives                               | prob   |
| [#8] [#6] [#6] = [#6X3]     | 0.6777 | [#8] [#6H] [#6X3] [#6X3H]                     | 0.2424 |
| [#8H] [#6H2] [#6H1]         | 0.524  | [#8] [#6] [#6H2]                              | 0.2536 |
| [CHX3] (=C) C               | 0.4629 | [#8] [#6H1] [#6H1]                            | 0.321  |
| [CX4H2] [CX3] =C            | 0.3372 | o [cH]                                        | 0.3668 |
| O [CX4H2] [CX3H1]           | 0.3193 | [#8] [#6] [#6] [#8]                           | 0.3999 |
| [#6H1] [#6H2]               | 0.2514 | [#8] [#6H0] [#6H1]                            | 0.4312 |
| [CHX3] = [CHX3]             | 0.2479 | [#8] [#6] [#6H2] [#8]                         | 0.4949 |
| [CX4H2] [CX3H]              | 0.2123 | [cX3H1] ([oX2H0]) [cX3H1]                     | 0.6041 |
| [#6X3H1] = [#6X3H0]         | 0.2021 | [CX4H2] ([OX2H1]) [cX3H0]                     | 0.7003 |
| [CX3H1] (= [CX3H1]) [OX2H0] | 0.1898 | [cX3H1] ([cX3H1]) [cX3H1]                     | 0.7882 |

---

Example 152 true smiles: CC(N)C(=O)O formula: C3H7NO2  
 Index of correct structure: 0 of 207  
 True structure loss: 0.011071  
 True structure:

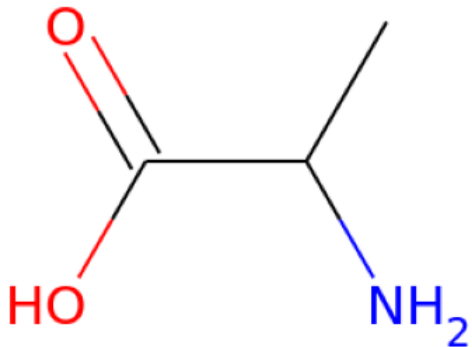

Experimental <sup>13</sup>C NMR (solvent: D2O)

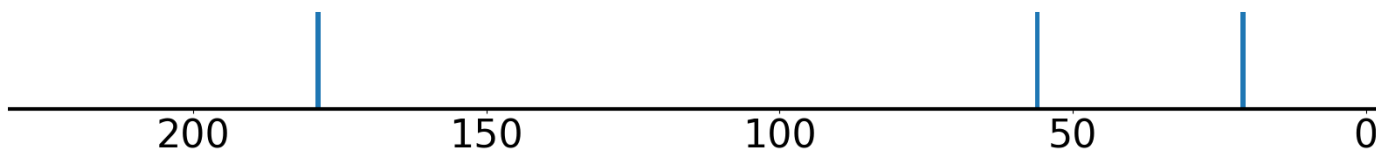

Experimental <sup>1</sup>H NMR (solvent: D2O)

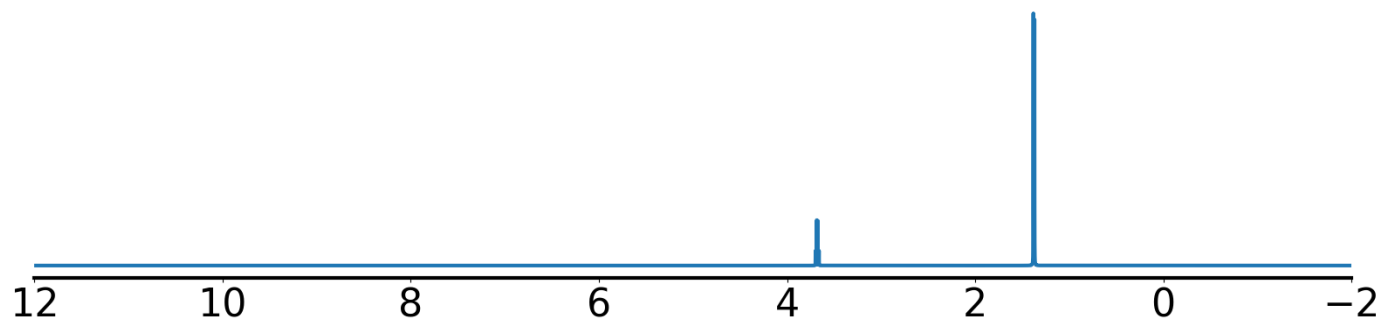

Top predicted structures (loss):

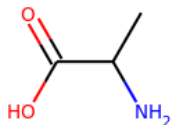

0.011071

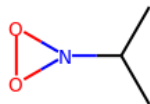

0.036461

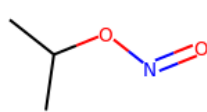

0.052779

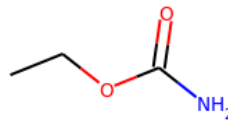

0.054028

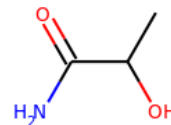

0.056523

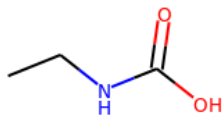

0.057483

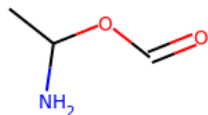

0.057575

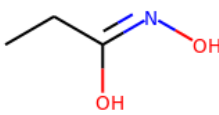

0.061684

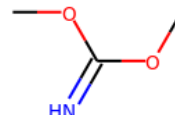

0.064723

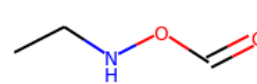

0.067168

Top predicted substructures  
 [CX4H3]

prob  
 0.9996

[CX4H3][CX4H1]

0.9063

|                      |        |                                   |        |
|----------------------|--------|-----------------------------------|--------|
| [CX4H3][#6]          | 0.9967 | O=[CX3][CX4H]                     | 0.8844 |
| [#6H3][#6][#6]       | 0.9886 | [#7][#6][#6H3]                    | 0.8753 |
| [CX3](=[OX1])C       | 0.9771 | [CX3](=[OX1])O                    | 0.8642 |
| [#8]=[#6][#8]        | 0.9273 | [#7][#6][#6X3]                    | 0.8558 |
| best positives       | prob   | best negatives                    | prob   |
| [CX4H3]              | 0.9996 | [CX3H0](=[CX3H1])([CX4H2])[CX2H0] | 0.0    |
| [CX4H3][#6]          | 0.9967 | C=CCCC#C                          | 0.0    |
| [#6H3][#6][#6]       | 0.9886 | CC=CC#CC                          | 0.0    |
| [CX3](=[OX1])C       | 0.9771 | C=CC=CC#C                         | 0.0    |
| [#8]=[#6][#8]        | 0.9273 | CC=CCC#C                          | 0.0    |
| [CX4H3][CX4H1]       | 0.9063 | [CX2H0](#[CX2H1])[cX3H0]          | 0.0    |
| O=[CX3][CX4H]        | 0.8844 | CCC#CC#C                          | 0.0    |
| [#7][#6][#6H3]       | 0.8753 | [CX2H1]#[CX2H0][CX3H1]=[CX3H0]    | 0.0    |
| [CX3](=[OX1])O       | 0.8642 | CC#CCC=C                          | 0.0    |
| [#7][#6][#6X3]       | 0.8558 | CCC#CC=C                          | 0.0    |
| worst negatives      | prob   | worst positives                   | prob   |
| [#7H2][#6H0]         | 0.3668 | [CH3]CC[OH]                       | 0.1118 |
| [#7][#6H0][#6H1]     | 0.2932 | [#8][#6H0][#6H1]                  | 0.4938 |
| [#7X3H1]             | 0.2653 | [#7H2][#6H1]                      | 0.5558 |
| [CX4H3][CX4]O        | 0.2616 | [CX3H0](=[OX1H0])([OX2H1])[CX4H1] | 0.6897 |
| [CX4H]O              | 0.2026 | [OX2H1]                           | 0.7058 |
| [CH3][#6][#8]        | 0.1987 | [#7X3H2]                          | 0.7436 |
| [#8][#6][#6][#6X3]   | 0.1209 | [#6H1]                            | 0.7454 |
| [CX4H2][CX3]=O       | 0.11   | [#6H3][#6][#6X3]                  | 0.7826 |
| [#6X3][#6][#6][#6H3] | 0.1009 | [#7H2][#6X4H1][#6X3]              | 0.8132 |
| [OH][CX4H]           | 0.0873 | [CX3](=O)[OX2H1]                  | 0.8154 |

---

Example 153 true smiles: CC(N)C(=O)O formula: C3H7NO2  
 Index of correct structure: 0 of 207  
 True structure loss: 0.011341  
 True structure:

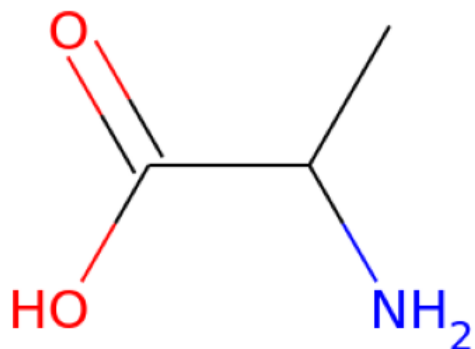

Experimental <sup>13</sup>C NMR (solvent: D2O)

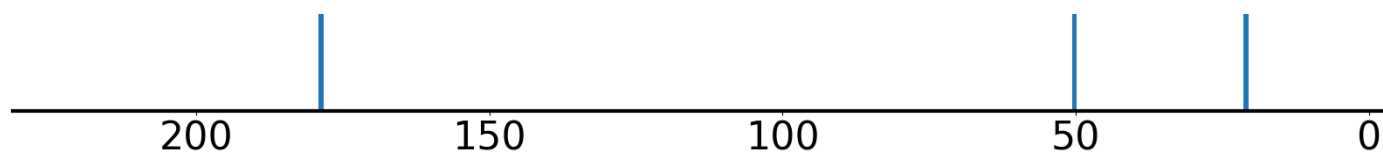

Experimental <sup>1</sup>H NMR (solvent: D2O)

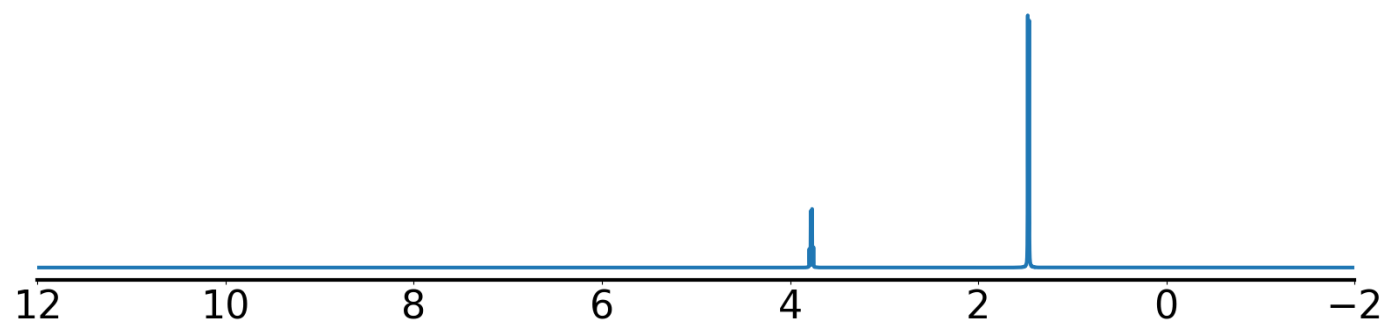

Top predicted structures (loss):

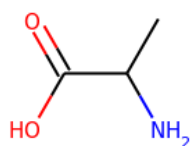

0.011341

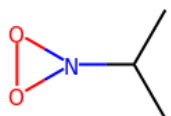

0.04266

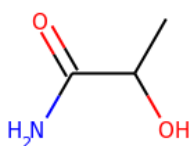

0.05316

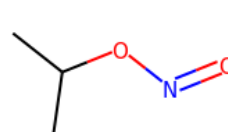

0.059448

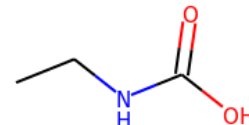

0.060436

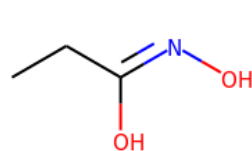

0.061857

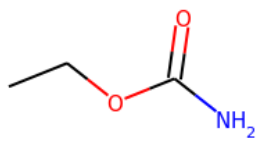

0.062952

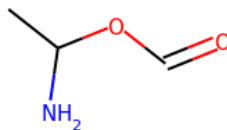

0.065264

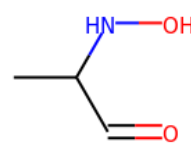

0.067683

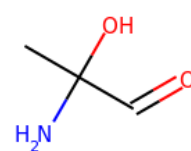

0.070196

Top predicted substructures  
 [CX4H3]

prob  
 0.9993

[#8]=[#6H0][#6H1]

0.9175

|                       |        |                                   |        |
|-----------------------|--------|-----------------------------------|--------|
| [CX4H3][#6]           | 0.9934 | [#7X3H2]                          | 0.9148 |
| [#6H3][#6][#6]        | 0.9923 | [#8]=[#6][#8]                     | 0.9043 |
| [CX3](=[OX1])C        | 0.985  | [CX4H3][CX4H1]                    | 0.89   |
| O=[CX3][CX4H]         | 0.9442 | [OX2H1]                           | 0.8655 |
| best positives        | prob   | best negatives                    | prob   |
| [CX4H3]               | 0.9993 | [CX2H1]#[CX2H0][CX3H1]=[CX3H0]    | 0.0    |
| [CX4H3][#6]           | 0.9934 | CC=CCC#C                          | 0.0    |
| [#6H3][#6][#6]        | 0.9923 | C=CC=CC#C                         | 0.0    |
| [CX3](=[OX1])C        | 0.985  | [CX3H0](=[CX3H1])([CX4H2])[CX2H0] | 0.0    |
| O=[CX3][CX4H]         | 0.9442 | CC=CC#CC                          | 0.0    |
| [#8]=[#6H0][#6H1]     | 0.9175 | C=CCCC#C                          | 0.0    |
| [#7X3H2]              | 0.9148 | CCC#CC#C                          | 0.0    |
| [#8]=[#6][#8]         | 0.9043 | CCC#CC=C                          | 0.0    |
| [CX4H3][CX4H1]        | 0.89   | [CX2H0](#[CX2H1])[CX4H2]          | 0.0    |
| [OX2H1]               | 0.8655 | [CX3H1](=[CX3H2])[CX2H0]          | 0.0    |
| worst negatives       | prob   | worst positives                   | prob   |
| [#7][#6H0][#6H1]      | 0.4468 | [CH3]CC[OH]                       | 0.153  |
| [#8]=[#6][#6H1][#6H1] | 0.3211 | [#8][#6H0][#6H1]                  | 0.5033 |
| [#7H2][#6H0]          | 0.2911 | [#7H2][#6X4H1][#6X3]              | 0.7191 |
| [#7X3H1]              | 0.2705 | [#7][#6][#6H3]                    | 0.735  |
| [CX4H]O               | 0.2573 | [#7][#6][#6X3]                    | 0.7472 |
| [CX4H3][CX4]O         | 0.2464 | [#7H2][#6H1]                      | 0.7725 |
| [#8][#6][#6][#6X3]    | 0.1986 | [#6H3][#6][#6X3]                  | 0.7916 |
| [OH][CX4H]            | 0.1881 | [CX3H0](=[OX1H0])([OX2H1])[CX4H1] | 0.8314 |
| [#6X4H3][#6][#8H]     | 0.1558 | [#6H1]                            | 0.8339 |
| [CX4H2]CC=O           | 0.137  | [CX3](=[OX1])O                    | 0.8379 |

---

Example 154 true smiles: O=CCCC(=O)O formula: C4H6O3  
 Index of correct structure: 0 of 195  
 True structure loss: 0.029319  
 True structure:

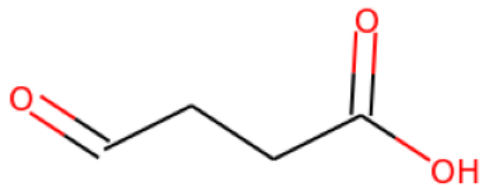

Experimental 13C NMR (solvent: D2O)

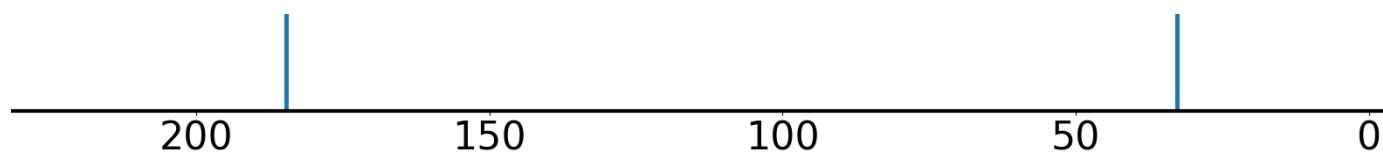

Experimental 1H NMR (solvent: D2O)

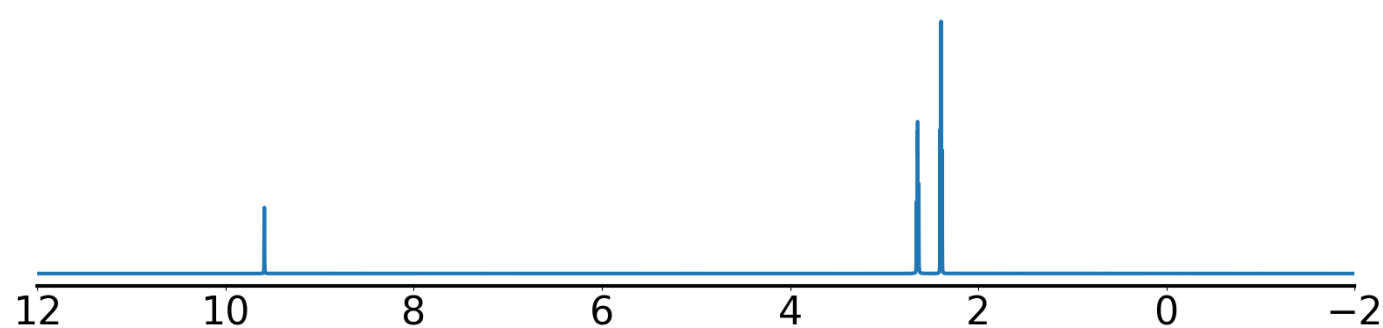

Top predicted structures (loss):

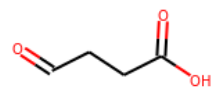

0.029319

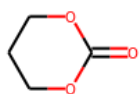

0.065265

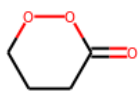

0.066793

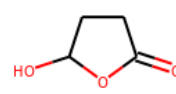

0.068062

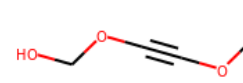

0.072635

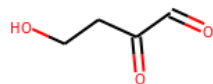

0.073666

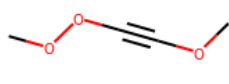

0.074645

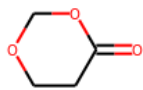

0.089031

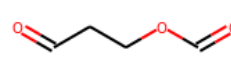

0.090288

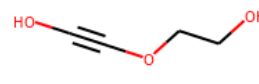

0.097527

Top predicted substructures  
 [CX3](=[OX1])C

prob  
 0.9962

[#6H1]

0.873

|                                   |        |                                   |        |
|-----------------------------------|--------|-----------------------------------|--------|
| [CX3H1](=O)[#6]                   | 0.9911 | [OX2H1]                           | 0.8726 |
| [CX4H2]([#6])[#6]                 | 0.9787 | [CX4H2]CC=O                       | 0.8403 |
| [#8]=[#6][#8]                     | 0.927  | [CX4H2][CX4H2]                    | 0.8351 |
| [CX3](=[OX1])O                    | 0.8876 | OCC[CH2]                          | 0.8214 |
| best positives                    | prob   | best negatives                    | prob   |
| [CX3](=[OX1])C                    | 0.9962 | C=CC=CC#C                         | 0.0    |
| [CX3H1](=O)[#6]                   | 0.9911 | [CX2H1]#[CX2H0][CX3H1]=[CX3H0]    | 0.0    |
| [CX4H2]([#6])[#6]                 | 0.9787 | CC=CC#CC                          | 0.0    |
| [#8]=[#6][#8]                     | 0.927  | [CX3H1](=[CX3H1])[CX2H0]          | 0.0    |
| [CX3](=[OX1])O                    | 0.8876 | CCC#CC#C                          | 0.0    |
| [#6H1]                            | 0.873  | CCC=CC#C                          | 0.0    |
| [OX2H1]                           | 0.8726 | [CX2H0]([#CX2H0])[CX2H0]          | 0.0    |
| [CX4H2]CC=O                       | 0.8403 | [#6H2]=[#6][#6X2]                 | 0.0    |
| [CX4H2][CX4H2]                    | 0.8351 | [CX2H0]([#CX2H1])[CX3H0]          | 0.0    |
| OCC[CH2]                          | 0.8214 | CC=CC#C                           | 0.0    |
| worst negatives                   | prob   | worst positives                   | prob   |
| [#6X3H1][#6X3H0]                  | 0.3981 | [CX4H2][CX3H]                     | 0.0117 |
| O=CC=O                            | 0.3297 | [CX3H1](=[OX1H0])[CX4H2]          | 0.0423 |
| [#8][#6H0][#6H1]                  | 0.3077 | [OX1H0]=[CX3H1][CX4H2][CX4H2]     | 0.0469 |
| [#8][#6][#6]=[#8]                 | 0.2754 | [CX4H2]([CX4H2])[CX3H1]           | 0.0842 |
| [CX4H2]([CX4H2])[CX4H2]           | 0.2414 | [#8]=[#6][#6][#6][#6]=[#8]        | 0.1413 |
| [#8]=[#6H0][#6H1]                 | 0.189  | [#8][#6][#6][#6][#6]=[#8]         | 0.1799 |
| [OX2H0][CX3H0][CX4H2]             | 0.1776 | [#6H1][#6H2]                      | 0.1972 |
| [#6X3][#6X3]                      | 0.1597 | [CX4H2][CX3]=O                    | 0.3995 |
| [#6X3H0][CX4H2][CX4H2][#6X3H0]    | 0.1444 | [OX1H0]=[CX3H0]([#8])[CX4H2]      | 0.4094 |
| [CX3H0](=[OX1H0])([OX2H1])[CX4H1] | 0.1335 | [CX3H0](=[OX1H0])([OX2H1])[CX4H2] | 0.4332 |

---

Example 155 true smiles: CCC(=O)C(=O)O formula: C4H6O3  
 Index of correct structure: 0 of 195  
 True structure loss: 0.008142  
 True structure:

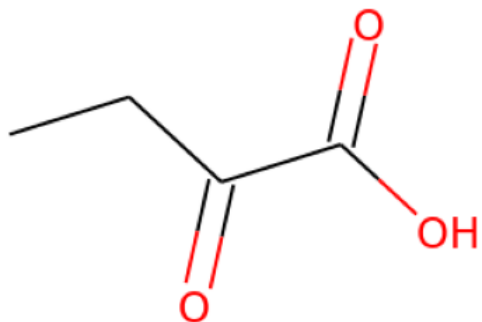

Experimental <sup>13</sup>C NMR (solvent: DMSO)

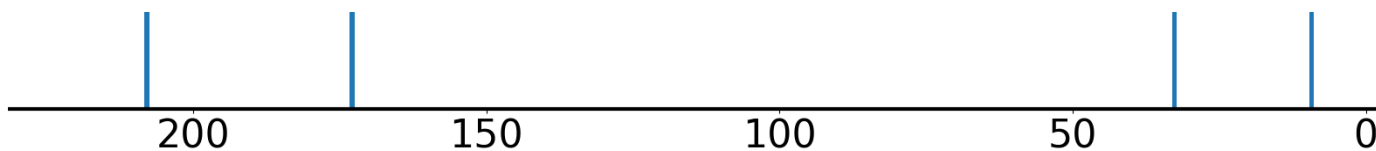

Experimental <sup>1</sup>H NMR (solvent: D2O)

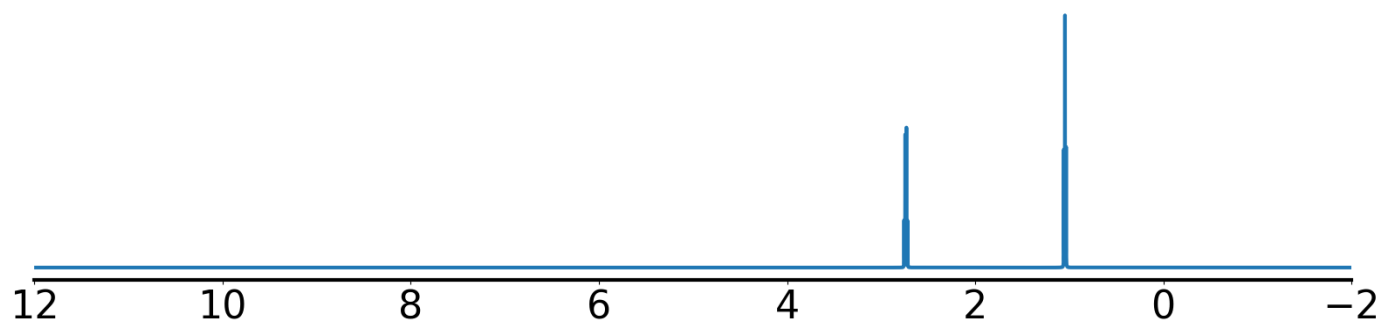

Top predicted structures (loss):

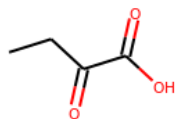

0.008142

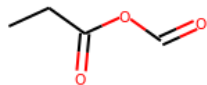

0.051879

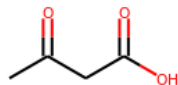

0.089521

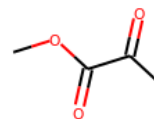

0.10688

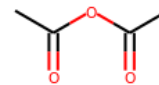

0.112216

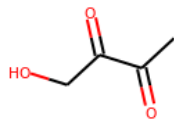

0.112651

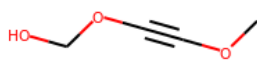

0.121922

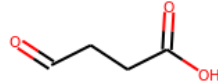

0.122697

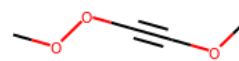

0.124217

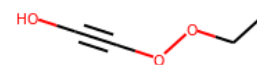

0.130724

Top predicted substructures  
 [CX3](=[OX1])C

prob  
 0.9999

[OX1H0]=[CX3H0]([#6])[CX4H2]

0.9965



|                                   |        |                                       |        |
|-----------------------------------|--------|---------------------------------------|--------|
| [OX1H0]=[CX3H0][CX4H2][CX4H3]     | 0.9994 | [CX4H3][#6]                           | 0.9962 |
| [CX4H2]([#6)][#6]                 | 0.999  | [#6H3][#6][#6]                        | 0.995  |
| [CX4H2]([CX4H3])[CX3H0]           | 0.997  | [CX4H3][CX4H2]                        | 0.9906 |
| [CX4H3]                           | 0.9966 | [#8]=[#6][#8]                         | 0.9831 |
| best positives                    | prob   | best negatives                        | prob   |
| [CX3](=[OX1])C                    | 0.9999 | [CX2H0](#[CX2H1])[CX2H0]              | 0.0    |
| [OX1H0]=[CX3H0][CX4H2][CX4H3]     | 0.9994 | CCC#CC#C                              | 0.0    |
| [CX4H2]([#6)][#6]                 | 0.999  | [CX3H1](=[CX3H2])[CX2H0]              | 0.0    |
| [CX4H2]([CX4H3])[CX3H0]           | 0.997  | [OX2H0]1[CX4H2][CX4H2][CX4H1][CX4H1]1 | 0.0    |
| [CX4H3]                           | 0.9966 | CCC=CC#C                              | 0.0    |
| [OX1H0]=[CX3H0]([#6])[CX4H2]      | 0.9965 | C=CCCC#C                              | 0.0    |
| [CX4H3][#6]                       | 0.9962 | [CX3H0](=[CX3H1])([CX4H1])[CX2H0]     | 0.0    |
| [#6H3][#6][#6]                    | 0.995  | [CX2H0](#[CX2H0])[CX2H0]              | 0.0    |
| [CX4H3][CX4H2]                    | 0.9906 | [CX2H0](#[CX2H1])[CX3H1]              | 0.0    |
| [#8]=[#6][#8]                     | 0.9831 | C=CC=CC#C                             | 0.0    |
| worst negatives                   | prob   | worst positives                       | prob   |
| [OX1H0]=[CX3H0]([#8])[CX4H2]      | 0.469  | OCC[CH2]                              | 0.5116 |
| [#8][#6][#6H2]                    | 0.3429 | [CX4H2]CC=O                           | 0.5538 |
| [#8]=[#6][#6][#6][#6]=[#8]        | 0.2988 | [CX3H0](=[OX1H0])([OX2H1])[CX3H0]     | 0.5577 |
| O=[#6][#6][#6X3]                  | 0.277  | [#6X3][#6X3]                          | 0.6624 |
| [OX2H0][CX3H0][CX4H2]             | 0.2184 | [#6X3][#6][#6][#6H3]                  | 0.6751 |
| [#8X1]=[#6X3][#6H2][#6H0]         | 0.1557 | [CX3](=O)[OX2H1]                      | 0.6898 |
| [#8][#6][#6][#6X3]                | 0.1495 | [#8][#6][#6]=[#8]                     | 0.7467 |
| [CX3H0](=[OX1H0])([OX2H1])[CX4H2] | 0.1464 | O=CC=O                                | 0.8112 |
| [#6X3][#6H2][#6X3]                | 0.0971 | [#8]=[#6][#6]=[#8]                    | 0.8589 |
| CCCCC                             | 0.0713 | [OX2H1]                               | 0.8999 |

---

Example 156 true smiles: CC(=O)CC(=O)O formula: C4H6O3  
 Index of correct structure: 0 of 195  
 True structure loss: 0.015394  
 True structure:

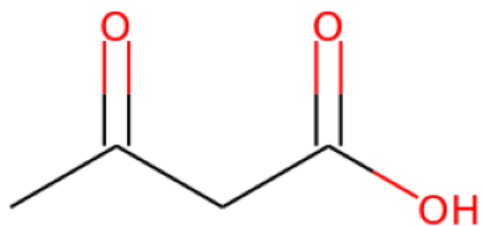

Experimental 13C NMR (solvent: D2O)

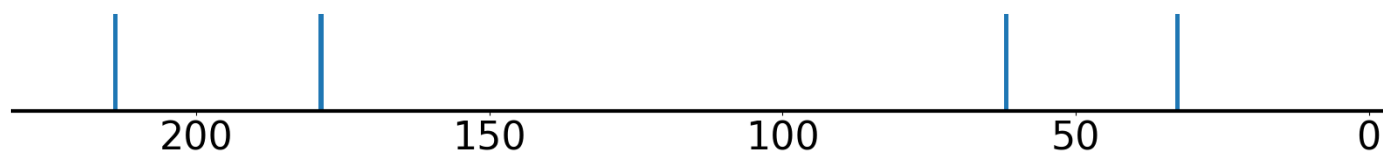

Experimental 1H NMR (solvent: D2O)

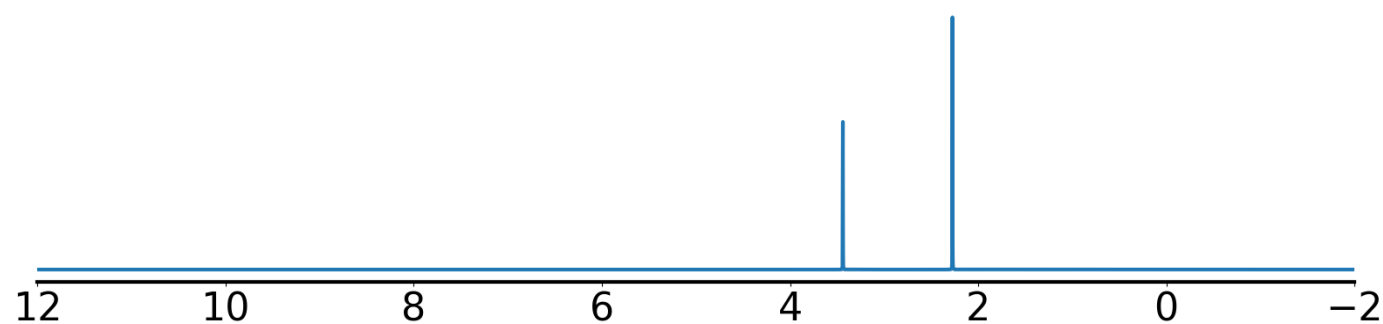

Top predicted structures (loss):

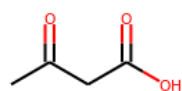

0.015394

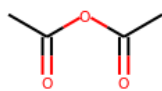

0.050129

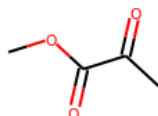

0.063121

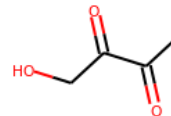

0.079611

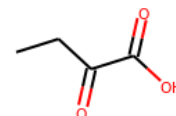

0.08312

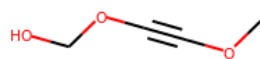

0.087835

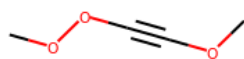

0.088136

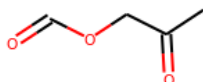

0.094407

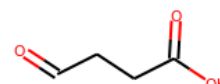

0.097968

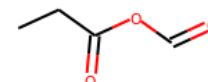

0.106133

Top predicted substructures  
 [CX3](=[OX1])C

prob  
 1.0

[OX1H0]=[CX3H0][CX4H3]

0.9704

|                         |        |                |        |
|-------------------------|--------|----------------|--------|
| [CX4H3]                 | 0.997  | [#6H3][#6H0]   | 0.9487 |
| [CX4H3][CX3]            | 0.9862 | [CX4H2][CX3]=O | 0.9306 |
| [CX4H3][CX3H0]          | 0.978  | [#6H3][#6][#6] | 0.8891 |
| [CX4H2]([CX3H0])[CX3H0] | 0.9753 | [CX3](=[OX1])O | 0.8459 |

| best positives          | prob   | best negatives                    | prob |
|-------------------------|--------|-----------------------------------|------|
| [CX3](=[OX1])C          | 1.0    | CC=CC#CC                          | 0.0  |
| [CX4H3]                 | 0.997  | [#6X2][#6H1][#6X2]                | 0.0  |
| [CX4H3][CX3]            | 0.9862 | [CX3H1](=[CX3H2])[CX2H0]          | 0.0  |
| [CX4H3][CX3H0]          | 0.978  | CC=CCC#C                          | 0.0  |
| [CX4H2]([CX3H0])[CX3H0] | 0.9753 | CCC#CC=C                          | 0.0  |
| [OX1H0]=[CX3H0][CX4H3]  | 0.9704 | C=CC=CC#C                         | 0.0  |
| [#6H3][#6H0]            | 0.9487 | CCC=CC#C                          | 0.0  |
| [CX4H2][CX3]=O          | 0.9306 | [#6H2]=[#6][#6X2]                 | 0.0  |
| [#6H3][#6][#6]          | 0.8891 | [CX4H1]([CX4H1])([CX4H1])[CX2H0]  | 0.0  |
| [CX3](=[OX1])O          | 0.8459 | [CX3H0](=[CX3H1])([CX4H1])[CX2H0] | 0.0  |

| worst negatives            | prob   | worst positives                   | prob   |
|----------------------------|--------|-----------------------------------|--------|
| [CX4H3][OX2H0]             | 0.4627 | [#6X3][#6][#6][#6H3]              | 0.2811 |
| [#8]=[#6][#6][#6][#6]=[#8] | 0.4536 | [#8][#6][#6][#6X3]                | 0.468  |
| [CX4H2]CC=O                | 0.3838 | [CX3H0](=[OX1H0])([OX2H1])[CX4H2] | 0.4844 |
| [#8][#6][#6][#6][#6]=[#8]  | 0.3529 | [#6H3][#6X3H0][#6H2]              | 0.5088 |
| O=CC=O                     | 0.2683 | [CX4H2]([#6][#6])                 | 0.5449 |
| [#8][#6][#6][#6]=[#8]      | 0.2257 | [#8][#6][#6H2]                    | 0.5671 |
| [#6H3][#6][#6X3]           | 0.2101 | [OX2H1]                           | 0.5715 |
| [#8]=[#6][#6]=[#8]         | 0.2052 | O=[#6][#6][#6X3]                  | 0.5936 |
| [#8]=[#6H0][#6H1]          | 0.1744 | [CX3H0](=[OX1H0])([CX4H3])[CX4H2] | 0.6666 |
| OCC[CH2]                   | 0.1712 | [CX3](=O)[OX2H1]                  | 0.687  |

-----

Example 157 true smiles: CCCC(=O)CC formula: C6H12O  
 Index of correct structure: 0 of 193  
 True structure loss: 0.004278  
 True structure:

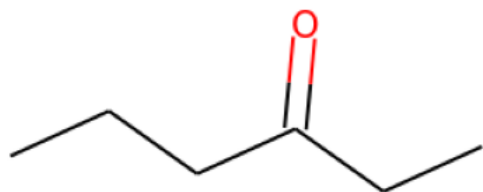

Experimental <sup>13</sup>C NMR (solvent: CDCl<sub>3</sub>)

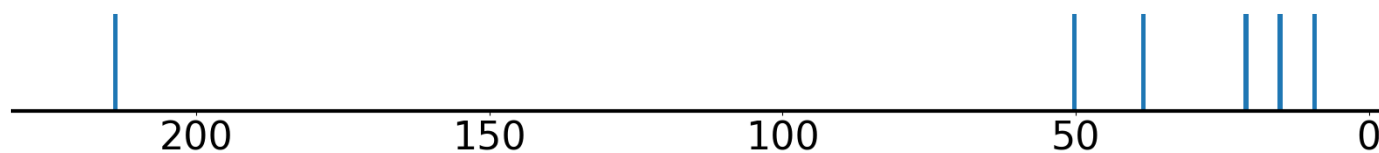

Experimental <sup>1</sup>H NMR (solvent: D<sub>2</sub>O)

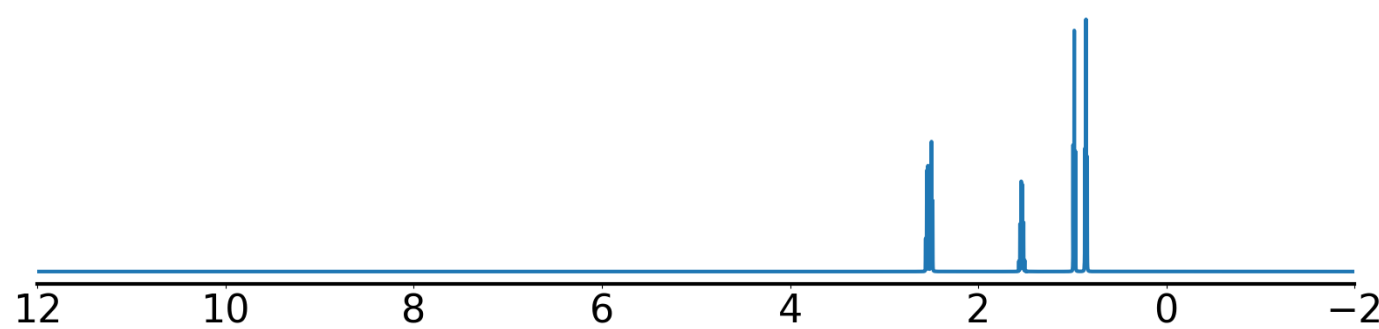

Top predicted structures (loss):

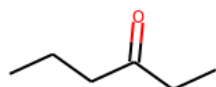

0.004278

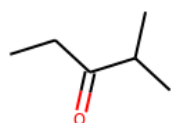

0.043035

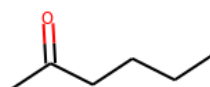

0.063048

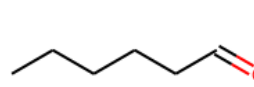

0.068929

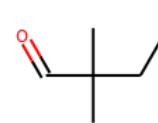

0.08883

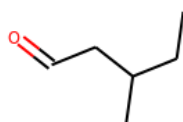

0.097767

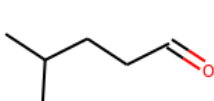

0.103281

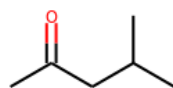

0.110448

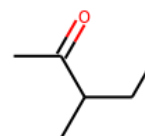

0.113741

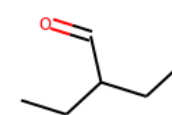

0.117429

Top predicted substructures  
[CX4H3][CX4H2]

prob  
 1.0

[CX4H3][#6]

0.9997

|                                   |        |                                   |        |
|-----------------------------------|--------|-----------------------------------|--------|
| [CX4H3]                           | 1.0    | [OX1H0]=[CX3H0]([#6])[CX4H2]      | 0.9996 |
| [CX4H2]([#6])[#6]                 | 1.0    | [OX1H0]=[CX3H0][CX4H2][CX4H3]     | 0.9835 |
| [CX3](=[OX1])C                    | 0.9999 | [CX4H2][CX3]=O                    | 0.9814 |
| [#6H3][#6][#6]                    | 0.9999 | [CX4H2]([CX4H3])[CX4H2]           | 0.9508 |
| best positives                    | prob   | best negatives                    | prob   |
| [CX4H3][CX4H2]                    | 1.0    | C=CC=CC#C                         | 0.0    |
| [CX4H3]                           | 1.0    | C=CCCC#C                          | 0.0    |
| [CX4H2]([#6])[#6]                 | 1.0    | [CX2H0]([#CX2H1])[CX3H0]          | 0.0    |
| [CX3](=[OX1])C                    | 0.9999 | [CX2H0]([#CX2H1])[CX3H1]          | 0.0    |
| [#6H3][#6][#6]                    | 0.9999 | CCC=CC#C                          | 0.0    |
| [CX4H3][#6]                       | 0.9997 | [CX2H0]([#CX2H0])[CX2H0]          | 0.0    |
| [OX1H0]=[CX3H0]([#6])[CX4H2]      | 0.9996 | [CX2H0]([#CX2H1])[CX2H0]          | 0.0    |
| [OX1H0]=[CX3H0][CX4H2][CX4H3]     | 0.9835 | CCC#CC=C                          | 0.0    |
| [CX4H2][CX3]=O                    | 0.9814 | CC=CC#CC                          | 0.0    |
| [CX4H2]([CX4H3])[CX4H2]           | 0.9508 | [OX2H1][CX4H1][CX4H1][CX2H0]      | 0.0    |
| worst negatives                   | prob   | worst positives                   | prob   |
| [#8]=[#6][#6H2][#6H1]             | 0.1648 | O=[CX3H0][CX4H2][CX4H2]           | 0.6941 |
| [#8]=[#6H0][#6H1]                 | 0.1392 | [#6H3][#6][#6X3]                  | 0.7058 |
| [#6H3][#6][#6][#6H3]              | 0.1214 | [CX4H2]CC=O                       | 0.7405 |
| [CX4H3][CX4H1]                    | 0.1185 | [#6X3][#6][#6][#6H3]              | 0.7461 |
| [CX3H0](=[OX1H0])([CX4H2])[CX4H1] | 0.1178 | CCCCC                             | 0.8021 |
| [#6H1]                            | 0.1142 | [#6H2][#6X3H0][#6H2]              | 0.8155 |
| [#6H1][#6H2]                      | 0.1054 | [CX3H0](=[OX1H0])([CX4H2])[CX4H2] | 0.8414 |
| O=[CX3][CX4H]                     | 0.0938 | [CX4H2][CX4H2]                    | 0.8504 |
| [CX4H2]([CX4H2])[CX4H1]           | 0.0815 | [CX4H2]([CX4H2])[CX3H0]           | 0.8792 |
| O=[CX3H0][CX4H2][CX4H1]           | 0.0606 | [CX4H2]([CX4H3])[CX3H0]           | 0.9226 |

---

Example 158 true smiles: CC(=O)C(C)(C)C formula: C6H12O  
 Index of correct structure: 0 of 193  
 True structure loss: 0.007709  
 True structure:

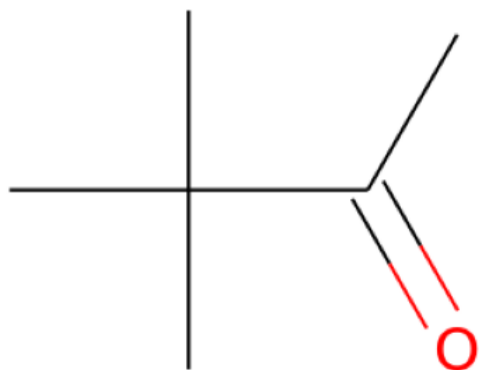

Experimental <sup>13</sup>C NMR (solvent: CDCl<sub>3</sub>)

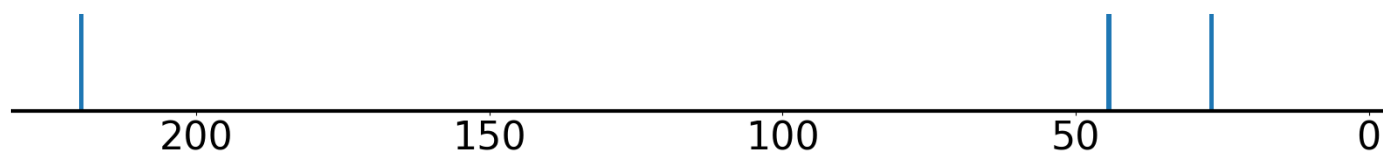

Experimental <sup>1</sup>H NMR (solvent: CDCl<sub>3</sub>)

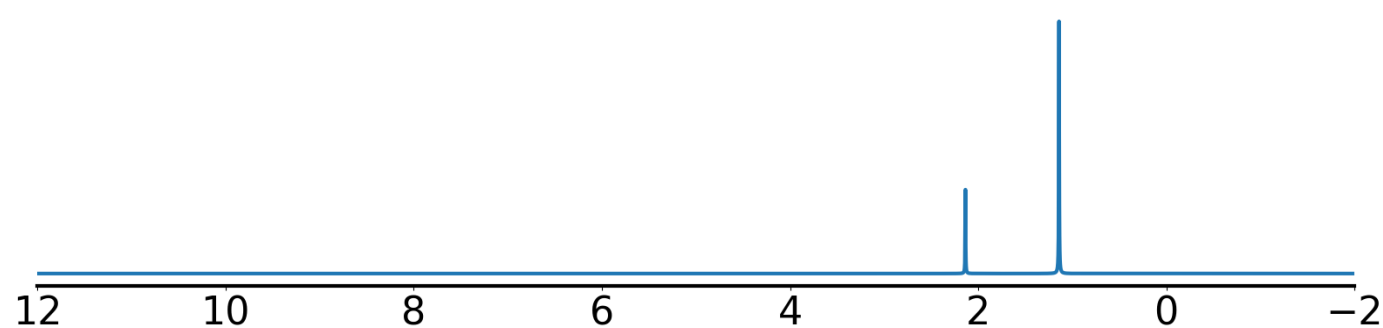

Top predicted structures (loss):

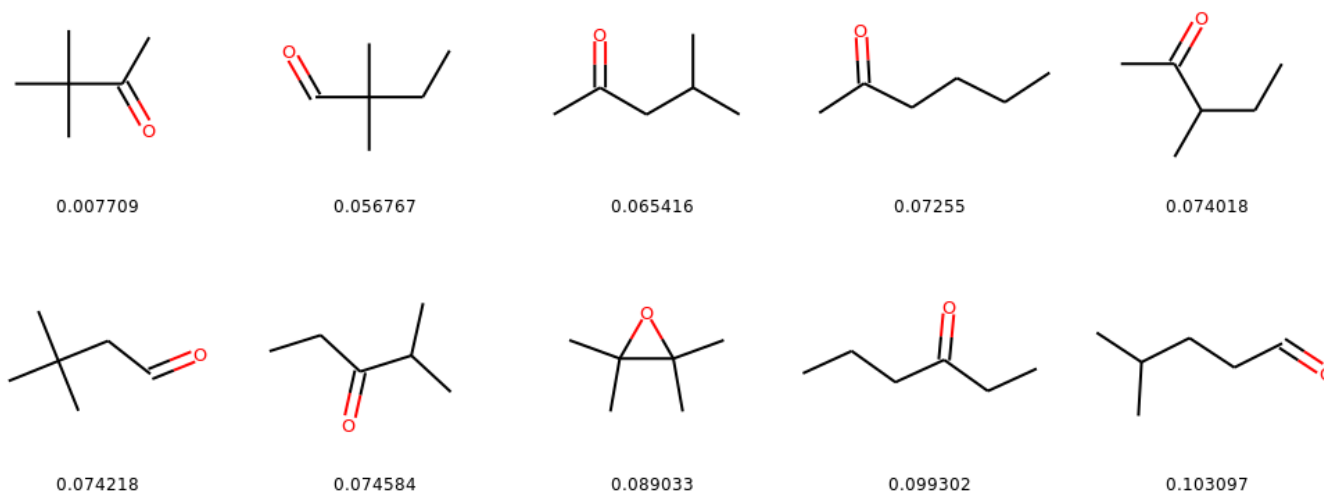

Top predicted substructures  
 [#6H3][#6][#6]

prob  
 0.9999

[CX4H3][CX4H0][CX4H3]

0.9969

|                                   |        |                                    |        |
|-----------------------------------|--------|------------------------------------|--------|
| [CX3](=[OX1])C                    | 0.9995 | [CX4H3][CX4H0]                     | 0.9915 |
| [CX4H3]                           | 0.9993 | [CX4H3][CX3]                       | 0.9662 |
| [CX4H3][#6]                       | 0.9987 | [CX3H0](=[OX1H0])([CX4H3])[CX4H0]  | 0.9079 |
| [#6H3][#6H0]                      | 0.9984 | [CX4H3][CX3H0]                     | 0.8839 |
| best positives                    | prob   | best negatives                     | prob   |
| [#6H3][#6][#6]                    | 0.9999 | CCC#CC#C                           | 0.0    |
| [CX3](=[OX1])C                    | 0.9995 | C=CC=CC#C                          | 0.0    |
| [CX4H3]                           | 0.9993 | [CX3H0](=[CX3H1])([OX2H0])[CX2H0]  | 0.0    |
| [CX4H3][#6]                       | 0.9987 | [CX2H0](#[CX2H1])[CX3H0]           | 0.0    |
| [#6H3][#6H0]                      | 0.9984 | CC=CCC#C                           | 0.0    |
| [CX4H3][CX4H0][CX4H3]             | 0.9969 | #[7][#6]=[#6][#6]#[#7]             | 0.0    |
| [CX4H3][CX4H0]                    | 0.9915 | CC=CC#CC                           | 0.0    |
| [CX4H3][CX3]                      | 0.9662 | [CX4H1]( [OX2H0])( [CX4H1])[CX2H0] | 0.0    |
| [CX3H0](=[OX1H0])([CX4H3])[CX4H0] | 0.9079 | [CX2H1]#[CX2H0][CX3H1]=[CX3H0]     | 0.0    |
| [CX4H3][CX3H0]                    | 0.8839 | [CX2H0](#[CX2H1])[CX2H0]           | 0.0    |
| worst negatives                   | prob   | worst positives                    | prob   |
| [#6H1]                            | 0.5581 | [#6H3][#6][#6][#6H3]               | 0.3797 |
| [CX4H2][CX3]=0                    | 0.5449 | [#6H3][#6][#6X3]                   | 0.7535 |
| [#6X3][#6][#6][#6H3]              | 0.4247 | [OX1H0]=[CX3H0][CX4H3]             | 0.8426 |
| [CX4H3][CX4H1]                    | 0.3629 | [OX1H0]=[CX3H0][CX4H0][CX4H3]      | 0.8432 |
| [#8]=[#6H0][#6H1]                 | 0.2848 | [CX4]([CX4H3])([CX4H3])[CX4H3]     | 0.8489 |
| [CX4H2]CC=0                       | 0.2573 | [CX4H3][CX3H0]                     | 0.8839 |
| [CX4H1]([CX4H3])([CX4H3])[CX3H0]  | 0.2202 | [CX3H0](=[OX1H0])([CX4H3])[CX4H0]  | 0.9079 |
| O=[CX3][CX4H]                     | 0.1856 | [CX4H3][CX3]                       | 0.9662 |
| O=[#6][#6H][#6H0]                 | 0.1538 | [CX4H3][CX4H0]                     | 0.9915 |
| [CHX4]([CH3X4])([CH3X4])          | 0.1528 | [CX4H3][CX4H0][CX4H3]              | 0.9969 |

---

Example 159 true smiles: CCCCC=O formula: C6H12O  
 Index of correct structure: 0 of 193  
 True structure loss: 0.006741  
 True structure:

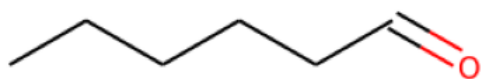

Experimental <sup>13</sup>C NMR (solvent: CDCl<sub>3</sub>)

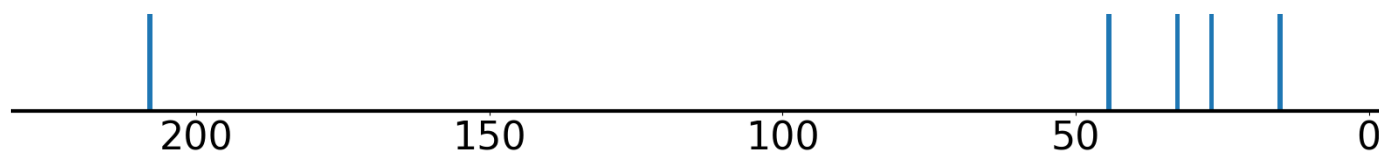

Experimental <sup>1</sup>H NMR (solvent: CDCl<sub>3</sub>)

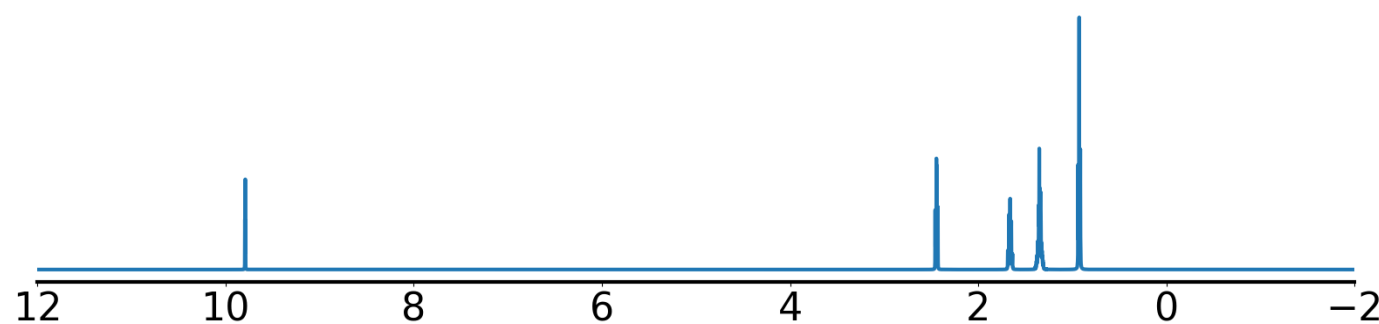

Top predicted structures (loss):

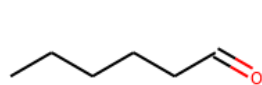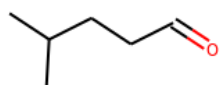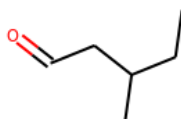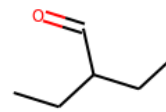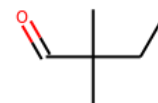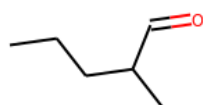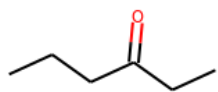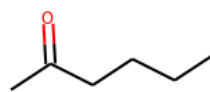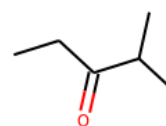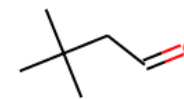

Top predicted substructures  
 [CX3H1](=O)[#6]

prob  
 1.0

[CX4H3]

0.9973



|                                  |        |                                   |        |
|----------------------------------|--------|-----------------------------------|--------|
| [CX4H2]([#6])[#6]                | 0.9999 | [#6H3][#6][#6]                    | 0.9969 |
| [CX3](=[OX1])C                   | 0.9998 | [#6H1]                            | 0.995  |
| [CX4H3][CX4H2]                   | 0.9992 | [CX4H2]CC=O                       | 0.9574 |
| [CX4H3][#6]                      | 0.9979 | [CX4H2]([CX4H2])[CX4H2]           | 0.9134 |
| best positives                   | prob   | best negatives                    | prob   |
| [CX3H1](=O)[#6]                  | 1.0    | [CX2H0](#[CX2H1])[CX3H0]          | 0.0    |
| [CX4H2]([#6])[#6]                | 0.9999 | [CX3H0](=[CX3H1])([OX2H0])[CX2H0] | 0.0    |
| [CX3](=[OX1])C                   | 0.9998 | [CX2H0](#[CX2H0])[CX2H0]          | 0.0    |
| [CX4H3][CX4H2]                   | 0.9992 | [CX2H1]#[CX2H0][CX3H1]=[CX3H0]    | 0.0    |
| [CX4H3][#6]                      | 0.9979 | C=CC=CC#C                         | 0.0    |
| [CX4H3]                          | 0.9973 | [OX2H1][CX4H1][CX4H1][CX2H0]      | 0.0    |
| [#6H3][#6][#6]                   | 0.9969 | [CX4H1]([OX2H0])([CX4H1])[CX2H0]  | 0.0    |
| [#6H1]                           | 0.995  | CC#CCC#C                          | 0.0    |
| [CX4H2]CC=O                      | 0.9574 | CCC=CC#C                          | 0.0    |
| [CX4H2]([CX4H2])[CX4H2]          | 0.9134 | [#6X2][#6H1][#6X2]                | 0.0    |
| worst negatives                  | prob   | worst positives                   | prob   |
| [#6X3][#6][#6][#6H3]             | 0.2147 | [CX4H2][CX3H]                     | 0.3727 |
| [CX4H2]([CX4H3])[CX4H1]          | 0.1231 | [CX4H2]([CX4H2])[CX3H1]           | 0.4797 |
| [CX4H1]([CX4H3])([CX4H3])[CX4H2] | 0.1108 | [CX4H2][CX3]=O                    | 0.5063 |
| [CX3H1](=[OX1H0])[CX4H0]         | 0.1074 | [#6H1][#6H2]                      | 0.6097 |
| [#6H1][#6H1]                     | 0.107  | CCCCC                             | 0.6468 |
| [CX4H2]([CX4H2])[CX4H1]          | 0.1042 | [OX1H0]=[CX3H1][CX4H2][CX4H2]     | 0.6508 |
| [#6H1]([#6H2])[#6H2]             | 0.0985 | [CX4H2][CX4H2][CX4H2][CX4H2]      | 0.7191 |
| [CX4H3][CX4H1]                   | 0.0728 | [CX3H1](=[OX1H0])[CX4H2]          | 0.7238 |
| [#6H3][#6][#6X3]                 | 0.0519 | [CX4H2][CX4H2]                    | 0.8842 |
| [CX4H2]([CX4H2])[CX3H0]          | 0.0481 | [CX4H2]([CX4H3])[CX4H2]           | 0.8852 |

---

Example 160 true smiles: CC(=O)CC(C)C formula: C6H12O  
 Index of correct structure: 0 of 193  
 True structure loss: 0.009541  
 True structure:

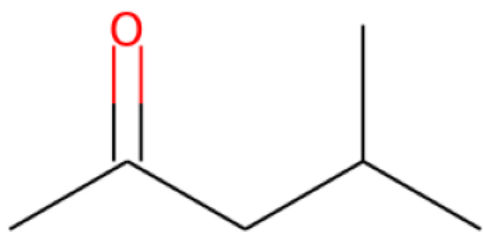

Experimental <sup>13</sup>C NMR (solvent: CDCl<sub>3</sub>)

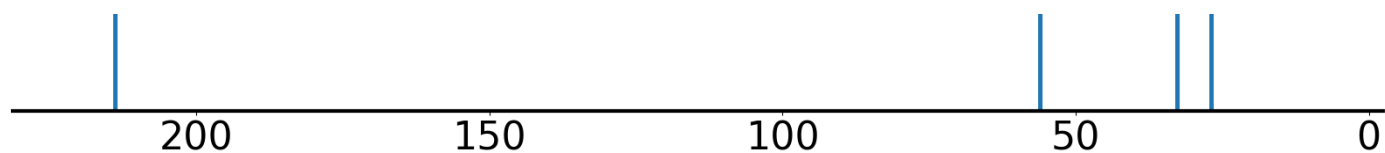

Experimental <sup>1</sup>H NMR (solvent: D<sub>2</sub>O)

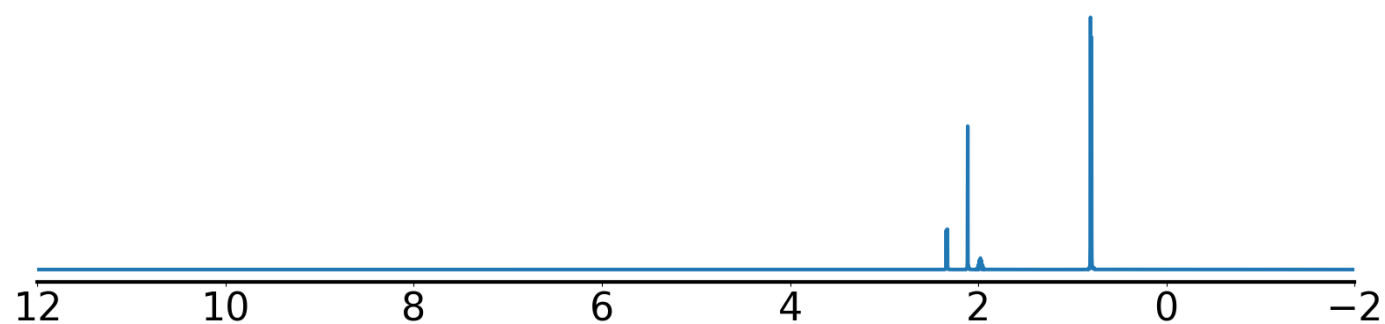

Top predicted structures (loss):

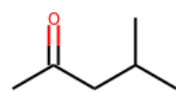

0.009541

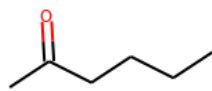

0.043412

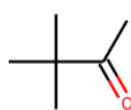

0.047147

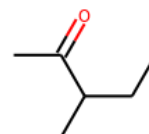

0.070068

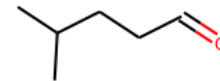

0.076053

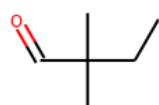

0.083305

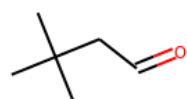

0.09189

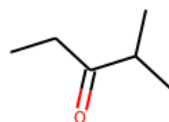

0.09201

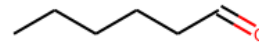

0.096687

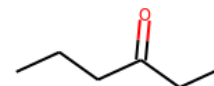

0.099413

Top predicted substructures  
 [#6H3][#6][#6]

prob  
 1.0

[OX1H0]=[CX3H0][CX4H3]

0.9982

|                                   |        |                                   |        |
|-----------------------------------|--------|-----------------------------------|--------|
| [CX4H3]                           | 1.0    | [CX4H3][CX3]                      | 0.9981 |
| [CX3](=[OX1])C                    | 0.9996 | [#6H3][#6H0]                      | 0.9626 |
| [CX4H3][#6]                       | 0.9993 | [CX3H0](=[OX1H0])([CX4H3])[CX4H2] | 0.9611 |
| [CX4H3][CX3H0]                    | 0.9983 | [CX4H1]([CX4H3])([CX4H3])[CX4H2]  | 0.9469 |
| best positives                    | prob   | best negatives                    | prob   |
| [#6H3][#6][#6]                    | 1.0    | [CX2H0](#[CX2H1])[CX3H0]          | 0.0    |
| [CX4H3]                           | 1.0    | C=CC=CC#C                         | 0.0    |
| [CX3](=[OX1])C                    | 0.9996 | CCC=CC#C                          | 0.0    |
| [CX4H3][#6]                       | 0.9993 | CC=CC#CC                          | 0.0    |
| [CX4H3][CX3H0]                    | 0.9983 | [CX2H0](#[CX2H0])[CX2H0]          | 0.0    |
| [OX1H0]=[CX3H0][CX4H3]            | 0.9982 | CCC#CC#C                          | 0.0    |
| [CX4H3][CX3]                      | 0.9981 | [CX3H0](=[CX3H1])([OX2H0])[CX2H0] | 0.0    |
| [#6H3][#6H0]                      | 0.9626 | [CX2H1]#[CX2H0][CX3H1]=[CX3H0]    | 0.0    |
| [CX3H0](=[OX1H0])([CX4H3])[CX4H2] | 0.9611 | CCC#CC=C                          | 0.0    |
| [CX4H1]([CX4H3])([CX4H3])[CX4H2]  | 0.9469 | [CX4H1]([OX2H0])([CX4H1])[CX2H0]  | 0.0    |
| worst negatives                   | prob   | worst positives                   | prob   |
| [CX4H2]CC=O                       | 0.5612 | [#6H1][#6H2]                      | 0.4289 |
| CCCCC                             | 0.2617 | [CX4H2]([CX4H1])[CX3H0]           | 0.4298 |
| [#6H3][#6H0]([#6H2])[#6H2]        | 0.2057 | [#8]=[#6][#6H2][#6H1]             | 0.4642 |
| [#8X1]=[#6X3][#6H2][#6H0]         | 0.1921 | O=[CX3H0][CX4H2][CX4H1]           | 0.4758 |
| [#6H3][#6][#6X3]                  | 0.1103 | [CHX4]([CH3X4])[CH2X4]            | 0.5663 |
| [CX4H2][CX4H2]                    | 0.1    | [CX4H3][CX4H1]                    | 0.5814 |
| [OX1H0]=[CX3H0][CX4H2][CX4H0]     | 0.0946 | [#6H1]                            | 0.588  |
| [CX3H0](=[OX1H0])([CX4H3])[CX4H0] | 0.0846 | [CHX4]([CH3X4])[CH3X4]            | 0.7787 |
| [CX4H3][CX4H0]                    | 0.0749 | [#6X3][#6][#6H3]                  | 0.7862 |
| O=[CX3H0][CX4H2][CX4H2]           | 0.0741 | [CX4H2][CX3]=O                    | 0.8085 |

---

Example 161 true smiles: CCCCC(C)=O formula: C6H12O  
 Index of correct structure: 0 of 193  
 True structure loss: 0.003486  
 True structure:

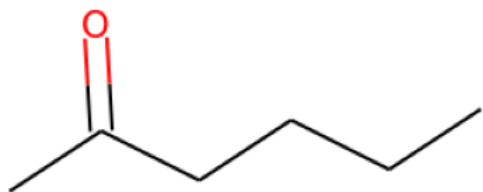

Experimental <sup>13</sup>C NMR (solvent: CDCl<sub>3</sub>)

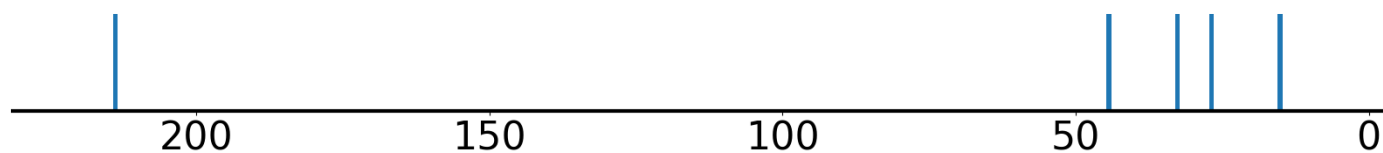

Experimental <sup>1</sup>H NMR (solvent: D<sub>2</sub>O)

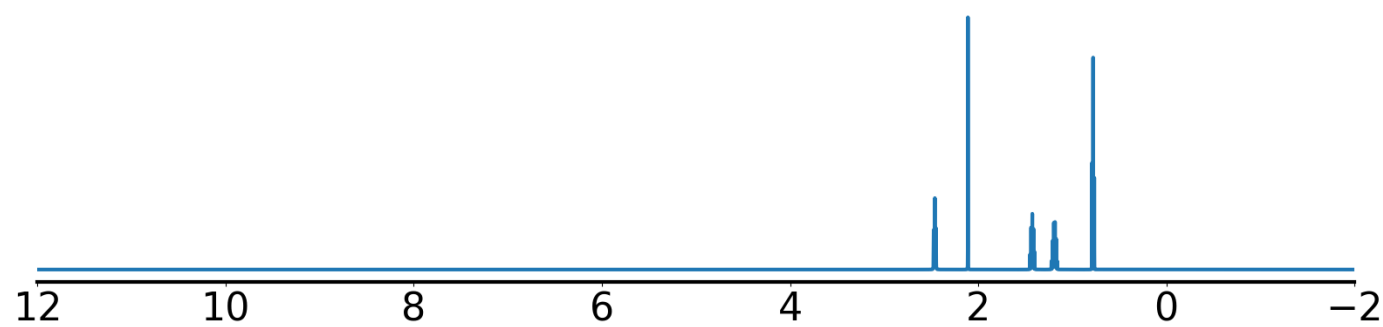

Top predicted structures (loss):

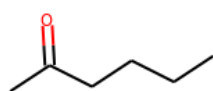

0.003486

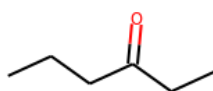

0.054926

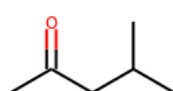

0.057944

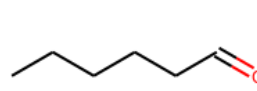

0.070309

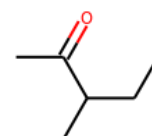

0.078111

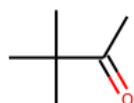

0.092744

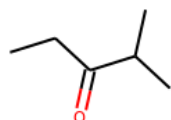

0.097976

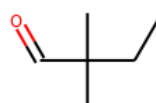

0.099465

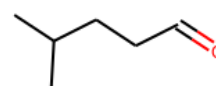

0.109902

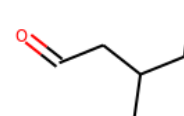

0.118524

Top predicted substructures  
 [CX4H3]

prob  
 0.9998

[CX4H3][CX4H2]

0.9985

|                                   |        |                                   |        |
|-----------------------------------|--------|-----------------------------------|--------|
| [CX3](=[OX1])C                    | 0.9998 | [CX4H3][CX3H0]                    | 0.9979 |
| [#6H3][#6][#6]                    | 0.9996 | [CX4H3][CX3]                      | 0.997  |
| [CX4H2]([#6])[#6]                 | 0.9995 | [OX1H0]=[CX3H0][CX4H3]            | 0.9953 |
| [CX4H3][#6]                       | 0.9993 | [CX3H0](=[OX1H0])([CX4H3])[CX4H2] | 0.9871 |
| best positives                    | prob   | best negatives                    | prob   |
| [CX4H3]                           | 0.9998 | [CX2H0](#[CX2H1])[CX3H0]          | 0.0    |
| [CX3](=[OX1])C                    | 0.9998 | C=CC=CC#C                         | 0.0    |
| [#6H3][#6][#6]                    | 0.9996 | CCC#CC#C                          | 0.0    |
| [CX4H2]([#6])[#6]                 | 0.9995 | [CX2H0](#[CX2H0])[CX2H0]          | 0.0    |
| [CX4H3][#6]                       | 0.9993 | CCC=CC#C                          | 0.0    |
| [CX4H3][CX4H2]                    | 0.9985 | CC=CC#CC                          | 0.0    |
| [CX4H3][CX3H0]                    | 0.9979 | [CX2H0](#[CX2H1])[CX3H1]          | 0.0    |
| [CX4H3][CX3]                      | 0.997  | CC=CCC#C                          | 0.0    |
| [OX1H0]=[CX3H0][CX4H3]            | 0.9953 | [CX2H1]#[CX2H0][CX3H1]=[CX3H0]    | 0.0    |
| [CX3H0](=[OX1H0])([CX4H3])[CX4H2] | 0.9871 | [CX3H0](=[CX3H1])([OX2H0])[CX2H0] | 0.0    |
| worst negatives                   | prob   | worst positives                   | prob   |
| [#6X3][#6][#6][#6H3]              | 0.2448 | [CX4H2]([CX4H2])[CX4H2]           | 0.752  |
| [CX4H2][CX4H2][CX4H2][CX4H2]      | 0.2329 | CCCCC                             | 0.7559 |
| [#6H1][#6H2]                      | 0.1865 | [CX4H2][CX4H2]                    | 0.7812 |
| [#6H3][#6][#6X3]                  | 0.1378 | [CX4H2]CC=O                       | 0.9099 |
| [#6H1]                            | 0.1272 | [CX4H2][CX3]=O                    | 0.9109 |
| [#6H3][#6][#6][#6H3]              | 0.1162 | [#6H3][#6X3H0][#6H2]              | 0.9166 |
| [#6H2][#6X3H0][#6H2]              | 0.0517 | [CX4H2]([CX4H2])[CX3H0]           | 0.9228 |
| [OX1H0]=[CX3H1][CX4H2][CX4H2]     | 0.0493 | [#6H3][#6H0]                      | 0.9492 |
| [#8]=[#6H0][#6H1]                 | 0.0469 | [CX4H2]([CX4H3])[CX4H2]           | 0.9667 |
| [CX4H3][CX4H1]                    | 0.0448 | O=[CX3H0][CX4H2][CX4H2]           | 0.9765 |

---

Example 162 true smiles: CCCCC1O1 formula: C6H12O  
 Index of correct structure: 0 of 193  
 True structure loss: 0.010964  
 True structure:

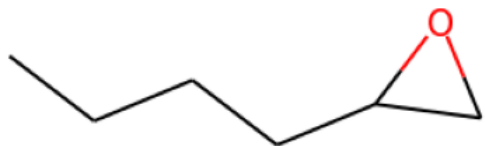

Experimental 13C NMR (solvent: CDCl3)

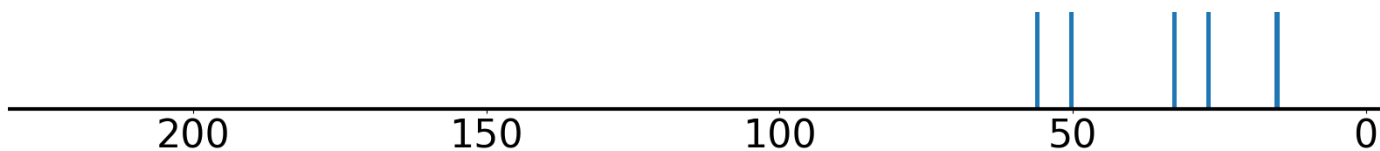

Experimental 1H NMR (solvent: CDCl3)

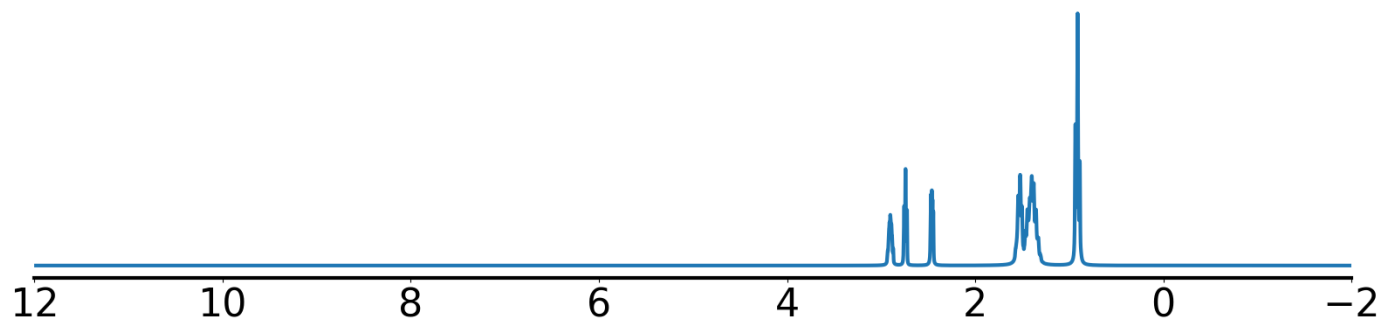

Top predicted structures (loss):

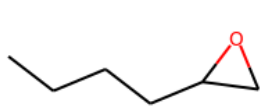

0.010964

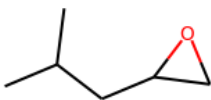

0.039952

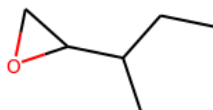

0.047401

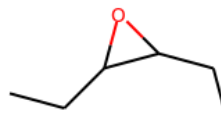

0.054853

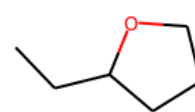

0.079513

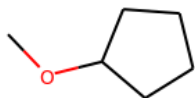

0.081922

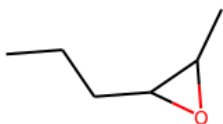

0.088865

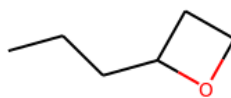

0.092896

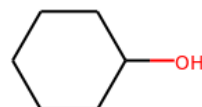

0.094128

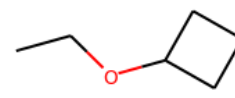

0.094401

Top predicted substructures  
 [CX4H3]

prob  
 0.9999

[CX4H3][#6]

0.9924

|                                  |        |                                   |        |
|----------------------------------|--------|-----------------------------------|--------|
| [#6H3][#6][#6]                   | 0.9994 | [#6H1]                            | 0.9904 |
| [CX4H2]([#6])[#6]                | 0.9993 | [#6H2][#6H1r3]                    | 0.9852 |
| [CX4H3][CX4H2]                   | 0.9983 | [CX4H]O                           | 0.985  |
| [OX2H0]1[CX4H2][CX4H1]1          | 0.9978 | C1OC1                             | 0.9811 |
| best positives                   |        |                                   |        |
| [CX4H3]                          | prob   | best negatives                    | prob   |
| [#6H3][#6][#6]                   | 0.9999 | [CX2H1]#[CX2H0][CX3H1]=[CX3H0]    | 0.0    |
| [CX4H2]([#6])[#6]                | 0.9994 | [CX2H0](#[CX2H1])[cX3H0]          | 0.0    |
| [CX4H3][CX4H2]                   | 0.9993 | C=CC=CC#C                         | 0.0    |
| [OX2H0]1[CX4H2][CX4H1]1          | 0.9983 | C=CCCC#C                          | 0.0    |
| [CX4H3][#6]                      | 0.9978 | CC=CCC#C                          | 0.0    |
| [#6H1]                           | 0.9924 | [CX3H0](=[CX3H1])([OX2H0])[CX2H0] | 0.0    |
| [#6H2][#6H1r3]                   | 0.9904 | [CX2H0](#[CX2H0])[CX2H0]          | 0.0    |
| [CX4H]O                          | 0.9852 | [CX4H3][nX3H0]                    | 0.0    |
| C1OC1                            | 0.985  | [#7][#6]=[#6][#6]#[#7]            | 0.0    |
|                                  | 0.9811 | [CX3H0](=[CX3H1])([CX4H2])[CX2H0] | 0.0    |
| worst negatives                  |        |                                   |        |
| [CX4H2]([CX4H3])[CX4H1]          | prob   | worst positives                   | prob   |
| [#8][#6H1][#6H1]                 | 0.7099 | [OX2H0][CX4H1][CX4H2][CX4H2]      | 0.4635 |
| [#6H1][#6H1]                     | 0.4617 | CCCCC                             | 0.5569 |
| [CX4H2][CX4H2][CX4H2][CX4H2]     | 0.4114 | [#6H1]([#6H2])[#6H2]              | 0.5649 |
| O[CX4H]([CX4H2])[CX4H1]          | 0.3018 | [CX4H2]([CX4H2])[CX4H2]           | 0.607  |
| [OX2H1]                          | 0.3017 | [CX4H2]([CX4H2])[CX4H1]           | 0.6125 |
| [#6X4H1][#6X4H1][#6X4H1]         | 0.2298 | [CX4H2]([CX4H3])[CX4H2]           | 0.639  |
| [CX4H1]([OX2H0])([CX4H2])[CX4H1] | 0.2169 | [OX2H0][CX4H2][CX4H1][CX4H2]      | 0.7261 |
| [CX4H2]([CH])[CH]                | 0.1329 | [CX4H2]([OX2H0])[CX4H1]           | 0.7728 |
|                                  | 0.1243 | [CX4H2](O)[CHX4]                  | 0.7802 |
|                                  | 0.1047 | [CX4H2][CX4H2]                    | 0.7905 |

---

Example 163 true smiles: CCC(=O)C(C)C formula: C6H12O  
 Index of correct structure: 0 of 193  
 True structure loss: 0.011109  
 True structure:

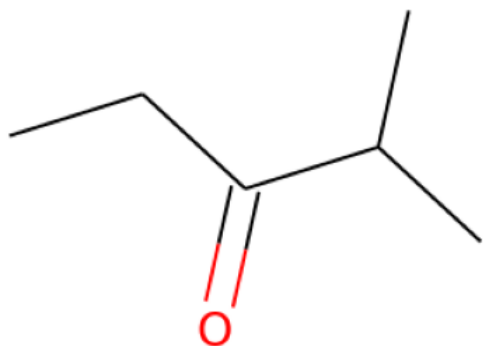

Experimental <sup>13</sup>C NMR (solvent: CDCl<sub>3</sub>)

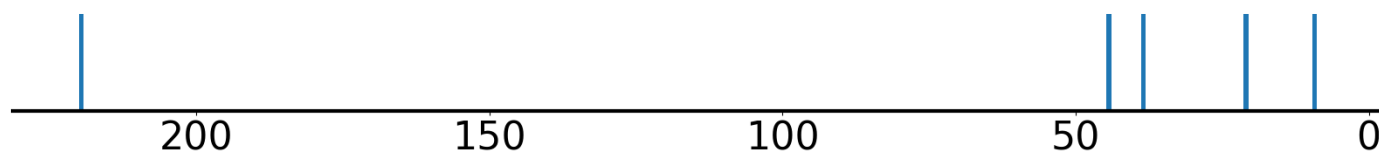

Experimental <sup>1</sup>H NMR (solvent: D<sub>2</sub>O)

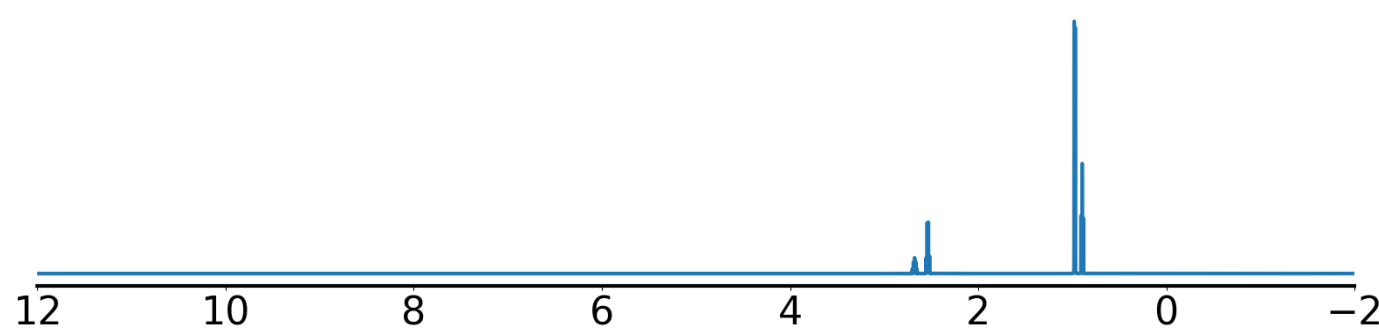

Top predicted structures (loss):

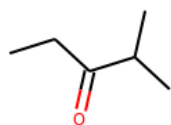

0.011109

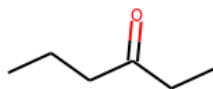

0.021622

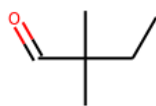

0.064929

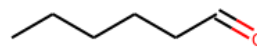

0.078475

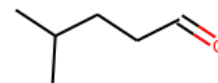

0.079066

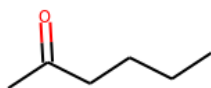

0.082231

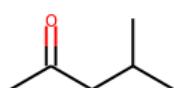

0.090535

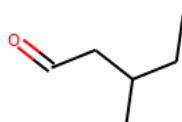

0.094392

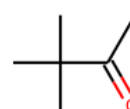

0.098022

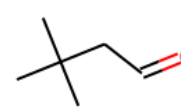

0.105171

Top predicted substructures  
[CX4H3]

prob  
 1.0

[OX1H0]=[CX3H0][CX4H2][CX4H3]

0.9893



|                                   |        |                                   |        |
|-----------------------------------|--------|-----------------------------------|--------|
| [CX3](=[OX1])C                    | 0.9998 | [CX4H3][CX4H2]                    | 0.976  |
| [#6H3][#6][#6]                    | 0.9998 | [CX4H2][CX3]=O                    | 0.9728 |
| [CX4H3][#6]                       | 0.9996 | [CX4H2]([CX4H3])[CX3H0]           | 0.9701 |
| [OX1H0]=[CX3H0]([#6])[CX4H2]      | 0.9937 | [CX4H2]([#6])[#6]                 | 0.9469 |
| best positives                    | prob   | best negatives                    | prob   |
| [CX4H3]                           | 1.0    | C=CCCC#C                          | 0.0    |
| [CX3](=[OX1])C                    | 0.9998 | [CX2H0](#[CX2H1])[CX3H0]          | 0.0    |
| [#6H3][#6][#6]                    | 0.9998 | C=CC=CC#C                         | 0.0    |
| [CX4H3][#6]                       | 0.9996 | [CX2H0](#[CX2H0])[CX2H0]          | 0.0    |
| [OX1H0]=[CX3H0]([#6])[CX4H2]      | 0.9937 | [CX2H0](#[CX2H1])[CX3H1]          | 0.0    |
| [OX1H0]=[CX3H0][CX4H2][CX4H3]     | 0.9893 | CCC#CC=C                          | 0.0    |
| [CX4H3][CX4H2]                    | 0.976  | CC=CCC#C                          | 0.0    |
| [CX4H2][CX3]=O                    | 0.9728 | #[7][#6]=[#6][#6][#6]=[#7]        | 0.0    |
| [CX4H2]([CX4H3])[CX3H0]           | 0.9701 | CCC=CC#C                          | 0.0    |
| [CX4H2]([#6])[#6]                 | 0.9469 | [CX2H1]#[CX2H0][CX3H1]=[CX3H0]    | 0.0    |
| worst negatives                   | prob   | worst positives                   | prob   |
| [CX4H2]CC=O                       | 0.6438 | [#6H1]                            | 0.3709 |
| O=[CX3H0][CX4H2][CX4H2]           | 0.592  | #[8]=[#6H0][#6H1]                 | 0.3781 |
| CCCCC                             | 0.5814 | O=[CX3][CX4H]                     | 0.3997 |
| #[6X3][#6][#6][#6H3]              | 0.544  | [CX4H3][CX4H1]                    | 0.7065 |
| [CX4H2]([CX4H2])[CX3H0]           | 0.4469 | [CX3H0](=[OX1H0])([CX4H2])[CX4H1] | 0.8291 |
| [CX4H2][CX4H2]                    | 0.3034 | [CHX4]([CH3X4])[CH3X4]            | 0.8738 |
| [CHX4]([CH3X4])[CH2X4]            | 0.2059 | [CX4H1]([CX4H3])([CX4H3])[CX3H0]  | 0.8744 |
| #[6H2][#6X3H0][#6H2]              | 0.1574 | #[6H3][#6][#6X3]                  | 0.9389 |
| [CX3H0](=[OX1H0])([CX4H2])[CX4H2] | 0.1299 | [CX4H2]([#6])[#6]                 | 0.9469 |
| #[6H3][#6][#6][#6H3]              | 0.128  | [CX4H2]([CX4H3])[CX3H0]           | 0.9701 |

---

Example 164 true smiles: COC(CN)OC formula: C4H11NO2  
 Index of correct structure: 0 of 181  
 True structure loss: 0.005701  
 True structure:

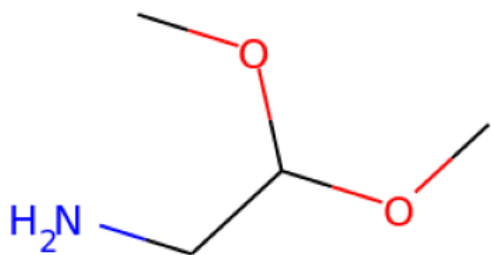

Experimental 13C NMR (solvent: CDCl3)

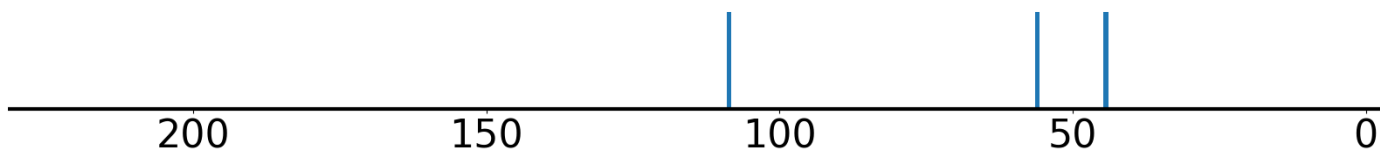

Experimental 1H NMR (solvent: CDCl3)

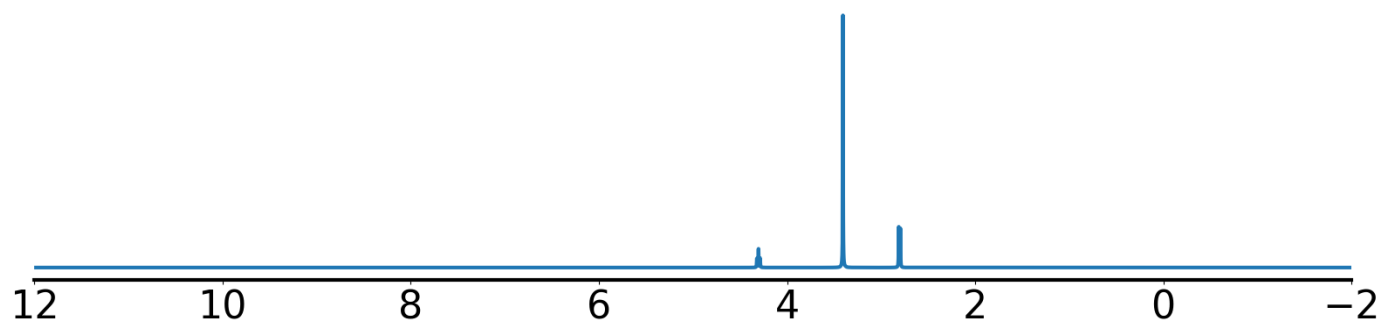

Top predicted structures (loss):

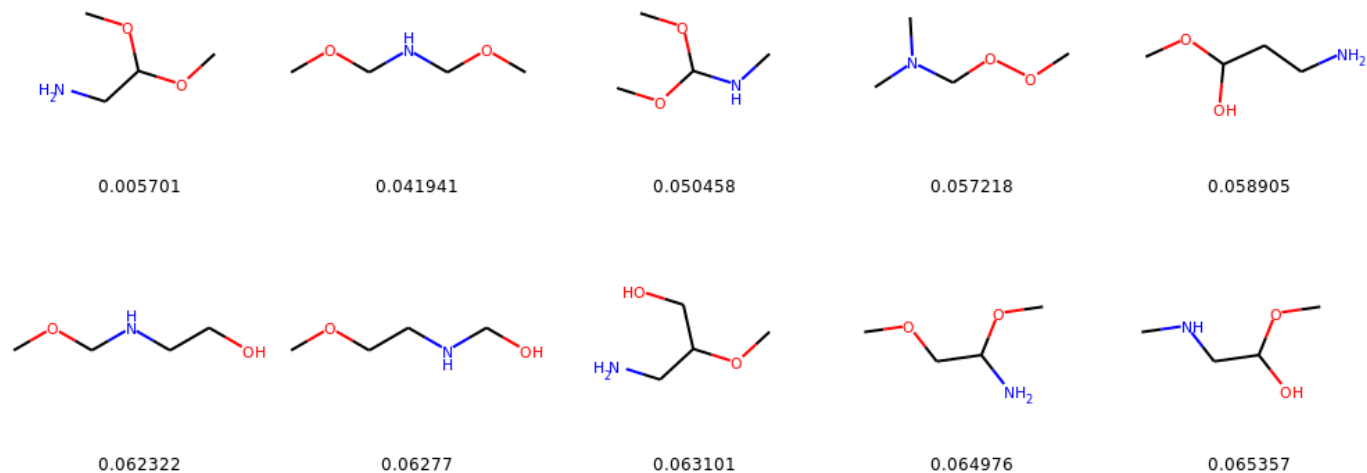

Top predicted substructures  
 [OX2H0][CX4H1][OX2H0]

prob  
 0.9996

[CX4H3]

0.9748

|                                  |        |                                |        |
|----------------------------------|--------|--------------------------------|--------|
| [#7H2][#6H2]                     | 0.9969 | [#7X3H2]                       | 0.9738 |
| [#7][#6H2]                       | 0.9935 | [CX4H3][OX2H0]                 | 0.9611 |
| [#7X3][#6H2]                     | 0.9909 | [#7][#6H2][#6H1]               | 0.8323 |
| [CX4H1]([OX2H0])([OX2H0])[CX4H2] | 0.9851 | [#8][#6][#6H2]                 | 0.8168 |
| best positives                   | prob   | best negatives                 | prob   |
| [OX2H0][CX4H1][OX2H0]            | 0.9996 | [#6X2][#6H1][#6X2]             | 0.0    |
| [#7H2][#6H2]                     | 0.9969 | CC=CCC#C                       | 0.0    |
| [#7][#6H2]                       | 0.9935 | [CX2H1]#[CX2H0][CX3H1]=[CX3H0] | 0.0    |
| [#7X3][#6H2]                     | 0.9909 | [OX1H0]=[CX3H0][CX2H0]#[CX2H1] | 0.0    |
| [CX4H1]([OX2H0])([OX2H0])[CX4H2] | 0.9851 | CCC#CC#C                       | 0.0    |
| [CX4H3]                          | 0.9748 | C=CC=CC#C                      | 0.0    |
| [#7X3H2]                         | 0.9738 | [CX2H0](#[CX2H1])[CX4H2]       | 0.0    |
| [CX4H3][OX2H0]                   | 0.9611 | [CX2H0](#[CX2H1])[CX3H0]       | 0.0    |
| [#7][#6H2][#6H1]                 | 0.8323 | [CX2H0](#[CX2H1])[CX2H0]       | 0.0    |
| [#8][#6][#6H2]                   | 0.8168 | [CX2H0](#[CX2H0])[CX2H0]       | 0.0    |
| worst negatives                  | prob   | worst positives                | prob   |
| OCC[CH2]                         | 0.3533 | [#6H1][#6H2]                   | 0.581  |
| [CX4H2]([NX3H2])[CX4H2]          | 0.3351 | [#6H1]                         | 0.6654 |
| [CX4H2][CX4H2]                   | 0.1797 | [CX4H2]([NX3H2])[CX4H1]        | 0.7087 |
| [#6H2][#7][#6H2]                 | 0.1736 | O[CX4H][CX4H2]                 | 0.7146 |
| [CX4H2]([#6])[O]                 | 0.1499 | [CX4H]O                        | 0.775  |
| [#7X3H1]                         | 0.1424 | [#8][#6][#6H2]                 | 0.8168 |
| [#6H2][#8][#6H1]                 | 0.1335 | [#7][#6H2][#6H1]               | 0.8323 |
| [#7][#6H2][#6H2]                 | 0.1166 | [CX4H3][OX2H0]                 | 0.9611 |
| [CX4H3][OX2H0][CX4H2]            | 0.0628 | [#7X3H2]                       | 0.9738 |
| [CX4H2](O)[CHX4]                 | 0.0599 | [CX4H3]                        | 0.9748 |

---

Example 165 true smiles: OCCNCCO formula: C4H11NO2  
 Index of correct structure: 0 of 181  
 True structure loss: 0.008394  
 True structure:

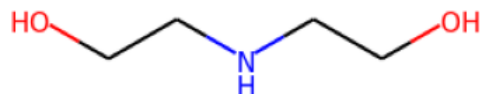

Experimental 13C NMR (solvent: CDCl3)

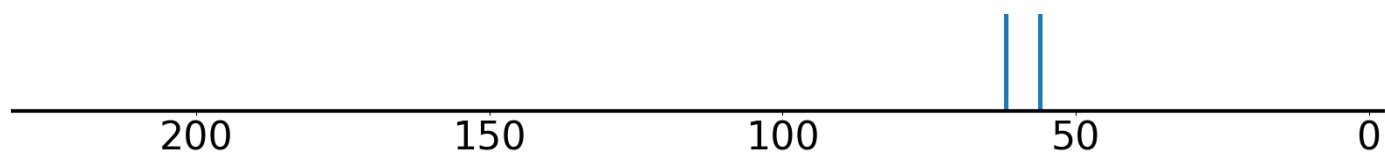

Experimental 1H NMR (solvent: D2O)

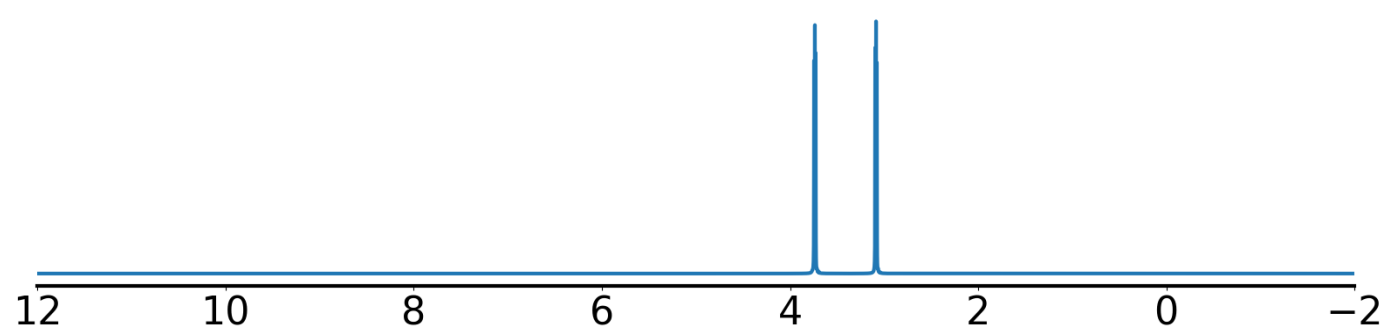

Top predicted structures (loss):

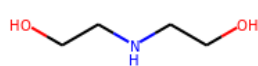

0.008394

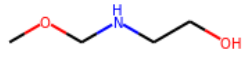

0.019748

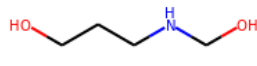

0.020764

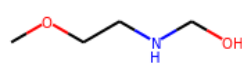

0.025876

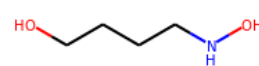

0.027609

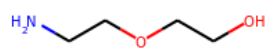

0.030531

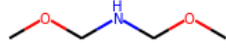

0.034585

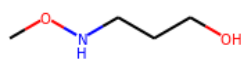

0.037962

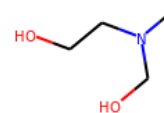

0.040601

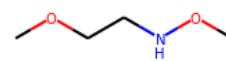

0.041126

Top predicted substructures  
 [#7][#6H2]

prob  
 0.9767

[CX4H2]([OX2H1])[CX4H2]

0.8669

|                         |        |                                   |        |
|-------------------------|--------|-----------------------------------|--------|
| [OX2H1]                 | 0.9684 | [#7][#6H2][#6H2]                  | 0.8593 |
| [#8][#6][#6H2]          | 0.9306 | [CH2X4](O)[CX4H2]                 | 0.7909 |
| [CX4H2]([#6])[O]        | 0.9222 | [CX4H2][CX4H2]                    | 0.7214 |
| [#7X3][#6H2]            | 0.9003 | [#6H2][#7][#6H2]                  | 0.6729 |
| best positives          | prob   | best negatives                    | prob   |
| [#7][#6H2]              | 0.9767 | [CX2H0](#[CX2H1])[cX3H0]          | 0.0    |
| [OX2H1]                 | 0.9684 | CCC=CC#C                          | 0.0    |
| [#8][#6][#6H2]          | 0.9306 | CC=CC#CC                          | 0.0    |
| [CX4H2]([#6])[O]        | 0.9222 | C=CC=CC#C                         | 0.0    |
| [#7X3][#6H2]            | 0.9003 | [CX3H0](=[CX3H1])([CX4H2])[CX2H0] | 0.0    |
| [CX4H2]([OX2H1])[CX4H2] | 0.8669 | CCC#CC=C                          | 0.0    |
| [#7][#6H2][#6H2]        | 0.8593 | [CX2H1]#[CX2H0][CX3H1]=[CX3H0]    | 0.0    |
| [CH2X4](O)[CX4H2]       | 0.7909 | C=CCCC#C                          | 0.0    |
| [CX4H2][CX4H2]          | 0.7214 | [CX3H0](=[CX3H1])([CX4H1])[CX2H0] | 0.0    |
| [#6H2][#7][#6H2]        | 0.6729 | [#6X2][#6H1][#6X2]                | 0.0    |
| worst negatives         | prob   | worst positives                   | prob   |
| [#6H1]                  | 0.3835 | [#7X3H1]                          | 0.247  |
| OCC[CH2]                | 0.3122 | [CX4H2]([NX3H1])[CX4H2]           | 0.4356 |
| [#7X3H2]                | 0.2735 | [#6H2][#7][#6H2]                  | 0.6729 |
| [CX4H2]([NX3H0])[CX4H2] | 0.2625 | [CX4H2][CX4H2]                    | 0.7214 |
| [#7X3H0]                | 0.2549 | [CH2X4](O)[CX4H2]                 | 0.7909 |
| [#7][#6H2][#6H1]        | 0.1802 | [#7][#6H2][#6H2]                  | 0.8593 |
| [#6H1][#6H2]            | 0.1761 | [CX4H2]([OX2H1])[CX4H2]           | 0.8669 |
| [CX4H2]([OX2H1])[CX4H1] | 0.1491 | [#7X3][#6H2]                      | 0.9003 |
| [#8][#6H1][#6H1]        | 0.131  | [CX4H2]([#6])[O]                  | 0.9222 |
| [#7H2][#6H1]            | 0.107  | [#8][#6][#6H2]                    | 0.9306 |

---

Example 166 true smiles: CC(N)(CO)CO formula: C4H11NO2  
 Index of correct structure: 0 of 181  
 True structure loss: 0.016605  
 True structure:

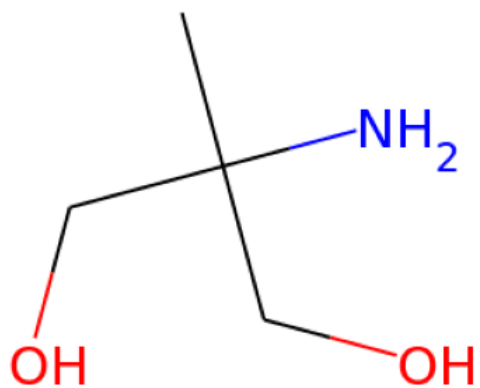

Experimental <sup>13</sup>C NMR (solvent: DMSO-d<sub>6</sub>)

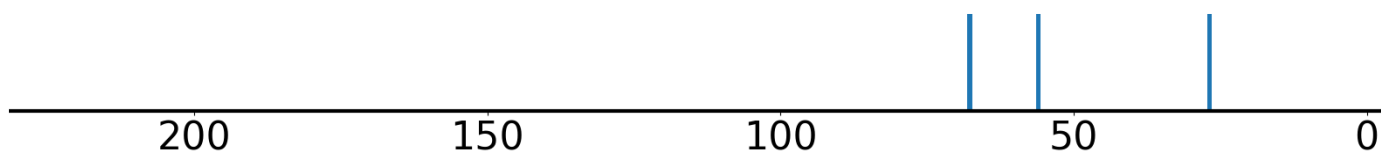

Experimental <sup>1</sup>H NMR (solvent: CDCl<sub>3</sub>)

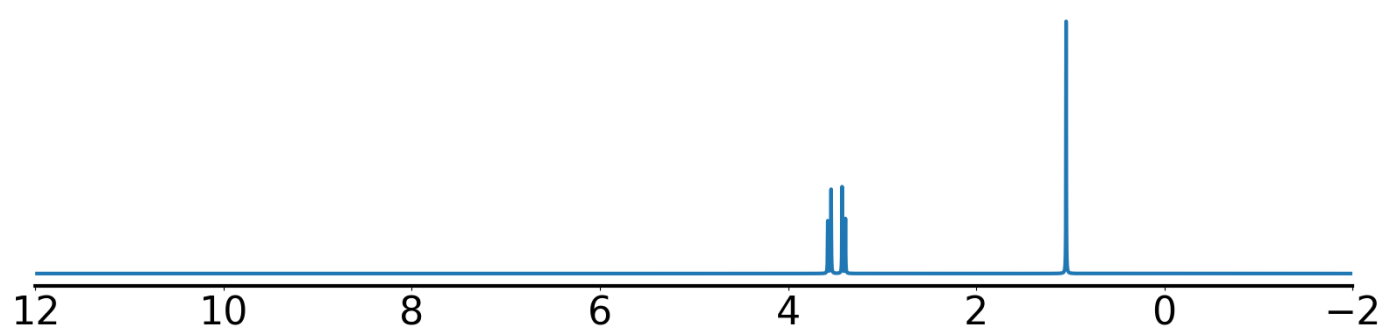

Top predicted structures (loss):

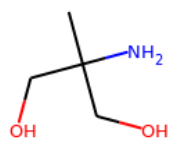

0.016605

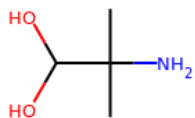

0.019313

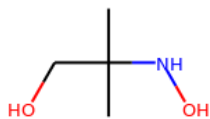

0.028744

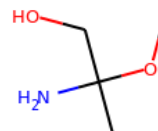

0.029283

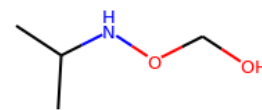

0.035906

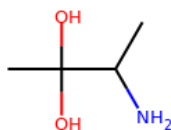

0.039362

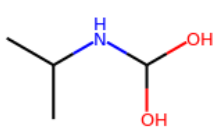

0.040474

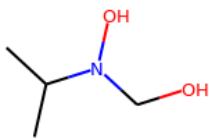

0.042909

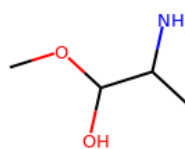

0.043992

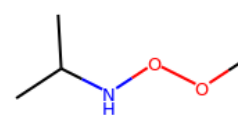

0.044442

Top predicted substructures  
 [#6H3][#6][#6]

prob  
 0.9992

[CX4H3][#6]

0.9544

|                         |        |                                   |        |
|-------------------------|--------|-----------------------------------|--------|
| [OX2H1]                 | 0.9986 | [#7X3H2]                          | 0.9377 |
| [CX4H3]                 | 0.998  | [CX4H2]([OX2H1])[CX4H0]           | 0.9033 |
| [#6H3][#6H0]            | 0.9711 | [CH3]CC[OH]                       | 0.8724 |
| [CX4H3][CX4H0]          | 0.9568 | [#6H1]                            | 0.7673 |
| best positives          | prob   | best negatives                    | prob   |
| [#6H3][#6][#6]          | 0.9992 | [CX2H1]#[CX2H0][CX3H1]=[CX3H0]    | 0.0    |
| [OX2H1]                 | 0.9986 | C=CCCC#C                          | 0.0    |
| [CX4H3]                 | 0.998  | CCC=CC#C                          | 0.0    |
| [#6H3][#6H0]            | 0.9711 | CC=CC#CC                          | 0.0    |
| [CX4H3][CX4H0]          | 0.9568 | C=CC=CC#C                         | 0.0    |
| [CX4H3][#6]             | 0.9544 | CCC#CC=C                          | 0.0    |
| [#7X3H2]                | 0.9377 | [CX3H0](=[CX3H1])([CX4H2])[CX2H0] | 0.0    |
| [CX4H2]([OX2H1])[CX4H0] | 0.9033 | CC=CCC#C                          | 0.0    |
| [CH3]CC[OH]             | 0.8724 | CC#CCC=C                          | 0.0    |
| [#7][#6][#6H3]          | 0.6764 | [CX2H0](#[CX2H1])[CX4H2]          | 0.0    |
| worst negatives         | prob   | worst positives                   | prob   |
| [#6H1]                  | 0.7673 | [#8][#6H2][#6H0][#6H2][#8]        | 0.2105 |
| [OH][CX4H]              | 0.7577 | [#6H3][#6H0]([#6H2])[#6H2]        | 0.3025 |
| [#7H2][#6H1]            | 0.554  | [#7H2][#6H0]                      | 0.3644 |
| [CX4H2]([OX2H1])[CX4H1] | 0.4928 | OCC[CH2]                          | 0.5283 |
| [CX4H]O                 | 0.4697 | [CX4H2]([#6])[O]                  | 0.5446 |
| [#8H][#6H2][#6H1]       | 0.3081 | [#7][#6][#6H3]                    | 0.6764 |
| [#6H1][#6H2]            | 0.2533 | [CH3]CC[OH]                       | 0.8724 |
| [#7X3H1]                | 0.252  | [CX4H2]([OX2H1])[CX4H0]           | 0.9033 |
| [#7X3][#6H2]            | 0.2324 | [#7X3H2]                          | 0.9377 |
| [#8][#6][#6][#8]        | 0.2322 | [CX4H3][#6]                       | 0.9544 |

---

Example 167 true smiles: CC(O)CC(=O)O formula: C4H8O3  
 Index of correct structure: 0 of 172  
 True structure loss: 0.019179  
 True structure:

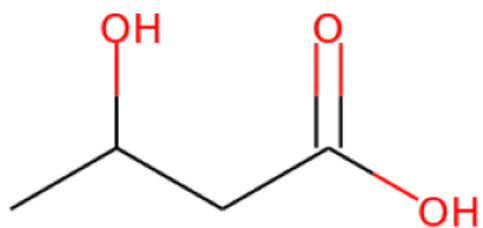

Experimental <sup>13</sup>C NMR (solvent: CDCl<sub>3</sub>)

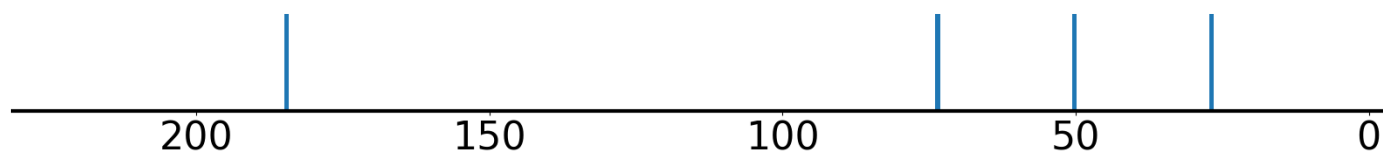

Experimental <sup>1</sup>H NMR (solvent: D<sub>2</sub>O)

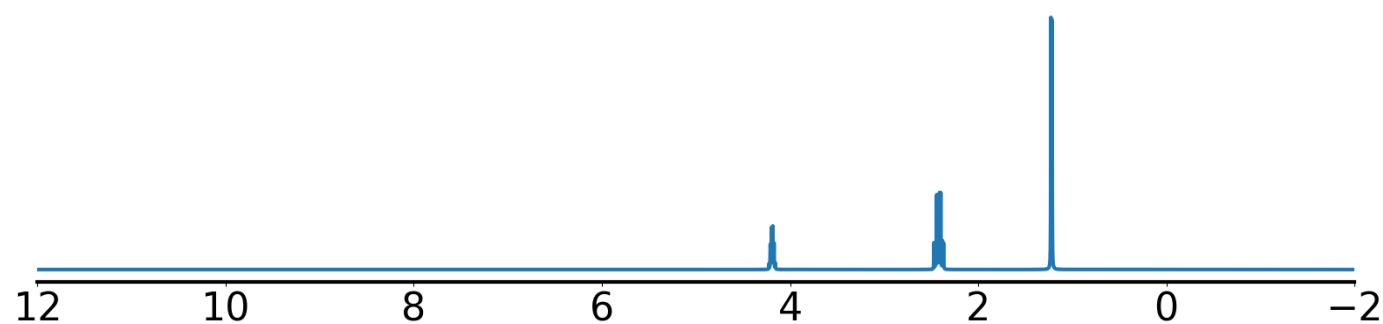

Top predicted structures (loss):

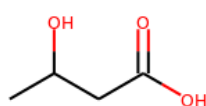

0.019179

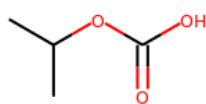

0.060651

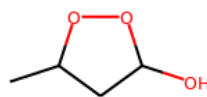

0.061101

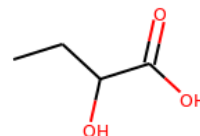

0.065334

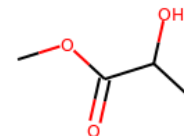

0.068097

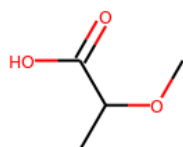

0.075476

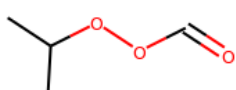

0.084514

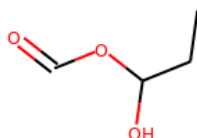

0.086433

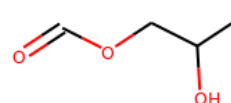

0.087185

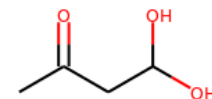

0.093735

Top predicted substructures  
 [CX4H3]

prob  
 1.0

[CX4H3][#6]

0.995



|                                   |        |                                   |        |
|-----------------------------------|--------|-----------------------------------|--------|
| [#6H3][#6][#6]                    | 0.9996 | [#6H1]                            | 0.9888 |
| [CX3](=[OX1])C                    | 0.9988 | [#8]=[#6][#8]                     | 0.9872 |
| [OX2H1]                           | 0.9985 | [CX4H]O                           | 0.9811 |
| [CX4H2]([#6])[#6]                 | 0.9971 | [CX3](=[OX1])O                    | 0.9754 |
| best positives                    | prob   | best negatives                    | prob   |
| [CX4H3]                           | 1.0    | CC=CC#CC                          | 0.0    |
| [#6H3][#6][#6]                    | 0.9996 | [CX2H1]#[CX2H0][CX3H1]=[CX3H0]    | 0.0    |
| [CX3](=[OX1])C                    | 0.9988 | CC=CCC#C                          | 0.0    |
| [OX2H1]                           | 0.9985 | CCC#CC#C                          | 0.0    |
| [CX4H2]([#6])[#6]                 | 0.9971 | [#6X2][#6H1][#6X2]                | 0.0    |
| [CX4H3][#6]                       | 0.995  | CCC=CC#C                          | 0.0    |
| [#6H1]                            | 0.9888 | C=CC=CC#C                         | 0.0    |
| [#8]=[#6][#8]                     | 0.9872 | [CX3H1](=[CX3H1])[CX2H0]          | 0.0    |
| [CX4H]O                           | 0.9811 | [CX2H0]([#CX2H0])[CX2H0]          | 0.0    |
| [CX3](=[OX1])O                    | 0.9754 | CC#CCC#C                          | 0.0    |
| worst negatives                   | prob   | worst positives                   | prob   |
| [#8][#6H0][#6H1]                  | 0.6222 | [CX3H0](=[OX1H0])([OX2H1])[CX4H2] | 0.2133 |
| [CX3H0](=[OX1H0])([OX2H1])[CX4H1] | 0.5987 | [OX1H0]=[CX3H0]([#8])[CX4H2]      | 0.2865 |
| [CX4H2]CC=O                       | 0.5706 | [#8]=[#6][#6H2][#6H1]             | 0.4054 |
| [#8]=[#6H0][#6H1]                 | 0.5622 | [#6X3][#6][#6][#6H3]              | 0.5263 |
| OCC[CH2]                          | 0.465  | [CX4H2][CX3]=O                    | 0.5303 |
| O=[CX3][CX4H]                     | 0.4505 | O=[CX3H0][CX4H2][CX4H1]           | 0.5886 |
| [#8][#6H1][#6H1]                  | 0.4225 | [CHX4]([CH3X4])[CH2X4]            | 0.6628 |
| [#8][#6][#6][#6][#6]=[#8]         | 0.3818 | [CX4H1]([OX2H1])([CX4H3])[CX4H2]  | 0.6678 |
| [CH3]CC[OH]                       | 0.3735 | [CX4H2]([CX4H1])[CX3H0]           | 0.6758 |
| [CX4H2]([CH])[CH]                 | 0.315  | [#8][#6][#6][#6X3]                | 0.7748 |

---

Example 168 true smiles: O=C1C=CC(=O)C=C1 formula: C6H4O2  
 Index of correct structure: 0 of 160  
 True structure loss: 0.018842  
 True structure:

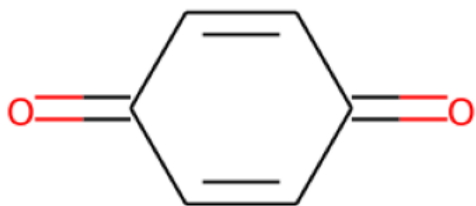

Experimental <sup>13</sup>C NMR (solvent: CDCl<sub>3</sub>)

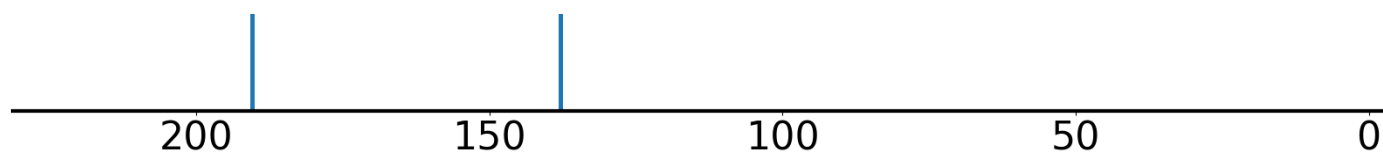

Experimental <sup>1</sup>H NMR (solvent: D<sub>2</sub>O)

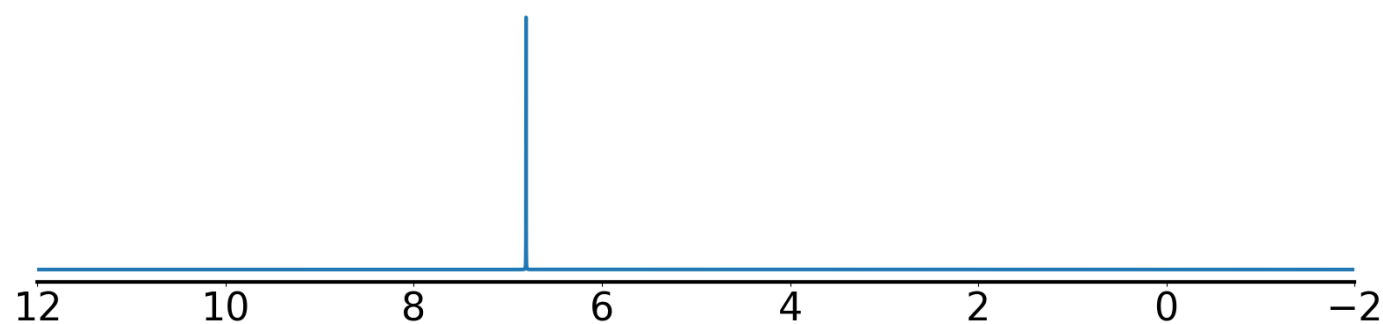

Top predicted structures (loss):

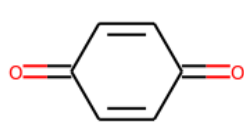

0.018842

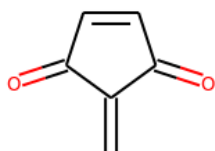

0.03608

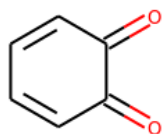

0.048474

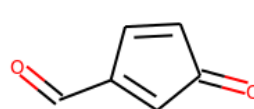

0.056781

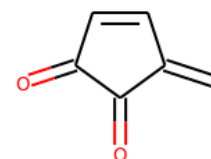

0.058536

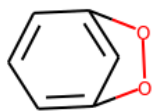

0.061837

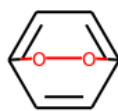

0.065505

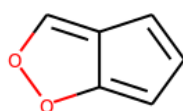

0.066052

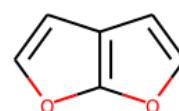

0.069136

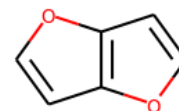

0.069346

Top predicted substructures  
 [#6X3][#6X3]

prob  
 0.9888

[#6X3][#6X3][#6X3]=[#6X3]

0.8337

|                                |        |                                           |        |
|--------------------------------|--------|-------------------------------------------|--------|
| O=[#6][#6]=[#6X3]              | 0.9266 | [#6X3H1][#6X3H0]                          | 0.8331 |
| [CX3](=[OX1])C                 | 0.9264 | [OX1H0]=[CX3H0][CX3H1]=[CX3H1]            | 0.8195 |
| [#8]=[#6][#6]=[#6][#6]=[#8]    | 0.8614 | [#6H1]                                    | 0.8038 |
| O=C[CX3H]                      | 0.8553 | [CX3H0][CX3H1]=[CX3H1][CX3H0]             | 0.774  |
| best positives                 | prob   | best negatives                            | prob   |
| [#6X3][#6X3]                   | 0.9888 | [#6H3][#7][#6X4H1][#6H3]                  | 0.0    |
| O=[#6][#6]=[#6X3]              | 0.9266 | [CX4H2]([NX3H1])[CX4H3]                   | 0.0    |
| [CX3](=[OX1])C                 | 0.9264 | [CX4H1]([NX3H1])([CX4H3])[CX4H2]          | 0.0    |
| [#8]=[#6][#6]=[#6][#6]=[#8]    | 0.8614 | [CX4H1]([NX3H0])([CX4H3])[CX4H1]          | 0.0    |
| O=C[CX3H]                      | 0.8553 | [CX4H1]([NX3H2])([CX4H3])[CX4H1]          | 0.0    |
| [#6X3][#6X3][#6X3]=[#6X3]      | 0.8337 | [CX4H1]([NX3H1])([CX4H3])[CX4H1]          | 0.0    |
| [#6X3H1][#6X3H0]               | 0.8331 | [CX4H0]([OX2H1])([CX4H3])([CX4H2])[CX4H1] | 0.0    |
| [OX1H0]=[CX3H0][CX3H1]=[CX3H1] | 0.8195 | [CX4H0]([NX3H1])([CX4H3])([CX4H2])[CX4H1] | 0.0    |
| [#6H1]                         | 0.8038 | [#6H3][#6H1][#6H1]=[#7]                   | 0.0    |
| [CX3H0][CX3H1]=[CX3H1][CX3H0]  | 0.774  | [CX4H1]([NX3H2])([CX4H2])[CX3H1]          | 0.0    |
| worst negatives                | prob   | worst positives                           | prob   |
| O=[#6][#6][#6X3]               | 0.7434 | [#6X3H1]=[#6X3H1][#6X3H0][#6X3H1]         | 0.0869 |
| [#6X3][#6X3][#6X3][#6X3]       | 0.6991 | CCC=CCC                                   | 0.5204 |
| O=CC=O                         | 0.38   | [CHX3]=[CHX3]                             | 0.5284 |
| [#8]=[#6][#6]=[#8]             | 0.3372 | CC=CCC=C                                  | 0.5605 |
| [cH]                           | 0.3148 | [CHX3](=C)C                               | 0.5863 |
| [#6]1[#6][#6][#6][#6][#6]1     | 0.2821 | [#6]1[#6]=[#6][#6][#6]=[#6]1              | 0.6332 |
| [#8]=[#6][#6][#6][#6]=[#8]     | 0.2751 | [CX3H1](=[CX3H1])[CX3H0]                  | 0.6345 |
| [CX3H2]=[CX3H0][CX3H0]         | 0.2598 | [#8]=[#6H0][#6H1]                         | 0.6419 |
| [#8][#6][#6][#6X3]             | 0.2581 | [#8]=[#6][#6H1]=[#6H1]                    | 0.7204 |
| [#6H1][#6H1]                   | 0.2391 | [#6X3][#6X3]=[#6X3][#6X3]                 | 0.7419 |

---

Example 169 true smiles: CC(C)(C)C#N formula: C5H9N  
 Index of correct structure: 0 of 125  
 True structure loss: 0.006086  
 True structure:

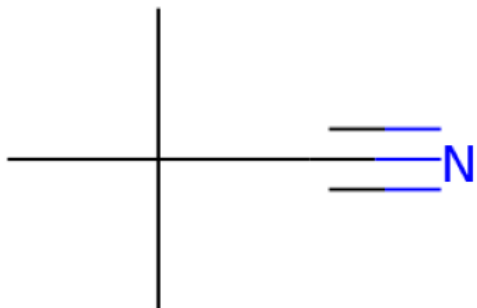

Experimental <sup>13</sup>C NMR (solvent: CDCl<sub>3</sub>)

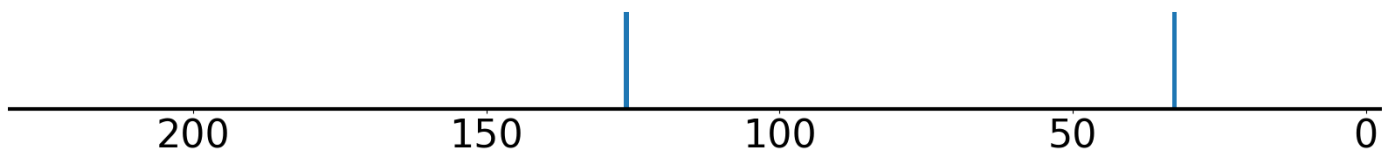

Experimental <sup>1</sup>H NMR (solvent: CDCl<sub>3</sub>)

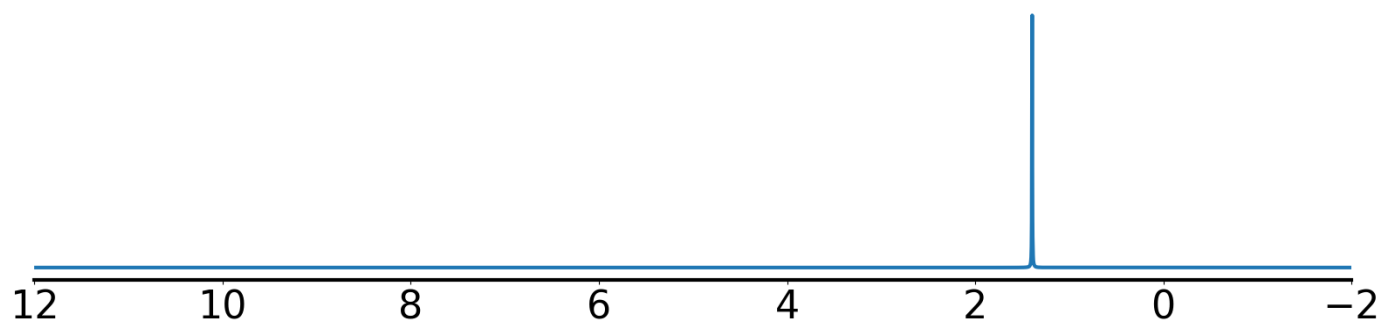

Top predicted structures (loss):

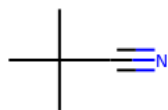

0.006086

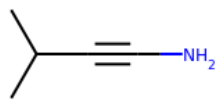

0.05987

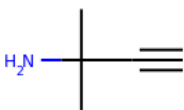

0.060118

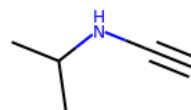

0.062975

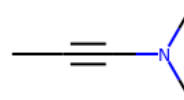

0.070877

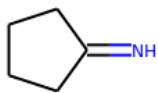

0.074554

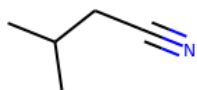

0.07724

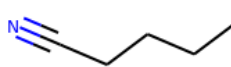

0.079697

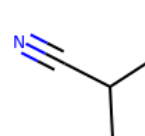

0.084828

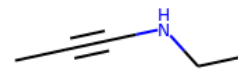

0.085141

Top predicted substructures  
 [CX4H3][CX4H0][CX4H3]

prob  
 0.9822

[CX4]([CX4H3])([CX4H3])[CX4H3]

0.8008

|                                |        |                                        |        |
|--------------------------------|--------|----------------------------------------|--------|
| [CX2H0] (#[NX1H0])[CX4H0]      | 0.9328 | [CX4H3]                                | 0.788  |
| [CX4H3][#6]                    | 0.8335 | [#6]#[#7]                              | 0.7521 |
| [CX4H3][CX4H0]                 | 0.8198 | [#6H3][#6H0]                           | 0.741  |
| [#6H3][#6][#6]                 | 0.8108 | [#6H1]                                 | 0.3413 |
| best positives                 | prob   | best negatives                         | prob   |
| [CX4H3][CX4H0][CX4H3]          | 0.9822 | [OX2H0]1[CX4H2][CX4H2][CX4H1][CX4H1]1  | 0.0    |
| [CX2H0] (#[NX1H0])[CX4H0]      | 0.9328 | [OX1H0]=[CX3H0]1[CX4H1][CX4H1][CX4H2]1 | 0.0    |
| [CX4H3][#6]                    | 0.8335 | [OX2H0]1[CX4H2][CX4H1][CX4H1]1         | 0.0    |
| [CX4H3][CX4H0]                 | 0.8198 | [#8][#6H1][#6H2][#6H1]=[#8]            | 0.0    |
| [#6H3][#6][#6]                 | 0.8108 | [OX2H1][CX4H2][CX4H1]([OX2H0])[CX4H1]  | 0.0    |
| [CX4]([CX4H3])([CX4H3])[CX4H3] | 0.8008 | [OX2H0][CX4H2][CX4H2][CX4H1][OX2H0]    | 0.0    |
| [CX4H3]                        | 0.788  | [OX2H1][CX4H1]1[CX4H1][CX4H2][CX4H1]1  | 0.0    |
| [#6]#[#7]                      | 0.7521 | [CX3H0](=[CX3H2])([OX2H0])[CX3H0]      | 0.0    |
| [#6H3][#6H0]                   | 0.741  | [OX2H0][CX4H2][CX4H1]([CX4H1])[CX4H3]  | 0.0    |
| worst negatives                | prob   | worst positives                        | prob   |
| [#6H1]                         | 0.3413 | [#6H3][#6H0]                           | 0.741  |
| [#7X3H1]                       | 0.2462 | [#6]#[#7]                              | 0.7521 |
| [#7X3H2]                       | 0.2325 | [CX4H3]                                | 0.788  |
| [CX4H2][CX4H2]                 | 0.2317 | [CX4]([CX4H3])([CX4H3])[CX4H3]         | 0.8008 |
| [CHX3]=[CHX3]                  | 0.1879 | [#6H3][#6][#6]                         | 0.8108 |
| [#7H2][#6H0]                   | 0.1472 | [CX4H3][CX4H0]                         | 0.8198 |
| [#7][#6H0][#6H1]               | 0.1214 | [CX4H3][#6]                            | 0.8335 |
| [#6H2][#7][#6H2]               | 0.1136 | [CX2H0] (#[NX1H0])[CX4H0]              | 0.9328 |
| [#7][#6H2]                     | 0.1089 | [CX4H3][CX4H0][CX4H3]                  | 0.9822 |

---

Example 170 true smiles: N#Cc1ccccc1 formula: C7H5N  
 Index of correct structure: 0 of 121  
 True structure loss: 0.012092  
 True structure:

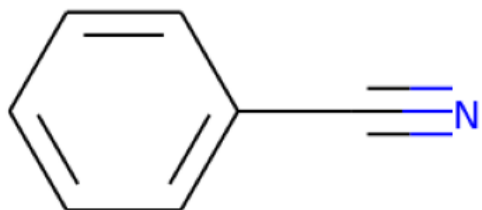

Experimental <sup>13</sup>C NMR (solvent: CDCl<sub>3</sub>)

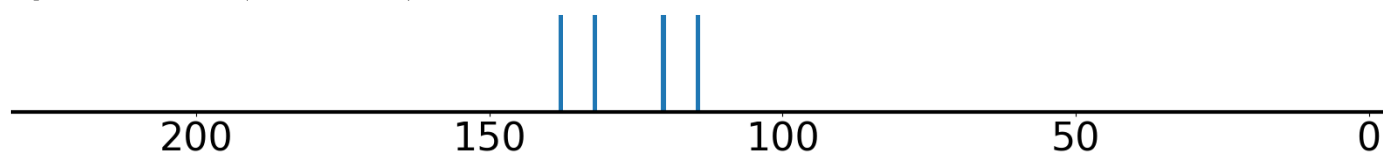

Experimental <sup>1</sup>H NMR (solvent: CD<sub>3</sub>OD)

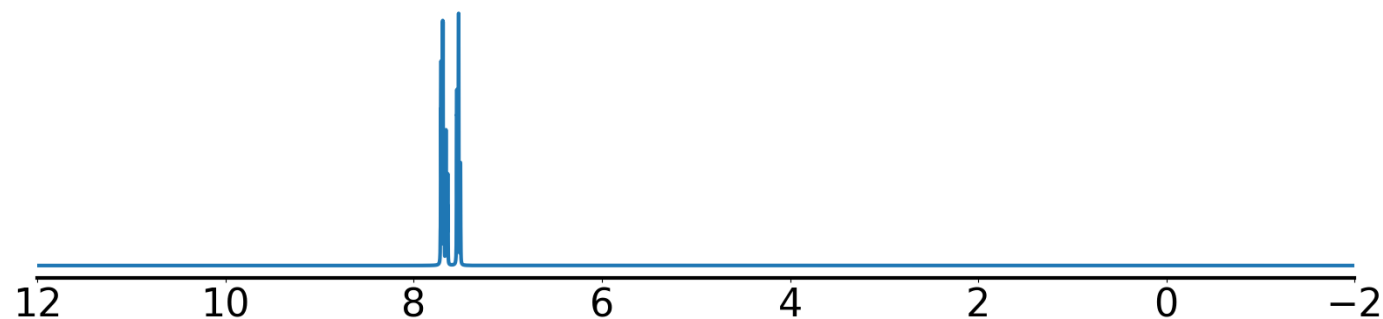

Top predicted structures (loss):

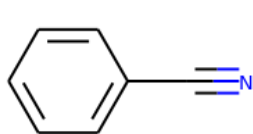

0.012092

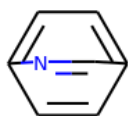

0.018296

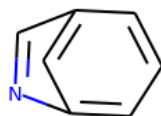

0.051488

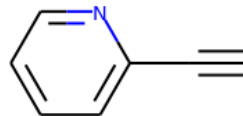

0.060653

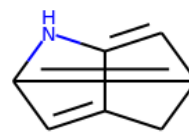

0.061253

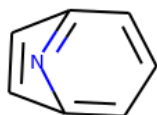

0.061892

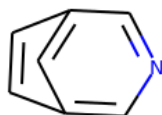

0.064748

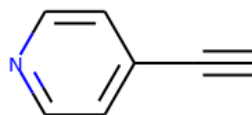

0.066741

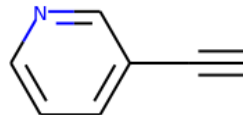

0.068065

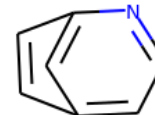

0.075339

Top predicted substructures  
 [#6H1]  
 [#6X3][#6X3]  
 [#6X3][#6X3][#6X3][#6X3]

prob  
 0.9992  
 0.9988  
 0.9985

[#6X3H1][#6X3H0]  
 [cX3H1](cX3H1)[cX3H0]  
 [#6H1][#6H1]

0.9834  
 0.9803  
 0.9606

|                            |        |                                           |        |
|----------------------------|--------|-------------------------------------------|--------|
| [cH][cH]                   | 0.9924 | [#6]1[#6][#6][#6][#6]1                    | 0.9276 |
| [cH]                       | 0.9912 | [cX3H1]([cX3H1])[cX3H1]                   | 0.8954 |
| best positives             | prob   | best negatives                            | prob   |
| [#6H1]                     | 0.9992 | [#8][#6H1][#6H2][#6H1]=[#8]               | 0.0    |
| [#6X3][#6X3]               | 0.9988 | [CX4H0]([OX2H0])([CX4H3])([CX4H2])[CX4H1] | 0.0    |
| [#6X3][#6X3][#6X3][#6X3]   | 0.9985 | [OX2H0][CX4H2][CX4H0][OX2H0]              | 0.0    |
| [cH][cH]                   | 0.9924 | [OX2H0]1[CX4H2][CX4H2][CX4H1][CX4H1]1     | 0.0    |
| [cH]                       | 0.9912 | [OX2H0][CX4H2][CX4H2][CX4H1][OX2H0]       | 0.0    |
| [#6X3H1][#6X3H0]           | 0.9834 | [CX4H1]([OX2H0])([CX4H3])[CX4H0]          | 0.0    |
| [cX3H1]([cX3H1])[cX3H0]    | 0.9803 | [OX2H1][CX4H1][CX4H1]([CX4H1])[CX4H1]     | 0.0    |
| [#6H1][#6H1]               | 0.9606 | [OX1H0]=[CX3H0]1[CX4H1][CX4H1][CX4H2]1    | 0.0    |
| [#6]1[#6][#6][#6][#6]1     | 0.9276 | [OX2H0][CX4H2][CX4H1]([CX4H1])[CX4H1]     | 0.0    |
| [cX3H1]([cX3H1])[cX3H1]    | 0.8954 | [OX2H1][CX4H2][CX4H1]([CX4H2])[CX4H2]     | 0.0    |
| worst negatives            | prob   | worst positives                           | prob   |
| [#7][#6][#6X3]             | 0.7941 | [#7]#[#6][#6X3]                           | 0.5001 |
| [#7][#6][#6][#6X3]         | 0.7814 | [#6]#[#7]                                 | 0.5505 |
| [#7][#6X3H0][#6X3H1]       | 0.5595 | [#7]#[#6][#6][#6X3]                       | 0.556  |
| [#7][#6H0][#6H1]           | 0.5407 | [#6X3H1][#6X3H1][#6X3H0][#6X3H1]          | 0.7164 |
| [#6]1[#6][#6][#6][#6][#7]1 | 0.4889 | [cX3H1]([cX3H1])[cX3H1]                   | 0.8954 |
| [#6X3][#7][#6X3]           | 0.4874 | [#6]1[#6][#6][#6][#6][#6]1                | 0.9276 |
| [#6]1[#6][#6][#6][#7]1     | 0.3077 | [#6H1][#6H1]                              | 0.9606 |
| [#7H][#6X3H1]              | 0.2102 | [cX3H1]([cX3H1])[cX3H0]                   | 0.9803 |
| [cX3H1]([cX3H1])[cX3H1]    | 0.1785 | [#6X3H1][#6X3H0]                          | 0.9834 |
| [#6X3][#7X3][#6X3]         | 0.1699 | [cH]                                      | 0.9912 |

---

Example 171 true smiles: CN1CCCC1 formula: C5H11N  
 Index of correct structure: 0 of 100  
 True structure loss: 0.014178  
 True structure:

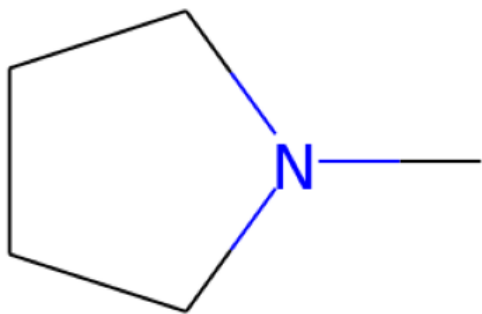

Experimental <sup>13</sup>C NMR (solvent: CDCl<sub>3</sub>)

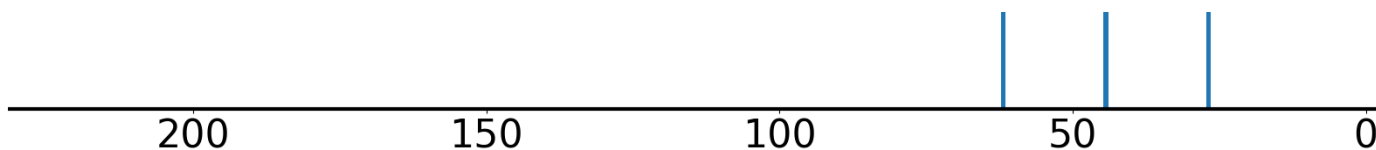

Experimental <sup>1</sup>H NMR (solvent: CDCl<sub>3</sub>)

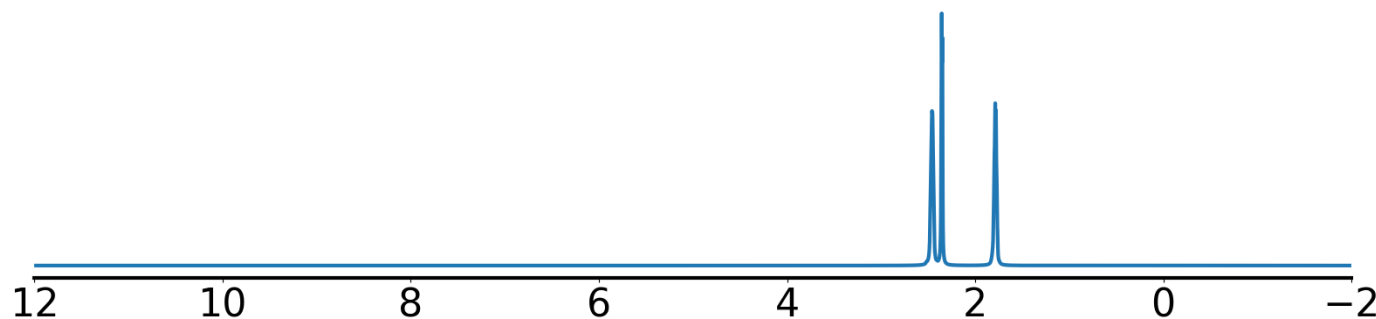

Top predicted structures (loss):

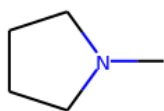

0.014178

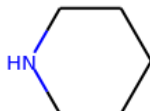

0.027459

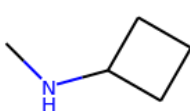

0.04011

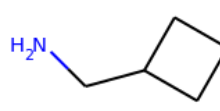

0.045611

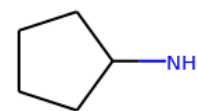

0.048858

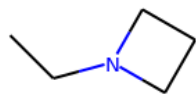

0.052041

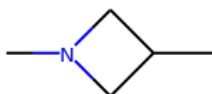

0.060631

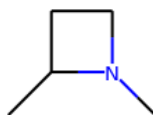

0.065502

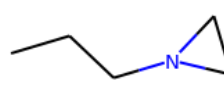

0.066835

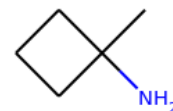

0.069255

Top predicted substructures  
 [CX4H2]([#6])[#6]  
 [#7X3H0]  
 [CX4H2]([NX3H0])[CX4H2]

prob  
 0.9994  
 0.8612  
 0.8396

[CX4H3][NX3H0]  
 [#6H3][#7]  
 [#7][#6H2][#6H2]

0.7773  
 0.7577  
 0.752



|                                |        |                                   |        |
|--------------------------------|--------|-----------------------------------|--------|
| [CX4H2][CX4H2]                 | 0.8359 | [#6H3][#7X3H0][#6X4H2][#6X4H2]    | 0.7393 |
| [#7X3][#6H3]                   | 0.8244 | [CX4H2]([CX4H2])[CX4H2]           | 0.727  |
| best positives                 | prob   | best negatives                    | prob   |
| [CX4H2]([#6])[#6]              | 0.9994 | [CX2H0](#[CX2H1])[cX3H0]          | 0.0    |
| [#7X3H0]                       | 0.8612 | [CX2H1]#[CX2H0][CX3H1]=[CX3H0]    | 0.0    |
| [CX4H2]([NX3H0])[CX4H2]        | 0.8396 | [cX3H0][cX3H1][cX3H0][OX2H1]      | 0.0    |
| [CX4H2][CX4H2]                 | 0.8359 | C=CC=CC#C                         | 0.0    |
| [#7X3][#6H3]                   | 0.8244 | [OX2H0][CX3H1]=[#6X3H0][#8X2H0]   | 0.0    |
| [CX4H3][NX3H0]                 | 0.7773 | [CX4H1]([OX2H0])([CX4H3])[CX3H0]  | 0.0    |
| [#6H3][#7]                     | 0.7577 | [CX3H0](=[CX3H1])([OX2H0])[CX2H0] | 0.0    |
| [#7][#6H2][#6H2]               | 0.752  | [OX2H0r5][CX4H2][OX2H0r5]         | 0.0    |
| [#6H3][#7X3H0][#6X4H2][#6X4H2] | 0.7393 | [CX3H0](=[CX3H2])([CX4H1])[CX3H1] | 0.0    |
| [CX4H2]([CX4H2])[CX4H2]        | 0.727  | [cX3H0]([cX3H1])([cX3H0])[OX2H1]  | 0.0    |
| worst negatives                | prob   | worst positives                   | prob   |
| [#6H1][#6H2]                   | 0.5697 | [#6]1[#6][#6][#6][#7]1            | 0.1489 |
| [#7X3H2]                       | 0.3576 | [CX4H3]                           | 0.2449 |
| C1CCC1                         | 0.2572 | [#6H2][#7][#6H2]                  | 0.2926 |
| [#6H1]                         | 0.2456 | [#6H3][#7][#6H2]                  | 0.4922 |
| [#7X3H1]                       | 0.2283 | [#7X3][#6H2]                      | 0.5065 |
| [#6H1]([#6H2])[#6H2]           | 0.173  | [CX4H2][CX4H2][CX4H2][CX4H2]      | 0.6648 |
| CCCCC                          | 0.1713 | [#7][#6H2]                        | 0.7116 |
| [#7][#6H1][#6H2r5]             | 0.1611 | [CX4H2]([CX4H2])[CX4H2]           | 0.727  |
| [CX4H2]([NX3H2])[CX4H2]        | 0.1259 | [#6H3][#7X3H0][#6X4H2][#6X4H2]    | 0.7393 |
| [CX4H2]([CX4H2])[CX4H1]        | 0.1252 | [#7][#6H2][#6H2]                  | 0.752  |

---

Example 172 true smiles: Oc1ccccc1 formula: C6H6O  
 Index of correct structure: 0 of 98  
 True structure loss: 0.005278  
 True structure:

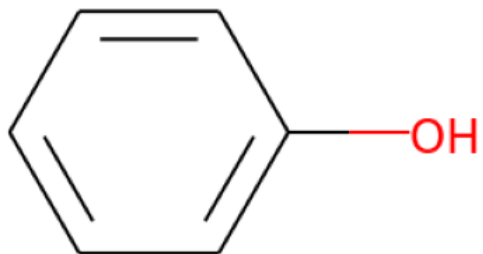

Experimental 13C NMR (solvent: CDCl3)

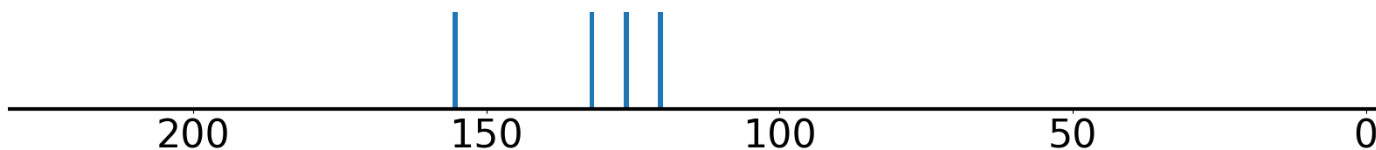

Experimental 1H NMR (solvent: D2O)

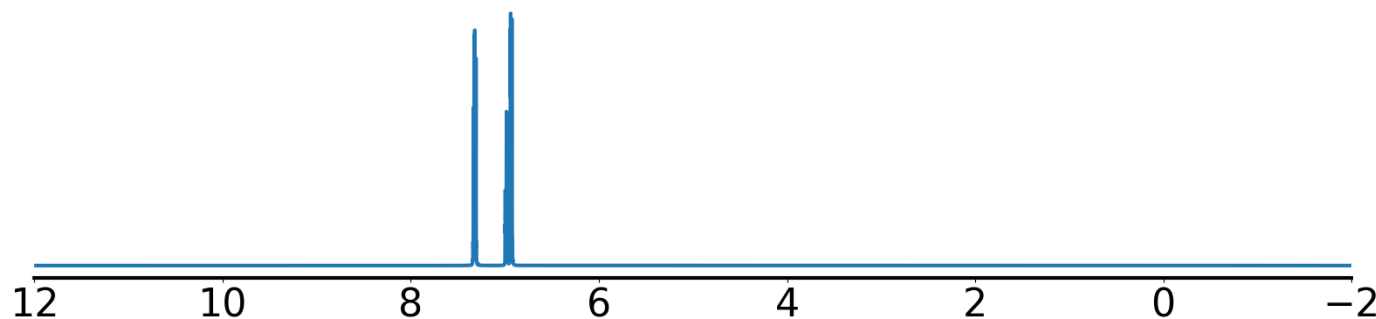

Top predicted structures (loss):

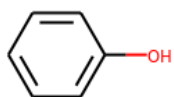

0.005278

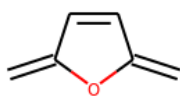

0.046617

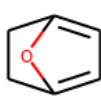

0.057299

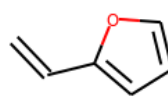

0.06161

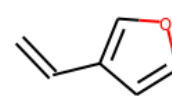

0.08174

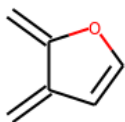

0.083112

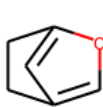

0.104978

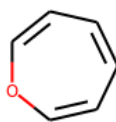

0.13359

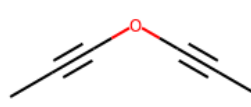

0.148344

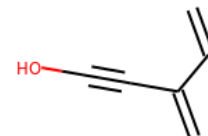

0.166134

Top predicted substructures  
 [#6X3][#6X3]  
 [#6X3][#6X3][#6X3][#6X3]  
 [cH][cH]

prob  
 0.9998  
 0.9997  
 0.9991

[cX3H1]([cX3H1])[cX3H0]  
 [#6X3H1][#6X3H0]  
 [#6]1[#6][#6][#6][#6]1

0.9851  
 0.9816  
 0.9808

|                                  |        |                                           |        |
|----------------------------------|--------|-------------------------------------------|--------|
| [#6H1]                           | 0.9981 | [cX3H1]([cX3H1])[cX3H1]                   | 0.9659 |
| [cH]                             | 0.9853 | [#6H1][#6H1]                              | 0.9543 |
| best positives                   | prob   | best negatives                            | prob   |
| [#6X3][#6X3]                     | 0.9998 | [CX4H0]([NX3H1])([CX4H3])([CX4H2])[CX4H1] | 0.0    |
| [#6X3][#6X3][#6X3][#6X3]         | 0.9997 | [OX2H0][CX4H2][CX4H2][CX4H1][OX2H0]       | 0.0    |
| [cH][cH]                         | 0.9991 | [CX4H0]([NX3H1])([CX4H2])([CX4H2])[CX4H1] | 0.0    |
| [#6H1]                           | 0.9981 | [CX4H0]([OX2H0])([CX4H3])([CX4H2])[CX4H1] | 0.0    |
| [cH]                             | 0.9853 | [OX2H0][CX4H2][CX4H1]([CX4H1])[CX4H1]     | 0.0    |
| [cX3H1]([cX3H1])[cX3H0]          | 0.9851 | [OX1H0]=[CX3H0]1[CX4H1][CX4H1][CX4H2]1    | 0.0    |
| [#6X3H1][#6X3H0]                 | 0.9816 | [CX4H1]([NX3H0])([CX4H2])[CX4H0]          | 0.0    |
| [#6]1[#6][#6][#6][#6][#6]1       | 0.9808 | [OX2H0]1[CX4H2][CX4H2][CX4H1][CX4H1]1     | 0.0    |
| [cX3H1]([cX3H1])[cX3H1]          | 0.9659 | [CX4H1]([NX3H1])([CX4H3])[CX4H2]          | 0.0    |
| [#6H1][#6H1]                     | 0.9543 | [CX2H1]#[CX2H0][CX3H1]=[CX3H0]            | 0.0    |
| worst negatives                  | prob   | worst positives                           | prob   |
| [cX3H0]([cX3H1])([cX3H0])[OX2H1] | 0.3679 | [OX2H1]                                   | 0.6808 |
| [#7][#6][#6][#6X3]               | 0.2303 | [#6X3H1][#6X3H1][#6X3H0][#6X3H1]          | 0.7855 |
| [cX3H0][cX3H1][cX3H1][cX3H0]     | 0.2131 | [#8][#6][#6][#6X3]                        | 0.8662 |
| [cX3H1]([OX2H0])[cX3H1]          | 0.2107 | [OX2H][cX3]:[c]                           | 0.8725 |
| [#8][#6H1][#6H1]                 | 0.1858 | [cH]cO                                    | 0.9132 |
| [cX3H0][cX3H1][cX3H0][OX2H1]     | 0.1813 | [#8][#6H0][#6H1]                          | 0.9141 |
| [#8][#6H][#6X3][#6X3H]           | 0.1665 | [#6H1][#6H1]                              | 0.9543 |
| [#6X3][#7][#6X3]                 | 0.1618 | [cX3H1]([cX3H1])[cX3H1]                   | 0.9659 |
| [#6]1[#6][#6][#6][#6][#7]1       | 0.1551 | [#6]1[#6][#6][#6][#6][#6]1                | 0.9808 |
| [#7][#6][#6X3]                   | 0.1461 | [#6X3H1][#6X3H0]                          | 0.9816 |

---

Example 173 true smiles: NCCCCCN formula: C5H14N2  
 Index of correct structure: 0 of 97  
 True structure loss: 0.005111  
 True structure:

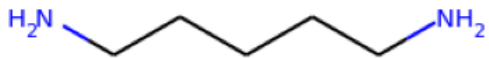

Experimental 13C NMR (solvent: CDCl3)

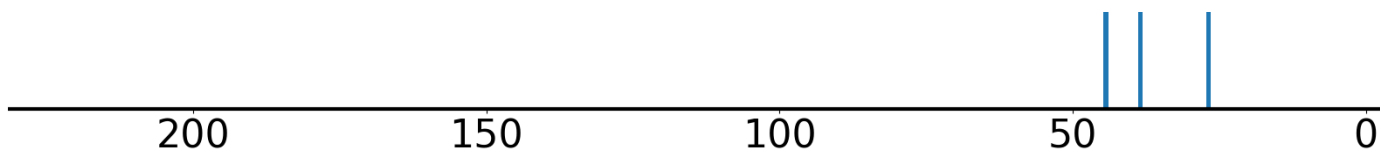

Experimental 1H NMR (solvent: D2O)

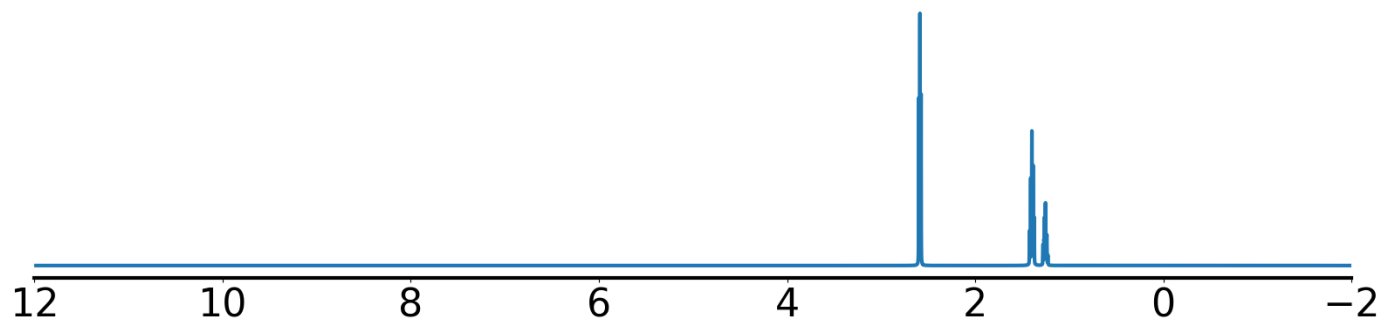

Top predicted structures (loss):

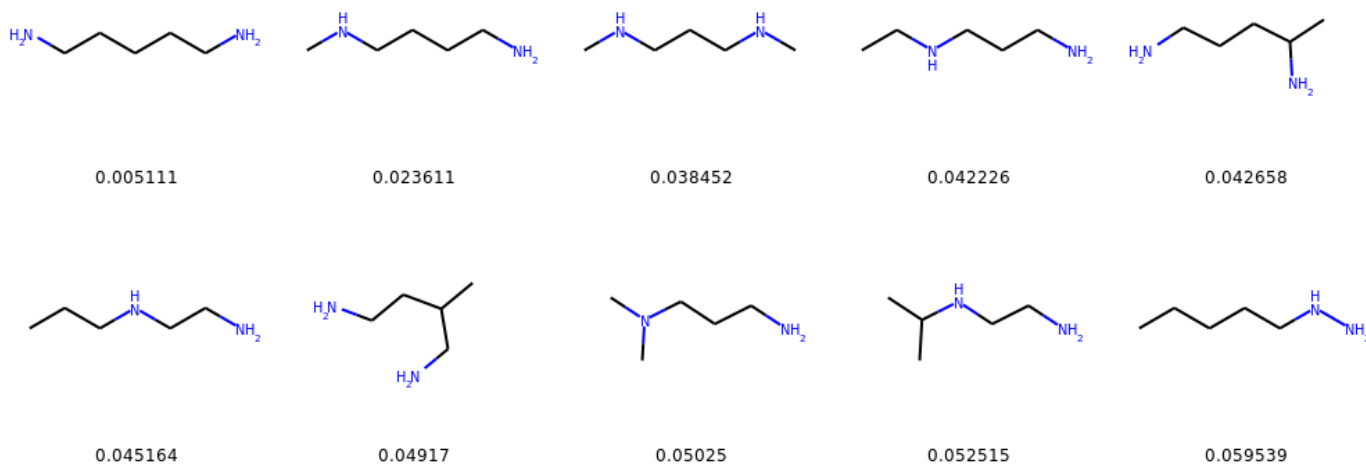

Top predicted substructures  
 [#7X3H2]  
 [CX4H2][[#6]][#6]  
 [#7X3][#6H2]

prob  
 0.9977  
 0.9976  
 0.997

[#7][#6H2][#6H2]  
 [#7H2][#6H2]  
 [CX4H2][CX4H2]

0.9659  
 0.9278  
 0.9225

|                              |        |                                  |        |
|------------------------------|--------|----------------------------------|--------|
| [#7][#6H2]                   | 0.9815 | [CX4H2]([NX3H2])[CX4H2]          | 0.9058 |
| [CX4H2][CX4H2][CX4H2][CX4H2] | 0.9811 | [CX4H2]([CX4H2])[CX4H2]          | 0.9005 |
| best positives               | prob   | best negatives                   | prob   |
| [#7X3H2]                     | 0.9977 | C=CC=CC#C                        | 0.0    |
| [CX4H2]([#6])[#6]            | 0.9976 | [CX2H1]#[CX2H0][CX3H1]=[CX3H0]   | 0.0    |
| [#7X3][#6H2]                 | 0.997  | CC=CCC#C                         | 0.0    |
| [#7][#6H2]                   | 0.9815 | [CX2H0]([CX2H1])[CX3H0]          | 0.0    |
| [CX4H2][CX4H2][CX4H2][CX4H2] | 0.9811 | [#6X2][#6H1][#6X2]               | 0.0    |
| [#7][#6H2][#6H2]             | 0.9659 | [CX3H0]([CX3H1])([CX4H1])[CX2H0] | 0.0    |
| [#7H2][#6H2]                 | 0.9278 | [CX2H0]([CX2H0])[CX2H0]          | 0.0    |
| [CX4H2][CX4H2]               | 0.9225 | [CX3H0]([CX3H1])([OX2H0])[CX2H0] | 0.0    |
| [CX4H2]([NX3H2])[CX4H2]      | 0.9058 | CC=CC#CC                         | 0.0    |
| [CX4H2]([CX4H2])[CX4H2]      | 0.9005 | [CX2H0]([CX2H1])[CX4H1]          | 0.0    |
| worst negatives              | prob   | worst positives                  | prob   |
| [#7][#6][#6][#6][#7]         | 0.4748 | [CX4H2]([CX4H2])[CX4H2]          | 0.9005 |
| [#6H1]                       | 0.3656 | [CX4H2]([NX3H2])[CX4H2]          | 0.9058 |
| [#7][#6][#6][#6][#6][#7]     | 0.3279 | [CX4H2][CX4H2]                   | 0.9225 |
| [#7X3H1]                     | 0.3252 | [#7H2][#6H2]                     | 0.9278 |
| [#6H1][#6H2]                 | 0.3106 | [#7][#6H2][#6H2]                 | 0.9659 |
| [CX4H2]([NX3H1])[CX4H2]      | 0.2858 | [CX4H2][CX4H2][CX4H2][CX4H2]     | 0.9811 |
| [CX4H3][NX3H1]               | 0.1631 | [#7][#6H2]                       | 0.9815 |
| [CX4H3][#6]                  | 0.1178 | [#7X3][#6H2]                     | 0.997  |
| [#7][#6H2][#6H1]             | 0.1173 | [CX4H2]([#6])[#6]                | 0.9976 |
| [CX4H2]([CX4H2])[CX4H1]      | 0.1161 | [#7X3H2]                         | 0.9977 |

---

Example 174 true smiles: OCC(O)C(O)CO formula: C4H10O4  
 Index of correct structure: 0 of 92  
 True structure loss: 0.016919  
 True structure:

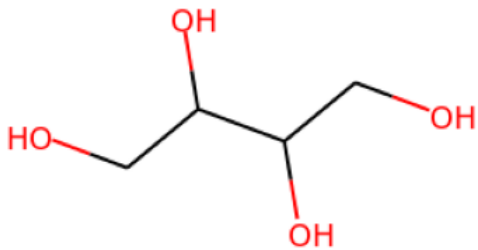

Experimental 13C NMR (solvent: D2O)

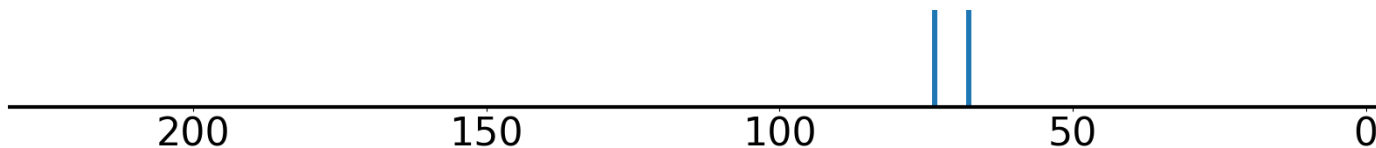

Experimental 1H NMR (solvent: D2O)

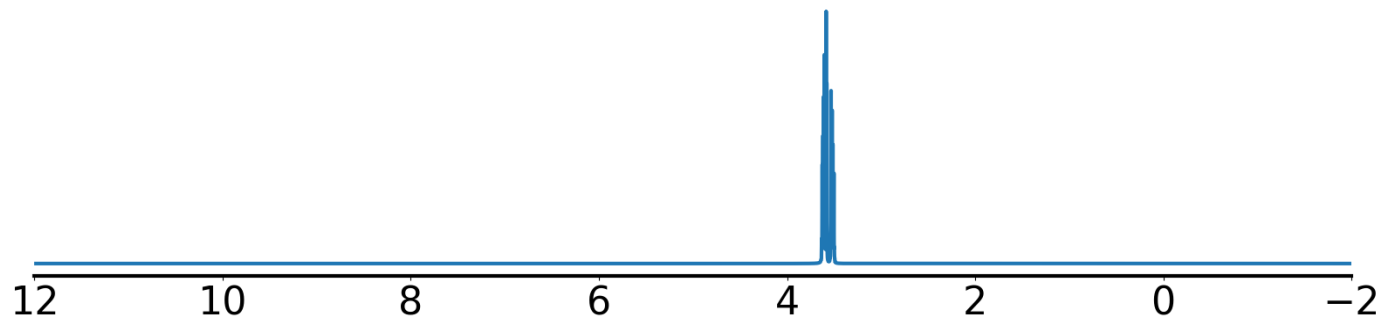

Top predicted structures (loss):

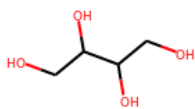

0.016919

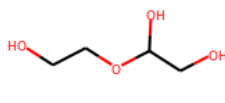

0.020653

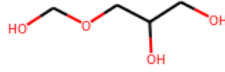

0.02189

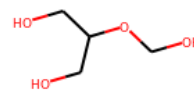

0.022483

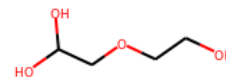

0.023681

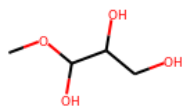

0.024666

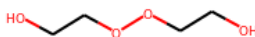

0.0254

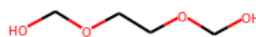

0.026699

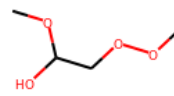

0.028374

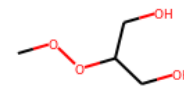

0.029403

Top predicted substructures  
 [CX4H2]([#6])[O]  
 [OX2H1]  
 [#8][#6][#6H2][#8]

prob  
 0.9975  
 0.9968  
 0.9865

[CX4H](O)CO  
 [CX4H2]([OX2H1])[CX4H1]  
 OCC[CH2]

0.8638  
 0.8315  
 0.8025

|                                  |        |                                        |        |
|----------------------------------|--------|----------------------------------------|--------|
| [#8][#6][#6][#8]                 | 0.9858 | [CX4H2](O)[CHX4]                       | 0.7424 |
| [#8][#6][#6H2]                   | 0.9771 | [#8H][#6H2][#6H1]                      | 0.6962 |
| best positives                   | prob   | best negatives                         | prob   |
| [CX4H2]([#6])[O]                 | 0.9975 | CC=CCC#C                               | 0.0    |
| [OX2H1]                          | 0.9968 | [CX2H1]#[CX2H0][CX3H1]=[CX3H0]         | 0.0    |
| [#8][#6][#6H2][#8]               | 0.9865 | CCC#CC=C                               | 0.0    |
| [#8][#6][#6][#8]                 | 0.9858 | CC=CC#CC                               | 0.0    |
| [#8][#6][#6H2]                   | 0.9771 | C=CCCC#C                               | 0.0    |
| [CX4H](O)CO                      | 0.8638 | [#7][#6]=[#6][#6][#6]=[#7]             | 0.0    |
| [CX4H2]([OX2H1])[CX4H1]          | 0.8315 | [CX3H0][CX4H2][CX3H1]=[CX3H0]          | 0.0    |
| OCC[CH2]                         | 0.8025 | [CX3H1](=[CX3H2])[CX2H0]               | 0.0    |
| [CX4H2](O)[CHX4]                 | 0.7424 | CC#CCC=C                               | 0.0    |
| [#8H][#6H2][#6H1]                | 0.6962 | [OX1H0]=[CX3H0]1[CX4H1][CX4H1][CX4H2]1 | 0.0    |
| worst negatives                  | prob   | worst positives                        | prob   |
| [CX4H2][CX4H2]                   | 0.4858 | [#6H2][#6H1][#6H1][#6H2]               | 0.1591 |
| [CH2X4](O)[CX4H2]                | 0.4395 | [#8][#6][#6][#6][#6][#8]               | 0.2583 |
| [CX4H2]([OX2H0])[CX4H2]          | 0.371  | [#8][#6H1][#6H1]                       | 0.2611 |
| O[CX4H2][CX4H2]O                 | 0.2279 | [CX4H1]([OX2H1])([CX4H2])[CX4H1]       | 0.2855 |
| [CX4H2][OX2H0][CX4H2]            | 0.2006 | [#6H1][#6H1]                           | 0.3125 |
| [CX4H1]([OX2H1])([CX4H2])[CX4H2] | 0.1785 | O[CX4H]([CX4H2])[CX4H1]                | 0.3703 |
| [#6H1]([#6H2])[#6H2]             | 0.1477 | O[CX4H][CX4H2]                         | 0.5707 |
| [OX2H0][CX4H2][CX4H2][OX2H0]     | 0.1118 | [#6X4H2][#6H1][#8H]                    | 0.5736 |
| [CX4H1]([OX2H1])([CX4H1])[CX4H1] | 0.1081 | [#6H1][#6H2]                           | 0.5941 |
| [CX4H2]([OX2H1])[CX4H2]          | 0.0987 | [OX2H1][CX4H1][CX4H1][OX2H1]           | 0.5981 |

---

Example 175 true smiles: OCC(O)C(O)CO formula: C4H10O4  
 Index of correct structure: 0 of 92  
 True structure loss: 0.016768  
 True structure:



Experimental 13C NMR (solvent: CD3OD)



Experimental 1H NMR (solvent: D2O)

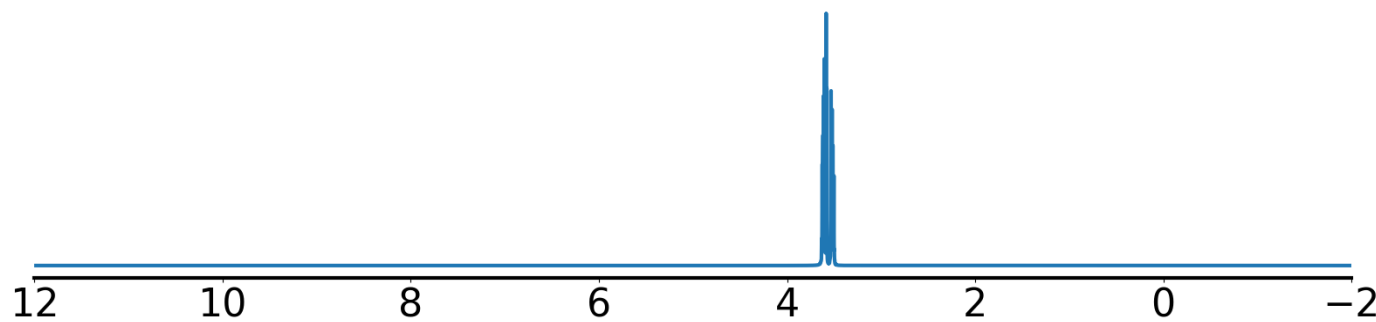

Top predicted structures (loss):



0.016768



0.02061



0.021821



0.022514



0.023665



0.024513



0.02567



0.026953



0.028259

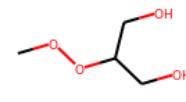

0.029418

Top predicted substructures  
 [CX4H2]([#6])[O]  
 [OX2H1]  
 [#8][#6][#6H2][#8]

prob  
 0.9976  
 0.997  
 0.9868

[CX4H](O)CO  
 [CX4H2]([OX2H1])[CX4H1]  
 OCC[CH2]

0.8726  
 0.8343  
 0.8025



|                                  |        |                                   |        |
|----------------------------------|--------|-----------------------------------|--------|
| [#8][#6][#6][#8]                 | 0.986  | [CX4H2](O)[CHX4]                  | 0.743  |
| [#8][#6][#6H2]                   | 0.9768 | [#8H][#6H2][#6H1]                 | 0.6936 |
| best positives                   | prob   | best negatives                    | prob   |
| [CX4H2]([#6])[O]                 | 0.9976 | CC=CCC#C                          | 0.0    |
| [OX2H1]                          | 0.997  | [CX2H1]#[CX2H0][CX3H1]=[CX3H0]    | 0.0    |
| [#8][#6][#6H2][#8]               | 0.9868 | CCC#CC=C                          | 0.0    |
| [#8][#6][#6][#8]                 | 0.986  | CC=CC#CC                          | 0.0    |
| [#8][#6][#6H2]                   | 0.9768 | C=CCCC#C                          | 0.0    |
| [CX4H](O)CO                      | 0.8726 | [#7][#6]=[#6][#6][#6]=[#7]        | 0.0    |
| [CX4H2]([OX2H1])[CX4H1]          | 0.8343 | [CX3H0][CX4H2][CX3H1]=[CX3H0]     | 0.0    |
| OCC[CH2]                         | 0.8025 | CC#CCC=C                          | 0.0    |
| [CX4H2](O)[CHX4]                 | 0.743  | [CX3H1](=[CX3H2])[CX2H0]          | 0.0    |
| [#8H][#6H2][#6H1]                | 0.6936 | [CX3H0](=[CX3H1])([CX4H2])[CX2H0] | 0.0    |
| worst negatives                  | prob   | worst positives                   | prob   |
| [CX4H2][CX4H2]                   | 0.4851 | [#6H2][#6H1][#6H1][#6H2]          | 0.1637 |
| [CH2X4](O)[CX4H2]                | 0.4406 | [#8][#6][#6][#6][#6][#8]          | 0.2587 |
| [CX4H2]([OX2H0])[CX4H2]          | 0.3707 | [#8][#6H1][#6H1]                  | 0.2632 |
| O[CX4H2][CX4H2]O                 | 0.2245 | [CX4H1]([OX2H1])([CX4H2])[CX4H1]  | 0.2898 |
| [CX4H2][OX2H0][CX4H2]            | 0.1964 | [#6H1][#6H1]                      | 0.3079 |
| [CX4H1]([OX2H1])([CX4H2])[CX4H2] | 0.1786 | O[CX4H]([CX4H2])[CX4H1]           | 0.379  |
| [#6H1]([#6H2])[#6H2]             | 0.1469 | O[CX4H][CX4H2]                    | 0.5761 |
| [OX2H0][CX4H2][CX4H2][OX2H0]     | 0.1147 | [#6X4H2][#6H1][#8H]               | 0.5827 |
| [CX4H1]([OX2H1])([CX4H1])[CX4H1] | 0.1096 | [#6H1][#6H2]                      | 0.5944 |
| [#6X4H1][#6X4H1][#6X4H1]         | 0.1004 | [OX2H1][CX4H1][CX4H1][OX2H1]      | 0.6005 |

---

Example 176 true smiles: OCC=CO formula: C4H8O2  
 Index of correct structure: 0 of 72  
 True structure loss: 0.00449  
 True structure:

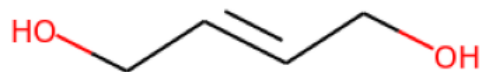

Experimental <sup>13</sup>C NMR (solvent: DMSO-d6)

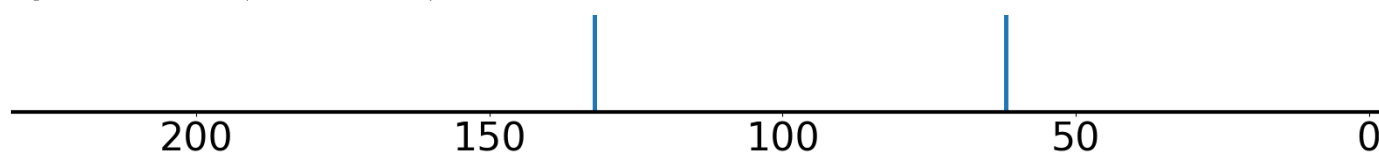

Experimental <sup>1</sup>H NMR (solvent: CDCl3)

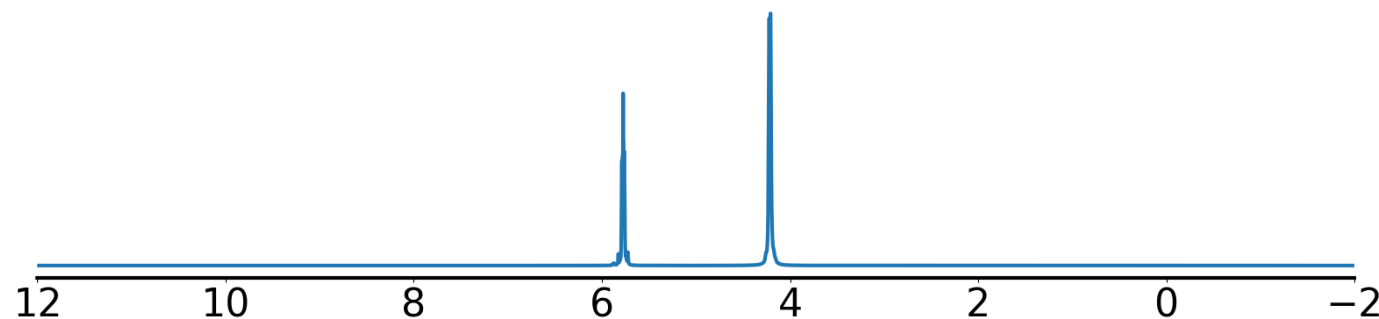

Top predicted structures (loss):

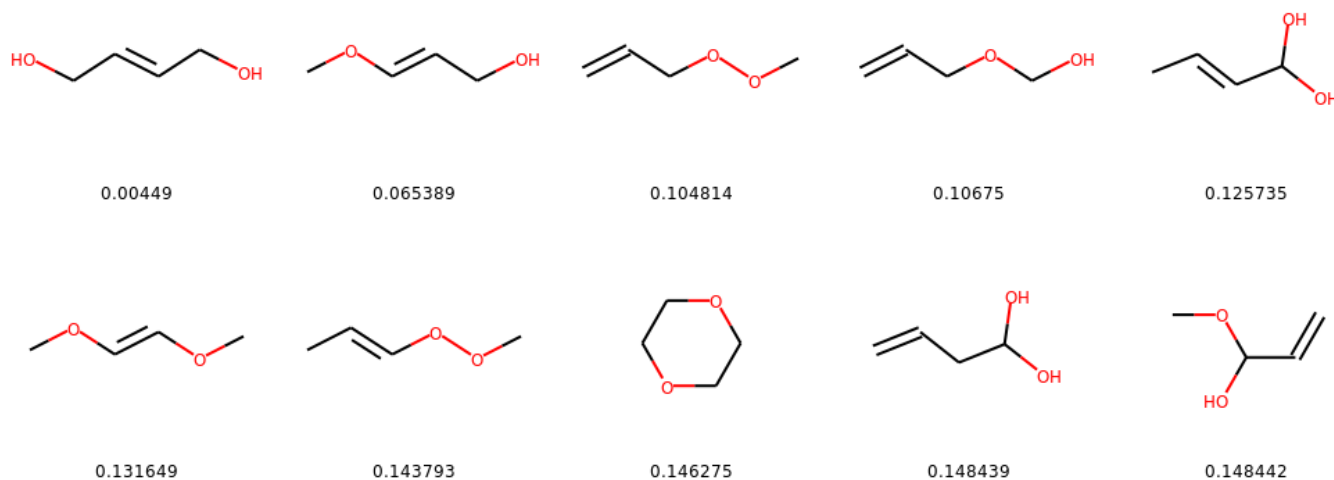

Top predicted substructures  
 [CHX3](=C)C  
 [#6H1]  
 [#8][#6H2][#6H]=[#6X3]

prob  
 0.9998  
 0.9996  
 0.9992

[CX3H1](=[CX3H1])[CX4H2]  
 [CX4H2]([#6])[O]  
 O[CX4H2][CX3H1]

0.9912  
 0.9907  
 0.9892

|                          |        |                                   |        |
|--------------------------|--------|-----------------------------------|--------|
| [CX4H2][CX3]=C           | 0.998  | [#8][#6][#6]=[#6X3]               | 0.9767 |
| [#8H][#6H2][#6H1]        | 0.9952 | [#6X3][#6H2][#8]                  | 0.9551 |
| best positives           | prob   | best negatives                    | prob   |
| [CHX3](=C)C              | 0.9998 | [CX2H0](#[CX2H1])[CX3H0]          | 0.0    |
| [#6H1]                   | 0.9996 | [CX2H0](#[CX2H1])[CX4H0]          | 0.0    |
| [#8][#6H2][#6H]=[#6X3]   | 0.9992 | [CX2H1]#[CX2H0][CX3H1]=[CX3H0]    | 0.0    |
| [CX4H2][CX3]=C           | 0.998  | C=CC=CC#C                         | 0.0    |
| [#8H][#6H2][#6H1]        | 0.9952 | [#6X2][#6H1][#6X2]                | 0.0    |
| [CX3H1](=[CX3H1])[CX4H2] | 0.9912 | CC#CCC#C                          | 0.0    |
| [CX4H2](#[#6])[O]        | 0.9907 | [CX2H0](#[CX2H1])[CX4H1]          | 0.0    |
| O[CX4H2][CX3H1]          | 0.9892 | [CX3H0](=[CX3H1])([OX2H0])[CX2H0] | 0.0    |
| [#8][#6][#6]=[#6X3]      | 0.9767 | [CX4H2]( [CX4H0] ) [CX2H0]        | 0.0    |
| [#6X3][#6H2][#8]         | 0.9551 | [CX2H0](#[CX2H1])[CX4H2]          | 0.0    |
| worst negatives          | prob   | worst positives                   | prob   |
| [#6H1][#6H1]             | 0.3787 | [#8][#6][#6]=[#6][#6][#8]         | 0.499  |
| [OH][CX4H]               | 0.2697 | [CX4H2][CX3H]                     | 0.6949 |
| [CX3H][CX4H]             | 0.1495 | [#6H1][#6H2]                      | 0.8259 |
| [#8][#6H1][#6H1]         | 0.1355 | [CHX3]=[CHX3]                     | 0.8984 |
| [#8][#6][#6][#6X3]       | 0.1217 | [CX4H2]( [OX2H1] ) [CX3H1]        | 0.9102 |
| [CX4H3][OX2H0]           | 0.1053 | [OX2H1]                           | 0.9327 |
| [CX3H1](=[CX3H1])[CX4H1] | 0.1026 | [#8][#6H2][#6X3H]=[#6X3H]         | 0.9339 |
| [CX3H1](=[CX3H1])[CX3H1] | 0.0938 | [#6H2][#6H1]=[#6H1][#6H2]         | 0.9548 |
| [#6X3][#6X3]             | 0.0783 | [#6X3][#6H2][#8]                  | 0.9551 |
| [CX4H3]                  | 0.0777 | [#8][#6][#6]=[#6X3]               | 0.9767 |

---

Example 177 true smiles: COCC(C)=O formula: C4H8O2  
 Index of correct structure: 0 of 72  
 True structure loss: 0.006544  
 True structure:

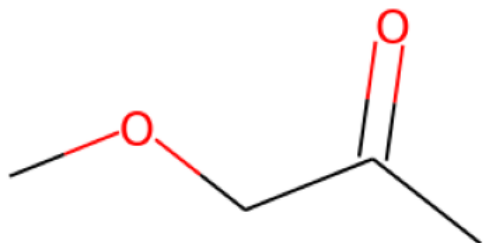

Experimental <sup>13</sup>C NMR (solvent: CDCl<sub>3</sub>)

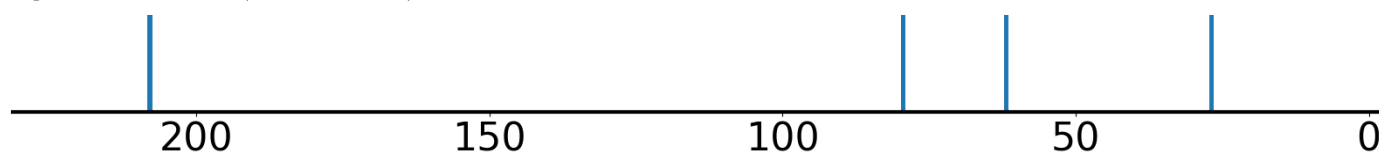

Experimental <sup>1</sup>H NMR (solvent: CDCl<sub>3</sub>)

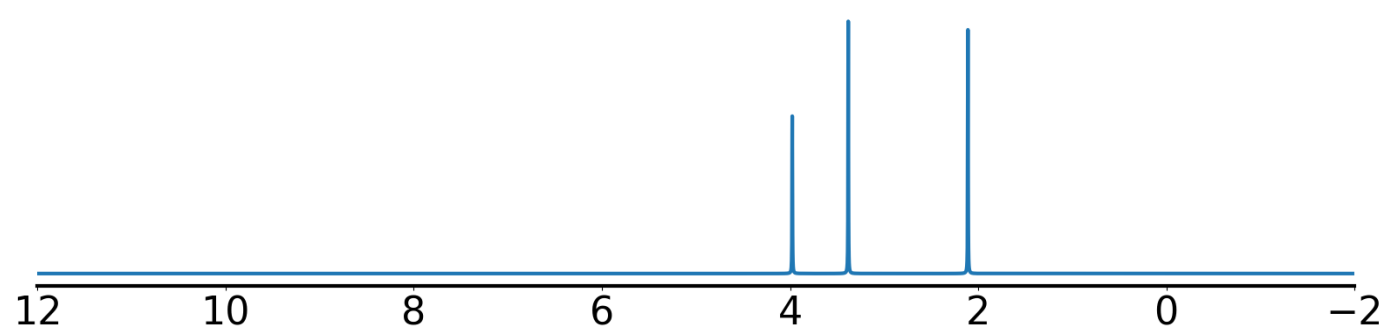

Top predicted structures (loss):

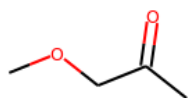

0.006544

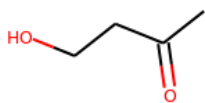

0.060101

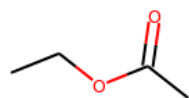

0.114435

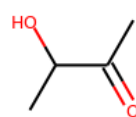

0.115004

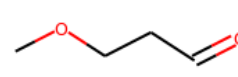

0.130328

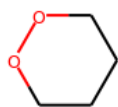

0.131932

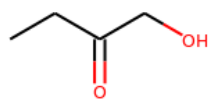

0.134524

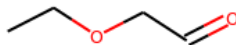

0.138948

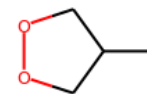

0.140668

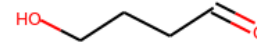

0.141956

Top predicted substructures

[CX4H3][CX3]  
 [CX4H3][CX3H0]  
 [CX4H3]

prob  
 1.0  
 0.9999  
 0.9998

[#6H3][#6][#6]  
 [#6H3][#6H0]  
 [CX4H3][#6]

0.9977  
 0.9962  
 0.9908

|                              |        |                                   |        |
|------------------------------|--------|-----------------------------------|--------|
| [CX3](=[OX1])C               | 0.9995 | [OX2H0][CX4H2][CX3H0][CX4H3]      | 0.9906 |
| [OX1H0]=[CX3H0][CX4H3]       | 0.9994 | [CX4H2]([OX2H0])[CX3H0]           | 0.9724 |
| best positives               | prob   | best negatives                    | prob   |
| [CX4H3][CX3]                 | 1.0    | CCC#CC#C                          | 0.0    |
| [CX4H3][CX3H0]               | 0.9999 | C=CC=CC#C                         | 0.0    |
| [CX4H3]                      | 0.9998 | [CX3H0](=[CX3H1])([CX4H1])[CX2H0] | 0.0    |
| [CX3](=[OX1])C               | 0.9995 | CC=CC#CC                          | 0.0    |
| [OX1H0]=[CX3H0][CX4H3]       | 0.9994 | [CX2H0](#[CX2H1])[CX3H0]          | 0.0    |
| [#6H3][#6][#6]               | 0.9977 | [#6X2][#6H1][#6X2]                | 0.0    |
| [#6H3][#6H0]                 | 0.9962 | [CX2H0](#[CX2H1])[CX4H0]          | 0.0    |
| [CX4H3][#6]                  | 0.9908 | [CX2H0](#[NX1H0])[CX3H1]          | 0.0    |
| [OX2H0][CX4H2][CX3H0][CX4H3] | 0.9906 | [#7][#6][#6][#7]                  | 0.0    |
| [CX4H2]([OX2H0])[CX3H0]      | 0.9724 | [CX2H0](#[CX2H0])[CX2H0]          | 0.0    |
| worst negatives              | prob   | worst positives                   | prob   |
| OCC[CH2]                     | 0.3472 | [#8][#6][#6]=[#8]                 | 0.7237 |
| [#8][#6][#6H2]               | 0.318  | [#8]=[#6][#6H2][#8]               | 0.7293 |
| [#8]=[#6H0][#6H1]            | 0.2955 | [CX4H2][CX3]=O                    | 0.7488 |
| [CX4H2]CC=O                  | 0.293  | [CX3H0](=[OX1H0])([CX4H3])[CX4H2] | 0.7952 |
| [#6H1]                       | 0.2557 | [#6X3][#6H2][#8]                  | 0.833  |
| [#8][#6][#6][#6X3]           | 0.2477 | [OX1H0]=[CX3H0]([#6])[CX4H2]      | 0.9026 |
| [#6H1][#6H2]                 | 0.2464 | [#6H3][#6X3H0][#6H2]              | 0.906  |
| [OX2H1]                      | 0.1511 | [CX4H3][OX2H0]                    | 0.9204 |
| [CX4H2][CX4H2]               | 0.1506 | [CX4H2]([#6])[O]                  | 0.928  |
| [CX4H2]([OX2H0])[CX4H2]      | 0.1477 | [CX4H3][OX2H0][CX4H2]             | 0.9368 |

---

Example 178 true smiles: CCCC(=O)O formula: C4H8O2  
 Index of correct structure: 0 of 72  
 True structure loss: 0.00878  
 True structure:

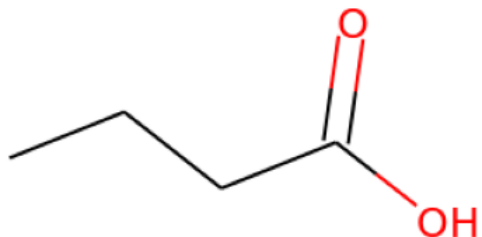

Experimental 13C NMR (solvent: CDCl3)

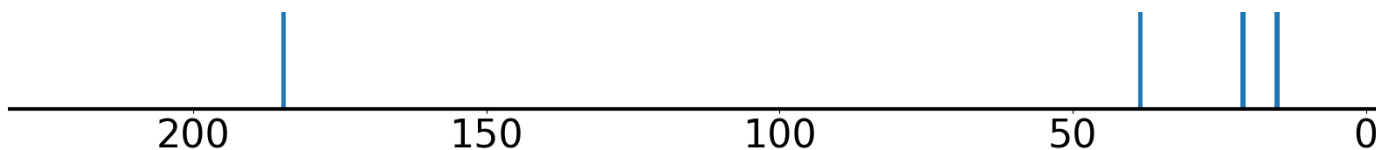

Experimental 1H NMR (solvent: D2O)

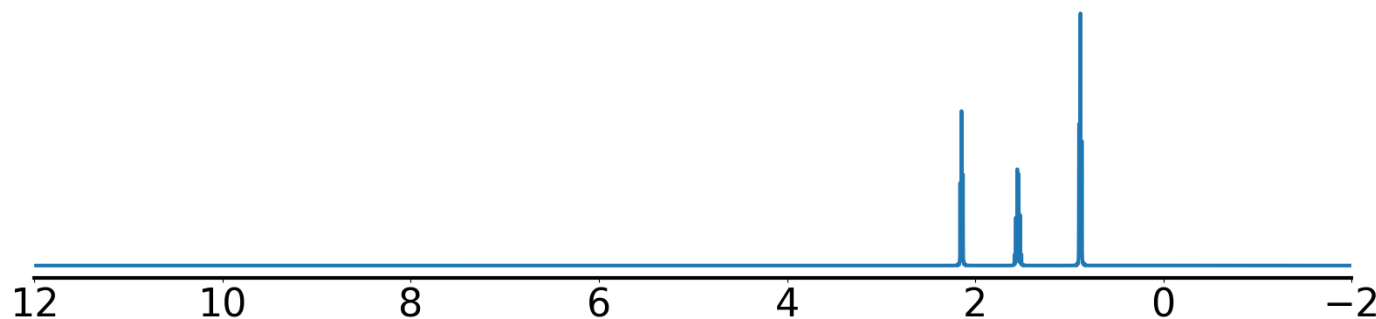

Top predicted structures (loss):

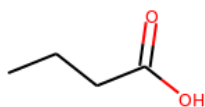

0.00878

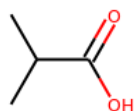

0.056313

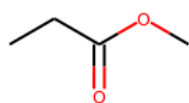

0.092859

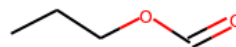

0.100006

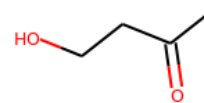

0.111503

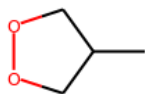

0.116315

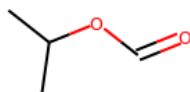

0.120523

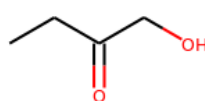

0.126294

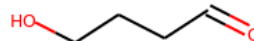

0.127472

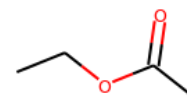

0.128485

Top predicted substructures

[CX3](=[OX1])C  
 [CX4H2]([#6])[#6]  
 [#6H3][#6][#6]

prob  
 0.999  
 0.9989  
 0.9989

[CX4H3][CX4H2]  
 [#8]=[#6][#8]  
 [CX3](=O)[OX2H1]

0.9942  
 0.9941  
 0.9921

|                                   |        |                                   |        |
|-----------------------------------|--------|-----------------------------------|--------|
| [CX4H3][#6]                       | 0.9977 | [OX2H1]                           | 0.987  |
| [CX4H3]                           | 0.9972 | [CX3](=[OX1])O                    | 0.9727 |
| best positives                    | prob   | best negatives                    | prob   |
| [CX3](=[OX1])C                    | 0.999  | CCC=CC#C                          | 0.0    |
| [CX4H2]([#6])[#6]                 | 0.9989 | [CX2H1]#[CX2H0][CX3H1]=[CX3H0]    | 0.0    |
| [#6H3][#6][#6]                    | 0.9989 | CCC#CC#C                          | 0.0    |
| [CX4H3][#6]                       | 0.9977 | CC=CC#CC                          | 0.0    |
| [CX4H3]                           | 0.9972 | CC=CCC#C                          | 0.0    |
| [CX4H3][CX4H2]                    | 0.9942 | C=CCCC#C                          | 0.0    |
| [#8]=[#6][#8]                     | 0.9941 | C=CC=CC#C                         | 0.0    |
| [CX3](=O)[OX2H1]                  | 0.9921 | [CX2H0]([#CX2H1])[CX3H1]          | 0.0    |
| [OX2H1]                           | 0.987  | [CX3H1](=[CX3H1])[CX2H0]          | 0.0    |
| [CX3](=[OX1])O                    | 0.9727 | [CX3H0](=[CX3H1])([OX2H0])[CX2H0] | 0.0    |
| worst negatives                   | prob   | worst positives                   | prob   |
| [CX3H0](=[OX1H0])([OX2H1])[CX4H1] | 0.5366 | [#8][#6][#6H2]                    | 0.4587 |
| [#8]=[#6H0][#6H1]                 | 0.3821 | [OX1H0]=[CX3H0]([#8])[CX4H2]      | 0.5066 |
| [#8][#6H0][#6H1]                  | 0.3477 | O=[CX3H0][CX4H2][CX4H2]           | 0.5954 |
| O=[CX3][CX4H]                     | 0.2241 | [CX4H2][CX3]=O                    | 0.6263 |
| [CX4H3][CX4H1]                    | 0.1645 | OCC[CH2]                          | 0.6402 |
| [#6H1]                            | 0.1644 | [#6X3][#6][#6H3]                  | 0.7231 |
| [#6H1][#6H2]                      | 0.1625 | [CX4H2]CC=O                       | 0.7422 |
| [#8]=[#6][#6][#8]                 | 0.1511 | [CX4H2]([CX4H2])[CX3H0]           | 0.7681 |
| [#8][#6][#6]=[#8]                 | 0.1134 | [CX3H0](=[OX1H0])([OX2H1])[CX4H2] | 0.8081 |
| [CH3]CC[OH]                       | 0.1129 | [CX4H2][CX4H2]                    | 0.8794 |

---

Example 179 true smiles: CC(C)C(=O)O formula: C4H8O2  
 Index of correct structure: 0 of 72  
 True structure loss: 0.005506  
 True structure:

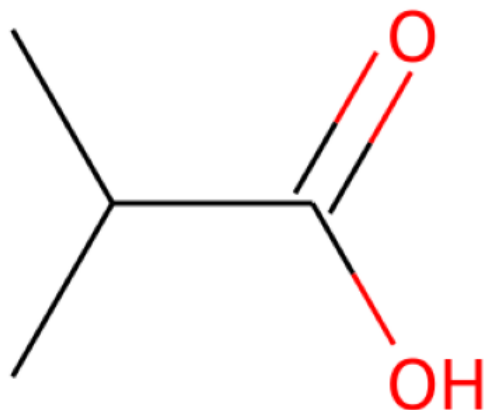

Experimental <sup>13</sup>C NMR (solvent: CDCl<sub>3</sub>)

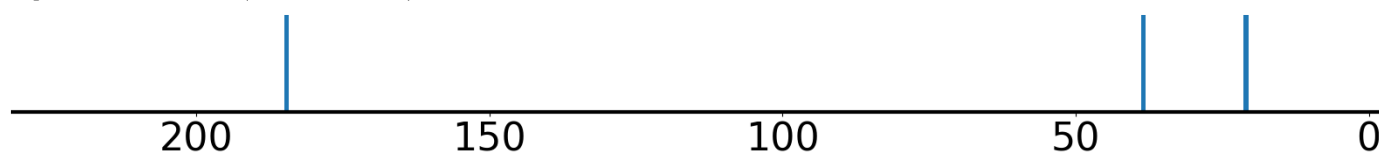

Experimental <sup>1</sup>H NMR (solvent: CDCl<sub>3</sub>)

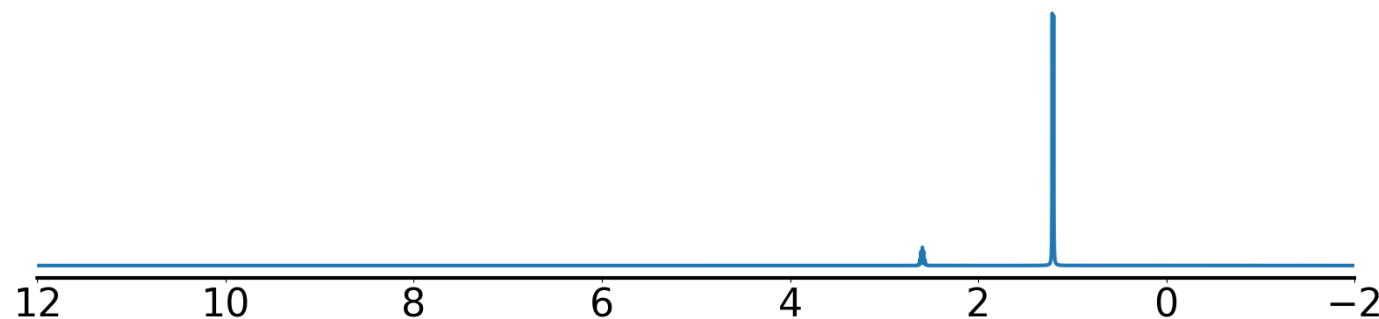

Top predicted structures (loss):

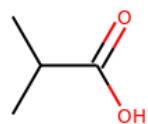

0.005506

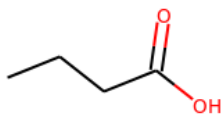

0.077914

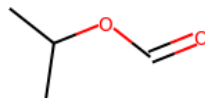

0.084234

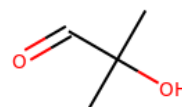

0.101948

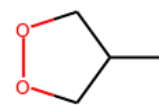

0.107408

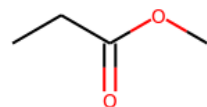

0.113703

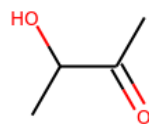

0.124453

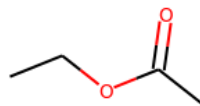

0.127398

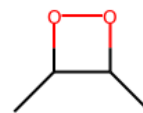

0.129836

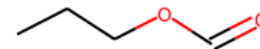

0.132785

Top predicted substructures  
 [CX4H3]  
 [#6H3][#6][#6]  
 [CX4H3][#6]

prob  
 1.0  
 0.9999  
 0.9998

[#8]=[#6][#8]  
 [CX4H3][CX4H1]  
 [CX3](=[OX1])O

0.9846  
 0.9659  
 0.9634



|                                   |        |                                   |        |
|-----------------------------------|--------|-----------------------------------|--------|
| [CX3](=[OX1])C                    | 0.9977 | O=[CX3][CX4H]                     | 0.9352 |
| [CX3](=O)[OX2H1]                  | 0.9969 | [OX2H1]                           | 0.9339 |
| best positives                    | prob   | best negatives                    | prob   |
| [CX4H3]                           | 1.0    | [CX2H1]#[CX2H0][CX3H1]=[CX3H0]    | 0.0    |
| [#6H3][#6][#6]                    | 0.9999 | C=CC=CC#C                         | 0.0    |
| [CX4H3][#6]                       | 0.9998 | CCC#CC#C                          | 0.0    |
| [CX3](=[OX1])C                    | 0.9977 | CC=CC#CC                          | 0.0    |
| [CX3](=O)[OX2H1]                  | 0.9969 | [CX2H0](#[CX2H1])[CX3H0]          | 0.0    |
| [#8][#6][#8]                      | 0.9846 | [CX2H0](#[CX2H1])[CX4H2]          | 0.0    |
| [CX4H3][CX4H1]                    | 0.9659 | CCC=CC#C                          | 0.0    |
| [CX3](=[OX1])O                    | 0.9634 | [CX4H3][CX2H0]                    | 0.0    |
| O=[CX3][CX4H]                     | 0.9352 | [#6H2]=[#6][#6X2]                 | 0.0    |
| [OX2H1]                           | 0.9339 | [CX2H0](#[CX2H0])[CX2H0]          | 0.0    |
| worst negatives                   | prob   | worst positives                   | prob   |
| [#8][#6][#6H1][#6H1]              | 0.4888 | [CH3]CC[OH]                       | 0.5814 |
| [#6X3][#6][#6][#6H3]              | 0.2938 | [CHX4]([CH3X4])[CH3X4]            | 0.7996 |
| [#6H1][#6H1]                      | 0.286  | [#8][#6H0][#6H1]                  | 0.8055 |
| [CX3H0](=[OX1H0])([OX2H1])[CX4H2] | 0.2048 | [#6H3][#6][#6X3]                  | 0.8144 |
| [CX4H2]CC=O                       | 0.1892 | [CX3H0](=[OX1H0])([OX2H1])[CX4H1] | 0.864  |
| [#6H3][#6][#6][#6H3]              | 0.1777 | [CX4H1]([CX4H3])([CX4H3])[CX3H0]  | 0.8774 |
| [CHX4]([CH3X4])[CH2X4]            | 0.168  | [#8]=[#6H0][#6H1]                 | 0.9054 |
| [CX4H2][CX3]=O                    | 0.0983 | [#6H1]                            | 0.9079 |
| [CX4H2]([CH])[CH]                 | 0.0814 | [OX2H1]                           | 0.9339 |
| [#6H1][#6H2]                      | 0.0726 | O=[CX3][CX4H]                     | 0.9352 |

---

Example 180 true smiles: COC(C)CCO formula: C5H12O2  
 Index of correct structure: 0 of 69  
 True structure loss: 0.013422  
 True structure:

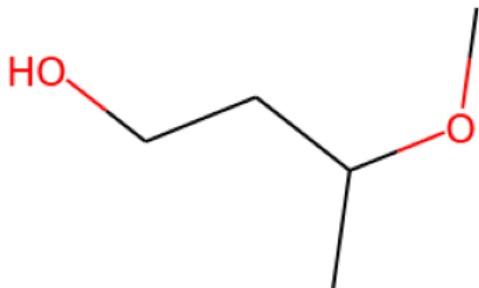

Experimental <sup>13</sup>C NMR (solvent: CDCl<sub>3</sub>)

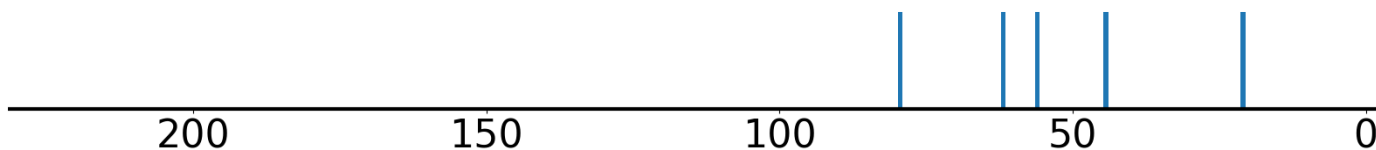

Experimental <sup>1</sup>H NMR (solvent: CDCl<sub>3</sub>)

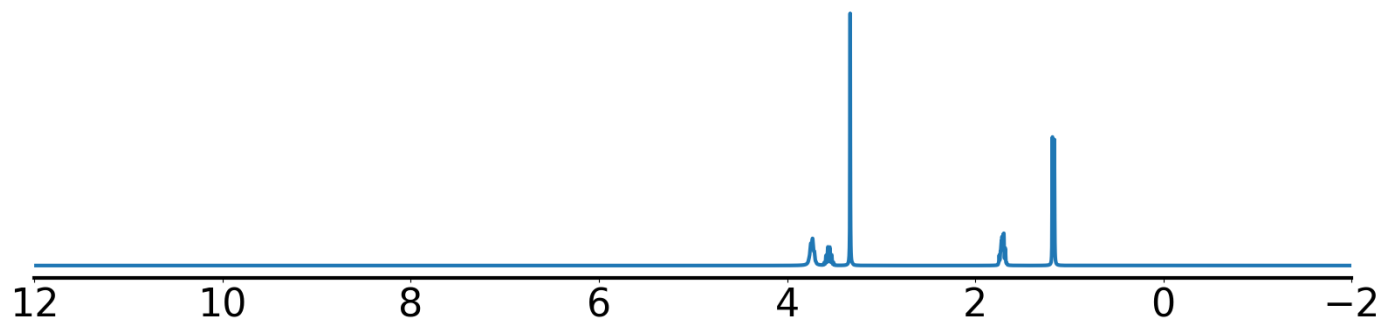

Top predicted structures (loss):

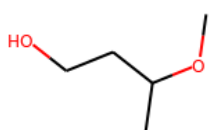

0.013422

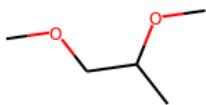

0.031664

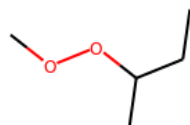

0.032577

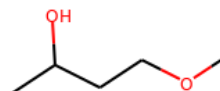

0.035588

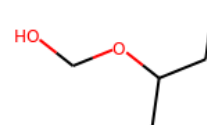

0.040513

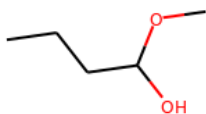

0.041928

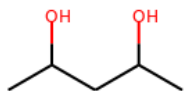

0.042913

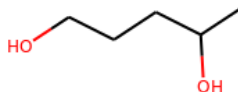

0.043718

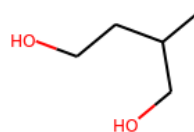

0.044175

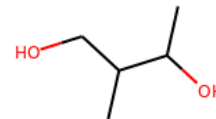

0.044311

Top predicted substructures  
 [CX4H3]  
 [CX4H3][#6]  
 [#6H3][#6][#6]

prob  
 1.0  
 0.9974  
 0.9944

[CX4H3][CX4H1]  
 [CX4H3][CX4]O  
 [#6H1][#6H2]

0.9701  
 0.9668  
 0.9402

|                                  |        |                                   |        |
|----------------------------------|--------|-----------------------------------|--------|
| [CX4H3][OX2H0]                   | 0.9924 | [CX4H]O                           | 0.9263 |
| [#6H1]                           | 0.9916 | [CX4H2]([#6])[O]                  | 0.8977 |
| best positives                   | prob   | best negatives                    | prob   |
| [CX4H3]                          | 1.0    | [CX2H0](#[CX2H1])[cX3H0]          | 0.0    |
| [CX4H3][#6]                      | 0.9974 | CCC=CC#C                          | 0.0    |
| [#6H3][#6][#6]                   | 0.9944 | CC=CC#CC                          | 0.0    |
| [CX4H3][OX2H0]                   | 0.9924 | [#7][#6]=[#6][#6]#[#7]            | 0.0    |
| [#6H1]                           | 0.9916 | C=CC=CC#C                         | 0.0    |
| [CX4H3][CX4H1]                   | 0.9701 | CC=CCC#C                          | 0.0    |
| [CX4H3][CX4]O                    | 0.9668 | [CX3H0](=[CX3H1])([OX2H0])[CX2H0] | 0.0    |
| [#6H1][#6H2]                     | 0.9402 | [CX2H0](#[CX2H0])[CX2H0]          | 0.0    |
| [CX4H]O                          | 0.9263 | [CX2H1]#[CX2H0][CX3H1]=[CX3H0]    | 0.0    |
| [CX4H2]([#6])[O]                 | 0.8977 | CCC#CC#C                          | 0.0    |
| worst negatives                  | prob   | worst positives                   | prob   |
| [#8][#6H1][#6H1]                 | 0.54   | [OX2H0][CX4H1][CX4H2][CX4H2]      | 0.3091 |
| [#6H1][#6H1]                     | 0.429  | [CH2X4](O)[CX4H2]                 | 0.4421 |
| [CX4H3][OX2H0][CX4H2]            | 0.3905 | O[CX4H][CX4H2]                    | 0.5162 |
| [OH][CX4H]                       | 0.292  | [CX4H2]([OX2H1])[CX4H2]           | 0.5304 |
| [CX4H2]([CX4H1])[CX4H1]          | 0.2727 | [CX4H2][CX4H2]                    | 0.5396 |
| [#8][#6][#6][#6][#6][#8]         | 0.2527 | [CHX4]([CH3X4])[CH2X4]            | 0.5901 |
| [CX4H2](O)[CHX4]                 | 0.2359 | [CX4H2]([CX4H2])[CX4H1]           | 0.6575 |
| O[CX4H]([CX4H2])[CX4H1]          | 0.1783 | [CX4H2]([#6])[#6]                 | 0.6716 |
| [CX4H2]([CH])[CH]                | 0.1768 | [CX4H1]([OX2H0])([CX4H3])[CX4H2]  | 0.761  |
| [CX4H1]([OX2H1])([CX4H3])[CX4H1] | 0.1731 | [OX2H0][CX4H1][CX4H3]             | 0.8019 |

---

Example 181 true smiles: COC(C)(C)OC formula: C5H12O2  
 Index of correct structure: 0 of 69  
 True structure loss: 0.004759  
 True structure:

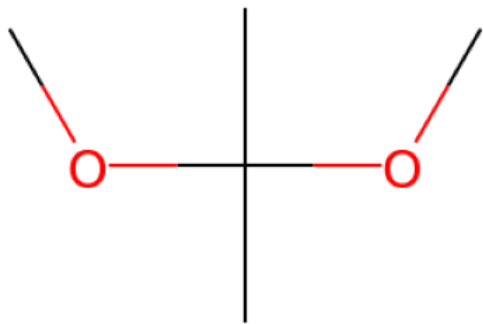

Experimental 13C NMR (solvent: CDCl3)

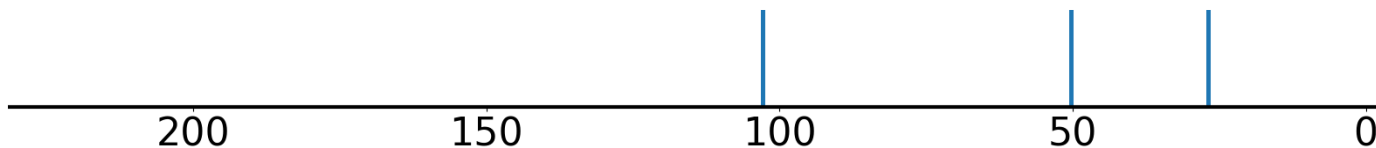

Experimental 1H NMR (solvent: CDCl3)

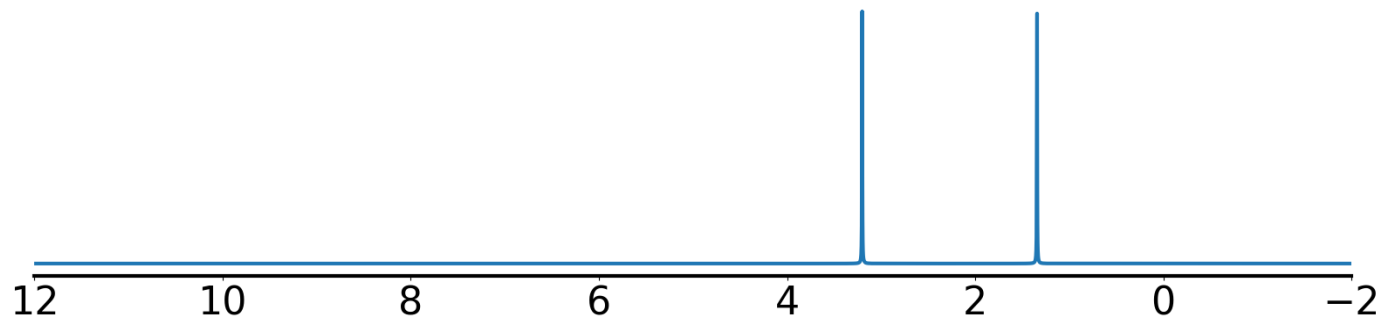

Top predicted structures (loss):

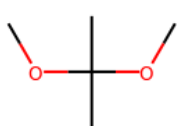

0.004759

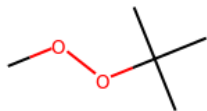

0.014062

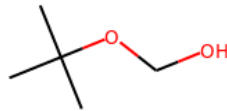

0.022775

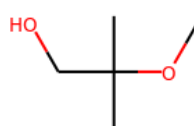

0.045376

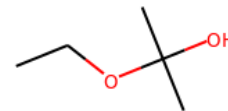

0.045577

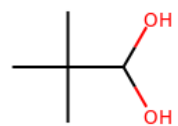

0.04945

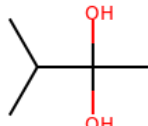

0.053543

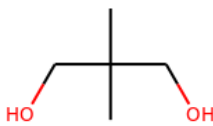

0.062637

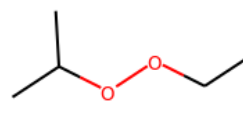

0.064374

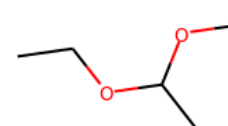

0.066537

Top predicted substructures  
 [CX4H3]  
 [CX4H3][#6]  
 [CX4H3][CX4]O

prob  
 0.9999  
 0.9997  
 0.9995

[#6H3][#6][#6]  
 [#6H3][#8][#6H0][#8]  
 [CH3][#6][#8]

0.9887  
 0.9717  
 0.9704

|                            |        |                                   |        |
|----------------------------|--------|-----------------------------------|--------|
| [CX4H3][CX4H0]             | 0.9935 | [#6H3][#6H0]                      | 0.9627 |
| [CX4H3][OX2H0]             | 0.9935 | [#6H0]([#6H3])([#6H3])[#8]        | 0.9389 |
| best positives             | prob   | best negatives                    | prob   |
| [CX4H3]                    | 0.9999 | [CX2H0](#[CX2H1])[cX3H0]          | 0.0    |
| [CX4H3][#6]                | 0.9997 | CCC#CC#C                          | 0.0    |
| [CX4H3][CX4]O              | 0.9995 | C=CC=CC#C                         | 0.0    |
| [CX4H3][CX4H0]             | 0.9935 | [CX2H0](#[CX2H0])[CX2H0]          | 0.0    |
| [CX4H3][OX2H0]             | 0.9935 | [#7][#6]=[#6][#6][#7]             | 0.0    |
| [#6H3][#6][#6]             | 0.9887 | CC#CCC#C                          | 0.0    |
| [#6H3][#8][#6H0][#8]       | 0.9717 | [#6X2][#6H1][#6X2]                | 0.0    |
| [CH3][#6][#8]              | 0.9704 | [CX2H0](#[CX2H1])[CX2H0]          | 0.0    |
| [#6H3][#6H0]               | 0.9627 | CC=CCC#C                          | 0.0    |
| [#6H0]([#6H3])([#6H3])[#8] | 0.9389 | [CX3H0](=[CX3H1])([OX2H0])[CX2H0] | 0.0    |
| worst negatives            | prob   | worst positives                   | prob   |
| [#6H1]                     | 0.5702 | [CX4H3][CX4H0]([CX4H3])[OX2H0]    | 0.9098 |
| [CX4H]O                    | 0.5465 | [CX4H3][CX4H0][CX4H3]             | 0.9222 |
| [#8][#6][#6H2]             | 0.4975 | [#6H0]([#6H3])([#6H3])[#8]        | 0.9389 |
| [#8][#6H0][#6H1]           | 0.2987 | [#6H3][#6H0]                      | 0.9627 |
| [CX4H3][CX4H1]             | 0.2463 | [CH3][#6][#8]                     | 0.9704 |
| [OX2H0][CX4H1][OX2H0]      | 0.1506 | [#6H3][#8][#6H0][#8]              | 0.9717 |
| OCC[CH2]                   | 0.1153 | [#6H3][#6][#6]                    | 0.9887 |
| [#8][#6H1][#6H1]           | 0.1044 | [CX4H3][OX2H0]                    | 0.9935 |
| [#8][#6][#6][#8]           | 0.0941 | [CX4H3][CX4H0]                    | 0.9935 |
| [#6H3][#6H0]([#6H2])[#6H2] | 0.0532 | [CX4H3][CX4]O                     | 0.9995 |

---

Example 182 true smiles: C=C(C)C(=O)O formula: C4H6O2  
 Index of correct structure: 0 of 68  
 True structure loss: 0.034097  
 True structure:

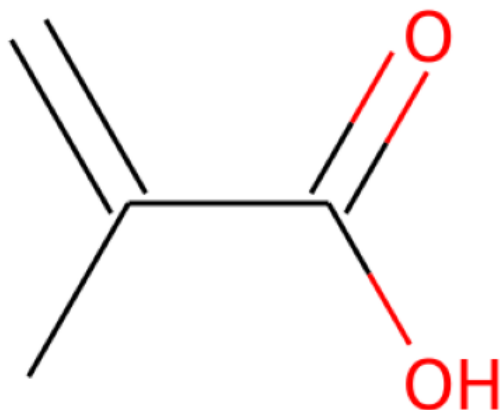

Experimental <sup>13</sup>C NMR (solvent: CDCl<sub>3</sub>)

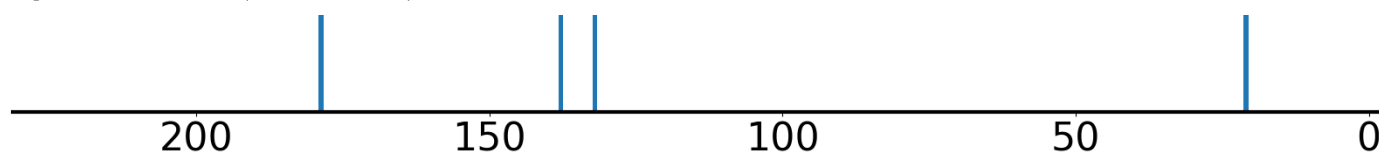

Experimental <sup>1</sup>H NMR (solvent: D<sub>2</sub>O)

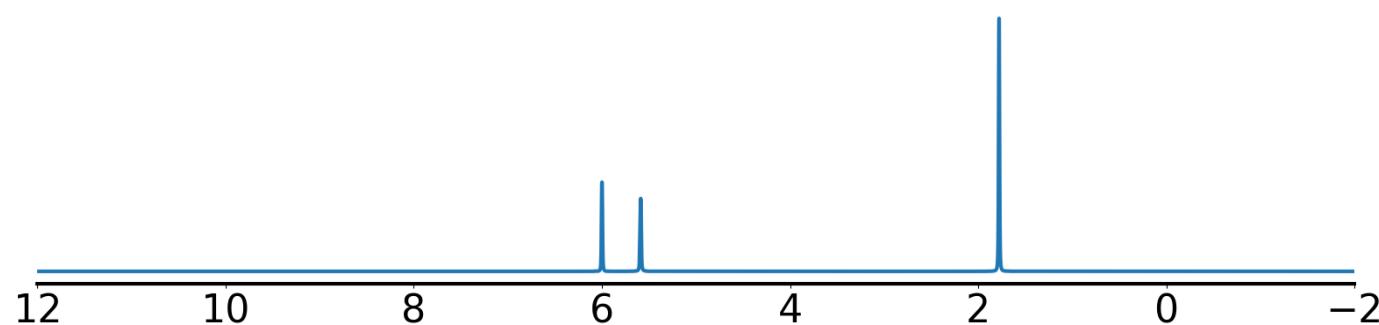

Top predicted structures (loss):

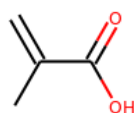

0.034097

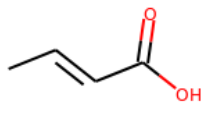

0.037208

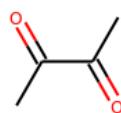

0.084706

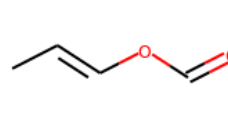

0.089645

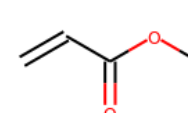

0.095468

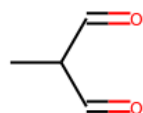

0.113819

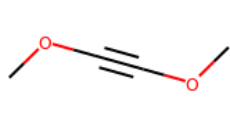

0.123603

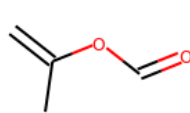

0.127293

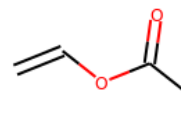

0.134404

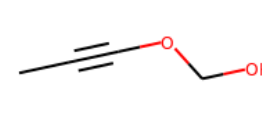

0.141415

Top predicted substructures  
[CX4H3]  
[CX4H3][#6]  
[CX4H3][CX3]

prob  
 0.9997  
 0.9997  
 0.9997

[#6H3][#6]=[#6X3]  
[#6H1]  
[OX2H1]

0.9926  
 0.9866  
 0.9865

|                                   |        |                                   |        |
|-----------------------------------|--------|-----------------------------------|--------|
| [CX3](=O)[OX2H1]                  | 0.9976 | [#8]=[#6][#8]                     | 0.9827 |
| [CX3](=[OX1])C                    | 0.9935 | [CX3](=[OX1])O                    | 0.9798 |
| best positives                    | prob   | best negatives                    | prob   |
| [CX4H3]                           | 0.9997 | [CX2H0](#[CX2H1])[CX4H0]          | 0.0    |
| [CX4H3][#6]                       | 0.9997 | [CX2H0](#[CX2H1])[CX4H2]          | 0.0    |
| [CX4H3][CX3]                      | 0.9997 | [#6H2][#6][#6X2]                  | 0.0    |
| [CX3](=O)[OX2H1]                  | 0.9976 | [CX2H0](#[CX2H0])[CX2H0]          | 0.0    |
| [CX3](=[OX1])C                    | 0.9935 | [CX2H0](#[CX2H1])[CX4H1]          | 0.0    |
| [#6H3][#6]=[#6X3]                 | 0.9926 | CCC#CC#C                          | 0.0    |
| [OX2H1]                           | 0.9865 | [#6X2][#6H1][#6X2]                | 0.0    |
| [#8]=[#6][#8]                     | 0.9827 | [CX2H1]#[CX2H0][CX3H1]=[CX3H0]    | 0.0    |
| [CX3](=[OX1])O                    | 0.9798 | [CX2H0](#[CX2H1])[CX2H0]          | 0.0    |
| [#6X3][#6X3]                      | 0.9742 | [CX2H0](#[CX2H1])[CX3H0]          | 0.0    |
| worst negatives                   | prob   | worst positives                   | prob   |
| [#6H1]                            | 0.9866 | [CX3H2]=[CX3H0]                   | 0.2111 |
| [CHX3](=C)C                       | 0.9658 | [CH2X3](=C)                       | 0.3434 |
| O=[#6][#6][#6X3]                  | 0.7783 | [CH3]CC[OH]                       | 0.3681 |
| [CX3H1](=[CX3H1])[CX4H3]          | 0.563  | [#6X3H2]                          | 0.3915 |
| [CX3H0](=[OX1H0])([OX2H1])[CX4H1] | 0.5421 | [CX3H2]=[CX3H0][CX3]=O            | 0.4052 |
| [#6X3][#6]=[#6][#6H3]             | 0.5275 | [CX4H3][CX3H0]                    | 0.4053 |
| [#8]=[#6H0][#6H1]                 | 0.4829 | [CX3H2]=[CX3H0]([#6])[#6]         | 0.4073 |
| [#8][#6H0][#6H1]                  | 0.4816 | [#6H3][#6H0]                      | 0.4215 |
| [#6X3H1][#6X3H0]                  | 0.4309 | [CX3H0](=[CX3H2])([CX4H3])[CX3H0] | 0.4381 |
| [CHX3]=[CHX3]                     | 0.3962 | [CX4H3][CX3H0]=[CX3H2]            | 0.4399 |

---

Example 183 true smiles: C1=COCC1 formula: C5H8O  
 Index of correct structure: 0 of 66  
 True structure loss: 0.00998  
 True structure:

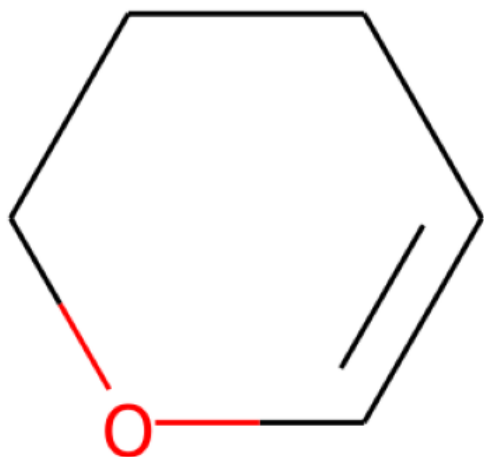

Experimental <sup>13</sup>C NMR (solvent: CDCl<sub>3</sub>)

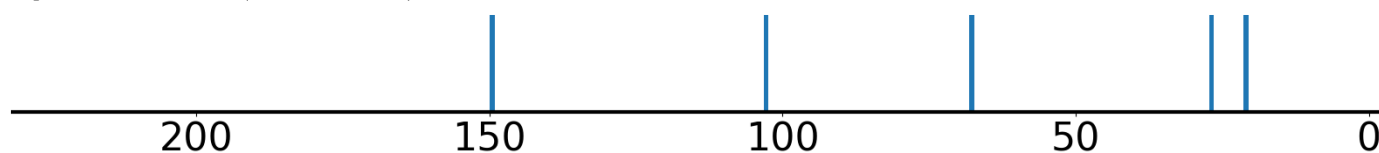

Experimental <sup>1</sup>H NMR (solvent: CDCl<sub>3</sub>)

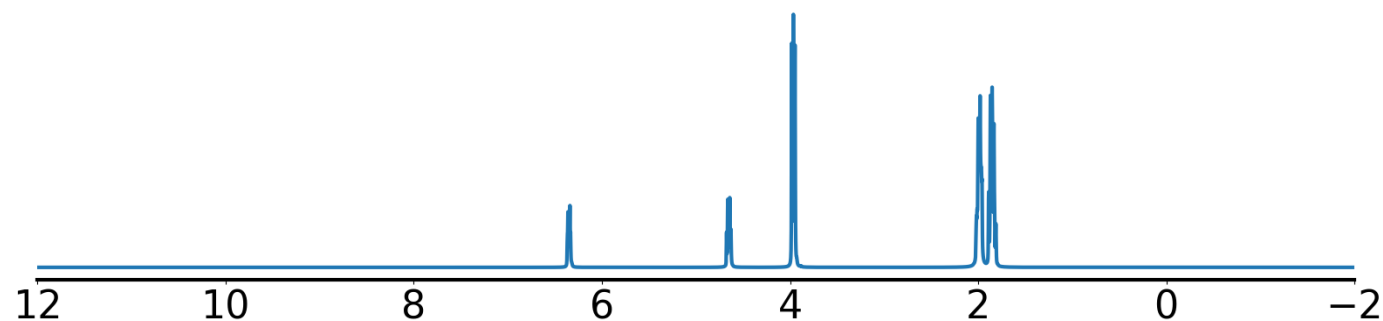

Top predicted structures (loss):

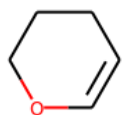

0.00998

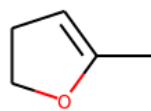

0.077758

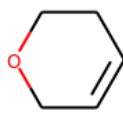

0.08154

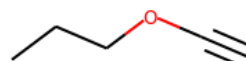

0.103122

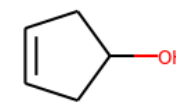

0.1057

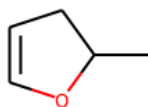

0.116916

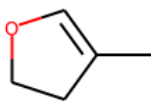

0.118393

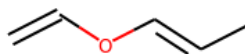

0.120263

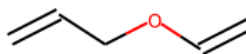

0.123239

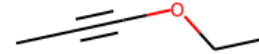

0.127778

Top predicted substructures  
 [CX4H2]([#6])[#6]  
 [CHX3](=C)C  
 [CX4H2]([#6])[O]

prob  
 0.9973  
 0.9936  
 0.9934

[CH2X4](O)[CX4H2][CX4H2]  
 [O][CX3H1]=[CX3H1]  
 [OX2H0][CX4H2][CX4H2][CX4H2]

0.9545  
 0.9385  
 0.9379



|                              |        |                                        |        |
|------------------------------|--------|----------------------------------------|--------|
| [#6H1]                       | 0.9896 | [CX4H2][CX3]=C                         | 0.9142 |
| [#8]1[#6][#6][#6][#6]=[#6]1  | 0.9723 | [CX4H2][CX4H2]                         | 0.9131 |
| best positives               | prob   | best negatives                         | prob   |
| [CX4H2]([#6])[#6]            | 0.9973 | [CX2H0](#[CX2H1])[cX3H0]               | 0.0    |
| [CHX3](=C)C                  | 0.9936 | [OX1H0]=[CX3H0]1[CX4H1][CX4H1][CX4H2]1 | 0.0    |
| [CX4H2]([#6])[O]             | 0.9934 | [CX3H1](=[CX3H2])[cX3H0]               | 0.0    |
| [#6H1]                       | 0.9896 | CC#CCC#C                               | 0.0    |
| [#8]1[#6][#6][#6][#6]=[#6]1  | 0.9723 | [CX2H0](#[CX2H1])[CX4H0]               | 0.0    |
| [CH2X4](O)[CX4H2][CX4H2]     | 0.9545 | [#7][#6][#6]#[#7]                      | 0.0    |
| [O][CX3H1]=[CX3H1]           | 0.9385 | [#6X2][#6H1][#6X2]                     | 0.0    |
| [OX2H0][CX4H2][CX4H2][CX4H2] | 0.9379 | [CX4H2]([CX4H0])[CX2H0]                | 0.0    |
| [CX4H2][CX3]=C               | 0.9142 | [#7][#6]=[#6][#6]#[#7]                 | 0.0    |
| [CX4H2][CX4H2]               | 0.9131 | CCC#CC#C                               | 0.0    |
| worst negatives              | prob   | worst positives                        | prob   |
| [CX4H3]                      | 0.5509 | [CX4H2]([CX4H2])[CX3H1]                | 0.6603 |
| [CX4H3][#6]                  | 0.5227 | [CHX3]=[CHX3]                          | 0.6832 |
| [CX4H3][CX3]                 | 0.3269 | [CX4H2]([OX2H0])[CX4H2]                | 0.745  |
| [#6H3][#6]=[#6X3]            | 0.2898 | OCC[CH2]                               | 0.7567 |
| [CH3][#6][#8]                | 0.2083 | [CX4H2][CX3H]                          | 0.7916 |
| [#8][#6][#6]=[#6X3]          | 0.1956 | [CH2X4](O)[CX4H2]                      | 0.795  |
| C10CCC1                      | 0.1729 | [CX3H1](=[CX3H1])[CX4H2]               | 0.7967 |
| [#6X3][#6H2][#8]             | 0.1534 | [#6H2][#8][#6H1]                       | 0.7991 |
| [CX4H3][CX3H0]               | 0.1265 | [CX3H]O[CX4H2]                         | 0.8047 |
| CCCCC=C                      | 0.1231 | [CX4H2]([CX4H2])[CX4H2]                | 0.8114 |

---

Example 184 true smiles: O=Cc1ccco1 formula: C5H4O2  
 Index of correct structure: 0 of 65  
 True structure loss: 0.026066  
 True structure:

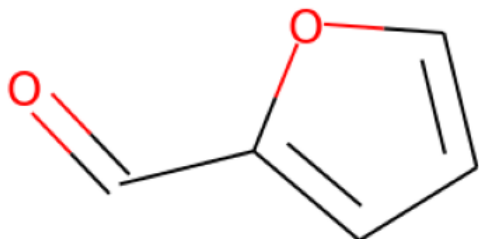

Experimental 13C NMR (solvent: CDCl3)

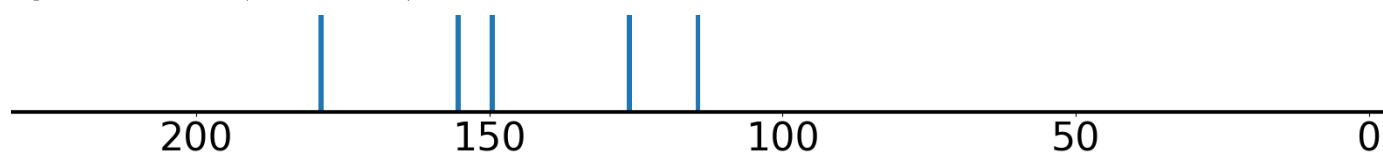

Experimental 1H NMR (solvent: D2O)

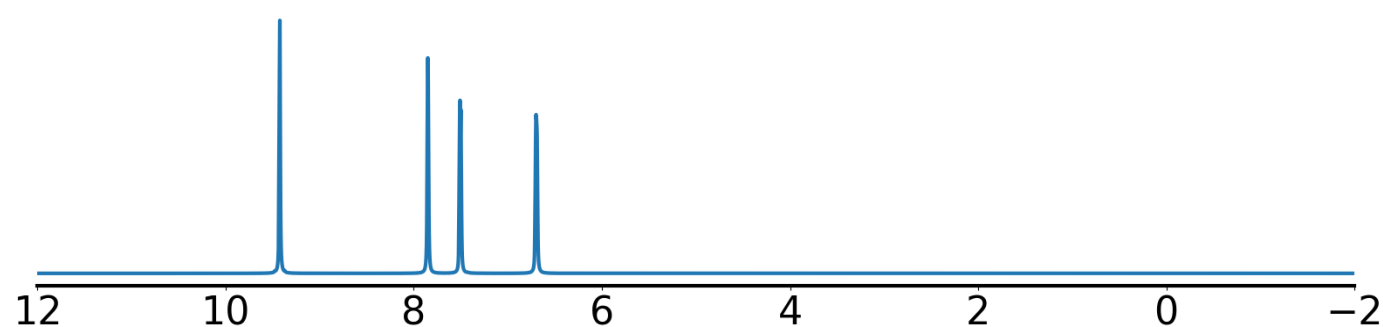

Top predicted structures (loss):

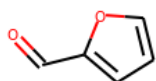

0.026066

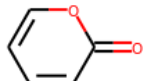

0.042903

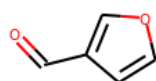

0.043117

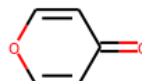

0.054581

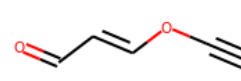

0.087684

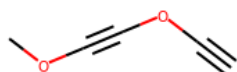

0.095056

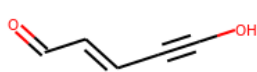

0.100161

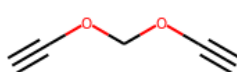

0.110948

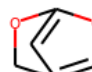

0.110953

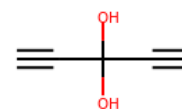

0.11748

Top predicted substructures  
 [#6H1]  
 [#6X3][#6X3]  
 [CX3H1](=O)[#6]

prob  
 1.0  
 0.9998  
 0.9664

[cX3H1]([cX3H1])[cX3H1]  
 [#6X3H1][#6X3H0]  
 [#8]=[#6][#8]

0.8774  
 0.848  
 0.7761

|                          |        |                                           |        |
|--------------------------|--------|-------------------------------------------|--------|
| [cH][cH]                 | 0.9129 | [cH]                                      | 0.773  |
| [#6H1][#6H1]             | 0.9086 | [cX3H1]([cX3H1])[cX3H0]                   | 0.7308 |
| best positives           | prob   | best negatives                            | prob   |
| [#6H1]                   | 1.0    | [OX2H0]1[cX4H2][cX4H2][cX4H1][cX4H1]1     | 0.0    |
| [#6X3][#6X3]             | 0.9998 | [#6H3][#6H2][#6H1r4]                      | 0.0    |
| [cX3H1](=0)[#6]          | 0.9664 | [cX2H0](#[cX2H1])[cX4H0]                  | 0.0    |
| [cH][cH]                 | 0.9129 | [cX4H0]([cX4H3])([cX4H2])([cX4H1])[cX4H1] | 0.0    |
| [#6H1][#6H1]             | 0.9086 | [cX4H0]([NX3H1])([cX4H2])([cX4H2])[cX4H1] | 0.0    |
| [cX3H1]([cX3H1])[cX3H1]  | 0.8774 | [cX4H0]([NX3H1])([cX4H3])([cX4H2])[cX4H1] | 0.0    |
| [#6X3H1][#6X3H0]         | 0.848  | [cX4H1]([NX3H1])([cX4H3])[cX4H2]          | 0.0    |
| [cH]                     | 0.773  | [#6H3][#6H0][#7][#6H3]                    | 0.0    |
| [cX3H1]([cX3H1])[cX3H0]  | 0.7308 | [cX4H1]([NX3H0])([cX4H3])[cX4H1]          | 0.0    |
| [#8][#6][#6][#6X3]       | 0.665  | [OX2H0][cX4H2][cX4H1]([cX4H1])[cX4H3]     | 0.0    |
| worst negatives          | prob   | worst positives                           | prob   |
| [#8]=[#6][#8]            | 0.7761 | [#8][#6][#6]=[#8]                         | 0.0584 |
| O=[#6][#6]=[#6X3]        | 0.5884 | [cX3H1]([OX2H0])[cX3H1]                   | 0.1085 |
| [cX3]([OX1])C            | 0.5206 | [#8][#6H][#6X3][#6X3H]                    | 0.179  |
| [CHX3](=C)C              | 0.4888 | o[cH]                                     | 0.2269 |
| [cX3]([OX1])O            | 0.4678 | [#8][#6H1][#6H1]                          | 0.3274 |
| [cX3]([OX1])OX2H1        | 0.4635 | [#6X3H1][#6X3H1][#6X3H0][#6X3H1]          | 0.3378 |
| [#8]=[#6H][#6X3]=[#6X3H] | 0.3871 | O=[#6][#6][#6X3]                          | 0.3909 |
| [CHX3]=[CHX3]            | 0.3216 | [#8]=[#6H][#6X3][#6X3H]                   | 0.4438 |
| [#8]=[#6H1][#6H1]        | 0.3098 | [#8][#6H0][#6H1]                          | 0.596  |
| O=c[cX3H]                | 0.285  | [#6X3][#6X3][#6X3][#6X3]                  | 0.6117 |

---

Example 185 true smiles: CC(C)=CCO formula: C5H10O  
 Index of correct structure: 0 of 65  
 True structure loss: 0.007174  
 True structure:

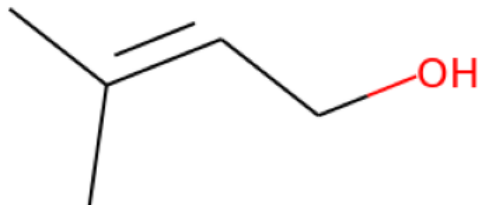

Experimental <sup>13</sup>C NMR (solvent: CDCl<sub>3</sub>)

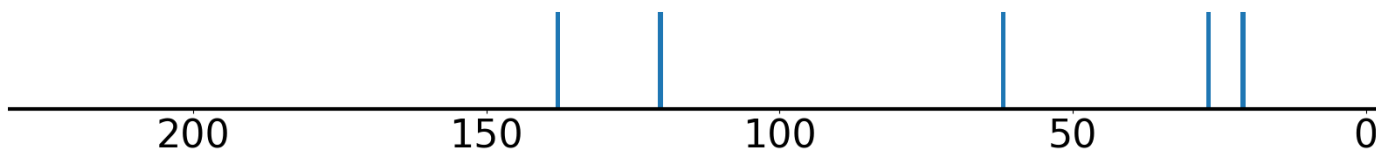

Experimental <sup>1</sup>H NMR (solvent: CDCl<sub>3</sub>)

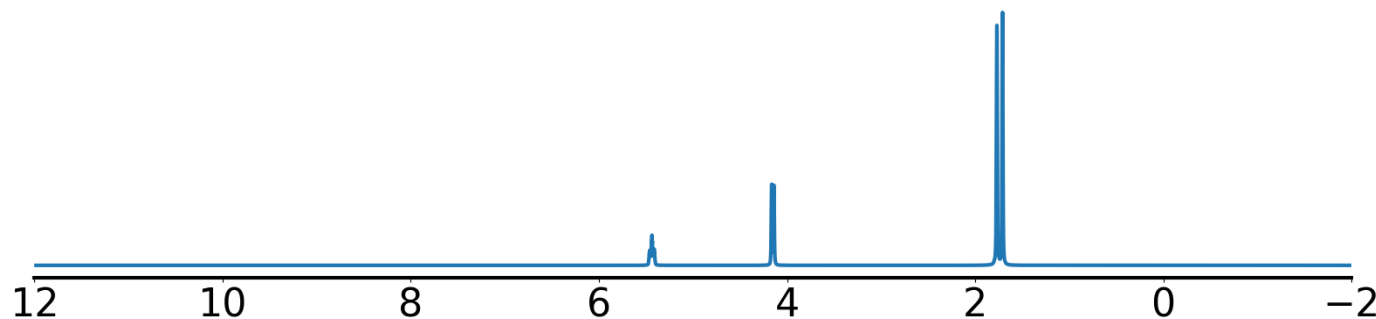

Top predicted structures (loss):

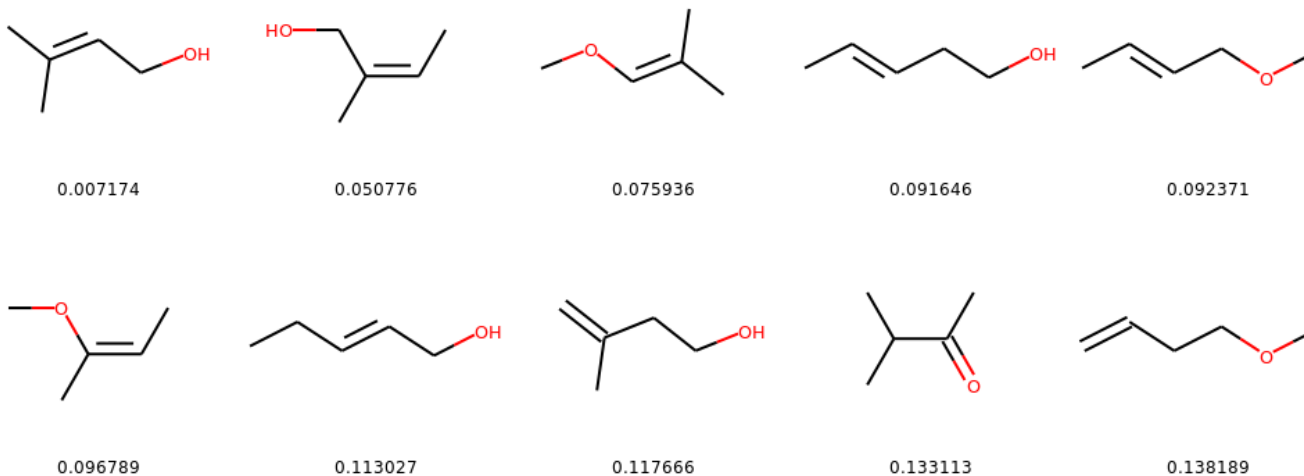

Top predicted substructures  
 [CX4H3]  
 [CX4H3][CX3]  
 [#6H3][#6H0]

prob  
 1.0  
 1.0  
 0.998

[#6H3][#6][#6]  
 [#8][#6H2][#6H1]=[#6H0]  
 [CHX3](=C)C

0.9927  
 0.9879  
 0.9836

|                          |        |                                   |        |
|--------------------------|--------|-----------------------------------|--------|
| [CX4H3][CX3H0]           | 0.9978 | [CX4H2](#[6])[O]                  | 0.9772 |
| [CX4H3][#6]              | 0.9962 | #[6H1]                            | 0.9699 |
| best positives           | prob   | best negatives                    | prob   |
| [CX4H3]                  | 1.0    | [CX2H0](#[CX2H1])[CX3H0]          | 0.0    |
| [CX4H3][CX3]             | 1.0    | [CX2H0](#[CX2H1])[CX4H2]          | 0.0    |
| #[6H3][#6H0]             | 0.998  | CC#CC#C                           | 0.0    |
| [CX4H3][CX3H0]           | 0.9978 | [CX2H1]#[CX2H0][CX3H1]=[CX3H0]    | 0.0    |
| [CX4H3][#6]              | 0.9962 | C=CC=CC#C                         | 0.0    |
| #[6H3][#6][#6]           | 0.9927 | [CX2H0](#[CX2H0])[CX2H0]          | 0.0    |
| #[8][#6H2][#6H1]=[#6H0]  | 0.9879 | #[6X2][#6H1][#6X2]                | 0.0    |
| [CHX3](=C)C              | 0.9836 | [CX2H0](#[CX2H1])[CX4H0]          | 0.0    |
| [CX4H2](#[6])[O]         | 0.9772 | [OX1H0]=[CX3H0][CX2H0]#[CX2H1]    | 0.0    |
| #[6H1]                   | 0.9699 | [CX3H1](=[OX1H0])[CX2H0]          | 0.0    |
| worst negatives          | prob   | worst positives                   | prob   |
| [OX2H1][CX4H2][#6X3H0]   | 0.2203 | [CX4H2][CX3H]                     | 0.3513 |
| [CX4H2][CX4H2]           | 0.2134 | #[6H1][#6H2]                      | 0.5218 |
| #[6H3][#6]=[#6][#6H3]    | 0.1816 | [CX4H2](#[OX2H1])[CX3H1]          | 0.6781 |
| [OH][CX4H]               | 0.1804 | [CX4H3][CX3H0][CX4H3]             | 0.7829 |
| #[8][#6][#6][#6X3]       | 0.1365 | O[CX4H2][CX3H1]                   | 0.7858 |
| #[6H1][#6H1]             | 0.1291 | #[6X3][#6H2][#8]                  | 0.8034 |
| [CX4H3][CX3H1]           | 0.1207 | [CX3H0](=[CX3H1])([CX4H3])[CX4H3] | 0.8119 |
| #[6H3][#6X3H0][#6H2]     | 0.1066 | [CX4H2][CX3]=C                    | 0.8354 |
| [CX3H1](=[CX3H1])[CX4H3] | 0.1033 | #[8][#6H2][#6H]=[#6X3]            | 0.8539 |
| [CH2X4](O)[CX4H2]        | 0.0977 | #[8H][#6H2][#6H1]                 | 0.8616 |

---

Example 186 true smiles: CC(C)CC=O formula: C5H10O  
 Index of correct structure: 0 of 65  
 True structure loss: 0.01415  
 True structure:

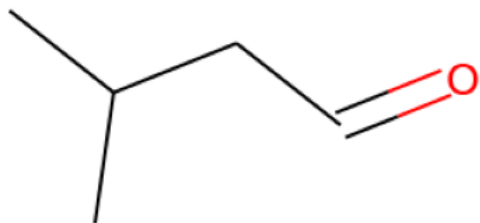

Experimental 13C NMR (solvent: CDCl3)

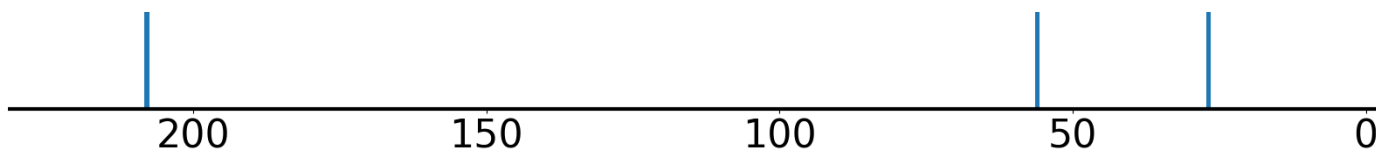

Experimental 1H NMR (solvent: D2O)

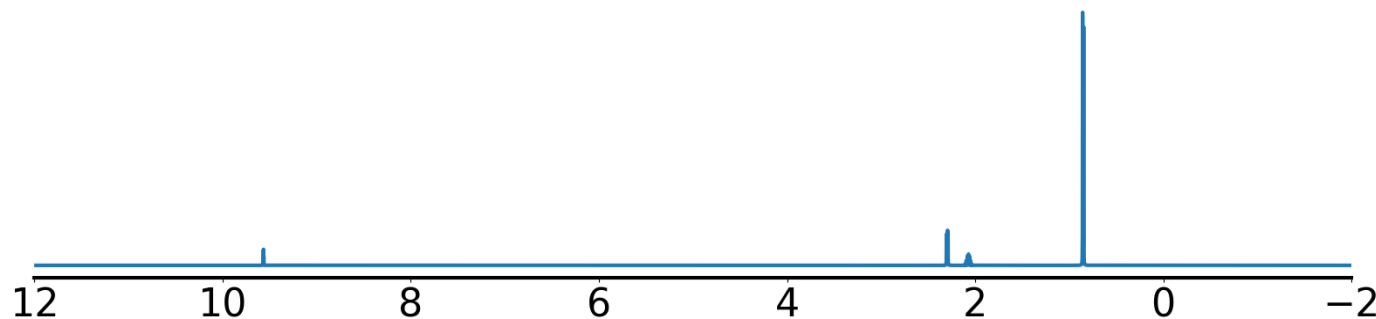

Top predicted structures (loss):

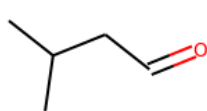

0.01415

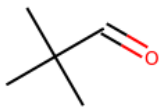

0.030954

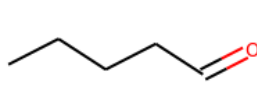

0.048717

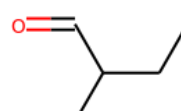

0.067829

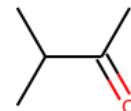

0.071756

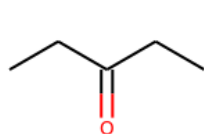

0.081982

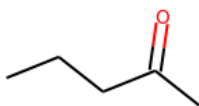

0.100525

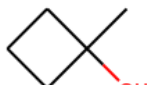

0.156875

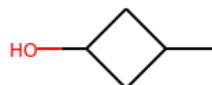

0.172101

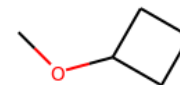

0.176257

Top predicted substructures  
 [CX4H3]  
 [CX3H1](=O)[#6]  
 [CX3](=[OX1])C

prob  
 0.9998  
 0.9997  
 0.9995

[#6H1]  
 [CX4H1]([CX4H3])([CX4H3])[CX4H2]  
 [#6X3][#6][#6][#6H3]

0.9919  
 0.9165  
 0.9031

|                                  |        |                                   |        |
|----------------------------------|--------|-----------------------------------|--------|
| [#6H3][#6][#6]                   | 0.9994 | [CHX4]([CH3X4])[CH3X4]            | 0.8389 |
| [CX4H3][#6]                      | 0.9985 | [#6H1][#6H2]                      | 0.6827 |
| best positives                   | prob   | best negatives                    | prob   |
| [CX4H3]                          | 0.9998 | [CX3H0](=[CX3H1])([OX2H0])[CX2H0] | 0.0    |
| [CX3H1](=O)[#6]                  | 0.9997 | C=CC=CC#C                         | 0.0    |
| [CX3](=[OX1])C                   | 0.9995 | [CX2H0](#[CX2H1])[cX3H0]          | 0.0    |
| [#6H3][#6][#6]                   | 0.9994 | [CX2H1]#[CX2H0][CX3H1]=[CX3H0]    | 0.0    |
| [CX4H3][#6]                      | 0.9985 | CCC#CC#C                          | 0.0    |
| [#6H1]                           | 0.9919 | CCC=CC#C                          | 0.0    |
| [CX4H1]([CX4H3])([CX4H3])[CX4H2] | 0.9165 | C=CCC#C                           | 0.0    |
| [#6X3][#6][#6][#6H3]             | 0.9031 | CCC#CC=C                          | 0.0    |
| [CHX4]([CH3X4])[CH3X4]           | 0.8389 | CC=CC#CC                          | 0.0    |
| [#6H1][#6H2]                     | 0.6827 | [CX4H1]([OX2H0])([CX4H2])[CX2H0]  | 0.0    |
| worst negatives                  | prob   | worst positives                   | prob   |
| [CX4H2]CC=O                      | 0.3359 | [CX4H2]([CH])[CH]                 | 0.1769 |
| [#6H3][#6H0]                     | 0.2868 | [OX1H0]=[CX3H1][CX4H2][CX4H1]     | 0.2552 |
| O=[CX3][CX4H]                    | 0.2263 | [CX3H1](=[OX1H0])[CX4H2]          | 0.2966 |
| [CX4H3][CX4H0][CX4H3]            | 0.1848 | [CX4H2][CX3H]                     | 0.297  |
| [#8]=[#6H1][#6H1]                | 0.1038 | [#8]=[#6][#6H2][#6H1]             | 0.353  |
| [CX4H2]([CX4H1])[CX3H0]          | 0.0991 | [CX4H2]([CX4H1])[CX3H1]           | 0.4448 |
| [#6X3H1][#6H1][#6H2]             | 0.0932 | [CHX4]([CH3X4])[CH2X4]            | 0.4657 |
| O=[CX3H0][CX4H2][CX4H1]          | 0.07   | [CX4H2][CX3]=O                    | 0.4971 |
| [CX3H][CX4H]                     | 0.0659 | [CX4H2]([#6])[#6]                 | 0.5473 |
| [#6H1][#6H1]                     | 0.0595 | [CX4H3][CX4H1]                    | 0.556  |

---

Example 187 true smiles: OCC1CCC1 formula: C5H10O  
 Index of correct structure: 0 of 65  
 True structure loss: 0.010513  
 True structure:

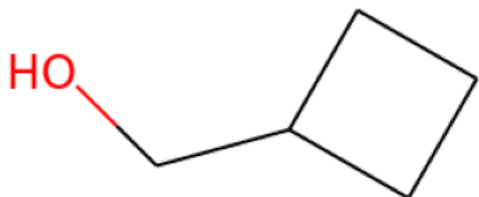

Experimental 13C NMR (solvent: CDCl3)

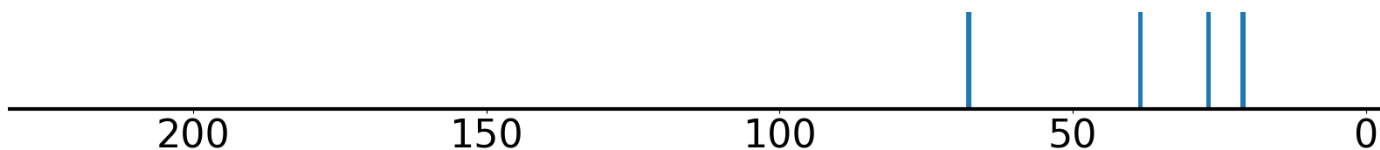

Experimental 1H NMR (solvent: CDCl3)

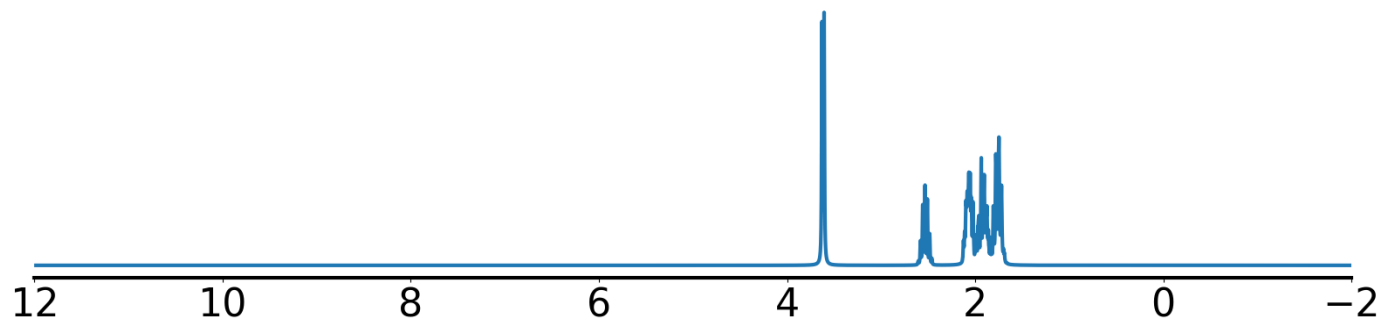

Top predicted structures (loss):

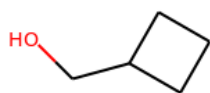

0.010513

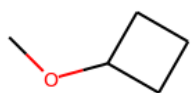

0.045102

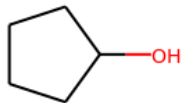

0.046123

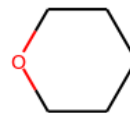

0.055905

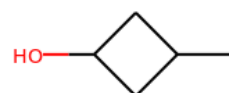

0.084224

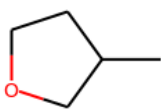

0.08514

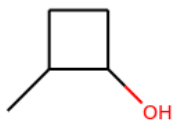

0.089069

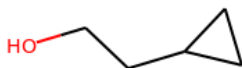

0.092136

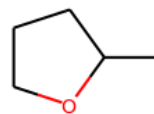

0.105299

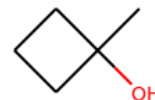

0.108361

Top predicted substructures  
 [CX4H2]([#6])[#6]  
 [CX4H2]([#6])[O]  
 [OX2H1]

prob  
 1.0  
 0.9711  
 0.9696

[CX4H1]1[CX4H2][CX4H2][CX4H2]1  
 [#6H1][#6H2]  
 [CX4H2][CX4H2]

0.8752  
 0.8618  
 0.8589



|                                |        |                                       |        |
|--------------------------------|--------|---------------------------------------|--------|
| OCC[CH2]                       | 0.9691 | C1CCC1                                | 0.8499 |
| [CX4H2]([CX4H2])[CX4H1]        | 0.9639 | [CX4H2]([OX2H1])[CX4H1]               | 0.8369 |
| best positives                 | prob   | best negatives                        | prob   |
| [CX4H2]([#6])[#6]              | 1.0    | C=CC=CC#C                             | 0.0    |
| [CX4H2]([#6])[O]               | 0.9711 | [CX3H0](=[CX3H1])([OX2H0])[CX2H0]     | 0.0    |
| [OX2H1]                        | 0.9696 | [CX3H0](=[CX3H1])([CX4H1])[CX2H0]     | 0.0    |
| OCC[CH2]                       | 0.9691 | [CX2H1]#[CX2H0][CX3H1]=[CX3H0]        | 0.0    |
| [CX4H2]([CX4H2])[CX4H1]        | 0.9639 | CC#CCC=C                              | 0.0    |
| [CX4H1]1[CX4H2][CX4H2][CX4H2]1 | 0.8752 | [CX3H0](=[CX3H2])([CX4H1])[CX3H1]     | 0.0    |
| [#6H1][#6H2]                   | 0.8618 | [CX3H1](=[CX3H2])[CX3H0]              | 0.0    |
| [CX4H2][CX4H2]                 | 0.8589 | [CX2H0](#[CX2H1])[CX3H0]              | 0.0    |
| C1CCC1                         | 0.8499 | [CX3H0](=[CX3H1])([CX4H2])[CX2H0]     | 0.0    |
| [CX4H2]([OX2H1])[CX4H1]        | 0.8369 | [CX2H0](#[CX2H1])[CX4H0]              | 0.0    |
| worst negatives                | prob   | worst positives                       | prob   |
| CCCCC                          | 0.6896 | [CX4H2](O)[CHX4]                      | 0.4939 |
| [#8][#6][#6H2]                 | 0.5911 | [OX2H1][CX4H2][CX4H1]([CX4H2])[CX4H2] | 0.6199 |
| [#6H2][#6H1][#6H1][#6H2]       | 0.3961 | [CX4H1]([CX4H2])([CX4H2])[CX4H2]      | 0.63   |
| [#6H1][#6H1]                   | 0.2758 | [#6H1]([#6H2])[#6H2]                  | 0.6596 |
| [CH2X4](O)[CX4H2]              | 0.1841 | [#8H][#6H2][#6H1]                     | 0.6865 |
| [CX4H3][#6]                    | 0.1803 | [#6H1]                                | 0.7794 |
| [CX4H]O                        | 0.1787 | [CX4H2]([CX4H2])[CX4H2]               | 0.8243 |
| O[CX4H][CX4H2]                 | 0.1749 | [CX4H2]([OX2H1])[CX4H1]               | 0.8369 |
| [CX4H1][CX4H2][CX4H2][CX4H1]   | 0.1528 | C1CCC1                                | 0.8499 |
| [CX4H2][CX4H2][CX4H2][CX4H2]   | 0.1248 | [CX4H2][CX4H2]                        | 0.8589 |

---

Example 188 true smiles: C=CC(C)CO formula: C5H10O  
 Index of correct structure: 0 of 65  
 True structure loss: 0.008143  
 True structure:

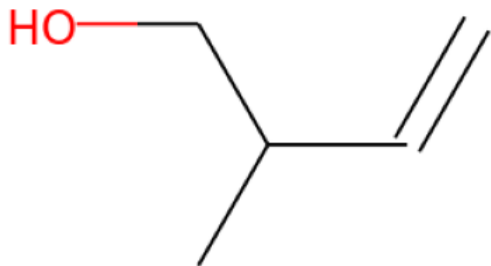

Experimental 13C NMR (solvent: CDCl3)

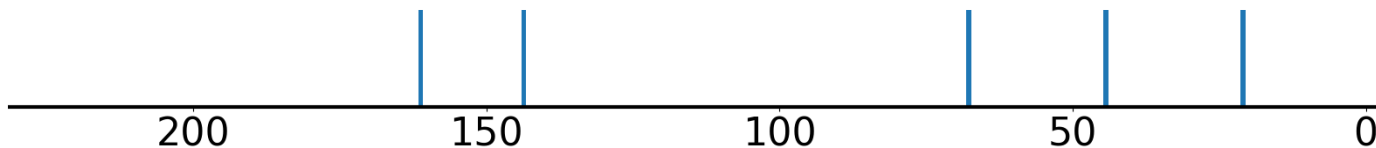

Experimental 1H NMR (solvent: CDCl3)

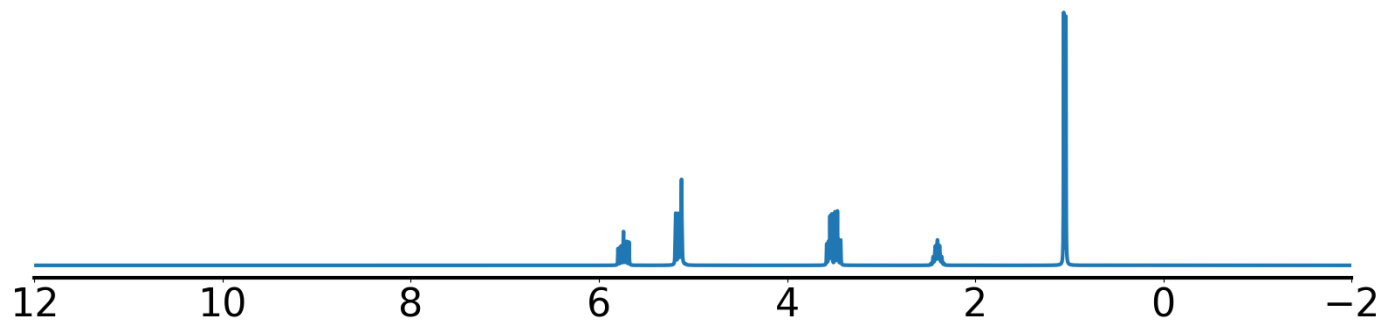

Top predicted structures (loss):

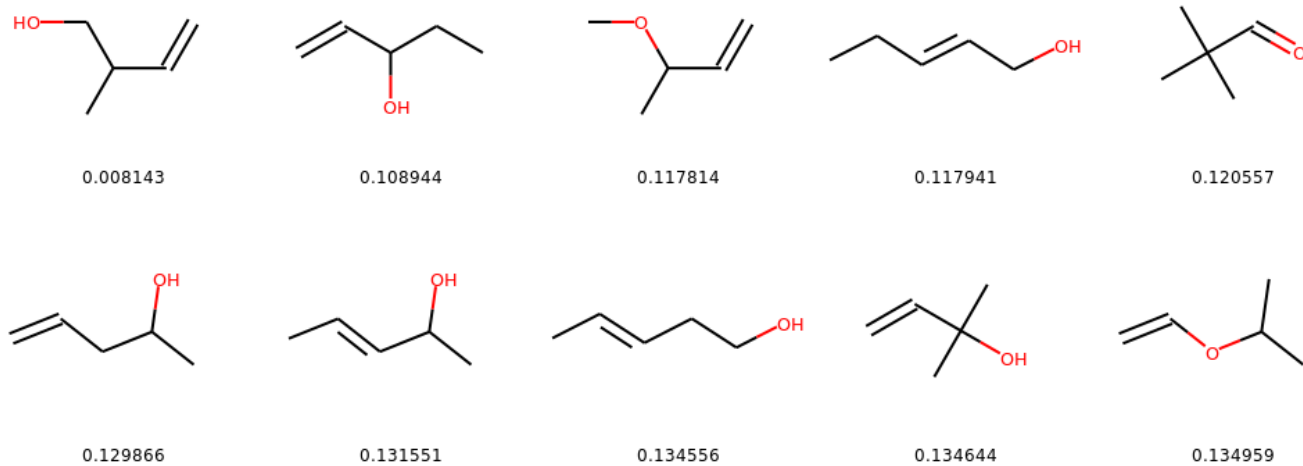

Top predicted substructures  
 [CX4H3][#6]  
 [CX4H3]  
 [#6H1]

prob  
 1.0  
 1.0  
 0.9999

[#6X3]=[#6][#6][#6H3]  
 [OX2H1]  
 [#8H][#6H2][#6H1]

0.9972  
 0.9912  
 0.981

|                          |        |                                   |        |
|--------------------------|--------|-----------------------------------|--------|
| [#6H3][#6][#6]           | 0.9998 | [CH3]CC[OH]                       | 0.9591 |
| [CHX3](=C)C              | 0.9994 | [CX3H][CX4H]                      | 0.9588 |
| best positives           | prob   | best negatives                    | prob   |
| [CX4H3][#6]              | 1.0    | [CX2H0](#[CX2H1])[CX4H2]          | 0.0    |
| [CX4H3]                  | 1.0    | [#6X2][#6H1][#6X2]                | 0.0    |
| [#6H1]                   | 0.9999 | [CX2H0](#[CX2H1])[CX4H0]          | 0.0    |
| [#6H3][#6][#6]           | 0.9998 | C=CC=CC#C                         | 0.0    |
| [CHX3](=C)C              | 0.9994 | CCC#CCC                           | 0.0    |
| [#6X3]=[#6][#6][#6H3]    | 0.9972 | CCC#CC#C                          | 0.0    |
| [OX2H1]                  | 0.9912 | [CX4H3][CX2H0]                    | 0.0    |
| [#8H][#6H2][#6H1]        | 0.981  | [CX2H0](#[CX2H1])[cX3H0]          | 0.0    |
| [CH3]CC[OH]              | 0.9591 | CC#CCC#C                          | 0.0    |
| [CX3H][CX4H]             | 0.9588 | [CX3H0](=[CX3H1])([OX2H0])[CX2H0] | 0.0    |
| worst negatives          | prob   | worst positives                   | prob   |
| [#8]=[#6][#8]            | 0.3084 | [CX4H2](O)[CHX4]                  | 0.5132 |
| [CHX3]=[CHX3]            | 0.2143 | [CHX4]([CH3X4])[CH2X4]            | 0.6089 |
| [CX3H1](=[CX3H1])[CX4H1] | 0.1968 | [#6H1][#6H2]                      | 0.6395 |
| [#6H3][#6H0]             | 0.1871 | [#6H1][#6H1]                      | 0.6582 |
| [#8][#6][#6]=[#6X3]      | 0.149  | [#8][#6][#6][#6X3]                | 0.6987 |
| [#6H3][#6][#6][#6H3]     | 0.1465 | [#6H2][#6H1][#6H1]=[#6H2]         | 0.7282 |
| [#6H3][#6]=[#6X3]        | 0.1391 | [#6X3H1][#6H1][#6H2]              | 0.7728 |
| [#8][#6H0][#6H1]         | 0.1364 | [#8][#6H2][#6H][#6X3]             | 0.857  |
| [#6X3][#6][#6][#6H3]     | 0.1224 | [CX3H2]=[CX3H1]                   | 0.8646 |
| [#8][#6H2][#6H1][#6H0]   | 0.1183 | [CX4H2]([OX2H1])[CX4H1]           | 0.906  |

---

Example 189 true smiles: CN(C)C=O formula: C3H7NO  
 Index of correct structure: 0 of 59  
 True structure loss: 0.008732  
 True structure:

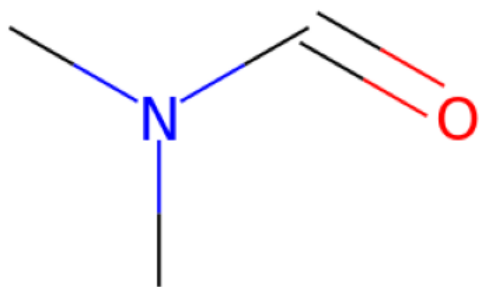

Experimental <sup>13</sup>C NMR (solvent: CDCl<sub>3</sub>)

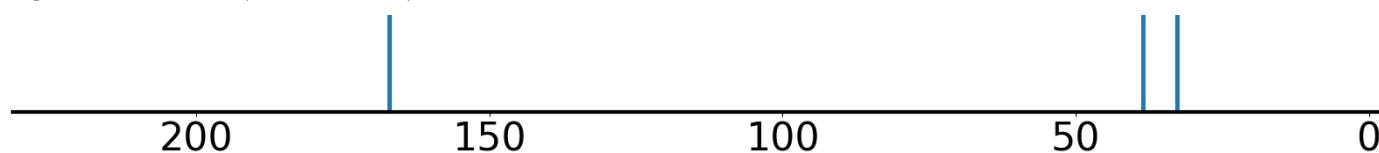

Experimental <sup>1</sup>H NMR (solvent: D<sub>2</sub>O)

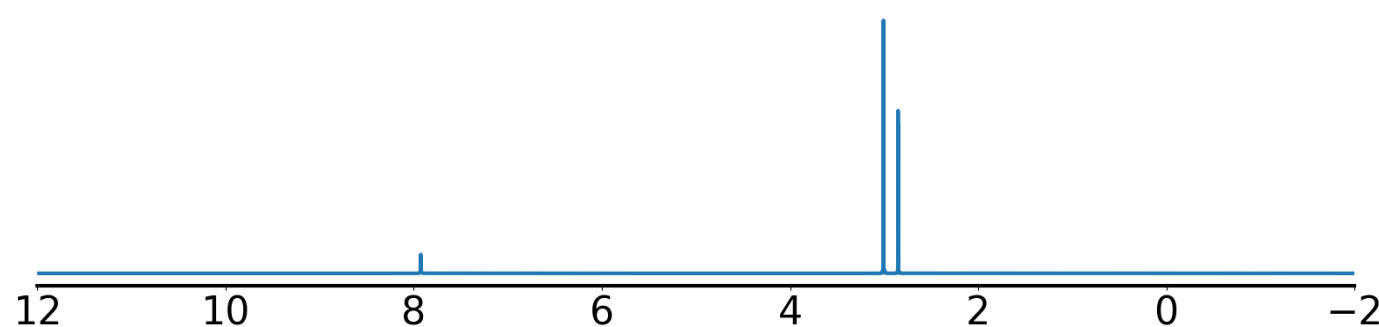

Top predicted structures (loss):

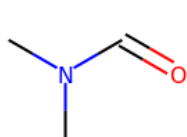

0.008732

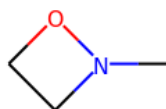

0.061035

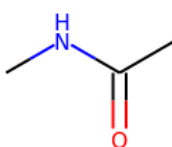

0.062484

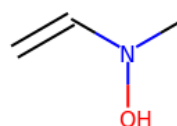

0.070628

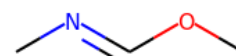

0.074575

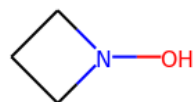

0.075067

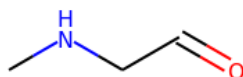

0.084416

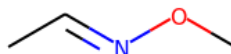

0.084549

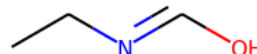

0.084706

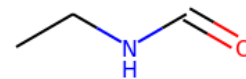

0.085229

Top predicted substructures

[#7X3][#6H3]  
 [#6H3][#7]  
 [CX4H3]

prob  
 0.9998  
 0.9995  
 0.9971

[#7X3H0]  
 [#8]=[#6H1][#7]  
 [#6H1]

0.7694  
 0.7625  
 0.7588

|                          |        |                                       |        |
|--------------------------|--------|---------------------------------------|--------|
| [#6H3][#7][#6X3]         | 0.9385 | [CX3H1](=[OX1H0])[NX3H0]              | 0.707  |
| [CX4H3][NX3H0]           | 0.8575 | [#6X3H1][#7X3H0]                      | 0.6201 |
| best positives           | prob   | best negatives                        | prob   |
| [#7X3][#6H3]             | 0.9998 | [CX2H0](#[CX2H1])[CX2H0]              | 0.0    |
| [#6H3][#7]               | 0.9995 | CCC#CC#C                              | 0.0    |
| [CX4H3]                  | 0.9971 | C=CCCC#C                              | 0.0    |
| [#6H3][#7][#6X3]         | 0.9385 | C=CC=CC#C                             | 0.0    |
| [CX4H3][NX3H0]           | 0.8575 | [CX2H0](#[CX2H1])[cX3H0]              | 0.0    |
| [#7X3H0]                 | 0.7694 | [CX4H1]([OX2H0])([CX4H2])[CX2H0]      | 0.0    |
| [#8]=[#6H1][#7]          | 0.7625 | [CX2H0](#[CX2H0])[CX2H0]              | 0.0    |
| [#6H1]                   | 0.7588 | CCC#CC=C                              | 0.0    |
| [CX3H1](=[OX1H0])[NX3H0] | 0.707  | [OX2H0]1[CX4H2][CX4H2][CX4H1][CX4H1]1 | 0.0    |
| [#6X3H1][#7X3H0]         | 0.6201 | CCC=CC#C                              | 0.0    |
| worst negatives          | prob   | worst positives                       | prob   |
| [CX3](=[OX1])C           | 0.4001 | [#6X3H1][#7X3H0]                      | 0.6201 |
| [OX2H1]                  | 0.3915 | [CX3H1](=[OX1H0])[NX3H0]              | 0.707  |
| [#7X3H1]                 | 0.3817 | [#6H1]                                | 0.7588 |
| [CX4H3][NX3H1]           | 0.3371 | [#8]=[#6H1][#7]                       | 0.7625 |
| [CX3](=[OX1])O           | 0.3302 | [#7X3H0]                              | 0.7694 |
| [#8]=[#6][#8]            | 0.2687 | [CX4H3][NX3H0]                        | 0.8575 |
| [#7][#6H0][#7]           | 0.2298 | [#6H3][#7][#6X3]                      | 0.9385 |
| [#7][#6]=[#7]            | 0.192  | [CX4H3]                               | 0.9971 |
| [CX4H2][CX3]=O           | 0.1911 | [#6H3][#7]                            | 0.9995 |
| [#6H3][#7][#6H2]         | 0.1903 | [#7X3][#6H3]                          | 0.9998 |

---

Example 190 true smiles: NCC(=O)O formula: C2H5NO2  
 Index of correct structure: 0 of 47  
 True structure loss: 0.010644  
 True structure:

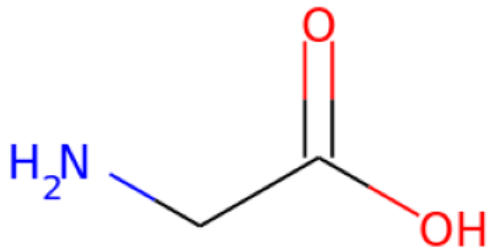

Experimental <sup>13</sup>C NMR (solvent: D2O)

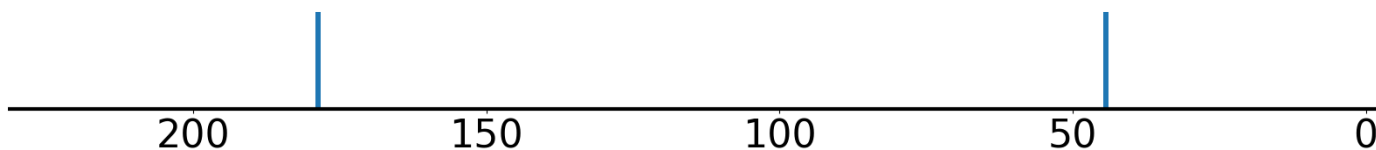

Experimental <sup>1</sup>H NMR (solvent: D2O)

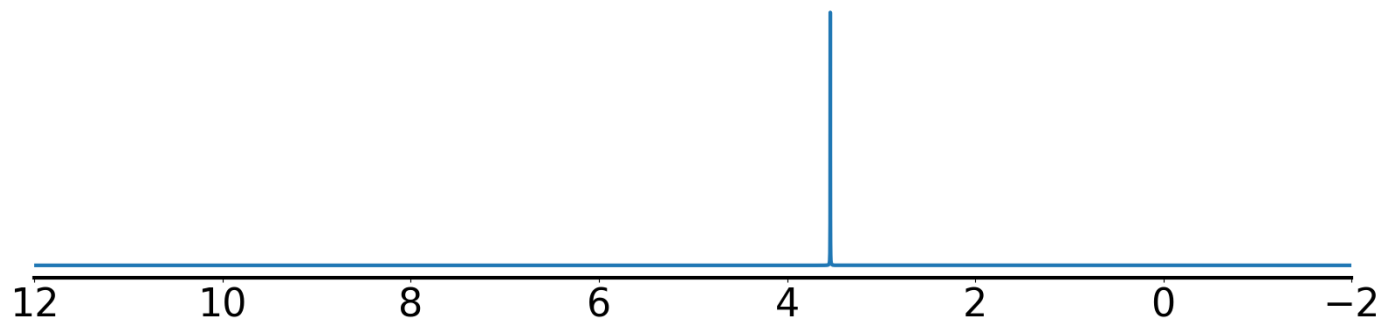

Top predicted structures (loss):

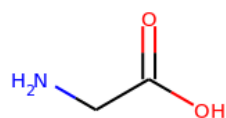

0.010644

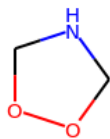

0.036594

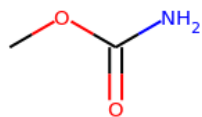

0.045586

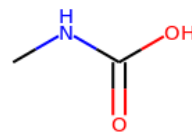

0.046442

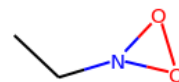

0.060313

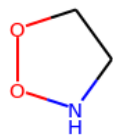

0.060766

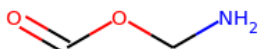

0.061471

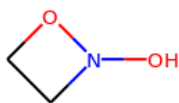

0.062799

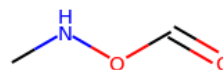

0.062933

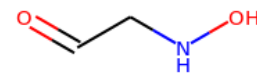

0.062987

Top predicted substructures

[CX3](=[OX1])C  
[#7X3][#6H2]  
[#8]=[#6][#8]

prob  
 0.9844  
 0.9755  
 0.9195

[CX4H2][CX3]=O  
[CX3](=[OX1])O  
[CX3](=O)[OX2H1]

0.8644  
 0.8606  
 0.8547

|                                   |        |                                   |        |
|-----------------------------------|--------|-----------------------------------|--------|
| [#7][#6H2]                        | 0.9154 | [CX3H0](=[OX1H0])([OX2H1])[CX4H2] | 0.8147 |
| [#7H2][#6H2]                      | 0.8698 | [#7][#6][#6X3]                    | 0.8007 |
| best positives                    | prob   | best negatives                    | prob   |
| [CX3](=[OX1])C                    | 0.9844 | C=CC=CC#C                         | 0.0    |
| [#7X3][#6H2]                      | 0.9755 | CC=CCC#C                          | 0.0    |
| [#8]=[#6][#8]                     | 0.9195 | CC#CC#C                           | 0.0    |
| [#7][#6H2]                        | 0.9154 | C=CCCC#C                          | 0.0    |
| [#7H2][#6H2]                      | 0.8698 | [#6H2]=[#6][#6X2]                 | 0.0    |
| [CX4H2][CX3]=O                    | 0.8644 | CC=CC#CC                          | 0.0    |
| [CX3](=[OX1])O                    | 0.8606 | [CX2H0](#[CX2H0])[CX2H0]          | 0.0    |
| [CX3](=O)[OX2H1]                  | 0.8547 | [CX2H1]#[CX2H0][CX3H1]=[CX3H0]    | 0.0    |
| [CX3H0](=[OX1H0])([OX2H1])[CX4H2] | 0.8147 | CCC#CC=C                          | 0.0    |
| [#7][#6][#6X3]                    | 0.8007 | [CX2H0](#[CX2H0])[CX4H1]          | 0.0    |
| worst negatives                   | prob   | worst positives                   | prob   |
| [#7X3H1]                          | 0.3652 | [#8][#6][#6H2]                    | 0.5088 |
| [CX3H0](=[OX1H0])([NX3H1])[CX4H2] | 0.28   | [CX4H2]( [NX3H2] ) [CX3H0]        | 0.6126 |
| [CX4H2]CC=O                       | 0.262  | [#7X3H2]                          | 0.6902 |
| [#6H2][#7][#6X3]                  | 0.2507 | [OX2H1]                           | 0.7346 |
| O=[#6][#6][#6X3]                  | 0.2388 | [#6X3][#6H2][#7]                  | 0.7404 |
| [CX4H3][NX3H0]                    | 0.2271 | [OX1H0]=[CX3H0]( [#8] ) [CX4H2]   | 0.7839 |
| [#7X3H0]                          | 0.2161 | [#7][#6][#6X3]                    | 0.8007 |
| [CX4H2][CX4H2]                    | 0.2102 | [CX3H0](=[OX1H0])([OX2H1])[CX4H2] | 0.8147 |
| [OX1H0]=[CX3H0][CX4H2][CX3H0]     | 0.2003 | [CX3](=O)[OX2H1]                  | 0.8547 |
| [#8X1]=[#6X3][#6H2][#6H0]         | 0.1971 | [CX3](=[OX1])O                    | 0.8606 |

---

Example 191 true smiles: C=CC(N)=O formula: C3H5NO  
 Index of correct structure: 0 of 46  
 True structure loss: 0.014223  
 True structure:

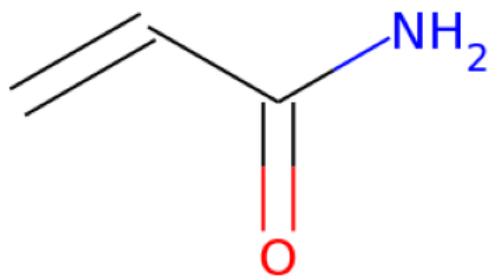

Experimental 13C NMR (solvent: D2O)

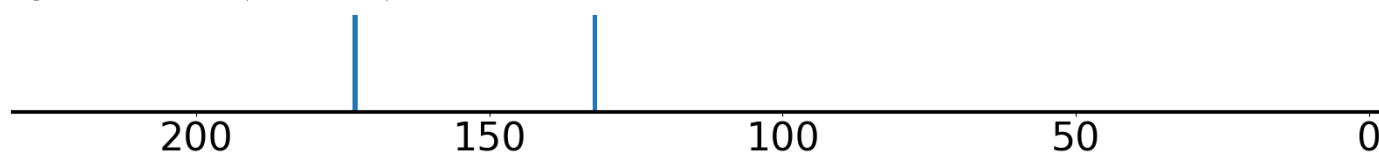

Experimental 1H NMR (solvent: D2O)

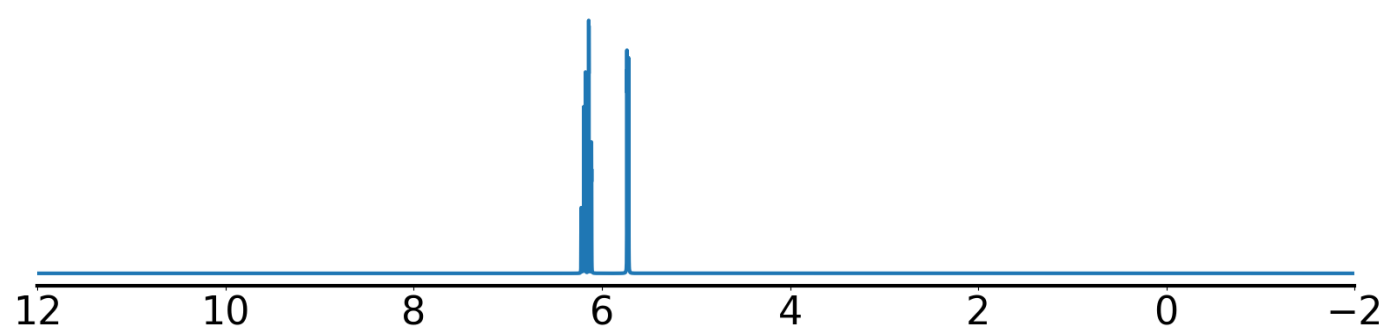

Top predicted structures (loss):

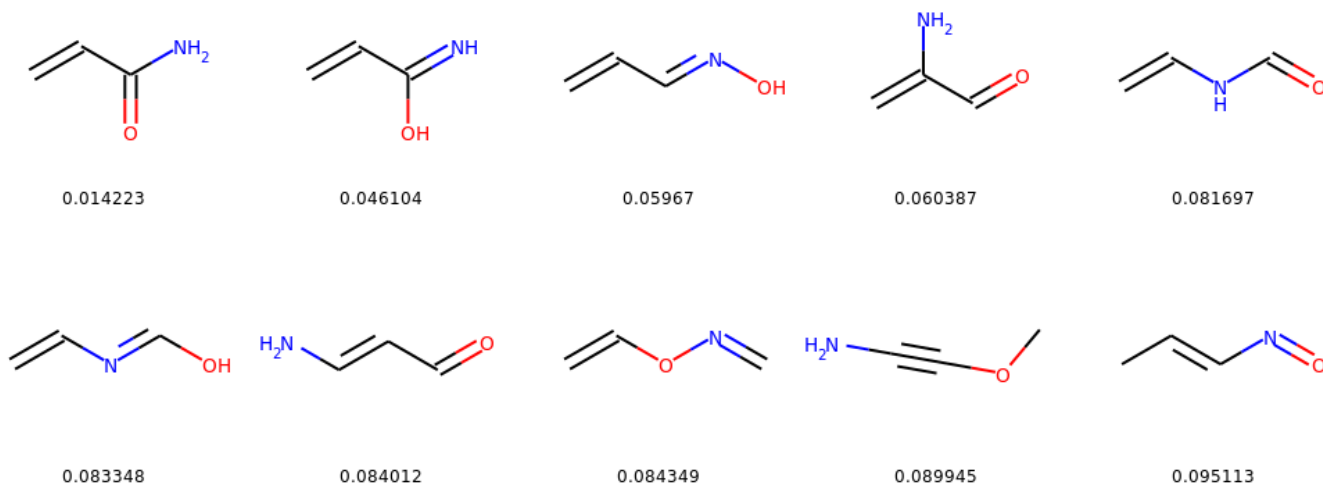

Top predicted substructures  
 [#6X3][#6X3]  
 [CHX3](=C)C  
 [OX1H0]=[CX3H0][CX3H1]=[CX3H2]

prob  
 0.9808  
 0.9559  
 0.9431

[#6X3H2]  
 [#6X3H1][#6X3H0]  
 [CH2X3](=C)

0.9226  
 0.896  
 0.8817



|                                |        |                                              |        |
|--------------------------------|--------|----------------------------------------------|--------|
| [#7X3H2]                       | 0.9299 | O=[#6][#6]=[#6X3]                            | 0.807  |
| [#6H1]                         | 0.9268 | [#7H2][#6H0]                                 | 0.7796 |
| best positives                 | prob   | best negatives                               | prob   |
| [#6X3][#6X3]                   | 0.9808 | CCC#CC#C                                     | 0.0    |
| [CHX3](=C)C                    | 0.9559 | [OX2H0][CX4H1][CX4H1]([CX4H2][CX4H1])[CX4H1] | 0.0    |
| [OX1H0]=[CX3H0][CX3H1]=[CX3H2] | 0.9431 | [CX2H0](#[CX2H0])[CX2H0]                     | 0.0    |
| [#7X3H2]                       | 0.9299 | [OX1H0]=[CX3H0]1[CX4H1][CX4H1][CX4H2]1       | 0.0    |
| [#6H1]                         | 0.9268 | [OX2H0][CX4H2][CX4H1]([CX4H1])[CX4H1]        | 0.0    |
| [#6X3H2]                       | 0.9226 | [CX2H0](#[CX2H1])[CX4H2]                     | 0.0    |
| [#6X3H1][#6X3H0]               | 0.896  | [CX2H0](#[CX2H1])[CX4H0]                     | 0.0    |
| [CH2X3](=C)                    | 0.8817 | [#6H2][#6][#6X2]                             | 0.0    |
| O=[#6][#6]=[#6X3]              | 0.807  | [OX2H0]1[CX4H2][CX4H2][CX4H1][CX4H1]1        | 0.0    |
| [#7H2][#6H0]                   | 0.7796 | [CX4H1]([OX2H0])([CX4H2])[CX2H0]             | 0.0    |
| worst negatives                | prob   | worst positives                              | prob   |
| [OX2H1]                        | 0.5556 | [#7][#6X3H0][#6X3H1]                         | 0.5274 |
| [CHX3]=[CHX3]                  | 0.4558 | [CX3H1](=[CX3H2])[CX3H0]                     | 0.6151 |
| [CX3](=O)[OX2H1]               | 0.4407 | [CX3H2]=[CX3H1]                              | 0.6272 |
| [#8][#6H0][#6H1]               | 0.4225 | [#8]=[#6H0][#6H1]                            | 0.7066 |
| [#8][#6][#6]=[#6X3]            | 0.4083 | [#7][#6H0][#6H1]                             | 0.7112 |
| [CX3](=[OX1])O                 | 0.3966 | [#7][#6][#6]=[#6X3]                          | 0.7204 |
| [#8]=[#6][#8]                  | 0.3516 | [#7][#6][#6X3]                               | 0.7261 |
| [CX3H1](=[CX3H1])[CX3H0]       | 0.3497 | [CX3](=[OX1])C                               | 0.7582 |
| O=[#6][#6][#6X3]               | 0.3404 | O=C[CX3H]                                    | 0.7693 |
| [#7][#6][#6][#6X3]             | 0.3309 | [#7H2][#6H0]                                 | 0.7796 |

---

Example 192 true smiles: c1cncnc1 formula: C4H4N2  
 Index of correct structure: 0 of 46  
 True structure loss: 0.017585  
 True structure:

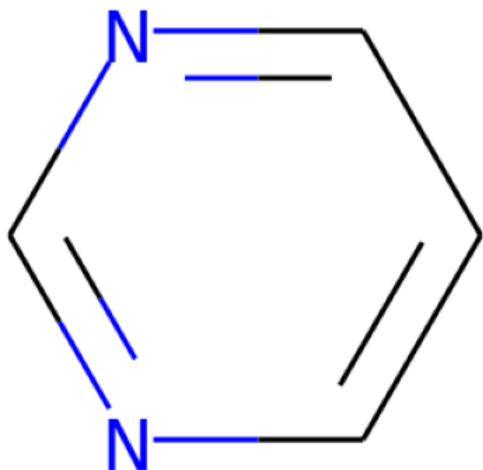

Experimental 13C NMR (solvent: CDCl3)

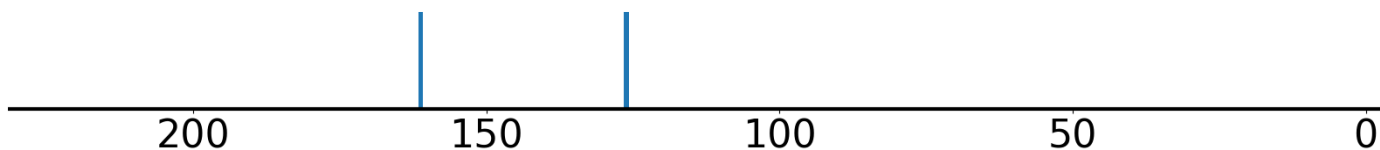

Experimental 1H NMR (solvent: D2O)

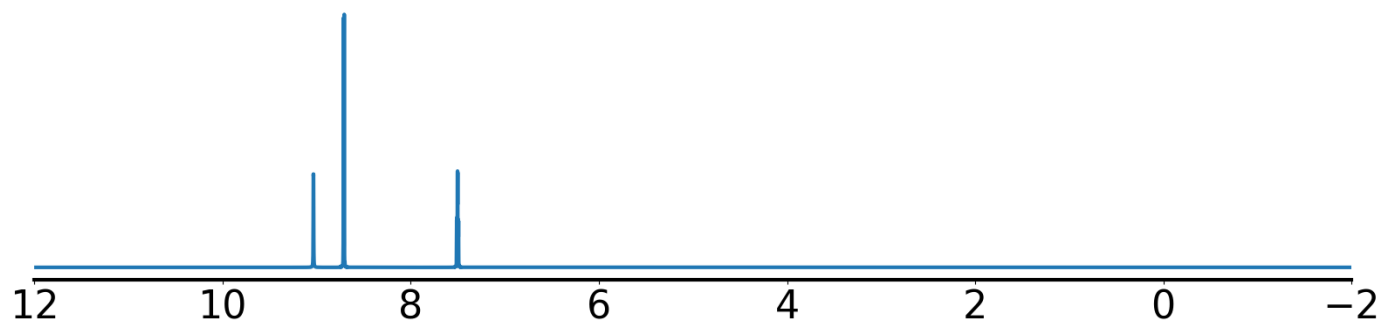

Top predicted structures (loss):

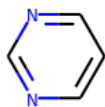

0.017585

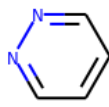

0.018729

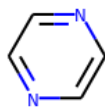

0.023258

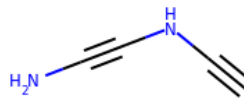

0.059451

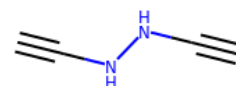

0.061355

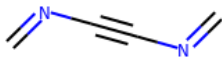

0.061403

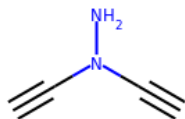

0.061855

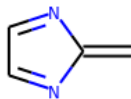

0.067281

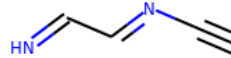

0.072427

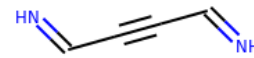

0.073715

Top predicted substructures  
 [#6H1]  
 [#6X3][#6X3]  
 [cH]

prob  
 0.9993  
 0.977  
 0.9504

[#7][#6][#6][#6X3]  
 [#6H1][#6H1]  
 [#6H1][#7][#6H1]

0.8105  
 0.7943  
 0.7546

|                                  |        |                                           |        |
|----------------------------------|--------|-------------------------------------------|--------|
| [cH][cH]                         | 0.9432 | [#6X3][#6X3][#6X3][#6X3]                  | 0.7448 |
| [#7][#6][#6X3]                   | 0.8217 | [#6X3H1][#6X3H0]                          | 0.6703 |
| best positives                   | prob   | best negatives                            | prob   |
| [#6H1]                           | 0.9993 | [OX2H0]1[OX4H2][OX4H2][CX4H1][CX4H1]1     | 0.0    |
| [#6X3][#6X3]                     | 0.977  | [OX2H0][CX4H2][CX4H0][OX2H0]              | 0.0    |
| [cH]                             | 0.9504 | [OX2H0][CX4H2][CX4H2][CX4H1][OX2H0]       | 0.0    |
| [cH][cH]                         | 0.9432 | [OX1H0]=[CX3H0]1[CX4H1][CX4H1][CX4H2]1    | 0.0    |
| [#7][#6][#6X3]                   | 0.8217 | [OX2H1][CX4H1][CX4H1]([CX4H1])[CX4H1]     | 0.0    |
| [#7][#6][#6][#6X3]               | 0.8105 | [#8][#6H1][#6H2][#6H1]=[#8]               | 0.0    |
| [#6H1][#6H1]                     | 0.7943 | [CX4H0]([OX2H1])([CX4H3])([CX4H2])[CX4H1] | 0.0    |
| [#6H1][#7][#6H1]                 | 0.7546 | [CX4H1]([OX2H0])([CX4H2])[CX2H0]          | 0.0    |
| [cX3H1]([nX2H0])[cX3H1]          | 0.6421 | [OX2H0][CX4H2][CX4H1]([CX4H1])[CX4H3]     | 0.0    |
| [cX3H1]([cX3H1])[cX3H1]          | 0.6359 | [OX2H0][CX4H1]([CX4H1])[CX4H1][CX4H3]     | 0.0    |
| worst negatives                  | prob   | worst positives                           | prob   |
| [#6X3][#6X3][#6X3][#6X3]         | 0.7448 | [#7][#6][#6][#6][#7]                      | 0.2938 |
| [#6X3H1][#6X3H0]                 | 0.6703 | [#7][#6H1][#7]                            | 0.339  |
| [cX3H1]([cX3H1])[cX3H0]          | 0.5854 | [#7][#6][#7]                              | 0.4802 |
| [#7][#6X3H0][#6X3H1]             | 0.5144 | [#6X3][#7][#6X3]                          | 0.6103 |
| [cX3H1]([nX2H0])[cX3H0]          | 0.418  | [cX3H1]([cX3H1])[cX3H1]                   | 0.6359 |
| [#7][#6H0][#6H1]                 | 0.3842 | [cX3H1]([nX2H0])[cX3H1]                   | 0.6421 |
| [#7][#7]                         | 0.3635 | [#6H1][#7][#6H1]                          | 0.7546 |
| [#6X3][#7X3][#6X3]               | 0.3396 | [#6H1][#6H1]                              | 0.7943 |
| [#6]1[#6][#6][#6][#6][#7]1       | 0.3349 | [#7][#6][#6][#6X3]                        | 0.8105 |
| [#6X3H1][#6X3H1][#6X3H0][#6X3H1] | 0.3137 | [#7][#6][#6X3]                            | 0.8217 |

---

Example 193 true smiles: Cc1ccoc1 formula: C5H6O  
 Index of correct structure: 0 of 45  
 True structure loss: 0.009801  
 True structure:

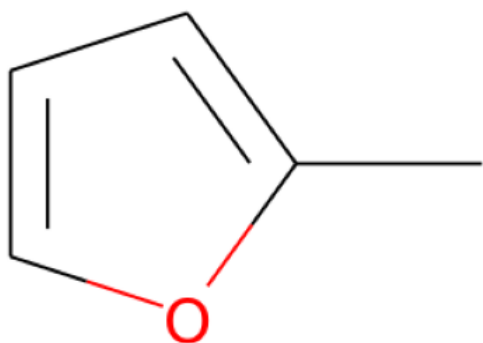

Experimental 13C NMR (solvent: CDCl3)

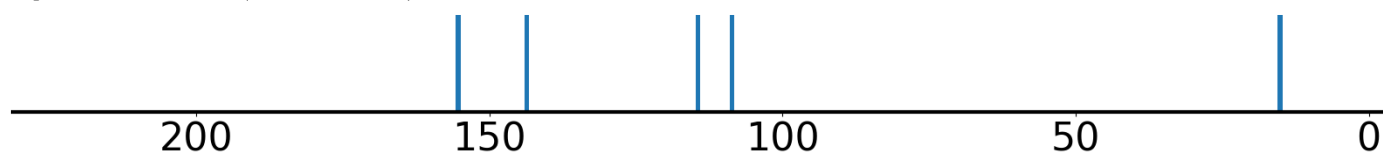

Experimental 1H NMR (solvent: CDCl3)

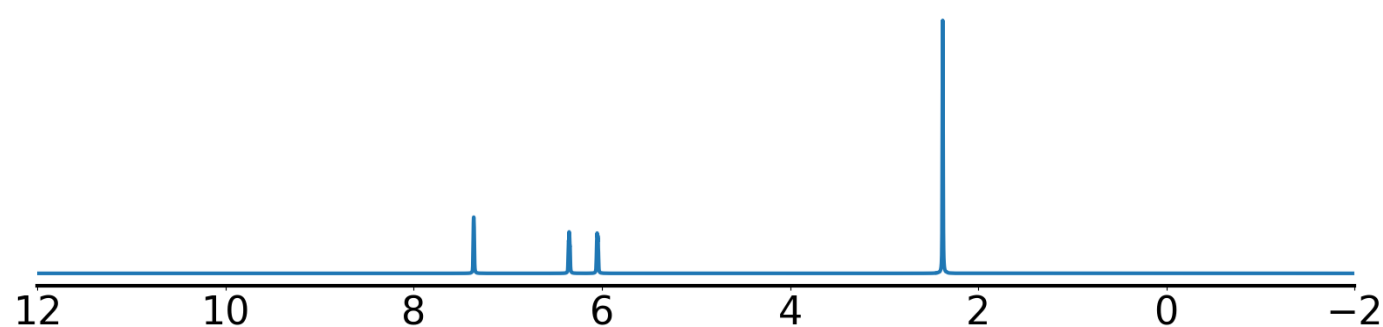

Top predicted structures (loss):

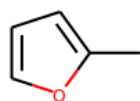

0.009801

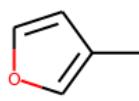

0.036472

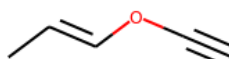

0.141783

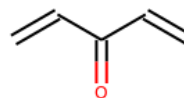

0.158804

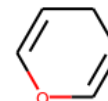

0.162743

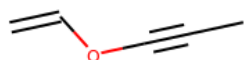

0.166676

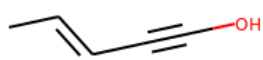

0.167792

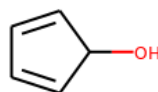

0.176873

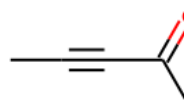

0.178773

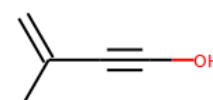

0.183347

Top predicted substructures  
 [#6H1]  
 [cH][cH]  
 [#6X3][#6X3][#6X3][#6X3]

prob  
 0.9995  
 0.999  
 0.9983

[CX4H3][#6]  
 [cH]  
 [cX3H1]([cX3H1])[cX3H0]

0.9925  
 0.991  
 0.986

|                                  |        |                                           |        |
|----------------------------------|--------|-------------------------------------------|--------|
| [#6X3][#6X3]                     | 0.998  | [#6X3H1][#6X3H0]                          | 0.9853 |
| [CX4H3]                          | 0.996  | [#6H3][#6][#6]                            | 0.9634 |
| best positives                   | prob   | best negatives                            | prob   |
| [#6H1]                           | 0.9995 | [OX1H0]=[CX3H0]1[CX4H1][CX4H1][CX4H2]1    | 0.0    |
| [cH][cH]                         | 0.999  | [CX4H1]([NX3H2])([CX4H2])[CX3H1]          | 0.0    |
| [#6X3][#6X3][#6X3][#6X3]         | 0.9983 | CCC#CC#C                                  | 0.0    |
| [#6X3][#6X3]                     | 0.998  | [OX2H0]1[CX4H2][CX4H2][CX4H1][CX4H1]1     | 0.0    |
| [CX4H3]                          | 0.996  | [CX4H0]([NX3H1])([CX4H3])([CX4H2])[CX4H1] | 0.0    |
| [CX4H3][#6]                      | 0.9925 | [CX4H1]([NX3H0])([CX4H2])[CX4H0]          | 0.0    |
| [cH]                             | 0.991  | [CX4H1]([CX4H2])([CX4H1])[CX2H0]          | 0.0    |
| [cX3H1]([cX3H1])[cX3H0]          | 0.986  | [CX4H0]([NX3H1])([CX4H2])([CX4H2])[CX4H1] | 0.0    |
| [#6X3H1][#6X3H0]                 | 0.9853 | [OX2H1][CX4H1]1[CX4H1][CX4H2][CX4H1]1     | 0.0    |
| [#6H3][#6][#6]                   | 0.9634 | [#6X2][#6H1][#6X2]                        | 0.0    |
| worst negatives                  | prob   | worst positives                           | prob   |
| [cX3H1]([cX3H0])[cX3H0]          | 0.3007 | [#8][#6H][#6X3][#6X3H]                    | 0.2426 |
| [CX4H2]([#6][#6])                | 0.2846 | o[cH]                                     | 0.3342 |
| [#6X3H1][#6X3H1][#6X3H0][#6X3H1] | 0.2358 | [#8][#6H1][#6H1]                          | 0.4695 |
| [cH]cO                           | 0.2092 | [CH3][#6][#8]                             | 0.5045 |
| [OX2H1]                          | 0.2016 | [cX3H1]([OX2H0])[cX3H1]                   | 0.6672 |
| [OX2H][cX3]:[c]                  | 0.1938 | [cX3H1]([cX3H1])[cX3H1]                   | 0.7585 |
| [cX3H0][cX3H1][cX3H1][cX3H0]     | 0.1833 | [#8][#6H0][#6H1]                          | 0.7773 |
| [#8][#6][#6H2]                   | 0.1577 | [#6H3][#6H0]                              | 0.844  |
| [CX4H2][CX4H2]                   | 0.1193 | [CX4H3][cX3H0][OX2H0]                     | 0.8865 |
| [#7][#6][#6][#6X3]               | 0.0804 | [#6H1][#6H1]                              | 0.9041 |

---

Example 194 true smiles: CNC(=N)N formula: C2H7N3  
 Index of correct structure: 0 of 39  
 True structure loss: 0.012255  
 True structure:

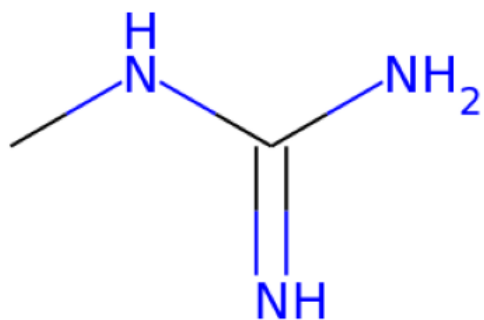

Experimental <sup>13</sup>C NMR (solvent: D2O)

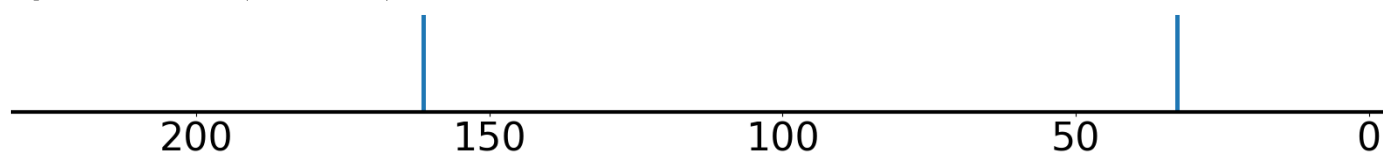

Experimental <sup>1</sup>H NMR (solvent: D2O)

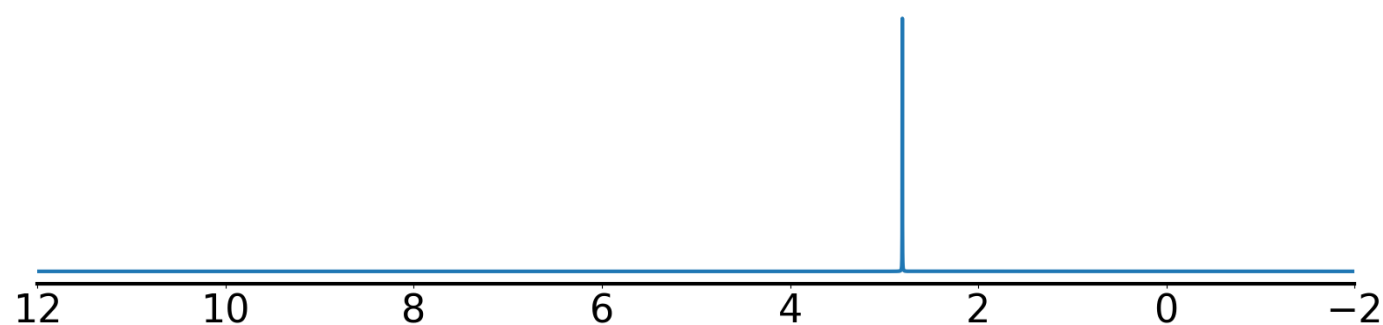

Top predicted structures (loss):

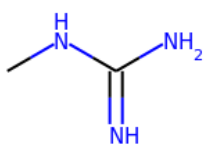

0.012255

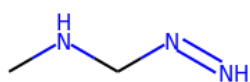

0.034622

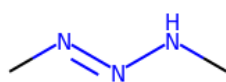

0.03556

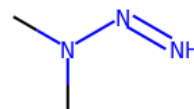

0.035682

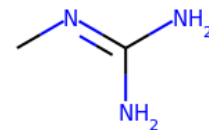

0.040991

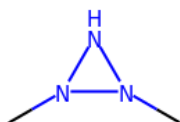

0.041908

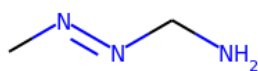

0.046539

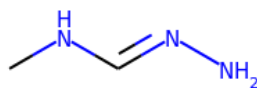

0.050554

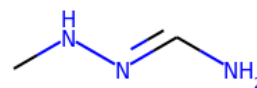

0.055232

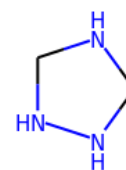

0.058862

Top predicted substructures  
 [#7X3][#6H3]  
 [#6H3][#7]  
 [CX4H3]

prob  
 0.9971  
 0.9757  
 0.9644

[#6H3][#7][#6X3]  
 [#7][#6][#7]  
 [#7X3H1]

0.9427  
 0.8712  
 0.7627

|                          |        |                                              |        |
|--------------------------|--------|----------------------------------------------|--------|
| [#7][#6H0][#7]           | 0.9543 | [#7][#6]([#7])=[#7]                          | 0.7359 |
| [NH1][#6][#7]            | 0.9455 | [CX4H3][NX3H1]                               | 0.7287 |
| best positives           | prob   | best negatives                               | prob   |
| [#7X3][#6H3]             | 0.9971 | [CX2H0](#[CX2H1])[CX2H0]                     | 0.0    |
| [#6H3][#7]               | 0.9757 | CCC#CC#C                                     | 0.0    |
| [CX4H3]                  | 0.9644 | C=CCCC#C                                     | 0.0    |
| [#7][#6H0][#7]           | 0.9543 | [OX2H0][CX4H1][CX4H1]([CX4H2][CX4H1])[CX4H1] | 0.0    |
| [NH1][#6][#7]            | 0.9455 | [OX2H0]1[CX4H2][CX4H1][CX4H1]1               | 0.0    |
| [#6H3][#7][#6X3]         | 0.9427 | C=CC=CC#C                                    | 0.0    |
| [#7][#6][#7]             | 0.8712 | [OX2H1][CX4H1]1[CX4H1][CX4H2][CX4H1]1        | 0.0    |
| [#7X3H1]                 | 0.7627 | CC=CCC#C                                     | 0.0    |
| [#7][#6]([#7])=[#7]      | 0.7359 | [OX2H0][CX4H2][CX4H1]([CX4H1])[CX4H1]        | 0.0    |
| [CX4H3][NX3H1]           | 0.7287 | CCC=CC#C                                     | 0.0    |
| worst negatives          | prob   | worst positives                              | prob   |
| [#7H1][#6H0][#7X3][#6H3] | 0.5542 | [#7H2][#6H0]                                 | 0.2385 |
| [#7][#6H0][#6H1]         | 0.2709 | [#6]=[#7H]                                   | 0.4274 |
| [#7][#6][#6][#7]         | 0.27   | [#7X3H2]                                     | 0.4319 |
| [#7X3H0]                 | 0.2491 | [NH1]=[#6][#7]                               | 0.5231 |
| [#7][#7]                 | 0.1917 | [#7][#6]=[#7]                                | 0.5239 |
| [#6X3][#7X3][#6X3]       | 0.1657 | [#7H1]=[#6H0][#7X3][#6H3]                    | 0.5455 |
| [#6H1]                   | 0.1581 | [NH1][#6]=[#7]                               | 0.5767 |
| [#7][#6][#6X3]           | 0.1494 | [#7][#6H0]=[#7]                              | 0.6009 |
| [#7][#6X3H0][#6X3H1]     | 0.1283 | [CX4H3][NX3H1]                               | 0.7287 |
| [cH]                     | 0.1279 | [#7][#6]([#7])=[#7]                          | 0.7359 |

---

Example 195 true smiles: CC(O)C(=O)O formula: C3H6O3  
 Index of correct structure: 0 of 38  
 True structure loss: 0.008204  
 True structure:

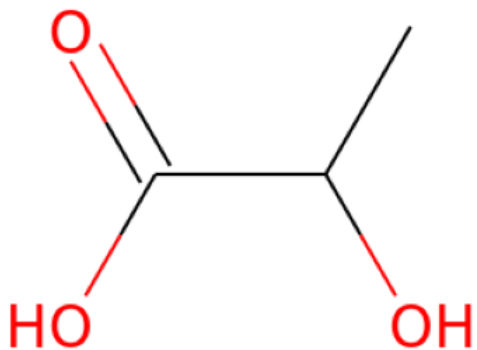

Experimental <sup>13</sup>C NMR (solvent: D2O)

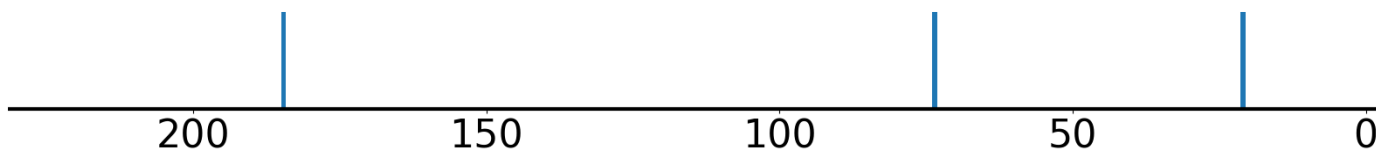

Experimental <sup>1</sup>H NMR (solvent: D2O)

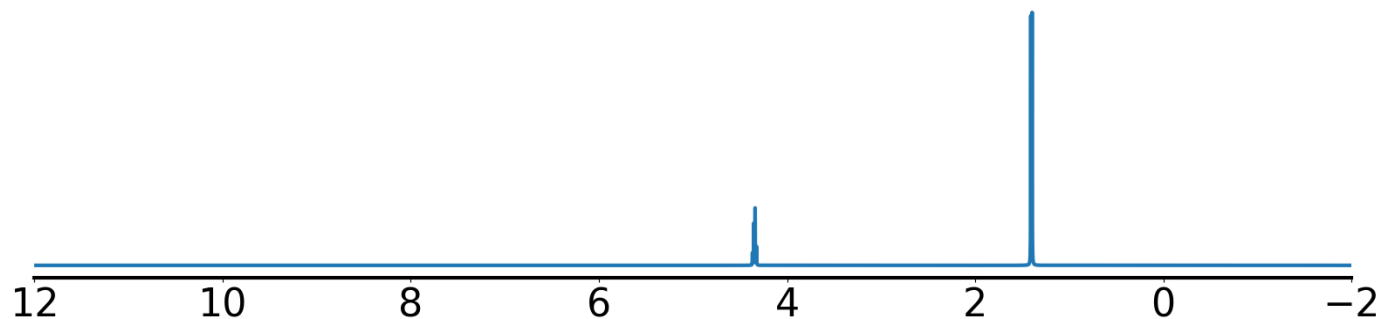

Top predicted structures (loss):

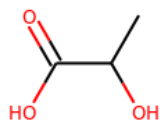

0.008204

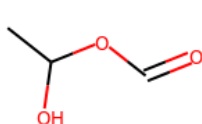

0.056712

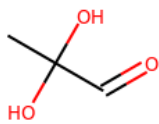

0.062729

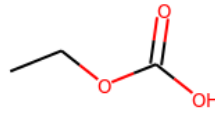

0.065243

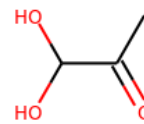

0.077549

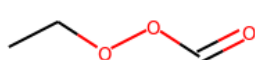

0.079312

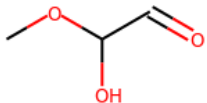

0.100439

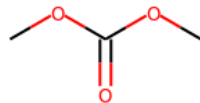

0.102971

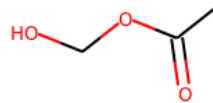

0.10319

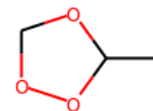

0.111373

Top predicted substructures  
 [CX4H3]  
 [#6H3][#6][#6]  
 [CX4H3][#6]

prob  
 0.9999  
 0.9973  
 0.9967

[CX4H]O  
 [OX2H1]  
 [CH3][#6][#8]

0.9812  
 0.9767  
 0.9437



|                                  |        |                                   |        |
|----------------------------------|--------|-----------------------------------|--------|
| [CX4H3][CX4]O                    | 0.9966 | [#8][#6][#6]=[#8]                 | 0.941  |
| [CX3](=[OX1])C                   | 0.9966 | [CX3](=[OX1])O                    | 0.9326 |
| best positives                   | prob   | best negatives                    | prob   |
| [CX4H3]                          | 0.9999 | CC=CC#CC                          | 0.0    |
| [#6H3][#6][#6]                   | 0.9973 | C=CCCC#C                          | 0.0    |
| [CX4H3][#6]                      | 0.9967 | [CX3H0](=[CX3H2])([CX4H2])[CX4H2] | 0.0    |
| [CX4H3][CX4]O                    | 0.9966 | [#6X2][#6H1][#6X2]                | 0.0    |
| [CX3](=[OX1])C                   | 0.9966 | [CX3H1](=[CX3H1])[CX2H0]          | 0.0    |
| [CX4H]O                          | 0.9812 | CC=CCC#C                          | 0.0    |
| [OX2H1]                          | 0.9767 | CCC#CC#C                          | 0.0    |
| [CH3][#6][#8]                    | 0.9437 | C=CC=CC#C                         | 0.0    |
| [#8][#6][#6]=[#8]                | 0.941  | [CX4H2]([CX4H0])[CX2H0]           | 0.0    |
| [CX3](=[OX1])O                   | 0.9326 | CCC#CC=C                          | 0.0    |
| worst negatives                  | prob   | worst positives                   | prob   |
| [#6H1][#6H1]                     | 0.4131 | [CH3]CC[OH]                       | 0.5758 |
| [#8][#6H1][#6H1]                 | 0.3548 | [CX3](=O)[OX2H1]                  | 0.5904 |
| [CX4H1]([OX2H1])([CX4H3])[CX4H1] | 0.2444 | [CX3H0](=[OX1H0])([OX2H1])[CX4H1] | 0.6291 |
| [#8]=[#6][#6H1][#6H1]            | 0.2316 | [CX4H](O)CO                       | 0.6409 |
| [#6X3][#6][#6][#6H3]             | 0.18   | [#8][#6H0][#6H1]                  | 0.6977 |
| [OX2H0][CX4H1][CX4H3]            | 0.1754 | [#8H][#6X4H1][#6X3H0]             | 0.7316 |
| [#8][#6][#6][#6X3]               | 0.1618 | [#8][#6][#6][#8]                  | 0.7592 |
| [#6H1][#6H2]                     | 0.075  | [#6H3][#6][#6X3]                  | 0.8117 |
| [#8][#6H1][#6H1][#6H3]           | 0.0727 | [OH][CX4H]                        | 0.8204 |
| [#6H3][#6][#6][#6H3]             | 0.0702 | [CX4H1]([OX2H1])([CX4H3])[CX3H0]  | 0.8339 |

---

Example 196 true smiles: O=C(O)CCO formula: C3H6O3  
 Index of correct structure: 0 of 38  
 True structure loss: 0.007232  
 True structure:

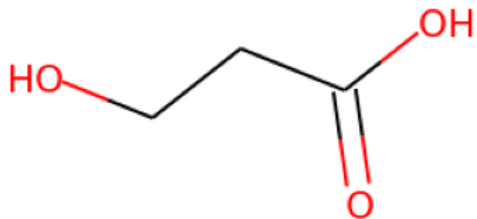

Experimental <sup>13</sup>C NMR (solvent: D2O)

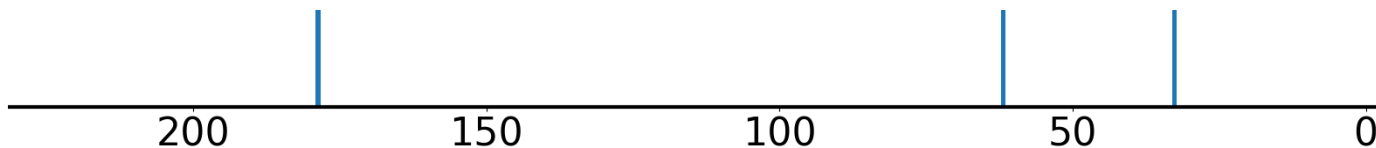

Experimental <sup>1</sup>H NMR (solvent: D2O)

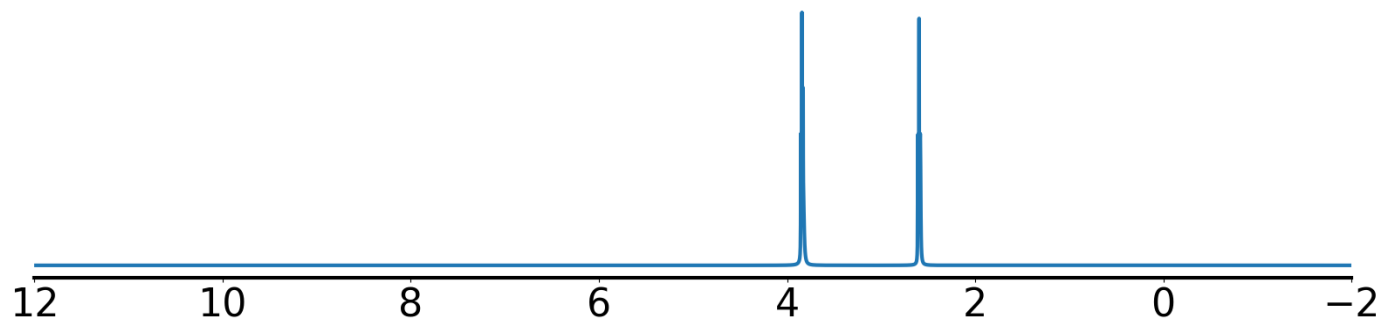

Top predicted structures (loss):

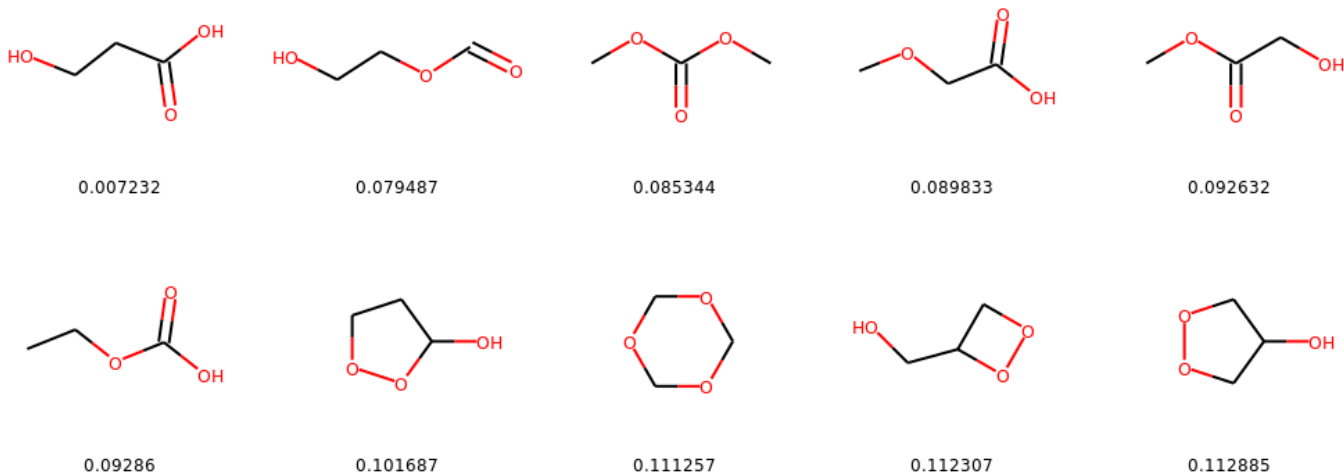

Top predicted substructures  
 [CX4H2]([#6])[#6]  
 [#8]=[#6][#8]  
 [CX3](=[OX1])C

prob  
 0.9983  
 0.9953  
 0.9952

[CX4H2]([CX4H2])[CX3H0]  
 [#8][#6][#6H2]  
 [CX4H2]([#6])[O]

0.9746  
 0.9727  
 0.9628

|                                   |        |                                   |        |
|-----------------------------------|--------|-----------------------------------|--------|
| [OX2H1]                           | 0.9898 | OCC[CH2]                          | 0.9456 |
| [CX3](=[OX1])O                    | 0.9837 | [CX4H2][CX4H2]                    | 0.9252 |
| best positives                    | prob   | best negatives                    | prob   |
| [CX4H2]([#6])[#6]                 | 0.9983 | [CX2H1]#[CX2H0][CX3H1]=[CX3H0]    | 0.0    |
| [#8]=[#6][#8]                     | 0.9953 | CC=CCC#C                          | 0.0    |
| [CX3](=[OX1])C                    | 0.9952 | [#6X2][#6H1][#6X2]                | 0.0    |
| [OX2H1]                           | 0.9898 | CC=CC#CC                          | 0.0    |
| [CX3](=[OX1])O                    | 0.9837 | C=CC=CC#C                         | 0.0    |
| [CX4H2]([CX4H2])[CX3H0]           | 0.9746 | [#6X3][#6]#[#6][#6H3]             | 0.0    |
| [#8][#6][#6H2]                    | 0.9727 | CCC#CC#C                          | 0.0    |
| [CX4H2]([#6])[O]                  | 0.9628 | [CX3H1](=[CX3H2])[CX2H0]          | 0.0    |
| OCC[CH2]                          | 0.9456 | [CX3H1](=[CX3H1])[CX2H0]          | 0.0    |
| [CX4H2][CX4H2]                    | 0.9252 | [CX3H0](=[CX3H1])([OX2H0])[CX2H0] | 0.0    |
| worst negatives                   | prob   | worst positives                   | prob   |
| [#8][#6][#6][#6][#6]=[#8]         | 0.3974 | [#8][#6][#6][#6X3]                | 0.5021 |
| [CX3H0](=[OX1H0])([OX2H1])[CX4H1] | 0.3022 | O=C[CH2][CH2]O                    | 0.555  |
| [OX2H0][CX3H0][CX4H2]             | 0.2971 | [CX3H0](=[OX1H0])([OX2H1])[CX4H2] | 0.6778 |
| [#8][#6][#6][#6][#6][#8]          | 0.271  | [CX4H2][CX3]=O                    | 0.7871 |
| [CX4H2]([CX4H2])[CX4H2]           | 0.1846 | [CX4H2]([OX2H1])[CX4H2]           | 0.8216 |
| [CX3H0](=[OX1H0])([OX2H0])[CX4H2] | 0.1766 | [CX4H2]CC=O                       | 0.8781 |
| [#6H1][#6H2]                      | 0.1619 | O=[CX3H0][CX4H2][CX4H2]           | 0.9095 |
| [#8]=[#6H0][#6H1]                 | 0.1546 | [CH2X4](O)[CX4H2]                 | 0.9098 |
| [CX4H2]([OX2H0])[CX4H2]           | 0.1542 | [OX1H0]=[CX3H0]([#8])[CX4H2]      | 0.9172 |
| [#7X3H2]                          | 0.1086 | [CX3](=O)[OX2H1]                  | 0.9235 |

---

Example 197 true smiles: CC(O)C(=O)O formula: C3H6O3  
 Index of correct structure: 0 of 38  
 True structure loss: 0.010427  
 True structure:



Experimental <sup>13</sup>C NMR (solvent: DMSO)

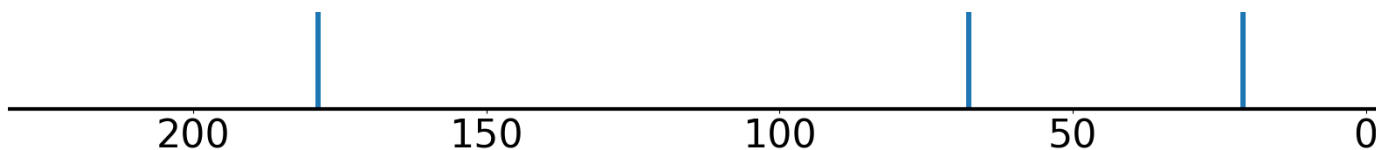

Experimental <sup>1</sup>H NMR (solvent: D2O)

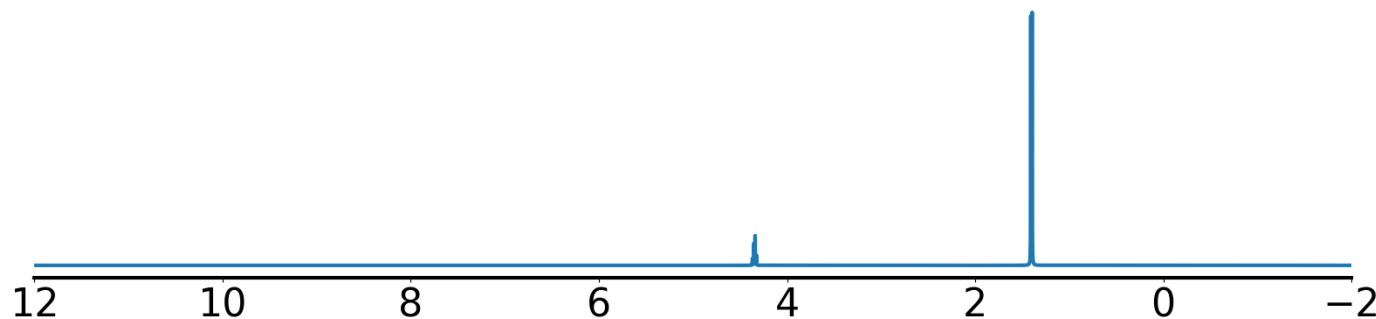

Top predicted structures (loss):

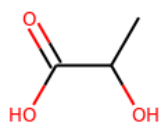

0.010427

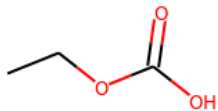

0.048633

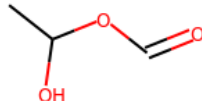

0.053373

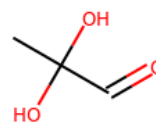

0.059115

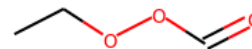

0.063273

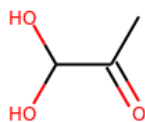

0.071394

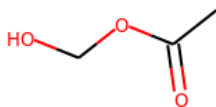

0.077329

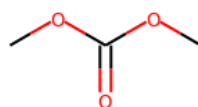

0.085279

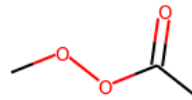

0.087326

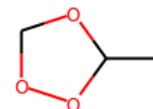

0.108892

Top predicted substructures  
 [CX4H3]  
 [#6H3][#6][#6]  
 [CX3](=[OX1])C

prob  
 0.9999  
 0.9968  
 0.9964

[CX3](=[OX1])O  
 [#8]=[#6][#8]  
 [OX2H1]

0.9902  
 0.9837  
 0.9517

|                                   |        |                                   |        |
|-----------------------------------|--------|-----------------------------------|--------|
| [CX4H3][CX4]O                     | 0.9954 | [CH3][#6][#8]                     | 0.9265 |
| [CX4H3][#6]                       | 0.993  | [CX4H3][CX4H1][OX2H1]             | 0.9068 |
| best positives                    | prob   | best negatives                    | prob   |
| [CX4H3]                           | 0.9999 | CC=CC#CC                          | 0.0    |
| [#6H3][#6][#6]                    | 0.9968 | C=CCCC#C                          | 0.0    |
| [CX3](=[OX1])C                    | 0.9964 | [CX3H1](=[CX3H2])[CX2H0]          | 0.0    |
| [CX4H3][CX4]O                     | 0.9954 | CCC#CC=C                          | 0.0    |
| [CX4H3][#6]                       | 0.993  | [#6X2][#6H1][#6X2]                | 0.0    |
| [CX3](=[OX1])O                    | 0.9902 | [CX3H0](=[CX3H2])([CX4H2])[CX4H2] | 0.0    |
| [#8]=[#6][#8]                     | 0.9837 | [CX3H1](=[CX3H1])[CX2H0]          | 0.0    |
| [OX2H1]                           | 0.9517 | C=CC=CC#C                         | 0.0    |
| [CH3][#6][#8]                     | 0.9265 | [CX3H0](=[CX3H1])([OX2H0])[CX2H0] | 0.0    |
| [CX4H3][CX4H1][OX2H1]             | 0.9068 | [CX2H1]#[CX2H0][CX3H1]=[CX3H0]    | 0.0    |
| worst negatives                   | prob   | worst positives                   | prob   |
| [CX4H2]([OX2H0])[CX4H3]           | 0.2077 | [CH3]CC[OH]                       | 0.3688 |
| [#6H1][#6H1]                      | 0.1839 | [#8H][#6X4H1][#6X3H0]             | 0.3703 |
| [CX4H1]([OX2H1])([CX4H3])[CX4H1]  | 0.1673 | [CX4H](O)CO                       | 0.3781 |
| [#8][#6H1][#6H1]                  | 0.1497 | [#8][#6][#6][#8]                  | 0.506  |
| [#6X3][#6][#6][#6H3]              | 0.1369 | [OH][CX4H]                        | 0.6438 |
| [OX1H0]=[CX3H0][CX4H0][CX4H3]     | 0.1142 | [#8][#6H0][#6H1]                  | 0.6957 |
| [CX3H0](=[OX1H0])([OX2H0])[CX4H1] | 0.1111 | [CX3H0](=[OX1H0])([OX2H1])[CX4H1] | 0.7147 |
| [CX4H2]CC=O                       | 0.111  | [CX4H1]([OX2H1])([CX4H3])[CX3H0]  | 0.7241 |
| [#8][#6][#6][#6X3]                | 0.111  | [#8][#6][#6]=[#8]                 | 0.7607 |
| [CX4H2][CX3]=O                    | 0.1024 | [#6H3][#6][#6X3]                  | 0.7709 |

---

Example 198 true smiles: O=C(CO)CO formula: C3H6O3  
 Index of correct structure: 0 of 38  
 True structure loss: 0.013689  
 True structure:

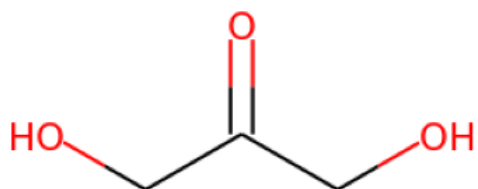

Experimental <sup>13</sup>C NMR (solvent: N/A)

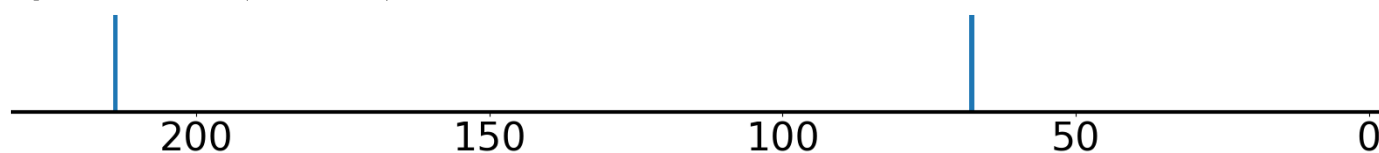

Experimental <sup>1</sup>H NMR (solvent: D2O)

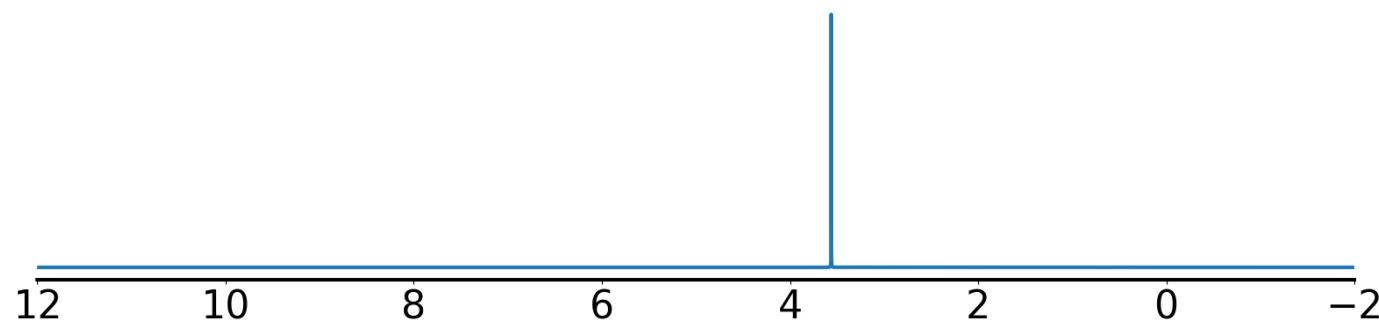

Top predicted structures (loss):

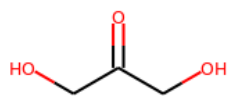

0.013689

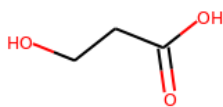

0.060303

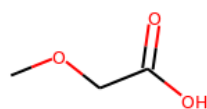

0.063898

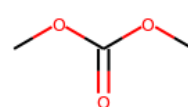

0.065795

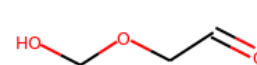

0.070775

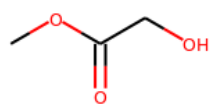

0.072064

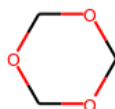

0.072961

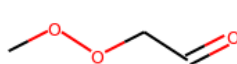

0.073991

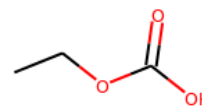

0.081297

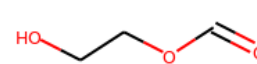

0.091921

Top predicted substructures  
 [CX3](=[OX1])C  
 [OX1H0]=[CX3H0]([#6])[CX4H2]  
 [OX2H1]

prob  
 0.9996  
 0.9969  
 0.9841

[#8][#6][#6]=[#8]  
 [#6H2][#6X3H0][#6H2]  
 OCC[CH2]

0.7643  
 0.7369  
 0.6381

|                                   |        |                                   |        |
|-----------------------------------|--------|-----------------------------------|--------|
| [CX4H2][CX3]=0                    | 0.8879 | [CX4H2]( [#6 ] [O ]               | 0.5832 |
| [CX3H0](=[OX1H0])([CX4H2])[CX4H2] | 0.8812 | [CX4H2]( [OX2H1 ] ) [CX3H0 ]      | 0.567  |
| best positives                    | prob   | best negatives                    | prob   |
| [CX3](=[OX1])C                    | 0.9996 | CC=CC#CC                          | 0.0    |
| [OX1H0]=[CX3H0]( [#6 ] ) [CX4H2 ] | 0.9969 | C=CC=CC#C                         | 0.0    |
| [OX2H1 ]                          | 0.9841 | CC=CCC#C                          | 0.0    |
| [CX4H2][CX3]=0                    | 0.8879 | C=CCCC#C                          | 0.0    |
| [CX3H0](=[OX1H0])([CX4H2])[CX4H2] | 0.8812 | [#6X2][#6H1][#6X2]                | 0.0    |
| [#8][#6][#6]=[#8]                 | 0.7643 | [CX3H1](=[CX3H2])[CX2H0]          | 0.0    |
| [#6H2][#6X3H0][#6H2]              | 0.7369 | [CX3H0](=[CX3H1])([CX4H1])[CX2H0] | 0.0    |
| OCC[CH2]                          | 0.6381 | CC#CCC=C                          | 0.0    |
| [CX4H2]( [#6 ] ) [O ]             | 0.5832 | [CX3H1](=[CX3H1])[CX2H0]          | 0.0    |
| [CX4H2]( [OX2H1 ] ) [CX3H0 ]      | 0.567  | CCC#CC=C                          | 0.0    |
| worst negatives                   | prob   | worst positives                   | prob   |
| [#8][#6][#6H2]                    | 0.5254 | [#6X3][#6H2][#8]                  | 0.2118 |
| [#8][#6][#6][#6X3]                | 0.4512 | [OX2H1][CX4H2][CX3H0][CX4H2]      | 0.43   |
| [CX4H2]CC=O                       | 0.4289 | [OX2H1][CX4H2][#6X3H0]            | 0.4332 |
| O=[#6][#6][#6X3]                  | 0.2862 | [#8]=[#6][#6H2][#8]               | 0.4421 |
| [#8][#6][#6][#8]                  | 0.2629 | [#8][#6H2][#6H0][#6H2][#8]        | 0.5346 |
| [#8][#6][#6H2][#8]                | 0.1799 | [CX4H2]( [OX2H1 ] ) [CX3H0 ]      | 0.567  |
| [#6X3][#6H2][#6X3]                | 0.1772 | [CX4H2]( [#6 ] ) [O ]             | 0.5832 |
| [#8]=[#6H0][#6H1]                 | 0.1447 | OCC[CH2]                          | 0.6381 |
| [CX4H2]( [OX2H1 ] ) [CX4H1 ]      | 0.1426 | [#6H2][#6X3H0][#6H2]              | 0.7369 |
| [CX4H3][OX2H0]                    | 0.1343 | [#8][#6][#6]=[#8]                 | 0.7643 |

---

Example 199 true smiles: CC#CC(=O)O formula: C4H4O2  
 Index of correct structure: 0 of 32  
 True structure loss: 0.004418  
 True structure:

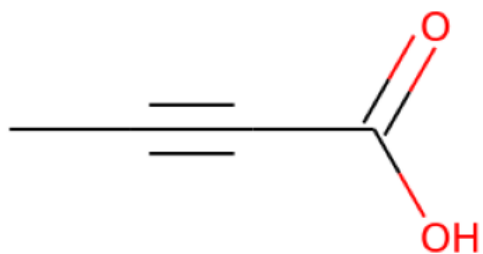

Experimental 13C NMR (solvent: CDCl3)

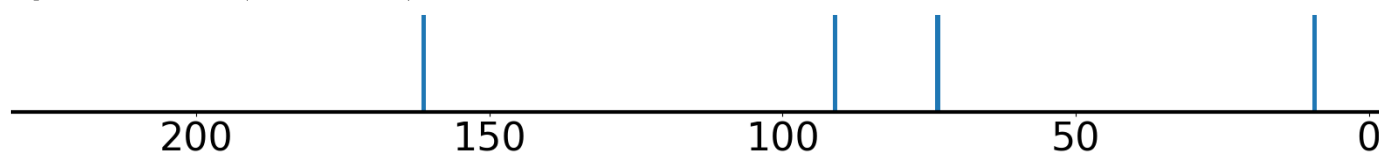

Experimental 1H NMR (solvent: D2O)

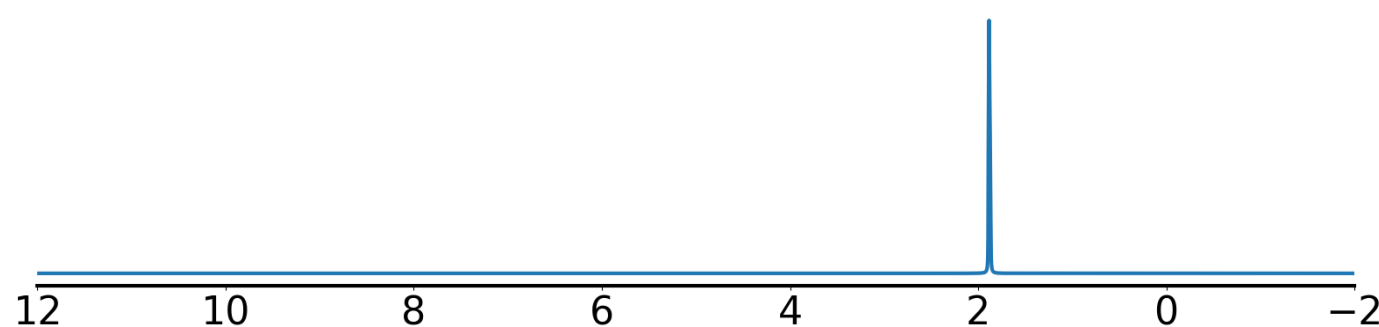

Top predicted structures (loss):

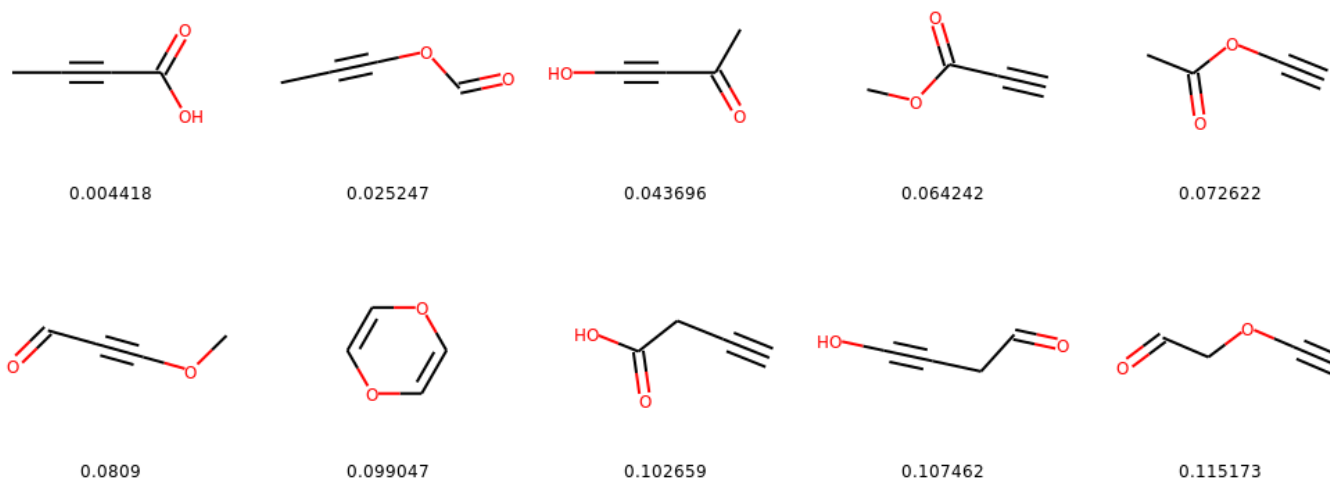

Top predicted substructures  
 [CX4H3][CX2H0]  
 [\$( [CX2]#C )]  
 [CX2H0](#[CX2H0])[CX3H0]

prob  
 0.9993  
 0.9983  
 0.9928

[#8]=[#6][#8]  
 [CX3](=[OX1])O  
 [CX4H3]

0.9138  
 0.9026  
 0.8999



|                                   |        |                                        |        |
|-----------------------------------|--------|----------------------------------------|--------|
| [#6X3][#6][#6][#6H3]              | 0.9864 | [#6H3][#6H0]                           | 0.7969 |
| [CX4H3][#6]                       | 0.9561 | [CX3](=[OX1])C                         | 0.7356 |
| best positives                    | prob   | best negatives                         | prob   |
| [CX4H3][CX2H0]                    | 0.9993 | [OX1H0]=[CX3H0]1[CX4H1][CX4H1][CX4H2]1 | 0.0    |
| [\$([CX2]#C)]                     | 0.9983 | [CX3H1](=[CX3H2])[CX4H2]               | 0.0    |
| [CX2H0](#[CX2H0])[CX3H0]          | 0.9928 | [CX3H0](=[CX3H2])([CX4H2])[CX4H0]      | 0.0    |
| [#6X3][#6][#6][#6H3]              | 0.9864 | [CX3H1](=[CX3H2])[NX3H0]               | 0.0    |
| [CX4H3][#6]                       | 0.9561 | [CX3H2]=[CX3H1][CX4H0][OX2H1]          | 0.0    |
| [#8]=[#6][#8]                     | 0.9138 | [CX3H1](=[CX3H2])[CX4H0]               | 0.0    |
| [CX3](=[OX1])O                    | 0.9026 | [CX4H1]([NX3H2])([CX4H2])[CX3H1]       | 0.0    |
| [CX4H3]                           | 0.8999 | [CX3H1](=[CX3H2])[CX3H0]               | 0.0    |
| [#6H3][#6H0]                      | 0.7969 | [CX3H0](=[CX3H2])([CX4H2])[CX4H2]      | 0.0    |
| [CX3](=[OX1])C                    | 0.7356 | [CX3H0](=[CX3H2])([CX4H3])[CX4H2]      | 0.0    |
| worst negatives                   | prob   | worst positives                        | prob   |
| [#8][#6][#6][#8]                  | 0.2293 | [OX2H1]                                | 0.5969 |
| [#6H1]                            | 0.1463 | [CX3](=O)[OX2H1]                       | 0.7048 |
| [CX3H0](=[OX1H0])([OX2H1])[CX3H0] | 0.1024 | [CX3](=[OX1])C                         | 0.7356 |
| [#8][#6][#6H2]                    | 0.0799 | [#6H3][#6H0]                           | 0.7969 |
| [#8][#6][#6]=[#8]                 | 0.0743 | [CX4H3]                                | 0.8999 |
| [CX4H2][CX3]=O                    | 0.07   | [CX3](=[OX1])O                         | 0.9026 |
| [CX3H](O)                         | 0.0694 | [#8]=[#6][#8]                          | 0.9138 |
| [#6H1][#6H2]                      | 0.0676 | [CX4H3][#6]                            | 0.9561 |
| [CX3H0](=[OX1H0])([OX2H1])[CX4H2] | 0.0632 | [#6X3][#6][#6][#6H3]                   | 0.9864 |
| [#8][#6][#6][#6X3]                | 0.0562 | [CX2H0](#[CX2H0])[CX3H0]               | 0.9928 |

---

Example 200 true smiles: c1ccncc1 formula: C5H5N  
 Index of correct structure: 0 of 27  
 True structure loss: 0.016342  
 True structure:

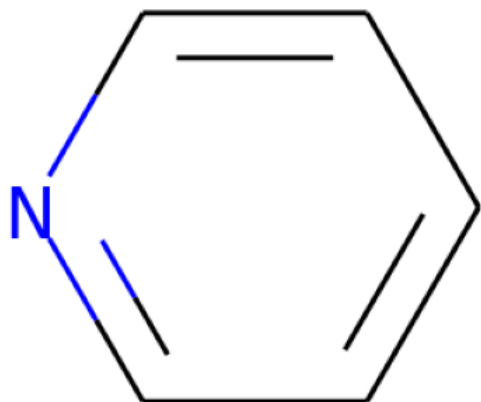

Experimental 13C NMR (solvent: CDCl3)

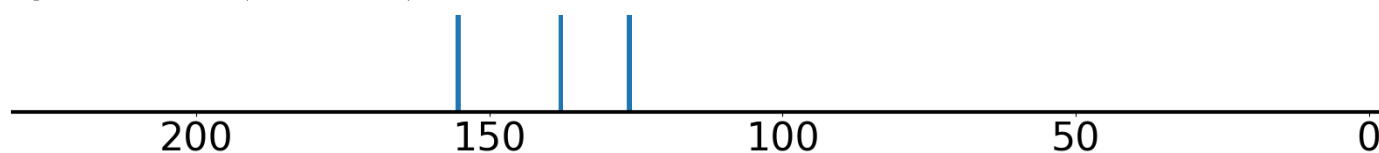

Experimental 1H NMR (solvent: CDCl3)

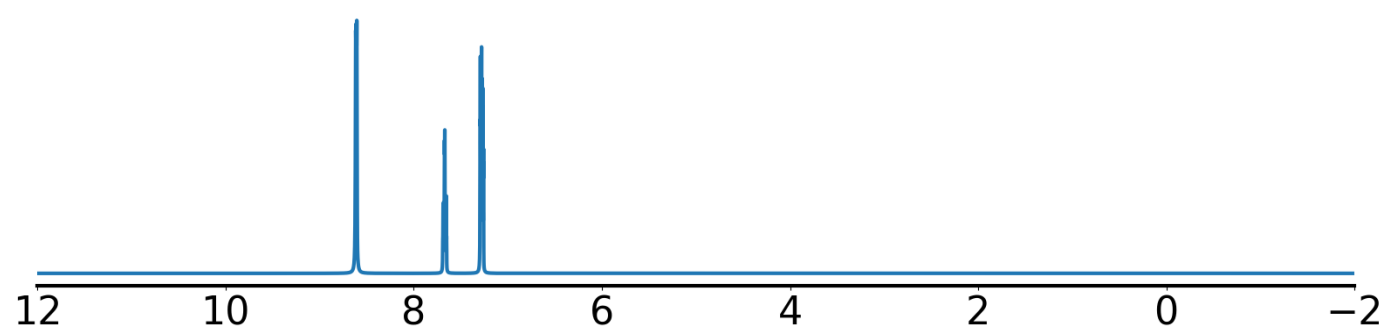

Top predicted structures (loss):

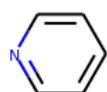

0.016342

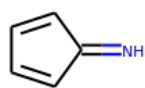

0.132606

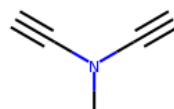

0.145075

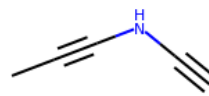

0.161712

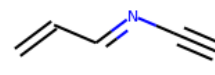

0.168013

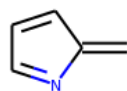

0.172207

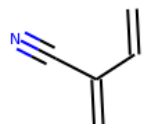

0.181046

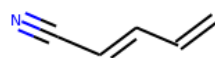

0.18835

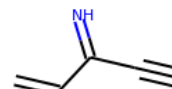

0.191809

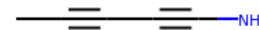

0.196347

Top predicted substructures  
 [#6H1]  
 [cH][cH]  
 [#6X3][#6X3]

prob  
 0.9998  
 0.999  
 0.9984

[cX3H1]([cX3H1])[cX3H1]  
 [#7][#6][#6][#6X3]  
 [cH]

0.9891  
 0.9837  
 0.9816

|                                  |        |                                           |        |
|----------------------------------|--------|-------------------------------------------|--------|
| [#6X3][#6X3][#6X3][#6X3]         | 0.9969 | [#6]1[#6][#6][#6][#6][#7]1                | 0.9665 |
| [#7][#6][#6X3]                   | 0.9914 | [cX3H1]([cX3H1])[cX3H0]                   | 0.9503 |
| best positives                   | prob   | best negatives                            | prob   |
| [#6H1]                           | 0.9998 | [OX2H0]1[CX4H2][CX4H2][CX4H1][CX4H1]1     | 0.0    |
| [cH][cH]                         | 0.999  | [OX2H0][CX4H2][CX4H2][CX4H1][OX2H0]       | 0.0    |
| [#6X3][#6X3]                     | 0.9984 | [OX1H0]=[CX3H0]1[CX4H1][CX4H1][CX4H2]1    | 0.0    |
| [#6X3][#6X3][#6X3][#6X3]         | 0.9969 | [CX4H0]([OX2H1])([CX4H3])([CX4H2])[CX4H1] | 0.0    |
| [#7][#6][#6X3]                   | 0.9914 | [OX2H0][CX4H2][CX4H1]([CX4H1])[CX4H3]     | 0.0    |
| [cX3H1]([cX3H1])[cX3H1]          | 0.9891 | [CX3H0](=[OX1H0])([CX4H1])[CX4H0]         | 0.0    |
| [#7][#6][#6][#6X3]               | 0.9837 | [CX4H1]([CX4H3])([CX4H2])[CX4H0]          | 0.0    |
| [cH]                             | 0.9816 | [OX2H0][CX4H2][CX4H1]([CX4H1])[CX4H1]     | 0.0    |
| [#6]1[#6][#6][#6][#6][#7]1       | 0.9665 | [CX4H0]([OX2H0])([CX4H3])([CX4H2])[CX4H2] | 0.0    |
| [#6H1][#6H1]                     | 0.9494 | [OX2H1][CX4H0][CX4H1]([CX4H2])[CX4H1]     | 0.0    |
| worst negatives                  | prob   | worst positives                           | prob   |
| [cX3H1]([cX3H1])[cX3H0]          | 0.9503 | [#6H1][#7][#6H1]                          | 0.5928 |
| [#6X3H1][#6X3H0]                 | 0.9077 | [#6X3][#7][#6X3]                          | 0.7718 |
| [#6X3H1][#6X3H1][#6X3H0][#6X3H1] | 0.8683 | [cX3H1]([nX2H0])[cX3H1]                   | 0.9044 |
| [#6]1[#6][#6][#6][#6][#6]1       | 0.7428 | [#6H1][#6H1]                              | 0.9494 |
| [#7][#6X3H0][#6X3H1]             | 0.6768 | [#6]1[#6][#6][#6][#6][#7]1                | 0.9665 |
| [#7][#6H0][#6H1]                 | 0.6699 | [cH]                                      | 0.9816 |
| [#7X3H2]                         | 0.4489 | [#7][#6][#6][#6X3]                        | 0.9837 |
| [#7H2][#6H0]                     | 0.2631 | [cX3H1]([cX3H1])[cX3H1]                   | 0.9891 |
| [cX3H1]([nX2H0])[cX3H0]          | 0.2243 | [#7][#6][#6X3]                            | 0.9914 |
| [cH]cO                           | 0.1757 | [#6X3][#6X3][#6X3][#6X3]                  | 0.9969 |

---

Example 201 true smiles: c1ccncc1 formula: C5H5N  
 Index of correct structure: 0 of 27  
 True structure loss: 0.015397  
 True structure:



Experimental 13C NMR (solvent: CDCl3)



Experimental 1H NMR (solvent: CDCl3)

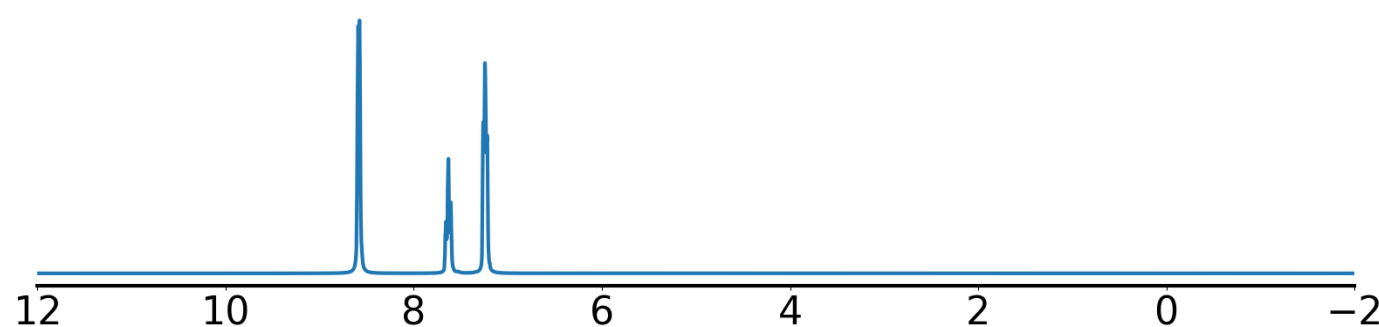

Top predicted structures (loss):

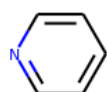

0.015397

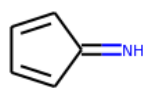

0.139172

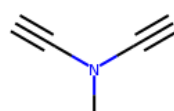

0.14969

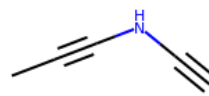

0.164619

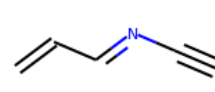

0.176428

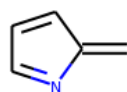

0.183814

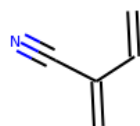

0.19823

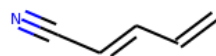

0.199064

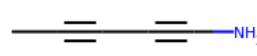

0.200105

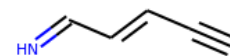

0.205311

Top predicted substructures  
 [#6H1]  
 [cH][cH]  
 [#6X3][#6X3]

prob  
 0.9999  
 0.9996  
 0.9984

[#7][#6][#6X3]  
 [cH]  
 [#6]1[#6][#6][#6][#6][#7]1

0.9872  
 0.9843  
 0.9775

|                                  |        |                                           |        |
|----------------------------------|--------|-------------------------------------------|--------|
| [cX3H1]([cX3H1])[cX3H1]          | 0.9968 | [#7][#6][#6][#6X3]                        | 0.9751 |
| [#6X3][#6X3][#6X3][#6X3]         | 0.9967 | [#6H1][#6H1]                              | 0.9512 |
| best positives                   | prob   | best negatives                            | prob   |
| [#6H1]                           | 0.9999 | [OX2H0]1[CX4H2][CX4H2][CX4H1][CX4H1]1     | 0.0    |
| [cH][cH]                         | 0.9996 | [OX1H0]=[CX3H0]1[CX4H1][CX4H1][CX4H2]1    | 0.0    |
| [#6X3][#6X3]                     | 0.9984 | [CX4H0]([OX2H1])([CX4H3])([CX4H2])[CX4H1] | 0.0    |
| [cX3H1]([cX3H1])[cX3H1]          | 0.9968 | [OX2H0][CX4H2][CX4H2][CX4H1][OX2H0]       | 0.0    |
| [#6X3][#6X3][#6X3][#6X3]         | 0.9967 | [OX2H0][CX4H2][CX4H1]([CX4H1])[CX4H3]     | 0.0    |
| [#7][#6][#6X3]                   | 0.9872 | [CX4H1]([CX4H3])([CX4H2])[CX4H0]          | 0.0    |
| [cH]                             | 0.9843 | [CX4H1]([OX2H1])([CX4H2])[CX2H0]          | 0.0    |
| [#6]1[#6][#6][#6][#6][#7]1       | 0.9775 | [CX3H0](=[OX1H0])([CX4H1])[CX4H0]         | 0.0    |
| [#7][#6][#6][#6X3]               | 0.9751 | [CX4H0]([OX2H0])([CX4H3])([CX4H2])[CX4H2] | 0.0    |
| [#6H1][#6H1]                     | 0.9512 | [CX4H0]([OX2H0])([CX4H3])([CX4H2])[CX4H1] | 0.0    |
| worst negatives                  | prob   | worst positives                           | prob   |
| [cX3H1]([cX3H1])[cX3H0]          | 0.949  | [#6H1][#7][#6H1]                          | 0.4317 |
| [#6]1[#6][#6][#6][#6][#6]1       | 0.9078 | [#6X3][#7][#6X3]                          | 0.6631 |
| [#6X3H1][#6X3H0]                 | 0.8516 | [cX3H1]([nX2H0])[cX3H1]                   | 0.8868 |
| [#6X3H1][#6X3H1][#6X3H0][#6X3H1] | 0.7913 | [#6H1][#6H1]                              | 0.9512 |
| [#7][#6H0][#6H1]                 | 0.5639 | [#7][#6][#6][#6X3]                        | 0.9751 |
| [#7][#6X3H0][#6X3H1]             | 0.5349 | [#6]1[#6][#6][#6][#6][#7]1                | 0.9775 |
| [#7X3H2]                         | 0.3616 | [cH]                                      | 0.9843 |
| [#7H2][#6H0]                     | 0.2407 | [#7][#6][#6X3]                            | 0.9872 |
| [#8][#6][#6][#6X3]               | 0.1467 | [#6X3][#6X3][#6X3][#6X3]                  | 0.9967 |
| [cH]cO                           | 0.1409 | [cX3H1]([cX3H1])[cX3H1]                   | 0.9968 |

---

Example 202 true smiles: C1CCOC1 formula: C4H8O  
 Index of correct structure: 0 of 22  
 True structure loss: 0.006421  
 True structure:

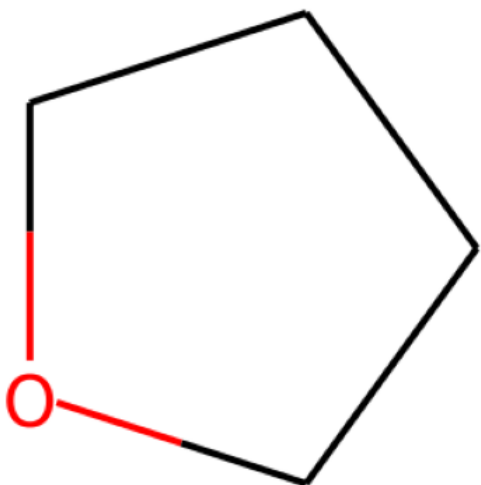

Experimental <sup>13</sup>C NMR (solvent: CDCl<sub>3</sub>)

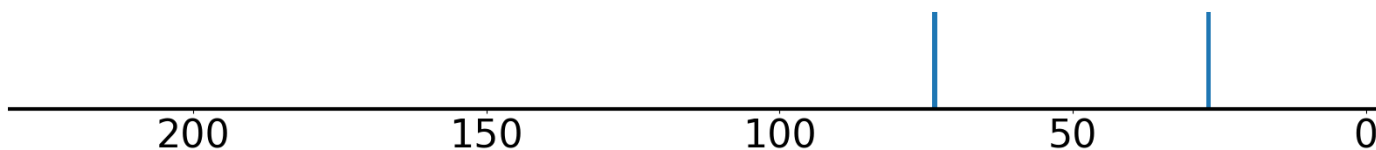

Experimental <sup>1</sup>H NMR (solvent: D<sub>2</sub>O)

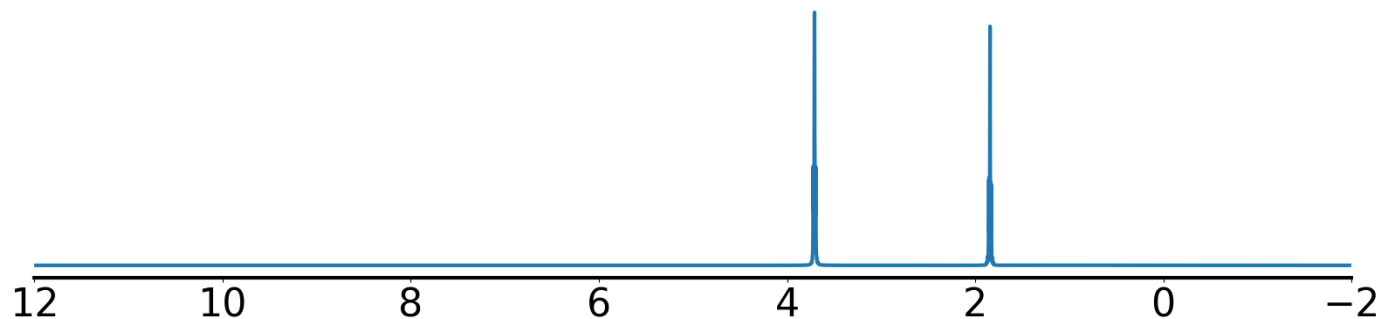

Top predicted structures (loss):

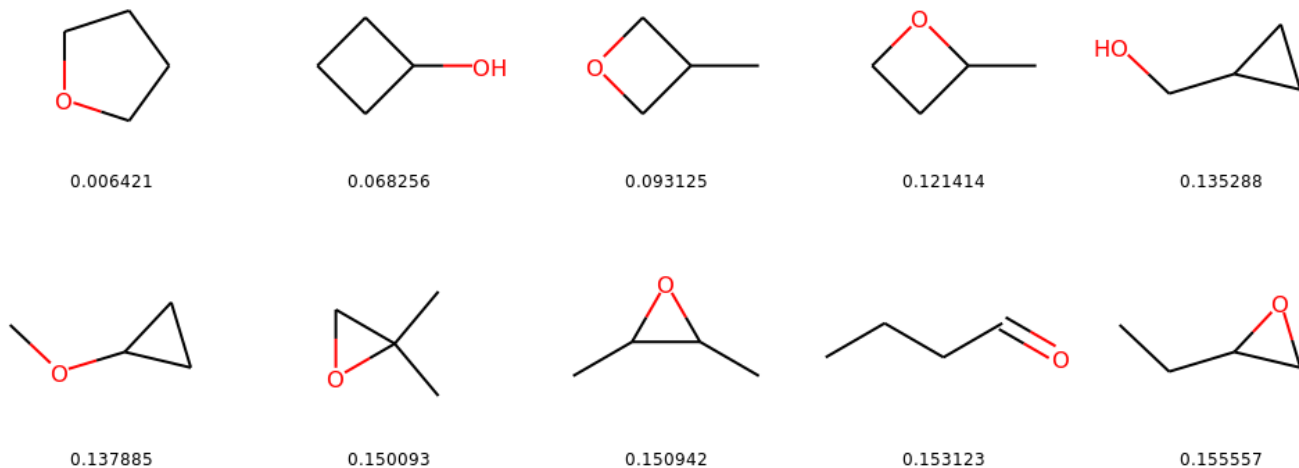

Top predicted substructures  
 [CX4H2]([#6])[#6]  
 [#8][#6][#6H2]  
 [CX4H2]([#6])[O]

prob  
 0.9896  
 0.9811  
 0.9606

[CX4H2][CX4H2]  
 [CH2X4](O)[CX4H2][CX4H2]  
 [CX4H2][CX4H2][CX4H2][CX4H2]

0.8752  
 0.8612  
 0.796

|                              |        |                                        |        |
|------------------------------|--------|----------------------------------------|--------|
| OCC[CH2]                     | 0.9472 | [CX4H2]([CX4H2])[CX4H2]                | 0.7903 |
| [OX2H0][CX4H2][CX4H2][CX4H2] | 0.9278 | [CH2X4](O)[CX4H2]                      | 0.741  |
| best positives               | prob   | best negatives                         | prob   |
| [CX4H2]([#6])[#6]            | 0.9896 | [OX1H0]=[CX3H0]1[CX4H1][CX4H1][CX4H2]1 | 0.0    |
| [#8][#6][#6H2]               | 0.9811 | [#6H3][#6H1][#6H1]=[#7]                | 0.0    |
| [CX4H2]([#6])[O]             | 0.9606 | [CX2H0](#[CX2H1])[cX3H0]               | 0.0    |
| OCC[CH2]                     | 0.9472 | [CX3H1](=[CX3H2])[cX3H0]               | 0.0    |
| [OX2H0][CX4H2][CX4H2][CX4H2] | 0.9278 | [CX3H0](=[CX3H1])([CX4H1])[CX2H0]      | 0.0    |
| [CX4H2][CX4H2]               | 0.8752 | C=CC=CC#C                              | 0.0    |
| [CH2X4](O)[CX4H2][CX4H2]     | 0.8612 | [#7][#6]=[#6][#6][#6]=[#7]             | 0.0    |
| [CX4H2][CX4H2][CX4H2][CX4H2] | 0.796  | [CX3H0](=[CX3H2])([CX4H2])[CX4H1]      | 0.0    |
| [CX4H2]([CX4H2])[CX4H2]      | 0.7903 | [CX3H0](=[CX3H2])([CX4H1])[CX3H1]      | 0.0    |
| [CH2X4](O)[CX4H2]            | 0.741  | [#7][#6]=[#6][#6][#7]                  | 0.0    |
| worst negatives              | prob   | worst positives                        | prob   |
| [#8]1[#6][#6][#6][#6][#6]1   | 0.1766 | C1OCCC1                                | 0.295  |
| [#8][#6][#6][#8]             | 0.1541 | [CX4H2][OX2H0][CX4H2]                  | 0.6094 |
| [CX4H3][#6]                  | 0.154  | [CX4H2]([OX2H0])[CX4H2]                | 0.7178 |
| [OX2H1]                      | 0.1356 | [CH2X4](O)[CX4H2]                      | 0.741  |
| [CH3][#6][#8]                | 0.1124 | [CX4H2]([CX4H2])[CX4H2]                | 0.7903 |
| [#6H1][#6H2]                 | 0.111  | [CX4H2][CX4H2][CX4H2][CX4H2]           | 0.796  |
| [#8][#6][#6H2][#8]           | 0.1057 | [CH2X4](O)[CX4H2][CX4H2]               | 0.8612 |
| [#6H1]                       | 0.1035 | [CX4H2][CX4H2]                         | 0.8752 |
| CCCCC                        | 0.1033 | [OX2H0][CX4H2][CX4H2][CX4H2]           | 0.9278 |
| [OX2H0][CX4H1][CX4H3]        | 0.0868 | OCC[CH2]                               | 0.9472 |

---

Example 203 true smiles: CCCC=O formula: C4H8O  
 Index of correct structure: 1 of 22  
 True structure loss: 0.030431  
 True structure:

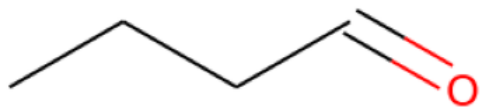

Experimental <sup>13</sup>C NMR (solvent: CDCl<sub>3</sub>)

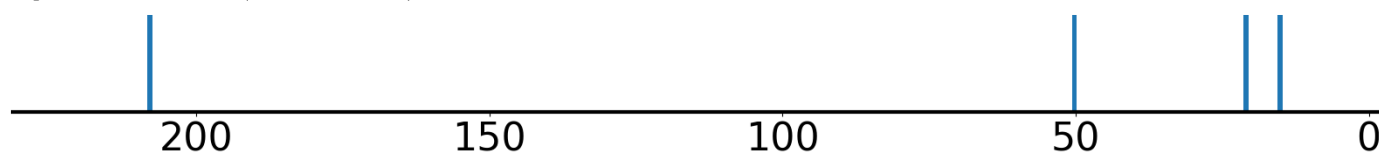

Experimental <sup>1</sup>H NMR (solvent: D<sub>2</sub>O)

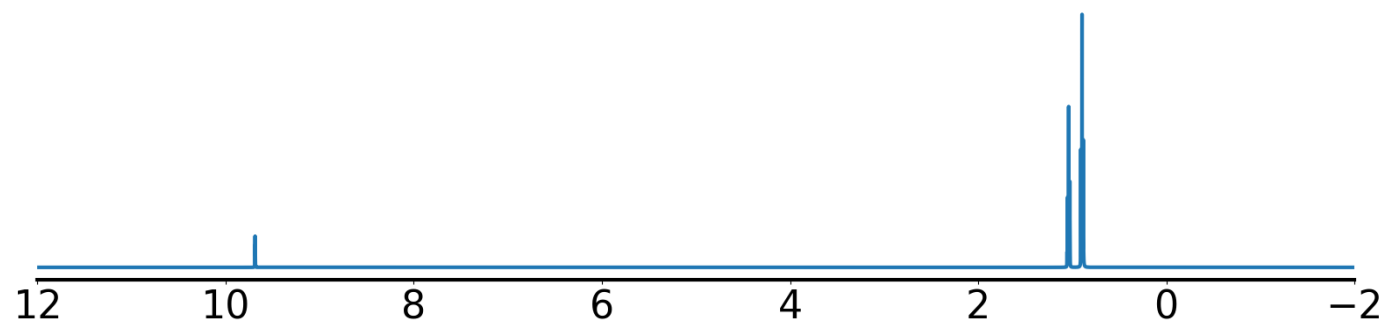

Top predicted structures (loss):

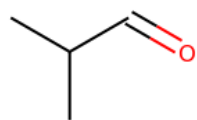

0.020199

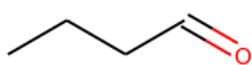

0.030431

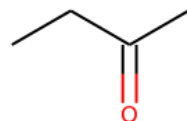

0.107416

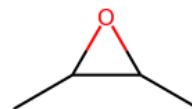

0.143962

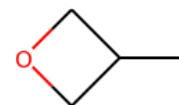

0.167981

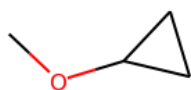

0.171477

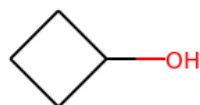

0.174714

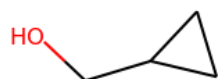

0.183314

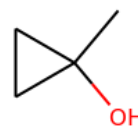

0.188553

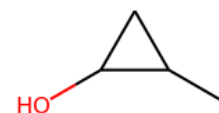

0.211463

Top predicted substructures

[CX3H1](=O)[#6]  
 [CX3](=[OX1])C  
 [CX4H3][#6]

prob  
 0.9997  
 0.9994  
 0.9981

[#6H3][#6][#6]  
 [#6X3][#6][#6][#6H3]  
 [CX4H3][CX4H1]

0.9862  
 0.7682  
 0.7426



|                           |        |                                   |        |
|---------------------------|--------|-----------------------------------|--------|
| [CX4H3]                   | 0.9968 | [CX4H2]( [#6] ) [#6]              | 0.7244 |
| [#6H1]                    | 0.9951 | [CX4H3][CX4H2]                    | 0.6874 |
| best positives            | prob   | best negatives                    | prob   |
| [CX3H1](=O) [#6]          | 0.9997 | C=CCCC#C                          | 0.0    |
| [CX3](=[OX1])C            | 0.9994 | CCC=CC#C                          | 0.0    |
| [CX4H3] [#6]              | 0.9981 | [CX2H1]#[CX2H0][CX3H1]=[CX3H0]    | 0.0    |
| [CX4H3]                   | 0.9968 | [CX3H0](=[CX3H1])([OX2H0])[CX2H0] | 0.0    |
| [#6H1]                    | 0.9951 | CC=CC#CC                          | 0.0    |
| [#6H3] [#6] [#6]          | 0.9862 | [CX2H0](#[CX2H1])[CX3H0]          | 0.0    |
| [#6X3] [#6] [#6] [#6H3]   | 0.7682 | [CX3H2]=[CX3H0][OX2H0][CX4H2]     | 0.0    |
| [CX4H2]( [#6] ) [#6]      | 0.7244 | [CX2H0](#[CX2H1])[CX3H0]          | 0.0    |
| [CX4H3][CX4H2]            | 0.6874 | CC=CCC#C                          | 0.0    |
| [CX4H2][CX4H2]            | 0.5008 | [CX2H0](#[CX2H1])[CX3H1]          | 0.0    |
| worst negatives           | prob   | worst positives                   | prob   |
| [CX4H3][CX4H1]            | 0.7426 | [CX4H2]( [CX4H2] ) [CX3H1]        | 0.0019 |
| O=[CX3][CX4H]             | 0.6661 | [OX1H0]=[CX3H1][CX4H2][CX4H2]     | 0.0219 |
| [#6H1] [#6H1]             | 0.5494 | [CX4H2][CX3H]                     | 0.0652 |
| [#8]=[#6H1] [#6H1]        | 0.423  | [CX4H2][CX3]=O                    | 0.1516 |
| [#6H3] [#6] [#6] [#6H3]   | 0.382  | [#6H1] [#6H2]                     | 0.174  |
| [CX3H][CX4H]              | 0.3545 | [CX3H1](=[OX1H0])[CX4H2]          | 0.2456 |
| [CHX4]( [CH3X4] ) [CH3X4] | 0.3178 | [CX4H2]CC=O                       | 0.2582 |
| [#6H3] [#6] [#6X3]        | 0.3024 | [CX4H2]( [CX4H3] ) [CX4H2]        | 0.4085 |
| [CX3H1](=[OX1H0]) [CX4H1] | 0.1718 | [CX4H2][CX4H2]                    | 0.5008 |
| [#8]=[#6] [#6H1] [#6H1]   | 0.1664 | [CX4H3][CX4H2]                    | 0.6874 |

---

Example 204 true smiles: COCCOC formula: C4H10O2  
 Index of correct structure: 0 of 20  
 True structure loss: 0.006334  
 True structure:

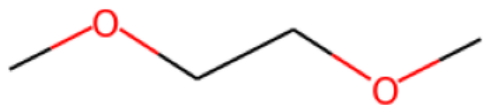

Experimental 13C NMR (solvent: CDCl3)

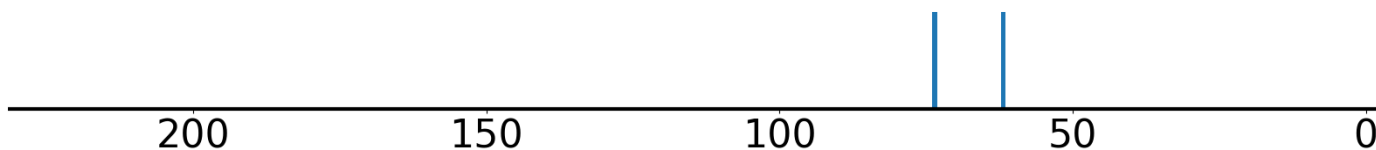

Experimental 1H NMR (solvent: CDCl3)

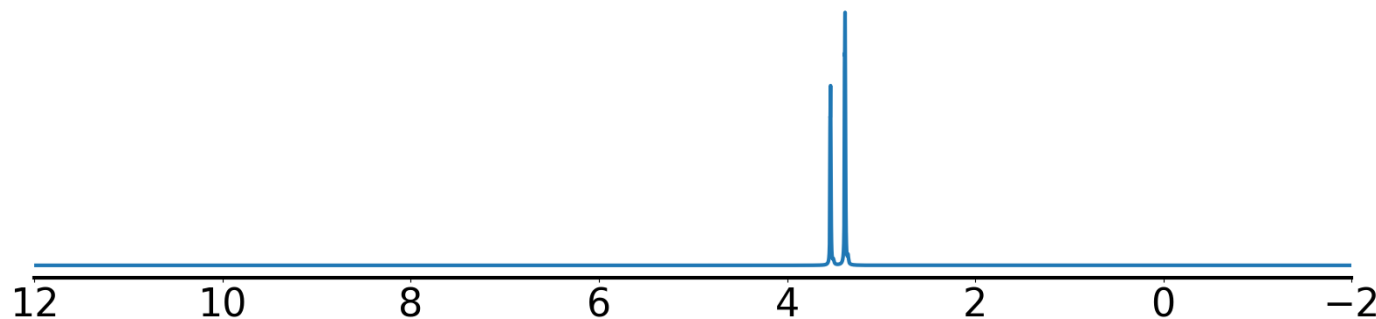

Top predicted structures (loss):

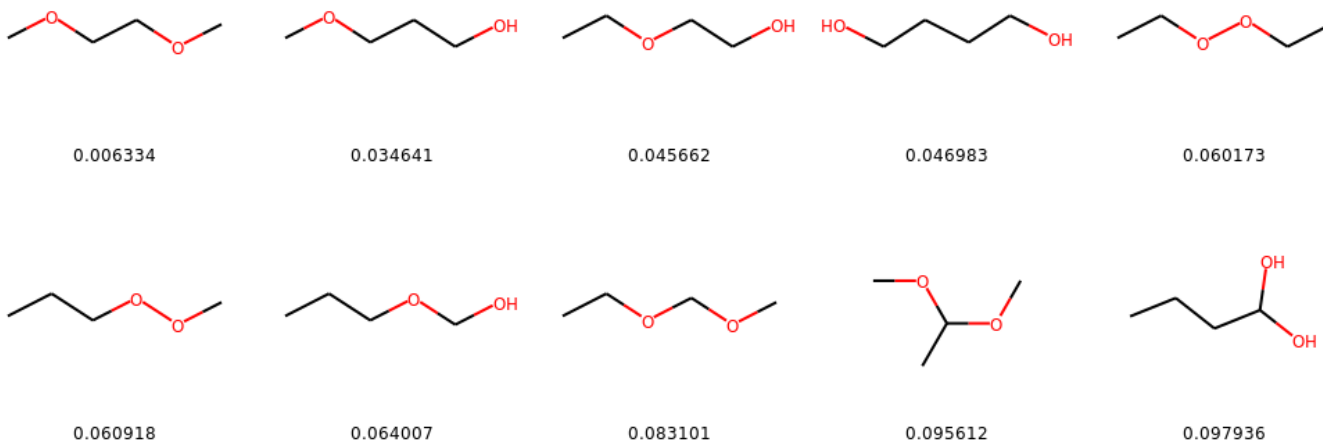

Top predicted substructures  
 [CX4H2]([#6])[O]  
 [#8][#6][#6H2]  
 [CX4H2]([OX2H0])[CX4H2]

prob  
 0.9976  
 0.9624  
 0.9415

[#8][#6][#6H2][#8]  
 [OX2H0][CX4H2][CX4H2][OX2H0]  
 [CX4H3]

0.8997  
 0.885  
 0.8737

|                              |        |                                   |        |
|------------------------------|--------|-----------------------------------|--------|
| O[CX4H2][CX4H2]O             | 0.9395 | [CX4H3][OX2H0]                    | 0.8446 |
| [CH2X4](O)[CX4H2]            | 0.9041 | [CX4H2][CX4H2]                    | 0.8434 |
| best positives               | prob   | best negatives                    | prob   |
| [CX4H2]([#6])[O]             | 0.9976 | [CX2H0](#[NX1H0])[CX3H1]          | 0.0    |
| [#8][#6][#6H2]               | 0.9624 | C=CC=CC#C                         | 0.0    |
| [CX4H2]([OX2H0])[CX4H2]      | 0.9415 | [#6X2][#6H1][#6X2]                | 0.0    |
| O[CX4H2][CX4H2]O             | 0.9395 | [#7][#6]=[#6][#6]#[#7]            | 0.0    |
| [CH2X4](O)[CX4H2]            | 0.9041 | [CX2H1]#[CX2H0][CX3H1]=[CX3H0]    | 0.0    |
| [#8][#6][#6H2][#8]           | 0.8997 | [CX3H0](=[OX1H0])([CX4H1])[CX4H0] | 0.0    |
| [OX2H0][CX4H2][CX4H2][OX2H0] | 0.885  | [CX4H2]([CX4H0])[CX2H0]           | 0.0    |
| [CX4H3]                      | 0.8737 | [CX2H0](#[CX2H1])[CX3H0]          | 0.0    |
| [CX4H3][OX2H0]               | 0.8446 | [#7][#6][#6]#[#7]                 | 0.0    |
| [CX4H2][CX4H2]               | 0.8434 | CCC=CC#C                          | 0.0    |
| worst negatives              | prob   | worst positives                   | prob   |
| [CX4H2][OX2H0][CX4H2]        | 0.5821 | [CX4H3][OX2H0][CX4H2]             | 0.6928 |
| OCC[CH2]                     | 0.3817 | [#8][#6][#6][#8]                  | 0.6971 |
| [CX4H2]([OX2H1])[CX4H2]      | 0.3618 | [CX4H2][CX4H2]                    | 0.8434 |
| [CX4H2](O)[CHX4]             | 0.2719 | [CX4H3][OX2H0]                    | 0.8446 |
| [#7X3][#6H2]                 | 0.2673 | [CX4H3]                           | 0.8737 |
| [CX4H]O                      | 0.2498 | [OX2H0][CX4H2][CX4H2][OX2H0]      | 0.885  |
| [#6H1][#6H2]                 | 0.2334 | [#8][#6][#6H2][#8]                | 0.8997 |
| [OX2H1]                      | 0.1687 | [CH2X4](O)[CX4H2]                 | 0.9041 |
| [#6H1]                       | 0.1593 | O[CX4H2][CX4H2]O                  | 0.9395 |
| O[CX4H][CX4H2]               | 0.0793 | [CX4H2]([OX2H0])[CX4H2]           | 0.9415 |

---

Example 205 true smiles: CC(O)C(C)O formula: C4H10O2  
 Index of correct structure: 0 of 20  
 True structure loss: 0.005398  
 True structure:

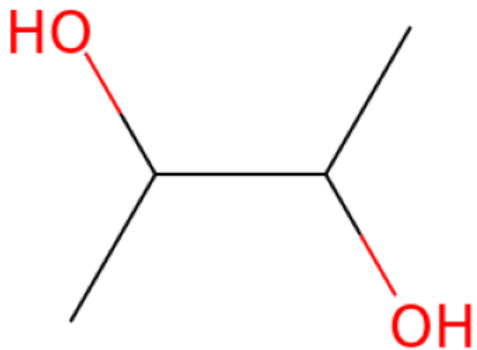

Experimental <sup>13</sup>C NMR (solvent: CDCl<sub>3</sub>)

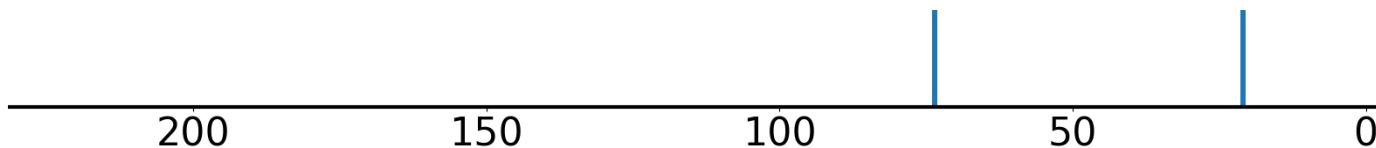

Experimental <sup>1</sup>H NMR (solvent: D<sub>2</sub>O)

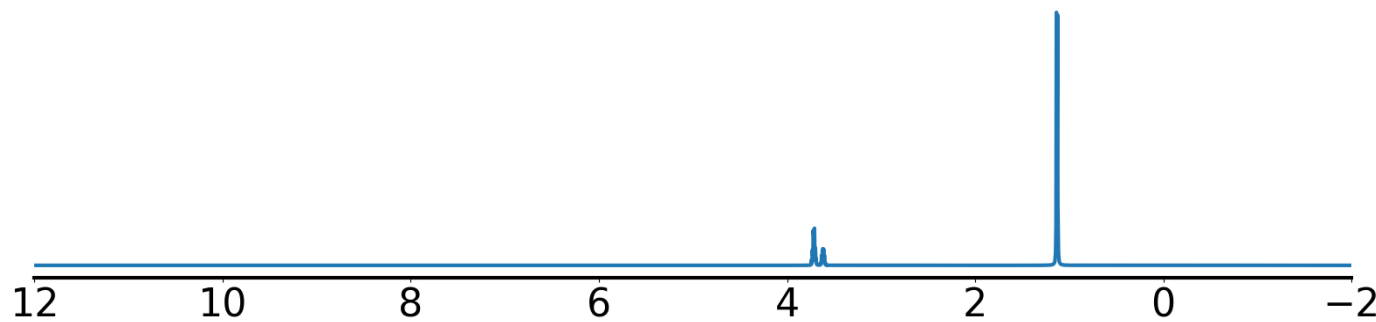

Top predicted structures (loss):

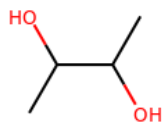

0.005398

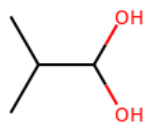

0.036003

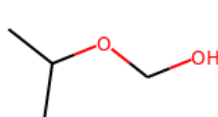

0.045253

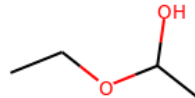

0.047717

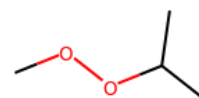

0.055175

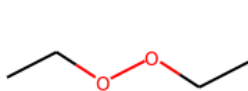

0.06866

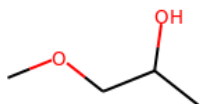

0.072792

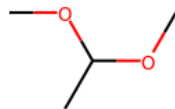

0.074736

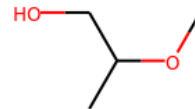

0.081616

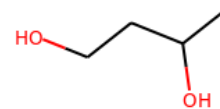

0.082952

Top predicted substructures  
 [CX4H3]  
 [CX4H3][#6]  
 [CX4H3][CX4]O

prob  
 0.9998  
 0.9996  
 0.9977

[OX2H1]  
 [CX4H]O  
 [CH3][#6][#8]

0.9901  
 0.9898  
 0.9815

|                                  |        |                                   |        |
|----------------------------------|--------|-----------------------------------|--------|
| [#6H3][#6][#6]                   | 0.9962 | [CX4H3][CX4H1][OX2H1]             | 0.9723 |
| [#6H1]                           | 0.9961 | [#6X4H3][#6][#8H]                 | 0.9686 |
| best positives                   | prob   | best negatives                    | prob   |
| [CX4H3]                          | 0.9998 | [CX2H1]#[CX2H0][CX3H1]=[CX3H0]    | 0.0    |
| [CX4H3][#6]                      | 0.9996 | CCC=CC#C                          | 0.0    |
| [CX4H3][CX4]O                    | 0.9977 | C=CC=CC#C                         | 0.0    |
| [#6H3][#6][#6]                   | 0.9962 | CC=CCC#C                          | 0.0    |
| [#6H1]                           | 0.9961 | C=CCCC#C                          | 0.0    |
| [OX2H1]                          | 0.9901 | CC=CC#CC                          | 0.0    |
| [CX4H]O                          | 0.9898 | [CX3H0](=[CX3H1])([CX4H2])[CX2H0] | 0.0    |
| [CH3][#6][#8]                    | 0.9815 | CC#CCC=C                          | 0.0    |
| [CX4H3][CX4H1][OX2H1]            | 0.9723 | [CX3H0](=[CX3H1])([OX2H0])[CX2H0] | 0.0    |
| [#6X4H3][#6][#8H]                | 0.9686 | [OX1H0]=[CX3H0][CX2H0]#[CX2H1]    | 0.0    |
| worst negatives                  | prob   | worst positives                   | prob   |
| [CX4H1]([OX2H1])([CX4H1])[CX4H1] | 0.5259 | [#6H3][#6][#6][#6H3]              | 0.5228 |
| [CX4H](O)([CH])[CH]              | 0.4094 | [OX2H1][CX4H1][CX4H1][OX2H1]      | 0.6797 |
| [#6X4H1][#6X4H1][#6X4H1]         | 0.247  | [#6H1][#6H1]                      | 0.8192 |
| [CHX4]([CH3X4])[CH3X4]           | 0.2416 | [CX4H](O)CO                       | 0.8483 |
| [CX4H2](O)[CHX4]                 | 0.1218 | [#8][#6H1][#6H1][#6H3]            | 0.8717 |
| [#8][#6][#6H2]                   | 0.0845 | [#8][#6][#6][#8]                  | 0.8951 |
| [CX4H1]([OX2H1])([CX4H2])[CX4H1] | 0.0837 | [CH3]CC[OH]                       | 0.9001 |
| O[CX4H2][CX4H2]O                 | 0.0748 | [CX4H1]([OX2H1])([CX4H3])[CX4H1]  | 0.9091 |
| [#6X4H2][#6H1][#8H]              | 0.0573 | [CX4H3][CX4H1]                    | 0.9094 |
| [OX2H0][CX4H1][CX4H3]            | 0.0567 | [OH][CX4H]                        | 0.9459 |

---

Example 206 true smiles: CCC(=O)O formula: C3H6O2  
 Index of correct structure: 0 of 18  
 True structure loss: 0.00581  
 True structure:

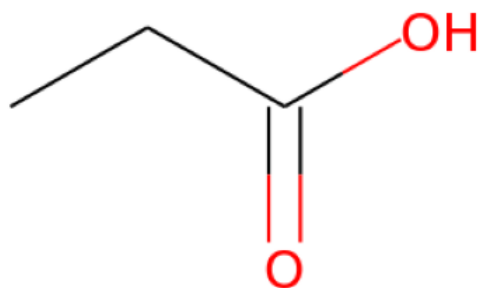

Experimental <sup>13</sup>C NMR (solvent: CDCl<sub>3</sub>)

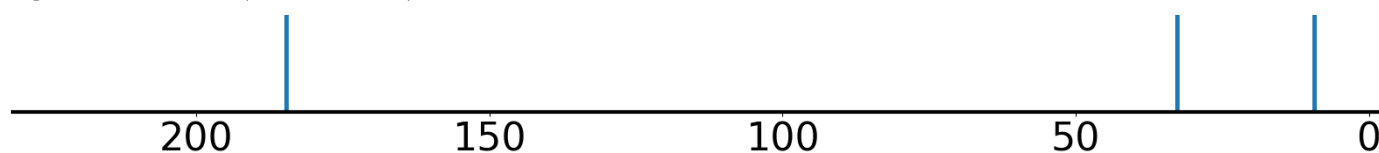

Experimental <sup>1</sup>H NMR (solvent: D<sub>2</sub>O)

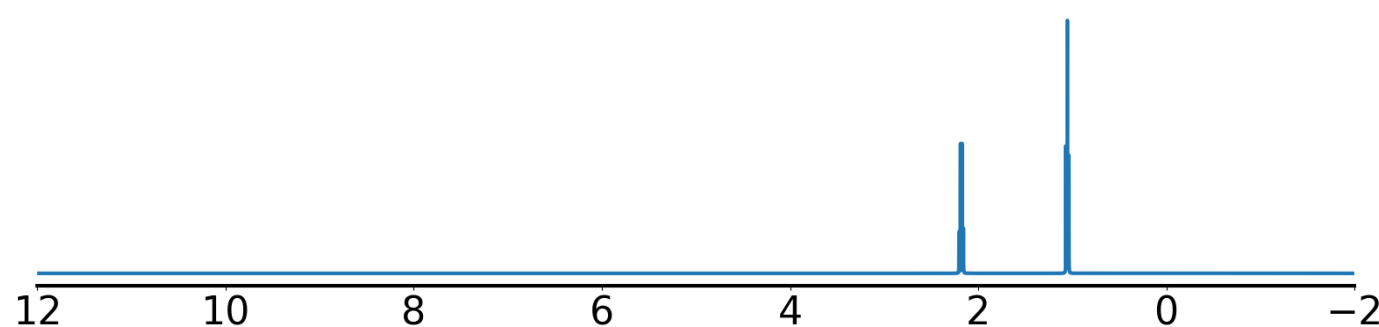

Top predicted structures (loss):

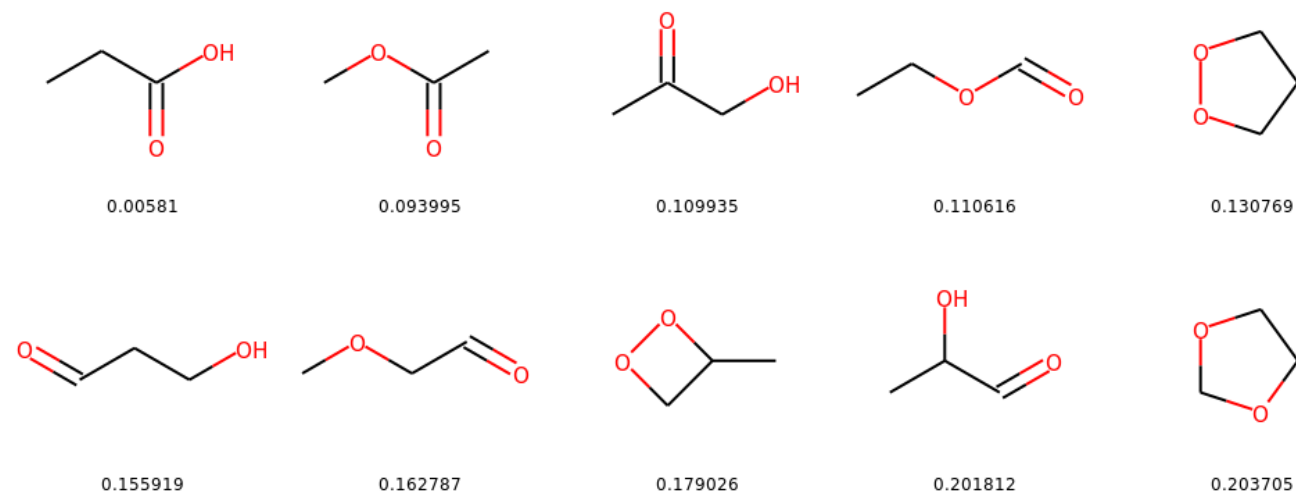

Top predicted substructures  
 [CX4H3]  
 [CX3](=[OX1])C  
 [CX4H3][#6]

prob  
 0.9988  
 0.9986  
 0.9985

[OX1H0]=[CX3H0][CX4H2][CX4H3]  
 [CX4H2]([#6])[#6]  
 [#8]=[#6][#8]

0.9943  
 0.9904  
 0.972

|                               |        |                                   |        |
|-------------------------------|--------|-----------------------------------|--------|
| [#6H3][#6][#6]                | 0.9979 | [CX3](=O)[OX2H1]                  | 0.9352 |
| [CX4H3][CX4H2]                | 0.9958 | [OX2H1]                           | 0.9304 |
| best positives                | prob   | best negatives                    | prob   |
| [CX4H3]                       | 0.9988 | C=CC=CC#C                         | 0.0    |
| [CX3](=[OX1])C                | 0.9986 | [CX3H0](=[CX3H1])([CX4H1])[CX2H0] | 0.0    |
| [CX4H3][#6]                   | 0.9985 | [CX3H1](=[CX3H1])[CX2H0]          | 0.0    |
| [#6H3][#6][#6]                | 0.9979 | [CX2H0](#[CX2H1])[CX2H0]          | 0.0    |
| [CX4H3][CX4H2]                | 0.9958 | C=CCCC#C                          | 0.0    |
| [OX1H0]=[CX3H0][CX4H2][CX4H3] | 0.9943 | [CX3H1](=[CX3H2])[CX2H0]          | 0.0    |
| [CX4H2]([#6][#6])             | 0.9904 | [CX2H0](#[CX2H1])[CX3H1]          | 0.0    |
| [#8]=[#6][#8]                 | 0.972  | CC=CC#CC                          | 0.0    |
| [CX3](=O)[OX2H1]              | 0.9352 | [CX3H0](=[CX3H1])([OX2H0])[CX2H0] | 0.0    |
| [OX2H1]                       | 0.9304 | CCC#CC#C                          | 0.0    |
| worst negatives               | prob   | worst positives                   | prob   |
| [CX4H2]CC=O                   | 0.2489 | [CH3]CC[OH]                       | 0.3225 |
| [#6X3][#6][#6][#6H3]          | 0.193  | [#8][#6][#6H2]                    | 0.5833 |
| [#6H3][#6H0]                  | 0.1907 | [CX3H0](=[OX1H0])([OX2H1])[CX4H2] | 0.6094 |
| OCC[CH2]                      | 0.1886 | [OX1H0]=[CX3H0]([#8])[CX4H2]      | 0.7454 |
| [#8][#6H0][#6H1]              | 0.1546 | [CX4H2][CX3]=O                    | 0.8182 |
| [OX1H0]=[CX3H0]([#6])[CX4H2]  | 0.0981 | [#6H3][#6][#6X3]                  | 0.8575 |
| [#6H3][#6][#6][#6H3]          | 0.0943 | [CX3](=[OX1])O                    | 0.9017 |
| [#8][#6][#6]=[#8]             | 0.0935 | [CX4H2](CX4H3)[CX3H0]             | 0.9274 |
| [#8]=[#6][#6]=[#8]            | 0.0656 | [OX2H1]                           | 0.9304 |
| [#8]=[#6H0][#6H1]             | 0.0571 | [CX3](=O)[OX2H1]                  | 0.9352 |

---

Example 207 true smiles: CCC(C)CN formula: C5H13N  
 Index of correct structure: 0 of 17  
 True structure loss: 0.013327  
 True structure:

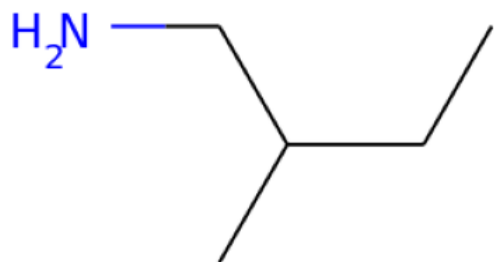

Experimental 13C NMR (solvent: CDCl3)

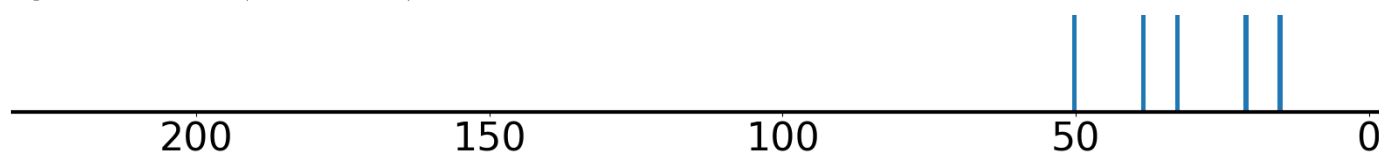

Experimental 1H NMR (solvent: CDCl3)

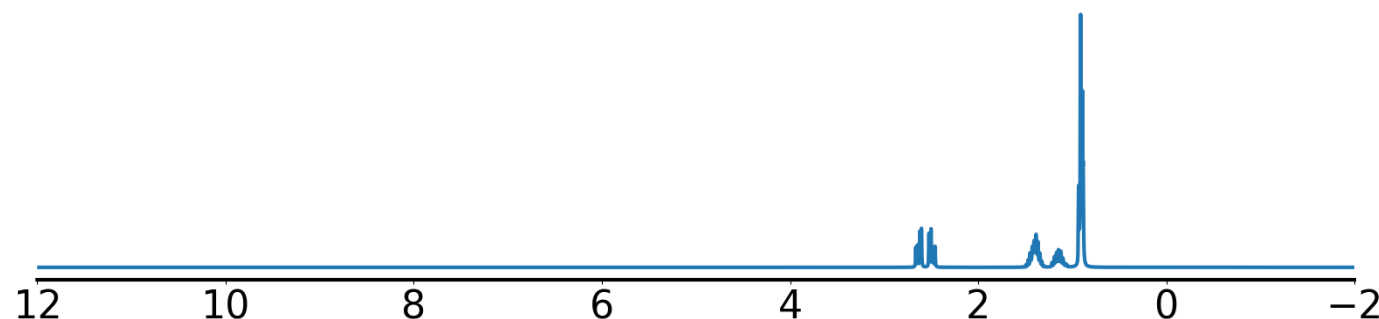

Top predicted structures (loss):

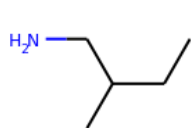

0.013327

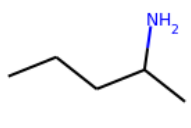

0.023625

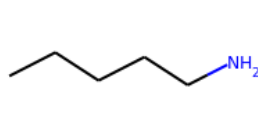

0.031055

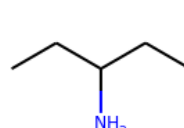

0.032795

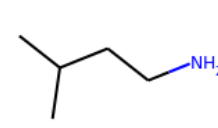

0.033844

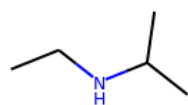

0.036681

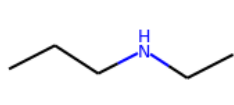

0.03987

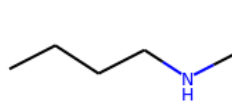

0.045889

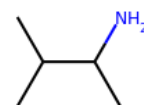

0.046605

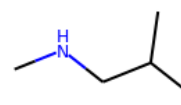

0.055815

Top predicted substructures  
 [CX4H3]  
 [#6H3][#6][#6]  
 [CX4H3][#6]

prob  
 1.0  
 0.9999  
 0.9994

[#7X3H2]  
 [#6H1]  
 [#7][#6H2]

0.9619  
 0.961  
 0.937



|                            |        |                                        |        |
|----------------------------|--------|----------------------------------------|--------|
| [CX4H3][CX4H2]             | 0.9907 | [#7X3][#6H2]                           | 0.9193 |
| [CX4H2]([#6])[#6]          | 0.9789 | [#6H1][#6H2]                           | 0.8595 |
| best positives             | prob   | best negatives                         | prob   |
| [CX4H3]                    | 1.0    | C=CC=CC#C                              | 0.0    |
| [#6H3][#6][#6]             | 0.9999 | C=CCCC#C                               | 0.0    |
| [CX4H3][#6]                | 0.9994 | [CX3H0](=[CX3H1])([OX2H0])[CX2H0]      | 0.0    |
| [CX4H3][CX4H2]             | 0.9907 | [CX2H0](#[CX2H1])[cX3H0]               | 0.0    |
| [CX4H2]([#6])[#6]          | 0.9789 | CCC=CC#C                               | 0.0    |
| [#7X3H2]                   | 0.9619 | [CX2H1]#[CX2H0][CX3H1]=[CX3H0]         | 0.0    |
| [#6H1]                     | 0.961  | CC=CCC#C                               | 0.0    |
| [#7][#6H2]                 | 0.937  | CC=CC#CC                               | 0.0    |
| [#7X3][#6H2]               | 0.9193 | CCC#CC=C                               | 0.0    |
| [#6H1][#6H2]               | 0.8595 | CC#CCC=C                               | 0.0    |
| worst negatives            | prob   | worst positives                        | prob   |
| [CX4H2][CX4H2]             | 0.5598 | [#6H1]([#6H2])[#6H2]                   | 0.3591 |
| [CX4H2]( [CX4H3] ) [CX4H2] | 0.436  | [CX4H1]( [CX4H3] ) ( [CX4H2] ) [CX4H2] | 0.389  |
| [#6H1][#6H1]               | 0.4247 | [#7][#6H2][#6H1]                       | 0.4531 |
| [#6H3][#6H1][#6H1][#7]     | 0.3729 | [CX4H2]( [CX4H3] ) [CX4H1]             | 0.4596 |
| [CX4H2]( [CX4H2] ) [CX4H1] | 0.355  | [#6H3][#6][#6][#6H3]                   | 0.4993 |
| [#7X3H1]                   | 0.3259 | [CX4H2]( [NX3H2] ) [CX4H1]             | 0.5139 |
| [#7H2][#6H1]               | 0.2999 | [CHX4]( [CH3X4] ) [CH2X4]              | 0.598  |
| [CX4H2]( [NX3H1] ) [CX4H2] | 0.2291 | [CX4H3][CX4H1]                         | 0.79   |
| [#7][#6H2][#6H2]           | 0.2033 | [#7H2][#6H2]                           | 0.841  |
| [CX4H2]( [CX4H2] ) [CX4H2] | 0.2029 | [#6H1][#6H2]                           | 0.8595 |

---

Example 208 true smiles: CC(C)C(C)N formula: C5H13N  
 Index of correct structure: 0 of 17  
 True structure loss: 0.009488  
 True structure:

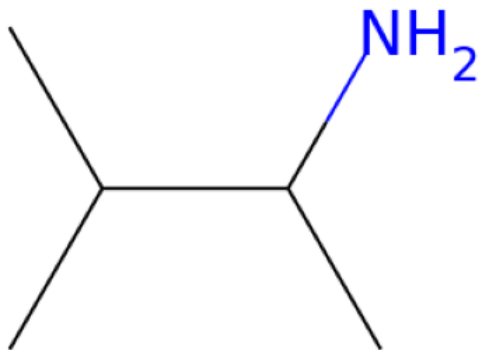

Experimental <sup>13</sup>C NMR (solvent: CDCl<sub>3</sub>)

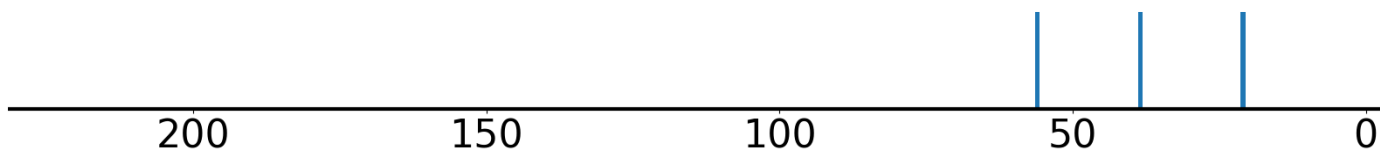

Experimental <sup>1</sup>H NMR (solvent: CDCl<sub>3</sub>)

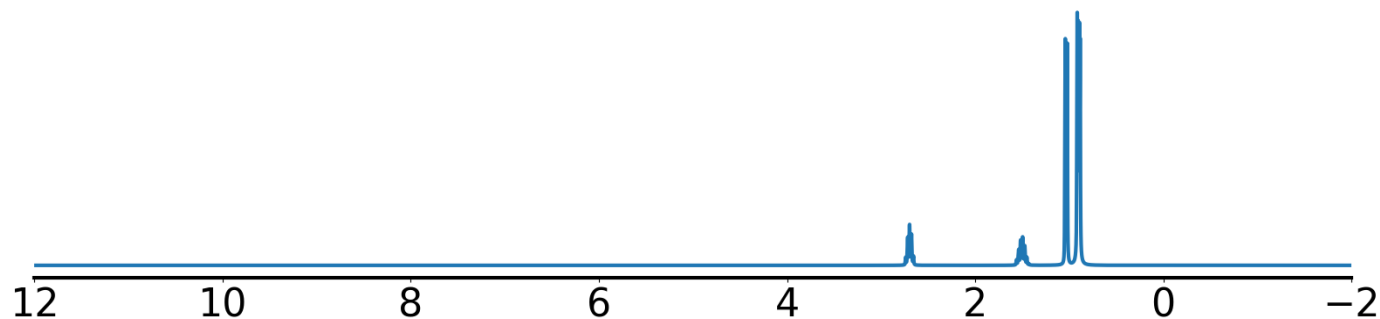

Top predicted structures (loss):

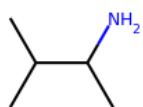

0.009488

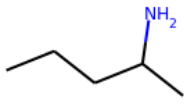

0.031909

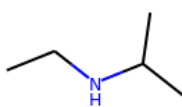

0.032797

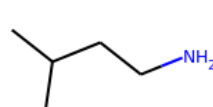

0.038971

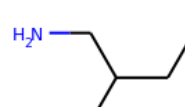

0.043152

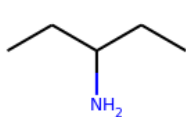

0.048335

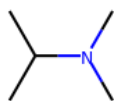

0.055476

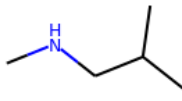

0.060535

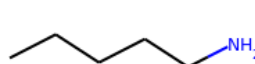

0.064514

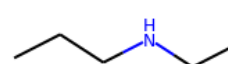

0.066122

Top predicted substructures  
 [CX4H3]  
 [#6H3][#6][#6]  
 [CX4H3][#6]

prob  
 1.0  
 0.9999  
 0.9994

[#7X3H2]  
 [CX4H1]([NX3H2])([CX4H3])[CX4H1]  
 [CHX4]([CH3X4])[CH3X4]

0.9732  
 0.9323  
 0.8898

|                                  |        |                                   |        |
|----------------------------------|--------|-----------------------------------|--------|
| [#6H1]                           | 0.9988 | [#7H2][#6H1]                      | 0.8561 |
| [CX4H3][CX4H1]                   | 0.9914 | [CX4H1]([CX4H3])([CX4H3])[CX4H1]  | 0.6809 |
| best positives                   | prob   | best negatives                    | prob   |
| [CX4H3]                          | 1.0    | [CX2H1]#[CX2H0][CX3H1]=[CX3H0]    | 0.0    |
| [#6H3][#6][#6]                   | 0.9999 | CC=CCC#C                          | 0.0    |
| [CX4H3][#6]                      | 0.9994 | CCC=CC#C                          | 0.0    |
| [#6H1]                           | 0.9988 | C=CC=CC#C                         | 0.0    |
| [CX4H3][CX4H1]                   | 0.9914 | CC=CC#CC                          | 0.0    |
| [#7X3H2]                         | 0.9732 | C=CCCC#C                          | 0.0    |
| [CX4H1]([NX3H2])([CX4H3])[CX4H1] | 0.9323 | [CX2H0]([CX2H1])[CX3H0]           | 0.0    |
| [CHX4]([CH3X4])([CH3X4])         | 0.8898 | [CX3H0](=[CX3H1])([OX2H0])[CX2H0] | 0.0    |
| [#7H2][#6H1]                     | 0.8561 | [CX2H0]([CX2H0])[CX2H0]           | 0.0    |
| [CX4H1]([CX4H3])([CX4H3])[CX4H1] | 0.6809 | [CX2H0]([CX2H1])[CX4H2]           | 0.0    |
| worst negatives                  | prob   | worst positives                   | prob   |
| [CHX4]([CH3X4])([CH2X4])         | 0.5107 | [#7][#6][#6H3]                    | 0.4809 |
| [#7][#6H2]                       | 0.5006 | [#6H3][#6][#6][#6H3]              | 0.578  |
| [#6H1][#6H2]                     | 0.4811 | [#6H1][#6H1]                      | 0.6236 |
| [CX4H1]([CX4H3])([CX4H2])[CX4H1] | 0.3441 | [#6H3][#6H1][#6H1][#7]            | 0.6475 |
| [#7X3][#6H2]                     | 0.3111 | [CX4H1]([CX4H3])([CX4H3])[CX4H1]  | 0.6809 |
| [#6X4H1][#6X4H1][#6X4H1]         | 0.294  | [#7H2][#6H1]                      | 0.8561 |
| [#7X3H1]                         | 0.2593 | [CHX4]([CH3X4])([CH3X4])          | 0.8898 |
| [#7H2][#6H2]                     | 0.208  | [CX4H1]([NX3H2])([CX4H3])[CX4H1]  | 0.9323 |
| [CX4H2]([#6])([#6])              | 0.1816 | [#7X3H2]                          | 0.9732 |
| [#7][#6H2][#6H1]                 | 0.1577 | [CX4H3][CX4H1]                    | 0.9914 |

---

Example 209 true smiles: C[N+](C)(C)[O-] formula: C3H9NO  
 Index of correct structure: -1 of 17  
 True structure loss: 0.013455  
 True structure:

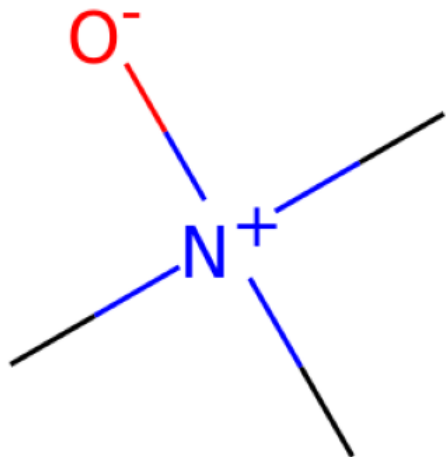

Experimental <sup>13</sup>C NMR (solvent: D2O)

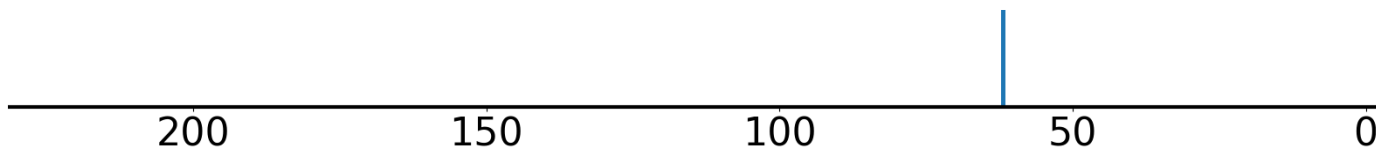

Experimental <sup>1</sup>H NMR (solvent: D2O)

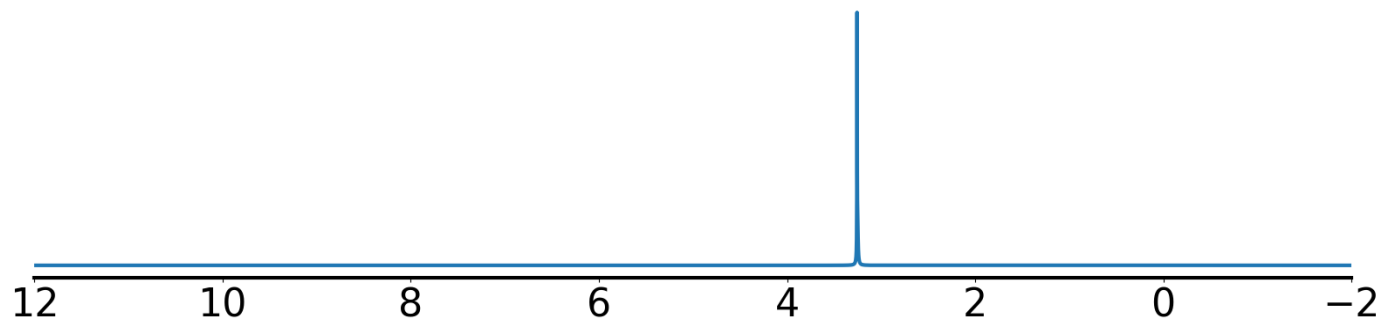

Top predicted structures (loss):

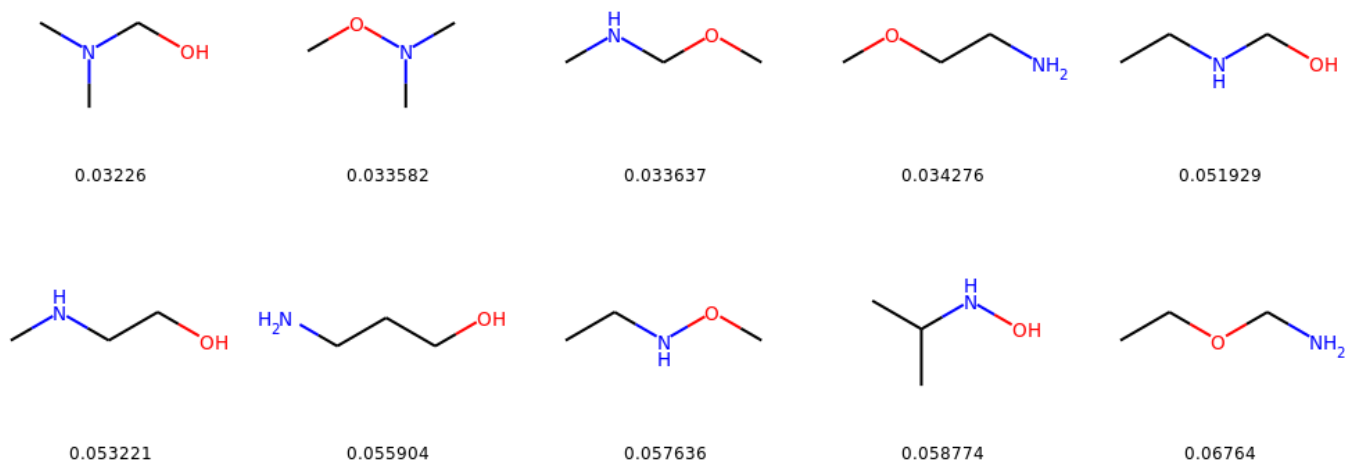

Top predicted substructures  
 [#7X3][#6H2]  
 [CX4H3]  
 [#7][#6H2]

prob  
 0.9249  
 0.8394  
 0.6938

[#7X3H1]  
 [#7X3H2]  
 [#7][#6H2][#6H1]

0.3659  
 0.3623  
 0.2895

|                  |        |                          |        |
|------------------|--------|--------------------------|--------|
| [CX4H3][OX2H0]   | 0.5514 | [#8][#6][#6H2]           | 0.241  |
| [#6H2][#7][#6H2] | 0.5336 | [OX2H1]                  | 0.2003 |
| best positives   | prob   | best negatives           | prob   |
| [CX4H3]          | 0.8394 | [CX2H0](#[CX2H1])[cX3H0] | 0.0    |
| [#6H3][#7]       | 0.0278 | C=CC=CC#C                | 0.0    |
| worst negatives  | prob   | worst positives          | prob   |
| [#7X3][#6H2]     | 0.9249 | [#6H3][#7]               | 0.0278 |
| [#7][#6H2]       | 0.6938 | [CX4H3]                  | 0.8394 |

---

Example 210 true smiles: CNCC(C)C formula: C5H13N  
 Index of correct structure: 0 of 17  
 True structure loss: 0.01223  
 True structure:

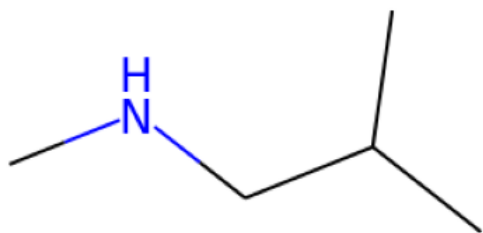

Experimental <sup>13</sup>C NMR (solvent: CDCl<sub>3</sub>)

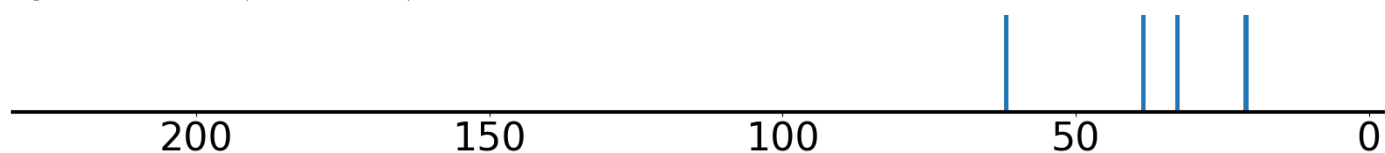

Experimental <sup>1</sup>H NMR (solvent: CDCl<sub>3</sub>)

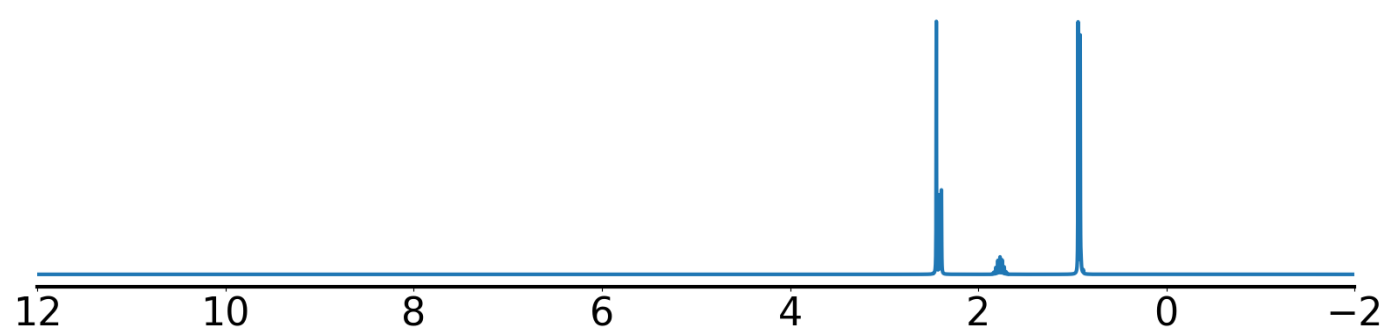

Top predicted structures (loss):

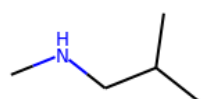

0.01223

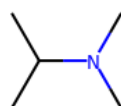

0.029804

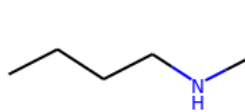

0.039926

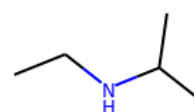

0.04073

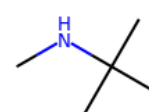

0.04284

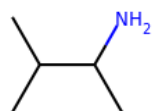

0.04435

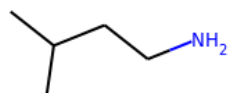

0.046381

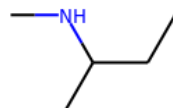

0.048238

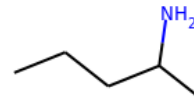

0.050313

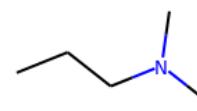

0.051006

Top predicted substructures

[CX4H3]  
[#6H3][#6][#6]  
[#7X3][#6H3]  
[CX4H3][#6]  
[#6H3][#7]

prob  
1.0  
0.9997  
0.9988  
0.9955  
0.9836

[CHX4]([CH3X4])[CH3X4]  
[CX4H3][CX4H1]  
[CX4H3][NX3H1]  
[#6H1]  
[#7X3][#6H2]

0.8869  
0.867  
0.8502  
0.7825  
0.6849

best positives

prob

best negatives

prob

|                                  |        |                                   |        |
|----------------------------------|--------|-----------------------------------|--------|
| [CX4H3]                          | 1.0    | [CX2H0](#[CX2H1])[cX3H0]          | 0.0    |
| [#6H3][#6][#6]                   | 0.9997 | C=CC=CC#C                         | 0.0    |
| [#7X3][#6H3]                     | 0.9988 | C=CCCC#C                          | 0.0    |
| [CX4H3][#6]                      | 0.9955 | CC=CC#CC                          | 0.0    |
| [#6H3][#7]                       | 0.9836 | [CX2H1]#[CX2H0][CX3H1]=[CX3H0]    | 0.0    |
| [CHX4]([CH3X4])[CH3X4]           | 0.8869 | [CX3H0](=[CX3H1])([CX4H1])[CX2H0] | 0.0    |
| [CX4H3][CX4H1]                   | 0.867  | CCC=CC#C                          | 0.0    |
| [CX4H3][NX3H1]                   | 0.8502 | [#6X2][#6H1][#6X2]                | 0.0    |
| [#6H1]                           | 0.7825 | CC=CCC#C                          | 0.0    |
| [#7X3][#6H2]                     | 0.6849 | [CX3H0](=[CX3H1])([OX2H0])[CX2H0] | 0.0    |
| -----                            |        |                                   |        |
| worst negatives                  | prob   | worst positives                   | prob   |
| [#6H3][#6H1][#6H1][#7]           | 0.4644 | [CX4H1]([CX4H3])([CX4H3])[CX4H2]  | 0.133  |
| [#7X3H2]                         | 0.2384 | [CX4H2]([NX3H1])[CX4H1]           | 0.3155 |
| [CX4H1]([CX4H3])([CX4H3])[CX4H1] | 0.2233 | [#7][#6H2][#6H1]                  | 0.3608 |
| [CX4H2]([#6][#6])                | 0.1995 | [#6H1][#6H2]                      | 0.5863 |
| [#6H3][#6][#6][#6H3]             | 0.1972 | [CHX4]([CH3X4])[CH2X4]            | 0.6006 |
| [CX4H1]([CX4H3])([CX4H2])[CX4H2] | 0.1588 | [#6H3][#7][#6H2]                  | 0.6081 |
| [CX4H2][CX4H2]                   | 0.1492 | [#7][#6H2]                        | 0.6609 |
| [#6H1][#6H1]                     | 0.1241 | [#7X3H1]                          | 0.6794 |
| [#6H3][#6H0]                     | 0.1006 | [#7X3][#6H2]                      | 0.6849 |
| [#7H2][#6H1]                     | 0.0946 | [#6H1]                            | 0.7825 |

Example 211 true smiles: CC(C)(C)CN formula: C5H13N  
Index of correct structure: 0 of 17  
True structure loss: 0.011019  
True structure:

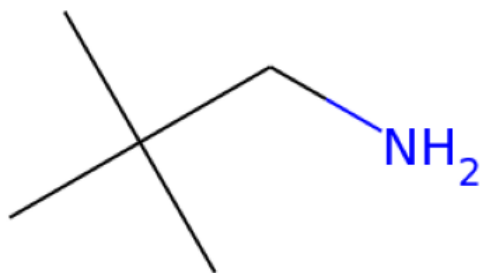

Experimental <sup>13</sup>C NMR (solvent: CDCl<sub>3</sub>)

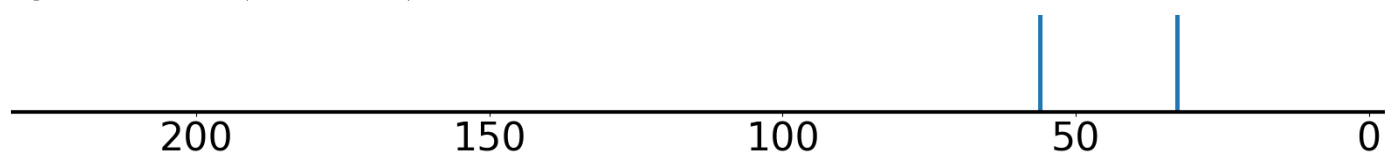

Experimental <sup>1</sup>H NMR (solvent: CDCl<sub>3</sub>)

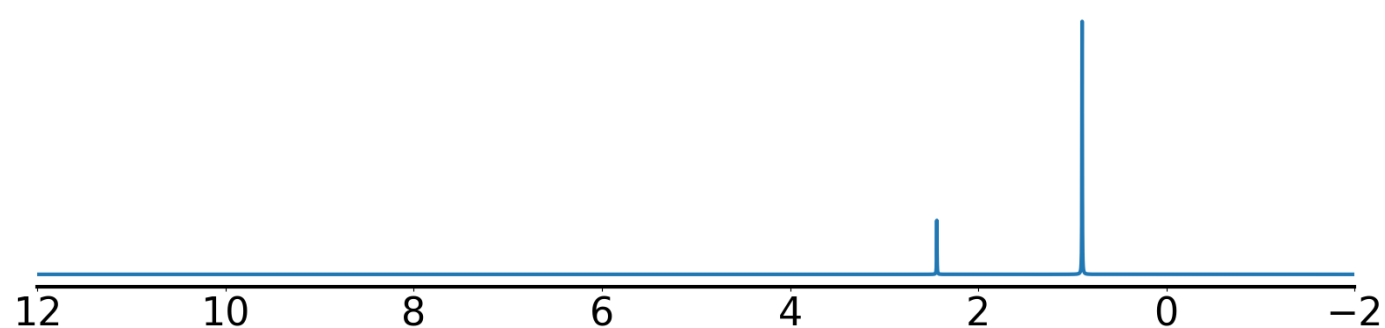

Top predicted structures (loss):

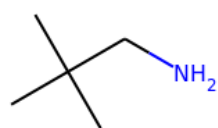

0.011019

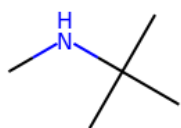

0.02531

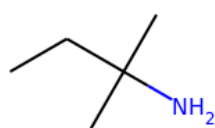

0.041095

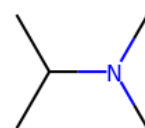

0.05675

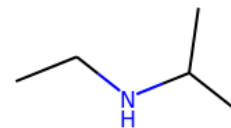

0.057282

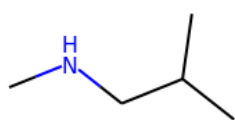

0.057635

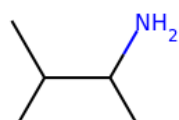

0.06509

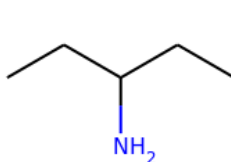

0.065881

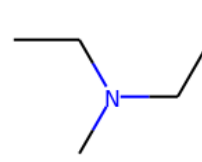

0.068679

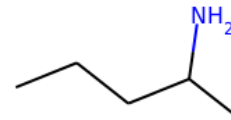

0.071354

Top predicted substructures

[CX4H3]  
[#6H3][#6][#6]  
[CX4]([CX4H3])([CX4H3])[CX4H3]  
[CX4H3][CX4H0][CX4H3]  
[CX4H3][#6]

prob  
0.9997  
0.9991  
0.9984  
0.996  
0.9903

[CX4H3][CX4H0]  
[#6H3][#6H0]  
[#7X3H2]  
[#6H1]  
[#7X3][#6H2]

0.9741  
0.9204  
0.6844  
0.5967  
0.589

best positives

prob

best negatives

prob



|                                |        |                                   |        |
|--------------------------------|--------|-----------------------------------|--------|
| [CX4H3]                        | 0.9997 | CCC#CC#C                          | 0.0    |
| [#6H3][#6][#6]                 | 0.9991 | [CX2H1]#[CX2H0][CX3H1]=[CX3H0]    | 0.0    |
| [CX4]([CX4H3])([CX4H3])[CX4H3] | 0.9984 | C=CCCC#C                          | 0.0    |
| [CX4H3][CX4H0][CX4H3]          | 0.996  | CCC=CC#C                          | 0.0    |
| [CX4H3][#6]                    | 0.9903 | CC=CC#CC                          | 0.0    |
| [CX4H3][CX4H0]                 | 0.9741 | [CX3H0](=[CX3H1])([CX4H1])[CX2H0] | 0.0    |
| [#6H3][#6H0]                   | 0.9204 | [CX2H0](#[CX2H1])[CX3H0]          | 0.0    |
| [#7X3H2]                       | 0.6844 | CC=CCC#C                          | 0.0    |
| [#7X3][#6H2]                   | 0.589  | C=CC=CC#C                         | 0.0    |
| [#7][#6H2]                     | 0.5401 | [CX3H0](=[CX3H1])([OX2H0])[CX2H0] | 0.0    |
| -----                          |        |                                   |        |
| worst negatives                | prob   | worst positives                   | prob   |
| [#6H1]                         | 0.5967 | [#7H2][#6H2]                      | 0.1188 |
| [#7X3H1]                       | 0.4838 | [CX4H2]([NX3H2])[CX4H0]           | 0.1987 |
| [#7H2][#6H1]                   | 0.3169 | [#7][#6H2]                        | 0.5401 |
| [#6H3][#7]                     | 0.2847 | [#7X3][#6H2]                      | 0.589  |
| [#7][#6H2][#6H1]               | 0.2728 | [#7X3H2]                          | 0.6844 |
| [#6H1][#6H2]                   | 0.2358 | [#6H3][#6H0]                      | 0.9204 |
| [#7X3][#6H3]                   | 0.1789 | [CX4H3][CX4H0]                    | 0.9741 |
| [#6H3][#6H0][#6H1][#7]         | 0.1607 | [CX4H3][#6]                       | 0.9903 |
| [#6H2r3]                       | 0.1085 | [CX4H3][CX4H0][CX4H3]             | 0.996  |
| [#6H2][#7][#6H2]               | 0.0996 | [CX4]([CX4H3])([CX4H3])[CX4H3]    | 0.9984 |

Example 212 true smiles: CC(C)CCN formula: C5H13N  
Index of correct structure: 0 of 17  
True structure loss: 0.014666  
True structure:

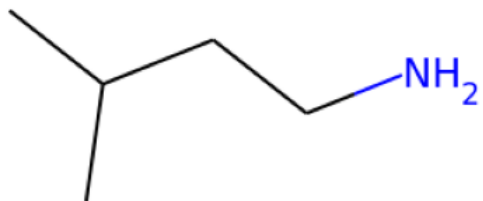

Experimental <sup>13</sup>C NMR (solvent: CDCl<sub>3</sub>)

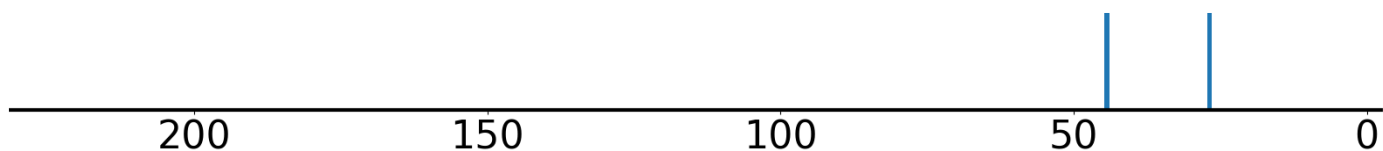

Experimental <sup>1</sup>H NMR (solvent: CDCl<sub>3</sub>)

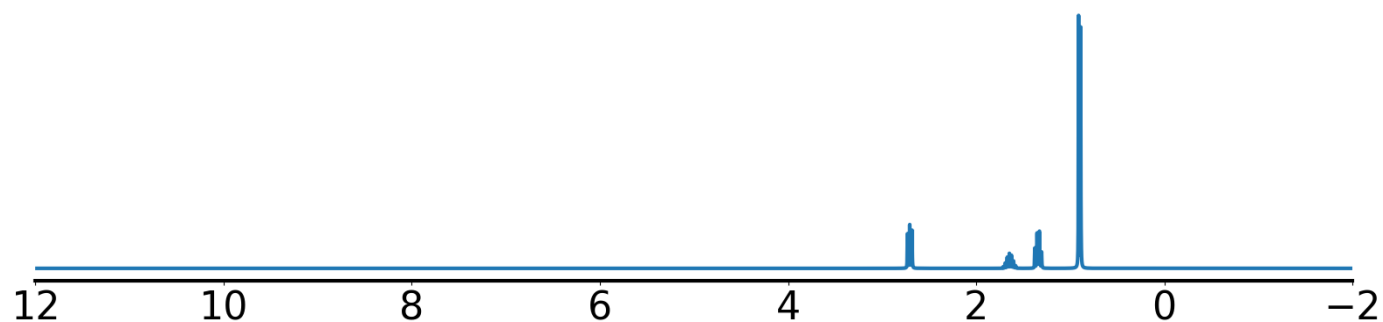

Top predicted structures (loss):

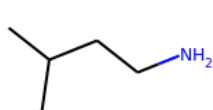

0.014666

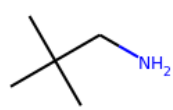

0.027713

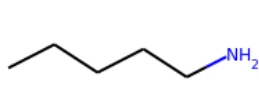

0.029321

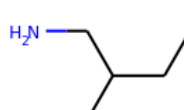

0.032585

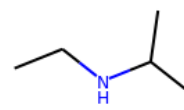

0.039837

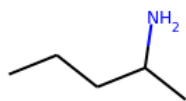

0.048195

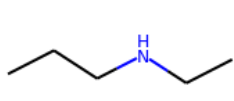

0.050835

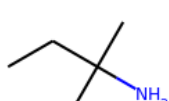

0.052677

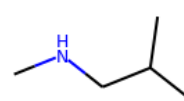

0.052687

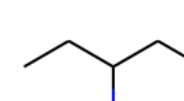

0.056678

Top predicted substructures

[#6H3][#6][#6]  
[CX4H3]  
[#7X3][#6H2]  
[CX4H3][#6]  
[#7H2][#6H2]

prob  
0.9996  
0.9978  
0.9903  
0.9893  
0.9732

[#7][#6H2]  
[#7X3H2]  
[CX4H2]([NX3H2])[CX4H2]  
[CX4H2]([#6])[#6]  
[#7][#6H2][#6H2]

0.9699  
0.9186  
0.8439  
0.8272  
0.7821

best positives

prob

best negatives

prob

|                            |        |                                   |        |
|----------------------------|--------|-----------------------------------|--------|
| [#6H3][#6][#6]             | 0.9996 | [CX2H0](#[CX2H1])[cX3H0]          | 0.0    |
| [CX4H3]                    | 0.9978 | C=CC=CC#C                         | 0.0    |
| [#7X3][#6H2]               | 0.9903 | CC=CCC#C                          | 0.0    |
| [CX4H3][#6]                | 0.9893 | [CX3H0](=[CX3H1])([OX2H0])[CX2H0] | 0.0    |
| [#7H2][#6H2]               | 0.9732 | CCC#CC#C                          | 0.0    |
| [#7][#6H2]                 | 0.9699 | C=CCCC#C                          | 0.0    |
| [#7X3H2]                   | 0.9186 | [CX3H0](=[CX3H1])([CX4H1])[CX2H0] | 0.0    |
| [CX4H2]([NX3H2])[CX4H2]    | 0.8439 | CCC=CC#C                          | 0.0    |
| [CX4H2]([#6])[#6]          | 0.8272 | [CX2H1]#[CX2H0][CX3H1]=[CX3H0]    | 0.0    |
| [#7][#6H2][#6H2]           | 0.7821 | [CX2H0](#[CX2H0])[CX2H0]          | 0.0    |
| worst negatives            | prob   | worst positives                   | prob   |
| [#7][#6H2][#6H1]           | 0.6092 | [CX4H2]([CX4H2])[CX4H1]           | 0.0919 |
| [#6H3][#6H0]               | 0.4801 | [#7][#6H2][#6H2][#6H1]            | 0.2041 |
| [#6H3][#6H0]([#6H2])[#6H2] | 0.4039 | [CX4H2][CX4H2]                    | 0.4587 |
| [CX4H3][CX4H0]             | 0.3601 | [#6H1][#6H2]                      | 0.541  |
| [CX4H2]([NX3H2])[CX4H0]    | 0.3055 | [#6H1]                            | 0.59   |
| [#6H1]([#6H2])[#6H2]       | 0.2877 | [CX4H3][CX4H1]                    | 0.6024 |
| [CX4H2]([CX4H2])[CX4H2]    | 0.2648 | [CHX4]([CH3X4])[CH2X4]            | 0.6604 |
| [CX4H2]([NX3H2])[CX4H1]    | 0.2582 | [CHX4]([CH3X4])[CH3X4]            | 0.7426 |
| [#7X3H1]                   | 0.1703 | [CX4H1]([CX4H3])([CX4H3])[CX4H2]  | 0.7755 |
| [#6H3][#6][#6H3]           | 0.1669 | [#7][#6H2][#6H2]                  | 0.7821 |

Example 213 true smiles: CCCNC formula: C5H13N  
Index of correct structure: 0 of 17  
True structure loss: 0.016642  
True structure:

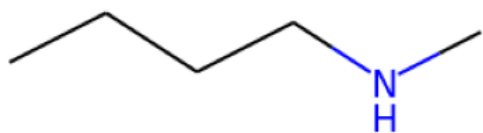

Experimental <sup>13</sup>C NMR (solvent: CDCl<sub>3</sub>)

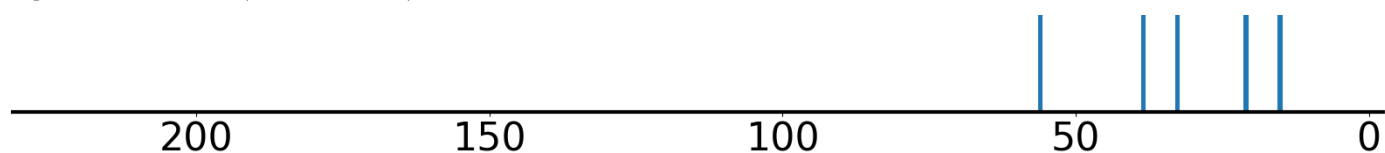

Experimental <sup>1</sup>H NMR (solvent: CDCl<sub>3</sub>)

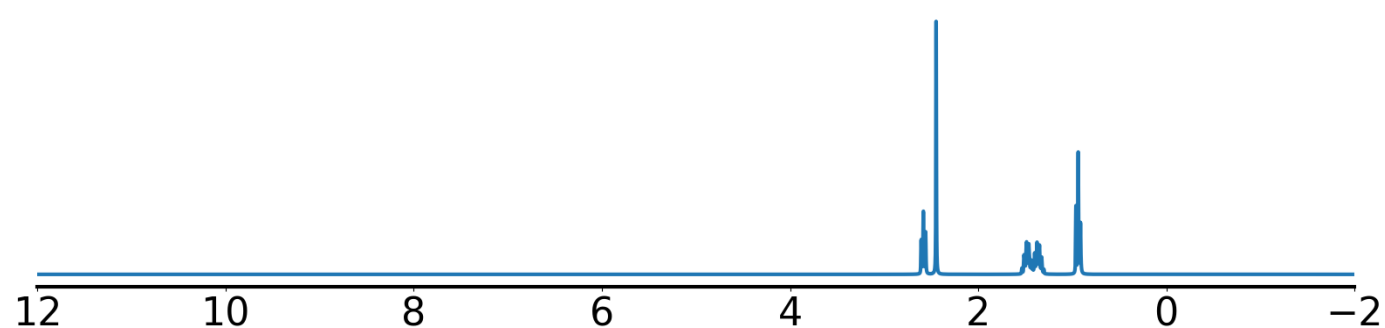

Top predicted structures (loss):

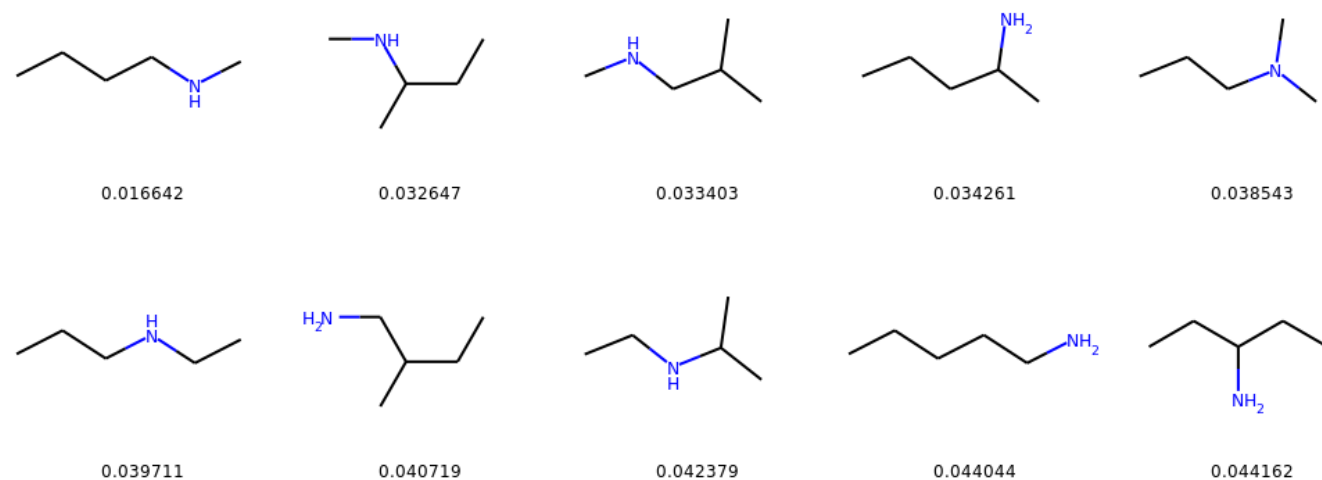

Top predicted substructures

[CX4H3]  
[#6H3][#6][#6]  
[CX4H3][#6]  
[#7X3][#6H3]  
[CX4H3][CX4H2]

prob  
1.0  
0.9994  
0.9993  
0.9955  
0.9908

[CX4H2]([#6])[#6]  
[#6H3][#7]  
[CX4H3][NX3H1]  
[#6H1]  
[#7][#6H2]

0.9874  
0.9791  
0.8863  
0.8169  
0.796

best positives

prob

best negatives

prob

|                         |        |                                   |        |
|-------------------------|--------|-----------------------------------|--------|
| [CX4H3]                 | 1.0    | C=CC=CC#C                         | 0.0    |
| [#6H3][#6][#6]          | 0.9994 | [CX2H0](#[CX2H1])[cX3H0]          | 0.0    |
| [CX4H3][#6]             | 0.9993 | CCC=CC#C                          | 0.0    |
| [#7X3][#6H3]            | 0.9955 | C=CCCC#C                          | 0.0    |
| [CX4H3][CX4H2]          | 0.9908 | [CX3H0](=[CX3H1])([OX2H0])[CX2H0] | 0.0    |
| [CX4H2]([#6])[#6]       | 0.9874 | CC=CC#CC                          | 0.0    |
| [#6H3][#7]              | 0.9791 | CCC#CC#C                          | 0.0    |
| [CX4H3][NX3H1]          | 0.8863 | [CX3H0](=[CX3H1])([CX4H1])[CX2H0] | 0.0    |
| [#7][#6H2]              | 0.796  | [CX2H0](#[CX2H1])[CX3H1]          | 0.0    |
| [#7X3H1]                | 0.7637 | [CX2H1]#[CX2H0][CX3H1]=[CX3H0]    | 0.0    |
| -----                   |        |                                   |        |
| worst negatives         | prob   | worst positives                   | prob   |
| [#6H1]                  | 0.8169 | [#7][#6H2][#6H2]                  | 0.1223 |
| [#6H1][#6H2]            | 0.6088 | [CX4H2]([NX3H1])[CX4H2]           | 0.1841 |
| [CX4H3][CX4H1]          | 0.5615 | [CX4H2]([CX4H2])[CX4H2]           | 0.353  |
| [CHX4]([CH3X4])[CH2X4]  | 0.5281 | [CX4H2][CX4H2]                    | 0.5532 |
| [CX4H2]([NX3H1])[CX4H1] | 0.4053 | [#6H3][#7][#6H2]                  | 0.6932 |
| [CX4H2]([CX4H3])[CX4H1] | 0.36   | [#7X3][#6H2]                      | 0.7106 |
| [#6H3][#6H1][#6H1][#7]  | 0.3215 | [CX4H2]([CX4H3])[CX4H2]           | 0.7297 |
| [#7][#6H2][#6H1]        | 0.2725 | [#7X3H1]                          | 0.7637 |
| CCCCC                   | 0.1812 | [#7][#6H2]                        | 0.796  |
| [#7X3H2]                | 0.1655 | [CX4H3][NX3H1]                    | 0.8863 |
